# Supplementary material for: Predicting the functional effects of voltage-gated potassium channel missense variants with multi-task learning
Source: PubMed Central journal article supplement — eBioMedicine. 2022 Jun 24;81:104115. doi: 10.1016/j.ebiom.2022.104115 (PMC9250003; doi:10.1016/j.ebiom.2022.104115), 2022-06-24
Supplement: mmc1.pdf [file mmc1.pdf]

## Supplementary Material for

### Predicting the functional effects of voltage-gated potassium channel missense variants with multi-task learning

Christian Malte Boßelmann<sup>1,2</sup>, Ulrike B.S. Hedrich<sup>1</sup>, Peter Müller<sup>1</sup>, Lukas Sonnenberg<sup>3</sup>, Shridhar Parthasarathy<sup>4,6</sup>, Ingo Helbig<sup>4-7</sup>, Holger Lerche<sup>1\*†</sup>, Nico Pfeifer<sup>2,8-10\*†</sup>

<sup>1</sup> Department of Neurology and Epileptology, Hertie Institute for Clinical Brain Research, University of Tuebingen, Tuebingen, Germany.

<sup>2</sup> Methods in Medical Informatics, Department of Computer Science, University of Tuebingen, Tuebingen, Germany.

<sup>3</sup> Institute for Neurobiology, University of Tuebingen, Tuebingen, Germany.

<sup>4</sup> Division of Neurology, Children's Hospital of Philadelphia, Philadelphia, PA, USA.

<sup>5</sup> The Epilepsy NeuroGenetics Initiative (ENGIN), Children's Hospital of Philadelphia, Philadelphia, PA, USA.

<sup>6</sup> Department of Biomedical and Health Informatics (DBHi), Children's Hospital of Philadelphia, Philadelphia, PA, USA.

<sup>7</sup> Department of Neurology, University of Pennsylvania, Philadelphia, PA, USA.

<sup>8</sup> Interfaculty Institute for Biomedical Informatics (IBMI), University of Tuebingen, Tuebingen, Germany.

<sup>9</sup> Faculty of Medicine, University of Tuebingen, Tuebingen, Germany.

<sup>10</sup> German Center for Infection Research, Partner Site Tuebingen, Tuebingen, Germany.

\* To whom correspondence should be addressed:

Holger Lerche, Department of Neurology and Epileptology, Hertie Institute for Clinical Brain Research, University of Tuebingen, Hoppe-Seyley-Str. 3, D-72076 Tuebingen, Germany. Email: holger.lerche@med.uni-tuebingen.de

Nico Pfeifer, Methods in Medical Informatics, Department of Computer Science, University of Tuebingen, Sand 14, D-72076 Tuebingen, Germany. Email: pfeifer@informatik.uni-tuebingen.de

† These authors were equally contributing PIs of this work.

## Contents

|                                                                                                                                                             |    |
|-------------------------------------------------------------------------------------------------------------------------------------------------------------|----|
| <b>Supplementary Figure 1.</b> Functional variant density distribution                                                                                      | 1  |
| <b>Supplementary Figure 2.</b> Performance of simple algorithms and state-of-the-art algorithms that were used in previous work                             | 2  |
| <b>Supplementary Figure 3.</b> Graphical representation of nested k-fold cross-validation                                                                   | 3  |
| <b>Supplementary Figure 4.</b> Pseudocode representation of nested k-fold cross-validation                                                                  | 3  |
| <b>Supplementary Figure 5.</b> Task hierarchy and visualization of the task similarity matrix                                                               | 4  |
| <b>Supplementary Table 1.</b> List of features used in model training                                                                                       | 5  |
| <b>Supplementary Table 2.</b> Non-synonymous variants in voltage-gated potassium channels used in training and their overall effect on ion channel function | 11 |
| <b>Supplementary Table 3.</b> Predicted functional effect of 3760 known voltage-gated potassium channels missense variants                                  | 66 |

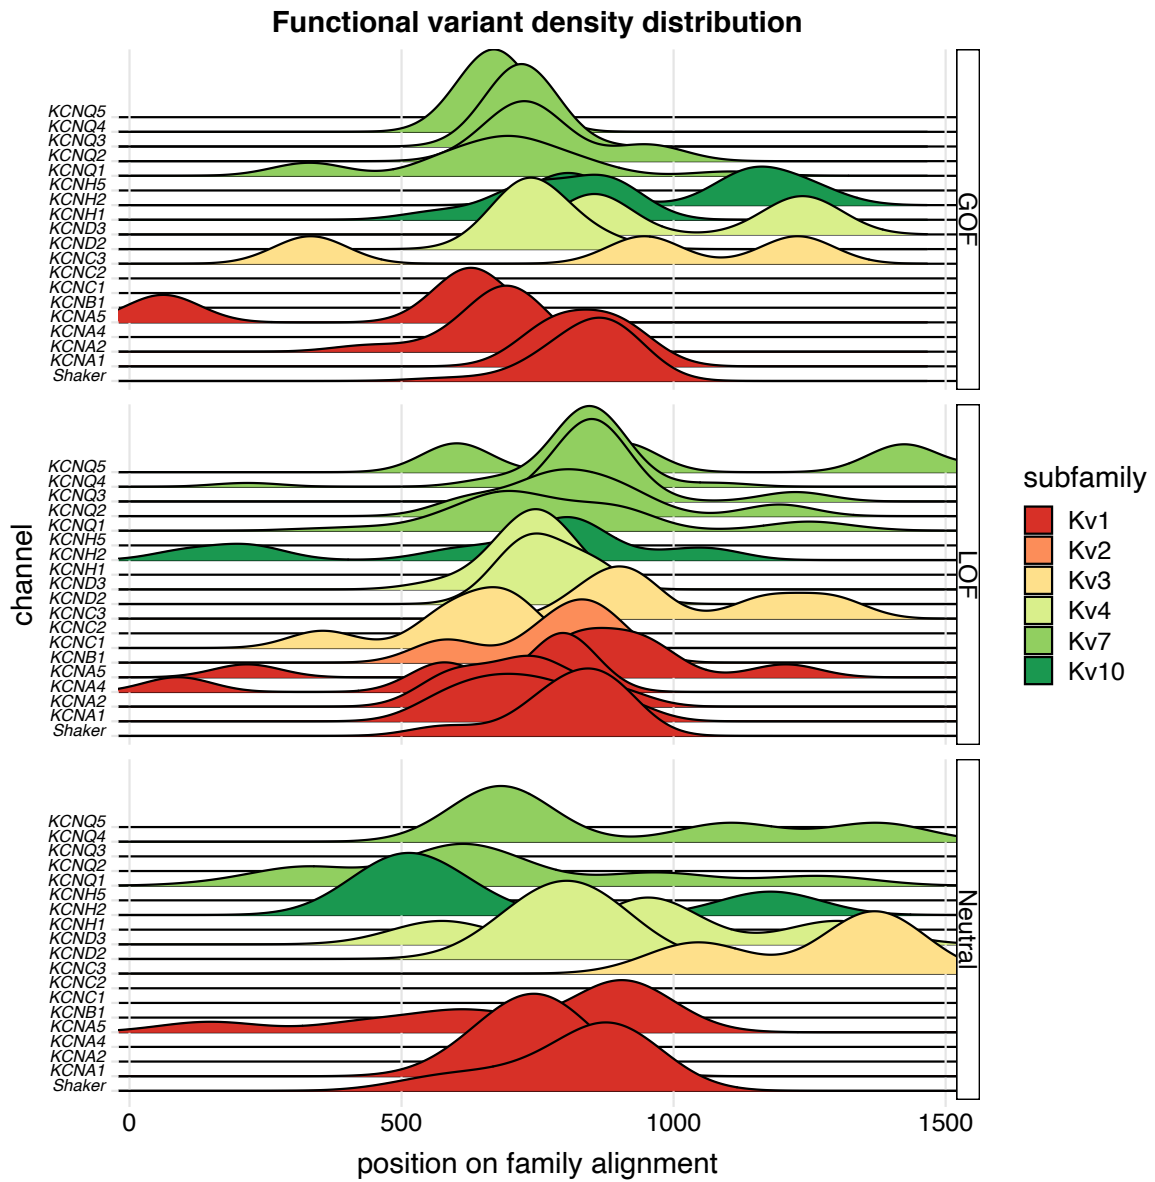

**Supplementary Figure 1.** Functional variant density distribution along the channel superfamily multiple sequence alignment. Variants are grouped by functional effect (GOF, LOF, and neutral) and coloured by channel subfamily membership.

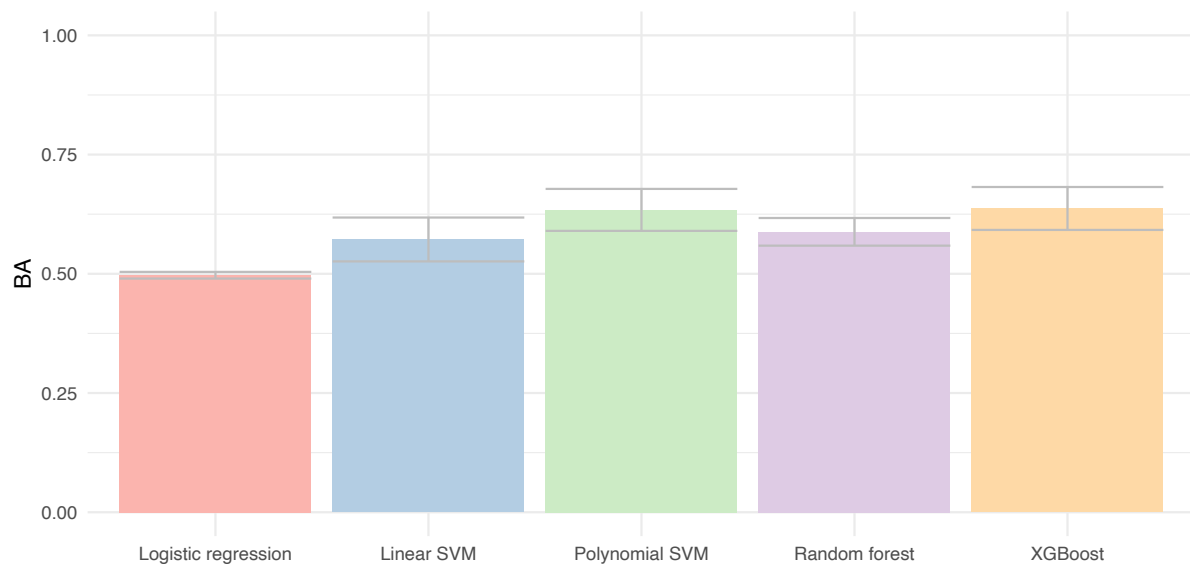

**Supplementary Figure 2.** Performance of simple algorithms (logistic regression) and state-of-the-art algorithms that were used in previous work (XGBoost).<sup>1</sup> Models were implemented through the tidymodels framework.<sup>2</sup> Model hyperparameter tuning and performance estimation were carried out with nested k-fold cross validation. Logistic regression, BA  $0.497 \pm 0.007$ . Linear SVM, BA  $0.572 \pm 0.046$ . Polynomial SVM, BA  $0.634 \pm 0.044$ . Random Forest, BA  $0.588 \pm 0.029$ . XGBoost, BA  $0.637 \pm 0.047$ . Abbreviations: BA – balanced accuracy.

#### References

1. Heyne HO, Baez-Nieto D, Iqbal S, et al. Predicting functional effects of missense variants in voltage-gated sodium and calcium channels. *Sci Transl Med* 2020; **12**(556).
2. Kuhn M, Wickham H. Tidymodels: a collection of packages for modeling and machine learning using tidyverse principles. <https://www.tidymodels.org>. 2020.

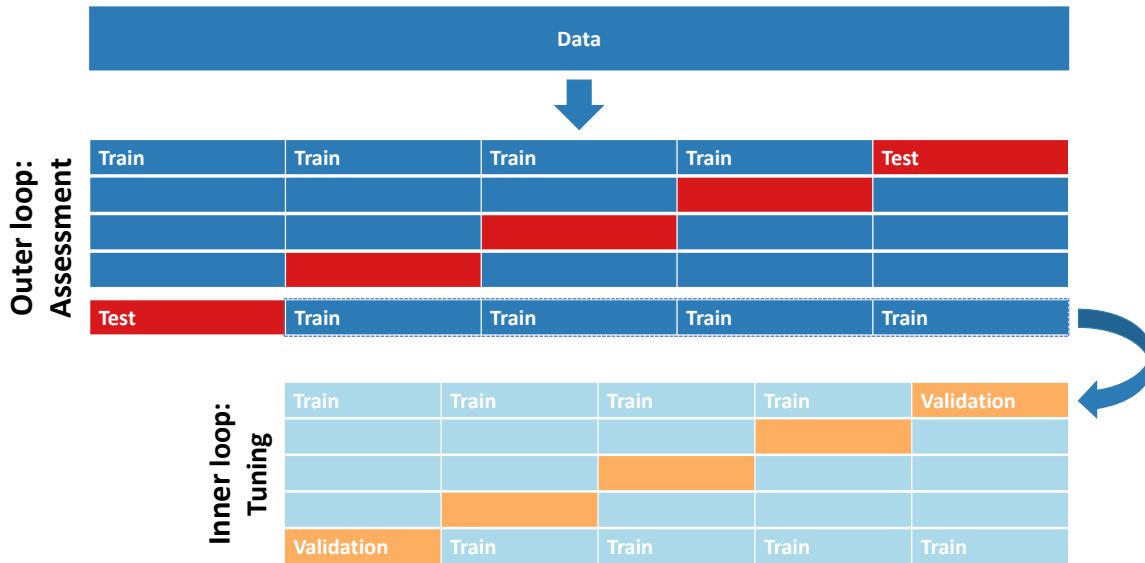

**Supplementary Figure 3.** Graphical representation of the nested k-fold cross-validation procedure used during model selection (hyperparameter tuning) and model assessment.

**Algorithm 1: Nested k-fold cross-validation**

**Input:** Data set  $S$ , set of hyperparameters  $C$

**Output:** Average error for best parameter combination

$K \leftarrow$  Randomly split  $S$  into  $outer\_folds$  folds

**FOR**  $i = 1$  **TO**  $outer\_folds$  *# outer loop*

$outer\_test \leftarrow k_i \in K$

$outer\_train \leftarrow K \setminus k_i$

**FOR** hyperparameter **IN**  $C$  *# inner loop*

$H \leftarrow$  Randomly split  $outer\_train$  into  $inner\_folds$  folds

**FOR**  $j = 1$  **TO**  $inner\_folds$

$inner\_test \leftarrow h_j \in H$

$inner\_train \leftarrow H \setminus h_j$

$model \leftarrow$  Train model on  $inner\_train$  with hyperparameter

$e_j \leftarrow$  Compute test error of model on  $inner\_test$

**ENDFOR**

$\bar{e} \leftarrow$  Compute average  $e_j$  ( $j = 1, 2, \dots, inner\_folds$ )

**ENDFOR**

$best\_hyperparameter \leftarrow$  select hyperparameter with minimum  $\bar{e}$

$model \leftarrow$  Train model with hyperparameter on  $outer\_train$

$f_i \leftarrow$  Compute test error of model on  $outer\_test$

**ENDFOR**

**RETURN**  $\bar{f} \leftarrow$  Compute average  $f_i$  ( $i = 1, 2, \dots, outer\_folds$ )

**Supplementary Figure 4.** Pseudocode representation of the nested k-fold cross-validation procedure used during model selection (hyperparameter tuning) and model assessment.

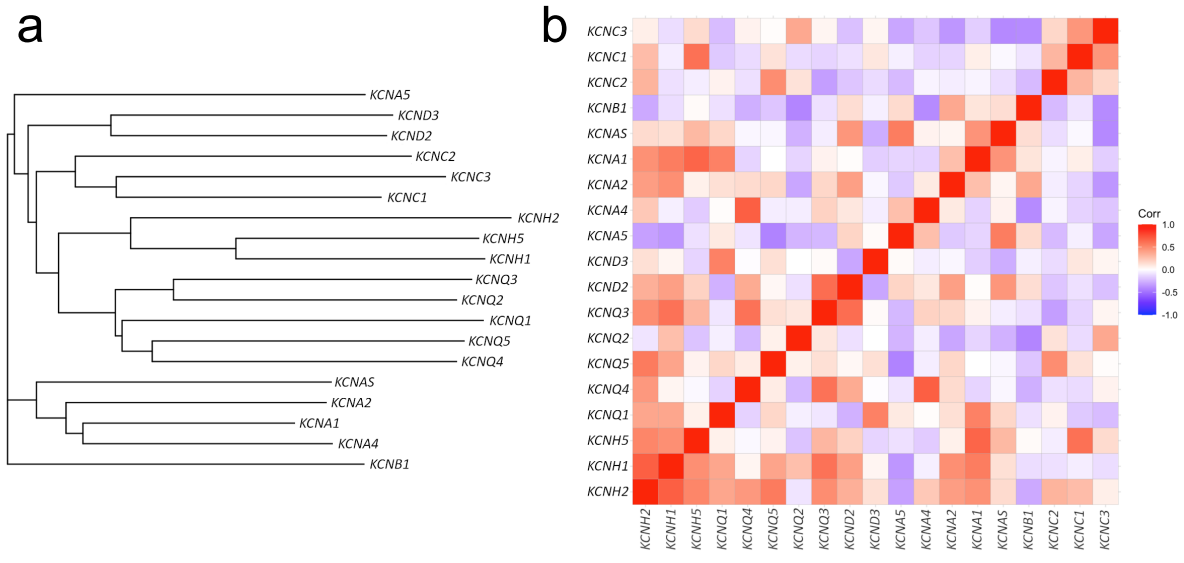

**Supplementary Figure 5.** *a*: Task hierarchy  $T$  derived from MUSCLE multiple sequence alignment. *b*: Visualization of the task similarity matrix  $K_t$  as a correlation plot, where positive values (shown in red) correspond to a lower pairwise distance and higher pairwise similarity, and vice versa.

| Feature            | Description                                                                                                                        | Data type | p <sub>GOF</sub> | p <sub>LOF</sub> | p <sub>Neutral</sub> | Reference    |
|--------------------|------------------------------------------------------------------------------------------------------------------------------------|-----------|------------------|------------------|----------------------|--------------|
| aa_blosum62        | amino acid substitution value according to the midrange Blocks Substitution Matrix (BLOSUM62)                                      | numerical | 0.495            | <b>0.020</b>     | <b>0.029</b>         | <sup>1</sup> |
| aa_blomap_aa1_dim1 | encoding of the physicochemical properties of the original amino acid using a Naïve Bayes classifier, first encoding dimension     | numerical | 0.955            | 0.858            | 0.495                | <sup>2</sup> |
| aa_blomap_aa1_dim2 | encoding of the physicochemical properties of the original amino acid using a Naïve Bayes classifier, second encoding dimension    | numerical | 0.879            | 0.408            | 0.449                | <sup>2</sup> |
| aa_blomap_aa1_dim3 | encoding of the physicochemical properties of the original amino acid using a Naïve Bayes classifier, third encoding dimension     | numerical | 0.879            | 0.655            | 0.919                | <sup>2</sup> |
| aa_blomap_aa1_dim4 | encoding of the physicochemical properties of the original amino acid using a Naïve Bayes classifier, fourth encoding dimension    | numerical | 0.879            | 0.323            | 0.367                | <sup>2</sup> |
| aa_blomap_aa1_dim5 | encoding of the physicochemical properties of the original amino acid using a Naïve Bayes classifier, fifth encoding dimension     | numerical | 0.910            | 0.651            | 0.840                | <sup>2</sup> |
| aa_blomap_aa2_dim1 | encoding of the physicochemical properties of the substituted amino acid using a Naïve Bayes classifier, first encoding dimension  | numerical | 0.980            | 0.907            | 0.670                | <sup>2</sup> |
| aa_blomap_aa2_dim2 | encoding of the physicochemical properties of the substituted amino acid using a Naïve Bayes classifier, second encoding dimension | numerical | 0.897            | 0.458            | 0.488                | <sup>2</sup> |
| aa_blomap_aa2_dim3 | encoding of the physicochemical properties of the substituted amino acid using a Naïve Bayes classifier, third encoding dimension  | numerical | 0.910            | 0.614            | 0.703                | <sup>2</sup> |
| aa_blomap_aa2_dim4 | encoding of the physicochemical properties of the substituted amino acid using a Naïve Bayes classifier, fourth encoding dimension | numerical | 0.910            | 0.648            | 0.110                | <sup>2</sup> |
| aa_blomap_aa2_dim5 | encoding of the physicochemical properties of the substituted amino acid using a Naïve Bayes classifier, fifth encoding dimension  | numerical | 0.505            | 0.161            | 0.421                | <sup>2</sup> |
| aa_braun_aa1_E1    | encoding of the physicochemical properties of the original amino acid using multidimensional scaling, first encoding dimension     | numerical | 0.989            | 0.931            | 0.762                | <sup>3</sup> |
| aa_braun_aa1_E2    | encoding of the physicochemical properties of the original amino acid using multidimensional scaling, second encoding dimension    | numerical | 0.997            | 0.537            | 0.231                | <sup>3</sup> |
| aa_braun_aa1_E3    | encoding of the physicochemical properties of the original amino acid using multidimensional scaling, third encoding dimension     | numerical | 0.997            | 0.968            | 0.941                | <sup>3</sup> |
| aa_braun_aa1_E4    | encoding of the physicochemical properties of the original amino acid using multidimensional scaling, fourth encoding dimension    | numerical | 0.910            | 0.740            | 0.941                | <sup>3</sup> |
| aa_braun_aa1_E5    | encoding of the physicochemical properties of the original amino acid using multidimensional scaling, fifth encoding dimension     | numerical | 0.669            | 0.651            | 0.919                | <sup>3</sup> |
| aa_braun_aa2_E1    | encoding of the physicochemical properties of the substituted amino acid using multidimensional scaling, first encoding dimension  | numerical | 0.712            | 0.305            | 0.423                | <sup>3</sup> |
| aa_braun_aa2_E2    | encoding of the physicochemical properties of the substituted amino acid using multidimensional scaling, second encoding dimension | numerical | 0.578            | 0.931            | 0.137                | <sup>3</sup> |
| aa_braun_aa2_E3    | encoding of the physicochemical properties of the substituted amino acid using multidimensional scaling, third encoding dimension  | numerical | 0.381            | 0.072            | 0.386                | <sup>3</sup> |
| aa_braun_aa2_E4    | encoding of the physicochemical properties of the substituted amino acid using multidimensional scaling, fourth encoding dimension | numerical | 0.955            | 0.931            | 0.623                | <sup>3</sup> |

|                 |                                                                                                                                      |           |       |                  |                  |                 |
|-----------------|--------------------------------------------------------------------------------------------------------------------------------------|-----------|-------|------------------|------------------|-----------------|
| aa_braun_aa2_E5 | encoding of the physicochemical properties of the substituted amino acid using multidimensional scaling, fifth encoding dimension    | numerical | 0.669 | 0.648            | 0.931            | <sup>3</sup>    |
| aa_grantham     | Grantham distance between the original and substituted amino acids, based on composition, polarity and residue volume                | numerical | 0.955 | 0.502            | 0.066            | <sup>4</sup>    |
| aa_hphob_pca1   | change in hydrophobicity by amino acid substitution using 98 hydrophobicity scales and principal component analysis, first component | numerical | 0.955 | 0.740            | 0.794            | <sup>5</sup>    |
| aa_hphob_pca2   | change in hydrophobicity by amino acid substitution using 98 hydrophobicity scales and principal component analysis, first component | numerical | 0.980 | 0.621            | 0.442            | <sup>5</sup>    |
| aa_hphob_pca3   | change in hydrophobicity by amino acid substitution using 98 hydrophobicity scales and principal component analysis, first component | numerical | 0.980 | 0.855            | 0.873            | <sup>5</sup>    |
| str_np_rsa      | change in residue relative accessible surface area predicted by NetSurfP – 2.0                                                       | numerical | 0.381 | <b>&lt;0.001</b> | <b>&lt;0.001</b> | <sup>6</sup>    |
| str_np_asa      | change in residue accessible surface area predicted by NetSurfP – 2.0                                                                | numerical | 0.381 | <b>0.012</b>     | 0.054            | <sup>6</sup>    |
| str_paraz       | amino acid conservation across gene paralogs (Parazscore)                                                                            | numerical | 0.076 | <b>0.017</b>     | 0.832            | <sup>7</sup>    |
| str_iupred      | energy estimation-based structural state prediction for ordered and disordered residues by IUPred2                                   | numerical | 0.989 | 0.059            | <b>&lt;0.001</b> | <sup>8</sup>    |
| str_anchor      | energy estimation-based structural state prediction for disordered binding regions by ANCHOR2                                        | numerical | 0.669 | <b>0.012</b>     | <b>0.002</b>     | <sup>8</sup>    |
| str_asa         | change in residue accessible surface area predicted by PROF via PredictProtein                                                       | numerical | 0.997 | 0.858            | 0.747            | <sup>9</sup>    |
| str_rsa         | change in residue relative accessible surface area predicted by PROF via PredictProtein                                              | numerical | 0.955 | 0.931            | 0.595            | <sup>9</sup>    |
| str_helix       | prediction of topology for helical transmembrane proteins by PHDhtm_top via PredictProtein, network output for helix                 | numerical | 0.796 | 0.305            | <b>0.001</b>     | <sup>9</sup>    |
| str_loop        | prediction of topology for helical transmembrane proteins by PHDhtm_top via PredictProtein, network output for loop                  | numerical | 0.780 | 0.310            | <b>0.001</b>     | <sup>9</sup>    |
| str_nors        | prediction of protein disorder by NORSnet via PredictProtein                                                                         | numerical | 0.879 | 0.261            | <b>0.001</b>     | <sup>9,10</sup> |
| str_profval     | prediction of protein disorder by PROFbval via PredictProtein                                                                        | numerical | 0.414 | <b>0.002</b>     | <b>0.001</b>     | <sup>9,11</sup> |
| str_ucon        | prediction of protein disorder by Ucon via PredictProtein                                                                            | numerical | 0.268 | 0.323            | <b>&lt;0.001</b> | <sup>9,12</sup> |
| str_isis        | prediction of residue involvement in protein-protein interaction sites by ISIS                                                       | numerical | 0.381 | <b>&lt;0.001</b> | <b>&lt;0.001</b> | <sup>13</sup>   |
| str_consurf     | probabilistic positional evolutionary conservation estimates by ConSurf via PredictProtein                                           | numerical | 0.505 | <b>0.002</b>     | <b>&lt;0.001</b> | <sup>9,14</sup> |
| ecdf            | relative variant position along sequence length (empirical distribution function)                                                    | numerical | 0.268 | 0.124            | 0.941            | –               |

|                       |                                                                                                                                          |             |              |              |                  |       |
|-----------------------|------------------------------------------------------------------------------------------------------------------------------------------|-------------|--------------|--------------|------------------|-------|
| cid                   | relative variant position on the gene family multiple sequence alignment via MUSCLE with UpgmaMax clustering                             | numerical   | 0.712        | 0.855        | 0.641            | 15    |
| str_pbie_b            | state of residue relative accessible surface area predicted by PROF via PredictProtein, buried                                           | categorical | 0.955        | 0.561        | 0.451            | 9,11  |
| str_pbie_e            | state of residue relative accessible surface area predicted by PROF via PredictProtein, exposed                                          | categorical | 0.997        | 0.655        | 0.423            | 9,11  |
| str_pbie_i            | state of residue relative accessible surface area predicted by PROF via PredictProtein, intermediate                                     | categorical | 0.980        | 0.430        | 0.200            | 9,11  |
| str_prhl_H            | maximum score model prediction of topology for helical transmembrane proteins by PHDhtm_top via PredictProtein, helical membrane         | categorical | 0.967        | 0.716        | 0.363            | 9     |
| str_prhl_L            | maximum score model prediction of topology for helical transmembrane proteins by PHDhtm_top via PredictProtein, no helical transmembrane | categorical | 0.967        | 0.716        | 0.363            | 9     |
| str_pito_i            | predicted topology of transmembrane regions by PHDhtm_top via PredictProtein, loop inside                                                | categorical | 0.505        | <b>0.014</b> | <b>0.010</b>     | 9     |
| str_pito_o            | predicted topology of transmembrane regions by PHDhtm_top via PredictProtein, loop outside                                               | categorical | 0.394        | 0.053        | 0.190            | 9     |
| str_pito_T            | predicted topology of transmembrane regions by PHDhtm_top via PredictProtein, transmembrane                                              | categorical | 0.967        | 0.716        | 0.363            | 9     |
| str_top_cytoplasmic   | position on protein topology via UniProt, cytoplasmic                                                                                    | categorical | 0.997        | <b>0.009</b> | <b>&lt;0.001</b> | 16    |
| str_top_extracellular | position on protein topology via UniProt, cytoplasmic                                                                                    | categorical | 0.952        | 0.609        | 0.592            | 16    |
| str_top_porehelix     | position on protein topology via UniProt, cytoplasmic                                                                                    | categorical | 0.268        | <b>0.002</b> | <b>0.029</b>     | 16    |
| str_top_S1            | position on protein topology via UniProt, segment S1                                                                                     | categorical | 0.381        | 0.931        | 0.106            | 16    |
| str_top_S2            | position on protein topology via UniProt, segment S2                                                                                     | categorical | 0.381        | 0.323        | 0.994            | 16    |
| str_top_S3            | position on protein topology via UniProt, segment S3                                                                                     | categorical | 0.935        | 0.968        | 0.623            | 16    |
| str_top_S4            | position on protein topology via UniProt, segment S4                                                                                     | categorical | 0.381        | 0.949        | <b>0.048</b>     | 16    |
| str_top_S5            | position on protein topology via UniProt, segment S5                                                                                     | categorical | 0.669        | 0.124        | 0.200            | 16    |
| str_top_S6            | position on protein topology via UniProt, segment S6                                                                                     | categorical | <b>0.009</b> | 0.117        | 0.114            | 16    |
| str_exp_calmodulin    | expert and literature-based annotation of variant position within functional domains or motifs, calmodulin binding site                  | categorical | 0.955        | 0.848        | 0.941            | 17-26 |
| str_exp_gating        | expert and literature-based annotation of variant position within functional domains or motifs, gating charges or countercharges         | categorical | 0.381        | 0.957        | 0.085            |       |



|                           |                                                                                                                       |             |       |                  |                  |      |
|---------------------------|-----------------------------------------------------------------------------------------------------------------------|-------------|-------|------------------|------------------|------|
| str_exp_none              | expert and literature-based annotation of variant position within functional domains or motifs, none                  | categorical | 0.381 | 0.968            | <b>0.023</b>     |      |
| str_exp_pvp               | expert and literature-based annotation of variant position within functional domains or motifs, PVP motif             | categorical | 0.381 | 0.813            | 0.229            |      |
| str_exp_S4S5linker        | expert and literature-based annotation of variant position within functional domains or motifs, S4-S5 linker          | categorical | 0.505 | 0.502            | 0.941            |      |
| str_exp_selectivityfilter | expert and literature-based annotation of variant position within functional domains or motifs, selectivity filter    | categorical | 0.381 | 0.059            | 0.328            |      |
| str_exp_selfassociation   | expert and literature-based annotation of variant position within functional domains or motifs, self-association site | categorical | 0.381 | 0.322            | 0.873            |      |
| str_np_q3_C               | 3-class secondary structure classification (SS3) by NetSurfP – 2.0 and DSSP                                           | categorical | 0.952 | <b>0.012</b>     | <b>&lt;0.001</b> | 6,27 |
| str_np_q3_E               | 3-class secondary structure classification (SS3) by NetSurfP – 2.0 and DSSP                                           | categorical | 0.381 | 0.117            | 0.488            | 6,27 |
| str_np_q3_H               | 3-class secondary structure classification (SS3) by NetSurfP – 2.0 and DSSP                                           | categorical | 0.997 | 0.053            | <b>&lt;0.001</b> | 6,27 |
| str_np_q8_B               | 8-class secondary structure classification (SS8) by NetSurfP – 2.0 and DSSP                                           | categorical | 0.997 | 0.813            | 0.603            | 6,27 |
| str_np_q8_C               | 8-class secondary structure classification (SS8) by NetSurfP – 2.0 and DSSP                                           | categorical | 0.405 | <b>&lt;0.001</b> | <b>&lt;0.001</b> | 6,27 |
| str_np_q8_E               | 8-class secondary structure classification (SS8) by NetSurfP – 2.0 and DSSP                                           | categorical | 0.381 | 0.470            | 0.623            | 6,27 |
| str_np_q8_G               | 8-class secondary structure classification (SS8) by NetSurfP – 2.0 and DSSP                                           | categorical | 0.450 | 0.502            | 0.873            | 6,27 |
| str_np_q8_H               | 8-class secondary structure classification (SS8) by NetSurfP – 2.0 and DSSP                                           | categorical | 0.910 | 0.083            | <b>&lt;0.001</b> | 6,27 |
| str_np_q8_I               | 8-class secondary structure classification (SS8) by NetSurfP – 2.0 and DSSP                                           | categorical | 0.935 | 0.072            | <b>0.010</b>     | 6,27 |
| str_np_q8_S               | 8-class secondary structure classification (SS8) by NetSurfP – 2.0 and DSSP                                           | categorical | 0.709 | 0.619            | 0.992            | 6,27 |
| str_np_q8_T               | 8-class secondary structure classification (SS8) by NetSurfP – 2.0 and DSSP                                           | categorical | 0.381 | 0.074            | 0.387            | 6,27 |

**Supplementary Table 1:** List of features used in model training, sorted by name and appearance in the training data set. Group differences were compared using the Wilcoxon–Mann–Whitney test two-sample test, with a one-versus-all approach for three classes. p-values were adjusted for multiple comparisons using the Benjamini-Hochberg method. Significant p-values after correction are shown in bold and indicate a non-directional difference in group distribution (i.e., a discriminative feature).

## References

1. Henikoff S, Henikoff JG. Amino acid substitution matrices from protein blocks. *Proc Natl Acad Sci U S A* 1992; **89**(22): 10915-9.
2. Stefan Maetschke MT, Mikael Bodén. BLOMAP: An Encoding of Amino Acids which Improves Signal Peptide Cleavage Site Prediction: College Press; 2005.
3. Venkatarajan MS, Braun W. New quantitative descriptors of amino acids based on multidimensional scaling of a large number of physical–chemical properties. *Molecular modeling annual* 2001; **7**(12): 445-53.
4. Grantham R. Amino acid difference formula to help explain protein evolution. *Science* 1974; **185**(4154): 862-4.
5. Simm S, Einloft J, Mirus O, Schleiff E. 50 years of amino acid hydrophobicity scales: revisiting the capacity for peptide classification. *Biol Res* 2016; **49**(1): 31.
6. Klausen MS, Jespersen MC, Nielsen H, et al. NetSurfP-2.0: Improved prediction of protein structural features by integrated deep learning. *Proteins* 2019; **87**(6): 520-7.
7. Lal D, May P, Perez-Palma E, et al. Gene family information facilitates variant interpretation and identification of disease-associated genes in neurodevelopmental disorders. *Genome Med* 2020; **12**(1): 28.
8. Meszaros B, Erdos G, Dosztanyi Z. IUPred2A: context-dependent prediction of protein disorder as a function of redox state and protein binding. *Nucleic Acids Res* 2018; **46**(W1): W329-W37.
9. Bernhofer M, Dallago C, Karl T, et al. PredictProtein - Predicting Protein Structure and Function for 29 Years. *Nucleic Acids Res* 2021; **49**(W1): W535-W40.
10. Schlessinger A, Liu J, Rost B. Natively unstructured loops differ from other loops. *PLoS Comput Biol* 2007; **3**(7): e140.
11. Schlessinger A, Yachdav G, Rost B. PROFbval: predict flexible and rigid residues in proteins. *Bioinformatics* 2006; **22**(7): 891-3.
12. Schlessinger A, Punta M, Rost B. Natively unstructured regions in proteins identified from contact predictions. *Bioinformatics* 2007; **23**(18): 2376-84.
13. Ofran Y, Rost B. ISIS: interaction sites identified from sequence. *Bioinformatics* 2007; **23**(2): e13-6.
14. Ashkenazy H, Abadi S, Martz E, et al. ConSurf 2016: an improved methodology to estimate and visualize evolutionary conservation in macromolecules. *Nucleic Acids Res* 2016; **44**(W1): W344-50.
15. Edgar RC. MUSCLE: a multiple sequence alignment method with reduced time and space complexity. *BMC Bioinformatics* 2004; **5**: 113.
16. Apweiler R, Bairoch A, Wu CH, et al. UniProt: the Universal Protein knowledgebase. *Nucleic Acids Res* 2004; **32**(Database issue): D115-9.
17. Alaimo A, Villarroel A. Calmodulin: A Multitasking Protein in Kv7.2 Potassium Channel Functions. *Biomolecules* 2018; **8**(3).
18. Kim DM, Nimigeon CM. Voltage-Gated Potassium Channels: A Structural Examination of Selectivity and Gating. *Cold Spring Harb Perspect Biol* 2016; **8**(5).
19. Delemotte L, Treptow W, Klein ML, Tarek M. Effect of sensor domain mutations on the properties of voltage-gated ion channels: molecular dynamics studies of the potassium channel Kv1.2. *Biophys J* 2010; **99**(9): L72-4.
20. Imbrici P, Grottesi A, D'Adamo MC, Mannucci R, Tucker SJ, Pessia M. Contribution of the central hydrophobic residue in the PXP motif of voltage-dependent K<sup>+</sup> channels to S6 flexibility and gating properties. *Channels (Austin)* 2009; **3**(1): 39-45.
21. Haitin Y, Attali B. The C-terminus of Kv7 channels: a multifunctional module. *J Physiol* 2008; **586**(7): 1803-10.
22. Chanda B, Asamoah OK, Blunck R, Roux B, Bezanilla F. Gating charge displacement in voltage-gated ion channels involves limited transmembrane movement. *Nature* 2005; **436**(7052): 852-6.
23. Treptow W, Mairret B, Chipot C, Tarek M. Coupled motions between pore and voltage-sensor domains: a model for Shaker B, a voltage-gated potassium channel. *Biophys J* 2004; **87**(4): 2365-79.
24. Shrivastava IH, Durell SR, Guy HR. A model of voltage gating developed using the KvAP channel crystal structure. *Biophys J* 2004; **87**(4): 2255-70.

25. Jensen MO, Jogini V, Borhani DW, Leffler AE, Dror RO, Shaw DE. Mechanism of voltage gating in potassium channels. *Science* 2012; **336**(6078): 229-33.
26. Jensen MO, Borhani DW, Lindorff-Larsen K, et al. Principles of conduction and hydrophobic gating in K<sup>+</sup> channels. *Proc Natl Acad Sci U S A* 2010; **107**(13): 5833-8.

27. Kabsch W, Sander C. Dictionary of protein secondary structure: pattern recognition of hydrogen-bonded and geometrical features. *Biopolymers* 1983; **22**(12): 2577-637.

| Gene         | Original amino acid | Position | Substituted amino acid | Net overall change in biophysical function | Change in voltage-dependence of activation [ $\Delta V_{1/2}$ , mV] | Change in slope factor of activation [ $\Delta k$ ] | Change in time constant of deactivation [ $\Delta\tau$ , ms] | Change in slope factor of (fast) inactivation [ $\Delta k$ ] | Change in voltage-dependence of (fast) inactivation [ $\Delta V_{1/2}$ , mV] | Change in amplitude of peak current or conductance [nS, pA/pF] | Loss of cell current (total loss-of-function) | Change in expression level | Comment                                | DOI                                                      |
|--------------|---------------------|----------|------------------------|--------------------------------------------|---------------------------------------------------------------------|-----------------------------------------------------|--------------------------------------------------------------|--------------------------------------------------------------|------------------------------------------------------------------------------|----------------------------------------------------------------|-----------------------------------------------|----------------------------|----------------------------------------|----------------------------------------------------------|
| <i>KCNA1</i> | A                   | 242      | P                      | LOF                                        | -4.8                                                                | -0.4                                                | 4.2                                                          |                                                              |                                                                              | 0                                                              |                                               | none                       |                                        | 10.1002/1531-8249(200010)48:4<647::AID-ANA12>3.0.CO;2-Q. |
| <i>KCNA1</i> | A                   | 395      | L                      | LOF                                        | 3                                                                   |                                                     |                                                              |                                                              |                                                                              |                                                                |                                               |                            |                                        | 10.1113/jphysiol.2009.174730                             |
| <i>KCNA1</i> | C                   | 185      | W                      | LOF                                        | 61.2                                                                |                                                     |                                                              |                                                              |                                                                              | -41                                                            |                                               | none                       | faster recovery from slow inactivation | 10.3389/fphys.2014.00525                                 |
| <i>KCNA1</i> | C                   | 185      | W                      | LOF                                        | 0.8                                                                 | -1.8                                                |                                                              |                                                              |                                                                              | -35                                                            |                                               |                            |                                        | 10.1136/jnnp-2012-304131                                 |
| <i>KCNA1</i> | E                   | 283      | K                      | LOF                                        | 4.4                                                                 | 1.6                                                 | 3.5                                                          |                                                              |                                                                              | 49                                                             |                                               |                            | slower activation                      | 10.1016/j.mcn.2017.06.006                                |
| <i>KCNA1</i> | E                   | 325      | D                      | LOF                                        | 60.4                                                                | 9.4                                                 | -19.3                                                        |                                                              |                                                                              | -0.96                                                          |                                               | reduced                    |                                        | 10.1523/JNEUROSCI.18-08-02842.1998                       |
| <i>KCNA1</i> | E                   | 325      | D                      | LOF                                        | 21.8                                                                | 4.3                                                 | 19.9                                                         |                                                              |                                                                              |                                                                |                                               |                            |                                        | 10.1096/fasebj.13.11.1335                                |
| <i>KCNA1</i> | F                   | 184      | C                      | LOF                                        | 28                                                                  | 0                                                   | 6                                                            |                                                              |                                                                              | -2.5                                                           |                                               | reduced                    | normal tau of inactivation             | 10.1096/fasebj.13.11.1335                                |
| <i>KCNA1</i> | F                   | 184      | C                      | LOF                                        | 25.9                                                                | -1                                                  | 4.6                                                          |                                                              |                                                                              | -0.85                                                          |                                               |                            |                                        | 10.1523/JNEUROSCI.18-08-02842.1998                       |
| <i>KCNA1</i> | F                   | 232      | L                      | LOF                                        | 3                                                                   |                                                     |                                                              |                                                              |                                                                              |                                                                |                                               |                            |                                        | 10.1113/jphysiol.2009.174730                             |
| <i>KCNA1</i> | F                   | 249      | C                      | LOF                                        | 0                                                                   |                                                     |                                                              |                                                              |                                                                              | -2                                                             |                                               | reduced                    |                                        | 10.1007/s10048-016-0486-0                                |
| <i>KCNA1</i> | F                   | 249      | I                      | LOF                                        | -0.6                                                                | -1.9                                                | 21.9                                                         |                                                              |                                                                              | -0.99                                                          |                                               | reduced                    |                                        | 10.1523/JNEUROSCI.18-08-02842.1998                       |
| <i>KCNA1</i> | F                   | 303      | V                      | LOF                                        | 12                                                                  | 3                                                   | -4                                                           | 1                                                            | 4                                                                            | -6.3                                                           |                                               |                            |                                        | 10.1038/s41598-017-03041-z                               |
| <i>KCNA1</i> | F                   | 411      | L                      | LOF                                        |                                                                     |                                                     |                                                              |                                                              |                                                                              |                                                                |                                               | not expressed              |                                        | 10.1113/jphysiol.2009.174730                             |

|       |   |     |   |         |      |     |      |      |     |       |  |               |                                                        |                                    |
|-------|---|-----|---|---------|------|-----|------|------|-----|-------|--|---------------|--------------------------------------------------------|------------------------------------|
| KCNAI | F | 411 | Y | LOF     |      |     |      |      |     |       |  | not expressed |                                                        | 10.1113/jphysiol.2009.174730       |
| KCNAI | F | 414 | C | Mixed   | 2.2  | 1.3 | -2.3 |      |     | -0.7  |  |               | Faster recovery from inactivation, faster inactivation | 10.1016/j.neuroscience.2008.09.022 |
| KCNAI | F | 414 | L | GOF     | -17  |     |      |      |     |       |  |               | Two phases in the I-V curve                            | 10.1113/jphysiol.2009.174730       |
| KCNAI | F | 414 | S | LOF     | 14.9 |     |      |      |     | -79.9 |  | none          | Two phases in the I-V curve                            | 10.1212/WNL.0b013e3181ea9ee3       |
| KCNAI | F | 414 | Y | LOF     | 13   |     |      |      |     |       |  |               | Two phases in the I-V curve                            | 10.1113/jphysiol.2009.174730       |
| KCNAI | G | 311 | D | LOF     |      |     |      |      |     | -0.5  |  | reduced       |                                                        | 10.3389/fneur.2018.00587           |
| KCNAI | G | 311 | S | LOF     | 31.7 | 5.3 | -0.4 |      |     | -0.75 |  | reduced       |                                                        | 10.1016/S0014-5793(98)00814-X      |
| KCNAI | G | 316 | A | Neutral | 0    |     |      |      |     |       |  |               |                                                        | 10.1113/jphysiol.2009.174730       |
| KCNAI | I | 177 | L | LOF     |      |     |      |      |     | -0.92 |  | increased     |                                                        | 10.1074/jbc.274.17.11487.          |
| KCNAI | I | 177 | N | LOF     | 59   | 1.7 | -28  |      |     | -0.94 |  |               |                                                        | 10.1007/s00424-002-0962-2          |
| KCNAI | I | 177 | P | LOF     |      |     |      |      |     | -0.06 |  | reduced       |                                                        | 10.1074/jbc.274.17.11487.          |
| KCNAI | I | 177 | R | LOF     |      |     |      |      |     | -0.97 |  |               |                                                        | 10.1074/jbc.274.17.11487.          |
| KCNAI | I | 262 | L | LOF     |      |     |      |      |     | -2.67 |  | increased     |                                                        | 10.1016/j.abb.2012.05.006          |
| KCNAI | I | 262 | M | LOF     |      |     |      |      |     | -172  |  | none          |                                                        | 10.1002/mus.24242                  |
| KCNAI | I | 262 | T | LOF     | 12.8 | 1.1 |      | -0.3 | 9.5 | -1.95 |  | reduced       |                                                        | 10.1038/srep19378                  |
| KCNAI | I | 262 | T | LOF     | 12.8 | 1.1 |      | -0.3 | 9.5 | -1.95 |  | reduced       |                                                        | 10.1016/j.abb.2012.05.006          |
| KCNAI | I | 314 | L | LOF     |      |     |      |      |     |       |  | not expressed |                                                        | 10.1113/jphysiol.2009.174730       |
| KCNAI | I | 330 | V | LOF     | 4    |     |      |      |     |       |  |               |                                                        | 10.1113/jphysiol.2009.174730       |
| KCNAI | I | 400 | V | GOF     |      |     |      |      |     |       |  |               | 20fold increase in recovery rate                       | 10.1038/nsmb825                    |
| KCNAI | I | 407 | L | LOF     | 52   |     |      |      |     |       |  |               |                                                        | 10.1113/jphysiol.2009.174730       |
| KCNAI | I | 407 | M | LOF     | 21.4 |     |      |      |     | -32.7 |  |               |                                                        | 10.1136/jnnp-2012-304131           |
| KCNAI | L | 305 | I | LOF     | 53   |     |      |      |     |       |  |               |                                                        | 10.1113/jphysiol.2009.174730       |
| KCNAI | L | 312 | M | LOF     | 12   |     |      |      |     |       |  |               |                                                        | 10.1113/jphysiol.2009.174730       |

|       |   |     |   |         |       |      |     |   |       |         |  |               |                   |                                                         |
|-------|---|-----|---|---------|-------|------|-----|---|-------|---------|--|---------------|-------------------|---------------------------------------------------------|
| KCNAI | L | 315 | V | LOF     | 9     |      |     |   |       |         |  |               |                   | 10.1113/jphysiol.2009.174730                            |
| KCNAI | L | 319 | R | LOF     | 12    | 0    |     | 0 | 21.5  | -140.3  |  |               |                   | 10.1093/hmg/ddx430                                      |
| KCNAI | L | 319 | V | GOF     | -4    | 0    |     |   |       |         |  |               |                   | 10.1113/jphysiol.2009.174730                            |
| KCNAI | L | 326 | V | GOF     | -23   |      |     |   |       |         |  |               |                   | 10.1113/jphysiol.2009.174730                            |
| KCNAI | L | 328 | V | LOF     |       |      |     |   |       | -209    |  | none          |                   | 10.1159/000488954                                       |
| KCNAI | L | 329 | I | LOF     |       |      |     |   |       |         |  |               |                   | 10.1016/j.abb.2012.05.006                               |
| KCNAI | L | 329 | V | Unclear |       |      |     |   |       |         |  |               | does not saturate | 10.1113/jphysiol.2009.174730                            |
| KCNAI | L | 333 | V | GOF     | -10   |      |     |   |       |         |  |               |                   | 10.1113/jphysiol.2009.174730                            |
| KCNAI | L | 398 | A | LOF     |       |      |     |   |       |         |  | not expressed |                   | 10.1113/jphysiol.2009.174730                            |
| KCNAI | M | 323 | L | Neutral | 0     | 0    |     |   |       |         |  |               |                   | 10.1113/jphysiol.2009.174730                            |
| KCNAI | N | 255 | A | Mixed   | -12.1 | 1.6  |     |   | -13.2 |         |  |               |                   | 10.1074/jbc.M109.041517                                 |
| KCNAI | N | 255 | D | LOF     | 31    |      |     |   |       | -326    |  | none          |                   | 10.1172/JCI36948                                        |
| KCNAI | N | 255 | E | LOF     |       |      |     |   |       |         |  |               |                   | 10.1074/jbc.M109.041517                                 |
| KCNAI | N | 255 | H | Mixed   | -4.4  | 0.2  |     |   | -6.1  |         |  |               |                   | 10.1074/jbc.M109.041517                                 |
| KCNAI | N | 255 | K | LOF     | 24    | 0    |     | 0 | -22   | -124.66 |  |               |                   | 10.1093/hmg/ddx430                                      |
| KCNAI | N | 255 | Q | LOF     |       |      |     |   |       |         |  | no current    |                   | 10.1074/jbc.M109.041517                                 |
| KCNAI | N | 255 | T | Mixed   | -21.1 | -0.9 |     |   | -13.4 |         |  |               |                   | 10.1074/jbc.M109.041517                                 |
| KCNAI | N | 255 | V | Mixed   | -16.1 | 1.8  |     |   | -13.3 |         |  |               |                   | 10.1074/jbc.M109.041517                                 |
| KCNAI | P | 244 | H | Neutral | -0.7  | 0.3  | 0.7 |   |       | 0       |  | none          |                   | 10.1002/1531-8249(200010)48:4<647::AID-ANA12>3.0.CO;2-Q |
| KCNAI | R | 167 | M | LOF     | 55.6  |      |     |   |       | -41.6   |  | none          |                   | 10.1136/jnnp-2012-304131                                |
| KCNAI | R | 239 | S | LOF     |       |      |     |   |       | 0       |  | reduced       |                   | 10.1523/JNEUROSCI.18-08-02842.1998                      |
| KCNAI | R | 307 | C | LOF     | 11.4  |      |     |   |       | -64.7   |  | none          |                   | 10.1212/WNL.0b013e3181ea9ce3                            |

|              |   |     |   |       |      |      |       |   |    |       |  |               |                           |                                                         |
|--------------|---|-----|---|-------|------|------|-------|---|----|-------|--|---------------|---------------------------|---------------------------------------------------------|
| <i>KCNAI</i> | R | 324 | T | Mixed | 20   | 0    | 0     | 0 | 20 | -57   |  | none          | slow activation (2-4fold) | 10.1002/mds.26737                                       |
| <i>KCNAI</i> | S | 180 | L | LOF   |      |      |       |   |    | -0.94 |  |               |                           | 10.1074/jbc.274.17.11487.                               |
| <i>KCNAI</i> | S | 180 | P | LOF   |      |      |       |   |    | -0.89 |  |               |                           | 10.1074/jbc.274.17.11487.                               |
| <i>KCNAI</i> | S | 180 | R | LOF   |      |      |       |   |    | -0.94 |  |               |                           | 10.1074/jbc.274.17.11487.                               |
| <i>KCNAI</i> | S | 342 | I | LOF   |      |      |       |   |    | -2.87 |  | none          |                           | 10.1016/j.abb.2012.05.006                               |
| <i>KCNAI</i> | S | 342 | T | LOF   |      |      |       |   |    | -2.41 |  | increased     |                           | 10.1016/j.abb.2012.05.006                               |
| <i>KCNAI</i> | T | 226 | A | LOF   | 14.3 | -2.1 | 28.4  | 0 | 0  | -0.95 |  | reduced       |                           | 10.1016/S0014-5793(98)00814-X                           |
| <i>KCNAI</i> | T | 226 | K | LOF   |      |      |       |   |    | -0.34 |  |               |                           | 10.1007/s10048-006-0071-z                               |
| <i>KCNAI</i> | T | 226 | M | LOF   | 14.8 | -2   | 42.2  | 0 | 0  | -0.95 |  |               |                           | 10.1016/S0014-5793(98)00814-X                           |
| <i>KCNAI</i> | T | 226 | R | LOF   | -25  | -3.4 | 5     |   |    | -3.7  |  | none          |                           | 10.1111/j.1749-6632.1999.tb11310.x                      |
| <i>KCNAI</i> | T | 226 | R | LOF   | -25  | -3.4 | 5     |   |    | -3.7  |  | none          |                           | 10.1093/brain/122.5.817                                 |
| <i>KCNAI</i> | T | 318 | I | LOF   |      |      |       |   |    |       |  | not expressed |                           | 10.1113/jphysiol.2009.174730                            |
| <i>KCNAI</i> | V | 174 | F | LOF   | 35.1 | -2   | 3.2   |   |    | -0.92 |  |               | faster inactivation       | 10.1523/JNEUROSCI.18-08-02842.1998                      |
| <i>KCNAI</i> | V | 229 | I | LOF   | 54.1 |      |       |   |    | -23.6 |  |               |                           | 10.1212/WNL.0b013e3181b87959                            |
| <i>KCNAI</i> | V | 404 | I | LOF   | 11.3 | 1.9  | 7.2   |   |    | 0     |  | none          |                           | 10.1002/1531-8249(200010)48:4<647::AID-ANA12>3.0.CO;2-Q |
| <i>KCNAI</i> | V | 406 | L | GOF   | -30  |      |       |   |    |       |  |               |                           | 10.1113/jphysiol.2009.174730                            |
| <i>KCNAI</i> | V | 408 | A | LOF   | 1    | 0    | -16.8 |   |    | -1.4  |  | reduced       | faster inactivation       | 10.1046/j.1460-9568.1999.00659.x                        |
| <i>KCNAI</i> | V | 408 | A | LOF   | 0.4  | -0.6 | -20.7 |   |    | -0.5  |  |               | faster inactivation       | 10.1523/JNEUROSCI.18-08-02842.1998                      |
| <i>KCNAI</i> | V | 408 | A | LOF   | 0.9  | 1.9  | -3.6  |   |    |       |  |               |                           | 10.1096/fasebj.13.11.1335                               |
| <i>KCNAI</i> | V | 408 | L | LOF   |      |      |       |   |    |       |  | none          |                           | 10.1113/jphysiol.2009.174730                            |

|       |   |     |   |         |       |      |     |      |       |       |            |               |                                                  |                                |
|-------|---|-----|---|---------|-------|------|-----|------|-------|-------|------------|---------------|--------------------------------------------------|--------------------------------|
| KCNA1 | V | 408 | L | LOF     |       |      |     |      |       |       |            | not expressed |                                                  | 10.1002/mds.22467              |
| KCNA2 | E | 157 | K | GOF     | -10   | 3.5  |     | 0.8  | 1.9   | 3.7   |            |               |                                                  | 10.1093/brain/awx184           |
| KCNA2 | E | 183 | A | LOF     | 30    | 0    |     |      |       | 0     |            |               |                                                  | 10.1016/j.bpj.2012.03.032      |
| KCNA2 | E | 183 | D | LOF     |       |      |     |      |       | 0     | no current |               |                                                  | 10.1016/j.bpj.2012.03.032      |
| KCNA2 | E | 236 | A | GOF     | -15   |      |     |      |       | 0     |            |               |                                                  | 10.1016/j.bpj.2012.03.032      |
| KCNA2 | E | 236 | D | GOF     | -15   | 0    |     |      |       | 0     |            |               |                                                  | 10.1016/j.bpj.2012.03.032      |
| KCNA2 | E | 236 | L | Unclear | 0     | 0    |     |      |       | 0     |            |               |                                                  | 10.1016/j.bpj.2012.03.032      |
| KCNA2 | F | 180 | W | LOF     |       |      |     |      |       |       | no current |               |                                                  | 10.1016/j.bpj.2012.03.032      |
| KCNA2 | F | 180 | Y | GOF     | 0     |      |     |      |       |       |            |               |                                                  | 10.1016/j.bpj.2012.03.032      |
| KCNA2 | G | 398 | C | LOF     | 0     | 0    |     |      | 0     | -0.92 |            |               |                                                  | 10.1093/brain/awx184           |
| KCNA2 | I | 263 | T | LOF     | 9     | 4.7  |     | -1.3 | -0.2  | -0.87 |            | none          |                                                  | 10.1038/ng.3239                |
| KCNA2 | K | 306 | Q | LOF     | 2     |      |     |      |       |       |            |               |                                                  | 10.1016/j.bpj.2012.03.032      |
| KCNA2 | K | 322 | A | LOF     | 30    | 0    |     |      |       |       |            |               |                                                  | 10.1016/j.bpj.2012.03.032      |
| KCNA2 | K | 322 | L | LOF     |       |      |     |      |       | 0     |            |               |                                                  | 10.1016/j.bpj.2012.03.032      |
| KCNA2 | L | 290 | R | GOF     | -9.9  | 5.2  |     | -2.1 | -23.1 | 1.6   |            |               |                                                  | 10.1093/brain/awx184           |
| KCNA2 | L | 293 | H | GOF     | -46.5 | -2.1 |     | -1.3 | -58.4 | -0.1  |            |               |                                                  | 10.1093/brain/awx184           |
| KCNA2 | L | 298 | F | GOF     | -43.2 | 3.03 |     |      | 0     | 12.3  |            | none          |                                                  | 10.1038/ng.3239                |
| KCNA2 | L | 328 | V | Mixed   | -19.7 | 3.3  |     | -0.6 | -2.9  | -0.68 |            |               |                                                  | 10.1093/brain/awx184           |
| KCNA2 | N | 207 | Q | LOF     | 6.1   | 3.3  | 110 |      |       | 0     |            |               | Tau fast of inactivation significantly increased | 10.1016/j.brainres.2007.01.092 |
| KCNA2 | P | 405 | L | LOF     | -1    | 0    |     | 0.2  | -4.5  | -0.86 |            | none          |                                                  | 10.1038/ng.3239                |
| KCNA2 | Q | 357 | R | Neutral | -2.3  | -0.4 |     | -0.4 | -1.9  | -0.1  |            |               |                                                  | 10.1093/brain/awx184           |
| KCNA2 | R | 294 | H | LOF     | 6.2   | 4.2  |     |      | 0     | -0.9  |            |               |                                                  | 10.1002/ana.24762              |
| KCNA2 | R | 294 | Q | LOF     | -15   |      |     |      |       |       |            |               |                                                  | 10.1085/jgp.201411300          |



|               |   |     |   |       |       |     |  |      |      |       |  |            |  |                               |
|---------------|---|-----|---|-------|-------|-----|--|------|------|-------|--|------------|--|-------------------------------|
| <i>KCNA2</i>  | R | 294 | Q | GOF   | 25    |     |  |      |      |       |  |            |  | 10.1016/j.bpj.2012.03.032     |
| <i>KCNA2</i>  | R | 297 | Q | GOF   | -20   | 0   |  |      |      |       |  | none       |  | 10.1085/jgp.2014.11300        |
| <i>KCNA2</i>  | R | 297 | Q | GOF   | -38.3 | 1.7 |  |      | 0    | 6.4   |  |            |  | 10.1016/j.bpj.2012.03.032     |
| <i>KCNA2</i>  | R | 297 | Q | GOF   | -20   |     |  |      |      |       |  |            |  | 10.1038/ng.3239               |
| <i>KCNA2</i>  | R | 300 | N | GOF   | -5    |     |  |      |      |       |  |            |  | 10.1085/jgp.2014.11300        |
| <i>KCNA2</i>  | R | 300 | Q | LOF   |       |     |  |      |      | 0     |  |            |  | 10.1016/j.bpj.2012.03.032     |
| <i>KCNA2</i>  | R | 303 | Q | GOF   | 0     | 0   |  |      |      |       |  |            |  | 10.1085/jgp.2014.11300        |
| <i>KCNA2</i>  | R | 303 | Q | LOF   |       |     |  |      |      | 0     |  |            |  | 10.1016/j.bpj.2012.03.032     |
| <i>KCNA2</i>  | T | 252 | C | GOF   | -32.8 | 2   |  |      |      |       |  |            |  | 10.1529/biophysj.107.116160   |
| <i>KCNA2</i>  | T | 252 | D | GOF   | -9    | 3.7 |  |      |      |       |  |            |  | 10.1529/biophysj.107.116160   |
| <i>KCNA2</i>  | T | 252 | K | GOF   | -29.1 | 4.6 |  |      |      | 0     |  |            |  | 10.1529/biophysj.107.116160   |
| <i>KCNA2</i>  | T | 252 | R | GOF   | -30   | 4.9 |  |      |      |       |  |            |  | 10.1529/biophysj.107.116160   |
| <i>KCNA2</i>  | T | 374 | A | Mixed | -19.9 | 0.7 |  | -1.1 | -2.7 | -0.86 |  |            |  | 10.1093/brain/awx184          |
| <i>Shaker</i> | A | 355 | K | Mixed | 10    | 0   |  | 0    | 10   |       |  |            |  | 10.1074/jbc.M111.237792       |
| <i>Shaker</i> | A | 355 | R | Mixed | 10    | 0   |  | 0    | 10   |       |  |            |  | 10.1074/jbc.M111.237792       |
| <i>Shaker</i> | A | 359 | K | Mixed | 25    | 0   |  |      | 30   |       |  |            |  | 10.1074/jbc.M111.237792       |
| <i>Shaker</i> | A | 359 | R | Mixed | 25    | 0   |  | 0    | 25   |       |  |            |  | 10.1074/jbc.M111.237792       |
| <i>Shaker</i> | A | 391 | V | GOF   | -15.7 |     |  |      |      |       |  |            |  | 10.1016/s0092-8674(02)01013-9 |
| <i>Shaker</i> | A | 413 | V | LOF   | 1     |     |  |      |      |       |  |            |  | 10.1016/s0092-8674(02)01013-9 |
| <i>Shaker</i> | A | 413 | W | LOF   | 12.4  |     |  |      |      |       |  |            |  | 10.1016/j.neuron.2006.10.005  |
| <i>Shaker</i> | A | 417 | V | GOF   | -0.9  |     |  |      |      |       |  |            |  | 10.1016/s0092-8674(02)01013-9 |
| <i>Shaker</i> | A | 417 | W | LOF   |       |     |  |      |      |       |  | no current |  | 10.1016/j.neuron.2006.10.005  |
| <i>Shaker</i> | A | 419 | V | GOF   | -2.5  |     |  |      |      |       |  |            |  | 10.1016/s0092-8674(02)01013-9 |
| <i>Shaker</i> | A | 432 | V | GOF   | -3.5  |     |  |      |      |       |  |            |  | 10.1016/s0092-8674(02)01013-9 |

|        |   |     |   |         |       |      |  |  |  |  |  |            |               |  |  |  |                             |                               |
|--------|---|-----|---|---------|-------|------|--|--|--|--|--|------------|---------------|--|--|--|-----------------------------|-------------------------------|
| Shaker | A | 436 | V | GOF     | -18   |      |  |  |  |  |  |            |               |  |  |  |                             | 10.1016/s0092-8674(02)01013-9 |
| Shaker | A | 463 | C | LOF     | 14    |      |  |  |  |  |  |            | none          |  |  |  |                             | 10.1085/jgp.112.2.243         |
| Shaker | A | 463 | V | LOF     | -0.9  |      |  |  |  |  |  |            |               |  |  |  |                             | 10.1016/s0092-8674(02)01013-9 |
| Shaker | A | 463 | W | LOF     |       |      |  |  |  |  |  | no current |               |  |  |  |                             | 10.1016/j.neuron.2006.10.005  |
| Shaker | A | 465 | V | GOF     | -19.8 |      |  |  |  |  |  |            |               |  |  |  |                             | 10.1016/s0092-8674(02)01013-9 |
| Shaker | A | 471 | D | Unclear | -6.5  |      |  |  |  |  |  |            |               |  |  |  | Two phases in the I-V curve | 10.1085/jgp.2002.8569.        |
| Shaker | A | 471 | V | LOF     |       |      |  |  |  |  |  |            | not expressed |  |  |  |                             | 10.1016/s0092-8674(02)01013-9 |
| Shaker | A | 471 | W | LOF     | 6.7   |      |  |  |  |  |  |            |               |  |  |  |                             | 10.1085/jgp.2002.8569.        |
| Shaker | C | 462 | A | Neutral | 0.5   |      |  |  |  |  |  |            |               |  |  |  |                             | 10.1016/s0092-8674(02)01013-9 |
| Shaker | C | 462 | W | LOF     |       |      |  |  |  |  |  | no current |               |  |  |  |                             | 10.1016/j.neuron.2006.10.005  |
| Shaker | D | 316 | N | LOF     | 67    |      |  |  |  |  |  |            |               |  |  |  |                             | 10.1016/0896-6273(95)90276-7  |
| Shaker | D | 431 | A | GOF     | -2.7  |      |  |  |  |  |  |            |               |  |  |  |                             | 10.1016/s0092-8674(02)01013-9 |
| Shaker | D | 447 | N | LOF     |       |      |  |  |  |  |  | no current |               |  |  |  |                             | 10.1016/0896-6273(95)90276-7  |
| Shaker | E | 283 | Q | LOF     | 78    | 10.6 |  |  |  |  |  |            |               |  |  |  |                             | 10.1016/0896-6273(95)90276-7  |
| Shaker | E | 293 | Q | GOF     | -17   | 0.9  |  |  |  |  |  |            |               |  |  |  |                             | 10.1016/0896-6273(95)90276-7  |
| Shaker | E | 395 | A | GOF     | -33.7 |      |  |  |  |  |  |            |               |  |  |  |                             | 10.1016/s0092-8674(02)01013-9 |
| Shaker | E | 395 | W | LOF     | 210.9 |      |  |  |  |  |  |            |               |  |  |  |                             | 10.1016/j.neuron.2006.10.005  |
| Shaker | E | 422 | A | GOF     | -0.7  |      |  |  |  |  |  |            |               |  |  |  |                             | 10.1016/s0092-8674(02)01013-9 |
| Shaker | E | 488 | C | Neutral | 0     |      |  |  |  |  |  |            |               |  |  |  |                             | 10.1085/jgp.2002.8611.        |
| Shaker | F | 244 | W | LOF     | 40    |      |  |  |  |  |  |            |               |  |  |  |                             | 10.1085/jgp.2012.10827        |
| Shaker | F | 370 | M | GOF     | -22.1 | -2.3 |  |  |  |  |  |            |               |  |  |  |                             | 10.1085/jgp.111.3.421         |
| Shaker | F | 401 | A | Unclear |       |      |  |  |  |  |  |            |               |  |  |  | two phases in the I-V curve | 10.1016/s0092-8674(02)01013-9 |
| Shaker | F | 402 | A | Unclear |       |      |  |  |  |  |  |            |               |  |  |  | two phases in the I-V curve | 10.1016/s0092-8674(02)01013-9 |



|               |   |     |   |         |      |     |  |  |  |  |  |            |               |                               |
|---------------|---|-----|---|---------|------|-----|--|--|--|--|--|------------|---------------|-------------------------------|
| <i>Shaker</i> | G | 466 | A | LOF     |      |     |  |  |  |  |  |            | not expressed | 10.1016/s0092-8674(02)01013-9 |
| <i>Shaker</i> | G | 466 | W | LOF     |      |     |  |  |  |  |  | no current |               | 10.1016/j.neuron.2006.10.005  |
| <i>Shaker</i> | H | 486 | A | LOF     | 2.5  |     |  |  |  |  |  |            |               | 10.1016/s0092-8674(02)01013-9 |
| <i>Shaker</i> | H | 486 | C | GOF     | -5.9 |     |  |  |  |  |  |            |               | 10.1085/jgp.2002.8611.        |
| <i>Shaker</i> | I | 241 | A | LOF     | 25   |     |  |  |  |  |  |            |               | 10.1085/jgp.2012.10827        |
| <i>Shaker</i> | I | 241 | C | LOF     | 12   |     |  |  |  |  |  |            |               | 10.1085/jgp.2012.10827        |
| <i>Shaker</i> | I | 241 | F | LOF     | 30   |     |  |  |  |  |  |            |               | 10.1085/jgp.2012.10827        |
| <i>Shaker</i> | I | 241 | G | LOF     | 20   |     |  |  |  |  |  |            |               | 10.1085/jgp.2012.10827        |
| <i>Shaker</i> | I | 241 | L | GOF     | -5   |     |  |  |  |  |  |            |               | 10.1085/jgp.2012.10827        |
| <i>Shaker</i> | I | 241 | M | LOF     | 9    |     |  |  |  |  |  |            |               | 10.1085/jgp.2012.10827        |
| <i>Shaker</i> | I | 241 | N | LOF     | 40   |     |  |  |  |  |  |            |               | 10.1085/jgp.2012.10827        |
| <i>Shaker</i> | I | 241 | Q | LOF     | 20   |     |  |  |  |  |  |            |               | 10.1085/jgp.2012.10827        |
| <i>Shaker</i> | I | 241 | S | LOF     | 20   |     |  |  |  |  |  |            |               | 10.1085/jgp.2012.10827        |
| <i>Shaker</i> | I | 241 | T | GOF     | -10  |     |  |  |  |  |  |            |               | 10.1085/jgp.2012.10827        |
| <i>Shaker</i> | I | 241 | V | Neutral | 0    |     |  |  |  |  |  |            |               | 10.1085/jgp.2012.10827        |
| <i>Shaker</i> | I | 241 | W | LOF     | 45   |     |  |  |  |  |  |            |               | 10.1085/jgp.2012.10827        |
| <i>Shaker</i> | I | 241 | Y | LOF     | 50   |     |  |  |  |  |  |            |               | 10.1085/jgp.2012.10827        |
| <i>Shaker</i> | I | 372 | L | LOF     | 54.5 | 7.6 |  |  |  |  |  |            |               | 10.1085/jgp.111.3.421         |
| <i>Shaker</i> | I | 400 | A | GOF     | -2.6 |     |  |  |  |  |  |            |               | 10.1016/s0092-8674(02)01013-9 |
| <i>Shaker</i> | I | 405 | A | LOF     | 3.5  |     |  |  |  |  |  |            |               | 10.1016/s0092-8674(02)01013-9 |
| <i>Shaker</i> | I | 405 | W | LOF     | 55.5 |     |  |  |  |  |  |            |               | 10.1016/j.neuron.2006.10.005  |
| <i>Shaker</i> | I | 429 | A | LOF     | 17.2 |     |  |  |  |  |  |            |               | 10.1016/s0092-8674(02)01013-9 |
| <i>Shaker</i> | I | 457 | A | LOF     | 6.5  |     |  |  |  |  |  |            |               | 10.1016/s0092-8674(02)01013-9 |

|        |   |     |   |       |       |      |  |      |     |  |  |            |               |  |  |  |  |                               |
|--------|---|-----|---|-------|-------|------|--|------|-----|--|--|------------|---------------|--|--|--|--|-------------------------------|
| Shaker | I | 457 | W | LOF   | 16.7  |      |  |      |     |  |  |            |               |  |  |  |  | 10.1016/j.neuron.2006.10.005  |
| Shaker | I | 464 | A | GOF   | -2.5  |      |  |      |     |  |  |            |               |  |  |  |  | 10.1016/s0092-8674(02)01013-9 |
| Shaker | I | 464 | W | LOF   |       |      |  |      |     |  |  | no current |               |  |  |  |  | 10.1016/j.neuron.2006.10.005  |
| Shaker | I | 470 | A | GOF   | -1.5  |      |  |      |     |  |  |            |               |  |  |  |  | 10.1085/jgp.20028569.         |
| Shaker | I | 470 | A | LOF   | 12.6  |      |  |      |     |  |  |            |               |  |  |  |  | 10.1016/s0092-8674(02)01013-9 |
| Shaker | I | 470 | D | LOF   |       |      |  |      |     |  |  |            | not expressed |  |  |  |  | 10.1085/jgp.20028569.         |
| Shaker | I | 470 | W | GOF   | -16.6 |      |  |      |     |  |  |            |               |  |  |  |  | 10.1085/jgp.20028569.         |
| Shaker | I | 470 | W | GOF   | -16.6 |      |  |      |     |  |  |            |               |  |  |  |  | 10.1016/j.neuron.2006.10.005  |
| Shaker | I | 477 | A | GOF   | -29.2 |      |  |      |     |  |  |            |               |  |  |  |  | 10.1016/s0092-8674(02)01013-9 |
| Shaker | I | 477 | A | GOF   | -17.2 |      |  |      |     |  |  |            |               |  |  |  |  | 10.1085/jgp.200308905         |
| Shaker | I | 477 | D | LOF   |       |      |  |      |     |  |  |            | not expressed |  |  |  |  | 10.1085/jgp.20028569.         |
| Shaker | I | 477 | W | GOF   | -29.9 |      |  |      |     |  |  |            |               |  |  |  |  | 10.1085/jgp.200308905         |
| Shaker | K | 374 | Q | LOF   |       |      |  |      |     |  |  |            | not expressed |  |  |  |  | 10.1016/0896-6273(95)90276-7  |
| Shaker | K | 374 | Q | LOF   |       |      |  |      |     |  |  | no current |               |  |  |  |  | 10.1038/349305a0.             |
| Shaker | K | 374 | R | LOF   | 2     | -1   |  | 1.5  | -2  |  |  |            |               |  |  |  |  | 10.1038/349305a0.             |
| Shaker | K | 380 | Q | LOF   | 5     | 1    |  | -0.4 | -4  |  |  |            |               |  |  |  |  | 10.1038/349305a0.             |
| Shaker | K | 380 | R | GOF   | -6    | -3   |  | -0.7 | -3  |  |  |            |               |  |  |  |  | 10.1038/349305a0.             |
| Shaker | K | 390 | A | GOF   | -6.3  |      |  |      |     |  |  |            |               |  |  |  |  | 10.1016/s0092-8674(02)01013-9 |
| Shaker | K | 427 | A | GOF   | -5.9  |      |  |      |     |  |  |            |               |  |  |  |  | 10.1016/s0092-8674(02)01013-9 |
| Shaker | K | 456 | A | LOF   |       |      |  |      |     |  |  |            | not expressed |  |  |  |  | 10.1016/s0092-8674(02)01013-9 |
| Shaker | K | 456 | W | LOF   |       |      |  |      |     |  |  | no current |               |  |  |  |  | 10.1016/j.neuron.2006.10.005  |
| Shaker | L | 358 | F | Mixed | 10    | 0    |  | 0    | 10  |  |  |            |               |  |  |  |  | 10.1074/jbc.M111.237792       |
| Shaker | L | 358 | K | Mixed | -30   | 2.47 |  | 1.87 | -30 |  |  |            |               |  |  |  |  | 10.1074/jbc.M111.237792       |

|               |   |     |   |         |       |      |  |      |     |  |               |                             |  |                               |
|---------------|---|-----|---|---------|-------|------|--|------|-----|--|---------------|-----------------------------|--|-------------------------------|
| <i>Shaker</i> | L | 358 | Q | Mixed   | -30   | 2.09 |  | 2.99 | -30 |  |               |                             |  | 10.1074/jbc.M111.237792       |
| <i>Shaker</i> | L | 358 | R | Mixed   | -30   | 2.54 |  | 1.72 | -30 |  |               |                             |  | 10.1074/jbc.M111.237792       |
| <i>Shaker</i> | L | 361 | E | Mixed   | -20   | 5.3  |  | 3.6  | -40 |  |               | fast activation             |  | 10.1113/jphysiol.2007.131490  |
| <i>Shaker</i> | L | 361 | F | Neutral | 0     | -2.2 |  | -0.5 | 0   |  |               |                             |  | 10.1113/jphysiol.2007.131490  |
| <i>Shaker</i> | L | 361 | K | Mixed   | -60   | 4    |  | 4.4  | -76 |  |               | fast activation             |  | 10.1113/jphysiol.2007.131490  |
| <i>Shaker</i> | L | 361 | Q | Mixed   | -30   | 1.6  |  | 3.6  | -40 |  |               | fast activation             |  | 10.1113/jphysiol.2007.131490  |
| <i>Shaker</i> | L | 361 | R | Mixed   | -60   | 3    |  | 1.7  | -71 |  |               | fast activation             |  | 10.1113/jphysiol.2007.131490  |
| <i>Shaker</i> | L | 366 | A | GOF     | -40.3 |      |  |      |     |  |               |                             |  | 10.1016/s0092-8674(02)01013-9 |
| <i>Shaker</i> | L | 396 | A | Unclear |       |      |  |      |     |  |               | two phases in the I-V curve |  | 10.1016/s0092-8674(02)01013-9 |
| <i>Shaker</i> | L | 398 | W | LOF     |       |      |  |      |     |  | not expressed |                             |  | 10.1016/j.neuron.2006.10.005  |
| <i>Shaker</i> | L | 398 | W | LOF     | 51.6  |      |  |      |     |  |               |                             |  | 10.1016/s0092-8674(02)01013-9 |
| <i>Shaker</i> | L | 399 | A | Unclear |       |      |  |      |     |  |               | two phases in the I-V curve |  | 10.1016/s0092-8674(02)01013-9 |
| <i>Shaker</i> | L | 403 | A | LOF     | 6.5   |      |  |      |     |  |               |                             |  | 10.1016/s0092-8674(02)01013-9 |
| <i>Shaker</i> | L | 409 | A | LOF     | 13    |      |  |      |     |  |               |                             |  | 10.1016/s0092-8674(02)01013-9 |
| <i>Shaker</i> | L | 409 | W | LOF     | 32.2  |      |  |      |     |  |               |                             |  | 10.1016/j.neuron.2006.10.005  |
| <i>Shaker</i> | L | 461 | A | GOF     | -8.5  |      |  |      |     |  |               |                             |  | 10.1016/s0092-8674(02)01013-9 |
| <i>Shaker</i> | L | 461 | W | GOF     | -1.7  |      |  |      |     |  |               |                             |  | 10.1016/j.neuron.2006.10.005  |
| <i>Shaker</i> | L | 468 | A | LOF     | 18.2  |      |  |      |     |  |               |                             |  | 10.1016/s0092-8674(02)01013-9 |
| <i>Shaker</i> | L | 468 | W | GOF     | -17.1 |      |  |      |     |  |               |                             |  | 10.1016/j.neuron.2006.10.005  |
| <i>Shaker</i> | L | 472 | A | LOF     | 12.6  |      |  |      |     |  |               |                             |  | 10.1016/s0092-8674(02)01013-9 |
| <i>Shaker</i> | L | 472 | A | LOF     | 25.6  |      |  |      |     |  |               |                             |  | 10.1085/jgp.2002.8569.        |
| <i>Shaker</i> | L | 472 | D | LOF     |       |      |  |      |     |  |               | not expressed               |  | 10.1085/jgp.2002.8569.        |
| <i>Shaker</i> | L | 472 | W | LOF     | 80.9  |      |  |      |     |  |               |                             |  | 10.1016/j.neuron.2006.10.005  |

|        |   |     |   |         |       |   |  |   |    |   |  |  |            |  |  |  |                  |                                   |
|--------|---|-----|---|---------|-------|---|--|---|----|---|--|--|------------|--|--|--|------------------|-----------------------------------|
| Shaker | L | 472 | W | LOF     | 80.9  |   |  |   |    |   |  |  |            |  |  |  |                  | 10.1085/jgp.2002<br>8569.         |
| Shaker | M | 356 | K | Mixed   | 25    | 0 |  | 0 | 25 |   |  |  |            |  |  |  |                  | 10.1074/jbc.M111<br>.237792       |
| Shaker | M | 356 | R | Mixed   | 20    | 0 |  | 0 | 20 |   |  |  |            |  |  |  |                  | 10.1074/jbc.M111<br>.237792       |
| Shaker | M | 393 | A | LOF     | 20.1  |   |  |   |    |   |  |  |            |  |  |  |                  | 10.1016/s0092-<br>8674(02)01013-9 |
| Shaker | M | 393 | W | GOF     | -13.4 |   |  |   |    |   |  |  |            |  |  |  |                  | 10.1016/j.neuron.<br>2006.10.005  |
| Shaker | M | 448 | A | Neutral | -0.2  |   |  |   |    |   |  |  |            |  |  |  |                  | 10.1016/s0092-<br>8674(02)01013-9 |
| Shaker | N | 353 | R | LOF     | 10    | 0 |  | 0 | 0  | 0 |  |  |            |  |  |  |                  | 10.1074/jbc.M111<br>.237792       |
| Shaker | N | 423 | A | GOF     | -0.7  |   |  |   |    |   |  |  |            |  |  |  |                  | 10.1016/s0092-<br>8674(02)01013-9 |
| Shaker | N | 480 | A | LOF     |       |   |  |   |    |   |  |  |            |  |  |  | not<br>expressed | 10.1016/s0092-<br>8674(02)01013-9 |
| Shaker | N | 480 | A | LOF     | 80.5  |   |  |   |    |   |  |  |            |  |  |  |                  | 10.1085/jgp.2002<br>8569.         |
| Shaker | N | 480 | D | GOF     | -18   |   |  |   |    |   |  |  |            |  |  |  |                  | 10.1085/jgp.2002<br>8569.         |
| Shaker | N | 480 | W | LOF     | 35.8  |   |  |   |    |   |  |  |            |  |  |  |                  | 10.1085/jgp.2002<br>8569.         |
| Shaker | N | 482 | A | GOF     | -9.5  |   |  |   |    |   |  |  |            |  |  |  |                  | 10.1016/s0092-<br>8674(02)01013-9 |
| Shaker | N | 482 | A | GOF     | -6.1  |   |  |   |    |   |  |  |            |  |  |  |                  | 10.1085/jgp.2002<br>8569.         |
| Shaker | N | 482 | C | LOF     | 5.4   |   |  |   |    |   |  |  |            |  |  |  |                  | 10.1085/jgp.2002<br>8611.         |
| Shaker | N | 482 | D | GOF     | -2    |   |  |   |    |   |  |  |            |  |  |  |                  | 10.1085/jgp.2002<br>8569.         |
| Shaker | N | 482 | W | GOF     | -17.3 |   |  |   |    |   |  |  |            |  |  |  |                  | 10.1085/jgp.2002<br>8569.         |
| Shaker | P | 430 | A | LOF     |       |   |  |   |    |   |  |  |            |  |  |  | not<br>expressed | 10.1016/s0092-<br>8674(02)01013-9 |
| Shaker | P | 430 | G | LOF     |       |   |  |   |    |   |  |  | no current |  |  |  |                  | 10.1038/349700a0                  |
| Shaker | P | 450 | A | LOF     |       |   |  |   |    |   |  |  |            |  |  |  | not<br>expressed | 10.1016/s0092-<br>8674(02)01013-9 |
| Shaker | P | 450 | G | LOF     |       |   |  |   |    |   |  |  | no current |  |  |  |                  | 10.1038/349700a0                  |
| Shaker | P | 473 | A | LOF     |       |   |  |   |    |   |  |  | no current |  |  |  |                  | 10.1016/s0092-<br>8674(02)01013-9 |
| Shaker | P | 473 | D | LOF     |       |   |  |   |    |   |  |  |            |  |  |  | not<br>expressed | 10.1085/jgp.2002<br>8569.         |
| Shaker | P | 473 | W | LOF     |       |   |  |   |    |   |  |  | no current |  |  |  |                  | 10.1085/jgp.2002<br>8569.         |

|        |   |     |   |       |       |     |  |      |    |  |  |            |  |  |                           |
|--------|---|-----|---|-------|-------|-----|--|------|----|--|--|------------|--|--|---------------------------|
| Shaker | P | 475 | A | LOF   |       |     |  |      |    |  |  | no current |  |  | 10.1016/j.bpj.2013.11.025 |
| Shaker | P | 475 | A | LOF   | 101   |     |  |      |    |  |  |            |  |  | 10.1085/jgp.2002.8569.    |
| Shaker | P | 475 | C | LOF   | 176.5 |     |  |      |    |  |  |            |  |  | 10.1085/jgp.2003.08905.   |
| Shaker | P | 475 | D | GOF   | -68   |     |  |      |    |  |  |            |  |  | 10.1085/jgp.2003.08905.   |
| Shaker | P | 475 | E | GOF   | -65.6 |     |  |      |    |  |  |            |  |  | 10.1085/jgp.2003.08905.   |
| Shaker | P | 475 | F | LOF   | 8.9   |     |  |      |    |  |  |            |  |  | 10.1085/jgp.2003.08905.   |
| Shaker | P | 475 | G | LOF   | 75.1  |     |  |      |    |  |  |            |  |  | 10.1085/jgp.2002.8569.    |
| Shaker | P | 475 | G | LOF   | 75.1  |     |  |      |    |  |  |            |  |  | 10.1016/j.bpj.2013.11.025 |
| Shaker | P | 475 | H | GOF   | -45.5 |     |  |      |    |  |  |            |  |  | 10.1085/jgp.2003.08905.   |
| Shaker | P | 475 | I | LOF   | 94.4  |     |  |      |    |  |  |            |  |  | 10.1085/jgp.2003.08905.   |
| Shaker | P | 475 | K | GOF   | -63.7 |     |  |      |    |  |  |            |  |  | 10.1085/jgp.2003.08905.   |
| Shaker | P | 475 | M | LOF   | 18.6  |     |  |      |    |  |  |            |  |  | 10.1085/jgp.2003.08905.   |
| Shaker | P | 475 | N | GOF   | -53.1 |     |  |      |    |  |  |            |  |  | 10.1085/jgp.2003.08905.   |
| Shaker | P | 475 | Q | GOF   | -64.7 |     |  |      |    |  |  |            |  |  | 10.1085/jgp.2003.08905.   |
| Shaker | P | 475 | D | GOF   | -42.3 |     |  |      |    |  |  |            |  |  | 10.1085/jgp.2003.08905.   |
| Shaker | P | 475 | S | LOF   | 225.5 |     |  |      |    |  |  |            |  |  | 10.1085/jgp.2002.8569.    |
| Shaker | P | 475 | T | LOF   | 15.5  |     |  |      |    |  |  |            |  |  | 10.1085/jgp.2003.08905.   |
| Shaker | P | 475 | V | LOF   | 95.3  |     |  |      |    |  |  |            |  |  | 10.1085/jgp.2003.08905.   |
| Shaker | P | 475 | W | GOF   | -18.9 |     |  |      |    |  |  |            |  |  | 10.1085/jgp.2003.08905.   |
| Shaker | P | 475 | Y | GOF   | -17.8 |     |  |      |    |  |  |            |  |  | 10.1085/jgp.2003.08905.   |
| Shaker | R | 297 | K | Mixed | 8     | -1  |  | 3.5  | 14 |  |  |            |  |  | 10.1038/349305a0.         |
| Shaker | R | 362 | E | LOF   | 16    | 4.2 |  |      |    |  |  |            |  |  | 10.1085/jgp.111.3.421     |
| Shaker | R | 362 | K | LOF   | 11    | -2  |  | -0.8 | 12 |  |  |            |  |  | 10.1038/349305a0.         |



|               |   |     |   |         |      |     |  |      |     |  |  |               |  |                               |
|---------------|---|-----|---|---------|------|-----|--|------|-----|--|--|---------------|--|-------------------------------|
| <i>Shaker</i> | R | 362 | Q | Mixed   | 19   | 1   |  | 4.2  | 22  |  |  |               |  | 10.1038/349305a0              |
| <i>Shaker</i> | R | 365 | K | Mixed   | 7    | 2   |  | 0.2  | 4   |  |  |               |  | 10.1038/349305a0              |
| <i>Shaker</i> | R | 365 | Q | Mixed   | -11  | 1   |  | 2.9  | -14 |  |  |               |  | 10.1038/349305a0              |
| <i>Shaker</i> | R | 368 | K | LOF     | 7    | 2   |  | -0.3 | -8  |  |  |               |  | 10.1038/349305a0              |
| <i>Shaker</i> | R | 368 | Q | LOF     | 51   | 6   |  | 12.1 | 55  |  |  |               |  | 10.1016/s0006-3495(94)80783-0 |
| <i>Shaker</i> | R | 368 | Q | LOF     | 108  |     |  |      |     |  |  |               |  | 10.1038/349305a0              |
| <i>Shaker</i> | R | 371 | K | Mixed   | 62   | -4  |  | 3.9  | 64  |  |  |               |  | 10.1038/349305a0              |
| <i>Shaker</i> | R | 371 | Q | Neutral | -1   |     |  |      |     |  |  |               |  | 10.1016/s0006-3495(94)80783-0 |
| <i>Shaker</i> | R | 371 | Q | Mixed   | -17  | 3   |  | 0.4  | -14 |  |  |               |  | 10.1038/349305a0              |
| <i>Shaker</i> | R | 377 | K | LOF     | 31   | 4   |  | 10.1 | 27  |  |  |               |  | 10.1016/s0006-3495(94)80783-0 |
| <i>Shaker</i> | R | 377 | K | LOF     | 36   |     |  |      |     |  |  |               |  | 10.1038/349305a0              |
| <i>Shaker</i> | R | 377 | Q | LOF     |      |     |  |      |     |  |  | no current    |  | 10.1038/349305a0              |
| <i>Shaker</i> | R | 377 | Q | LOF     |      |     |  |      |     |  |  |               |  | 10.1016/0896-6273(95)90276-7  |
| <i>Shaker</i> | R | 394 | A | LOF     | 7.8  |     |  |      |     |  |  |               |  | 10.1016/s0092-8674(02)01013-9 |
| <i>Shaker</i> | R | 394 | W | LOF     | 23.3 |     |  |      |     |  |  |               |  | 10.1016/j.neuron.2006.10.005  |
| <i>Shaker</i> | R | 487 | C | GOF     | -4   |     |  |      |     |  |  |               |  | 10.1085/jgp.2002.8611.        |
| <i>Shaker</i> | S | 376 | T | LOF     | 20   | 6.1 |  |      |     |  |  |               |  | 10.1085/jgp.111.3.421         |
| <i>Shaker</i> | S | 392 | A | LOF     |      |     |  |      |     |  |  | not expressed |  | 10.1016/s0092-8674(02)01013-9 |
| <i>Shaker</i> | S | 411 | A | LOF     | 1    |     |  |      |     |  |  |               |  | 10.1016/s0092-8674(02)01013-9 |
| <i>Shaker</i> | S | 411 | W | LOF     |      |     |  |      |     |  |  | no current    |  | 10.1016/j.neuron.2006.10.005  |
| <i>Shaker</i> | S | 412 | A | LOF     | 1.7  |     |  |      |     |  |  |               |  | 10.1016/s0092-8674(02)01013-9 |
| <i>Shaker</i> | S | 412 | W | LOF     |      |     |  |      |     |  |  | reduced       |  | 10.1016/j.neuron.2006.10.005  |
| <i>Shaker</i> | S | 421 | A | GOF     | -1.7 |     |  |      |     |  |  |               |  | 10.1016/s0092-8674(02)01013-9 |

|        |   |     |   |         |       |  |  |  |  |  |            |  |  |               |  |  |                                                         |                               |
|--------|---|-----|---|---------|-------|--|--|--|--|--|------------|--|--|---------------|--|--|---------------------------------------------------------|-------------------------------|
| Shaker | S | 424 | A | LOF     | 3.6   |  |  |  |  |  |            |  |  |               |  |  |                                                         | 10.1016/s0092-8674(02)01013-9 |
| Shaker | S | 428 | A | LOF     | 15    |  |  |  |  |  |            |  |  |               |  |  |                                                         | 10.1016/s0092-8674(02)01013-9 |
| Shaker | S | 460 | A | GOF     | -10.4 |  |  |  |  |  |            |  |  |               |  |  |                                                         | 10.1016/s0092-8674(02)01013-9 |
| Shaker | S | 460 | W | LOF     |       |  |  |  |  |  |            |  |  | reduced       |  |  |                                                         | 10.1016/j.neuron.2006.10.005  |
| Shaker | S | 479 | A | LOF     | 1.7   |  |  |  |  |  |            |  |  |               |  |  |                                                         | 10.1016/s0092-8674(02)01013-9 |
| Shaker | S | 479 | A | Neutral | 0.2   |  |  |  |  |  |            |  |  |               |  |  |                                                         | 10.1085/jgp.2002.8569.        |
| Shaker | S | 479 | D | GOF     | -27.5 |  |  |  |  |  |            |  |  |               |  |  |                                                         | 10.1085/jgp.2002.8569.        |
| Shaker | S | 479 | W | LOF     | 85.5  |  |  |  |  |  |            |  |  |               |  |  |                                                         | 10.1085/jgp.2002.8569.        |
| Shaker | T | 439 | A | LOF     |       |  |  |  |  |  |            |  |  | not expressed |  |  |                                                         | 10.1016/s0092-8674(02)01013-9 |
| Shaker | T | 439 | A | LOF     |       |  |  |  |  |  | no current |  |  |               |  |  |                                                         | 10.1038/349700a0              |
| Shaker | T | 439 | S | LOF     |       |  |  |  |  |  | no current |  |  |               |  |  |                                                         | 10.1038/349700a0              |
| Shaker | T | 441 | A | LOF     | 9.2   |  |  |  |  |  |            |  |  |               |  |  |                                                         | 10.1016/s0092-8674(02)01013-9 |
| Shaker | T | 441 | S | Neutral |       |  |  |  |  |  |            |  |  |               |  |  | inactivation state stabilized, 50% decrease of recovery | 10.1016/S0006-3495(95)80206-7 |
| Shaker | T | 441 | S | Unclear |       |  |  |  |  |  |            |  |  |               |  |  | care: may change ion selectivity!                       | 10.1038/349700a0              |
| Shaker | T | 442 | A | LOF     | -25.8 |  |  |  |  |  | no current |  |  |               |  |  |                                                         | 10.1016/s0092-8674(02)01013-9 |
| Shaker | T | 442 | A | GOF     | -26   |  |  |  |  |  |            |  |  |               |  |  |                                                         | 10.1038/349700a0              |
| Shaker | T | 442 | S | Mixed   | -21   |  |  |  |  |  |            |  |  |               |  |  | inactivation state destabilized, c-Type inactivation    | 10.1016/S0006-3495(95)80206-7 |
| Shaker | T | 442 | S | Mixed   | -20.5 |  |  |  |  |  | -22        |  |  |               |  |  | care: may change ion selectivity!                       | 10.1038/349700a0              |
| Shaker | T | 449 | A | GOF     | -5    |  |  |  |  |  |            |  |  |               |  |  |                                                         | 10.1016/s0092-8674(02)01013-9 |
| Shaker | T | 469 | A | GOF     | -19.5 |  |  |  |  |  |            |  |  |               |  |  |                                                         | 10.1016/s0092-8674(02)01013-9 |
| Shaker | T | 469 | A | GOF     | -5.8  |  |  |  |  |  |            |  |  |               |  |  |                                                         | 10.1085/jgp.2002.8569.        |
| Shaker | T | 469 | D | LOF     |       |  |  |  |  |  |            |  |  | not expressed |  |  |                                                         | 10.1085/jgp.2002.8569.        |

|        |   |     |   |         |       |     |  |  |  |  |  |            |  |                  |  |  |  |                                   |
|--------|---|-----|---|---------|-------|-----|--|--|--|--|--|------------|--|------------------|--|--|--|-----------------------------------|
| Shaker | T | 469 | W | GOF     | -6.2  |     |  |  |  |  |  |            |  |                  |  |  |  | 10.1085/jgp.2002<br>8569.         |
| Shaker | T | 469 | W | GOF     | -6.2  |     |  |  |  |  |  |            |  |                  |  |  |  | 10.1016/j.neuron.<br>2006.10.005  |
| Shaker | T | 489 | C | Neutral | -0.7  |     |  |  |  |  |  | no current |  |                  |  |  |  | 10.1085/jgp.2002<br>8611.         |
| Shaker | V | 369 | I | LOF     | 17.8  | 2.9 |  |  |  |  |  |            |  |                  |  |  |  | 10.1085/jgp.111.3<br>.421         |
| Shaker | V | 407 | A | GOF     | -4.4  |     |  |  |  |  |  |            |  |                  |  |  |  | 10.1016/s0092-<br>8674(02)01013-9 |
| Shaker | V | 408 | A | LOF     | 9.7   |     |  |  |  |  |  |            |  |                  |  |  |  | 10.1016/s0092-<br>8674(02)01013-9 |
| Shaker | V | 408 | W | LOF     | 32.6  |     |  |  |  |  |  |            |  |                  |  |  |  | 10.1016/j.neuron.<br>2006.10.005  |
| Shaker | V | 414 | A | LOF     | 4     |     |  |  |  |  |  |            |  |                  |  |  |  | 10.1016/s0092-<br>8674(02)01013-9 |
| Shaker | V | 414 | W | LOF     |       |     |  |  |  |  |  | no current |  |                  |  |  |  | 10.1016/j.neuron.<br>2006.10.005  |
| Shaker | V | 437 | A | GOF     | -17.8 |     |  |  |  |  |  |            |  |                  |  |  |  | 10.1016/s0092-<br>8674(02)01013-9 |
| Shaker | V | 443 | A | LOF     |       |     |  |  |  |  |  |            |  | not<br>expressed |  |  |  | 10.1016/s0092-<br>8674(02)01013-9 |
| Shaker | V | 451 | A | GOF     | -1    |     |  |  |  |  |  |            |  |                  |  |  |  | 10.1016/s0092-<br>8674(02)01013-9 |
| Shaker | V | 453 | A | LOF     | 2     |     |  |  |  |  |  |            |  |                  |  |  |  | 10.1016/s0092-<br>8674(02)01013-9 |
| Shaker | V | 453 | W | GOF     | -4    |     |  |  |  |  |  |            |  |                  |  |  |  | 10.1016/j.neuron.<br>2006.10.005  |
| Shaker | V | 458 | A | GOF     | -21   |     |  |  |  |  |  |            |  |                  |  |  |  | 10.1016/s0092-<br>8674(02)01013-9 |
| Shaker | V | 458 | W | LOF     | 24    |     |  |  |  |  |  |            |  |                  |  |  |  | 10.1016/j.neuron.<br>2006.10.005  |
| Shaker | V | 467 | A | GOF     | -7.9  |     |  |  |  |  |  |            |  |                  |  |  |  | 10.1016/s0092-<br>8674(02)01013-9 |
| Shaker | V | 474 | A | GOF     | -17.1 |     |  |  |  |  |  |            |  |                  |  |  |  | 10.1085/jgp.2002<br>8569.         |
| Shaker | V | 474 | D | LOF     |       |     |  |  |  |  |  |            |  | not<br>expressed |  |  |  | 10.1085/jgp.2002<br>8569.         |
| Shaker | V | 474 | W | LOF     |       |     |  |  |  |  |  |            |  | not<br>expressed |  |  |  | 10.1085/jgp.2002<br>8569.         |
| Shaker | V | 474 | W | LOF     |       |     |  |  |  |  |  | no current |  |                  |  |  |  | 10.1016/j.neuron.<br>2006.10.005  |
| Shaker | V | 476 | A | GOF     | -35.5 |     |  |  |  |  |  |            |  |                  |  |  |  | 10.1016/s0092-<br>8674(02)01013-9 |
| Shaker | V | 476 | A | GOF     | -22.9 |     |  |  |  |  |  |            |  |                  |  |  |  | 10.1085/jgp.2002<br>8569.         |

|        |   |     |   |         |       |  |  |  |  |            |     |  |               |                             |  |                               |
|--------|---|-----|---|---------|-------|--|--|--|--|------------|-----|--|---------------|-----------------------------|--|-------------------------------|
| Shaker | V | 476 | W | GOF     | -22.9 |  |  |  |  |            |     |  |               |                             |  | 10.1085/jgp.20028569.         |
| Shaker | V | 478 | A | GOF     | -11.4 |  |  |  |  |            |     |  |               |                             |  | 10.1085/jgp.20028569.         |
| Shaker | V | 478 | D | LOF     |       |  |  |  |  |            |     |  | not expressed |                             |  | 10.1085/jgp.20028569.         |
| Shaker | V | 478 | W | LOF     |       |  |  |  |  | no current |     |  |               |                             |  | 10.1085/jgp.20028569.         |
| Shaker | W | 434 | A | LOF     |       |  |  |  |  |            |     |  | not expressed |                             |  | 10.1016/s0092-8674(02)01013-9 |
| Shaker | W | 434 | F | LOF     |       |  |  |  |  | no current |     |  |               |                             |  | 10.1085/jgp.109.6779          |
| Shaker | W | 434 | F | LOF     |       |  |  |  |  | no current |     |  |               |                             |  | 10.1016/0896-6273(93)90190-3  |
| Shaker | W | 434 | S | LOF     |       |  |  |  |  | no current |     |  |               |                             |  | 10.1038/349700a0              |
| Shaker | W | 435 | A | LOF     |       |  |  |  |  |            |     |  | not expressed |                             |  | 10.1016/s0092-8674(02)01013-9 |
| Shaker | W | 435 | S | LOF     |       |  |  |  |  | no current |     |  |               |                             |  | 10.1038/349700a0              |
| Shaker | W | 454 | A | GOF     | -2    |  |  |  |  |            |     |  |               |                             |  | 10.1016/s0092-8674(02)01013-9 |
| Shaker | W | 454 | A | LOF     | 6     |  |  |  |  |            |     |  |               |                             |  | 10.1016/j.neuron.2006.10.005  |
| Shaker | Y | 483 | A | Unclear |       |  |  |  |  |            |     |  |               | two phases in the I-V curve |  | 10.1016/s0092-8674(02)01013-9 |
| Shaker | Y | 483 | A | GOF     | -4.9  |  |  |  |  |            |     |  |               |                             |  | 10.1085/jgp.20028569.         |
| Shaker | Y | 483 | C | GOF     | -4.4  |  |  |  |  |            |     |  |               |                             |  | 10.1085/jgp.20028611.         |
| Shaker | Y | 483 | D | GOF     | -11.6 |  |  |  |  |            |     |  |               |                             |  | 10.1085/jgp.20028569.         |
| Shaker | Y | 483 | W | Neutral | -0.6  |  |  |  |  |            |     |  |               |                             |  | 10.1085/jgp.20028569.         |
| Shaker | Y | 485 | A | LOF     | 3.5   |  |  |  |  |            |     |  |               |                             |  | 10.1016/s0092-8674(02)01013-9 |
| Shaker | Y | 485 | A | LOF     | 4.4   |  |  |  |  |            |     |  |               |                             |  | 10.1085/jgp.20028569.         |
| Shaker | Y | 485 | A | LOF     | 4.4   |  |  |  |  |            |     |  |               |                             |  | 10.1085/jgp.20028569.         |
| Shaker | Y | 485 | C | LOF     | 1.2   |  |  |  |  |            |     |  |               |                             |  | 10.1085/jgp.20028611.         |
| Shaker | Y | 485 | W | GOF     | -13.4 |  |  |  |  |            |     |  |               |                             |  | 10.1085/jgp.20028569.         |
| KCNA4  | R | 89  | Q | LOF     |       |  |  |  |  |            | -3  |  |               |                             |  | 10.1136/jmedgenet-2015-103637 |
| KCNA4  | T | 330 | S | Neutral |       |  |  |  |  |            | 139 |  |               | surface expression 65%      |  | 10.1074/jbc.M708921200        |

|       |   |     |   |         |       |       |  |        |      |        |  |         |                                                     |                            |
|-------|---|-----|---|---------|-------|-------|--|--------|------|--------|--|---------|-----------------------------------------------------|----------------------------|
| KCNA4 | T | 330 | K | LOF     |       |       |  |        |      | -1053  |  | reduced | surface expression 21%, variant fails to inactivate | 10.1074/jbc.M708921200     |
| KCNA4 | T | 330 | A | LOF     |       |       |  |        |      | -1234  |  | reduced | surface expression 9%                               | 10.1074/jbc.M708921200     |
| KCNA4 | E | 502 | V | LOF     |       |       |  |        |      | -1251  |  | reduced | surface expression 7%                               | 10.1074/jbc.M708921200     |
| KCNA4 | E | 502 | D | LOF     |       |       |  |        |      |        |  | reduced | surface expression 30%                              | 10.1074/jbc.M708921200     |
| KCNA4 | E | 502 | T | LOF     |       |       |  |        |      | -1252  |  | reduced | surface expression 28%                              | 10.1074/jbc.M708921200     |
| KCNA4 | E | 502 | K | LOF     |       |       |  |        |      | -1225  |  | reduced | surface expression 9%                               | 10.1074/jbc.M708921200     |
| KCNA5 | A | 115 | V | Neutral | -0.6  |       |  | -1.6   |      | 13     |  |         |                                                     | 10.1016/j.clpt.2004.10.008 |
| KCNA5 | A | 251 | T | Neutral | 0.7   |       |  | 1.4    |      | 24     |  |         |                                                     | 10.1016/j.clpt.2004.10.008 |
| KCNA5 | P | 307 | S | Neutral | -1.2  |       |  | -0.9   |      | 18     |  |         |                                                     | 10.1016/j.clpt.2004.10.008 |
| KCNA5 | P | 310 | L | Neutral | -3.1  |       |  | -1.4   |      | -8     |  |         |                                                     | 10.1016/j.clpt.2004.10.008 |
| KCNA5 | P | 532 | L | Neutral | -0.5  |       |  | -9.9   |      | 11     |  |         | drug resistant                                      | 10.1016/j.clpt.2004.10.008 |
| KCNA5 | R | 578 | K | LOF     | 9.1   |       |  | -2.3   |      | 17     |  |         | drug resistant                                      | 10.1016/j.clpt.2004.10.008 |
| KCNA5 | P | 532 | L | Neutral | -0.4  |       |  | -8.06  |      | -6     |  |         |                                                     | 10.1172/JCI23741           |
| KCNA5 | P | 532 | G | Neutral | 5     |       |  | -4.24  |      | 1      |  |         |                                                     | 10.1172/JCI23741           |
| KCNA5 | P | 532 | A | Neutral | 3.4   |       |  | -10.01 |      | -5     |  |         |                                                     | 10.1172/JCI23741           |
| KCNA5 | P | 532 | E | Neutral | 2.66  |       |  | -0.73  |      | -8     |  |         |                                                     | 10.1172/JCI23741           |
| KCNA5 | P | 532 | M | LOF     | 20.49 |       |  | 0.1    |      | 6      |  |         |                                                     | 10.1172/JCI23741           |
| KCNA5 | P | 532 | S | Neutral | 9.69  |       |  | -0.63  |      | -15    |  |         |                                                     | 10.1172/JCI23741           |
| KCNA5 | E | 48  | G | GOF     | -3.77 | -0.16 |  | 0.3    | 2.33 | 175.2  |  |         |                                                     | 10.1093/eurheartj/ehs442   |
| KCNA5 | A | 305 | T | GOF     | -5.36 | -0.54 |  | -0.64  | 4.46 | 233.5  |  |         |                                                     | 10.1093/eurheartj/ehs442   |
| KCNA5 | D | 322 | H | GOF     | -4.7  | -2    |  | -0.83  | 7.85 | 438.9  |  |         |                                                     | 10.1093/eurheartj/ehs442   |
| KCNA5 | Y | 155 | C | LOF     | -0.08 | -2.91 |  | -0.39  | 3.39 | -246   |  |         |                                                     | 10.1093/eurheartj/ehs442   |
| KCNA5 | P | 488 | S | LOF     | -0.18 | -0.31 |  | 0.01   | 2.99 | -218   |  |         |                                                     | 10.1093/eurheartj/ehs442   |
| KCNA5 | D | 469 | E | LOF     | 4.82  | -0.21 |  |        |      | -474.1 |  |         |                                                     | 10.1093/eurheartj/ehs442   |

|       |   |     |   |     |      |      |  |     |     |        |  |         |                                                                               |                                           |
|-------|---|-----|---|-----|------|------|--|-----|-----|--------|--|---------|-------------------------------------------------------------------------------|-------------------------------------------|
| KCNA5 | T | 527 | M | LOF |      |      |  |     |     | -2     |  |         | reduced current, exact value not available                                    | 10.3760/CMA.J.I SSN.0376-2491.2010.16.007 |
| KCNA5 | T | 527 | M | LOF |      |      |  |     |     | -28.45 |  |         |                                                                               | 10.1038/jhg.2009.26                       |
| KCNA5 | A | 576 | V | LOF |      |      |  |     |     | -52.28 |  |         |                                                                               | 10.1038/jhg.2009.26                       |
| KCNA5 | E | 610 | K | LOF |      |      |  |     |     | -57.73 |  |         |                                                                               | 10.1038/jhg.2009.26                       |
| KCNA5 | H | 463 | R | LOF | 1.5  | -1.4 |  |     |     | -437   |  |         |                                                                               | 10.1161/CIRCEP.114.002519                 |
| KCNA5 | T | 527 | M | GOF | -4.6 | -0.2 |  |     |     | 353    |  |         |                                                                               | 10.1161/CIRCEP.114.002519                 |
| KCNB1 | R | 306 | C | LOF | 0.8  | 10.4 |  |     |     | 0      |  |         | slow activation, severe reduction of repetitive firing                        | 10.1038/srep15199                         |
| KCNB1 | G | 401 | R | LOF | 7.2  | 7    |  |     |     | -0.9   |  |         | fast inactivation (92.7 ms vs 145.7 ms), reduced repetitive firing            | 10.1038/srep15199                         |
| KCNB1 | I | 199 | F | LOF | 9    | -4.5 |  | 1.4 | 3.1 | -50.8  |  |         |                                                                               | 10.1212/NXG.00000000000198                |
| KCNB1 | V | 378 | A | GOF |      |      |  |     |     |        |  | reduced | loss of ion selectivity, faster inactivation, large tail current              | 10.1085/jgp.201511444                     |
| KCNB1 | S | 347 | R | LOF | 6.9  | 1.5  |  |     |     | -160   |  |         | loss of ion selectivity, slower activation, conductance estimated from figure | 10.1002/ana.24263                         |
| KCNB1 | G | 379 | R | LOF | 5.4  | 0.8  |  |     |     | -280   |  |         | loss of ion selectivity, slower activation, conductance estimated from figure | 10.1002/ana.24263                         |
| KCNB1 | T | 374 | I | LOF | 6    | 1.3  |  |     |     | -280   |  |         | loss of ion selectivity, slower activation, conductance estimated from figure | 10.1002/ana.24263                         |
| KCNB1 | S | 202 | F | LOF | 8.6  | 9.3  |  | 4.1 | 10  | 0      |  |         | high throughput assay, current density estimated from figure                  | 10.1002/ana.25607                         |

|                |   |     |   |         |      |      |  |      |       |       |            |         |                                                    |                    |
|----------------|---|-----|---|---------|------|------|--|------|-------|-------|------------|---------|----------------------------------------------------|--------------------|
| <i>KCNBI</i>   | T | 210 | K | LOF     |      |      |  |      |       | -0.99 |            |         |                                                    | 10.1002/ana.25607  |
| <i>KCNBI</i>   | T | 210 | M | LOF     | 0.4  | 0    |  | 0.2  | -3.7  | 0     |            | reduced |                                                    | 10.1002/ana.25607  |
| <i>KCNBI</i>   | R | 306 | C | LOF     |      |      |  |      |       | -0.98 |            |         |                                                    | 10.1002/ana.25607  |
| <i>KCNBI</i>   | R | 312 | C | LOF     |      |      |  |      |       | -0.95 |            |         |                                                    | 10.1002/ana.25607  |
| <i>KCNBI</i>   | R | 312 | H | LOF     |      |      |  |      |       | -0.4  |            |         |                                                    | 10.1002/ana.25607  |
| <i>KCNBI</i>   | R | 325 | Q | Neutral | -3.4 | -0.1 |  | -0.4 | -3.8  | 0     |            | reduced |                                                    | 10.1002/ana.25607  |
| <i>KCNBI</i>   | R | 325 | W | GOF     | -7   | 3.2  |  | -0.4 | -12.3 | 0     |            |         |                                                    | 10.1002/ana.25607  |
| <i>KCNBI</i>   | E | 330 | D | LOF     | -5.1 | 2.4  |  | 1.1  | -0.8  | 0     |            | reduced |                                                    | 10.1002/ana.25607  |
| <i>KCNBI</i>   | W | 370 | R | LOF     | 3.8  | 3.5  |  | 0.6  | 0.7   | -0.9  |            | reduced |                                                    | 10.1002/ana.25607  |
| <i>KCNBI</i>   | V | 378 | A | LOF     | -0.2 | 0.4  |  | -0.7 | -1.8  | 0     |            | reduced |                                                    | 10.1002/ana.25607  |
| <i>KCNBI</i>   | V | 378 | L | LOF     | 1.5  | 3.1  |  | 1.2  | -6.8  | -0.5  |            | reduced |                                                    | 10.1002/ana.25607  |
| <i>KCNBI</i>   | G | 381 | R | LOF     | -2.1 | 1.3  |  | 0    | -1.6  | 0     |            | reduced |                                                    | 10.1002/ana.25607  |
| <i>KCNBI</i>   | P | 385 | T | LOF     | 0.6  | 2    |  | 0.6  | -1    | -0.9  |            | reduced |                                                    | 10.1002/ana.25607  |
| <i>KCNBI</i>   | K | 391 | N | LOF     | -2.1 | -0.3 |  | -0.4 | -1.8  | 0     |            | reduced |                                                    | 10.1002/ana.25607  |
| <i>KCNBI</i>   | F | 416 | L | LOF     | 4.2  | 2.7  |  | 1    | 0.1   | -0.9  |            | reduced |                                                    | 10.1002/ana.25607  |
| <i>KCNBI</i>   | S | 457 | R | GOF     | -8.4 |      |  |      |       |       |            |         |                                                    | 10.1002/ana.25607  |
| <i>KCNCI</i>   | R | 320 | H | LOF     |      |      |  |      |       | -1    |            |         |                                                    | 10.1038/ng.3144    |
| <i>KCNCI</i>   | A | 421 | V | LOF     |      |      |  |      |       | -1    | no current |         | homozygous variant has no current above background | 10.1002/acn3.50822 |
| <i>KCNCI</i>   | R | 317 | H | LOF     |      |      |  |      |       | -1    | no current |         |                                                    | 10.1002/acn3.50822 |
| <i>KCNCI</i>   | Q | 339 | X | LOF     |      |      |  |      |       | -1    | no current |         |                                                    | 10.1002/acn3.50822 |
| <i>KCNCI</i>   | Q | 492 | X | LOF     | -8   | -0.1 |  |      |       | -0.5  |            |         |                                                    | 10.1002/acn3.50822 |
| <i>KCNCI B</i> | A | 513 | V | Neutral | -4.8 | -1.8 |  |      |       | 0     |            |         |                                                    | 10.1002/acn3.50822 |
| <i>KCNCI</i>   | C | 208 | Y | LOF     |      |      |  |      |       | -1    |            |         |                                                    | 10.1002/acn3.50799 |

|               |   |     |   |         |       |      |      |  |  |       |            |         |  |                                                                                                                     |                              |
|---------------|---|-----|---|---------|-------|------|------|--|--|-------|------------|---------|--|---------------------------------------------------------------------------------------------------------------------|------------------------------|
| <i>KCNC1</i>  | T | 399 | M | LOF     |       |      |      |  |  | -1    |            |         |  | dominant negative                                                                                                   | 10.1002/acn3.50799           |
| <i>KCNC1</i>  | A | 421 | V | LOF     |       |      |      |  |  | -1    |            |         |  | dominant negative                                                                                                   | 10.1002/acn3.50799           |
| <i>KCNC1B</i> | R | 320 | H | LOF     | 5.3   |      |      |  |  | 0     |            |         |  | slower activation, other complex effects                                                                            | 10.1111/epi.16867            |
| <i>KCNC1</i>  | W | 392 | F | LOF     |       |      |      |  |  | -1    | no current |         |  |                                                                                                                     | 10.1111/epi.16867            |
| <i>KCNC2</i>  | D | 167 | Y | GOF     |       |      |      |  |  | -0.5  |            |         |  | hyperpolarized shift of the voltage dependence of activation and altered slope factor, but no exact values provided | 10.1055/s-0040-1710524       |
| <i>KCNC3</i>  | R | 420 | H | LOF     |       |      |      |  |  | -0.9  |            |         |  | currents estimated from figure                                                                                      | 10.1038/ng1758               |
| <i>KCNC3</i>  | F | 448 | L | GOF     | -12.4 | 0    | 11.3 |  |  |       |            |         |  | label uncertain, mutation increases open state probability, but also increases interspike interval                  | 10.1038/ng1758               |
| <i>KCNC3</i>  | R | 423 | H | LOF     |       |      |      |  |  | -1    |            |         |  | currents estimated from figure                                                                                      | 10.1002/humu.21165           |
| <i>KCNC3</i>  | R | 366 | H | LOF     |       |      |      |  |  | -0.9  |            |         |  | currents estimated from figure                                                                                      | 10.1002/humu.21165           |
| <i>KCNC3</i>  | R | 420 | H | LOF     |       |      |      |  |  | -1    |            |         |  |                                                                                                                     | 10.1113/jphysiol.2012.228205 |
| <i>KCNC3</i>  | R | 423 | H | GOF     | -16.5 | 1.6  |      |  |  | -0.92 |            |         |  |                                                                                                                     | 10.1113/jphysiol.2012.228205 |
| <i>KCNC3</i>  | F | 448 | L | GOF     | -16.5 | 0.6  | 78.7 |  |  |       |            |         |  |                                                                                                                     | 10.1113/jphysiol.2012.228205 |
| <i>KCNC3</i>  | W | 495 | F | LOF     |       |      |      |  |  |       | no current |         |  | abolished ionic conductance through the central pore                                                                | 10.1113/jphysiol.2012.228205 |
| <i>KCNC3</i>  | R | 420 | H | LOF     |       |      |      |  |  |       |            | reduced |  | additional data on post-translational modifications                                                                 | 10.1016/j.nbd.2014.08.020    |
| <i>KCNC3</i>  | D | 129 | N | GOF     | -9.25 | -2.1 |      |  |  | 877   |            |         |  | labels uncertain and not provided by author                                                                         | 10.1371/journal.pone.0116599 |
| <i>KCNC3</i>  | D | 477 | N | Neutral | -0.67 | -2   |      |  |  | 872   |            |         |  |                                                                                                                     | 10.1371/journal.pone.0116599 |



|       |   |     |   |         |        |      |  |      |       |       |  |  |                                                   |                              |
|-------|---|-----|---|---------|--------|------|--|------|-------|-------|--|--|---------------------------------------------------|------------------------------|
| KCNC3 | V | 535 | M | GOF     | -31.06 | 2.7  |  |      |       | 706   |  |  |                                                   | 10.1371/journal.pone.0116599 |
| KCNC3 | S | 591 | G | LOF     | 16.34  | -2.7 |  |      |       | -2050 |  |  |                                                   | 10.1371/journal.pone.0116599 |
| KCNC3 | G | 643 | S | Neutral | -6.36  | 0.1  |  |      |       | 1025  |  |  |                                                   | 10.1371/journal.pone.0116599 |
| KCNC3 | P | 645 | R | Neutral | -5.72  | 0.4  |  |      |       | -725  |  |  |                                                   | 10.1371/journal.pone.0116599 |
| KCNC3 | D | 746 | N | Neutral | 1.84   | -1.8 |  |      |       | 840   |  |  |                                                   | 10.1371/journal.pone.0116599 |
| KCNC3 | T | 428 | I | LOF     |        |      |  |      |       | -11.9 |  |  | currents estimated from figure, slower activation | 10.1093/brain/awv117         |
| KCND2 | E | 323 | K | LOF     |        |      |  |      |       |       |  |  | pre-print, data not released yet                  | 10.1093/hmg/dda b192         |
| KCND2 | P | 403 | A | Unclear |        |      |  |      |       |       |  |  | pre-print, data not released yet                  | 10.1093/hmg/dda b192         |
| KCND2 | V | 404 | L | Unclear |        |      |  |      |       |       |  |  | pre-print, data not released yet                  | 10.1093/hmg/dda b192         |
| KCND2 | V | 404 | M | Unclear |        |      |  |      |       |       |  |  | pre-print, data not released yet                  | 10.1093/hmg/dda b192         |
| KCND2 | V | 404 | M | GOF     |        |      |  |      |       |       |  |  | significantly slowed inactivation                 | 10.1093/hmg/ddu 056          |
| KCND2 | G | 309 | A | GOF     | -9.2   | 1.9  |  | -0.7 | -7.8  | 7.7   |  |  |                                                   | 10.1093/hmg/dda b192         |
| KCND2 | L | 310 | A | LOF     | 123.5  | 41.6 |  | 6.2  | 47.2  | -2.4  |  |  |                                                   | 10.1093/hmg/dda b192         |
| KCND2 | R | 311 | A | LOF     | 18.6   | 2.5  |  | -0.1 | 18.7  | 0.1   |  |  |                                                   | 10.1093/hmg/dda b192         |
| KCND2 | I | 312 | A | GOF     | 6.3    | 0.3  |  | 1.8  | -5.4  | 10.1  |  |  |                                                   | 10.1093/hmg/dda b192         |
| KCND2 | L | 313 | A | LOF     | 4.5    | 4.6  |  | 1.1  | -10.6 | -0.5  |  |  |                                                   | 10.1093/hmg/dda b192         |
| KCND2 | G | 314 | A | Neutral |        |      |  |      |       |       |  |  |                                                   | 10.1093/hmg/dda b192         |
| KCND2 | Y | 315 | A | GOF     | 1.2    | 2.5  |  | -0.4 | 4.1   | 6.3   |  |  |                                                   | 10.1093/hmg/dda b192         |
| KCND2 | T | 316 | A | LOF     | 4.2    | 2.5  |  | 0.9  | -5.8  | 1.6   |  |  |                                                   | 10.1093/hmg/dda b192         |
| KCND2 | L | 317 | A | LOF     | 14.1   | 3.5  |  | 1.7  | -5.7  | 1.3   |  |  |                                                   | 10.1093/hmg/dda b192         |
| KCND2 | K | 318 | A | LOF     | 7.7    | 3.7  |  | -0.5 | -0.8  | 1.6   |  |  |                                                   | 10.1093/hmg/dda b192         |
| KCND2 | S | 319 | A | LOF     |        |      |  |      |       | -3.57 |  |  |                                                   | 10.1093/hmg/dda b192         |

|       |   |     |   |         |       |      |  |      |       |       |  |  |  |                         |
|-------|---|-----|---|---------|-------|------|--|------|-------|-------|--|--|--|-------------------------|
| KCND2 | C | 320 | A | LOF     | 13.6  | 4.1  |  | -0.9 | 1     | 1.5   |  |  |  | 10.1093/hmg/dda<br>b192 |
| KCND2 | C | 320 | S | GOF     | -0.3  | 10.8 |  | -1   | -0.5  | 9.1   |  |  |  | 10.1093/hmg/dda<br>b192 |
| KCND2 | A | 321 | V | GOF     | -16.7 | 0.7  |  | -0.9 | -1.5  | 1.4   |  |  |  | 10.1093/hmg/dda<br>b192 |
| KCND2 | S | 322 | A | LOF     | 13.2  | -0.2 |  | -0.1 | 14.2  | 4     |  |  |  | 10.1093/hmg/dda<br>b192 |
| KCND2 | E | 323 | A | GOF     | -10.1 | -1.2 |  | 0.9  | -12.2 | 0.5   |  |  |  | 10.1093/hmg/dda<br>b192 |
| KCND2 | L | 324 | A | LOF     |       |      |  |      |       | -3.64 |  |  |  | 10.1093/hmg/dda<br>b192 |
| KCND2 | G | 325 | A | GOF     | 0.9   | 0    |  | 0.4  | 2     | 7.4   |  |  |  | 10.1093/hmg/dda<br>b192 |
| KCND2 | F | 326 | A | LOF     | 2.9   | 0.6  |  | 1    | 21    | -1.5  |  |  |  | 10.1093/hmg/dda<br>b192 |
| KCND2 | L | 327 | A | Neutral |       |      |  |      |       |       |  |  |  | 10.1093/hmg/dda<br>b192 |
| KCND2 | L | 328 | A | LOF     |       |      |  |      |       | -3.65 |  |  |  | 10.1093/hmg/dda<br>b192 |
| KCND2 | F | 329 | A | Neutral |       |      |  |      |       |       |  |  |  | 10.1093/hmg/dda<br>b192 |
| KCND2 | V | 397 | A | LOF     | 122.5 | 85.6 |  |      |       | -2.9  |  |  |  | 10.1093/hmg/dda<br>b192 |
| KCND2 | I | 398 | A | Neutral |       |      |  |      |       |       |  |  |  | 10.1093/hmg/dda<br>b192 |
| KCND2 | A | 399 | V | LOF     |       |      |  |      |       | -3.6  |  |  |  | 10.1093/hmg/dda<br>b192 |
| KCND2 | L | 400 | A | LOF     | -4.6  | 9.8  |  | 5    | -25.2 | -2.5  |  |  |  | 10.1093/hmg/dda<br>b192 |
| KCND2 | P | 401 | A | LOF     |       |      |  |      |       | -3.4  |  |  |  | 10.1093/hmg/dda<br>b192 |
| KCND2 | V | 402 | A | Unclear | -6.6  | 3    |  | 3.9  | 7.7   | -1.4  |  |  |  | 10.1093/hmg/dda<br>b192 |
| KCND2 | P | 403 | A | Neutral |       |      |  |      |       |       |  |  |  | 10.1093/hmg/dda<br>b192 |
| KCND2 | V | 404 | A | Unclear | 6.1   | 4.6  |  | 4.3  | -28.3 | 1     |  |  |  | 10.1093/hmg/dda<br>b192 |
| KCND2 | I | 405 | A | Neutral |       |      |  |      |       |       |  |  |  | 10.1093/hmg/dda<br>b192 |
| KCND2 | V | 406 | A | Neutral |       |      |  |      |       |       |  |  |  | 10.1093/hmg/dda<br>b192 |
| KCND2 | S | 407 | A | GOF     | 0.1   | 0.7  |  | 0    | 5.9   | 5.8   |  |  |  | 10.1093/hmg/dda<br>b192 |
| KCND2 | N | 408 | A | LOF     | 21.4  | 2.5  |  | -0.2 | 10.7  | -1.1  |  |  |  | 10.1093/hmg/dda<br>b192 |

|       |   |     |   |         |     |     |  |     |       |      |  |  |  |  |  |                                                                                      |                                     |
|-------|---|-----|---|---------|-----|-----|--|-----|-------|------|--|--|--|--|--|--------------------------------------------------------------------------------------|-------------------------------------|
| KCND2 | F | 409 | A | LOF     |     |     |  |     |       | -3.3 |  |  |  |  |  |                                                                                      | 10.1093/hmg/dda<br>b192             |
| KCND2 | S | 410 | A | LOF     | 5.2 | 1.7 |  | 0.4 | 1.6   | 0.3  |  |  |  |  |  |                                                                                      | 10.1093/hmg/dda<br>b192             |
| KCND2 | R | 411 | A | Unclear | 1   | 1.3 |  | 0.6 | 3.7   | 1.5  |  |  |  |  |  |                                                                                      | 10.1093/hmg/dda<br>b192             |
| KCND2 | I | 412 | A | Unclear | 1   | 3.1 |  | 0   | -13.3 | 0.6  |  |  |  |  |  |                                                                                      | 10.1093/hmg/dda<br>b192             |
| KCND2 | Y | 413 | A | Unclear | 2   | 1.6 |  | 1.1 | 4.3   | 1.2  |  |  |  |  |  |                                                                                      | 10.1093/hmg/dda<br>b192             |
| KCND3 | Y | 241 | C | LOF     |     |     |  |     |       |      |  |  |  |  |  | reduced<br>amplitude,<br>dominant negative                                           | own data provided<br>by Uli Hedrich |
| KCND3 | V | 338 | E | LOF     |     |     |  |     |       |      |  |  |  |  |  | reduced amplitude                                                                    | own data provided<br>by Uli Hedrich |
| KCND3 | G | 345 | V | LOF     |     |     |  |     |       |      |  |  |  |  |  | reduced amplitude                                                                    | own data provided<br>by Uli Hedrich |
| KCND3 | S | 347 | W | LOF     |     |     |  |     |       |      |  |  |  |  |  | reduced amplitude                                                                    | own data provided<br>by Uli Hedrich |
| KCND3 | T | 352 | P | LOF     |     |     |  |     |       |      |  |  |  |  |  | reduced amplitude                                                                    | own data provided<br>by Uli Hedrich |
| KCND3 | W | 359 | G | LOF     |     |     |  |     |       |      |  |  |  |  |  | reduced amplitude                                                                    | own data provided<br>by Uli Hedrich |
| KCND3 | G | 371 | R | LOF     |     |     |  |     |       |      |  |  |  |  |  | reduced amplitude                                                                    | own data provided<br>by Uli Hedrich |
| KCND3 | M | 373 | I | LOF     |     |     |  |     |       |      |  |  |  |  |  | reduced amplitude                                                                    | own data provided<br>by Uli Hedrich |
| KCND3 | V | 374 | A | LOF     |     |     |  |     |       |      |  |  |  |  |  | reduced amplitude                                                                    | own data provided<br>by Uli Hedrich |
| KCND3 | G | 384 | S | LOF     |     |     |  |     |       |      |  |  |  |  |  | reduced amplitude                                                                    | own data provided<br>by Uli Hedrich |
| KCND3 | S | 390 | N | LOF     |     |     |  |     |       |      |  |  |  |  |  | reduced amplitude                                                                    | own data provided<br>by Uli Hedrich |
| KCND3 | R | 431 | C | LOF     |     |     |  |     |       |      |  |  |  |  |  | reduced amplitude                                                                    | own data provided<br>by Uli Hedrich |
| KCND3 | C | 317 | Y | LOF     |     |     |  |     |       |      |  |  |  |  |  | reduced<br>amplitude, right<br>shift of activation,<br>left shift of<br>inactivation | own data provided<br>by Uli Hedrich |
| KCND3 | P | 375 | S | LOF     |     |     |  |     |       |      |  |  |  |  |  | reduced<br>amplitude, right<br>shift of activation,<br>no change in<br>inactivation  | own data provided<br>by Uli Hedrich |
| KCND3 | T | 377 | M | LOF     |     |     |  |     |       |      |  |  |  |  |  | reduced<br>amplitude, right                                                          | own data provided<br>by Uli Hedrich |

|              |   |     |   |         |       |     |      |  |  |  |     |  |  |                                                                                                                          |                                     |
|--------------|---|-----|---|---------|-------|-----|------|--|--|--|-----|--|--|--------------------------------------------------------------------------------------------------------------------------|-------------------------------------|
|              |   |     |   |         |       |     |      |  |  |  |     |  |  | shift of activation,<br>no change in<br>inactivation                                                                     |                                     |
| <i>KCND3</i> | S | 283 | F | Unclear |       |     |      |  |  |  |     |  |  | reduced<br>amplitude, right<br>shift of activation<br>and inactivation                                                   | own data provided<br>by Uli Hedrich |
| <i>KCND3</i> | R | 290 | Q | Unclear |       |     |      |  |  |  |     |  |  | reduced<br>amplitude, left<br>shift of activation<br>and inactivation,<br>slowed<br>macroscopic<br>decay and<br>decovery | own data provided<br>by Uli Hedrich |
| <i>KCND3</i> | G | 391 | S | Unclear |       |     |      |  |  |  |     |  |  | reduced<br>amplitude, slowed<br>macroscopic delay                                                                        | own data provided<br>by Uli Hedrich |
| <i>KCND3</i> | G | 306 | A | Unclear |       |     |      |  |  |  |     |  |  | increased<br>amplitude, slowed<br>decay and<br>recovery                                                                  | own data provided<br>by Uli Hedrich |
| <i>KCND3</i> | T | 361 | S | Unclear |       |     |      |  |  |  |     |  |  | increased<br>amplitude, slowed<br>recovery                                                                               | own data provided<br>by Uli Hedrich |
| <i>KCND3</i> | R | 431 | H | GOF     |       |     |      |  |  |  |     |  |  | increased<br>amplitude, fast<br>recovery                                                                                 | own data provided<br>by Uli Hedrich |
| <i>KCND3</i> | L | 450 | F | GOF     |       |     |      |  |  |  |     |  |  | increased<br>amplitude                                                                                                   | own data provided<br>by Uli Hedrich |
| <i>KCND3</i> | A | 564 | P | GOF     |       |     |      |  |  |  |     |  |  | increased<br>amplitude, slowed<br>decay                                                                                  | own data provided<br>by Uli Hedrich |
| <i>KCND3</i> | G | 600 | R | GOF     |       |     |      |  |  |  |     |  |  | increased<br>amplitude, slowed<br>decay                                                                                  | own data provided<br>by Uli Hedrich |
| <i>KCND3</i> | K | 241 | R | Neutral |       |     |      |  |  |  |     |  |  |                                                                                                                          | own data provided<br>by Uli Hedrich |
| <i>KCND3</i> | S | 530 | F | Neutral |       |     |      |  |  |  |     |  |  |                                                                                                                          | own data provided<br>by Uli Hedrich |
| <i>KCND3</i> | S | 530 | P | Neutral |       |     |      |  |  |  |     |  |  |                                                                                                                          | own data provided<br>by Uli Hedrich |
| <i>KCND3</i> | P | 633 | S | Neutral |       |     |      |  |  |  |     |  |  |                                                                                                                          | own data provided<br>by Uli Hedrich |
| <i>KCNHI</i> | K | 217 | N | GOF     | -40.2 | 4.3 | 3.14 |  |  |  | 116 |  |  |                                                                                                                          | 10.1038/ng.3153                     |
| <i>KCNHI</i> | L | 489 | F | GOF     | -36.4 | 2.7 | 3.41 |  |  |  | -74 |  |  |                                                                                                                          | 10.1038/ng.3153                     |

|       |   |     |   |         |       |      |      |     |       |      |  |            |               |  |                                                |                                   |
|-------|---|-----|---|---------|-------|------|------|-----|-------|------|--|------------|---------------|--|------------------------------------------------|-----------------------------------|
| KCNH1 | I | 494 | V | GOF     | -33.9 | 4.1  | 2.55 |     |       | 90   |  |            |               |  |                                                | 10.1038/ng.3153                   |
| KCNH1 | Q | 503 | R | GOF     | -49.1 | 2.3  | 3.53 |     |       | -555 |  |            |               |  |                                                | 10.1038/ng.3153                   |
| KCNH1 | G | 348 | R | GOF     | -43.5 | 1.7  |      |     |       |      |  |            |               |  |                                                | 10.1038/ng.3282                   |
| KCNH1 | I | 467 | V | GOF     | -60.5 | 3.6  |      |     |       |      |  |            |               |  |                                                | 10.1038/ng.3282                   |
| KCNH1 | L | 352 | V | GOF     | -94.3 | 1.9  |      |     |       |      |  |            |               |  |                                                | 10.1038/ng.3282                   |
| KCNH1 | S | 325 | Y | GOF     | -47   | 1.8  |      |     |       |      |  |            |               |  |                                                | 10.1038/ng.3282                   |
| KCNH1 | V | 356 | L | GOF     | -18.6 | -0.6 |      |     |       |      |  |            |               |  |                                                | 10.1038/ng.3282                   |
| KCNH1 | G | 469 | R | GOF     |       |      |      |     |       |      |  |            |               |  | complex functional effect                      | 10.1038/ng.3282                   |
| KCNH2 | Y | 611 | H | LOF     |       |      |      |     |       |      |  |            | not expressed |  | trafficking defect                             | 10.1074/jbc.M502327200            |
| KCNH2 | Y | 611 | H | LOF     |       |      |      |     |       |      |  |            | not expressed |  | ER retained                                    | 10.1074/jbc.273.33.21061          |
| KCNH2 | V | 822 | M | LOF     |       |      |      |     |       |      |  |            | not expressed |  | ER retained                                    | 10.1074/jbc.273.33.21061          |
| KCNH2 | I | 593 | R | LOF     |       |      |      |     |       |      |  | no current |               |  | unable to form functional channels             | 10.1074/jbc.273.33.21061          |
| KCNH2 | G | 628 | S | LOF     |       |      |      |     |       |      |  | no current |               |  | unable to form functional channels             | 10.1074/jbc.273.33.21061          |
| KCNH2 | G | 628 | S | LOF     |       |      |      |     |       |      |  | no current |               |  |                                                | 10.1073/pnas.93.5.2208            |
| KCNH2 | A | 561 | V | LOF     |       |      |      |     |       |      |  | no current |               |  |                                                | 10.1073/pnas.93.5.2208            |
| KCNH2 | N | 470 | D | LOF     | -18   | -1.1 |      |     |       | -599 |  |            |               |  |                                                | 10.1073/pnas.93.5.2208            |
| KCNH2 | T | 474 | I | LOF     | 3.1   | 0.1  | 0    | 1.2 | -2.7  | -321 |  |            |               |  | dominant negative                              | 10.1161/01.res.83.4.415           |
| KCNH2 | A | 614 | V | LOF     | 3.1   | -1.7 | 0    | 0.3 | -9.3  | -645 |  |            |               |  | dominant negative                              | 10.1161/01.res.83.4.415           |
| KCNH2 | V | 630 | L | LOF     | 0.6   | -2.6 | 0    | 3   | -22.2 | -978 |  |            |               |  | dominant negative, faster inactivation         | 10.1161/01.res.83.4.415           |
| KCNH2 | A | 558 | P | LOF     |       |      | 0    |     |       | -92  |  |            | reduced       |  | dominant trafficking defect, fast inactivation | 10.1172/JCI35337                  |
| KCNH2 | I | 31  | S | LOF     |       |      |      |     |       |      |  |            | reduced       |  | large temperature-dependent trafficking study  | 10.1161/CIRCULATIONAHA.105.570200 |
| KCNH2 | R | 328 | C | Neutral | 0     | 0    | 0    |     |       | 14.1 |  |            |               |  |                                                | 10.1161/CIRCULATIONAHA.105.570200 |

|       |   |     |   |         |   |   |   |  |  |       |  |         |                               |                                   |
|-------|---|-----|---|---------|---|---|---|--|--|-------|--|---------|-------------------------------|-----------------------------------|
| KCNH2 | P | 347 | S | Neutral | 0 | 0 | 0 |  |  | -18.6 |  |         |                               | 10.1161/CIRCULATIONAHA.105.570200 |
| KCNH2 | T | 421 | M | LOF     |   |   |   |  |  |       |  |         | altered gating and permeation | 10.1161/CIRCULATIONAHA.105.570200 |
| KCNH2 | A | 422 | T | LOF     |   |   |   |  |  |       |  | reduced |                               | 10.1161/CIRCULATIONAHA.105.570200 |
| KCNH2 | T | 436 | M | Neutral | 0 | 0 | 0 |  |  | -29.1 |  |         |                               | 10.1161/CIRCULATIONAHA.105.570200 |
| KCNH2 | D | 456 | Y | LOF     |   |   |   |  |  |       |  | reduced |                               | 10.1161/CIRCULATIONAHA.105.570200 |
| KCNH2 | N | 470 | D | LOF     |   |   |   |  |  |       |  | reduced |                               | 10.1161/CIRCULATIONAHA.105.570200 |
| KCNH2 | T | 474 | I | LOF     |   |   |   |  |  |       |  | reduced |                               | 10.1161/CIRCULATIONAHA.105.570200 |
| KCNH2 | R | 534 | C | LOF     |   |   |   |  |  |       |  | reduced |                               | 10.1161/CIRCULATIONAHA.105.570200 |
| KCNH2 | A | 561 | T | LOF     |   |   |   |  |  |       |  | reduced |                               | 10.1161/CIRCULATIONAHA.105.570200 |
| KCNH2 | A | 561 | V | LOF     |   |   |   |  |  |       |  | reduced |                               | 10.1161/CIRCULATIONAHA.105.570200 |
| KCNH2 | H | 562 | P | LOF     |   |   |   |  |  |       |  | reduced |                               | 10.1161/CIRCULATIONAHA.105.570200 |
| KCNH2 | I | 571 | L | LOF     |   |   |   |  |  |       |  | reduced |                               | 10.1161/CIRCULATIONAHA.105.570200 |
| KCNH2 | G | 572 | S | LOF     |   |   |   |  |  |       |  | reduced |                               | 10.1161/CIRCULATIONAHA.105.570200 |
| KCNH2 | I | 593 | R | LOF     |   |   |   |  |  |       |  | reduced |                               | 10.1161/CIRCULATIONAHA.105.570200 |
| KCNH2 | P | 596 | R | LOF     |   |   |   |  |  |       |  | reduced |                               | 10.1161/CIRCULATIONAHA.105.570200 |
| KCNH2 | G | 601 | S | LOF     |   |   |   |  |  |       |  | reduced |                               | 10.1161/CIRCULATIONAHA.105.570200 |

|       |   |     |   |         |   |   |   |  |  |  |   |         |                               |                                   |
|-------|---|-----|---|---------|---|---|---|--|--|--|---|---------|-------------------------------|-----------------------------------|
| KCNH2 | Y | 611 | H | LOF     |   |   |   |  |  |  |   | reduced |                               | 10.1161/CIRCULATIONAHA.105.570200 |
| KCNH2 | V | 612 | L | LOF     |   |   |   |  |  |  |   | reduced |                               | 10.1161/CIRCULATIONAHA.105.570200 |
| KCNH2 | A | 614 | V | LOF     |   |   |   |  |  |  |   | reduced |                               | 10.1161/CIRCULATIONAHA.105.570200 |
| KCNH2 | T | 623 | I | LOF     |   |   |   |  |  |  |   | reduced |                               | 10.1161/CIRCULATIONAHA.105.570200 |
| KCNH2 | G | 628 | S | LOF     |   |   |   |  |  |  |   |         | altered gating and permeation | 10.1161/CIRCULATIONAHA.105.570200 |
| KCNH2 | N | 629 | D | LOF     |   |   |   |  |  |  |   | reduced |                               | 10.1161/CIRCULATIONAHA.105.570200 |
| KCNH2 | N | 629 | S | LOF     |   |   |   |  |  |  |   | reduced |                               | 10.1161/CIRCULATIONAHA.105.570200 |
| KCNH2 | V | 630 | A | LOF     |   |   |   |  |  |  |   | reduced |                               | 10.1161/CIRCULATIONAHA.105.570200 |
| KCNH2 | V | 630 | L | LOF     |   |   |   |  |  |  |   | reduced |                               | 10.1161/CIRCULATIONAHA.105.570200 |
| KCNH2 | F | 640 | V | LOF     |   |   |   |  |  |  |   | reduced |                               | 10.1161/CIRCULATIONAHA.105.570200 |
| KCNH2 | R | 752 | W | LOF     |   |   |   |  |  |  |   | reduced |                               | 10.1161/CIRCULATIONAHA.105.570200 |
| KCNH2 | F | 805 | C | LOF     |   |   |   |  |  |  |   | reduced |                               | 10.1161/CIRCULATIONAHA.105.570200 |
| KCNH2 | S | 818 | L | LOF     |   |   |   |  |  |  |   | reduced |                               | 10.1161/CIRCULATIONAHA.105.570200 |
| KCNH2 | V | 822 | M | LOF     |   |   |   |  |  |  |   | reduced |                               | 10.1161/CIRCULATIONAHA.105.570200 |
| KCNH2 | R | 823 | W | LOF     |   |   |   |  |  |  |   | reduced |                               | 10.1161/CIRCULATIONAHA.105.570200 |
| KCNH2 | R | 922 | W | Neutral | 0 | 0 | 0 |  |  |  | 5 |         |                               | 10.1161/CIRCULATIONAHA.105.570200 |

|       |   |     |   |     |      |      |      |    |      |       |            |  |                                                                                                            |                                                              |
|-------|---|-----|---|-----|------|------|------|----|------|-------|------------|--|------------------------------------------------------------------------------------------------------------|--------------------------------------------------------------|
| KCNH2 | N | 588 | K | GOF |      |      |      |    |      |       |            |  | complex mechanism                                                                                          | 10.1161/01.CIR.000109482.92774.3A                            |
| KCNH2 | K | 897 | T | GOF | -7.1 | -0.1 |      | -1 | -0.6 | 0     |            |  | faster activation, faster deactivation, no change in recovery, interesting "functional polymorphism"       | 10.1016/S0008-6363(03)00342-0                                |
| KCNH2 | R | 752 | Q | LOF |      |      |      |    |      |       | no current |  | homozygote patient, healthy heterozygote parents, no functional data for heterozygous conditions available | 10.1203/01.PDR.000059750.17002.B6                            |
| KCNH2 | L | 552 | S | LOF | -8.4 |      | -503 |    |      | 0     |            |  | faster activation , another rare homozygote                                                                | 10.1016/S0735-1097(00)00636-7                                |
| KCNH2 | T | 65  | P | LOF | 0    | 0    |      |    |      |       | reduced    |  | faster activation, faster deactivation, trafficking defect                                                 | 10.1074/jbc.M206569200                                       |
| KCNH2 | R | 784 | W | LOF | 13.3 |      |      |    |      | -28.1 |            |  |                                                                                                            | 10.1161/01.CIR.000014448.19052.4C                            |
| KCNH2 | A | 490 | T | LOF | 0    | 0    |      |    |      | -34   |            |  |                                                                                                            | 10.1002/1096-8628(20010201)98:4<348::AID-AJMG1109>3.0.CO;2-A |
| KCNH2 | F | 29  | L | LOF |      |      |      |    |      |       |            |  | faster deactivation                                                                                        | 10.1074/jbc.274.15.10113                                     |
| KCNH2 | N | 33  | T | LOF | 7.5  |      |      |    |      |       |            |  | faster deactivation, slower activation                                                                     | 10.1074/jbc.274.15.10113                                     |
| KCNH2 | G | 53  | R | LOF |      |      |      |    |      |       |            |  | faster deactivation                                                                                        | 10.1074/jbc.274.15.10113                                     |
| KCNH2 | R | 56  | Q | LOF | 11.3 | 0.2  |      |    |      |       |            |  | faster deactivation, slower activation                                                                     | 10.1074/jbc.274.15.10113                                     |
| KCNH2 | C | 66  | G | LOF |      |      |      |    |      |       |            |  | faster deactivation                                                                                        | 10.1074/jbc.274.15.10113                                     |
| KCNH2 | H | 70  | R | LOF | 0    | 0    |      |    |      |       |            |  | faster deactivation                                                                                        | 10.1074/jbc.274.15.10113                                     |



|       |   |     |   |         |      |      |      |      |      |      |            |         |                                                                   |                                 |
|-------|---|-----|---|---------|------|------|------|------|------|------|------------|---------|-------------------------------------------------------------------|---------------------------------|
| KCNH2 | A | 78  | P | LOF     |      |      |      |      |      |      |            |         | faster deactivation                                               | 10.1074/jbc.274.15.10113        |
| KCNH2 | L | 86  | R | LOF     | 0    | 0    |      |      |      |      |            |         | faster deactivation                                               | 10.1074/jbc.274.15.10113        |
| KCNH2 | V | 612 | L | LOF     | 1    | -1   |      |      |      |      |            | reduced | decrease in surface expression, variable dominant-negative effect | 10.1161/hc3501.093815           |
| KCNH2 | T | 613 | M | LOF     | 2    | 0.5  |      |      |      |      |            | reduced | decrease in surface expression, variable dominant-negative effect | 10.1161/hc3501.093815           |
| KCNH2 | L | 615 | V | LOF     | -2   | -0.8 |      |      |      |      |            | reduced | decrease in surface expression, variable dominant-negative effect | 10.1161/hc3501.093815           |
| KCNH2 | K | 28  | E | LOF     | -2.7 | -0.8 | -102 | -1.1 | 7.8  |      |            |         |                                                                   | 10.1074/jbc.M110.205948         |
| KCNH2 | N | 33  | T | LOF     | 3.5  | 1.4  | -75  | -3.9 | 11.5 |      |            |         |                                                                   | 10.1074/jbc.M110.205948         |
| KCNH2 | R | 56  | Q | LOF     | -3.3 | 1.7  | -144 | -7.8 | 26.6 |      |            |         |                                                                   | 10.1074/jbc.M110.205948         |
| KCNH2 | M | 124 | R | LOF     | 0    | -0.1 | -105 | -3.3 | 13.6 |      |            |         |                                                                   | 10.1074/jbc.M110.205948         |
| KCNH2 | F | 29  | L | LOF     | 0.3  | 0.6  | -109 |      |      |      |            |         |                                                                   | 10.1074/jbc.M110.205948         |
| KCNH2 | G | 53  | R | Neutral | 3.2  | 1.1  |      |      |      |      |            |         |                                                                   | 10.1074/jbc.M110.205948         |
| KCNH2 | H | 70  | R | Neutral | 1.5  | 1    |      |      |      |      |            |         |                                                                   | 10.1074/jbc.M110.205948         |
| KCNH2 | A | 78  | P | LOF     | 3.1  | 1.6  |      |      |      |      |            |         |                                                                   | 10.1074/jbc.M110.205948         |
| KCNH2 | Y | 43  | C | LOF     |      |      |      |      |      |      |            |         | not expressed                                                     | 10.1074/jbc.M110.205948         |
| KCNH2 | C | 66  | G | LOF     |      |      |      |      |      |      | no current |         |                                                                   | 10.1074/jbc.M110.205948         |
| KCNH2 | L | 86  | R | LOF     |      |      |      |      |      |      |            |         | not expressed                                                     | 10.1074/jbc.M110.205948         |
| KCNH2 | T | 618 | I | GOF     |      |      |      |      |      | 5.14 |            |         |                                                                   | 10.1016/j.yjmcc.2010.11.017     |
| KCNH2 | N | 985 | S | GOF     |      |      |      |      |      | 0.45 |            |         |                                                                   | 10.1016/j.cardiores.2005.06.027 |

|              |   |     |   |         |       |       |         |  |        |  |            |                                        |  |                                 |
|--------------|---|-----|---|---------|-------|-------|---------|--|--------|--|------------|----------------------------------------|--|---------------------------------|
| <i>KCNH2</i> | G | 873 | S | GOF     |       |       |         |  | 0.64   |  |            |                                        |  | 10.1016/j.cardiores.2005.06.027 |
| <i>KCNH5</i> | R | 327 | H | GOF     | -64.9 | -0.2  |         |  | 0.7    |  |            | faster activation                      |  | 10.1523/JNEUROSCI.2307-13.2013  |
| <i>KCNQ1</i> | V | 100 | I | Neutral | -2.03 | 0.62  | -24.55  |  | 7.43   |  |            | start - high throughput data by Carlos |  | 10.1161/CIRCGEN.118.002345      |
| <i>KCNQ1</i> | A | 102 | S | GOF     | -3.56 | 0.76  | 11.98   |  | 103.28 |  |            |                                        |  | 10.1161/CIRCGEN.118.002345      |
| <i>KCNQ1</i> | T | 104 | I | LOF     |       |       |         |  | -40    |  |            |                                        |  | 10.1161/CIRCGEN.118.002345      |
| <i>KCNQ1</i> | T | 104 | S | Neutral | -2.87 | 0.91  | -17.34  |  | -10.39 |  |            |                                        |  | 10.1161/CIRCGEN.118.002345      |
| <i>KCNQ1</i> | H | 105 | N | Neutral | 1.53  | -0.03 | -32.32  |  | -15.81 |  |            |                                        |  | 10.1161/CIRCGEN.118.002345      |
| <i>KCNQ1</i> | H | 105 | L | GOF     | -3    |       |         |  | 22     |  |            |                                        |  | 10.1161/CIRCGEN.118.002345      |
| <i>KCNQ1</i> | H | 105 | Y | Neutral | 3.68  | -0.98 | -35.75  |  | 28.95  |  |            |                                        |  | 10.1161/CIRCGEN.118.002345      |
| <i>KCNQ1</i> | V | 106 | I | Neutral | -1.43 | -0.24 | 16.23   |  | 11.82  |  |            |                                        |  | 10.1161/CIRCGEN.118.002345      |
| <i>KCNQ1</i> | Q | 107 | H | LOF     |       |       |         |  | -32    |  |            |                                        |  | 10.1161/CIRCGEN.118.002345      |
| <i>KCNQ1</i> | R | 109 | L | GOF     |       |       |         |  | 74     |  |            |                                        |  | 10.1161/CIRCGEN.118.002345      |
| <i>KCNQ1</i> | V | 110 | I | LOF     | 1.53  | 0.25  | 4.63    |  | -42.27 |  |            |                                        |  | 10.1161/CIRCGEN.118.002345      |
| <i>KCNQ1</i> | Y | 111 | C | LOF     |       |       |         |  | -57.93 |  |            |                                        |  | 10.1161/CIRCGEN.118.002345      |
| <i>KCNQ1</i> | L | 114 | P | LOF     |       |       |         |  | -57.25 |  |            |                                        |  | 10.1161/CIRCGEN.118.002345      |
| <i>KCNQ1</i> | E | 115 | G | LOF     |       |       |         |  |        |  | no current |                                        |  | 10.1161/CIRCGEN.118.002345      |
| <i>KCNQ1</i> | T | 118 | S | LOF     | 5.24  | -1.61 | 8.45    |  | -13.71 |  |            |                                        |  | 10.1161/CIRCGEN.118.002345      |
| <i>KCNQ1</i> | G | 119 | R | LOF     |       |       |         |  |        |  | no current |                                        |  | 10.1161/CIRCGEN.118.002345      |
| <i>KCNQ1</i> | C | 122 | Y | LOF     | 15.09 | -4.4  | -194.53 |  | -58.85 |  |            |                                        |  | 10.1161/CIRCGEN.118.002345      |
| <i>KCNQ1</i> | V | 124 | I | Neutral | -0.72 | 0.45  | -2.76   |  | -4.76  |  |            |                                        |  | 10.1161/CIRCGEN.118.002345      |
| <i>KCNQ1</i> | Y | 125 | D | LOF     |       |       |         |  |        |  | no current |                                        |  | 10.1161/CIRCGEN.118.002345      |
| <i>KCNQ1</i> | H | 126 | L | LOF     |       |       |         |  |        |  | no current |                                        |  | 10.1161/CIRCGEN.118.002345      |
| <i>KCNQ1</i> | F | 127 | L | LOF     | 5.5   |       |         |  | -0.2   |  |            |                                        |  | 10.1161/CIRCGEN.118.002345      |

|       |   |     |   |         |       |       |        |  |  |        |            |  |  |                                |
|-------|---|-----|---|---------|-------|-------|--------|--|--|--------|------------|--|--|--------------------------------|
| KCNQ1 | A | 128 | T | Neutral | -1.18 | 0.43  | -20.63 |  |  | -14.83 |            |  |  | 10.1161/CIRCGE<br>N.118.002345 |
| KCNQ1 | V | 129 | I | Neutral | 5.5   |       |        |  |  |        |            |  |  | 10.1161/CIRCGE<br>N.118.002345 |
| KCNQ1 | L | 131 | P | LOF     |       |       |        |  |  |        | no current |  |  | 10.1161/CIRCGE<br>N.118.002345 |
| KCNQ1 | I | 132 | L | Neutral | 2.11  | -0.14 | 245.28 |  |  | 6.56   |            |  |  | 10.1161/CIRCGE<br>N.118.002345 |
| KCNQ1 | V | 133 | I | Neutral |       |       |        |  |  |        |            |  |  | 10.1161/CIRCGE<br>N.118.002345 |
| KCNQ1 | L | 134 | P | LOF     |       |       |        |  |  |        | no current |  |  | 10.1161/CIRCGE<br>N.118.002345 |
| KCNQ1 | V | 135 | A | Neutral | -2.38 | 0.24  | 82.06  |  |  | -12.2  |            |  |  | 10.1161/CIRCGE<br>N.118.002345 |
| KCNQ1 | V | 135 | I | Neutral | -4.29 | 0.93  | -16    |  |  | 0      |            |  |  | 10.1161/CIRCGE<br>N.118.002345 |
| KCNQ1 | C | 136 | F | GOF     | -6    |       |        |  |  |        |            |  |  | 10.1161/CIRCGE<br>N.118.002345 |
| KCNQ1 | S | 140 | R | LOF     |       |       |        |  |  | -47    |            |  |  | 10.1161/CIRCGE<br>N.118.002345 |
| KCNQ1 | T | 144 | A | GOF     | -8    |       |        |  |  |        |            |  |  | 10.1161/CIRCGE<br>N.118.002345 |
| KCNQ1 | E | 146 | K | LOF     | 7     |       |        |  |  |        |            |  |  | 10.1161/CIRCGE<br>N.118.002345 |
| KCNQ1 | A | 149 | V | Neutral | 0.86  | -0.59 | -22.49 |  |  | 3.74   |            |  |  | 10.1161/CIRCGE<br>N.118.002345 |
| KCNQ1 | A | 150 | V | Neutral | 1.1   | 0.27  | -95.43 |  |  | -27.47 |            |  |  | 10.1161/CIRCGE<br>N.118.002345 |
| KCNQ1 | A | 150 | G | LOF     | 7     |       |        |  |  |        |            |  |  | 10.1161/CIRCGE<br>N.118.002345 |
| KCNQ1 | A | 150 | T | LOF     |       |       |        |  |  | -20    |            |  |  | 10.1161/CIRCGE<br>N.118.002345 |
| KCNQ1 | T | 153 | M | LOF     |       |       |        |  |  | -17    |            |  |  | 10.1161/CIRCGE<br>N.118.002345 |
| KCNQ1 | E | 160 | K | LOF     |       |       |        |  |  | -59.01 |            |  |  | 10.1161/CIRCGE<br>N.118.002345 |
| KCNQ1 | V | 162 | M | LOF     | 6     |       |        |  |  |        |            |  |  | 10.1161/CIRCGE<br>N.118.002345 |
| KCNQ1 | T | 169 | M | LOF     |       |       |        |  |  | -16    |            |  |  | 10.1161/CIRCGE<br>N.118.002345 |
| KCNQ1 | R | 174 | C | LOF     |       |       |        |  |  | -56.42 |            |  |  | 10.1161/CIRCGE<br>N.118.002345 |
| KCNQ1 | R | 174 | H | LOF     |       |       |        |  |  |        | no current |  |  | 10.1161/CIRCGE<br>N.118.002345 |
| KCNQ1 | R | 174 | L | LOF     |       |       |        |  |  |        | no current |  |  | 10.1161/CIRCGE<br>N.118.002345 |

|       |   |     |   |         |       |       |         |  |        |  |            |  |  |                                |
|-------|---|-----|---|---------|-------|-------|---------|--|--------|--|------------|--|--|--------------------------------|
| KCNQ1 | W | 176 | R | LOF     |       |       |         |  |        |  | no current |  |  | 10.1161/CIRCGE<br>N.118.002345 |
| KCNQ1 | G | 179 | A | LOF     |       |       |         |  | -49.7  |  |            |  |  | 10.1161/CIRCGE<br>N.118.002345 |
| KCNQ1 | G | 179 | S | LOF     |       |       | -34.54  |  | -51.15 |  |            |  |  | 10.1161/CIRCGE<br>N.118.002345 |
| KCNQ1 | G | 186 | C | LOF     |       |       |         |  | -47.3  |  |            |  |  | 10.1161/CIRCGE<br>N.118.002345 |
| KCNQ1 | L | 187 | P | Neutral |       |       |         |  |        |  |            |  |  | 10.1161/CIRCGE<br>N.118.002345 |
| KCNQ1 | G | 189 | A | LOF     |       |       |         |  |        |  | no current |  |  | 10.1161/CIRCGE<br>N.118.002345 |
| KCNQ1 | G | 189 | E | LOF     |       |       |         |  |        |  | no current |  |  | 10.1161/CIRCGE<br>N.118.002345 |
| KCNQ1 | R | 190 | P | LOF     |       |       |         |  |        |  | no current |  |  | 10.1161/CIRCGE<br>N.118.002345 |
| KCNQ1 | R | 192 | C | LOF     |       |       |         |  | -42    |  |            |  |  | 10.1161/CIRCGE<br>N.118.002345 |
| KCNQ1 | R | 195 | P | LOF     |       |       |         |  |        |  | no current |  |  | 10.1161/CIRCGE<br>N.118.002345 |
| KCNQ1 | R | 195 | Q | LOF     |       |       |         |  | -27    |  |            |  |  | 10.1161/CIRCGE<br>N.118.002345 |
| KCNQ1 | P | 197 | L | GOF     |       |       |         |  | 31     |  |            |  |  | 10.1161/CIRCGE<br>N.118.002345 |
| KCNQ1 | P | 197 | S | LOF     | 16    |       |         |  |        |  |            |  |  | 10.1161/CIRCGE<br>N.118.002345 |
| KCNQ1 | K | 196 | T | LOF     | 15.59 | -5.2  | -206.01 |  | -45.11 |  |            |  |  | 10.1161/CIRCGE<br>N.118.002345 |
| KCNQ1 | D | 202 | G | LOF     |       |       |         |  |        |  | no current |  |  | 10.1161/CIRCGE<br>N.118.002345 |
| KCNQ1 | I | 204 | F | LOF     | 13.1  | -2.59 | 210.13  |  | -46.62 |  |            |  |  | 10.1161/CIRCGE<br>N.118.002345 |
| KCNQ1 | V | 207 | M | Neutral | 1.59  | 0.31  | -72.48  |  | -6.92  |  |            |  |  | 10.1161/CIRCGE<br>N.118.002345 |
| KCNQ1 | S | 209 | P | GOF     | -2.6  | 1.28  |         |  | -12.17 |  |            |  |  | 10.1161/CIRCGE<br>N.118.002345 |
| KCNQ1 | M | 210 | I | LOF     |       |       |         |  | -19    |  |            |  |  | 10.1161/CIRCGE<br>N.118.002345 |
| KCNQ1 | V | 215 | G | LOF     | 8     |       |         |  |        |  |            |  |  | 10.1161/CIRCGE<br>N.118.002345 |
| KCNQ1 | K | 218 | E | LOF     |       |       |         |  | -26    |  |            |  |  | 10.1161/CIRCGE<br>N.118.002345 |
| KCNQ1 | S | 225 | W | GOF     | -13   |       |         |  |        |  |            |  |  | 10.1161/CIRCGE<br>N.118.002345 |
| KCNQ1 | I | 227 | L | LOF     | 11    |       |         |  |        |  |            |  |  | 10.1161/CIRCGE<br>N.118.002345 |

|              |   |     |   |         |        |       |         |  |  |        |  |  |                                       |  |                                         |
|--------------|---|-----|---|---------|--------|-------|---------|--|--|--------|--|--|---------------------------------------|--|-----------------------------------------|
| <i>KCNQ1</i> | R | 231 | C | LOF     |        |       |         |  |  | -29.47 |  |  |                                       |  | 10.1161/CIRCGE<br>N.118.002345          |
| <i>KCNQ1</i> | F | 279 | I | LOF     | 1.85   | 0.08  | -118.06 |  |  | -21.52 |  |  |                                       |  | 10.1161/CIRCGE<br>N.118.002345          |
| <i>KCNQ1</i> | A | 300 | T | LOF     | -15.96 | 2.9   | -29.57  |  |  | -44.6  |  |  | mild, LQT<br>phenotype only in<br>hom |  | 10.1161/CIRCGE<br>N.118.002345          |
| <i>KCNQ1</i> | Q | 234 | P | LOF     |        |       |         |  |  | -50.43 |  |  |                                       |  | 10.1161/CIRCGE<br>N.118.002345          |
| <i>KCNQ1</i> | L | 236 | P | LOF     |        |       |         |  |  | -50.35 |  |  |                                       |  | 10.1161/CIRCGE<br>N.118.002345          |
| <i>KCNQ1</i> | L | 236 | R | LOF     |        |       |         |  |  | -51.34 |  |  |                                       |  | 10.1161/CIRCGE<br>N.118.002345          |
| <i>KCNQ1</i> | V | 241 | I | LOF     | 5.24   | -2.26 | -144.16 |  |  | -29.35 |  |  |                                       |  | 10.1161/CIRCGE<br>N.118.002345          |
| <i>KCNQ1</i> | A | 344 | V | LOF     | 17.14  | -5.66 | 499.69  |  |  | -46.61 |  |  |                                       |  | 10.1161/CIRCGE<br>N.118.002345          |
| <i>KCNQ1</i> | G | 245 | R | LOF     |        |       |         |  |  | -50.73 |  |  | end throughput<br>data by Carlos      |  | 10.1161/CIRCGE<br>N.118.002345          |
| <i>KCNQ1</i> | A | 46  | T | Neutral |        |       |         |  |  | 0      |  |  | start - dataset<br>Q1 VarPred         |  | 10.1161/CIRCGE<br>NETICS.117.0017<br>54 |
| <i>KCNQ1</i> | V | 110 | I | LOF     | 30     |       |         |  |  | -0.6   |  |  |                                       |  | 10.1161/CIRCGE<br>NETICS.117.0017<br>54 |
| <i>KCNQ1</i> | Y | 111 | C | LOF     |        |       |         |  |  | -1     |  |  | not<br>expressed                      |  | 10.1161/CIRCGE<br>NETICS.117.0017<br>54 |
| <i>KCNQ1</i> | L | 114 | P | LOF     |        |       |         |  |  | -1     |  |  | not<br>expressed                      |  | 10.1161/CIRCGE<br>NETICS.117.0017<br>54 |
| <i>KCNQ1</i> | P | 117 | L | LOF     |        |       |         |  |  | -1     |  |  | reduced                               |  | 10.1161/CIRCGE<br>NETICS.117.0017<br>54 |
| <i>KCNQ1</i> | S | 140 | G | GOF     |        |       |         |  |  | 0.5    |  |  |                                       |  | 10.1161/CIRCGE<br>NETICS.117.0017<br>54 |
| <i>KCNQ1</i> | V | 141 | M | GOF     |        |       |         |  |  | 2      |  |  |                                       |  | 10.1161/CIRCGE<br>NETICS.117.0017<br>54 |
| <i>KCNQ1</i> | Q | 147 | R | LOF     |        |       |         |  |  | -0.4   |  |  |                                       |  | 10.1161/CIRCGE<br>NETICS.117.0017<br>54 |
| <i>KCNQ1</i> | G | 168 | R | LOF     |        |       |         |  |  | -0.95  |  |  |                                       |  | 10.1161/CIRCGE<br>NETICS.117.0017<br>54 |

|              |   |     |   |         |       |  |       |  |  |       |  |         |                              |  |                                         |
|--------------|---|-----|---|---------|-------|--|-------|--|--|-------|--|---------|------------------------------|--|-----------------------------------------|
| <i>KCNQ1</i> | R | 174 | C | LOF     | 17    |  |       |  |  | -0.53 |  |         |                              |  | 10.1161/CIRCGE<br>NETICS.117.0017<br>54 |
| <i>KCNQ1</i> | A | 178 | T | LOF     | 45    |  | -0.14 |  |  | -0.59 |  | reduced |                              |  | 10.1161/CIRCGE<br>NETICS.117.0017<br>54 |
| <i>KCNQ1</i> | G | 179 | S | GOF     |       |  |       |  |  | -0.46 |  |         |                              |  | 10.1161/CIRCGE<br>NETICS.117.0017<br>54 |
| <i>KCNQ1</i> | R | 190 | Q | LOF     |       |  |       |  |  | -1    |  |         |                              |  | 10.1161/CIRCGE<br>NETICS.117.0017<br>54 |
| <i>KCNQ1</i> | L | 191 | P | LOF     |       |  |       |  |  | -0.78 |  |         |                              |  | 10.1161/CIRCGE<br>NETICS.117.0017<br>54 |
| <i>KCNQ1</i> | F | 193 | L | LOF     |       |  |       |  |  | -0.2  |  |         | slow activation              |  | 10.1161/CIRCGE<br>NETICS.117.0017<br>54 |
| <i>KCNQ1</i> | D | 202 | E | LOF     |       |  | -0.67 |  |  | -0.89 |  |         |                              |  | 10.1161/CIRCGE<br>NETICS.117.0017<br>54 |
| <i>KCNQ1</i> | D | 202 | H | LOF     | 16.6  |  | -0.74 |  |  | -0.59 |  |         |                              |  | 10.1161/CIRCGE<br>NETICS.117.0017<br>54 |
| <i>KCNQ1</i> | D | 202 | N | LOF     | 23.8  |  | -0.74 |  |  | -0.59 |  |         |                              |  | 10.1161/CIRCGE<br>NETICS.117.0017<br>54 |
| <i>KCNQ1</i> | D | 202 | A | Neutral | 12    |  |       |  |  |       |  |         |                              |  | 10.1085/jgp.2009<br>10351               |
| <i>KCNQ1</i> | D | 202 | M | LOF     | 24    |  |       |  |  |       |  |         |                              |  | 10.1085/jgp.2009<br>10351               |
| <i>KCNQ1</i> | D | 202 | K | LOF     | 22    |  |       |  |  |       |  |         |                              |  | 10.1085/jgp.2009<br>10351               |
| <i>KCNQ1</i> | I | 204 | F | LOF     | 53.3  |  | -0.57 |  |  | -0.77 |  |         | extremely slow<br>activation |  | 10.1161/CIRCGE<br>NETICS.117.0017<br>54 |
| <i>KCNQ1</i> | I | 204 | M | LOF     | 36.1  |  | -0.35 |  |  | -0.66 |  |         |                              |  | 10.1161/CIRCGE<br>NETICS.117.0017<br>54 |
| <i>KCNQ1</i> | I | 204 | N | LOF     | 32.9  |  | -0.3  |  |  |       |  |         |                              |  | 10.1161/CIRCGE<br>NETICS.117.0017<br>54 |
| <i>KCNQ1</i> | I | 204 | A | LOF     | 18.3  |  |       |  |  |       |  |         |                              |  | 10.1085/jgp.2009<br>10351               |
| <i>KCNQ1</i> | V | 205 | L | Neutral | -17.7 |  |       |  |  |       |  |         |                              |  | 10.1085/jgp.2009<br>10351               |
| <i>KCNQ1</i> | V | 205 | A | LOF     | 50.3  |  |       |  |  |       |  |         |                              |  | 10.1085/jgp.2009<br>10351               |

|       |   |     |   |         |       |  |       |  |  |  |   |  |  |  |  |         |                                         |
|-------|---|-----|---|---------|-------|--|-------|--|--|--|---|--|--|--|--|---------|-----------------------------------------|
| KCNQ1 | V | 205 | M | LOF     | 20    |  | -0.58 |  |  |  |   |  |  |  |  |         | 10.1161/CIRCGE<br>NETICS.117.0017<br>54 |
| KCNQ1 | V | 207 | M | Neutral | 7.1   |  | 0.2   |  |  |  |   |  |  |  |  |         | 10.1161/CIRCGE<br>NETICS.117.0017<br>54 |
| KCNQ1 | S | 209 | F | GOF     | -48.7 |  |       |  |  |  |   |  |  |  |  |         | 10.1161/CIRCGE<br>NETICS.117.0017<br>54 |
| KCNQ1 | S | 209 | M | GOF     | -40.7 |  |       |  |  |  |   |  |  |  |  |         | 10.1085/jgp.2009<br>10351               |
| KCNQ1 | S | 209 | A | GOF     | -33.7 |  |       |  |  |  |   |  |  |  |  |         | 10.1085/jgp.2009<br>10351               |
| KCNQ1 | S | 209 | L | GOF     | -47.7 |  |       |  |  |  |   |  |  |  |  |         | 10.1085/jgp.2009<br>10351               |
| KCNQ1 | S | 209 | P | GOF     | -42.4 |  | 4.7   |  |  |  | 1 |  |  |  |  |         | 10.1161/CIRCGE<br>NETICS.117.0017<br>54 |
| KCNQ1 | V | 215 | M | LOF     | 20.2  |  |       |  |  |  |   |  |  |  |  |         | 10.1161/CIRCGE<br>NETICS.117.0017<br>54 |
| KCNQ1 | V | 215 | A | Neutral | -9.7  |  |       |  |  |  |   |  |  |  |  |         | 10.1085/jgp.2009<br>10351               |
| KCNQ1 | S | 225 | L | LOF     | 11    |  |       |  |  |  |   |  |  |  |  |         | 10.1161/CIRCGE<br>NETICS.117.0017<br>54 |
| KCNQ1 | R | 231 | C | LOF     |       |  |       |  |  |  |   |  |  |  |  |         | 10.1161/CIRCGE<br>NETICS.117.0017<br>54 |
| KCNQ1 | R | 231 | H | LOF     | 40    |  |       |  |  |  |   |  |  |  |  |         | 10.1161/CIRCGE<br>NETICS.117.0017<br>54 |
| KCNQ1 | I | 235 | N | LOF     |       |  |       |  |  |  |   |  |  |  |  |         | 10.1161/CIRCGE<br>NETICS.117.0017<br>54 |
| KCNQ1 | L | 236 | R | LOF     | 54    |  |       |  |  |  |   |  |  |  |  | reduced | 10.1161/CIRCGE<br>NETICS.117.0017<br>54 |
| KCNQ1 | R | 243 | C | LOF     | 67    |  |       |  |  |  |   |  |  |  |  |         | 10.1161/CIRCGE<br>NETICS.117.0017<br>54 |
| KCNQ1 | R | 243 | H | LOF     |       |  |       |  |  |  |   |  |  |  |  |         | 10.1161/CIRCGE<br>NETICS.117.0017<br>54 |
| KCNQ1 | W | 248 | R | LOF     |       |  |       |  |  |  |   |  |  |  |  |         | 10.1161/CIRCGE<br>NETICS.117.0017<br>54 |

|       |   |     |   |     |      |  |      |  |  |       |  |         |                 |                                         |
|-------|---|-----|---|-----|------|--|------|--|--|-------|--|---------|-----------------|-----------------------------------------|
| KCNQ1 | L | 251 | P | LOF |      |  |      |  |  | -1    |  |         |                 | 10.1161/CIRCGE<br>NETICS.117.0017<br>54 |
| KCNQ1 | V | 254 | M | LOF | 41.5 |  |      |  |  | -0.93 |  |         |                 | 10.1161/CIRCGE<br>NETICS.117.0017<br>54 |
| KCNQ1 | H | 258 | R | GOF | -44  |  |      |  |  | -0.95 |  | reduced | slow activation | 10.1161/CIRCGE<br>NETICS.117.0017<br>54 |
| KCNQ1 | R | 259 | C | LOF | 10   |  |      |  |  | -0.7  |  |         |                 | 10.1161/CIRCGE<br>NETICS.117.0017<br>54 |
| KCNQ1 | R | 259 | H | GOF | 1    |  |      |  |  | 1     |  |         |                 | 10.1161/CIRCGE<br>NETICS.117.0017<br>54 |
| KCNQ1 | E | 261 | D | LOF |      |  |      |  |  | -0.91 |  |         |                 | 10.1161/CIRCGE<br>NETICS.117.0017<br>54 |
| KCNQ1 | E | 261 | K | LOF |      |  |      |  |  | -0.95 |  |         |                 | 10.1161/CIRCGE<br>NETICS.117.0017<br>54 |
| KCNQ1 | T | 265 | I | LOF | 8    |  |      |  |  | 0     |  |         | slow activation | 10.1161/CIRCGE<br>NETICS.117.0017<br>54 |
| KCNQ1 | G | 269 | D | LOF |      |  |      |  |  | -1    |  |         |                 | 10.1161/CIRCGE<br>NETICS.117.0017<br>54 |
| KCNQ1 | G | 269 | S | LOF | 70.7 |  | -0.6 |  |  | -0.85 |  | reduced |                 | 10.1161/CIRCGE<br>NETICS.117.0017<br>54 |
| KCNQ1 | G | 272 | V | LOF | 10   |  |      |  |  | -0.66 |  |         |                 | 10.1161/CIRCGE<br>NETICS.117.0017<br>54 |
| KCNQ1 | F | 275 | S | LOF | 27   |  | 1    |  |  | -0.66 |  | reduced |                 | 10.1161/CIRCGE<br>NETICS.117.0017<br>54 |
| KCNQ1 | S | 277 | L | LOF |      |  |      |  |  | -1    |  |         |                 | 10.1161/CIRCGE<br>NETICS.117.0017<br>54 |
| KCNQ1 | F | 279 | I | GOF | -25  |  | 0    |  |  | 0.5   |  |         |                 | 10.1161/CIRCGE<br>NETICS.117.0017<br>54 |
| KCNQ1 | Y | 281 | C | LOF |      |  |      |  |  | -1    |  |         |                 | 10.1161/CIRCGE<br>NETICS.117.0017<br>54 |
| KCNQ1 | A | 283 | T | LOF | 9    |  |      |  |  | -0.8  |  |         |                 | 10.1161/CIRCGE<br>NETICS.117.0017<br>54 |



|       |   |     |   |     |     |  |  |  |  |  |  |  |  |  |  |  |         |                                         |
|-------|---|-----|---|-----|-----|--|--|--|--|--|--|--|--|--|--|--|---------|-----------------------------------------|
| KCNQ1 | F | 296 | S | GOF | -10 |  |  |  |  |  |  |  |  |  |  |  |         | 10.1161/CIRCGE<br>NETICS.117.0017<br>54 |
| KCNQ1 | A | 300 | T | GOF | -19 |  |  |  |  |  |  |  |  |  |  |  |         | 10.1161/CIRCGE<br>NETICS.117.0017<br>54 |
| KCNQ1 | A | 302 | V | LOF |     |  |  |  |  |  |  |  |  |  |  |  |         | 10.1161/CIRCGE<br>NETICS.117.0017<br>54 |
| KCNQ1 | W | 305 | S | LOF |     |  |  |  |  |  |  |  |  |  |  |  |         | 10.1161/CIRCGE<br>NETICS.117.0017<br>54 |
| KCNQ1 | V | 307 | L | GOF | -18 |  |  |  |  |  |  |  |  |  |  |  |         | 10.1161/CIRCGE<br>NETICS.117.0017<br>54 |
| KCNQ1 | V | 310 | I | LOF | 60  |  |  |  |  |  |  |  |  |  |  |  |         | 10.1161/CIRCGE<br>NETICS.117.0017<br>54 |
| KCNQ1 | I | 313 | K | LOF |     |  |  |  |  |  |  |  |  |  |  |  |         | 10.1161/CIRCGE<br>NETICS.117.0017<br>54 |
| KCNQ1 | G | 314 | S | LOF |     |  |  |  |  |  |  |  |  |  |  |  |         | 10.1161/CIRCGE<br>NETICS.117.0017<br>54 |
| KCNQ1 | Y | 315 | C | LOF |     |  |  |  |  |  |  |  |  |  |  |  |         | 10.1161/CIRCGE<br>NETICS.117.0017<br>54 |
| KCNQ1 | Y | 315 | S | LOF |     |  |  |  |  |  |  |  |  |  |  |  |         | 10.1161/CIRCGE<br>NETICS.117.0017<br>54 |
| KCNQ1 | G | 316 | E | LOF |     |  |  |  |  |  |  |  |  |  |  |  |         | 10.1161/CIRCGE<br>NETICS.117.0017<br>54 |
| KCNQ1 | P | 320 | A | LOF |     |  |  |  |  |  |  |  |  |  |  |  |         | 10.1161/CIRCGE<br>NETICS.117.0017<br>54 |
| KCNQ1 | P | 320 | H | LOF |     |  |  |  |  |  |  |  |  |  |  |  |         | 10.1161/CIRCGE<br>NETICS.117.0017<br>54 |
| KCNQ1 | T | 322 | A | LOF |     |  |  |  |  |  |  |  |  |  |  |  | reduced | 10.1161/CIRCGE<br>NETICS.117.0017<br>54 |
| KCNQ1 | T | 322 | M | LOF |     |  |  |  |  |  |  |  |  |  |  |  | reduced | 10.1161/CIRCGE<br>NETICS.117.0017<br>54 |
| KCNQ1 | G | 325 | R | LOF |     |  |  |  |  |  |  |  |  |  |  |  |         | 10.1161/CIRCGE<br>NETICS.117.0017<br>54 |

|              |   |     |   |         |      |  |       |  |  |       |  |                 |  |                                         |
|--------------|---|-----|---|---------|------|--|-------|--|--|-------|--|-----------------|--|-----------------------------------------|
| <i>KCNQ1</i> | S | 338 | F | LOF     | 12   |  |       |  |  | -0.95 |  |                 |  | 10.1161/CIRCGE<br>NETICS.117.0017<br>54 |
| <i>KCNQ1</i> | F | 339 | S | LOF     | 1    |  |       |  |  | -0.96 |  |                 |  | 10.1161/CIRCGE<br>NETICS.117.0017<br>54 |
| <i>KCNQ1</i> | A | 341 | V | LOF     | 60   |  | -0.71 |  |  | -0.94 |  | slow activation |  | 10.1161/CIRCGE<br>NETICS.117.0017<br>54 |
| <i>KCNQ1</i> | L | 342 | F | LOF     |      |  |       |  |  | -1    |  |                 |  | 10.1161/CIRCGE<br>NETICS.117.0017<br>54 |
| <i>KCNQ1</i> | P | 343 | S | LOF     |      |  |       |  |  | -1    |  |                 |  | 10.1161/CIRCGE<br>NETICS.117.0017<br>54 |
| <i>KCNQ1</i> | A | 344 | V | LOF     | 40   |  |       |  |  | 0     |  |                 |  | 10.1161/CIRCGE<br>NETICS.117.0017<br>54 |
| <i>KCNQ1</i> | Q | 357 | R | LOF     | 20   |  | 0     |  |  | -0.73 |  | reduced         |  | 10.1161/CIRCGE<br>NETICS.117.0017<br>54 |
| <i>KCNQ1</i> | R | 360 | G | LOF     |      |  |       |  |  | -0.8  |  |                 |  | 10.1161/CIRCGE<br>NETICS.117.0017<br>54 |
| <i>KCNQ1</i> | R | 366 | P | LOF     | 24.1 |  |       |  |  | -1    |  |                 |  | 10.1161/CIRCGE<br>NETICS.117.0017<br>54 |
| <i>KCNQ1</i> | R | 366 | Q | LOF     | 29   |  |       |  |  | -0.78 |  |                 |  | 10.1161/CIRCGE<br>NETICS.117.0017<br>54 |
| <i>KCNQ1</i> | R | 366 | W | LOF     | 39.2 |  |       |  |  | -0.7  |  | reduced         |  | 10.1161/CIRCGE<br>NETICS.117.0017<br>54 |
| <i>KCNQ1</i> | A | 371 | T | LOF     | 21.9 |  |       |  |  | -1    |  |                 |  | 10.1161/CIRCGE<br>NETICS.117.0017<br>54 |
| <i>KCNQ1</i> | S | 373 | P | LOF     | 37.9 |  |       |  |  | -0.95 |  | reduced         |  | 10.1161/CIRCGE<br>NETICS.117.0017<br>54 |
| <i>KCNQ1</i> | W | 379 | R | LOF     |      |  |       |  |  | -1    |  | reduced         |  | 10.1161/CIRCGE<br>NETICS.117.0017<br>54 |
| <i>KCNQ1</i> | R | 380 | S | LOF     |      |  |       |  |  | -0.67 |  |                 |  | 10.1161/CIRCGE<br>NETICS.117.0017<br>54 |
| <i>KCNQ1</i> | T | 391 | I | Neutral |      |  |       |  |  | -0.15 |  |                 |  | 10.1161/CIRCGE<br>NETICS.117.0017<br>54 |

|              |   |     |   |         |      |  |       |  |  |       |  |                  |  |                                         |
|--------------|---|-----|---|---------|------|--|-------|--|--|-------|--|------------------|--|-----------------------------------------|
| <i>KCNQ1</i> | W | 392 | R | LOF     | 28.3 |  |       |  |  | -1    |  |                  |  | 10.1161/CIRCGE<br>NETICS.117.0017<br>54 |
| <i>KCNQ1</i> | K | 393 | M | LOF     |      |  |       |  |  | -0.67 |  |                  |  | 10.1161/CIRCGE<br>NETICS.117.0017<br>54 |
| <i>KCNQ1</i> | K | 393 | N | Neutral |      |  |       |  |  | 0     |  |                  |  | 10.1161/CIRCGE<br>NETICS.117.0017<br>54 |
| <i>KCNQ1</i> | R | 397 | Q | Neutral |      |  |       |  |  | -0.1  |  | reduced          |  | 10.1161/CIRCGE<br>NETICS.117.0017<br>54 |
| <i>KCNQ1</i> | R | 397 | W | LOF     |      |  | 0     |  |  | -0.6  |  |                  |  | 10.1161/CIRCGE<br>NETICS.117.0017<br>54 |
| <i>KCNQ1</i> | V | 417 | M | Neutral |      |  |       |  |  | 0     |  |                  |  | 10.1161/CIRCGE<br>NETICS.117.0017<br>54 |
| <i>KCNQ1</i> | P | 448 | R | GOF     |      |  |       |  |  | 1     |  |                  |  | 10.1161/CIRCGE<br>NETICS.117.0017<br>54 |
| <i>KCNQ1</i> | H | 455 | Y | LOF     |      |  |       |  |  | -0.57 |  |                  |  | 10.1161/CIRCGE<br>NETICS.117.0017<br>54 |
| <i>KCNQ1</i> | M | 520 | R | LOF     |      |  |       |  |  | -1    |  | not<br>expressed |  | 10.1161/CIRCGE<br>NETICS.117.0017<br>54 |
| <i>KCNQ1</i> | Y | 522 | S | LOF     | 7    |  |       |  |  | -0.9  |  | reduced          |  | 10.1161/CIRCGE<br>NETICS.117.0017<br>54 |
| <i>KCNQ1</i> | A | 525 | T | LOF     | 22   |  | 0.08  |  |  | -0.64 |  | reduced          |  | 10.1161/CIRCGE<br>NETICS.117.0017<br>54 |
| <i>KCNQ1</i> | R | 533 | W | Neutral | 13.9 |  |       |  |  | -0.28 |  |                  |  | 10.1161/CIRCGE<br>NETICS.117.0017<br>54 |
| <i>KCNQ1</i> | R | 539 | W | LOF     | 33.9 |  | -0.59 |  |  | -0.83 |  |                  |  | 10.1161/CIRCGE<br>NETICS.117.0017<br>54 |
| <i>KCNQ1</i> | S | 546 | L | LOF     | 50.7 |  | -0.19 |  |  | -0.75 |  |                  |  | 10.1161/CIRCGE<br>NETICS.117.0017<br>54 |
| <i>KCNQ1</i> | R | 555 | C | LOF     | 60   |  |       |  |  | -0.75 |  |                  |  | 10.1161/CIRCGE<br>NETICS.117.0017<br>54 |
| <i>KCNQ1</i> | R | 555 | H | LOF     | 50   |  | -0.28 |  |  | -0.88 |  |                  |  | 10.1161/CIRCGE<br>NETICS.117.0017<br>54 |

|              |   |     |   |         |      |     |       |  |  |       |  |         |                                              |  |                                         |
|--------------|---|-----|---|---------|------|-----|-------|--|--|-------|--|---------|----------------------------------------------|--|-----------------------------------------|
| <i>KCNQ1</i> | K | 557 | E | LOF     |      |     |       |  |  | -1    |  |         |                                              |  | 10.1161/CIRCGE<br>NETICS.117.0017<br>54 |
| <i>KCNQ1</i> | R | 562 | M | LOF     | 43.3 |     | 0.07  |  |  | -0.57 |  |         |                                              |  | 10.1161/CIRCGE<br>NETICS.117.0017<br>54 |
| <i>KCNQ1</i> | R | 583 | H | Neutral |      |     |       |  |  | 0     |  |         |                                              |  | 10.1161/CIRCGE<br>NETICS.117.0017<br>54 |
| <i>KCNQ1</i> | G | 589 | D | LOF     | 33   |     |       |  |  | -0.85 |  | reduced |                                              |  | 10.1161/CIRCGE<br>NETICS.117.0017<br>54 |
| <i>KCNQ1</i> | A | 590 | T | LOF     | 10   |     |       |  |  | -0.55 |  |         |                                              |  | 10.1161/CIRCGE<br>NETICS.117.0017<br>54 |
| <i>KCNQ1</i> | R | 594 | Q | LOF     | 60   |     |       |  |  | -0.95 |  |         |                                              |  | 10.1161/CIRCGE<br>NETICS.117.0017<br>54 |
| <i>KCNQ1</i> | D | 611 | Y | Neutral |      |     |       |  |  | 0     |  |         |                                              |  | 10.1161/CIRCGE<br>NETICS.117.0017<br>54 |
| <i>KCNQ1</i> | L | 619 | M | LOF     |      |     |       |  |  | -0.99 |  |         |                                              |  | 10.1161/CIRCGE<br>NETICS.117.0017<br>54 |
| <i>KCNQ1</i> | G | 643 | S | LOF     | 1.1  |     | -0.28 |  |  | -0.65 |  |         | end - dataset<br>Q1VarPred                   |  | 10.1161/CIRCGE<br>NETICS.117.0017<br>54 |
| <i>KCNQ2</i> | R | 333 | Q | LOF     | -1.4 | 0.1 |       |  |  | -0.3  |  |         |                                              |  | 10.1093/brain/aw<br>g286                |
| <i>KCNQ2</i> | M | 208 | V | LOF     | -0.1 | 0.1 |       |  |  | -0.15 |  |         |                                              |  | 10.1093/brain/aw<br>g286                |
| <i>KCNQ2</i> | T | 359 | K | LOF     | 6.2  | 1.4 |       |  |  | -672  |  |         | slower activation                            |  | 10.1016/j.neulet.2<br>009.06.064        |
| <i>KCNQ2</i> | N | 258 | S | LOF     | 1    | 0   |       |  |  | -218  |  | reduced |                                              |  | 10.1002/humu.21<br>554                  |
| <i>KCNQ2</i> | I | 205 | V | LOF     | 24   |     |       |  |  | -0.1  |  |         | slowing of<br>activation and<br>deactivation |  | 10.1002/ana.2408<br>0                   |
| <i>KCNQ2</i> | R | 213 | Q | LOF     | 61   |     |       |  |  | -0.4  |  |         | slowing of<br>activation and<br>deactivation |  | 10.1002/ana.2408<br>0                   |
| <i>KCNQ2</i> | A | 265 | P | LOF     |      |     |       |  |  | -0.65 |  |         |                                              |  | 10.1002/ana.2408<br>0                   |
| <i>KCNQ2</i> | T | 274 | M | LOF     |      |     |       |  |  | -0.8  |  |         |                                              |  | 10.1002/ana.2408<br>0                   |
| <i>KCNQ2</i> | G | 290 | D | LOF     | 10   |     |       |  |  | -0.68 |  |         |                                              |  | 10.1002/ana.2408<br>0                   |

|       |   |     |   |     |       |      |  |  |       |  |               |                                        |  |                                |
|-------|---|-----|---|-----|-------|------|--|--|-------|--|---------------|----------------------------------------|--|--------------------------------|
| KCNQ2 | M | 518 | V | LOF |       |      |  |  | 0     |  |               |                                        |  | 10.1002/ana.24080              |
| KCNQ2 | R | 532 | W | LOF | 17.1  |      |  |  | 0     |  | reduced       | slower activation, faster deactivation |  | 10.1002/ana.24080              |
| KCNQ2 | R | 144 | Q | GOF | -20.2 | 5.6  |  |  | 6     |  |               |                                        |  | 10.1523/JNEUROSCI.4423-14.2015 |
| KCNQ2 | R | 201 | C | GOF |       |      |  |  | 29    |  |               | loss of time dependence of activation  |  | 10.1523/JNEUROSCI.4423-14.2015 |
| KCNQ2 | R | 201 | H | GOF | -29.4 | 13.1 |  |  | 20    |  |               |                                        |  | 10.1523/JNEUROSCI.4423-14.2015 |
| KCNQ2 | D | 172 | R | LOF | 14.7  |      |  |  |       |  |               |                                        |  | 10.1523/JNEUROSCI.4423-14.2015 |
| KCNQ2 | D | 172 | C | LOF | 22.7  |      |  |  |       |  |               |                                        |  | 10.1523/JNEUROSCI.4423-14.2015 |
| KCNQ2 | E | 130 | R | LOF | 86.7  |      |  |  |       |  |               |                                        |  | 10.1523/JNEUROSCI.4423-14.2015 |
| KCNQ2 | E | 130 | C | LOF | 27.7  |      |  |  |       |  |               |                                        |  | 10.1523/JNEUROSCI.4423-14.2015 |
| KCNQ2 | E | 140 | R | LOF |       |      |  |  |       |  | not expressed |                                        |  | 10.1523/JNEUROSCI.4423-14.2015 |
| KCNQ2 | E | 140 | C | LOF |       |      |  |  |       |  | not expressed |                                        |  | 10.1523/JNEUROSCI.4423-14.2015 |
| KCNQ2 | L | 351 | F | LOF | -0.8  | 0.7  |  |  | -9    |  |               | currents estimated from figure         |  | 10.1016/j.bbdis.2015.06.012    |
| KCNQ2 | L | 351 | V | GOF | -2.8  | -1.5 |  |  | 0     |  |               | currents estimated from figure         |  | 10.1016/j.bbdis.2015.06.012    |
| KCNQ2 | Y | 362 | C | GOF | -3    | -0.3 |  |  | 12    |  |               | currents estimated from figure         |  | 10.1016/j.bbdis.2015.06.012    |
| KCNQ2 | R | 553 | Q | LOF | 0.7   | -1.1 |  |  | -13   |  |               | currents estimated from figure         |  | 10.1016/j.bbdis.2015.06.012    |
| KCNQ2 | W | 344 | R | LOF |       |      |  |  |       |  | no current    |                                        |  | 10.1016/j.bbdis.2015.06.012    |
| KCNQ2 | E | 130 | R | LOF | 84.5  | 20   |  |  | -4.2  |  |               |                                        |  | 10.3390/ijms20143382           |
| KCNQ2 | E | 140 | Q | LOF | 71.1  | 10.1 |  |  | -13.6 |  |               | faster deactivation                    |  | 10.3390/ijms20143382           |
| KCNQ2 | E | 140 | R | LOF |       |      |  |  | -32.4 |  |               |                                        |  | 10.3390/ijms20143382           |
| KCNQ2 | D | 172 | R | LOF | 13.1  | 5.8  |  |  | -20   |  |               |                                        |  | 10.3390/ijms20143382           |
| KCNQ2 | R | 207 | E | LOF | 68.8  | 7    |  |  | -1.4  |  |               |                                        |  | 10.3390/ijms20143382           |
| KCNQ2 | R | 210 | E | LOF | 74.1  | 11.4 |  |  | 40.5  |  |               |                                        |  | 10.3390/ijms20143382           |
| KCNQ2 | R | 210 | D | LOF | 225   | 27.3 |  |  | -6.3  |  |               |                                        |  | 10.3390/ijms20143382           |



|       |   |     |   |         |      |      |   |       |  |        |  |         |                                                  |                                    |
|-------|---|-----|---|---------|------|------|---|-------|--|--------|--|---------|--------------------------------------------------|------------------------------------|
| KCNQ2 | R | 213 | Q | LOF     | 64.3 | 2.4  |   |       |  | -9     |  |         |                                                  | 10.1529/biophysj.107.128371        |
| KCNQ2 | R | 214 | Q | LOF     | 34   | 2.6  |   |       |  | -17    |  |         |                                                  | 10.1529/biophysj.107.128371        |
| KCNQ2 | R | 207 | W | LOF     | 29.5 | 0    |   |       |  |        |  |         | altered tau activation                           | 10.1529/biophysj.107.128371        |
| KCNQ2 | R | 214 | W | LOF     | 12.5 | 3.3  |   |       |  |        |  |         | activation kinetics estimated from figure        | 10.1529/biophysj.107.128371        |
| KCNQ2 | G | 271 | V | LOF     | 3.1  | 2.53 |   |       |  | -80.98 |  |         | slower activation                                | 10.1016/j.brainres.2015.04.060     |
| KCNQ2 | R | 325 | G | LOF     |      |      |   |       |  | -27.7  |  |         | additional data on PIP modulation                | 10.1038/srep38167                  |
| KCNQ2 | A | 294 | V | LOF     | 0    | 0    | 0 |       |  | -0.83  |  |         | subcellular mislocalization                      | 10.1016/j.nbd.2015.04.017          |
| KCNQ2 | A | 294 | G | Neutral |      |      |   |       |  | -0.3   |  |         |                                                  | 10.1016/j.nbd.2015.04.017          |
| KCNQ2 | E | 119 | G | LOF     | 6.8  | 0.3  |   |       |  | -0.2   |  |         | mild slowing of activation                       | 10.1113/jphysiol.2007.143826       |
| KCNQ2 | S | 122 | L | LOF     | 6    | 2.6  |   |       |  | -0.1   |  |         | current estimated from figure, slower activation | 10.1016/j.nbd.2006.06.011          |
| KCNQ2 | T | 114 | A | LOF     | 24.8 |      |   | -13.7 |  | -0.45  |  |         | slower activation                                | 10.1007/s00424-012-1184-x          |
| KCNQ2 | K | 526 | N | LOF     | 11.4 | 2.6  |   |       |  | -2.7   |  |         |                                                  | 10.1212/01.WNL.0000132979.08394.6D |
| KCNQ2 | L | 203 | P | LOF     | 24.4 | -0.7 |   |       |  | 251.3  |  |         | slow activation                                  | 10.1038/s41598-020-61697-6         |
| KCNQ2 | L | 268 | F | LOF     | -4.9 | -0.4 |   |       |  | -689.7 |  | reduced |                                                  | 10.1038/s41598-020-61697-6         |
| KCNQ2 | K | 552 | T | LOF     | 0.8  | -1.5 |   |       |  | -786.6 |  | reduced |                                                  | 10.1038/s41598-020-61697-6         |
| KCNQ2 | R | 553 | L | LOF     | -4.5 | -0.8 |   |       |  | -65.3  |  | reduced | interesting PIP2 binding effects                 | 10.1038/s41598-020-61697-6         |
| KCNQ2 | Y | 284 | C | LOF     |      |      |   |       |  | -0.25  |  |         |                                                  | 10.1038/25367                      |
| KCNQ2 | G | 310 | V | LOF     |      |      |   |       |  | -0.2   |  |         |                                                  | 10.1038/25367                      |
| KCNQ2 | A | 306 | T | LOF     |      |      |   |       |  | -0.3   |  |         |                                                  | 10.1038/25367                      |
| KCNQ2 | G | 279 | S | LOF     |      |      |   |       |  | -13    |  |         | dominant negative                                | 10.1038/25367                      |
| KCNQ3 | N | 468 | S | Neutral | 0.6  | 1.9  |   |       |  | -0.1   |  |         | currents estimated from figure                   | 10.1093/brain/awg286               |
| KCNQ3 | D | 305 | G | LOF     | 0.8  | 1.7  | 0 |       |  | -0.4   |  |         |                                                  | 10.1093/brain/awg286               |
| KCNQ3 | R | 227 | Q | GOF     | -5.9 | 1.1  |   |       |  | -32.2  |  |         | homozygotes have extreme GOF                     | 10.1002/ana.25522                  |

|       |   |     |   |     |       |      |  |  |  |  |  |  |  |  |  |  |         |                                                        |
|-------|---|-----|---|-----|-------|------|--|--|--|--|--|--|--|--|--|--|---------|--------------------------------------------------------|
| KCNQ3 | R | 230 | C | GOF | -6.3  | 1.7  |  |  |  |  |  |  |  |  |  |  |         | 10.1002/ana.25522                                      |
| KCNQ3 | R | 230 | S | GOF | -5.4  | 1.4  |  |  |  |  |  |  |  |  |  |  |         | 10.1002/ana.25522                                      |
| KCNQ3 | R | 230 | H | GOF | -5.9  | 0.6  |  |  |  |  |  |  |  |  |  |  |         | 10.1002/ana.25522                                      |
| KCNQ3 | M | 240 | R | LOF | 45.8  | 11.4 |  |  |  |  |  |  |  |  |  |  |         | 10.3389/fphys.2020.01040                               |
| KCNQ3 | W | 309 | R | LOF | 7.5   | 1.9  |  |  |  |  |  |  |  |  |  |  |         | 10.1007/s00232-008-9097-5                              |
| KCNQ3 | W | 309 | F | LOF |       |      |  |  |  |  |  |  |  |  |  |  |         | currents estimated, slower activation                  |
| KCNQ3 | W | 309 | Y | LOF |       |      |  |  |  |  |  |  |  |  |  |  |         | data only for homozygote                               |
| KCNQ3 | W | 309 | Y | LOF |       |      |  |  |  |  |  |  |  |  |  |  |         | data only for homozygote                               |
| KCNQ3 | G | 310 | V | LOF |       |      |  |  |  |  |  |  |  |  |  |  |         | homozygote w/o current                                 |
| KCNQ3 | T | 313 | I | LOF | 4.2   | -0.8 |  |  |  |  |  |  |  |  |  |  |         | 10.1038/25367                                          |
| KCNQ3 | T | 313 | M | LOF |       |      |  |  |  |  |  |  |  |  |  |  |         | homomeric channels non-functional                      |
| KCNQ3 | T | 313 | M | LOF |       |      |  |  |  |  |  |  |  |  |  |  |         | strong reduction of peak current, no exact value given |
| KCNQ3 | V | 279 | F | LOF | 0     | 0    |  |  |  |  |  |  |  |  |  |  |         | 10.1002/epi4.12438                                     |
| KCNQ3 | R | 230 | K | GOF | -48.5 | 0.7  |  |  |  |  |  |  |  |  |  |  |         | 10.1159/000447461                                      |
| KCNQ3 | R | 230 | H | GOF | -78.1 | 4.9  |  |  |  |  |  |  |  |  |  |  |         | 10.1085/jgp.201812221                                  |
| KCNQ3 | R | 230 | H | GOF | -78.1 | 4.9  |  |  |  |  |  |  |  |  |  |  |         | 10.1085/jgp.201812221                                  |
| KCNQ3 | V | 359 | L | LOF | 7     | -0.4 |  |  |  |  |  |  |  |  |  |  |         | 10.1007/s12035-018-0883-5                              |
| KCNQ3 | D | 542 | N | LOF | 2.6   | -1.9 |  |  |  |  |  |  |  |  |  |  |         | 10.1007/s12035-018-0883-5                              |
| KCNQ4 | G | 285 | S | LOF |       |      |  |  |  |  |  |  |  |  |  |  |         | 10.1016/s0092-8674(00)80556-5                          |
| KCNQ4 | G | 296 | S | LOF | 0     | 0    |  |  |  |  |  |  |  |  |  |  | reduced | 10.1007/s00439-007-0447-7                              |
| KCNQ4 | L | 274 | H | LOF |       |      |  |  |  |  |  |  |  |  |  |  | reduced | 10.1074/jbc.M110.179010                                |
| KCNQ4 | W | 276 | S | LOF | 3     | 0    |  |  |  |  |  |  |  |  |  |  | reduced | 10.1074/jbc.M110.179010                                |
| KCNQ4 | L | 281 | S | LOF |       |      |  |  |  |  |  |  |  |  |  |  | reduced | 10.1074/jbc.M110.179010                                |
| KCNQ4 | G | 285 | C | LOF |       |      |  |  |  |  |  |  |  |  |  |  | reduced | 10.1074/jbc.M110.179010                                |
| KCNQ4 | G | 285 | C | LOF |       |      |  |  |  |  |  |  |  |  |  |  | reduced | faster activation, faster deactivation                 |



|       |   |     |   |         |   |   |   |  |  |        |  |         |                                                  |                                  |
|-------|---|-----|---|---------|---|---|---|--|--|--------|--|---------|--------------------------------------------------|----------------------------------|
| KCNQ4 | G | 296 | S | LOF     |   |   |   |  |  |        |  | reduced | faster activation, faster deactivation           | 10.1074/jbc.M110.179010          |
| KCNQ4 | G | 321 | S | LOF     | 0 | 0 | 0 |  |  | -0.7   |  |         | faster activation, current estimated from figure | 10.1074/jbc.M110.179010          |
| KCNQ4 | F | 182 | L | Neutral | 0 | 0 |   |  |  | 0      |  |         | faster activation, faster deactivation           | 10.1074/jbc.M110.179010          |
| KCNQ4 | W | 276 | S | LOF     |   |   |   |  |  | -0.9   |  |         |                                                  | 10.1111/j.1476-5381.2011.01697.x |
| KCNQ4 | L | 281 | S | LOF     |   |   |   |  |  | -0.9   |  |         |                                                  | 10.1111/j.1476-5381.2011.01697.x |
| KCNQ4 | G | 285 | S | LOF     |   |   |   |  |  | -0.9   |  |         |                                                  | 10.1111/j.1476-5381.2011.01697.x |
| KCNQ4 | G | 296 | S | LOF     |   |   |   |  |  | -0.9   |  |         |                                                  | 10.1111/j.1476-5381.2011.01697.x |
| KCNQ4 | L | 274 | H | LOF     |   |   |   |  |  |        |  | reduced |                                                  | 10.1111/jcmm.12080               |
| KCNQ4 | W | 276 | S | LOF     |   |   |   |  |  |        |  | reduced |                                                  | 10.1111/jcmm.12080               |
| KCNQ4 | L | 281 | S | LOF     |   |   |   |  |  | -13.11 |  | reduced |                                                  | 10.1111/jcmm.12080               |
| KCNQ4 | G | 285 | C | LOF     |   |   |   |  |  |        |  | reduced |                                                  | 10.1111/jcmm.12080               |
| KCNQ4 | G | 285 | S | LOF     |   |   |   |  |  |        |  | reduced |                                                  | 10.1111/jcmm.12080               |
| KCNQ4 | G | 296 | S | LOF     |   |   |   |  |  | -13.79 |  | reduced |                                                  | 10.1111/jcmm.12080               |
| KCNQ4 | G | 321 | S | LOF     |   |   |   |  |  | -14.09 |  | reduced |                                                  | 10.1111/jcmm.12080               |
| KCNQ4 | D | 266 | Y | LOF     |   |   |   |  |  | -0.3   |  |         |                                                  | 10.1038/s41598-018-34876-9       |
| KCNQ4 | L | 47  | P | LOF     | 0 | 0 |   |  |  | -60    |  |         | current estimated from figure                    | 10.1002/humu.23698               |
| KCNQ4 | N | 264 | S | LOF     |   |   |   |  |  | -96.9  |  |         |                                                  | 10.1038/s12276-019-0300-9        |
| KCNQ4 | S | 269 | F | LOF     |   |   |   |  |  | -103   |  |         |                                                  | 10.1038/s12276-019-0300-9        |
| KCNQ4 | S | 273 | A | LOF     |   |   |   |  |  | -74.2  |  |         |                                                  | 10.1038/s12276-019-0300-9        |
| KCNQ4 | T | 278 | A | LOF     |   |   |   |  |  | -87    |  |         |                                                  | 10.1038/s12276-019-0300-9        |
| KCNQ4 | R | 433 | W | LOF     |   |   |   |  |  | -71.6  |  |         |                                                  | 10.1038/s12276-019-0300-9        |



|       |   |     |   |     |       |       |  |  |  |  |  |  |  |         |                                       |  |                             |
|-------|---|-----|---|-----|-------|-------|--|--|--|--|--|--|--|---------|---------------------------------------|--|-----------------------------|
| KCNQ5 | L | 692 | V | LOF | 0.4   | 5.33  |  |  |  |  |  |  |  |         |                                       |  | 10.1101/2021.04.20.21255696 |
| KCNQ5 | Q | 735 | R | LOF | 2.56  | 1.36  |  |  |  |  |  |  |  |         |                                       |  | 10.1101/2021.04.20.21255696 |
| KCNQ5 | F | 165 | I | LOF | 6.49  | -1.02 |  |  |  |  |  |  |  |         |                                       |  | 10.1101/2021.04.20.21255696 |
| KCNQ5 | L | 926 | S | LOF | 3.78  | -0.31 |  |  |  |  |  |  |  |         |                                       |  | 10.1101/2021.04.20.21255696 |
| KCNQ5 | V | 145 | G | LOF | 7.4   | 7.6   |  |  |  |  |  |  |  | reduced | slow activation                       |  | 10.1016/j.ajhg.2017.05.016  |
| KCNQ5 | L | 341 | I | LOF | 3.3   | -3.8  |  |  |  |  |  |  |  | reduced | slow activation                       |  | 10.1016/j.ajhg.2017.05.016  |
| KCNQ5 | S | 448 | I | GOF | -0.4  | 1.5   |  |  |  |  |  |  |  |         | slow activation                       |  | 10.1016/j.ajhg.2017.05.016  |
| KCNQ5 | P | 369 | R | GOF | -30.8 | -3.2  |  |  |  |  |  |  |  |         | fast activation,<br>slow deactivation |  | 10.1016/j.ajhg.2017.05.016  |

**Supplementary Table 2.** Non-synonymous variants in voltage-gated potassium channels used in training and their overall effect on ion channel function (label). The label is based on the original authors' assessment and our independent external validation, with the experimental data shown used to verify the label. For each variant, we assessed whether coexpression yielded significant differences of these parameters in comparison to the wildtype. Hyperpolarizing shifts of the activation curve, depolarizing shifts in the inactivation curve and an increase of peak current amplitude were labeled as gain-of-function. Trafficking defects, depolarizing shifts in the activation curve, hyperpolarizing shifts in the inactivation curve and decrease of peak current amplitude were labeled as loss-of-function. If there were conflicting results, we ranked trafficking defects above gating kinetics above peak current. Variants that did not significantly differ in these regards were labeled as neutral. Abbreviations: LOF – loss-of-function; GOF – gain-of-function.

## References

1. Abidi A, Devaux JJ, Molinari F, et al. A recurrent KCNQ2 pore mutation causing early onset epileptic encephalopathy has a moderate effect on M current but alters subcellular localization of Kv7 channels. *Neurobiology of Disease* 2015; **80**: 80-92.
2. Ambrosino P, Alaimo A, Bartollino S, et al. Epilepsy-causing mutations in Kv7.2 C-terminus affect binding and functional modulation by calmodulin. *Biochimica et Biophysica Acta (BBA) - Molecular Basis of Disease* 2015; **1852**(9): 1856-66.
3. Ambrosino P, Freri E, Castellotti B, et al. Kv7.3 Compound Heterozygous Variants in Early Onset Encephalopathy Reveal Additive Contribution of C-Terminal Residues to PIP2-Dependent K<sup>+</sup> Channel Gating. *Molecular Neurobiology* 2018; **55**(8): 7009-24.
4. Amin AS, Herfst LJ, Delisle BP, et al. Fever-induced QTc prolongation and ventricular arrhythmias in individuals with type 2 congenital long QT syndrome. *Journal of Clinical Investigation* 2008.
5. Anderson CL, Delisle BP, Anson BD, et al. Most LQT2 Mutations Reduce Kv11.1 (hERG) Current by a Class 2 (Trafficking-Deficient) Mechanism. *Circulation* 2006; **113**(3): 365-73.
6. Barro-Soria R. Epilepsy-associated mutations in the voltage sensor of KCNQ3 affect voltage dependence of channel opening. *Journal of General Physiology* 2018; **151**(2): 247-57.
7. Bezzina C. A common polymorphism in KCNH2 (HERG) hastens cardiac repolarization. *Cardiovascular Research* 2003; **59**(1): 27-36.

8. Bhalla T, Rosenthal JJC, Holmgren M, Reenan R. Control of human potassium channel inactivation by editing of a small mRNA hairpin. *Nature Structural & Molecular Biology* 2004; **11**(10): 950-6.
9. Borgatti R, Zucca C, Cavallini A, et al. A novel mutation in KCNQ2 associated with BFNC, drug resistant epilepsy, and mental retardation. *Neurology* 2004; **63**(1): 57-65.
10. Bretschneider F, Wrisch A, Lehmann-Horn F, Grissmer S. Expression in mammalian cells and electrophysiological characterization of two mutant Kv1.1 channels causing episodic ataxia type 1 (EA-1). *European Journal of Neuroscience* 1999; **11**(7): 2403-12.
11. Brugada R, Hong K, Dumaine R, et al. Sudden Death Associated With Short-QT Syndrome Linked to Mutations in HERG. *Circulation* 2004; **109**(1): 30-5.
12. Calhoun JD, Vanoye CG, Kok F, George AL, Kearney JA. Characterization of a KCNB1 variant associated with autism, intellectual disability, and epilepsy. *Neurology Genetics* 2017; **3**(6): e198.
13. Cameron JM, Maljevic S, Nair U, et al. Encephalopathies with KCNC1 variants: genotype-phenotype-functional correlations. *Annals of Clinical and Translational Neurology* 2019; **6**(7): 1263-72.
14. Carpenter JC, Männikkö R, Heffner C, et al. Progressive myoclonus epilepsy KCNC1 variant causes a developmental dendritopathy. *Epilepsia* 2021; **62**(5): 1256-67.
15. Chen H, von Hehn C, Kaczmarek LK, Ment LR, Pober BR, Hisama FM. Functional analysis of a novel potassium channel (KCNA1) mutation in hereditary myokymia. *Neurogenetics* 2006; **8**(2): 131-5.
16. Chen J, Zou A, Splawski I, Keating MT, Sanguinetti MC. Long QT Syndrome-associated Mutations in the Per-Arnt-Sim (PAS) Domain of HERG Potassium Channels Accelerate Channel Deactivation. *Journal of Biological Chemistry* 1999; **274**(15): 10113-8.
17. Chen S-H, Fu S-J, Huang J-J, Tang C-Y. The episodic ataxia type 1 mutation I262T alters voltage-dependent gating and disrupts protein biosynthesis of human Kv1.1 potassium channels. *Scientific Reports* 2016; **6**(1).
18. Christophersen IE, Olesen MS, Liang B, et al. Genetic variation in KCNA5: impact on the atrial-specific potassium current IKur in patients with lone atrial fibrillation. *European Heart Journal* 2012; **34**(20): 1517-25.
19. DAdamo MC, Gallenmüller C, Servettini I, et al. Novel phenotype associated with a mutation in the KCNA1(Kv1.1) gene. *Frontiers in Physiology* 2015; **5**.
20. DAdamo MC, Imbrici P, Sponcichetti F, Pessia M. Mutations in the KCNA1 gene associated with episodic ataxia type-1 syndrome impair heteromeric voltage-gated K<sup>+</sup> channel function. *The FASEB Journal* 1999; **13**(11): 1335-45.
21. Dedek K, Kunath B, Kananura C, Reuner U, Jentsch TJ, Steinlein OK. Myokymia and neonatal epilepsy caused by a mutation in the voltage sensor of the KCNQ2 K<sup>+</sup> channel. *Proceedings of the National Academy of Sciences* 2001; **98**(21): 12272-7.
22. Demos MK, Macri V, Farrell K, et al. A novel KCNA1 mutation associated with global delay and persistent cerebellar dysfunction. *Movement Disorders* 2009; **24**(5): 778-82.
23. Devaux J, Abidi A, Roubertie A, et al. A Kv7.2 mutation associated with early onset epileptic encephalopathy with suppression-burst enhances Kv7/M channel activity. *Epilepsia* 2016; **57**(5): e87-e93.
24. Ding S, Horn R. Tail End of the S6 Segment. *Journal of General Physiology* 2002; **120**(1): 87-97.
25. Drolet B, Simard C, Mizoue L, Roden DM. Human cardiac potassium channel DNA polymorphism modulates access to drug-binding site and causes drug resistance. *Journal of Clinical Investigation* 2005; **115**(8): 2209-13.
26. Duarri A, Nibbeling EAR, Fokkens MR, et al. Functional Analysis Helps to Define KCNC3 Mutational Spectrum in Dutch Ataxia Cases. *PLOS ONE* 2015; **10**(3): e0116599.
27. Eldstrom J, Xu H, Werry D, et al. Mechanistic basis for LQT1 caused by S3 mutations in the KCNQ1 subunit of IKs. *Journal of General Physiology* 2010; **135**(5): 433-48.
28. Figueroa KP, Minassian NA, Stevanin G, et al. KCNC3: phenotype, mutations, channel biophysics—a study of 260 familial ataxia patients. *Human Mutation* 2010; **31**(2): 191-6.

29. Füll Y, Seebohm G, Lerche H, Maljevic S. A conserved threonine in the S1-S2 loop of KV7.2 and KV7.3 channels regulates voltage-dependent activation. *Pflügers Archiv - European Journal of Physiology* 2012; **465**(6): 797-804.
30. Gallego-Irardi C, Bickford JS, Khare S, et al. KCNC3R420H, a K<sup>+</sup> channel mutation causative in spinocerebellar ataxia 13 displays aberrant intracellular trafficking. *Neurobiology of Disease* 2014; **71**: 270-9.
31. Gao Y, Yechikov S, Vázquez AE, Chen D, Nie L. Impaired surface expression and conductance of the KCNQ 4 channel lead to sensorineural hearing loss. *Journal of Cellular and Molecular Medicine* 2013; **17**(7): 889-900.
32. Gianulis EC, Trudeau MC. Rescue of Aberrant Gating by a Genetically Encoded PAS (Per-Arnt-Sim) Domain in Several Long QT Syndrome Mutant Human Ether-à-go-go-related Gene Potassium Channels. *Journal of Biological Chemistry* 2011; **286**(25): 22160-9.
33. Glaudemans B, van der Wijst J, Scola RH, et al. A missense mutation in the Kv1.1 voltage-gated potassium channel-encoding gene KCNA1 is linked to human autosomal dominant hypomagnesemia. *Journal of Clinical Investigation* 2009; **119**(4): 936-42.
34. Gomis-Pérez C, Urrutia J, Marcé-Grau A, et al. Homomeric Kv7.2 current suppression is a common feature in KCNQ2 epileptic encephalopathy. *Epilepsia* 2018; **60**(1): 139-48.
35. Gong Q, Keeney DR, Molinari M, Zhou Z. Degradation of Trafficking-defective Long QT Syndrome Type II Mutant Channels by the Ubiquitin-Proteasome Pathway. *Journal of Biological Chemistry* 2005; **280**(19): 19419-25.
36. Graves TD, Rajakulendran S, Zuberi SM, et al. Nongenetic factors influence severity of episodic ataxia type 1 in monozygotic twins. *Neurology* 2010; **75**(4): 367-72.
37. Hackos DH, Chang T-H, Swartz KJ. Scanning the Intracellular S6 Activation Gate in the Shaker K<sup>+</sup> Channel. *Journal of General Physiology* 2002; **119**(6): 521-31.
38. Hasan S, Bove C, Silvestri G, et al. A channelopathy mutation in the voltage-sensor discloses contributions of a conserved phenylalanine to gating properties of Kv1.1 channels and ataxia. *Scientific Reports* 2017; **7**(1).
39. Hayashi K, Konno T, Tada H, et al. Functional Characterization of Rare Variants Implicated in Susceptibility to Lone Atrial Fibrillation. *Circulation: Arrhythmia and Electrophysiology* 2015; **8**(5): 1095-104.
40. Helbig KL, Hedrich UBS, Shinde DN, et al. A recurrent mutation in KCNA2 as a novel cause of hereditary spastic paraplegia and ataxia. *Annals of Neurology* 2016; **80**(4).
41. Huang F-D, Chen J, Lin M, Keating MT, Sanguinetti MC. Long-QT Syndrome-Associated Missense Mutations in the Pore Helix of the HERG Potassium Channel. *Circulation* 2001; **104**(9): 1071-5.
42. Hunter J, Maljevic S, Shankar A, et al. Subthreshold changes of voltage-dependent activation of the KV7.2 channel in neonatal epilepsy. *Neurobiology of Disease* 2006; **24**(1): 194-201.
43. Imbrici P, Altamura C, Gualandi F, et al. A novel KCNA1 mutation in a patient with paroxysmal ataxia, myokymia, painful contractures and metabolic dysfunctions. *Molecular and Cellular Neuroscience* 2017; **83**: 6-12.
44. Imbrici P, Cusimano A, DAdamo M, Curtis AD, Pessia M. Functional characterization of an episodic ataxia type-1 mutation occurring in the S1 segment of hKv1.1 channels. *Pflügers Archiv - European Journal of Physiology* 2003; **446**(3): 373-9.
45. Imbrici P, Gualandi F, DAdamo MC, et al. A novel KCNA1 mutation identified in an Italian family affected by episodic ataxia type 1. *Neuroscience* 2008; **157**(3): 577-87.
46. Ishida IG, Rangel-Yescas GE, Carrasco-Zanini J, Islas LD. Voltage-dependent gating and gating charge measurements in the Kv1.2 potassium channel. *Journal of General Physiology* 2015; **145**(4): 345-58.
47. Johnson WH, Yang P, Yang T, et al. Clinical, Genetic, and Biophysical Characterization of a Homozygous HERG Mutation Causing Severe Neonatal Long QT Syndrome. *Pediatric Research* 2003; **53**(5): 744-8.
48. Jung J, Choi HB, Koh YI, et al. Whole-exome sequencing identifies two novel mutations in KCNQ4 in individuals with nonsyndromic hearing loss. *Scientific Reports* 2018; **8**(1).
49. Jung J, Lin H, Koh YI, et al. Rare KCNQ4 variants found in public databases underlie impaired channel activity that may contribute to hearing impairment. *Experimental & Molecular Medicine* 2019; **51**(8): 1-12.

50. Kang SK, Vanoye CG, Misra SN, et al. Spectrum of K V 2.1 Dysfunction in KCNB1 -Associated Neurodevelopmental Disorders. *Annals of Neurology* 2019; **86**(6): 899-912.
51. Karalok ZS, Megaro A, Cenciarini M, et al. Identification of a New de Novo Mutation Underlying Regressive Episodic Ataxia Type I. *Frontiers in Neurology* 2018; **9**.
52. Kaya N, Alsagob M, DAdamo MC, et al. KCNA4 deficiency leads to a syndrome of abnormal striatum, congenital cataract and intellectual disability. *Journal of Medical Genetics* 2016; **53**(11): 786-92.
53. Kim HJ, Lv P, Sihn C-R, Yamoah EN. Cellular and Molecular Mechanisms of Autosomal Dominant Form of Progressive Hearing Loss, DFNA2. *Journal of Biological Chemistry* 2011; **286**(2): 1517-27.
54. Kortüm F, Caputo V, Bauer CK, et al. Mutations in KCNH1 and ATP6V1B2 cause Zimmermann-Laband syndrome. *Nature Genetics* 2015; **47**(6): 661-7.
55. Krüger J, Schubert J, Kegele J, et al. Loss-of-function variants in the KCNQ5 gene are associated with genetic generalized epilepsies. 2021.
56. Kubisch C, Schroeder BC, Friedrich T, et al. KCNQ4, a Novel Potassium Channel Expressed in Sensory Outer Hair Cells, Is Mutated in Dominant Deafness. *Cell* 1999; **96**(3): 437-46.
57. Lacroix JJ, Pless SA, Maragliano L, et al. Intermediate state trapping of a voltage sensor. *Journal of General Physiology* 2012; **140**(6): 635-52.
58. Lassche S, Lainez S, Bloem BR, et al. A novel KCNA1 mutation causing episodic ataxia type I. *Muscle & Nerve* 2014; **50**(2): 289-91.
59. Lee H, Lin M-CA, Kornblum HI, Papazian DM, Nelson SF. Exome sequencing identifies de novo gain of function missense mutation in KCND2 in identical twins with autism and seizures that slows potassium channel inactivation. *Human Molecular Genetics* 2014; **23**(13): 3481-9.
60. Lee I-C, Yang J-J, Wong S-H, Liou Y-M, Li S-Y. Heteromeric Kv7.2 current changes caused by loss-of-function of KCNQ2 mutations are correlated with long-term neurodevelopmental outcomes. *Scientific Reports* 2020; **10**(1).
61. Lehman A, Thouta S, Mancini GMS, et al. Loss-of-Function and Gain-of-Function Mutations in KCNQ5 Cause Intellectual Disability or Epileptic Encephalopathy. *The American Journal of Human Genetics* 2017; **101**(1): 65-74.
62. Leitner MG, Feuer A, Ebers O, Schreiber DN, Halaszovich CR, Oliver D. Restoration of ion channel function in deafness-causing KCNQ4 mutants by synthetic channel openers. *British Journal of Pharmacology* 2012; **165**(7): 2244-59.
63. Li B, Mendenhall JL, Kroncke BM, et al. Predicting the Functional Impact of KCNQ1 Variants of Unknown Significance. *Circulation: Cardiovascular Genetics* 2017; **10**(5).
64. Maghera J, Li J, Lamothe SM, et al. Familial neonatal seizures caused by the Kv7.3 selectivity filter mutation T313I. *Epilepsia Open* 2020; **5**(4): 562-73.
65. Maljevic S, Naros G, Yalçın Ö, et al. Temperature and pharmacological rescue of a folding-defective, dominant-negative KV7.2 mutation associated with neonatal seizures. *Human Mutation* 2011; **32**(10): E2283-E93.
66. Maljevic S, Vejzovic S, Bernhard MK, et al. Novel KCNQ3 Mutation in a Large Family with Benign Familial Neonatal Epilepsy: A Rare Cause of Neonatal Seizures. *Molecular Syndromology* 2016; **7**(4): 189-96.
67. Martinez-Morales E, Snyders DJ, Labro AJ. Mutations in the S6 Gate Isolate a Late Step in the Activation Pathway and Reduce 4-AP Sensitivity in Shaker Kv Channel. *Biophysical Journal* 2014; **106**(1): 134-44.
68. Masnada S, Hedrich UBS, Gardella E, et al. Clinical spectrum and genotype-phenotype associations of KCNA2-related encephalopathies. *Brain* 2017; **140**(9): 2337-54.
69. Mathur R, Zhou J, Babila T, Koren G. Ile-177 and Ser-180 in the S1 Segment Are Critically Important in Kv1.1 Channel Function. *Journal of Biological Chemistry* 1999; **274**(17): 11487-93.
70. McKeown L, Burnham MP, Hodson C, Jones OT. Identification of an Evolutionarily Conserved Extracellular Threonine Residue Critical for Surface Expression and Its Potential Coupling of Adjacent Voltage-sensing and Gating Domains in Voltage-gated Potassium Channels. *Journal of Biological Chemistry* 2008; **283**(44): 30421-32.

71. Mencía Á, González-Nieto D, Modamio-Høybjør S, et al. A novel KCNQ4 pore-region mutation (p.G296S) causes deafness by impairing cell-surface channel expression. *Human Genetics* 2007; **123**(1): 41-53.
72. Mestre TA, Manole A, MacDonald H, et al. A novel KCNA1 mutation in a family with episodic ataxia and malignant hyperthermia. *neurogenetics* 2016; **17**(4): 245-9.
73. Miceli F, Carotenuto L, Barrese V, et al. A Novel Kv7.3 Variant in the Voltage-Sensing S4 Segment in a Family With Benign Neonatal Epilepsy: Functional Characterization and in vitro Rescue by beta-Hydroxybutyrate. *Frontiers in Physiology* 2020; **11**.
74. Miceli F, Soldovieri MV, Ambrosino P, et al. Early-Onset Epileptic Encephalopathy Caused by Gain-of-Function Mutations in the Voltage Sensor of Kv7.2 and Kv7.3 Potassium Channel Subunits. *Journal of Neuroscience* 2015; **35**(9): 3782-93.
75. Miceli F, Soldovieri MV, Hernandez CC, Shapiro MS, Annunziato L, Tagliatalata M. Gating Consequences of Charge Neutralization of Arginine Residues in the S4 Segment of Kv7.2, an Epilepsy-Linked K<sup>+</sup> Channel Subunit. *Biophysical Journal* 2008; **95**(5): 2254-64.
76. Millichap JJ, Miceli F, Maria MD, et al. Infantile spasms and encephalopathy without preceding neonatal seizures caused by KCNQ2 R198Q, a gain-of-function variant. *Epilepsia* 2016; **58**(1): e10-e5.
77. Minassian NA, Lin M-CA, Papazian DM. Altered Kv3.3 channel gating in early-onset spinocerebellar ataxia type 13. *The Journal of Physiology* 2012; **590**(7): 1599-614.
78. Muona M, Berkovic SF, Dibbens LM, et al. A recurrent de novo mutation in KCNC1 causes progressive myoclonus epilepsy. *Nature Genetics* 2014; **47**(1): 39-46.
79. Nakajima T, Furukawa T, Tanaka T, et al. Novel Mechanism of HERG Current Suppression in LQT2. *Circulation Research* 1998; **83**(4): 415-22.
80. Ogielska EM, Aldrich RW. A Mutation in S6 of Shaker Potassium Channels Decreases the K<sup>+</sup> Affinity of an Ion Binding Site Revealing Ion-Ion Interactions in the Pore. *Journal of General Physiology* 1998; **112**(2): 243-57.
81. Orhan G, Bock M, Schepers D, et al. Dominant-negative effects of KCNQ2 mutations are associated with epileptic encephalopathy. *Annals of Neurology* 2014; **75**(3): 382-94.
82. Papazian DM, Shao XM, Seoh S-A, Mock AF, Huang Y, Wainstock DH. Electrostatic interactions of S4 voltage sensor in shaker K<sup>+</sup> channel. *Neuron* 1995; **14**(6): 1293-301.
83. Papazian DM, Timpe LC, Jan YN, Jan LY. Alteration of voltage-dependence of Shaker potassium channel by mutations in the S4 sequence. *Nature* 1991; **349**(6307): 305-10.
84. Park J, Koko M, Hedrich UBS, et al. KCNC1 -related disorders: new de novo variants expand the phenotypic spectrum. *Annals of Clinical and Translational Neurology* 2019; **6**(7): 1319-26.
85. Paulussen A, Raes A, Matthijs G, Snyders DJ, Cohen N, Aerssens J. A Novel Mutation (T65P) in the PAS Domain of the Human Potassium Channel HERG Results in the Long QT Syndrome by Trafficking Deficiency. *Journal of Biological Chemistry* 2002; **277**(50): 48610-6.
86. Perozo E, MacKinnon R, Bezanilla F, Stefani E. Gating currents from a nonconducting mutant reveal open-closed conformations in Shaker K<sup>+</sup> channels. *Neuron* 1993; **11**(2): 353-8.
87. Perozo E, Santacruz-Toloza L, Stefani E, Bezanilla F, Papazian DM. S4 mutations alter gating currents of Shaker K channels. *Biophysical Journal* 1994; **66**(2): 345-54.
88. Piippo K, Laitinen P, Swan H, et al. Homozygosity for a HERG potassium channel mutation causes a severe form of long QT syndrome: identification of an apparent founder mutation in the Finns. *Journal of the American College of Cardiology* 2000; **35**(7): 1919-25.
89. Rajakulendran S, Tan SV, Matthews E, et al. A PATIENT WITH EPISODIC ATAXIA AND PARAMYOTONIA CONGENITA DUE TO MUTATIONS IN KCNA1 AND SCN4A. *Neurology* 2009; **73**(12): 993-5.
90. Rezazadeh S, Kurata HT, Claydon TW, Kehl SJ, Fedida D. An Activation Gating Switch in Kv1.2 Is Localized to a Threonine Residue in the S2-S3 Linker. *Biophysical Journal* 2007; **93**(12): 4173-86.
91. Saitsu H, Akita T, Tohyama J, et al. De novo KCNB1 mutations in infantile epilepsy inhibit repetitive neuronal firing. *Scientific Reports* 2015; **5**(1).

92. Sands TT, Miceli F, Lesca G, et al. Autism and developmental disability caused by KCNQ3 gain-of-function variants. *Annals of Neurology* 2019; **86**(2): 181-92.
93. Sanguinetti MC, Curran ME, Spector PS, Keating MT. Spectrum of HERG K<sup>+</sup>-channel dysfunction in an inherited cardiac arrhythmia. *Proceedings of the National Academy of Sciences* 1996; **93**(5): 2208-12.
94. Schnekenberg RP, Perkins EM, Miller JW, et al. De novo point mutations in patients diagnosed with ataxic cerebral palsy. *Brain* 2015; **138**(7): 1817-32.
95. Schroeder BC, Kubisch C, Stein V, Jentsch TJ. Moderate loss of function of cyclic-AMP-modulated KCNQ2/KCNQ3 K<sup>+</sup> channels causes epilepsy. *Nature* 1998; **396**(6712): 687-90.
96. Schwarz N, Weber Y, Muhle H, et al. Whole-Exome Sequencing in NF1-Related West Syndrome Leads to the Identification of KCNC2 as a Novel Candidate Gene for Epilepsy. *Neuropediatrics* 2020; **51**(05): 368-72.
97. Shin DH, Jung J, Koh YI, et al. A recurrent mutation in KCNQ4 in Korean families with nonsyndromic hearing loss and rescue of the channel activity by KCNQ activators. *Human Mutation* 2018.
98. Simard C, Drolet B, Yang P, Kim RB, Roden DM. Polymorphism Screening in the Cardiac K<sup>+</sup> Channel Gene KCNA5. *Clinical Pharmacology & Therapeutics* 2005; **77**(3): 138-44.
99. Simons C, Rash LD, Crawford J, et al. Mutations in the voltage-gated potassium channel gene KCNH1 cause Temple-Baraitser syndrome and epilepsy. *Nature Genetics* 2014; **47**(1): 73-7.
100. Singh NA. KCNQ2 and KCNQ3 potassium channel genes in benign familial neonatal convulsions: expansion of the functional and mutation spectrum. *Brain* 2003; **126**(12): 2726-37.
101. Smith-Maxwell CJ, Ledwell JL, Aldrich RW. Uncharged S4 Residues and Cooperativity in Voltage-dependent Potassium Channel Activation. *Journal of General Physiology* 1998; **111**(3): 421-39.
102. Soldovieri MV, Ambrosino P, Mosca I, et al. Early-onset epileptic encephalopathy caused by a reduced sensitivity of Kv7.2 potassium channels to phosphatidylinositol 4,5-bisphosphate. *Scientific Reports* 2016; **6**(1).
103. Soldovieri MV, Ambrosino P, Mosca I, et al. Epileptic Encephalopathy In A Patient With A Novel Variant In The Kv7.2 S2 Transmembrane Segment: Clinical, Genetic, and Functional Features. *International Journal of Molecular Sciences* 2019; **20**(14): 3382.
104. Soler-Llavina GJ, Chang T-H, Swartz KJ. Functional Interactions at the Interface between Voltage-Sensing and Pore Domains in the Shaker Kv Channel. *Neuron* 2006; **52**(4): 623-34.
105. Spauschus A, Eunson L, Hanna MG, Kullmann DM. Functional Characterization of a Novel Mutation in KCNA1 in Episodic Ataxia Type 1 Associated with Epilepsy. *Annals of the New York Academy of Sciences* 1999; **868**: 442-6.
106. Sukhareva M, Hackos DH, Swartz KJ. Constitutive Activation of the Shaker Kv Channel. *Journal of General Physiology* 2003; **122**(5): 541-56.
107. Sun Y, Quan X-Q, Fromme S, et al. A novel mutation in the KCNH2 gene associated with short QT syndrome. *Journal of Molecular and Cellular Cardiology* 2011; **50**(3): 433-41.
108. Syrbe S, Hedrich UBS, Riesch E, et al. De novo loss- or gain-of-function mutations in KCNA2 cause epileptic encephalopathy. *Nature Genetics* 2015; **47**(4): 393-9.
109. Thiffault I, Speca DJ, Austin DC, et al. A novel epileptic encephalopathy mutation in KCNB1 disrupts Kv2.1 ion selectivity, expression, and localization. *Journal of General Physiology* 2015; **146**(5): 399-410.
110. Tomlinson SE, Rajakulendran S, Tan SV, et al. Clinical, genetic, neurophysiological and functional study of new mutations in episodic ataxia type 1. *Journal of Neurology, Neurosurgery & Psychiatry* 2013; **84**(10): 1107-12.
111. Torkamani A, Bersell K, Jorge BS, et al. De novo KCNB1 mutations in epileptic encephalopathy. *Annals of Neurology* 2014; **76**(4): 529-40.
112. Tristán-Clavijo E, Scholl FG, Macaya A, et al. Dominant-negative mutation p.Arg324Thr in KCNA1 impairs Kv1.1 channel function in episodic ataxia. *Movement Disorders* 2016; **31**(11): 1743-8.
113. Uehara A, Nakamura Y, Shioya T, Hirose S, Yasukochi M, Uehara K. Altered KCNQ3 Potassium Channel Function Caused by the W309R Pore-Helix Mutation Found in Human Epilepsy. *Journal of Membrane Biology* 2008; **222**(2): 55-63.



114. Upadhyay SK, Nagarajan P, Mathew MK. Potassium channel opening: a subtle two-step. *The Journal of Physiology* 2009; **587**(15): 3851-68.
115. van der Wijst J, Glaudemans B, Venselaar H, et al. Functional Analysis of the Kv1.1 N255D Mutation Associated with Autosomal Dominant Hypomagnesemia. *Journal of Biological Chemistry* 2010; **285**(1): 171-8.
116. van der Wijst J, Konrad M, Verkaart SAJ, et al. A de novo KCNA1 Mutation in a Patient with Tetany and Hypomagnesemia. *Nephron* 2018; **139**(4): 359-66.
117. Vanoye CG, Desai RR, Fabre KL, et al. High-Throughput Functional Evaluation of KCNQ1 Decrypts Variants of Unknown Significance. *Circulation: Genomic and Precision Medicine* 2018; **11**(11).
118. Verkerk A, Wilders R, Schulzebahr E, et al. Role of sequence variations in the human ether-a-go-go-related gene (HERG, KCNH2) in the Brugada syndrome. *Cardiovascular Research* 2005; **68**(3): 441-53.
119. Volkers L, Rook MB, Das JHG, et al. Functional analysis of novel KCNQ2 mutations found in patients with Benign Familial Neonatal Convulsions. *Neuroscience Letters* 2009; **462**(1): 24-9.
120. Wang J, Li Y, Hui Z, et al. Functional analysis of potassium channels in Kv7.2 G271V mutant causing early onset familial epilepsy. *Brain Research* 2015; **1616**: 112-22.
121. Watanabe I, Zhu J, Sutachan JJ, Gottschalk A, Recio-Pinto E, Thornhill WB. The glycosylation state of Kv1.2 potassium channels affects trafficking, gating, and simulated action potentials. *Brain Research* 2007; **1144**: 1-18.
122. Waters MF, Minassian NA, Stevanin G, et al. Mutations in voltage-gated potassium channel KCNC3 cause degenerative and developmental central nervous system phenotypes. *Nature Genetics* 2006; **38**(4): 447-51.
123. Wuttke TV, Penzien J, Fauler M, et al. Neutralization of a negative charge in the S1-S2 region of the KV7.2 (KCNQ2) channel affects voltage-dependent activation in neonatal epilepsy. *The Journal of Physiology* 2008; **586**(2): 545-55.
124. Xia X, Zhang Q, Jia Y, et al. Molecular basis and restoration of function deficiencies of Kv7.4 variants associated with inherited hearing loss. *Hearing Research* 2020; **388**: 107884.
125. Yang H, Gao Z, Li P, et al. A Theoretical Model for Calculating Voltage Sensitivity of Ion Channels and the Application on Kv1.2 Potassium Channel. *Biophysical Journal* 2012; **102**(8): 1815-25.
126. Yang P, Kanki H, Drolet B, et al. Allelic Variants in Long-QT Disease Genes in Patients With Drug-Associated Torsades de Pointes. *Circulation* 2002; **105**(16): 1943-8.
127. Yang Y, Li J, Lin X, et al. Novel KCNA5 loss-of-function mutations responsible for atrial fibrillation. *Journal of Human Genetics* 2009; **54**(5): 277-83.
128. Yang Y, Vasylyev DV, Dib-Hajj F, et al. Multistate Structural Modeling and Voltage-Clamp Analysis of Epilepsy/Autism Mutation Kv10.2-R327H Demonstrate the Role of This Residue in Stabilizing the Channel Closed State. *Journal of Neuroscience* 2013; **33**(42): 16586-93.
129. Yang Y, Yan Y, Sigworth FJ. How Does the W434F Mutation Block Current in Shaker Potassium Channels? *Journal of General Physiology* 1997; **109**(6): 779-89.
130. Yang Y-C, Lin S, Chang P-C, Lin H-C, Kuo C-C. Functional Extension of Amino Acid Triads from the Fourth Transmembrane Segment (S4) into Its External Linker in Shaker K<sup>+</sup> Channels. *Journal of Biological Chemistry* 2011; **286**(43): 37503-14.
131. Yang Y-C, Own C-J, Kuo C-C. A hydrophobic element secures S4 voltage sensor in position in resting Shaker K<sup>+</sup> channels. *The Journal of Physiology* 2007; **582**(3): 1059-72.
132. Yifrach O, MacKinnon R. Energetics of Pore Opening in a Voltage-Gated K<sup>+</sup> Channel. *Cell* 2002; **111**(2): 231-9.
133. Yin X-M, Lin J-H, Cao L, et al. Familial paroxysmal kinesigenic dyskinesia is associated with mutations in the KCNA1 gene. *Human Molecular Genetics* 2017; **27**(4): 625-37.
134. Yool AJ, Schwarz TL. Alteration of ionic selectivity of a K<sup>+</sup> channel by mutation of the H5 region. *Nature* 1991; **349**(6311): 700-4.
135. Yool AJ, Schwarz TL. Interactions of the H5 pore region and hydroxylamine with N-type inactivation in the Shaker K<sup>+</sup> channel. *Biophysical Journal* 1995; **68**(2): 448-58.

136. Zerr P, Adelman JP, Maylie J. Episodic Ataxia Mutations in Kv1.1 Alter Potassium Channel Function by Dominant Negative Effects or Haploinsufficiency. *The Journal of Neuroscience* 1998; **18**(8): 2842-8.
137. Zerr P, Adelman JP, Maylie J. Characterization of three episodic ataxia mutations in the human Kv1.1 potassium channel. *FEBS Letters* 1998; **431**(3): 461-4.
138. Zhang J, Kim EC, Chen C, et al. Identifying mutation hotspots reveals pathogenetic mechanisms of KCNQ2 epileptic encephalopathy. *Scientific Reports* 2020; **10**(1).
139. Zhang Y, Tachtsidis G, Schob C, et al. KCND2 variants associated with global developmental delay differentially impair Kv4.2 channel gating. *Human Molecular Genetics* 2021; **30**(23): 2300-14.
140. Zhou Z, Gong Q, Epstein ML, January CT. HERG Channel Dysfunction in Human Long QT Syndrome. *Journal of Biological Chemistry* 1998; **273**(33): 21061-6.
141. Zhu J, Alsaber R, Zhao J, Ribeiro-Hurley E, Thornhill WB. Characterization of the Kv1.1 I262T and S342I mutations associated with episodic ataxia 1 with distinct phenotypes. *Archives of Biochemistry and Biophysics* 2012; **524**(2): 99-105.
142. Zhuang W, Yan Z. The S2-S3 Loop of Kv7.4 Channels Is Essential for Calmodulin Regulation of Channel Activation. *Frontiers in Physiology* 2021; **11**.
143. Zuberi SM. A novel mutation in the human voltage-gated potassium channel gene (Kv1.1) associates with episodic ataxia type 1 and sometimes with partial epilepsy. *Brain* 1999; **122**(5): 817-25.

| gene  | pos | aa1 | aa2 | Name                                    | Condition(s)                        | Clinical significance (Last reviewed)                                    | Review status                                        | Accession    | GRCh38Chromosome | GRCh38Location | VariationID | AlleleID(s) | dbSNP ID     | prediction | prob.LOF | prob.Neutral | prob.GOF |
|-------|-----|-----|-----|-----------------------------------------|-------------------------------------|--------------------------------------------------------------------------|------------------------------------------------------|--------------|------------------|----------------|-------------|-------------|--------------|------------|----------|--------------|----------|
| KCNA1 | 1   | M   | L   | NM_000217.3(KCNA1):c.1A>T (p.Met1Leu)   | Episodic ataxia type 1              | Uncertain significance(Last reviewed: May 27, 2019)                      | criteria provided, single submitter                  | VCV000946822 | 12               | 4911379        | 946822      | 926653      | rs776861490  | Neutral    | 0.662    | 0.221        | 0.117    |
| KCNA1 | 1   | M   | R   | NM_000217.3(KCNA1):c.2T>G (p.Met1Arg)   | Episodic ataxia type 1              | Uncertain significance(Last reviewed: Nov 6, 2019)                       | criteria provided, single submitter                  | VCV000967035 | 12               | 4911380        | 967035      | 956894      | rs1947350138 | Neutral    | 0.683    | 0.192        | 0.124    |
| KCNA1 | 1   | M   | V   | NM_000217.3(KCNA1):c.1A>G (p.Met1Val)   | Episodic ataxia type 1              | Benign(Last reviewed: Mar 26, 2018)                                      | criteria provided, single submitter                  | VCV000883201 | 12               | 4911379        | 883201      | 869942      | rs776861490  | Neutral    | 0.656    | 0.224        | 0.12     |
| KCNA1 | 4   | M   | I   | NM_000217.3(KCNA1):c.12G>T (p.Met4Ile)  | not provided                        | Uncertain significance(Last reviewed: Dec 20, 2019)                      | criteria provided, single submitter                  | VCV000586087 | 12               | 4911390        | 586087      | 577272      | rs773128496  | Neutral    | 0.585    | 0.292        | 0.123    |
| KCNA1 | 7   | E   | K   | NM_000217.3(KCNA1):c.19G>A (p.Glu7Lys)  | Episodic ataxia type 1              | Uncertain significance(Last reviewed: Jan 13, 2018)                      | criteria provided, single submitter                  | VCV000883202 | 12               | 4911397        | 883202      | 869943      | rs529968149  | Neutral    | 0.617    | 0.228        | 0.155    |
| KCNA1 | 10  | D   | E   | NM_000217.3(KCNA1):c.30C>G (p.Asp10Glu) | Episodic ataxia type 1              | Uncertain significance(Last reviewed: Dec 3, 2018)                       | criteria provided, single submitter                  | VCV000642028 | 12               | 4911408        | 642028      | 641181      | rs1471834737 | Neutral    | 0.626    | 0.232        | 0.142    |
| KCNA1 | 13  | S   | L   | NM_000217.3(KCNA1):c.38C>T (p.Ser13Leu) | not provided                        | Uncertain significance(Last reviewed: Jul 18, 2019)                      | criteria provided, single submitter                  | VCV001316112 | 12               | 4911416        | 1316112     | 1308514     | NA           | Neutral    | 0.568    | 0.29         | 0.142    |
| KCNA1 | 15  | A   | S   | NM_000217.3(KCNA1):c.43G>T (p.Ala15Ser) | Episodic ataxia type 1              | Uncertain significance(Last reviewed: Apr 6, 2020)                       | criteria provided, single submitter                  | VCV000961458 | 12               | 4911421        | 961458      | 948051      | rs777276806  | Neutral    | 0.647    | 0.216        | 0.137    |
| KCNA1 | 17  | G   | R   | NM_000217.3(KCNA1):c.49G>C (p.Gly17Arg) | Episodic ataxia type 1              | Uncertain significance(Last reviewed: Jul 31, 2019)                      | criteria provided, single submitter                  | VCV000955397 | 12               | 4911427        | 955397      | 948052      | rs1324506346 | Neutral    | 0.669    | 0.192        | 0.138    |
| KCNA1 | 18  | H   | P   | NM_000217.3(KCNA1):c.53A>C (p.His18Pro) | not provided Episodic ataxia type 1 | Uncertain significance(Last reviewed: Jul 17, 2019)                      | criteria provided, multiple submitters, no conflicts | VCV000374425 | 12               | 4911431        | 374425      | 361311      | rs367921276  | Neutral    | 0.642    | 0.224        | 0.134    |
| KCNA1 | 20  | Q   | H   | NM_000217.3(KCNA1):c.60G>C (p.Gln20His) | not provided Episodic ataxia type 1 | Conflicting interpretations of pathogenicity(Last reviewed: Sep 1, 2021) | criteria provided, conflicting interpretations       | VCV000447612 | 12               | 4911438        | 447612      | 441551      | rs201504073  | Neutral    | 0.606    | 0.254        | 0.141    |
| KCNA1 | 21  | D   | N   | NM_000217.3(KCNA1):c.61G>A (p.Asp21Asn) | not provided                        | Uncertain significance(Last reviewed: Jun 5, 2019)                       | criteria provided, single submitter                  | VCV000804963 | 12               | 4911439        | 804963      | 793434      | rs747465523  | Neutral    | 0.611    | 0.238        | 0.15     |
| KCNA1 | 24  | Y   | H   | NM_000217.3(KCNA1):c.70T>C (p.Tyr24His) | Episodic ataxia type 1              | Uncertain significance(Last reviewed: Jul 11, 2019)                      | criteria provided, single submitter                  | VCV000950047 | 12               | 4911448        | 950047      | 926654      | rs1224258529 | Neutral    | 0.664    | 0.218        | 0.117    |
| KCNA1 | 26  | R   | W   | NM_000217.3(KCNA1):c.76C>T (p.Arg26Trp) | not specified                       | Uncertain significance(Last reviewed: Oct 5, 2015)                       | criteria provided, single submitter                  | VCV000435546 | 12               | 4911454        | 435546      | 429429      | rs373645838  | Neutral    | 0.617    | 0.259        | 0.124    |
| KCNA1 | 32  | D   | H   | NM_000217.3(KCNA1):c.94G>C (p.Asp32His) | not provided                        | Uncertain significance(Last reviewed: Sep 6, 2019)                       | criteria provided, single submitter                  | VCV001318467 | 12               | 4911472        | 1318467     | 1308251     | NA           | Neutral    | 0.568    | 0.274        | 0.158    |

| gene  | pos | aa1 | aa2 | Name                                      | Condition(s)                                   | Clinical significance (Last reviewed)                                    | Review status                                        | Accession    | GRCh38Chromosome | GRCh38Location | VariationID | AlleleID(s) | dbSNP ID     | prediction | prob.LOF | prob.Neutral | prob.GOF |
|-------|-----|-----|-----|-------------------------------------------|------------------------------------------------|--------------------------------------------------------------------------|------------------------------------------------------|--------------|------------------|----------------|-------------|-------------|--------------|------------|----------|--------------|----------|
| KCNA1 | 32  | D   | Y   | NM_000217.3(KCNA1):c.94G>T (p.Asp32Tyr)   | not provided                                   | Uncertain significance(Last reviewed: Nov 19, 2021)                      | criteria provided, single submitter                  | VCV001316825 | 12               | 4911472        | 1316825     | 1307919     | NA           | Neutral    | 0.549    | 0.291        | 0.16     |
| KCNA1 | 46  | L   | M   | NM_000217.3(KCNA1):c.136C>A (p.Leu46Met)  | Episodic ataxia type 1 not provided            | Conflicting interpretations of pathogenicity(Last reviewed: Dec 1, 2020) | criteria provided, conflicting interpretations       | VCV000639858 | 12               | 4911514        | 639858      | 641182      | rs149959487  | LOF        | 0.842    | 0.086        | 0.072    |
| KCNA1 | 46  | L   | P   | NM_000217.3(KCNA1):c.137T>C (p.Leu46Pro)  | not provided                                   | Uncertain significance(Last reviewed: May 29, 2019)                      | criteria provided, single submitter                  | VCV001191407 | 12               | 4911515        | 1191407     | 1181016     | NA           | LOF        | 0.848    | 0.082        | 0.07     |
| KCNA1 | 60  | N   | S   | NM_000217.3(KCNA1):c.179A>G (p.Asn60Ser)  | Episodic ataxia type 1                         | Uncertain significance(Last reviewed: Mar 2, 2020)                       | criteria provided, single submitter                  | VCV001003091 | 12               | 4911557        | 1003091     | 995242      | rs752067203  | LOF        | 0.717    | 0.153        | 0.129    |
| KCNA1 | 71  | R   | H   | NM_000217.3(KCNA1):c.212G>A (p.Arg71His)  | Episodic ataxia type 1                         | Uncertain significance(Last reviewed: Jan 13, 2018)                      | criteria provided, single submitter                  | VCV000883997 | 12               | 4911590        | 883997      | 869944      | rs1947351910 | LOF        | 0.754    | 0.155        | 0.091    |
| KCNA1 | 75  | P   | H   | NM_000217.3(KCNA1):c.224C>A (p.Pro75His)  | Episodic ataxia type 1 Inborn genetic diseases | Uncertain significance(Last reviewed: Jun 28, 2019)                      | criteria provided, multiple submitters, no conflicts | VCV000463862 | 12               | 4911602        | 463862      | 462249      | rs897263951  | LOF        | 0.752    | 0.127        | 0.121    |
| KCNA1 | 92  | I   | V   | NM_000217.3(KCNA1):c.274A>G (p.Ile92Val)  | Episodic ataxia type 1                         | Uncertain significance(Last reviewed: Jan 13, 2018)                      | criteria provided, single submitter                  | VCV000883998 | 12               | 4911652        | 883998      | 869945      | rs962399769  | LOF        | 0.827    | 0.09         | 0.083    |
| KCNA1 | 97  | Q   | K   | NM_000217.3(KCNA1):c.289C>A (p.Gln97Lys)  | Episodic ataxia type 1                         | Uncertain significance(Last reviewed: Nov 6, 2019)                       | criteria provided, single submitter                  | VCV000942661 | 12               | 4911667        | 942661      | 936146      | rs1166033590 | LOF        | 0.844    | 0.079        | 0.076    |
| KCNA1 | 104 | R   | S   | NM_000217.3(KCNA1):c.312G>T (p.Arg104Ser) | Episodic ataxia type 1                         | Uncertain significance(Last reviewed: Mar 13, 2019)                      | criteria provided, single submitter                  | VCV000863541 | 12               | 4911690        | 863541      | 839993      | rs1947352517 | LOF        | 0.751    | 0.147        | 0.102    |
| KCNA1 | 106 | V   | A   | NM_000217.3(KCNA1):c.317T>C (p.Val106Ala) | Myokymial Episodic ataxia type 1               | Uncertain significance(Last reviewed: Jan 13, 2018)                      | criteria provided, single submitter                  | VCV000309144 | 12               | 4911695        | 309144      | 332921      | rs886049510  | Neutral    | 0.7      | 0.191        | 0.108    |
| KCNA1 | 106 | V   | I   | NM_000217.3(KCNA1):c.316G>A (p.Val106Ile) | Episodic ataxia type 1                         | Uncertain significance(Last reviewed: Feb 27, 2018)                      | criteria provided, single submitter                  | VCV001056453 | 12               | 4911694        | 1056453     | 1047988     | NA           | Neutral    | 0.642    | 0.242        | 0.116    |
| KCNA1 | 114 | S   | F   | NM_000217.3(KCNA1):c.341C>T (p.Ser114Phe) | Episodic ataxia type 1                         | Uncertain significance(Last reviewed: Jan 25, 2020)                      | criteria provided, single submitter                  | VCV000661566 | 12               | 4911719        | 661566      | 641183      | rs1591627522 | LOF        | 0.742    | 0.157        | 0.1      |
| KCNA1 | 121 | E   | K   | NM_000217.3(KCNA1):c.361G>A (p.Glu121Lys) | Episodic ataxia type 1                         | Uncertain significance(Last reviewed: Aug 20, 2020)                      | criteria provided, single submitter                  | VCV001014549 | 12               | 4911739        | 1014549     | 1010473     | rs1463513823 | LOF        | 0.753    | 0.104        | 0.143    |
| KCNA1 | 124 | E   | K   | NM_000217.3(KCNA1):c.370G>A (p.Glu124Lys) | Episodic ataxia type 1                         | Uncertain significance(Last reviewed: Aug 3, 2017)                       | criteria provided, single submitter                  | VCV000463863 | 12               | 4911748        | 463863      | 462507      | rs1555085687 | LOF        | 0.772    | 0.12         | 0.108    |
| KCNA1 | 138 | K   | Q   | NM_000217.3(KCNA1):c.412A>C (p.Lys138Gln) | Myokymial Episodic ataxia type 1               | Uncertain significance(Last reviewed: Jan 13, 2018)                      | criteria provided, single submitter                  | VCV000309145 | 12               | 4911790        | 309145      | 317395      | rs886049511  | Neutral    | 0.624    | 0.227        | 0.15     |

| gene  | pos | aa1 | aa2 | Name                                      | Condition(s)                                   | Clinical significance (Last reviewed)                                     | Review status                                        | Accession    | GRCh38Chromosome | GRCh38Location | VariationID | AlleleID(s) | dbSNP ID     | prediction | prob.LOF | prob.Neutral | prob.GOF |
|-------|-----|-----|-----|-------------------------------------------|------------------------------------------------|---------------------------------------------------------------------------|------------------------------------------------------|--------------|------------------|----------------|-------------|-------------|--------------|------------|----------|--------------|----------|
| KCNA1 | 139 | E   | K   | NM_000217.3(KCNA1):c.415G>A (p.Glu139Lys) | not provided                                   | Uncertain significance(Last reviewed: Oct 1, 2018)                        | criteria provided, single submitter                  | VCV000623795 | 12               | 4911793        | 623795      | 612952      | rs1565433107 | LOF        | 0.686    | 0.161        | 0.153    |
| KCNA1 | 141 | E   | K   | NM_000217.3(KCNA1):c.421G>A (p.Glu141Lys) | Episodic ataxia type 1                         | Uncertain significance(Last reviewed: Feb 12, 2020)                       | criteria provided, single submitter                  | VCV000948787 | 12               | 4911799        | 948787      | 926655      | rs934102011  | Neutral    | 0.652    | 0.192        | 0.156    |
| KCNA1 | 149 | Y   | C   | NM_000217.3(KCNA1):c.446A>G (p.Tyr149Cys) | Episodic ataxia type 1                         | Uncertain significance(Last reviewed: Feb 2, 2018)                        | criteria provided, single submitter                  | VCV000880707 | 12               | 4911824        | 880707      | 869946      | rs1947353699 | LOF        | 0.816    | 0.102        | 0.081    |
| KCNA1 | 151 | R   | C   | NM_000217.3(KCNA1):c.451C>T (p.Arg151Cys) | Episodic ataxia type 1                         | Uncertain significance(Last reviewed: Sep 24, 2020)                       | criteria provided, single submitter                  | VCV001023031 | 12               | 4911829        | 1023031     | 1010474     | rs1947353744 | LOF        | 0.826    | 0.086        | 0.088    |
| KCNA1 | 159 | Y   | H   | NM_000217.3(KCNA1):c.475T>C (p.Tyr159His) | not provided Episodic ataxia type 1            | Uncertain significance(Last reviewed: Sep 10, 2020)                       | criteria provided, multiple submitters, no conflicts | VCV000586091 | 12               | 4911853        | 586091      | 577273      | rs764645312  | LOF        | 0.766    | 0.136        | 0.098    |
| KCNA1 | 166 | A   | P   | NM_000217.3(KCNA1):c.496G>C (p.Ala166Pro) | not specified                                  | Uncertain significance(Last reviewed: May 3, 2017)                        | criteria provided, single submitter                  | VCV000447611 | 12               | 4911874        | 447611      | 441554      | rs1179635654 | LOF        | 0.902    | 0.045        | 0.053    |
| KCNA1 | 170 | A   | T   | NM_000217.3(KCNA1):c.508G>A (p.Ala170Thr) | not provided                                   | Uncertain significance(Last reviewed: Oct 1, 2019)                        | criteria provided, single submitter                  | VCV000872570 | 12               | 4911886        | 872570      | 859985      | rs1947354204 | LOF        | 0.892    | 0.028        | 0.08     |
| KCNA1 | 174 | V   | F   | NM_000217.3(KCNA1):c.520G>T (p.Val174Phe) | Inborn genetic diseases Episodic ataxia type 1 | Pathogenic(Last reviewed: Dec 26, 2018)                                   | criteria provided, single submitter                  | VCV000013482 | 12               | 4911898        | 13482       | 28521       | rs104894349  | LOF        | 0.875    | 0.024        | 0.101    |
| KCNA1 | 174 | V   | I   | NM_000217.3(KCNA1):c.520G>A (p.Val174Ile) | Episodic ataxia type 1                         | Uncertain significance(Last reviewed: Feb 23, 2020)                       | criteria provided, single submitter                  | VCV000959065 | 12               | 4911898        | 959065      | 948053      | rs104894349  | LOF        | 0.823    | 0.044        | 0.132    |
| KCNA1 | 177 | I   | N   | NM_000217.3(KCNA1):c.530T>A (p.Ile177Asn) | Episodic ataxia type 1                         | Pathogenic(Last reviewed: Apr 1, 1998)                                    | no assertion criteria provided                       | VCV000013488 | 12               | 4911908        | 13488       | 28527       | rs267607195  | LOF        | 0.94     | 0.01         | 0.05     |
| KCNA1 | 184 | F   | C   | NM_000217.3(KCNA1):c.551T>G (p.Phe184Cys) | Episodic ataxia type 1                         | Pathogenic(Last reviewed: Dec 1, 1995)                                    | no assertion criteria provided                       | VCV000013484 | 12               | 4911929        | 13484       | 28523       | rs104894357  | LOF        | 0.917    | 0.021        | 0.061    |
| KCNA1 | 187 | E   | K   | NM_000217.3(KCNA1):c.559G>A (p.Glu187Lys) | Episodic ataxia type 1                         | Uncertain significance(Last reviewed: Mar 12, 2018)                       | criteria provided, single submitter                  | VCV000573452 | 12               | 4911937        | 573452      | 565532      | rs1565433190 | LOF        | 0.911    | 0.02         | 0.069    |
| KCNA1 | 195 | D   | E   | NM_000217.3(KCNA1):c.585C>G (p.Asp195Glu) | Episodic ataxia type 1                         | Uncertain significance(Last reviewed: Mar 7, 2020)                        | criteria provided, single submitter                  | VCV000855826 | 12               | 4911963        | 855826      | 839994      | rs1947354740 | LOF        | 0.76     | 0.105        | 0.135    |
| KCNA1 | 199 | T   | M   | NM_000217.3(KCNA1):c.596C>T (p.Thr199Met) | Episodic ataxia type 1                         | Uncertain significance(Last reviewed: Sep 20, 2020)                       | criteria provided, single submitter                  | VCV000835844 | 12               | 4911974        | 835844      | 839995      | rs1207573200 | Neutral    | 0.638    | 0.205        | 0.156    |
| KCNA1 | 200 | G   | A   | NM_000217.3(KCNA1):c.599G>C (p.Gly200Ala) | Episodic ataxia type 1                         | Uncertain significance(Last reviewed: Dec 4, 2017)                        | criteria provided, single submitter                  | VCV000532541 | 12               | 4911977        | 532541      | 527204      | rs1411072418 | Neutral    | 0.698    | 0.17         | 0.132    |
| KCNA1 | 204 | R   | H   | NM_000217.3(KCNA1):c.611G>A (p.Arg204His) | Episodic ataxia type 1 not provided            | Conflicting interpretations of pathogenicity(Last reviewed: Sep 10, 2020) | criteria provided, conflicting                       | VCV000290682 | 12               | 4911989        | 290682      | 274919      | rs2229000    | LOF        | 0.794    | 0.12         | 0.086    |

| gene  | pos | aa1 | aa2 | Name                                      | Condition(s)                                                          | Clinical significance (Last reviewed)               | Review status                                        | Accession    | GRCh38Chromosome | GRCh38Location | VariationID | AlleleID(s) | dbSNP ID     | prediction | prob.LOF | prob.Neutral | prob.GOF |
|-------|-----|-----|-----|-------------------------------------------|-----------------------------------------------------------------------|-----------------------------------------------------|------------------------------------------------------|--------------|------------------|----------------|-------------|-------------|--------------|------------|----------|--------------|----------|
|       |     |     |     |                                           |                                                                       | reviewed: Dec 3, 2020)                              | interpretations                                      |              |                  |                |             |             |              |            |          |              |          |
| KCNA1 | 214 | S   | F   | NM_000217.3(KCNA1):c.641C>T (p.Ser214Phe) | Episodic ataxia type 1                                                | Uncertain significance(Last reviewed: Jan 21, 2020) | criteria provided, single submitter                  | VCV000998939 | 12               | 4912019        | 998939      | 995243      | rs764561596  | LOF        | 0.728    | 0.122        | 0.15     |
| KCNA1 | 215 | N   | I   | NM_000217.3(KCNA1):c.644A>T (p.Asn215Ile) | Episodic ataxia type 1                                                | Uncertain significance(Last reviewed: Jul 20, 2020) | criteria provided, single submitter                  | VCV001017234 | 12               | 4912022        | 1017234     | 1010475     | rs762016621  | LOF        | 0.734    | 0.116        | 0.15     |
| KCNA1 | 218 | T   | R   | NM_000217.3(KCNA1):c.653C>G (p.Thr218Arg) | Episodic ataxia type 1                                                | Uncertain significance(Last reviewed: Jun 29, 2020) | criteria provided, single submitter                  | VCV000955267 | 12               | 4912031        | 955267      | 948054      | rs1280516411 | LOF        | 0.81     | 0.05         | 0.14     |
| KCNA1 | 223 | I   | V   | NM_000217.3(KCNA1):c.667A>G (p.Ile223Val) | Episodic ataxia type 1                                                | Uncertain significance(Last reviewed: May 20, 2020) | criteria provided, single submitter                  | VCV001006491 | 12               | 4912045        | 1006491     | 995244      | rs146948558  | LOF        | 0.849    | 0.045        | 0.106    |
| KCNA1 | 224 | V   | L   | NM_000217.3(KCNA1):c.670G>T (p.Val224Leu) | Episodic ataxia type 1                                                | Uncertain significance(Last reviewed: Sep 11, 2020) | criteria provided, single submitter                  | VCV001043157 | 12               | 4912048        | 1043157     | 1030984     | rs1947355480 | LOF        | 0.846    | 0.041        | 0.113    |
| KCNA1 | 226 | T   | A   | NM_000217.3(KCNA1):c.676A>G (p.Thr226Ala) | Episodic ataxia type 1                                                | Pathogenic(Last reviewed: Aug 16, 2012)             | no assertion criteria provided                       | VCV000013486 | 12               | 4912054        | 13486       | 28525       | rs104894354  | LOF        | 0.882    | 0.032        | 0.085    |
| KCNA1 | 226 | T   | K   | NM_000217.3(KCNA1):c.677C>A (p.Thr226Lys) | Myokymia 1                                                            | Pathogenic(Last reviewed: Apr 1, 2007)              | no assertion criteria provided                       | VCV000013493 | 12               | 4912055        | 13493       | 28532       | rs28933383   | LOF        | 0.909    | 0.02         | 0.071    |
| KCNA1 | 226 | T   | M   | NM_000217.3(KCNA1):c.677C>T (p.Thr226Met) | Episodic ataxia type 1                                                | Pathogenic(Last reviewed: Aug 16, 2012)             | no assertion criteria provided                       | VCV000021127 | 12               | 4912055        | 21127       | 33979       | rs28933383   | LOF        | 0.891    | 0.028        | 0.082    |
| KCNA1 | 226 | T   | R   | NM_000217.3(KCNA1):c.677C>G (p.Thr226Arg) | not provided Episodic ataxia/myokymia syndrome Episodic ataxia type 1 | Pathogenic(Last reviewed: Nov 16, 2021)             | criteria provided, multiple submitters, no conflicts | VCV000013492 | 12               | 4912055        | 13492       | 28531       | rs28933383   | LOF        | 0.912    | 0.019        | 0.069    |
| KCNA1 | 234 | F   | L   | NM_000217.3(KCNA1):c.702C>A (p.Phe234Leu) | not provided                                                          | Uncertain significance(Last reviewed: Jun 4, 2021)  | criteria provided, single submitter                  | VCV001317352 | 12               | 4912080        | 1317352     | 1306296     | NA           | LOF        | 0.865    | 0.041        | 0.093    |
| KCNA1 | 239 | R   | S   | NM_000217.3(KCNA1):c.715C>A (p.Arg239Ser) | Episodic ataxia type 1                                                | Pathogenic(Last reviewed: Dec 1, 1995)              | no assertion criteria provided                       | VCV000013481 | 12               | 4912093        | 13481       | 28520       | rs104894348  | LOF        | 0.916    | 0.02         | 0.064    |
| KCNA1 | 242 | A   | P   | NM_000217.3(KCNA1):c.724G>C (p.Ala242Pro) | not provided Myokymia 1                                               | Pathogenic(Last reviewed: Oct 14, 2016)             | criteria provided, single submitter                  | VCV000013489 | 12               | 4912102        | 13489       | 28528       | rs28933381   | LOF        | 0.877    | 0.06         | 0.063    |
| KCNA1 | 244 | P   | H   | NM_000217.3(KCNA1):c.731C>A (p.Pro244His) | Myokymia 1                                                            | Pathogenic(Last reviewed: Oct 1, 2000)              | no assertion criteria provided                       | VCV000013490 | 12               | 4912109        | 13490       | 28529       | rs28933382   | Neutral    | 0.485    | 0.403        | 0.111    |
| KCNA1 | 249 | F   | I   | NM_000217.3(KCNA1):c.745T>A (p.Phe249Ile) | Episodic ataxia type 1                                                | Pathogenic(Last reviewed: Dec 1, 1995)              | no assertion criteria provided                       | VCV000013483 | 12               | 4912123        | 13483       | 28522       | rs104894356  | LOF        | 0.855    | 0.046        | 0.099    |
| KCNA1 | 253 | I   | F   | NM_000217.3(KCNA1):c.757A>T (p.Ile253Phe) | Episodic ataxia type 1                                                | Uncertain significance(Last reviewed: Sep 17, 2019) | criteria provided, single submitter                  | VCV000955199 | 12               | 4912135        | 955199      | 948056      | rs1947356316 | LOF        | 0.853    | 0.029        | 0.118    |
| KCNA1 | 253 | I   | V   | NM_000217.3(KCNA1):c.757A>G (p.Ile253Val) | Episodic ataxia type 1                                                | Uncertain significance(Last reviewed: Sep 19, 2019) | criteria provided, single submitter                  | VCV000964532 | 12               | 4912135        | 964532      | 948055      | rs1947356316 | LOF        | 0.807    | 0.042        | 0.152    |

| gene  | pos | aa1 | aa2 | Name                                      | Condition(s)                        | Clinical significance (Last reviewed)               | Review status                                        | Accession    | GRCh38Chromosome | GRCh38Location | VariationID | AlleleID(s) | dbSNP ID     | prediction | prob.LOF | prob.Neutral | prob.GOF |
|-------|-----|-----|-----|-------------------------------------------|-------------------------------------|-----------------------------------------------------|------------------------------------------------------|--------------|------------------|----------------|-------------|-------------|--------------|------------|----------|--------------|----------|
| KCNA1 | 255 | N   | D   | NM_000217.3(KCNA1):c.763A>G (p.Asn255Asp) | Myokymia 1 with hypomagnesemia      | Pathogenic(Last reviewed: Jan 1, 2010)              | no assertion criteria provided                       | VCV000013494 | 12               | 4912141        | 13494       | 28533       | rs121918067  | LOF        | 0.905    | 0.023        | 0.071    |
| KCNA1 | 265 | Y   | C   | NM_000217.3(KCNA1):c.794A>G (p.Tyr265Cys) | Episodic ataxia type 1              | Uncertain significance(Last reviewed: Mar 20, 2020) | criteria provided, single submitter                  | VCV000846128 | 12               | 4912172        | 846128      | 839996      | rs1947356506 | LOF        | 0.927    | 0.021        | 0.052    |
| KCNA1 | 268 | T   | K   | NM_000217.3(KCNA1):c.803C>A (p.Thr268Lys) | not provided                        | Uncertain significance(Last reviewed: Sep 16, 2018) | no assertion criteria provided                       | VCV000591423 | 12               | 4912181        | 591423      | 582414      | rs1565433356 | LOF        | 0.909    | 0.021        | 0.07     |
| KCNA1 | 279 | N   | K   | NM_000217.3(KCNA1):c.837C>A (p.Asn279Lys) | not provided                        | Uncertain significance(Last reviewed: Dec 31, 2018) | criteria provided, single submitter                  | VCV000804964 | 12               | 4912215        | 804964      | 793435      | rs1591627786 | Neutral    | 0.668    | 0.178        | 0.154    |
| KCNA1 | 291 | L   | H   | NM_000217.3(KCNA1):c.872T>A (p.Leu291His) | not provided                        | Uncertain significance(Last reviewed: Mar 21, 2017) | criteria provided, single submitter                  | VCV000424183 | 12               | 4912250        | 424183      | 408684      | rs1064796844 | LOF        | 0.927    | 0.01         | 0.063    |
| KCNA1 | 295 | R   | H   | NM_000217.3(KCNA1):c.884G>A (p.Arg295His) | not provided                        | Uncertain significance(Last reviewed: Sep 11, 2017) | criteria provided, single submitter                  | VCV000586092 | 12               | 4912262        | 586092      | 577274      | rs778463081  | LOF        | 0.905    | 0.017        | 0.078    |
| KCNA1 | 296 | L   | F   | NM_000217.3(KCNA1):c.888G>T (p.Leu296Phe) | Episodic ataxia type 1              | Uncertain significance(Last reviewed: Dec 5, 2020)  | criteria provided, single submitter                  | VCV001029721 | 12               | 4912266        | 1029721     | 1017632     | rs1315748120 | LOF        | 0.835    | 0.023        | 0.142    |
| KCNA1 | 296 | L   | F   | NM_000217.3(KCNA1):c.888G>T (p.Leu296Phe) | Episodic ataxia type 1              | Uncertain significance(Last reviewed: Dec 5, 2020)  | criteria provided, single submitter                  | VCV001029721 | 12               | 4912266        | 1029721     | 1017632     | rs1315748120 | LOF        | 0.835    | 0.023        | 0.142    |
| KCNA1 | 296 | L   | F   | NM_000217.3(KCNA1):c.888G>C (p.Leu296Phe) | Episodic ataxia type 1              | Uncertain significance(Last reviewed: Nov 13, 2019) | criteria provided, single submitter                  | VCV000966172 | 12               | 4912266        | 966172      | 956895      | rs1315748120 | LOF        | 0.835    | 0.023        | 0.142    |
| KCNA1 | 296 | L   | F   | NM_000217.3(KCNA1):c.888G>C (p.Leu296Phe) | Episodic ataxia type 1              | Uncertain significance(Last reviewed: Nov 13, 2019) | criteria provided, single submitter                  | VCV000966172 | 12               | 4912266        | 966172      | 956895      | rs1315748120 | LOF        | 0.835    | 0.023        | 0.142    |
| KCNA1 | 298 | R   | T   | NM_000217.3(KCNA1):c.893G>C (p.Arg298Thr) | not provided                        | Uncertain significance(Last reviewed: Jun 1, 2021)  | criteria provided, single submitter                  | VCV001176598 | 12               | 4912271        | 1176598     | 1166054     | NA           | LOF        | 0.914    | 0.021        | 0.066    |
| KCNA1 | 305 | L   | F   | NM_000217.3(KCNA1):c.913C>T (p.Leu305Phe) | not provided Episodic ataxia type 1 | Likely pathogenic(Last reviewed: Oct 2, 2021)       | criteria provided, multiple submitters, no conflicts | VCV000447614 | 12               | 4912291        | 447614      | 441556      | rs1555085761 | LOF        | 0.869    | 0.035        | 0.096    |
| KCNA1 | 306 | S   | C   | NM_000217.3(KCNA1):c.917C>G (p.Ser306Cys) | Episodic ataxia type 1              | Uncertain significance(Last reviewed: Jul 27, 2020) | criteria provided, single submitter                  | VCV001009332 | 12               | 4912295        | 1009332     | 995246      | rs1947357313 | LOF        | 0.891    | 0.046        | 0.062    |
| KCNA1 | 311 | G   | C   | NM_000217.3(KCNA1):c.931G>T (p.Gly311Cys) | Episodic ataxia type 1              | Uncertain significance(Last reviewed: Aug 28, 2019) | criteria provided, single submitter                  | VCV000957833 | 12               | 4912309        | 957833      | 948057      | rs1947357459 | Neutral    | 0.728    | 0.185        | 0.086    |
| KCNA1 | 312 | L   | I   | NM_000217.3(KCNA1):c.934C>A (p.Leu312Ile) | Episodic ataxia type 1              | Uncertain significance(Last reviewed: Nov 18, 2019) | criteria provided, single submitter                  | VCV000834847 | 12               | 4912312        | 834847      | 839997      | rs1947357501 | Neutral    | 0.656    | 0.226        | 0.117    |
| KCNA1 | 314 | I   | T   | NM_000217.3(KCNA1):c.941T>C (p.Ile314Thr) | not provided Episodic ataxia type 1 | Likely                                              | criteria                                             | VCV000427198 | 12               | 4912319        | 427198      | 415337      | rs1085308020 | LOF        | 0.795    | 0.118        | 0.087    |

| gene  | pos | aa1 | aa2 | Name                                       | Condition(s)                                                                  | Clinical significance (Last reviewed)                     | Review status                                        | Accession    | GRCh38Chromosome | GRCh38Location | VariationID | AlleleID(s) | dbSNP ID     | prediction | prob.LOF | prob.Neutral | prob.GOF |
|-------|-----|-----|-----|--------------------------------------------|-------------------------------------------------------------------------------|-----------------------------------------------------------|------------------------------------------------------|--------------|------------------|----------------|-------------|-------------|--------------|------------|----------|--------------|----------|
|       |     |     |     |                                            |                                                                               | pathogenic(Last reviewed: Jul 26, 2018)                   | provided, multiple submitters, no conflicts          |              |                  |                |             |             |              |            |          |              |          |
| KCNA1 | 322 | S   | R   | NM_000217.3(KCNA1):c.964A>C (p.Ser322Arg)  | Episodic ataxia type 1                                                        | Uncertain significance(Last reviewed: May 3, 2018)        | criteria provided, single submitter                  | VCV000577805 | 12               | 4912342        | 577805      | 571880      | rs1565433425 | LOF        | 0.782    | 0.125        | 0.094    |
| KCNA1 | 325 | E   | D   | NM_000217.3(KCNA1):c.975G>C (p.Glu325Asp)  | Episodic ataxia type 1                                                        | Pathogenic(Last reviewed: Dec 1, 1995)                    | no assertion criteria provided                       | VCV000013485 | 12               | 4912353        | 13485       | 28524       | rs104894353  | LOF        | 0.897    | 0.034        | 0.069    |
| KCNA1 | 331 | F   | C   | NM_000217.3(KCNA1):c.992T>G (p.Phe331Cys)  | Episodic ataxia type 1                                                        | Uncertain significance(Last reviewed: Jan 29, 2020)       | criteria provided, single submitter                  | VCV001042632 | 12               | 4912370        | 1042632     | 1030985     | rs1947357713 | LOF        | 0.91     | 0.015        | 0.075    |
| KCNA1 | 332 | F   | S   | NM_000217.3(KCNA1):c.995T>C (p.Phe332Ser)  | Episodic ataxia type 1                                                        | Uncertain significance(Last reviewed: Oct 21, 2020)       | criteria provided, single submitter                  | VCV001052052 | 12               | 4912373        | 1052052     | 1047989     | NA           | LOF        | 0.917    | 0.013        | 0.07     |
| KCNA1 | 352 | A   | P   | NM_000217.3(KCNA1):c.1054G>C (p.Ala352Pro) | not provided                                                                  | Uncertain significance(Last reviewed: Jul 1, 2016)        | criteria provided, single submitter                  | VCV000374743 | 12               | 4912432        | 374743      | 361629      | rs1057519226 | LOF        | 0.733    | 0.139        | 0.128    |
| KCNA1 | 365 | W   | R   | NM_000217.3(KCNA1):c.1093T>C (p.Trp365Arg) | Episodic ataxia type 1                                                        | Uncertain significance(Last reviewed: Apr 29, 2020)       | criteria provided, single submitter                  | VCV001060322 | 12               | 4912471        | 1060322     | 1047990     | NA           | LOF        | 0.943    | 0.011        | 0.046    |
| KCNA1 | 376 | G   | R   | NM_000217.3(KCNA1):c.1126G>C (p.Gly376Arg) | not provided Episodic ataxia type 1                                           | Uncertain significance(Last reviewed: Oct 31, 2017)       | criteria provided, single submitter                  | VCV000453118 | 12               | 4912504        | 453118      | 445033      | rs1555085786 | LOF        | 0.897    | 0.038        | 0.065    |
| KCNA1 | 384 | G   | R   | NM_000217.3(KCNA1):c.1150G>A (p.Gly384Arg) | Episodic ataxia type 1                                                        | Uncertain significance(Last reviewed: May 15, 2019)       | criteria provided, single submitter                  | VCV000863534 | 12               | 4912528        | 863534      | 839998      | rs1947358468 | LOF        | 0.899    | 0.03         | 0.071    |
| KCNA1 | 395 | A   | S   | NM_000217.3(KCNA1):c.1183G>T (p.Ala395Ser) | Episodic ataxia type 1                                                        | Likely pathogenic(Last reviewed: Mar 14, 2017)            | criteria provided, single submitter                  | VCV000431378 | 12               | 4912561        | 431378      | 424900      | rs1135401950 | LOF        | 0.882    | 0.02         | 0.097    |
| KCNA1 | 396 | G   | R   | NM_000217.3(KCNA1):c.1186G>C (p.Gly396Arg) | Paroxysmal nonkinesigenic dyskinesia, 3, with or without generalized epilepsy | Likely pathogenic(Last reviewed: May 19, 2021)            | criteria provided, single submitter                  | VCV001098715 | 12               | 4912564        | 1098715     | 1087424     | NA           | LOF        | 0.933    | 0.014        | 0.053    |
| KCNA1 | 396 | G   | V   | NM_000217.3(KCNA1):c.1187G>T (p.Gly396Val) | Episodic kinesigenic dyskinesia                                               | Likely pathogenic(Last reviewed: May 19, 2021)            | criteria provided, single submitter                  | VCV001098714 | 12               | 4912565        | 1098714     | 1087425     | NA           | LOF        | 0.911    | 0.024        | 0.065    |
| KCNA1 | 401 | A   | V   | NM_000217.3(KCNA1):c.1202C>T (p.Ala401Val) | Inborn genetic diseases not provided                                          | Pathogenic/Likely pathogenic(Last reviewed: Aug 16, 2019) | criteria provided, multiple submitters, no conflicts | VCV000208748 | 12               | 4912580        | 208748      | 205276      | rs797044929  | LOF        | 0.801    | 0.027        | 0.172    |
| KCNA1 | 403 | P   | T   | NM_000217.3(KCNA1):c.1207C>A (p.Pro403Thr) | Episodic ataxia type 1                                                        | Uncertain significance(Last reviewed: Aug 1, 2018)        | criteria provided, single submitter                  | VCV000644532 | 12               | 4912585        | 644532      | 641184      | rs1591627924 | LOF        | 0.908    | 0.027        | 0.065    |
| KCNA1 | 404 | V   | I   | NM_000217.3(KCNA1):c.1210G>A (p.Val404Ile) | Episodic ataxia type 1                                                        | Pathogenic(Last reviewed: Oct 1, 2000)                    | no assertion criteria provided                       | VCV000013487 | 12               | 4912588        | 13487       | 28526       | rs104894355  | LOF        | 0.853    | 0.046        | 0.101    |
| KCNA1 | 405 | P   | A   | NM_000217.3(KCNA1):c.1213C>G (p.Pro405Ala) | Inborn genetic diseases                                                       | Likely pathogenic(Last reviewed: Jan 30,                  | criteria provided, single submitter                  | VCV000985808 | 12               | 4912591        | 985808      | 973859      | rs1947358808 | LOF        | 0.901    | 0.032        | 0.066    |



| gene  | pos | aa1 | aa2 | Name                                       | Condition(s)                                      | Clinical significance (Last reviewed)               | Review status                                        | Accession    | GRCh38Chromosome | GRCh38Location | VariationID | AlleleID(s) | dbSNP ID     | prediction | prob.LOF | prob.Neutral | prob.GOF |
|-------|-----|-----|-----|--------------------------------------------|---------------------------------------------------|-----------------------------------------------------|------------------------------------------------------|--------------|------------------|----------------|-------------|-------------|--------------|------------|----------|--------------|----------|
|       |     |     |     |                                            |                                                   |                                                     |                                                      |              |                  |                |             |             |              |            |          |              |          |
| KCNA1 | 405 | P   | L   | NM_000217.3(KCNA1):c.1214C>T (p.Pro405Leu) | not provided                                      | Pathogenic(Last reviewed: Dec 22, 2016)             | criteria provided, single submitter                  | VCV000447609 | 12               | 4912592        | 447609      | 441557      | rs1555085798 | LOF        | 0.896    | 0.036        | 0.068    |
| KCNA1 | 408 | V   | A   | NM_000217.3(KCNA1):c.1223T>C (p.Val408Ala) | Episodic ataxia type 1                            | Pathogenic(Last reviewed: Jun 25, 2015)             | no assertion criteria provided                       | VCV000013480 | 12               | 4912601        | 13480       | 28519       | rs104894352  | LOF        | 0.859    | 0.02         | 0.121    |
| KCNA1 | 408 | V   | M   | NM_000217.3(KCNA1):c.1222G>A (p.Val408Met) | not provided                                      | Uncertain significance(Last reviewed: Jul 24, 2015) | criteria provided, single submitter                  | VCV000282028 | 12               | 4912600        | 282028      | 266265      | rs113994117  | LOF        | 0.844    | 0.023        | 0.133    |
| KCNA1 | 429 | H   | Q   | NM_000217.3(KCNA1):c.1287C>G (p.His429Gln) | Episodic ataxia type 1                            | Uncertain significance(Last reviewed: Jun 17, 2020) | criteria provided, single submitter                  | VCV001059224 | 12               | 4912665        | 1059224     | 1047991     | NA           | Neutral    | 0.653    | 0.207        | 0.14     |
| KCNA1 | 430 | V   | L   | NM_000217.3(KCNA1):c.1288G>C (p.Val430Leu) | Episodic ataxia type 1                            | Uncertain significance(Last reviewed: Mar 26, 2020) | criteria provided, single submitter                  | VCV001058791 | 12               | 4912666        | 1058791     | 1047992     | NA           | Neutral    | 0.558    | 0.312        | 0.13     |
| KCNA1 | 442 | S   | T   | NM_000217.3(KCNA1):c.1325G>C (p.Ser442Thr) | Episodic ataxia type 1                            | Uncertain significance(Last reviewed: Sep 8, 2019)  | criteria provided, single submitter                  | VCV000934436 | 12               | 4912703        | 934436      | 936147      | rs1947359738 | Neutral    | 0.57     | 0.27         | 0.159    |
| KCNA1 | 443 | R   | G   | NM_000217.3(KCNA1):c.1327C>G (p.Arg443Gly) | not specified Episodic ataxia type 1 not provided | Benign/Likely benign(Last reviewed: Oct 29, 2020)   | criteria provided, multiple submitters, no conflicts | VCV000195042 | 12               | 4912705        | 195042      | 192204      | rs150849316  | Neutral    | 0.615    | 0.261        | 0.124    |
| KCNA1 | 443 | R   | H   | NM_000217.3(KCNA1):c.1328G>A (p.Arg443His) | Episodic ataxia type 1                            | Uncertain significance(Last reviewed: May 21, 2020) | criteria provided, single submitter                  | VCV001056962 | 12               | 4912706        | 1056962     | 1047993     | NA           | Neutral    | 0.557    | 0.306        | 0.138    |
| KCNA1 | 449 | M   | T   | NM_000217.3(KCNA1):c.1346T>C (p.Met449Thr) | not provided                                      | Uncertain significance(Last reviewed: May 1, 2018)  | criteria provided, single submitter                  | VCV000586089 | 12               | 4912724        | 586089      | 577276      | rs1481224137 | Neutral    | 0.637    | 0.236        | 0.127    |
| KCNA1 | 455 | M   | I   | NM_000217.3(KCNA1):c.1365G>T (p.Met455Ile) | not provided                                      | Uncertain significance(Last reviewed: Jan 24, 2020) | criteria provided, single submitter                  | VCV001195360 | 12               | 4912743        | 1195360     | 1184716     | NA           | Neutral    | 0.566    | 0.325        | 0.109    |
| KCNA1 | 455 | M   | K   | NM_000217.3(KCNA1):c.1364T>A (p.Met455Lys) | Episodic ataxialMyokymia                          | Uncertain significance(Last reviewed: Jun 14, 2016) | criteria provided, single submitter                  | VCV000309147 | 12               | 4912742        | 309147      | 331464      | rs886049512  | Neutral    | 0.721    | 0.172        | 0.107    |
| KCNA1 | 455 | M   | V   | NM_000217.3(KCNA1):c.1363A>G (p.Met455Val) | Episodic ataxia type 1                            | Uncertain significance(Last reviewed: Aug 15, 2020) | criteria provided, single submitter                  | VCV001021989 | 12               | 4912741        | 1021989     | 1010476     | rs1173585397 | Neutral    | 0.579    | 0.312        | 0.109    |
| KCNA1 | 460 | D   | Y   | NM_000217.3(KCNA1):c.1378G>T (p.Asp460Tyr) | Episodic ataxia type 1                            | Uncertain significance(Last reviewed: Feb 14, 2020) | criteria provided, single submitter                  | VCV001055177 | 12               | 4912756        | 1055177     | 1047994     | NA           | Neutral    | 0.599    | 0.281        | 0.119    |
| KCNA1 | 461 | M   | T   | NM_000217.3(KCNA1):c.1382T>C (p.Met461Thr) | Episodic ataxia type 1                            | Uncertain significance(Last reviewed: Apr 8, 2020)  | criteria provided, single submitter                  | VCV001039751 | 12               | 4912760        | 1039751     | 1030986     | rs767068909  | Neutral    | 0.688    | 0.214        | 0.097    |
| KCNA1 | 466 | A   | D   | NM_000217.3(KCNA1):c.1397C>A (p.Ala466Asp) | Episodic ataxia type 1                            | Uncertain significance(Last reviewed: Dec 18, 2018) | criteria provided, single submitter                  | VCV000642349 | 12               | 4912775        | 642349      | 641185      | rs1303950325 | LOF        | 0.733    | 0.163        | 0.104    |

| gene  | pos | aa1 | aa2 | Name                                       | Condition(s)                                               | Clinical significance (Last reviewed)                                     | Review status                                        | Accession    | GRCh38Chromosome | GRCh38Location | VariationID | AlleleID(s) | dbSNP ID     | prediction | prob.LOF | prob.Neutral | prob.GOF |
|-------|-----|-----|-----|--------------------------------------------|------------------------------------------------------------|---------------------------------------------------------------------------|------------------------------------------------------|--------------|------------------|----------------|-------------|-------------|--------------|------------|----------|--------------|----------|
| KCNA1 | 472 | N   | S   | NM_000217.3(KCNA1):c.1415A>G (p.Asn472Ser) | Episodic ataxia type 1                                     | Uncertain significance(Last reviewed: Dec 11, 2019)                       | criteria provided, single submitter                  | VCV000849888 | 12               | 4912793        | 849888      | 839999      | rs150612442  | Neutral    | 0.595    | 0.25         | 0.155    |
| KCNA1 | 481 | A   | V   | NM_000217.3(KCNA1):c.1442C>T (p.Ala481Val) | Episodic ataxia type 1                                     | Uncertain significance(Last reviewed: Feb 17, 2020)                       | criteria provided, single submitter                  | VCV001052029 | 12               | 4912820        | 1052029     | 1047995     | NA           | Neutral    | 0.555    | 0.308        | 0.136    |
| KCNA1 | 483 | Q   | H   | NM_000217.3(KCNA1):c.1449A>T (p.Gln483His) | not provided Episodic ataxia type 1                        | Uncertain significance(Last reviewed: Aug 11, 2019)                       | criteria provided, multiple submitters, no conflicts | VCV000586090 | 12               | 4912827        | 586090      | 577277      | rs372539672  | Neutral    | 0.569    | 0.289        | 0.142    |
| KCNA1 | 485 | C   | S   | NM_000217.3(KCNA1):c.1453T>A (p.Cys485Ser) | Episodic ataxia type 1                                     | Uncertain significance(Last reviewed: May 25, 2019)                       | criteria provided, single submitter                  | VCV000949579 | 12               | 4912831        | 949579      | 926656      | rs1470787858 | Neutral    | 0.681    | 0.2          | 0.119    |
| KCNA1 | 486 | V   | I   | NM_000217.3(KCNA1):c.1456G>A (p.Val486Ile) | Episodic ataxia type 1                                     | Uncertain significance(Last reviewed: Oct 6, 2020)                        | criteria provided, single submitter                  | VCV001061129 | 12               | 4912834        | 1061129     | 1047996     | NA           | Neutral    | 0.58     | 0.299        | 0.121    |
| KCNA1 | 489 | S   | N   | NM_000217.3(KCNA1):c.1466G>A (p.Ser489Asn) | not provided                                               | Uncertain significance(Last reviewed: May 5, 2017)                        | criteria provided, single submitter                  | VCV000430064 | 12               | 4912844        | 430064      | 421928      | rs1131691765 | Neutral    | 0.653    | 0.207        | 0.14     |
| KCNA2 | 8   | P   | L   | NM_004974.4(KCNA2):c.23C>T (p.Pro8Leu)     | Epileptic encephalopathy, early infantile, 32              | Uncertain significance(Last reviewed: Feb 2, 2020)                        | criteria provided, single submitter                  | VCV001008882 | 1                | 110604760      | 1008882     | 986803      | rs1487522107 | Neutral    | 0.588    | 0.237        | 0.175    |
| KCNA2 | 12  | A   | V   | NM_004974.4(KCNA2):c.35C>T (p.Ala12Val)    | not provided Epileptic encephalopathy, early infantile, 32 | Conflicting interpretations of pathogenicity(Last reviewed: May 25, 2021) | criteria provided, conflicting interpretations       | VCV000663661 | 1                | 110604748      | 663661      | 626578      | rs372822052  | Neutral    | 0.585    | 0.23         | 0.185    |
| KCNA2 | 15  | L   | V   | NM_004974.4(KCNA2):c.43C>G (p.Leu15Val)    | Epileptic encephalopathy, early infantile, 32              | Uncertain significance(Last reviewed: Jul 25, 2020)                       | criteria provided, single submitter                  | VCV001020683 | 1                | 110604740      | 1020683     | 1002022     | rs1649522982 | Neutral    | 0.66     | 0.203        | 0.138    |
| KCNA2 | 16  | P   | R   | NM_004974.4(KCNA2):c.47C>G (p.Pro16Arg)    | Epileptic encephalopathy, early infantile, 32              | Uncertain significance(Last reviewed: May 4, 2019)                        | criteria provided, single submitter                  | VCV000952381 | 1                | 110604736      | 952381      | 921567      | rs1649522718 | Neutral    | 0.55     | 0.257        | 0.193    |
| KCNA2 | 16  | P   | S   | NM_004974.4(KCNA2):c.46C>T (p.Pro16Ser)    | Epileptic encephalopathy, early infantile, 32              | Uncertain significance(Last reviewed: Oct 30, 2018)                       | criteria provided, single submitter                  | VCV000663887 | 1                | 110604737      | 663887      | 626577      | rs1570754155 | Neutral    | 0.549    | 0.26         | 0.192    |
| KCNA2 | 23  | Y   | C   | NM_004974.4(KCNA2):c.68A>G (p.Tyr23Cys)    | Epileptic encephalopathy, early infantile, 32              | Uncertain significance(Last reviewed: Oct 25, 2018)                       | criteria provided, single submitter                  | VCV000476053 | 1                | 110604715      | 476053      | 447049      | rs753829876  | Neutral    | 0.663    | 0.203        | 0.134    |
| KCNA2 | 27  | A   | T   | NM_004974.4(KCNA2):c.79G>A (p.Ala27Thr)    | Epileptic encephalopathy, early infantile, 32              | Likely benign(Last reviewed: Nov 6, 2019)                                 | criteria provided, single submitter                  | VCV001087753 | 1                | 110604704      | 1087753     | 1066022     | NA           | Neutral    | 0.543    | 0.235        | 0.221    |
| KCNA2 | 43  | R   | W   | NM_004974.4(KCNA2):c.127C>T (p.Arg43Trp)   | not provided                                               | Uncertain significance(Last reviewed: Feb 6, 2020)                        | criteria provided, single submitter                  | VCV001304041 | 1                | 110604656      | 1304041     | 1294316     | NA           | LOF        | 0.818    | 0.094        | 0.088    |
| KCNA2 | 57  | T   | I   | NM_004974.4(KCNA2):c.170C>T (p.Thr57Ile)   | Epileptic encephalopathy, early infantile, 32              | Uncertain significance(Last reviewed: Sep 27, 2019)                       | criteria provided, single submitter                  | VCV000962503 | 1                | 110604613      | 962503      | 941369      | rs1649517174 | GOF        | 0.606    | 0.1          | 0.294    |

| gene  | pos | aa1 | aa2 | Name                                      | Condition(s)                                                | Clinical significance (Last reviewed)               | Review status                                        | Accession    | GRCh38Chromosome | GRCh38Location | VariationID | AlleleID(s) | dbSNP ID     | prediction | prob.LOF | prob.Neutral | prob.GOF |
|-------|-----|-----|-----|-------------------------------------------|-------------------------------------------------------------|-----------------------------------------------------|------------------------------------------------------|--------------|------------------|----------------|-------------|-------------|--------------|------------|----------|--------------|----------|
| KCNA2 | 65  | R   | Q   | NM_004974.4(KCNA2):c.194G>A (p.Arg65Gln)  | Epileptic encephalopathy, early infantile, 32(not provided) | Uncertain significance(Last reviewed: Oct 27, 2020) | criteria provided, multiple submitters, no conflicts | VCV001006374 | 1                | 110604589      | 1006374     | 986802      | rs1649516324 | LOF        | 0.731    | 0.154        | 0.114    |
| KCNA2 | 73  | R   | Q   | NM_004974.4(KCNA2):c.218G>A (p.Arg73Gln)  | Epileptic encephalopathy, early infantile, 32               | Uncertain significance(Last reviewed: Apr 25, 2019) | criteria provided, single submitter                  | VCV000581262 | 1                | 110604565      | 581262      | 556838      | rs373042266  | GOF        | 0.52     | 0.093        | 0.388    |
| KCNA2 | 79  | D   | N   | NM_004974.4(KCNA2):c.235G>A (p.Asp79Asn)  | Epileptic encephalopathy, early infantile, 32               | Uncertain significance(Last reviewed: Apr 28, 2019) | criteria provided, single submitter                  | VCV000951627 | 1                | 110604548      | 951627      | 921566      | rs747844549  | GOF        | 0.573    | 0.079        | 0.348    |
| KCNA2 | 79  | D   | Y   | NM_004974.4(KCNA2):c.235G>T (p.Asp79Tyr)  | Epileptic encephalopathy, early infantile, 32(not provided) | Uncertain significance(Last reviewed: Mar 10, 2020) | criteria provided, multiple submitters, no conflicts | VCV001036616 | 1                | 110604548      | 1036616     | 1022530     | rs747844549  | GOF        | 0.578    | 0.077        | 0.344    |
| KCNA2 | 80  | R   | Q   | NM_004974.4(KCNA2):c.239G>A (p.Arg80Gln)  | Epileptic encephalopathy, early infantile, 32               | Uncertain significance(Last reviewed: Dec 27, 2019) | criteria provided, single submitter                  | VCV000852778 | 1                | 110604544      | 852778      | 822501      | rs1649513909 | GOF        | 0.547    | 0.085        | 0.368    |
| KCNA2 | 80  | R   | W   | NM_004974.4(KCNA2):c.238C>T (p.Arg80Trp)  | Epileptic encephalopathy, early infantile, 32               | Uncertain significance(Last reviewed: Mar 26, 2018) | criteria provided, single submitter                  | VCV000581223 | 1                | 110604545      | 581223      | 556836      | rs1448937059 | GOF        | 0.628    | 0.096        | 0.276    |
| KCNA2 | 82  | R   | C   | NM_004974.4(KCNA2):c.244C>T (p.Arg82Cys)  | Epileptic encephalopathy, early infantile, 32               | Uncertain significance(Last reviewed: Oct 30, 2017) | criteria provided, single submitter                  | VCV000542665 | 1                | 110604539      | 542665      | 515007      | rs1433727837 | GOF        | 0.672    | 0.065        | 0.262    |
| KCNA2 | 97  | R   | Q   | NM_004974.4(KCNA2):c.290G>A (p.Arg97Gln)  | Epileptic encephalopathy, early infantile, 32               | Uncertain significance(Last reviewed: Jul 13, 2017) | criteria provided, single submitter                  | VCV000976219 | 1                | 110604493      | 976219      | 964122      | rs1194485302 | GOF        | 0.495    | 0.142        | 0.363    |
| KCNA2 | 100 | R   | Q   | NM_004974.4(KCNA2):c.299G>A (p.Arg100Gln) | Epileptic encephalopathy, early infantile, 32               | Uncertain significance(Last reviewed: Oct 9, 2020)  | criteria provided, single submitter                  | VCV001025134 | 1                | 110604484      | 1025134     | 1002021     | rs1649509246 | GOF        | 0.537    | 0.106        | 0.357    |
| KCNA2 | 117 | E   | D   | NM_004974.4(KCNA2):c.351G>T (p.Glu117Asp) | Epileptic encephalopathy, early infantile, 32               | Uncertain significance(Last reviewed: Dec 13, 2019) | criteria provided, single submitter                  | VCV000854988 | 1                | 110604432      | 854988      | 822500      | rs1649507257 | GOF        | 0.515    | 0.115        | 0.371    |
| KCNA2 | 122 | A   | T   | NM_004974.4(KCNA2):c.364G>A (p.Ala122Thr) | Epileptic encephalopathy, early infantile, 32               | Uncertain significance(Last reviewed: Jan 11, 2020) | criteria provided, single submitter                  | VCV000998665 | 1                | 110604419      | 998665      | 986800      | rs1366378482 | GOF        | 0.614    | 0.055        | 0.331    |
| KCNA2 | 141 | P   | H   | NM_004974.4(KCNA2):c.422C>A (p.Pro141His) | Epileptic encephalopathy, early infantile, 32               | Uncertain significance(Last reviewed: Jul 1, 2020)  | criteria provided, single submitter                  | VCV001010084 | 1                | 110604361      | 1010084     | 986799      | rs1649502580 | GOF        | 0.553    | 0.112        | 0.335    |
| KCNA2 | 150 | W   | R   | NM_004974.4(KCNA2):c.448T>C (p.Trp150Arg) | Epileptic encephalopathy, early infantile, 32(not provided) | Uncertain significance(Last reviewed: Mar 2, 2020)  | criteria provided, multiple submitters, no conflicts | VCV001016452 | 1                | 110604335      | 1016452     | 1002020     | rs1649500367 | GOF        | 0.617    | 0.053        | 0.33     |
| KCNA2 | 154 | E   | Q   | NM_004974.4(KCNA2):c.460G>C (p.Glu154Gln) | not provided                                                | Uncertain significance(Last reviewed: Jul 11, 2019) | criteria provided, single submitter                  | VCV001306994 | 1                | 110604323      | 1306994     | 1295943     | NA           | GOF        | 0.573    | 0.042        | 0.385    |
| KCNA2 | 156 | P   | S   | NM_004974.4(KCNA2):c.466C>T (p.Pro156Ser) | Epileptic encephalopathy, early infantile, 32               | Uncertain significance(Last reviewed: Oct 3, 2020)  | criteria provided, single submitter                  | VCV000862623 | 1                | 110604317      | 862623      | 822499      | rs1649498927 | GOF        | 0.616    | 0.065        | 0.319    |

| gene  | pos | aa1 | aa2 | Name                                      | Condition(s)                                                | Clinical significance (Last reviewed)                                    | Review status                                  | Accession    | GRCh38Chromosome | GRCh38Location | VariationID | AlleleID(s) | dbSNP ID     | prediction | prob.LOF | prob.Neutral | prob.GOF |
|-------|-----|-----|-----|-------------------------------------------|-------------------------------------------------------------|--------------------------------------------------------------------------|------------------------------------------------|--------------|------------------|----------------|-------------|-------------|--------------|------------|----------|--------------|----------|
| KCNA2 | 178 | V   | I   | NM_004974.4(KCNA2):c.532G>A (p.Val178Ile) | not provided                                                | Uncertain significance(Last reviewed: Jul 3, 2019)                       | criteria provided, single submitter            | VCV001306817 | 1                | 110604251      | 1306817     | 1295767     | NA           | GOF        | 0.64     | 0.067        | 0.292    |
| KCNA2 | 179 | S   | N   | NM_004974.4(KCNA2):c.536G>A (p.Ser179Asn) | Epileptic encephalopathy, early infantile, 32               | Uncertain significance(Last reviewed: Oct 23, 2020)                      | criteria provided, single submitter            | VCV001059155 | 1                | 110604247      | 1059155     | 1039347     | NA           | GOF        | 0.501    | 0.041        | 0.458    |
| KCNA2 | 182 | L   | M   | NM_004974.4(KCNA2):c.544C>A (p.Leu182Met) | Epileptic encephalopathy, early infantile, 32               | Uncertain significance(Last reviewed: Aug 20, 2020)                      | criteria provided, single submitter            | VCV001005091 | 1                | 110604239      | 1005091     | 986798      | rs367662144  | GOF        | 0.655    | 0.062        | 0.284    |
| KCNA2 | 183 | E   | K   | NM_004974.4(KCNA2):c.547G>A (p.Glu183Lys) | Epileptic encephalopathy, early infantile, 32(not provided) | Conflicting interpretations of pathogenicity(Last reviewed: Nov 1, 2019) | criteria provided, conflicting interpretations | VCV000542661 | 1                | 110604236      | 542661      | 514988      | rs1553181398 | GOF        | 0.672    | 0.044        | 0.284    |
| KCNA2 | 189 | R   | W   | NM_004974.4(KCNA2):c.565C>T (p.Arg189Trp) | Epileptic encephalopathy, early infantile, 32               | Uncertain significance(Last reviewed: Oct 24, 2018)                      | criteria provided, single submitter            | VCV000569307 | 1                | 110604218      | 569307      | 556976      | rs770611476  | LOF        | 0.82     | 0.096        | 0.084    |
| KCNA2 | 197 | G   | D   | NM_004974.4(KCNA2):c.590G>A (p.Gly197Asp) | Seizures                                                    | Uncertain significance(Last reviewed: Apr 4, 2017)                       | criteria provided, single submitter            | VCV000588883 | 1                | 110604193      | 588883      | 578709      | rs752985457  | Neutral    | 0.592    | 0.247        | 0.161    |
| KCNA2 | 198 | S   | G   | NM_004974.4(KCNA2):c.592A>G (p.Ser198Gly) | Epileptic encephalopathy, early infantile, 32               | Uncertain significance(Last reviewed: Feb 20, 2020)                      | criteria provided, single submitter            | VCV001019596 | 1                | 110604191      | 1019596     | 1002019     | rs1649489553 | Neutral    | 0.586    | 0.256        | 0.158    |
| KCNA2 | 204 | T   | I   | NM_004974.4(KCNA2):c.611C>T (p.Thr204Ile) | Epileptic encephalopathy, early infantile, 32               | Likely benign(Last reviewed: Jun 7, 2020)                                | criteria provided, single submitter            | VCV000948207 | 1                | 110604172      | 948207      | 921565      | rs1421276694 | Neutral    | 0.615    | 0.216        | 0.169    |
| KCNA2 | 209 | T   | A   | NM_004974.4(KCNA2):c.625A>G (p.Thr209Ala) | Epileptic encephalopathy, early infantile, 32               | Uncertain significance(Last reviewed: Jul 18, 2019)                      | criteria provided, single submitter            | VCV000956614 | 1                | 110604158      | 956614      | 941368      | rs1649486218 | Neutral    | 0.578    | 0.242        | 0.18     |
| KCNA2 | 209 | T   | S   | NM_004974.4(KCNA2):c.625A>T (p.Thr209Ser) | not provided                                                | Uncertain significance(Last reviewed: Jan 7, 2020)                       | criteria provided, single submitter            | VCV001311940 | 1                | 110604158      | 1311940     | 1302471     | NA           | Neutral    | 0.556    | 0.264        | 0.18     |
| KCNA2 | 211 | G   | R   | NM_004974.4(KCNA2):c.631G>A (p.Gly211Arg) | Epileptic encephalopathy, early infantile, 32               | Uncertain significance(Last reviewed: Jul 17, 2018)                      | criteria provided, single submitter            | VCV000582691 | 1                | 110604152      | 582691      | 556585      | rs149727427  | Neutral    | 0.605    | 0.227        | 0.168    |
| KCNA2 | 232 | W   | R   | NM_004974.4(KCNA2):c.694T>A (p.Trp232Arg) | Inborn genetic diseases                                     | Uncertain significance(Last reviewed: May 1, 2017)                       | criteria provided, single submitter            | VCV000521733 | 1                | 110604089      | 521733      | 511150      | rs1553181370 | GOF        | 0.691    | 0.066        | 0.243    |
| KCNA2 | 232 | W   | S   | NM_004974.4(KCNA2):c.695G>C (p.Trp232Ser) | Epileptic encephalopathy, early infantile, 32               | Uncertain significance(Last reviewed: Feb 26, 2019)                      | criteria provided, single submitter            | VCV000639637 | 1                | 110604088      | 639637      | 626574      | rs1570753354 | LOF        | 0.725    | 0.064        | 0.211    |
| KCNA2 | 234 | S   | P   | NM_004974.4(KCNA2):c.700T>C (p.Ser234Pro) | not provided                                                | Uncertain significance(Last reviewed: Jul 14, 2020)                      | criteria provided, single submitter            | VCV001313077 | 1                | 110604083      | 1313077     | 1303338     | NA           | GOF        | 0.611    | 0.054        | 0.335    |
| KCNA2 | 246 | S   | I   | NM_004974.4(KCNA2):c.737G>T (p.Ser246Ile) | Epileptic encephalopathy, early infantile, 32               | Uncertain significance(Last reviewed: Oct 19, 2019)                      | criteria provided, single submitter            | VCV000971175 | 1                | 110604046      | 971175      | 952010      | rs1649481724 | GOF        | 0.568    | 0.07         | 0.361    |
| KCNA2 | 247 | K   | E   | NM_004974.4(KCNA2):c.739A>G (p.Lys247Glu) | not provided                                                | Uncertain significance(Last reviewed: Last reviewed)                     | criteria provided, single submitter            | VCV001303863 | 1                | 110604044      | 1303863     | 1294138     | NA           | GOF        | 0.588    | 0.059        | 0.353    |

| gene  | pos | aa1 | aa2 | Name                                      | Condition(s)                                                                       | Clinical significance (Last reviewed)                    | Review status                              | Accession    | GRCh38Chromosome | GRCh38Location | VariationID | AlleleID(s) | dbSNP ID     | prediction | prob.LOF | prob.Neutral | prob.GOF |
|-------|-----|-----|-----|-------------------------------------------|------------------------------------------------------------------------------------|----------------------------------------------------------|--------------------------------------------|--------------|------------------|----------------|-------------|-------------|--------------|------------|----------|--------------|----------|
|       |     |     |     |                                           |                                                                                    | reviewed: Sep 4, 2020)                                   | submitter                                  |              |                  |                |             |             |              |            |          |              |          |
| KCNA2 | 249 | G   | S   | NM_004974.4(KCNA2):c.745G>A (p.Gly249Ser) | Epileptic encephalopathy, early infantile, 32                                      | Uncertain significance(Last reviewed: Apr 8, 2019)       | criteria provided, single submitter        | VCV000850411 | 1                | 110604038      | 850411      | 822497      | rs746926057  | GOF        | 0.557    | 0.07         | 0.373    |
| KCNA2 | 252 | T   | A   | NM_004974.4(KCNA2):c.754A>G (p.Thr252Ala) | Epileptic encephalopathy, early infantile, 32                                      | Uncertain significance(Last reviewed: Jul 10, 2020)      | criteria provided, single submitter        | VCV000948350 | 1                | 110604029      | 948350      | 921564      | rs772053786  | GOF        | 0.5      | 0.051        | 0.449    |
| KCNA2 | 254 | I   | N   | NM_004974.4(KCNA2):c.761T>A (p.Ile254Asn) | Epileptic encephalopathy, early infantile, 32                                      | Uncertain significance(Last reviewed: Dec 24, 2019)      | criteria provided, single submitter        | VCV000849504 | 1                | 110604022      | 849504      | 822496      | rs1649480102 | GOF        | 0.556    | 0.049        | 0.395    |
| KCNA2 | 256 | N   | I   | NM_004974.4(KCNA2):c.767A>T (p.Asn256Ile) | not provided                                                                       | Uncertain significance(Last reviewed: Aug 27, 2019)      | criteria provided, single submitter        | VCV001307977 | 1                | 110604016      | 1307977     | 1297924     | NA           | GOF        | 0.697    | 0.036        | 0.267    |
| KCNA2 | 259 | D   | A   | NM_004974.4(KCNA2):c.776A>C (p.Asp259Ala) | Epileptic encephalopathy, early infantile, 32                                      | Uncertain significance(Last reviewed: Oct 6, 2020)       | criteria provided, single submitter        | VCV001010948 | 1                | 110604007      | 1010948     | 986797      | rs1649479585 | GOF        | 0.662    | 0.037        | 0.301    |
| KCNA2 | 261 | V   | A   | NM_004974.4(KCNA2):c.782T>C (p.Val261Ala) | Epileptic encephalopathy, early infantile, 32                                      | Uncertain significance(Last reviewed: Apr 2, 2019)       | criteria provided, single submitter        | VCV000845684 | 1                | 110604001      | 845684      | 822495      | rs1649479037 | GOF        | 0.669    | 0.058        | 0.273    |
| KCNA2 | 263 | I   | T   | NM_004974.4(KCNA2):c.788T>C (p.Ile263Thr) | Epileptic encephalopathy, early infantile, 32                                      | Likely pathogenic(Last reviewed: Dec 19, 2019)           | criteria provided, single submitter        | VCV000190326 | 1                | 110603995      | 190326      | 188153      | rs786205231  | GOF        | 0.674    | 0.049        | 0.278    |
| KCNA2 | 280 | D   | N   | NM_004974.4(KCNA2):c.838G>A (p.Asp280Asn) | not provided                                                                       | Uncertain significance(Last reviewed: Jul 17, 2019)      | criteria provided, single submitter        | VCV001306971 | 1                | 110603945      | 1306971     | 1295920     | NA           | Neutral    | 0.499    | 0.333        | 0.168    |
| KCNA2 | 281 | A   | T   | NM_004974.4(KCNA2):c.841G>A (p.Ala281Thr) | Epileptic encephalopathy, early infantile, 32                                      | Uncertain significance(Last reviewed: May 3, 2018)       | criteria provided, single submitter        | VCV000581469 | 1                | 110603942      | 581469      | 556583      | rs753926939  | Neutral    | 0.56     | 0.258        | 0.181    |
| KCNA2 | 284 | G   | D   | NM_004974.4(KCNA2):c.851G>A (p.Gly284Asp) | Epileptic encephalopathy, early infantile, 32                                      | Uncertain significance(Last reviewed: Jul 2, 2018)       | criteria provided, single submitter        | VCV000578279 | 1                | 110603932      | 578279      | 556974      | rs1246925002 | LOF        | 0.631    | 0.147        | 0.222    |
| KCNA2 | 284 | G   | R   | NM_004974.4(KCNA2):c.850G>C (p.Gly284Arg) | not provided                                                                       | Uncertain significance(Last reviewed: Jan 3, 2022)       | criteria provided, single submitter        | VCV001326483 | 1                | 110603933      | 1326483     | 1316843     | NA           | Neutral    | 0.596    | 0.163        | 0.242    |
| KCNA2 | 288 | M   | V   | NM_004974.4(KCNA2):c.862A>G (p.Met288Val) | Epileptic encephalopathy, early infantile, 32                                      | Uncertain significance(Last reviewed: Mar 6, 2020)       | criteria provided, single submitter        | VCV001026363 | 1                | 110603921      | 1026363     | 1002018     | rs1486839913 | GOF        | 0.646    | 0.064        | 0.29     |
| KCNA2 | 290 | L   | P   | NM_004974.4(KCNA2):c.869T>C (p.Leu290Pro) | not provided                                                                       | Likely pathogenic(Last reviewed: Apr 6, 2017)            | criteria provided, single submitter        | VCV000426735 | 1                | 110603914      | 426735      | 414722      | rs1085307768 | GOF        | 0.508    | 0.046        | 0.446    |
| KCNA2 | 290 | L   | R   | NM_004974.4(KCNA2):c.869T>G (p.Leu290Arg) | Inborn genetic diseases                                                            | Likely pathogenic(Last reviewed: Jul 16, 2018)           | criteria provided, single submitter        | VCV000985630 | 1                | 110603914      | 985630      | 973123      | rs1085307768 | GOF        | 0.428    | 0.048        | 0.525    |
| KCNA2 | 294 | R   | H   | NM_004974.4(KCNA2):c.881G>A (p.Arg294His) | Inborn genetic diseases not provided Epileptic encephalopathy, early infantile, 32 | Pathogenic/Likely pathogenic(Last reviewed: Jul 8, 2021) | criteria provided, multiple submitters, no | VCV000280584 | 1                | 110603902      | 280584      | 263933      | rs886041761  | GOF        | 0.492    | 0.046        | 0.462    |

| gene  | pos | aa1 | aa2 | Name                                      | Condition(s)                                                                                                                                                 | Clinical significance (Last reviewed)               | Review status                                        | Accession    | GRCh38Chromosome | GRCh38Location | VariationID | AlleleID(s) | dbSNP ID     | prediction | prob.LOF | prob.Neutral | prob.GOF |
|-------|-----|-----|-----|-------------------------------------------|--------------------------------------------------------------------------------------------------------------------------------------------------------------|-----------------------------------------------------|------------------------------------------------------|--------------|------------------|----------------|-------------|-------------|--------------|------------|----------|--------------|----------|
|       |     |     |     |                                           |                                                                                                                                                              |                                                     | conflicts                                            |              |                  |                |             |             |              |            |          |              |          |
| KCNA2 | 297 | R   | Q   | NM_004974.4(KCNA2):c.890G>A (p.Arg297Gln) | Inborn genetic diseases not provided Epileptic encephalopathy, early infantile, 32 Epileptic encephalopathy, early infantile, 1  Neurodevelopmental disorder | Pathogenic(Last reviewed: Oct 2, 2021)              | criteria provided, multiple submitters, no conflicts | VCV000190328 | 1                | 110603893      | 190328      | 188155      | rs786205232  | GOF        | 0.476    | 0.047        | 0.478    |
| KCNA2 | 297 | R   | W   | NM_004974.4(KCNA2):c.889C>T (p.Arg297Trp) | Epileptic encephalopathy, early infantile, 32 not provided                                                                                                   | Pathogenic(Last reviewed: Oct 23, 2020)             | criteria provided, multiple submitters, no conflicts | VCV000986989 | 1                | 110603894      | 986989      | 974944      | rs1649473972 | GOF        | 0.604    | 0.043        | 0.353    |
| KCNA2 | 298 | L   | F   | NM_004974.4(KCNA2):c.894G>T (p.Leu298Phe) | Epileptic encephalopathy, early infantile, 32 not provided                                                                                                   | Pathogenic(Last reviewed: Mar 1, 2017)              | criteria provided, single submitter                  | VCV000190327 | 1                | 110603889      | 190327      | 188154      | rs876657390  | GOF        | 0.455    | 0.051        | 0.494    |
| KCNA2 | 299 | V   | L   | NM_004974.4(KCNA2):c.895G>C (p.Val299Leu) | Epileptic encephalopathy, early infantile, 32                                                                                                                | Uncertain significance(Last reviewed: May 26, 2017) | criteria provided, single submitter                  | VCV000476054 | 1                | 110603888      | 476054      | 447041      | rs1553181334 | GOF        | 0.484    | 0.051        | 0.465    |
| KCNA2 | 300 | R   | S   | NM_004974.4(KCNA2):c.900A>T (p.Arg300Ser) | Epileptic encephalopathy, early infantile, 32                                                                                                                | Likely pathogenic(Last reviewed: Jul 23, 2020)      | criteria provided, single submitter                  | VCV001066046 | 1                | 110603883      | 1066046     | 1054728     | NA           | GOF        | 0.507    | 0.045        | 0.448    |
| KCNA2 | 302 | F   | L   | NM_004974.4(KCNA2):c.906T>G (p.Phe302Leu) | Epileptic encephalopathy, early infantile, 1                                                                                                                 | Likely pathogenic(Last reviewed: Jan 1, 2020)       | no assertion criteria provided                       | VCV001174095 | 1                | 110603877      | 1174095     | 1163172     | NA           | GOF        | 0.536    | 0.057        | 0.407    |
| KCNA2 | 307 | L   | W   | NM_004974.4(KCNA2):c.920T>G (p.Leu307Trp) | Epileptic encephalopathy, early infantile, 32                                                                                                                | Uncertain significance(Last reviewed: Feb 27, 2020) | criteria provided, single submitter                  | VCV001004548 | 1                | 110603863      | 1004548     | 986796      | rs1649471614 | GOF        | 0.543    | 0.048        | 0.41     |
| KCNA2 | 309 | R   | G   | NM_004974.4(KCNA2):c.925A>G (p.Arg309Gly) | not provided                                                                                                                                                 | Uncertain significance(Last reviewed: Oct 26, 2020) | criteria provided, single submitter                  | VCV001313559 | 1                | 110603858      | 1313559     | 1303820     | NA           | GOF        | 0.685    | 0.055        | 0.26     |
| KCNA2 | 310 | H   | R   | NM_004974.4(KCNA2):c.929A>G (p.His310Arg) | Epileptic encephalopathy, early infantile, 32                                                                                                                | Likely pathogenic(Last reviewed: Nov 9, 2018)       | no assertion criteria provided                       | VCV000975835 | 1                | 110603854      | 975835      | 964109      | rs1649470988 | GOF        | 0.494    | 0.065        | 0.441    |
| KCNA2 | 320 | T   | I   | NM_004974.4(KCNA2):c.959C>T (p.Thr320Ile) | Epileptic encephalopathy, early infantile, 32                                                                                                                | Likely pathogenic(Last reviewed: Jan 1, 2018)       | criteria provided, single submitter                  | VCV000495271 | 1                | 110603824      | 495271      | 486730      | rs1553181323 | GOF        | 0.652    | 0.047        | 0.3      |
| KCNA2 | 321 | L   | F   | NM_004974.4(KCNA2):c.961C>T (p.Leu321Phe) | Epileptic encephalopathy, early infantile, 32                                                                                                                | Uncertain significance(Last reviewed: Apr 25, 2018) | criteria provided, single submitter                  | VCV000583343 | 1                | 110603822      | 583343      | 556554      | rs1557732226 | GOF        | 0.696    | 0.06         | 0.245    |
| KCNA2 | 329 | A   | V   | NM_004974.4(KCNA2):c.*1204C>T             | not provided                                                                                                                                                 | Benign(Last reviewed: Nov 20, 2020)                 | criteria provided, multiple submitters, no conflicts | VCV000586061 | 1                | 110602079      | 586061      | 576390      | rs115258190  | GOF        | 0.58     | 0.042        | 0.378    |
| KCNA2 | 330 | L   | H   | NM_004974.4(KCNA2):c.989T>A (p.Leu330His) | not provided                                                                                                                                                 | Uncertain significance(Last reviewed: Aug 20, 2019) | criteria provided, single submitter                  | VCV001307978 | 1                | 110603794      | 1307978     | 1297925     | NA           | GOF        | 0.528    | 0.04         | 0.432    |
| KCNA2 | 330 | L   | R   | NM_004974.4(KCNA2):c.989T>G (p.Leu330Arg) | not provided                                                                                                                                                 | Likely pathogenic(Last reviewed: Nov 18, 2016)      | criteria provided, single submitter                  | VCV000390269 | 1                | 110603794      | 390269      | 364357      | rs1057523703 | GOF        | 0.544    | 0.045        | 0.411    |
| KCNA2 | 331 | M   | V   | NM_004974.4(KCNA2):c.*1209A>G             | not provided                                                                                                                                                 | Uncertain significance(Last reviewed: )             | criteria provided, single submitter                  | VCV001298434 | 1                | 110602074      | 1298434     | 1288296     | NA           | GOF        | 0.569    | 0.052        | 0.379    |

| gene  | pos | aa1 | aa2 | Name                                       | Condition(s)                                               | Clinical significance (Last reviewed)                                     | Review status                                        | Accession    | GRCh38Chromosome | GRCh38Location | VariationID | AlleleID(s) | dbSNP ID     | prediction | prob.LOF | prob.Neutral | prob.GOF |  |
|-------|-----|-----|-----|--------------------------------------------|------------------------------------------------------------|---------------------------------------------------------------------------|------------------------------------------------------|--------------|------------------|----------------|-------------|-------------|--------------|------------|----------|--------------|----------|--|
|       |     |     |     |                                            |                                                            |                                                                           | reviewed: Jul 1, 2021)                               | submitter    |                  |                |             |             |              |            |          |              |          |  |
| KCNA2 | 333 | F   | L   | NM_004974.4(KCNA2):c.997T>C (p.Phe333Leu)  | Epileptic encephalopathy, early infantile, 32              | Uncertain significance(Last reviewed: Apr 23, 2018)                       | criteria provided, single submitter                  | VCV000575248 | 1                | 110603786      | 575248      | 556552      | rs1557732183 | GOF        | 0.618    | 0.057        | 0.325    |  |
| KCNA2 | 338 | G   | E   | NM_004974.4(KCNA2):c.1013G>A (p.Gly338Glu) | Epileptic encephalopathy, early infantile, 32 not provided | Likely pathogenic(Last reviewed: Jun 1, 2021)                             | criteria provided, multiple submitters, no conflicts | VCV000542660 | 1                | 110603770      | 542660      | 515037      | rs1553181301 | GOF        | 0.64     | 0.038        | 0.322    |  |
| KCNA2 | 341 | L   | P   | NM_004974.4(KCNA2):c.1022T>C (p.Leu341Pro) | not provided                                               | Uncertain significance(Last reviewed: Jul 1, 2020)                        | criteria provided, single submitter                  | VCV001306680 | 1                | 110603761      | 1306680     | 1296623     | NA           | GOF        | 0.641    | 0.05         | 0.309    |  |
| KCNA2 | 343 | D   | N   | NM_004974.4(KCNA2):c.*1245G>A              | not provided                                               | Likely benign(Last reviewed: Jan 3, 2020)                                 | criteria provided, single submitter                  | VCV000392819 | 1                | 110602038      | 392819      | 364351      | rs756992381  | GOF        | 0.576    | 0.037        | 0.387    |  |
| KCNA2 | 343 | S   | F   | NM_004974.4(KCNA2):c.1028C>T (p.Ser343Phe) | Epileptic encephalopathy, early infantile, 32              | Uncertain significance(Last reviewed: Feb 11, 2018)                       | criteria provided, single submitter                  | VCV000578773 | 1                | 110603755      | 578773      | 556834      | rs1557732150 | GOF        | 0.652    | 0.03         | 0.318    |  |
| KCNA2 | 354 | R   | Q   | NM_004974.4(KCNA2):c.1061G>A (p.Arg354Gln) | Epileptic encephalopathy, early infantile, 32              | Uncertain significance(Last reviewed: Feb 17, 2020)                       | criteria provided, single submitter                  | VCV000855444 | 1                | 110603722      | 855444      | 822494      | rs374827915  | Neutral    | 0.457    | 0.379        | 0.164    |  |
| KCNA2 | 355 | E   | D   | NM_004974.4(KCNA2):c.1065G>T (p.Glu355Asp) | Epileptic encephalopathy, early infantile, 32              | Uncertain significance(Last reviewed: Mar 6, 2020)                        | criteria provided, single submitter                  | VCV001038969 | 1                | 110603718      | 1038969     | 1022528     | rs1308544471 | Neutral    | 0.497    | 0.319        | 0.184    |  |
| KCNA2 | 356 | S   | C   | NM_004974.4(KCNA2):c.1067C>G (p.Ser356Cys) | Epileptic encephalopathy, early infantile, 32              | Uncertain significance(Last reviewed: Nov 7, 2019)                        | criteria provided, single submitter                  | VCV000939630 | 1                | 110603716      | 939630      | 929953      | rs1317841788 | GOF        | 0.656    | 0.116        | 0.229    |  |
| KCNA2 | 362 | P   | A   | NM_004974.4(KCNA2):c.1084C>G (p.Pro362Ala) | not provided                                               | Likely pathogenic(Last reviewed: Aug 15, 2016)                            | criteria provided, single submitter                  | VCV000430451 | 1                | 110603699      | 430451      | 421156      | rs1131691974 | GOF        | 0.691    | 0.034        | 0.275    |  |
| KCNA2 | 370 | V   | I   | NM_004974.4(KCNA2):c.1108G>A (p.Val370Ile) | Epileptic encephalopathy, early infantile, 32              | Uncertain significance(Last reviewed: Sep 10, 2019)                       | criteria provided, single submitter                  | VCV000934618 | 1                | 110603675      | 934618      | 929952      | rs756214647  | GOF        | 0.622    | 0.05         | 0.328    |  |
| KCNA2 | 373 | T   | I   | NM_004974.4(KCNA2):c.1118C>T (p.Thr373Ile) | not provided Epileptic encephalopathy, early infantile, 32 | Conflicting interpretations of pathogenicity(Last reviewed: Dec 30, 2019) | criteria provided, conflicting interpretations       | VCV000452594 | 1                | 110603665      | 452594      | 442578      | rs1553181282 | LOF        | 0.719    | 0.047        | 0.234    |  |
| KCNA2 | 374 | T   | A   | NM_004974.4(KCNA2):c.1120A>G (p.Thr374Ala) | Epileptic encephalopathy, early infantile, 32              | Pathogenic(Last reviewed: May 28, 2019)                                   | criteria provided, multiple submitters, no conflicts | VCV000559647 | 1                | 110603663      | 559647      | 550344      | rs1553181280 | LOF        | 0.769    | 0.066        | 0.165    |  |
| KCNA2 | 376 | G   | A   | NM_004974.4(KCNA2):c.1127G>C (p.Gly376Ala) | Epileptic encephalopathy, early infantile, 32              | Uncertain significance(Last reviewed: Jun 1, 2018)                        | criteria provided, single submitter                  | VCV000577200 | 1                | 110603656      | 577200      | 556550      | rs1557732017 | LOF        | 0.825    | 0.061        | 0.114    |  |
| KCNA2 | 379 | D   | H   | NM_004974.4(KCNA2):c.1135G>C (p.Asp379His) | not provided                                               | Likely pathogenic(Last reviewed: Nov 18, 2019)                            | criteria provided, single submitter                  | VCV001196855 | 1                | 110603648      | 1196855     | 1186033     | NA           | LOF        | 0.775    | 0.129        | 0.096    |  |
| KCNA2 | 382 | P   | L   | NM_004974.4(KCNA2):c.1145C>T (p.Pro382Leu) | not provided Epileptic encephalopathy, early infantile, 32 | Uncertain significance(Last reviewed: Apr 5,                              | criteria provided, multiple                          | VCV000579198 | 1                | 110603638      | 579198      | 556581      | rs777008812  | LOF        | 0.743    | 0.062        | 0.195    |  |

| gene  | pos | aa1 | aa2 | Name                                       | Condition(s)                                                                      | Clinical significance (Last reviewed)                                    | Review status                                        | Accession    | GRCh38Chromosome | GRCh38Location | VariationID | AlleleID(s) | dbSNP ID     | prediction | prob.LOF | prob.Neutral | prob.GOF |
|-------|-----|-----|-----|--------------------------------------------|-----------------------------------------------------------------------------------|--------------------------------------------------------------------------|------------------------------------------------------|--------------|------------------|----------------|-------------|-------------|--------------|------------|----------|--------------|----------|
|       |     |     |     |                                            |                                                                                   | 2021)                                                                    | submitters, no conflicts                             |              |                  |                |             |             |              |            |          |              |          |
| KCNA2 | 385 | I   | T   | NM_004974.4(KCNA2):c.1154T>C (p.Ile385Thr) | Epileptic encephalopathy, early infantile, 32                                     | Uncertain significance(Last reviewed: Nov 7, 2017)                       | criteria provided, single submitter                  | VCV000542662 | 1                | 110603629      | 542662      | 515024      | rs1197586006 | GOF        | 0.607    | 0.071        | 0.322    |
| KCNA2 | 392 | S   | F   | NM_004974.4(KCNA2):c.1175C>T (p.Ser392Phe) | Epileptic encephalopathy, early infantile, 32                                     | Uncertain significance(Last reviewed: Apr 2, 2020)                       | criteria provided, single submitter                  | VCV001060438 | 1                | 110603608      | 1060438     | 1039345     | NA           | GOF        | 0.614    | 0.035        | 0.351    |
| KCNA2 | 395 | A   | V   | NM_004974.4(KCNA2):c.1184C>T (p.Ala395Val) | not provided                                                                      | Uncertain significance(Last reviewed: Feb 1, 2017)                       | criteria provided, single submitter                  | VCV000806185 | 1                | 110603599      | 806185      | 794368      | rs1570752776 | GOF        | 0.654    | 0.045        | 0.302    |
| KCNA2 | 399 | V   | G   | NM_004974.4(KCNA2):c.1196T>G (p.Val399Gly) | Epileptic encephalopathy, early infantile, 32                                     | Uncertain significance(Last reviewed: Jul 1, 2020)                       | criteria provided, single submitter                  | VCV001019183 | 1                | 110603587      | 1019183     | 1002017     | rs1649457707 | GOF        | 0.64     | 0.045        | 0.316    |
| KCNA2 | 399 | V   | M   | NM_004974.4(KCNA2):c.1195G>A (p.Val399Met) | KCN2A-Related Disorder not provided Epileptic encephalopathy, early infantile, 32 | Likely pathogenic(Last reviewed: Aug 28, 2017)                           | criteria provided, single submitter                  | VCV000420845 | 1                | 110603588      | 420845      | 404879      | rs1064794738 | GOF        | 0.536    | 0.047        | 0.417    |
| KCNA2 | 401 | T   | I   | NM_004974.4(KCNA2):c.1202C>T (p.Thr401Ile) | not provided                                                                      | Pathogenic(Last reviewed: Jun 25, 2021)                                  | criteria provided, single submitter                  | VCV000430391 | 1                | 110603581      | 430391      | 421155      | rs1131691939 | GOF        | 0.604    | 0.036        | 0.36     |
| KCNA2 | 402 | I   | T   | NM_004974.4(KCNA2):c.1205T>C (p.Ile402Thr) | not provided                                                                      | Uncertain significance(Last reviewed: Aug 7, 2019)                       | criteria provided, single submitter                  | VCV001307633 | 1                | 110603578      | 1307633     | 1297581     | NA           | GOF        | 0.544    | 0.044        | 0.412    |
| KCNA2 | 403 | A   | V   | NM_004974.4(KCNA2):c.1208C>T (p.Ala403Val) | Epileptic encephalopathy, early infantile, 32 not provided                        | Conflicting interpretations of pathogenicity(Last reviewed: Jan 1, 2020) | criteria provided, conflicting interpretations       | VCV000871870 | 1                | 110603575      | 871870      | 858825      | rs1649457143 | GOF        | 0.578    | 0.042        | 0.38     |
| KCNA2 | 404 | L   | I   | NM_004974.4(KCNA2):c.1210T>A (p.Leu404Ile) | Epileptic encephalopathy, early infantile, 32                                     | Likely pathogenic(Last reviewed: Feb 24, 2020)                           | criteria provided, single submitter                  | VCV001068304 | 1                | 110603573      | 1068304     | 1054727     | NA           | GOF        | 0.596    | 0.056        | 0.348    |
| KCNA2 | 405 | P   | L   | NM_004974.4(KCNA2):c.1214C>T (p.Pro405Leu) | Epileptic encephalopathy, early infantile, 32 not provided                        | Pathogenic/Likely pathogenic(Last reviewed: Nov 17, 2021)                | criteria provided, multiple submitters, no conflicts | VCV000190325 | 1                | 110603569      | 190325      | 188152      | NA           | LOF        | 0.863    | 0.038        | 0.1      |
| KCNA2 | 405 | P   | R   | NM_004974.4(KCNA2):c.1214C>G (p.Pro405Arg) | Epileptic encephalopathy, early infantile, 32                                     | Uncertain significance(Last reviewed: Nov 4, 2019)                       | criteria provided, single submitter                  | VCV000966763 | 1                | 110603569      | 966763      | 952009      | rs876657389  | LOF        | 0.801    | 0.046        | 0.153    |
| KCNA2 | 406 | V   | F   | NM_004974.4(KCNA2):c.1216G>T (p.Val406Phe) | Epileptic encephalopathy, early infantile, 32                                     | Uncertain significance(Last reviewed: Apr 5, 2018)                       | criteria provided, single submitter                  | VCV000542666 | 1                | 110603567      | 542666      | 515018      | rs1553181257 | LOF        | 0.778    | 0.047        | 0.175    |
| KCNA2 | 407 | P   | A   | NM_004974.4(KCNA2):c.1219C>G (p.Pro407Ala) | Epileptic encephalopathy, early infantile, 32 not provided                        | Likely pathogenic(Last reviewed: Sep 18, 2019)                           | criteria provided, multiple submitters, no conflicts | VCV000623699 | 1                | 110603564      | 623699      | 612492      | rs1557731896 | LOF        | 0.834    | 0.038        | 0.129    |
| KCNA2 | 407 | P   | R   | NM_004974.4(KCNA2):c.1220C>G (p.Pro407Arg) | Epileptic encephalopathy, early infantile, 32                                     | Likely pathogenic(Last reviewed: Oct 9, 2020)                            | criteria provided, single submitter                  | VCV001067683 | 1                | 110603563      | 1067683     | 1054726     | NA           | LOF        | 0.79     | 0.044        | 0.166    |
| KCNA2 | 407 | P   | S   | NM_004974.4(KCNA2):c.1219C>T (p.Pro407Ser) | Epileptic encephalopathy, early infantile, 32                                     | Uncertain significance(Last reviewed: Oct 9, 2020)                       | criteria provided, single submitter                  | VCV000999097 | 1                | 110603564      | 999097      | 986795      | rs1557731896 | LOF        | 0.81     | 0.038        | 0.152    |



| gene  | pos | aa1 | aa2 | Name                                       | Condition(s)                                               | Clinical significance (Last reviewed)               | Review status                                        | Accession    | GRCh38Chromosome | GRCh38Location | VariationID | AlleleID(s) | dbSNP ID     | prediction | prob.LOF | prob.Neutral | prob.GOF |
|-------|-----|-----|-----|--------------------------------------------|------------------------------------------------------------|-----------------------------------------------------|------------------------------------------------------|--------------|------------------|----------------|-------------|-------------|--------------|------------|----------|--------------|----------|
|       |     |     |     |                                            |                                                            | reviewed: May 14, 2020)                             | submitter                                            |              |                  |                |             |             |              |            |          |              |          |
| KCNA2 | 408 | V   | A   | NM_004974.4(KCNA2):c.1223T>C (p.Val408Ala) | Epileptic encephalopathy, early infantile, 32              | Pathogenic(Last reviewed: Jan 1, 2014)              | criteria provided, single submitter                  | VCV000666316 | 1                | 110603560      | 666316      | 653844      | rs1570752696 | GOF        | 0.574    | 0.048        | 0.378    |
| KCNA2 | 408 | V   | G   | NM_004974.4(KCNA2):c.1223T>G (p.Val408Gly) | Epileptic encephalopathy, early infantile, 32              | Likely pathogenic(Last reviewed: Mar 28, 2020)      | criteria provided, single submitter                  | VCV000853263 | 1                | 110603560      | 853263      | 822493      | rs1570752696 | GOF        | 0.656    | 0.046        | 0.298    |
| KCNA2 | 414 | N   | K   | NM_004974.4(KCNA2):c.1242C>A (p.Asn414Lys) | Epileptic encephalopathy, early infantile, 32              | Uncertain significance(Last reviewed: Oct 30, 2020) | criteria provided, single submitter                  | VCV001002622 | 1                | 110603541      | 1002622     | 986794      | rs749520613  | GOF        | 0.624    | 0.047        | 0.329    |
| KCNA2 | 414 | N   | K   | NM_004974.4(KCNA2):c.1242C>A (p.Asn414Lys) | Epileptic encephalopathy, early infantile, 32              | Uncertain significance(Last reviewed: Oct 30, 2020) | criteria provided, single submitter                  | VCV001002622 | 1                | 110603541      | 1002622     | 986794      | rs749520613  | GOF        | 0.624    | 0.047        | 0.329    |
| KCNA2 | 414 | N   | K   | NM_004974.4(KCNA2):c.1242C>G (p.Asn414Lys) | Epileptic encephalopathy, early infantile, 32              | Uncertain significance(Last reviewed: Aug 29, 2018) | criteria provided, single submitter                  | VCV000662361 | 1                | 110603541      | 662361      | 626572      | rs749520613  | GOF        | 0.624    | 0.047        | 0.329    |
| KCNA2 | 414 | N   | K   | NM_004974.4(KCNA2):c.1242C>G (p.Asn414Lys) | Epileptic encephalopathy, early infantile, 32              | Uncertain significance(Last reviewed: Aug 29, 2018) | criteria provided, single submitter                  | VCV000662361 | 1                | 110603541      | 662361      | 626572      | rs749520613  | GOF        | 0.624    | 0.047        | 0.329    |
| KCNA2 | 416 | F   | L   | NM_004974.4(KCNA2):c.1248C>A (p.Phe416Leu) | not provided Epileptic encephalopathy, early infantile, 32 | Uncertain significance(Last reviewed: Oct 12, 2020) | criteria provided, multiple submitters, no conflicts | VCV001061921 | 1                | 110603535      | 1061921     | 1039344     | NA           | GOF        | 0.697    | 0.059        | 0.245    |
| KCNA2 | 417 | Y   | C   | NM_004974.4(KCNA2):c.1250A>G (p.Tyr417Cys) | Epileptic encephalopathy, early infantile, 32 not provided | Uncertain significance(Last reviewed: Oct 4, 2020)  | criteria provided, multiple submitters, no conflicts | VCV000623698 | 1                | 110603533      | 623698      | 612491      | rs1557731858 | LOF        | 0.737    | 0.059        | 0.204    |
| KCNA2 | 419 | R   | Q   | NM_004974.4(KCNA2):c.1256G>A (p.Arg419Gln) | Epileptic encephalopathy, early infantile, 32              | Uncertain significance(Last reviewed: Jun 21, 2019) | criteria provided, single submitter                  | VCV000476047 | 1                | 110603527      | 476047      | 447086      | rs1296710118 | GOF        | 0.607    | 0.091        | 0.302    |
| KCNA2 | 419 | R   | W   | NM_004974.4(KCNA2):c.1255C>T (p.Arg419Trp) | not provided                                               | Uncertain significance(Last reviewed: Dec 1, 2021)  | criteria provided, multiple submitters, no conflicts | VCV001254658 | 1                | 110603528      | 1254658     | 1244591     | NA           | GOF        | 0.642    | 0.1          | 0.259    |
| KCNA2 | 435 | C   | S   | NM_004974.4(KCNA2):c.1304G>C (p.Cys435Ser) | Epileptic encephalopathy, early infantile, 32              | Uncertain significance(Last reviewed: Oct 10, 2017) | criteria provided, single submitter                  | VCV000542664 | 1                | 110603479      | 542664      | 515005      | rs1553181236 | Neutral    | 0.629    | 0.178        | 0.193    |
| KCNA2 | 435 | C   | Y   | NM_004974.4(KCNA2):c.1304G>A (p.Cys435Tyr) | not provided                                               | Uncertain significance(Last reviewed: Jul 10, 2019) | criteria provided, single submitter                  | VCV001306936 | 1                | 110603479      | 1306936     | 1295885     | NA           | Neutral    | 0.638    | 0.175        | 0.187    |
| KCNA2 | 452 | T   | S   | NM_004974.4(KCNA2):c.1354A>T (p.Thr452Ser) | Epileptic encephalopathy, early infantile, 32              | Uncertain significance(Last reviewed: Jun 22, 2020) | criteria provided, single submitter                  | VCV001021350 | 1                | 110603429      | 1021350     | 1002016     | rs765999960  | Neutral    | 0.443    | 0.328        | 0.229    |
| KCNA2 | 458 | Y   | H   | NM_004974.4(KCNA2):c.1372T>C (p.Tyr458His) | Epileptic encephalopathy, early infantile, 32              | Uncertain significance(Last reviewed: Aug 2, 2020)  | criteria provided, single submitter                  | VCV001016870 | 1                | 110603411      | 1016870     | 1002015     | rs1649446402 | Neutral    | 0.556    | 0.283        | 0.161    |
| KCNA2 | 459 | M   | V   | NM_004974.4(KCNA2):c.1375A>G               | Epileptic encephalopathy, early infantile, 32              | Uncertain                                           | criteria                                             | VCV001341871 | 1                | 110603408      | 1341871     | 1333118     | NA           | Neutral    | 0.554    | 0.269        | 0.177    |

| gene  | pos | aa1 | aa2 | Name                                       | Condition(s)                                                                                    | Clinical significance (Last reviewed)               | Review status                       | Accession    | GRCh38Chromosome | GRCh38Location | VariationID | AlleleID(s) | dbSNP ID     | prediction | prob.LOF | prob.Neutral | prob.GOF |
|-------|-----|-----|-----|--------------------------------------------|-------------------------------------------------------------------------------------------------|-----------------------------------------------------|-------------------------------------|--------------|------------------|----------------|-------------|-------------|--------------|------------|----------|--------------|----------|
|       |     |     |     | (p.Met459Val)                              |                                                                                                 | significance(Last reviewed: Feb 23, 2021)           | provided, single submitter          |              |                  |                |             |             |              |            |          |              |          |
| KCNA2 | 460 | E   | D   | NM_004974.4(KCNA2):c.1380G>T (p.Glu460Asp) | Epileptic encephalopathy, early infantile, 32                                                   | Likely benign(Last reviewed: Sep 10, 2019)          | criteria provided, single submitter | VCV000833855 | 1                | 110603403      | 833855      | 821810      | rs1649445890 | Neutral    | 0.506    | 0.307        | 0.188    |
| KCNA2 | 462 | Q   | R   | NM_004974.4(KCNA2):c.1385A>G (p.Gln462Arg) | Epileptic encephalopathy, early infantile, 32                                                   | Likely benign(Last reviewed: Nov 13, 2020)          | criteria provided, single submitter | VCV001132372 | 1                | 110603398      | 1132372     | 1109274     | NA           | Neutral    | 0.457    | 0.34         | 0.202    |
| KCNA2 | 464 | G   | S   | NM_004974.4(KCNA2):c.1390G>A (p.Gly464Ser) | not provided                                                                                    | Uncertain significance(Last reviewed: Apr 8, 2019)  | criteria provided, single submitter | VCV001308309 | 1                | 110603393      | 1308309     | 1296930     | NA           | Neutral    | 0.515    | 0.266        | 0.219    |
| KCNA2 | 478 | K   | R   | NM_004974.4(KCNA2):c.1433A>G (p.Lys478Arg) | not provided                                                                                    | Uncertain significance(Last reviewed: Dec 17, 2018) | criteria provided, single submitter | VCV000804950 | 1                | 110603350      | 804950      | 792820      | rs1243868138 | Neutral    | 0.442    | 0.372        | 0.186    |
| KCNA2 | 480 | A   | T   | NM_004974.4(KCNA2):c.1438G>A (p.Ala480Thr) | not provided                                                                                    | Uncertain significance(Last reviewed: May 16, 2019) | criteria provided, single submitter | VCV001305909 | 1                | 110603345      | 1305909     | 1297180     | NA           | Neutral    | 0.524    | 0.278        | 0.199    |
| KCNA2 | 482 | C   | S   | NM_004974.4(KCNA2):c.1445G>C (p.Cys482Ser) | not provided                                                                                    | Uncertain significance(Last reviewed: Sep 19, 2019) | criteria provided, single submitter | VCV001312361 | 1                | 110603338      | 1312361     | 1301743     | NA           | Neutral    | 0.624    | 0.207        | 0.169    |
| KCNA2 | 489 | Y   | C   | NM_004974.4(KCNA2):c.1466A>G (p.Tyr489Cys) | Epileptic encephalopathy, early infantile, 32                                                   | Uncertain significance(Last reviewed: Mar 18, 2020) | criteria provided, single submitter | VCV000999752 | 1                | 110603317      | 999752      | 986793      | rs149776127  | Neutral    | 0.62     | 0.22         | 0.16     |
| KCNA2 | 499 | V   | A   | NM_004974.4(KCNA2):c.1496T>C (p.Val499Ala) | Intellectual disability Seizures                                                                | Uncertain significance(Last reviewed: Nov 18, 2019) | no assertion criteria provided      | VCV000977395 | 1                | 110603287      | 977395      | 965458      | rs1017816495 | Neutral    | 0.59     | 0.217        | 0.193    |
| KCNA4 | 89  | R   | Q   | NM_002233.4(KCNA4):c.266G>A (p.Arg89Gln)   | Microcephaly, cataracts, impaired intellectual development, and dystonia with abnormal striatum | Uncertain significance(Last reviewed: Sep 25, 2019) | criteria provided, single submitter | VCV000599408 | 11               | 30012413       | 599408      | 590745      | rs779101828  | LOF        | 0.822    | 0.084        | 0.094    |
| KCNA4 | 608 | K   | N   | NM_002233.4(KCNA4):c.1824G>C (p.Lys608Asn) | Microcephaly, cataracts, impaired intellectual development, and dystonia with abnormal striatum | Uncertain significance(Last reviewed: Sep 25, 2019) | criteria provided, single submitter | VCV001028009 | 11               | 30010855       | 1028009     | 1017444     | rs200225575  | Neutral    | 0.668    | 0.228        | 0.104    |
| KCNA5 | 1   | M   | V   | NM_002234.4(KCNA5):c.1A>G (p.Met1Val)      | Atrial fibrillation, familial, 7                                                                | Uncertain significance(Last reviewed: Nov 20, 2019) | criteria provided, single submitter | VCV000858451 | 12               | 5044148        | 858451      | 840004      | rs889711431  | Neutral    | 0.574    | 0.274        | 0.152    |
| KCNA5 | 5   | L   | P   | NM_002234.4(KCNA5):c.14T>C (p.Leu5Pro)     | Atrial fibrillation, familial, 7                                                                | Uncertain significance(Last reviewed: Jul 9, 2019)  | criteria provided, single submitter | VCV000960087 | 12               | 5044161        | 960087      | 948059      | rs1862740772 | Neutral    | 0.557    | 0.296        | 0.146    |
| KCNA5 | 10  | N   | D   | NM_002234.4(KCNA5):c.28A>G (p.Asn10Asp)    | Atrial fibrillation, familial, 7                                                                | Uncertain significance(Last reviewed: Oct 4, 2018)  | criteria provided, single submitter | VCV000662585 | 12               | 5044175        | 662585      | 641186      | rs894679405  | Neutral    | 0.524    | 0.256        | 0.221    |
| KCNA5 | 21  | E   | K   | NM_002234.4(KCNA5):c.61G>A (p.Glu21Lys)    | Atrial fibrillation, familial, 7                                                                | Uncertain significance(Last reviewed: Jul 2, 2020)  | criteria provided, single submitter | VCV001006528 | 12               | 5044208        | 1006528     | 995247      | rs1862741663 | Neutral    | 0.475    | 0.219        | 0.307    |
| KCNA5 | 23  | R   | Q   | NM_002234.4(KCNA5):c.68G>A (p.Arg23Gln)    | Atrial fibrillation, familial, 7                                                                | Uncertain significance(Last reviewed: Apr 11, 2020) | criteria provided, single submitter | VCV001001400 | 12               | 5044215        | 1001400     | 995248      | rs1197530568 | Neutral    | 0.529    | 0.214        | 0.257    |
| KCNA5 | 24  | A   | S   | NM_002234.4(KCNA5):c.70G>T (p.Ala24Ser)    | Atrial fibrillation, familial, 7                                                                | Uncertain                                           | criteria                            | VCV000957605 | 12               | 5044217        | 957605      | 948060      | rs1862741867 | Neutral    | 0.378    | 0.3          | 0.322    |

| gene  | pos | aa1 | aa2 | Name                                     | Condition(s)                                  | Clinical significance (Last reviewed)                                     | Review status                                        | Accession    | GRCh38Chromosome | GRCh38Location | VariationID | AlleleID(s) | dbSNP ID     | prediction | prob.LOF | prob.Neutral | prob.GOF |
|-------|-----|-----|-----|------------------------------------------|-----------------------------------------------|---------------------------------------------------------------------------|------------------------------------------------------|--------------|------------------|----------------|-------------|-------------|--------------|------------|----------|--------------|----------|
|       |     |     |     |                                          |                                               | significance(Last reviewed: Nov 5, 2019)                                  | provided, single submitter                           |              |                  |                |             |             |              |            |          |              |          |
| KCNA5 | 27  | G   | S   | NM_002234.4(KCNA5):c.79G>A (p.Gly27Ser)  | not provided Atrial fibrillation, familial, 7 | Conflicting interpretations of pathogenicity(Last reviewed: Nov 13, 2020) | criteria provided, conflicting interpretations       | VCV000469598 | 12               | 5044226        | 469598      | 462511      | rs201238766  | Neutral    | 0.406    | 0.308        | 0.286    |
| KCNA5 | 29  | A   | D   | NM_002234.4(KCNA5):c.86C>A (p.Ala29Asp)  | Atrial fibrillation, familial, 7              | Likely benign(Last reviewed: Nov 11, 2020)                                | criteria provided, single submitter                  | VCV000697538 | 12               | 5044233        | 697538      | 688005      | rs763281934  | Neutral    | 0.441    | 0.248        | 0.311    |
| KCNA5 | 31  | G   | A   | NM_002234.4(KCNA5):c.92G>C (p.Gly31Ala)  | not provided                                  | Uncertain significance(Last reviewed: Dec 13, 2018)                       | criteria provided, single submitter                  | VCV001207644 | 12               | 5044239        | 1207644     | 1198391     | NA           | Neutral    | 0.404    | 0.345        | 0.25     |
| KCNA5 | 31  | G   | R   | NM_002234.4(KCNA5):c.91G>C (p.Gly31Arg)  | Atrial fibrillation, familial, 7              | Uncertain significance(Last reviewed: Dec 19, 2019)                       | criteria provided, single submitter                  | VCV000855013 | 12               | 5044238        | 855013      | 840005      | rs1862742154 | Neutral    | 0.493    | 0.289        | 0.218    |
| KCNA5 | 31  | G   | V   | NM_002234.4(KCNA5):c.92G>T (p.Gly31Val)  | not provided Atrial fibrillation, familial, 7 | Benign/Likely benign(Last reviewed: Mar 2, 2021)                          | criteria provided, multiple submitters, no conflicts | VCV000309332 | 12               | 5044239        | 309332      | 317551      | rs61737395   | Neutral    | 0.416    | 0.363        | 0.221    |
| KCNA5 | 33  | E   | V   | NM_002234.4(KCNA5):c.98A>T (p.Glu33Val)  | Atrial fibrillation, familial, 7 not provided | Uncertain significance(Last reviewed: Oct 29, 2021)                       | criteria provided, multiple submitters, no conflicts | VCV000537313 | 12               | 5044245        | 537313      | 527200      | rs71584818   | Neutral    | 0.412    | 0.274        | 0.313    |
| KCNA5 | 36  | C   | S   | NM_002234.4(KCNA5):c.106T>A (p.Cys36Ser) | Atrial fibrillation, familial, 7              | Uncertain significance(Last reviewed: Jan 31, 2020)                       | criteria provided, single submitter                  | VCV000566847 | 12               | 5044253        | 566847      | 566861      | rs910072879  | Neutral    | 0.482    | 0.289        | 0.229    |
| KCNA5 | 39  | T   | P   | NM_002234.4(KCNA5):c.115A>C (p.Thr39Pro) | Atrial fibrillation, familial, 7              | Uncertain significance(Last reviewed: Aug 21, 2020)                       | criteria provided, single submitter                  | VCV000842980 | 12               | 5044262        | 842980      | 840006      | rs1299972539 | Neutral    | 0.439    | 0.254        | 0.307    |
| KCNA5 | 47  | K   | R   | NM_002234.4(KCNA5):c.140A>G (p.Lys47Arg) | Atrial fibrillation, familial, 7              | Uncertain significance(Last reviewed: Apr 20, 2020)                       | criteria provided, multiple submitters, no conflicts | VCV000309333 | 12               | 5044287        | 309333      | 317552      | rs886049573  | Neutral    | 0.573    | 0.187        | 0.24     |
| KCNA5 | 48  | E   | G   | NM_002234.4(KCNA5):c.143A>G (p.Glu48Gly) | Atrial fibrillation, familial, 7              | Pathogenic(Last reviewed: May 1, 2013)                                    | no assertion criteria provided                       | VCV000127137 | 12               | 5044290        | 127137      | 132635      | rs587777336  | GOF        | 0.43     | 0.108        | 0.462    |
| KCNA5 | 52  | K   | N   | NM_002234.4(KCNA5):c.156G>T (p.Lys52Asn) | Atrial fibrillation, familial, 7              | Uncertain significance(Last reviewed: Sep 16, 2019)                       | criteria provided, single submitter                  | VCV000957629 | 12               | 5044303        | 957629      | 948061      | rs768347248  | GOF        | 0.513    | 0.156        | 0.332    |
| KCNA5 | 63  | G   | V   | NM_002234.4(KCNA5):c.188G>T (p.Gly63Val) | Atrial fibrillation, familial, 7 not provided | Uncertain significance(Last reviewed: Jul 25, 2019)                       | criteria provided, multiple submitters, no conflicts | VCV000640925 | 12               | 5044335        | 640925      | 641187      | rs768062067  | Neutral    | 0.431    | 0.358        | 0.21     |
| KCNA5 | 66  | P   | S   | NM_002234.4(KCNA5):c.196C>T (p.Pro66Ser) | not provided Atrial fibrillation, familial, 7 | Uncertain significance(Last reviewed: Sep 9, 2020)                        | criteria provided, multiple submitters, no conflicts | VCV000665674 | 12               | 5044343        | 665674      | 641188      | rs368699451  | Neutral    | 0.41     | 0.297        | 0.293    |
| KCNA5 | 72  | D   | H   | NM_002234.4(KCNA5):c.214G>C (p.Asp72His) | Atrial fibrillation, familial, 7              | Uncertain significance(Last reviewed: Jan 30,                             | criteria provided, single submitter                  | VCV000945889 | 12               | 5044361        | 945889      | 926657      | rs758310507  | Neutral    | 0.445    | 0.233        | 0.322    |

| gene  | pos | aa1 | aa2 | Name                                               | Condition(s)                                  | Clinical significance (Last reviewed)                                     | Review status                                        | Accession    | GRCh38Chromosome | GRCh38Location    | VariationID | AlleleID(s) | dbSNP ID     | prediction | prob.LOF | prob.Neutral | prob.GOF |
|-------|-----|-----|-----|----------------------------------------------------|-----------------------------------------------|---------------------------------------------------------------------------|------------------------------------------------------|--------------|------------------|-------------------|-------------|-------------|--------------|------------|----------|--------------|----------|
|       |     |     |     |                                                    |                                               |                                                                           |                                                      |              |                  |                   |             |             |              |            |          |              |          |
| KCNA5 | 74  | G   | E   | NM_002234.4(KCNA5):c.221G>A (p.Gly74Glu)           | Atrial fibrillation, familial, 7              | Likely benign(Last reviewed: Sep 30, 2020)                                | criteria provided, single submitter                  | VCV000537319 | 12               | 5044368           | 537319      | 527208      | rs555008698  | Neutral    | 0.485    | 0.298        | 0.217    |
| KCNA5 | 76  | R   | L   | NM_002234.4(KCNA5):c.227G>T (p.Arg76Leu)           | Atrial fibrillation, familial, 7              | Uncertain significance(Last reviewed: Sep 25, 2020)                       | criteria provided, single submitter                  | VCV001061754 | 12               | 5044374           | 1061754     | 1047998     | NA           | Neutral    | 0.475    | 0.308        | 0.218    |
| KCNA5 | 77  | P   | R   | NM_002234.4(KCNA5):c.230C>G (p.Pro77Arg)           | Atrial fibrillation, familial, 7              | Uncertain significance(Last reviewed: Feb 5, 2019)                        | criteria provided, single submitter                  | VCV000653091 | 12               | 5044377           | 653091      | 641189      | rs1003591437 | Neutral    | 0.468    | 0.336        | 0.196    |
| KCNA5 | 77  | P   | S   | NM_002234.4(KCNA5):c.229C>T (p.Pro77Ser)           | not provided Atrial fibrillation, familial, 7 | Benign/Likely benign(Last reviewed: Apr 15, 2021)                         | criteria provided, multiple submitters, no conflicts | VCV000469590 | 12               | 5044376           | 469590      | 462519      | rs202083721  | Neutral    | 0.404    | 0.354        | 0.242    |
| KCNA5 | 84  | E   | A   | NM_002234.4(KCNA5):c.251A>C (p.Glu84Ala)           | Atrial fibrillation, familial, 7 not provided | Conflicting interpretations of pathogenicity(Last reviewed: May 12, 2020) | criteria provided, conflicting interpretations       | VCV000191456 | 12               | 5044398           | 191456      | 189345      | rs377036305  | GOF        | 0.427    | 0.188        | 0.385    |
| KCNA5 | 87  | R   | Q   | NM_002234.4(KCNA5):c.260G>A (p.Arg87Gln)           | Atrial fibrillation, familial, 7 not provided | Uncertain significance(Last reviewed: Jan 14, 2022)                       | criteria provided, multiple submitters, no conflicts | VCV000565628 | 12               | 5044407           | 565628      | 566866      | rs71537801   | Neutral    | 0.54     | 0.221        | 0.239    |
| KCNA5 | 90  | R   | W   | NM_002234.4(KCNA5):c.268C>T (p.Arg90Trp)           | Atrial fibrillation, familial, 7              | Uncertain significance(Last reviewed: Mar 23, 2018)                       | criteria provided, single submitter                  | VCV000883692 | 12               | 5044415           | 883692      | 870026      | rs764215137  | Neutral    | 0.556    | 0.233        | 0.211    |
| KCNA5 | 116 | S   | F   | NM_002234.4(KCNA5):c.347C>T (p.Ser116Phe)          | Atrial fibrillation, familial, 7              | Uncertain significance(Last reviewed: Sep 3, 2019)                        | criteria provided, single submitter                  | VCV000955024 | 12               | 5044494           | 955024      | 948062      | rs962908688  | Neutral    | 0.388    | 0.43         | 0.182    |
| KCNA5 | 127 | S   | F   | NM_002234.4(KCNA5):c.380_381delinsTT (p.Ser127Phe) | not provided                                  | Uncertain significance(Last reviewed: Sep 20, 2019)                       | criteria provided, single submitter                  | VCV001302378 | 12               | 5044527 - 5044528 | 1302378     | 1292659     | NA           | Neutral    | 0.687    | 0.199        | 0.114    |
| KCNA5 | 128 | G   | R   | NM_002234.4(KCNA5):c.382G>C (p.Gly128Arg)          | Atrial fibrillation, familial, 7              | Uncertain significance(Last reviewed: Jul 6, 2017)                        | criteria provided, single submitter                  | VCV000469593 | 12               | 5044529           | 469593      | 463140      | rs766137868  | LOF        | 0.795    | 0.113        | 0.092    |
| KCNA5 | 130 | R   | H   | NM_002234.4(KCNA5):c.389G>A (p.Arg130His)          | Atrial fibrillation, familial, 7              | Uncertain significance(Last reviewed: Apr 27, 2017)                       | criteria provided, single submitter                  | VCV000881348 | 12               | 5044536           | 881348      | 870027      | rs751342646  | LOF        | 0.795    | 0.128        | 0.076    |
| KCNA5 | 139 | A   | E   | NM_002234.4(KCNA5):c.416C>A (p.Ala139Glu)          | Atrial fibrillation, familial, 7              | Uncertain significance(Last reviewed: Aug 27, 2019)                       | criteria provided, single submitter                  | VCV000961260 | 12               | 5044563           | 961260      | 948063      | rs1351785009 | Neutral    | 0.623    | 0.211        | 0.166    |
| KCNA5 | 148 | D   | N   | NM_002234.4(KCNA5):c.442G>A (p.Asp148Asn)          | Atrial fibrillation, familial, 7 not provided | Uncertain significance(Last reviewed: Jun 25, 2021)                       | criteria provided, multiple submitters, no conflicts | VCV000958518 | 12               | 5044589           | 958518      | 948064      | rs773318785  | LOF        | 0.629    | 0.16         | 0.211    |
| KCNA5 | 150 | A   | V   | NM_002234.4(KCNA5):c.449C>T (p.Ala150Val)          | Atrial fibrillation, familial, 7              | Uncertain significance(Last reviewed: Oct 7, 2019)                        | criteria provided, single submitter                  | VCV000930576 | 12               | 5044596           | 930576      | 919448      | rs1862749143 | LOF        | 0.756    | 0.157        | 0.086    |
| KCNA5 | 154 | R   | S   | NM_002234.4(KCNA5):c.460C>A (p.Arg154Ser)          | not provided                                  | Uncertain significance(Last reviewed: Sep 20, 2019)                       | criteria provided, single submitter                  | VCV000499403 | 12               | 5044607           | 499403      | 490827      | rs756977657  | LOF        | 0.803    | 0.119        | 0.079    |

| gene  | pos | aa1 | aa2 | Name                                               | Condition(s)                                  | Clinical significance (Last reviewed)                                     | Review status                                        | Accession    | GRCh38Chromosome | GRCh38Location    | VariationID | AlleleID(s) | dbSNP ID     | prediction | prob.LOF | prob.Neutral | prob.GOF |
|-------|-----|-----|-----|----------------------------------------------------|-----------------------------------------------|---------------------------------------------------------------------------|------------------------------------------------------|--------------|------------------|-------------------|-------------|-------------|--------------|------------|----------|--------------|----------|
|       |     |     |     |                                                    |                                               | reviewed: Jan 16, 2017)                                                   | submitter                                            |              |                  |                   |             |             |              |            |          |              |          |
| KCNA5 | 154 | R   | S   | NM_002234.4(KCNA5):c.460C>A (p.Arg154Ser)          | not provided                                  | Uncertain significance(Last reviewed: Jan 16, 2017)                       | criteria provided, single submitter                  | VCV000499403 | 12               | 5044607           | 499403      | 490827      | rs756977657  | LOF        | 0.803    | 0.119        | 0.079    |
| KCNA5 | 154 | R   | S   | NM_002234.4(KCNA5):c.459_460delinsAA (p.Arg154Ser) | Atrial fibrillation, familial, 7              | Uncertain significance(Last reviewed: Jan 26, 2019)                       | criteria provided, single submitter                  | VCV000849518 | 12               | 5044606 - 5044607 | 849518      | 840008      | rs1862749418 | LOF        | 0.803    | 0.119        | 0.079    |
| KCNA5 | 154 | R   | S   | NM_002234.4(KCNA5):c.459_460delinsAA (p.Arg154Ser) | Atrial fibrillation, familial, 7              | Uncertain significance(Last reviewed: Jan 26, 2019)                       | criteria provided, single submitter                  | VCV000849518 | 12               | 5044606 - 5044607 | 849518      | 840008      | rs1862749418 | LOF        | 0.803    | 0.119        | 0.079    |
| KCNA5 | 155 | Y   | C   | NM_002234.4(KCNA5):c.464A>G (p.Tyr155Cys)          | Atrial fibrillation, familial, 7 not provided | Conflicting interpretations of pathogenicity(Last reviewed: May 28, 2019) | criteria provided, conflicting interpretations       | VCV000191457 | 12               | 5044611           | 191457      | 189346      | rs202117321  | LOF        | 0.855    | 0.053        | 0.092    |
| KCNA5 | 157 | D   | E   | NM_002234.4(KCNA5):c.471C>G (p.Asp157Glu)          | Atrial fibrillation, familial, 7              | Uncertain significance(Last reviewed: Aug 31, 2020)                       | criteria provided, single submitter                  | VCV001004369 | 12               | 5044618           | 1004369     | 995249      | rs200395850  | LOF        | 0.793    | 0.127        | 0.08     |
| KCNA5 | 166 | D   | A   | NM_002234.4(KCNA5):c.497A>C (p.Asp166Ala)          | Atrial fibrillation, familial, 7 not provided | Uncertain significance(Last reviewed: Dec 19, 2019)                       | criteria provided, multiple submitters, no conflicts | VCV000537306 | 12               | 5044644           | 537306      | 527454      | rs748629738  | LOF        | 0.687    | 0.128        | 0.185    |
| KCNA5 | 174 | G   | A   | NM_002234.4(KCNA5):c.521_522delinsCC (p.Gly174Ala) | Atrial fibrillation, familial, 7              | Uncertain significance(Last reviewed: Feb 26, 2018)                       | criteria provided, single submitter                  | VCV000572604 | 12               | 5044668 - 5044669 | 572604      | 568088      | rs1565465275 | Neutral    | 0.671    | 0.205        | 0.124    |
| KCNA5 | 181 | S   | Y   | NM_002234.4(KCNA5):c.542C>A (p.Ser181Tyr)          | not provided                                  | Uncertain significance(Last reviewed: Feb 10, 2020)                       | criteria provided, single submitter                  | VCV001314974 | 12               | 5044689           | 1314974     | 1305235     | NA           | LOF        | 0.683    | 0.145        | 0.171    |
| KCNA5 | 182 | G   | R   | NM_002234.4(KCNA5):c.544G>A (p.Gly182Arg)          | not provided Atrial fibrillation, familial, 7 | Conflicting interpretations of pathogenicity(Last reviewed: Nov 5, 2020)  | criteria provided, conflicting interpretations       | VCV000469594 | 12               | 5044691           | 469594      | 463145      | rs755408841  | LOF        | 0.816    | 0.085        | 0.1      |
| KCNA5 | 184 | R   | H   | NM_002234.4(KCNA5):c.551G>A (p.Arg184His)          | not provided                                  | Uncertain significance(Last reviewed: Jun 24, 2013)                       | criteria provided, single submitter                  | VCV000191458 | 12               | 5044698           | 191458      | 189347      | rs375080039  | LOF        | 0.678    | 0.138        | 0.184    |
| KCNA5 | 187 | R   | K   | NM_002234.4(KCNA5):c.560G>A (p.Arg187Lys)          | Atrial fibrillation, familial, 7              | Uncertain significance(Last reviewed: Feb 17, 2020)                       | criteria provided, single submitter                  | VCV000968432 | 12               | 5044707           | 968432      | 956896      | rs1862751394 | LOF        | 0.732    | 0.11         | 0.158    |
| KCNA5 | 188 | P   | A   | NM_002234.4(KCNA5):c.562C>G (p.Pro188Ala)          | not provided                                  | Uncertain significance(Last reviewed: Nov 1, 2018)                        | criteria provided, single submitter                  | VCV000806778 | 12               | 5044709           | 806778      | 796786      | rs907032325  | Neutral    | 0.696    | 0.166        | 0.138    |
| KCNA5 | 190 | N   | K   | NM_002234.4(KCNA5):c.570C>G (p.Asn190Lys)          | Atrial fibrillation, familial, 7              | Uncertain significance(Last reviewed: Apr 1, 2019)                        | criteria provided, single submitter                  | VCV000844475 | 12               | 5044717           | 844475      | 840009      | rs12720444   | LOF        | 0.754    | 0.106        | 0.14     |
| KCNA5 | 201 | R   | C   | NM_002234.4(KCNA5):c.601C>T (p.Arg201Cys)          | not provided                                  | Uncertain significance(Last reviewed: Jun 1, 2018)                        | criteria provided, single submitter                  | VCV000806779 | 12               | 5044748           | 806779      | 796787      | rs764783669  | Neutral    | 0.606    | 0.254        | 0.14     |

| gene  | pos | aa1 | aa2 | Name                                      | Condition(s)                                                                     | Clinical significance (Last reviewed)                                     | Review status                                        | Accession    | GRCh38Chromosome | GRCh38Location | VariationID | AlleleID(s) | dbSNP ID     | prediction | prob.LOF | prob.Neutral | prob.GOF |
|-------|-----|-----|-----|-------------------------------------------|----------------------------------------------------------------------------------|---------------------------------------------------------------------------|------------------------------------------------------|--------------|------------------|----------------|-------------|-------------|--------------|------------|----------|--------------|----------|
| KCNA5 | 201 | R   | H   | NM_002234.4(KCNA5):c.602G>A (p.Arg201His) | Atrial fibrillation, familial, 7                                                 | Uncertain significance(Last reviewed: Jan 13, 2018)                       | criteria provided, single submitter                  | VCV000881350 | 12               | 5044749        | 881350      | 870029      | rs765380398  | LOF        | 0.702    | 0.137        | 0.161    |
| KCNA5 | 206 | G   | A   | NM_002234.4(KCNA5):c.617G>C (p.Gly206Ala) | Atrial fibrillation, familial, 7                                                 | Uncertain significance(Last reviewed: May 6, 2020)                        | criteria provided, single submitter                  | VCV001011111 | 12               | 5044764        | 1011111     | 995250      | rs200813950  | Neutral    | 0.599    | 0.22         | 0.181    |
| KCNA5 | 207 | D   | N   | NM_002234.4(KCNA5):c.619G>A (p.Asp207Asn) | Atrial fibrillation, familial, 7                                                 | Uncertain significance(Last reviewed: Apr 18, 2019)                       | criteria provided, single submitter                  | VCV000840414 | 12               | 5044766        | 840414      | 840010      | rs757340322  | Neutral    | 0.664    | 0.15         | 0.186    |
| KCNA5 | 210 | M   | T   | NM_002234.4(KCNA5):c.629T>C (p.Met210Thr) | Atrial fibrillation, familial, 7                                                 | Uncertain significance(Last reviewed: Aug 31, 2019)                       | criteria provided, single submitter                  | VCV000658568 | 12               | 5044776        | 658568      | 641191      | rs1228879118 | Neutral    | 0.527    | 0.319        | 0.154    |
| KCNA5 | 211 | E   | D   | NM_002234.4(KCNA5):c.633G>C (p.Glu211Asp) | Atrial fibrillation, familial, 7 not specified  Primary pulmonary hypertension 1 | Conflicting interpretations of pathogenicity(Last reviewed: Dec 6, 2020)  | criteria provided, conflicting interpretations       | VCV000191459 | 12               | 5044780        | 191459      | 189348      | rs35853292   | Neutral    | 0.669    | 0.173        | 0.158    |
| KCNA5 | 211 | E   | Q   | NM_002234.4(KCNA5):c.631G>C (p.Glu211Gln) | Atrial fibrillation, familial, 7                                                 | Uncertain significance(Last reviewed: Aug 26, 2020)                       | criteria provided, single submitter                  | VCV001010338 | 12               | 5044778        | 1010338     | 995251      | rs1862753153 | Neutral    | 0.661    | 0.174        | 0.165    |
| KCNA5 | 212 | R   | C   | NM_002234.4(KCNA5):c.634C>T (p.Arg212Cys) | Atrial fibrillation, familial, 7 not provided                                    | Conflicting interpretations of pathogenicity(Last reviewed: Nov 25, 2020) | criteria provided, conflicting interpretations       | VCV000191460 | 12               | 5044781        | 191460      | 189349      | rs77281462   | Neutral    | 0.55     | 0.313        | 0.137    |
| KCNA5 | 214 | R   | C   | NM_002234.4(KCNA5):c.640C>T (p.Arg214Cys) | Atrial fibrillation, familial, 7 not provided                                    | Uncertain significance(Last reviewed: Jan 11, 2021)                       | criteria provided, multiple submitters, no conflicts | VCV000661693 | 12               | 5044787        | 661693      | 641192      | rs3197074    | Neutral    | 0.609    | 0.257        | 0.134    |
| KCNA5 | 223 | E   | K   | NM_002234.4(KCNA5):c.667G>A (p.Glu223Lys) | Atrial fibrillation, familial, 7                                                 | Uncertain significance(Last reviewed: Oct 25, 2018)                       | criteria provided, single submitter                  | VCV000537307 | 12               | 5044814        | 537307      | 527216      | rs367992628  | Neutral    | 0.673    | 0.156        | 0.172    |
| KCNA5 | 230 | N   | H   | NM_002234.4(KCNA5):c.688A>C (p.Asn230His) | Atrial fibrillation, familial, 7                                                 | Uncertain significance(Last reviewed: Aug 30, 2020)                       | criteria provided, single submitter                  | VCV001035260 | 12               | 5044835        | 1035260     | 1030987     | rs1283845498 | LOF        | 0.659    | 0.121        | 0.22     |
| KCNA5 | 230 | N   | S   | NM_002234.4(KCNA5):c.689A>G (p.Asn230Ser) | Atrial fibrillation, familial, 7                                                 | Uncertain significance(Last reviewed: May 27, 2020)                       | criteria provided, single submitter                  | VCV001042694 | 12               | 5044836        | 1042694     | 1030988     | rs1431311668 | LOF        | 0.652    | 0.132        | 0.216    |
| KCNA5 | 234 | R   | L   | NM_002234.4(KCNA5):c.701G>T (p.Arg234Leu) | Atrial fibrillation, familial, 7 not provided                                    | Uncertain significance(Last reviewed: Oct 8, 2020)                        | criteria provided, multiple submitters, no conflicts | VCV000191461 | 12               | 5044848        | 191461      | 189350      | rs371521698  | Neutral    | 0.631    | 0.199        | 0.17     |
| KCNA5 | 234 | R   | S   | NM_002234.4(KCNA5):c.700C>A (p.Arg234Ser) | Atrial fibrillation, familial, 7                                                 | Uncertain significance(Last reviewed: Feb 14, 2020)                       | criteria provided, single submitter                  | VCV001034629 | 12               | 5044847        | 1034629     | 1030989     | rs747919632  | LOF        | 0.732    | 0.105        | 0.164    |
| KCNA5 | 235 | Q   | H   | NM_002234.4(KCNA5):c.705G>T (p.Gln235His) | Atrial fibrillation, familial, 7                                                 | Uncertain significance(Last reviewed: Jan 21, 2020)                       | criteria provided, single submitter                  | VCV000855542 | 12               | 5044852        | 855542      | 840011      | rs773235814  | LOF        | 0.701    | 0.112        | 0.187    |
| KCNA5 | 236 | V   | M   | NM_002234.4(KCNA5):c.706G>A (p.Val236Met) | Atrial fibrillation, familial, 7                                                 | Uncertain significance(Last reviewed: Jan 21, 2020)                       | criteria provided, single submitter                  | VCV000638821 | 12               | 5044853        | 638821      | 641193      | rs762579966  | Neutral    | 0.498    | 0.357        | 0.145    |

| gene  | pos | aa1 | aa2 | Name                                               | Condition(s)                                                | Clinical significance (Last reviewed)                                    | Review status                                        | Accession    | GRCh38Chromosome | GRCh38Location    | VariationID | AlleleID(s) | dbSNP ID     | prediction | prob.LOF | prob.Neutral | prob.GOF |
|-------|-----|-----|-----|----------------------------------------------------|-------------------------------------------------------------|--------------------------------------------------------------------------|------------------------------------------------------|--------------|------------------|-------------------|-------------|-------------|--------------|------------|----------|--------------|----------|
|       |     |     |     |                                                    |                                                             | reviewed: Aug 7, 2018)                                                   | submitter                                            |              |                  |                   |             |             |              |            |          |              |          |
| KCNA5 | 251 | A   | T   | NM_002234.4(KCNA5):c.751G>A (p.Ala251Thr)          | not specified not provided Atrial fibrillation, familial, 7 | Benign/Likely benign(Last reviewed: Dec 8, 2020)                         | criteria provided, multiple submitters, no conflicts | VCV000191570 | 12               | 5044898           | 191570      | 189351      | rs12720442   | Neutral    | 0.485    | 0.403        | 0.111    |
| KCNA5 | 252 | I   | L   | NM_002234.4(KCNA5):c.754A>C (p.Ile252Leu)          | not provided                                                | Uncertain significance(Last reviewed: Jun 13, 2019)                      | criteria provided, single submitter                  | VCV001306517 | 12               | 5044901           | 1306517     | 1296460     | NA           | Neutral    | 0.453    | 0.471        | 0.076    |
| KCNA5 | 252 | I   | V   | NM_002234.4(KCNA5):c.754A>G (p.Ile252Val)          | Atrial fibrillation, familial, 7                            | Uncertain significance(Last reviewed: Sep 26, 2016)                      | criteria provided, single submitter                  | VCV000469597 | 12               | 5044901           | 469597      | 462525      | rs1555100234 | Neutral    | 0.441    | 0.485        | 0.074    |
| KCNA5 | 253 | A   | T   | NM_002234.4(KCNA5):c.757G>A (p.Ala253Thr)          | Atrial fibrillation, familial, 7                            | Uncertain significance(Last reviewed: Feb 24, 2020)                      | criteria provided, single submitter                  | VCV000842461 | 12               | 5044904           | 842461      | 840012      | rs1343401682 | Neutral    | 0.571    | 0.345        | 0.085    |
| KCNA5 | 257 | V   | A   | NM_002234.4(KCNA5):c.770T>C (p.Val257Ala)          | Atrial fibrillation, familial, 7                            | Uncertain significance(Last reviewed: May 11, 2020)                      | criteria provided, single submitter                  | VCV000998896 | 12               | 5044917           | 998896      | 995252      | rs1565465513 | Neutral    | 0.576    | 0.367        | 0.057    |
| KCNA5 | 259 | V   | F   | NM_002234.4(KCNA5):c.775G>T (p.Val259Phe)          | Atrial fibrillation, familial, 7                            | Uncertain significance(Last reviewed: Sep 30, 2020)                      | criteria provided, single submitter                  | VCV000574748 | 12               | 5044922           | 574748      | 566871      | rs528511896  | Neutral    | 0.599    | 0.323        | 0.078    |
| KCNA5 | 260 | I   | F   | NM_002234.4(KCNA5):c.778A>T (p.Ile260Phe)          | not provided                                                | Uncertain significance(Last reviewed: May 24, 2019)                      | criteria provided, single submitter                  | VCV001305998 | 12               | 5044925           | 1305998     | 1297269     | NA           | Neutral    | 0.644    | 0.302        | 0.055    |
| KCNA5 | 266 | T   | I   | NM_002234.4(KCNA5):c.797C>T (p.Thr266Ile)          | Atrial fibrillation, familial, 7 not provided               | Conflicting interpretations of pathogenicity(Last reviewed: Aug 6, 2020) | criteria provided, conflicting interpretations       | VCV000579528 | 12               | 5044944           | 579528      | 568090      | rs369750762  | Neutral    | 0.606    | 0.3          | 0.094    |
| KCNA5 | 275 | F   | S   | NM_002234.4(KCNA5):c.824T>C (p.Phe275Ser)          | Atrial fibrillation, familial, 7                            | Uncertain significance(Last reviewed: Aug 2, 2019)                       | criteria provided, single submitter                  | VCV000953579 | 12               | 5044971           | 953579      | 948065      | rs1183786437 | Neutral    | 0.625    | 0.226        | 0.149    |
| KCNA5 | 276 | R   | K   | NM_002234.4(KCNA5):c.827G>A (p.Arg276Lys)          | Atrial fibrillation, familial, 7                            | Uncertain significance(Last reviewed: Aug 17, 2019)                      | criteria provided, single submitter                  | VCV000943244 | 12               | 5044974           | 943244      | 936149      | rs762170694  | LOF        | 0.722    | 0.091        | 0.187    |
| KCNA5 | 283 | R   | C   | NM_002234.4(KCNA5):c.847C>T (p.Arg283Cys)          | Atrial fibrillation, familial, 7                            | Uncertain significance(Last reviewed: Aug 23, 2019)                      | criteria provided, multiple submitters, no conflicts | VCV000309337 | 12               | 5044994           | 309337      | 331616      | rs886049575  | Neutral    | 0.47     | 0.353        | 0.176    |
| KCNA5 | 283 | R   | H   | NM_002234.4(KCNA5):c.848G>A (p.Arg283His)          | Atrial fibrillation, familial, 7                            | Uncertain significance(Last reviewed: Jun 28, 2017)                      | criteria provided, single submitter                  | VCV000469599 | 12               | 5044995           | 469599      | 463016      | rs1020769441 | Neutral    | 0.505    | 0.294        | 0.202    |
| KCNA5 | 285 | P   | A   | NM_002234.4(KCNA5):c.853C>G (p.Pro285Ala)          | Atrial fibrillation, familial, 7                            | Uncertain significance(Last reviewed: May 24, 2019)                      | criteria provided, single submitter                  | VCV000834438 | 12               | 5045000           | 834438      | 840013      | rs1862757483 | Neutral    | 0.371    | 0.455        | 0.174    |
| KCNA5 | 287 | A   | L   | NM_002234.4(KCNA5):c.859_860delinsTT (p.Ala287Leu) | Atrial fibrillation, familial, 7 not provided               | Uncertain significance(Last reviewed: Oct 30, 2020)                      | criteria provided, multiple submitters, no conflicts | VCV000596455 | 12               | 5045006 - 5045007 | 596455      | 587516      | rs1565465582 | Neutral    | 0.392    | 0.401        | 0.208    |

| gene  | pos | aa1 | aa2 | Name                                               | Condition(s)                                                                                   | Clinical significance (Last reviewed)                                     | Review status                                        | Accession    | GRCh38Chromosome | GRCh38Location    | VariationID | AlleleID(s) | dbSNP ID     | prediction | prob.LOF | prob.Neutral | prob.GOF |
|-------|-----|-----|-----|----------------------------------------------------|------------------------------------------------------------------------------------------------|---------------------------------------------------------------------------|------------------------------------------------------|--------------|------------------|-------------------|-------------|-------------|--------------|------------|----------|--------------|----------|
| KCNA5 | 287 | A   | S   | NM_002234.4(KCNA5):c.859G>T (p.Ala287Ser)          | Atrial fibrillation, familial, 7                                                               | Likely benign(Last reviewed: Dec 31, 2019)                                | criteria provided, single submitter                  | VCV000723488 | 12               | 5045006           | 723488      | 738695      | rs149582940  | Neutral    | 0.389    | 0.336        | 0.275    |
| KCNA5 | 287 | A   | V   | NM_002234.4(KCNA5):c.860C>T (p.Ala287Val)          | Atrial fibrillation, familial, 7                                                               | Likely benign(Last reviewed: Dec 31, 2019)                                | criteria provided, single submitter                  | VCV000723489 | 12               | 5045007           | 723489      | 738696      | rs144246051  | Neutral    | 0.379    | 0.389        | 0.232    |
| KCNA5 | 293 | A   | T   | NM_002234.4(KCNA5):c.877G>A (p.Ala293Thr)          | Atrial fibrillation, familial, 7                                                               | Uncertain significance(Last reviewed: Sep 13, 2017)                       | criteria provided, single submitter                  | VCV000537310 | 12               | 5045024           | 537310      | 527460      | rs898525645  | Neutral    | 0.366    | 0.35         | 0.284    |
| KCNA5 | 296 | P   | S   | NM_002234.4(KCNA5):c.886C>T (p.Pro296Ser)          | Atrial fibrillation, familial, 7                                                               | Uncertain significance(Last reviewed: Jun 15, 2020)                       | criteria provided, single submitter                  | VCV001034637 | 12               | 5045033           | 1034637     | 1030990     | rs1172777549 | Neutral    | 0.376    | 0.434        | 0.189    |
| KCNA5 | 299 | N   | K   | NM_002234.4(KCNA5):c.897C>G (p.Asn299Lys)          | Atrial fibrillation, familial, 7                                                               | Uncertain significance(Last reviewed: Sep 17, 2020)                       | criteria provided, single submitter                  | VCV001051622 | 12               | 5045044           | 1051622     | 1048000     | NA           | Neutral    | 0.533    | 0.263        | 0.204    |
| KCNA5 | 300 | G   | C   | NM_002234.4(KCNA5):c.898G>T (p.Gly300Cys)          | Atrial fibrillation, familial, 7                                                               | Uncertain significance(Last reviewed: Dec 8, 2016)                        | criteria provided, single submitter                  | VCV000469601 | 12               | 5045045           | 469601      | 462286      | rs148708451  | Neutral    | 0.407    | 0.423        | 0.17     |
| KCNA5 | 300 | G   | S   | NM_002234.4(KCNA5):c.898G>A (p.Gly300Ser)          | Atrial fibrillation, familial, 7 not provided                                                  | Conflicting interpretations of pathogenicity(Last reviewed: Sep 22, 2020) | criteria provided, conflicting interpretations       | VCV000191462 | 12               | 5045045           | 191462      | 189352      | rs148708451  | Neutral    | 0.414    | 0.371        | 0.216    |
| KCNA5 | 302 | G   | Q   | NM_002234.4(KCNA5):c.904_905delinsCA (p.Gly302Gln) | Atrial fibrillation, familial, 7                                                               | Uncertain significance(Last reviewed: Dec 27, 2019)                       | criteria provided, single submitter                  | VCV000859386 | 12               | 5045051 - 5045052 | 859386      | 840014      | rs1862758690 | Neutral    | 0.44     | 0.33         | 0.23     |
| KCNA5 | 304 | M   | T   | NM_002234.4(KCNA5):c.911T>C (p.Met304Thr)          | Atrial fibrillation, familial, 7                                                               | Uncertain significance(Last reviewed: May 12, 2019)                       | criteria provided, single submitter                  | VCV000469602 | 12               | 5045058           | 469602      | 462528      | rs745760298  | Neutral    | 0.386    | 0.338        | 0.276    |
| KCNA5 | 305 | A   | T   | NM_002234.4(KCNA5):c.913G>A (p.Ala305Thr)          | not provided Atrial fibrillation, familial, 7                                                  | Uncertain significance(Last reviewed: Mar 18, 2020)                       | criteria provided, multiple submitters, no conflicts | VCV000127136 | 12               | 5045060           | 127136      | 132634      | rs199794307  | Neutral    | 0.353    | 0.311        | 0.336    |
| KCNA5 | 306 | P   | Q   | NM_002234.4(KCNA5):c.917C>A (p.Pro306Gln)          | Atrial fibrillation, familial, 7                                                               | Uncertain significance(Last reviewed: Aug 17, 2020)                       | criteria provided, single submitter                  | VCV001005634 | 12               | 5045064           | 1005634     | 995253      | rs527534559  | Neutral    | 0.447    | 0.367        | 0.187    |
| KCNA5 | 307 | P   | S   | NM_002234.4(KCNA5):c.919C>T (p.Pro307Ser)          | Atrial fibrillation, familial, 7 not specified not provided altered potassium channel function | Conflicting interpretations of pathogenicity(Last reviewed: Dec 29, 2020) | criteria provided, conflicting interpretations       | VCV000191463 | 12               | 5045066           | 191463      | 189353      | rs17215409   | Neutral    | 0.424    | 0.395        | 0.181    |
| KCNA5 | 309 | G   | D   | NM_002234.4(KCNA5):c.926G>A (p.Gly309Asp)          | Atrial fibrillation, familial, 7 not provided                                                  | Uncertain significance(Last reviewed: Jul 25, 2020)                       | criteria provided, multiple submitters, no conflicts | VCV000852918 | 12               | 5045073           | 852918      | 840015      | rs369120527  | Neutral    | 0.523    | 0.249        | 0.227    |
| KCNA5 | 310 | P   | L   | NM_002234.4(KCNA5):c.929C>T (p.Pro310Leu)          | not provided Atrial fibrillation, familial, 7 not specified                                    | Benign/Likely benign(Last reviewed: Jan 12, 2021)                         | criteria provided, multiple submitters, no conflicts | VCV000191571 | 12               | 5045076           | 191571      | 189354      | rs17215402   | Neutral    | 0.445    | 0.397        | 0.158    |
| KCNA5 | 321 | A   | T   | NM_002234.4(KCNA5):c.961G>A (p.Ala321Thr)          | Atrial fibrillation, familial, 7 not provided                                                  | Likely benign(Last reviewed: Aug 6, 2020)                                 | criteria provided, single submitter                  | VCV000537314 | 12               | 5045108           | 537314      | 527754      | rs765142607  | GOF        | 0.573    | 0.124        | 0.303    |



| gene  | pos | aa1 | aa2 | Name                                            | Condition(s)                                                | Clinical significance (Last reviewed)               | Review status                                        | Accession    | GRCh38Chromosome | GRCh38Location    | VariationID | AlleleID(s) | dbSNP ID     | prediction | prob.LOF | prob.Neutral | prob.GOF |
|-------|-----|-----|-----|-------------------------------------------------|-------------------------------------------------------------|-----------------------------------------------------|------------------------------------------------------|--------------|------------------|-------------------|-------------|-------------|--------------|------------|----------|--------------|----------|
| KCNA5 | 321 | A   | V   | NM_002234.4(KCNA5):c.962C>T (p.Ala321Val)       | Atrial fibrillation, familial, 7                            | Uncertain significance(Last reviewed: Jun 4, 2020)  | criteria provided, single submitter                  | VCV001015513 | 12               | 5045109           | 1015513     | 1010477     | rs529780345  | GOF        | 0.53     | 0.192        | 0.278    |
| KCNA5 | 322 | D   | E   | NM_002234.4(KCNA5):c.966C>G (p.Asp322Glu)       | not provided                                                | Uncertain significance(Last reviewed: Jun 24, 2013) | criteria provided, single submitter                  | VCV000191464 | 12               | 5045113           | 191464      | 189355      | rs199525305  | LOF        | 0.715    | 0.058        | 0.227    |
| KCNA5 | 322 | D   | H   | NM_002234.4(KCNA5):c.964G>C (p.Asp322His)       | Atrial fibrillation, familial, 7                            | Uncertain significance(Last reviewed: Apr 18, 2017) | criteria provided, single submitter                  | VCV000469603 | 12               | 5045111           | 469603      | 463153      | rs139614200  | GOF        | 0.645    | 0.065        | 0.29     |
| KCNA5 | 322 | D   | N   | NM_002234.4(KCNA5):c.964G>A (p.Asp322Asn)       | Atrial fibrillation, familial, 7                            | Uncertain significance(Last reviewed: Dec 26, 2019) | criteria provided, single submitter                  | VCV000836547 | 12               | 5045111           | 836547      | 840016      | rs139614200  | GOF        | 0.693    | 0.058        | 0.249    |
| KCNA5 | 323 | P   | R   | NM_002234.4(KCNA5):c.968C>G (p.Pro323Arg)       | Atrial fibrillation, familial, 7                            | Uncertain significance(Last reviewed: May 27, 2020) | criteria provided, single submitter                  | VCV001042033 | 12               | 5045115           | 1042033     | 1030991     | rs1333918540 | LOF        | 0.787    | 0.069        | 0.143    |
| KCNA5 | 323 | P   | S   | NM_002234.4(KCNA5):c.967C>T (p.Pro323Ser)       | not provided                                                | Uncertain significance(Last reviewed: Dec 8, 2016)  | criteria provided, single submitter                  | VCV000498922 | 12               | 5045114           | 498922      | 490346      | rs376977376  | LOF        | 0.768    | 0.081        | 0.151    |
| KCNA5 | 347 | P   | S   | NM_002234.4(KCNA5):c.1039C>T (p.Pro347Ser)      | Atrial fibrillation, familial, 7                            | Uncertain significance(Last reviewed: Oct 3, 2019)  | criteria provided, single submitter                  | VCV000469581 | 12               | 5045186           | 469581      | 463158      | rs752143941  | LOF        | 0.838    | 0.098        | 0.064    |
| KCNA5 | 348 | S   | N   | NM_002234.4(KCNA5):c.1043G>A (p.Ser348Asn)      | Atrial fibrillation, familial, 7                            | Uncertain significance(Last reviewed: May 6, 2020)  | criteria provided, single submitter                  | VCV001024450 | 12               | 5045190           | 1024450     | 1010478     | rs755829081  | LOF        | 0.769    | 0.053        | 0.178    |
| KCNA5 | 349 | K   | E   | NM_002234.4(KCNA5):c.1045A>G (p.Lys349Glu)      | Atrial fibrillation, familial, 7                            | Uncertain significance(Last reviewed: Feb 19, 2018) | criteria provided, single submitter                  | VCV000565316 | 12               | 5045192           | 565316      | 565534      | rs1565465758 | LOF        | 0.816    | 0.057        | 0.127    |
| KCNA5 | 354 | R   | W   | NM_002234.4(KCNA5):c.1060C>T (p.Arg354Trp)      | Atrial fibrillation, familial, 7                            | Uncertain significance(Last reviewed: Dec 29, 2019) | criteria provided, single submitter                  | VCV000861735 | 12               | 5045207           | 861735      | 840017      | rs746268474  | Neutral    | 0.687    | 0.158        | 0.156    |
| KCNA5 | 379 | Q   | P   | NM_002234.4(KCNA5):c.1136A>C (p.Gln379Pro)      | Atrial fibrillation, familial, 7                            | Uncertain significance(Last reviewed: Feb 5, 2020)  | criteria provided, single submitter                  | VCV001051710 | 12               | 5045283           | 1051710     | 1048001     | NA           | Neutral    | 0.551    | 0.206        | 0.243    |
| KCNA5 | 380 | Q   | E   | NM_002234.4(KCNA5):c.1138C>G (p.Gln380Glu)      | Atrial fibrillation, familial, 7                            | Uncertain significance(Last reviewed: Jul 16, 2020) | criteria provided, single submitter                  | VCV001042253 | 12               | 5045285           | 1042253     | 1030992     | rs1448543777 | LOF        | 0.663    | 0.144        | 0.193    |
| KCNA5 | 381 | P   | T   | NM_002234.4(KCNA5):c.1141C>A (p.Pro381Thr)      | Atrial fibrillation, familial, 7                            | Uncertain significance(Last reviewed: Jan 15, 2020) | criteria provided, single submitter                  | VCV000946819 | 12               | 5045288           | 946819      | 926658      | rs774114620  | Neutral    | 0.437    | 0.407        | 0.156    |
| KCNA5 | 383 | G   | D   | NM_002234.4(KCNA5):c.1148_1149inv (p.Gly383Asp) | Atrial fibrillation, familial, 7                            | Uncertain significance(Last reviewed: Aug 25, 2020) | criteria provided, single submitter                  | VCV001036384 | 12               | 5045295 - 5045296 | 1036384     | 1030993     | NA           | Neutral    | 0.506    | 0.302        | 0.192    |
| KCNA5 | 384 | G   | R   | NM_002234.4(KCNA5):c.1150G>A (p.Gly384Arg)      | Atrial fibrillation, familial, 7 not provided not specified | Benign/Likely benign(Last reviewed: Oct 19, 2020)   | criteria provided, multiple submitters, no conflicts | VCV000191572 | 12               | 5045297           | 191572      | 189356      | rs76708779   | Neutral    | 0.549    | 0.266        | 0.185    |

| gene  | pos | aa1 | aa2 | Name                                            | Condition(s)                                                | Clinical significance (Last reviewed)               | Review status                                        | Accession    | GRCh38Chromosome | GRCh38Location    | VariationID | AlleleID(s) | dbSNP ID     | prediction | prob.LOF | prob.Neutral | prob.GOF |
|-------|-----|-----|-----|-------------------------------------------------|-------------------------------------------------------------|-----------------------------------------------------|------------------------------------------------------|--------------|------------------|-------------------|-------------|-------------|--------------|------------|----------|--------------|----------|
| KCNA5 | 384 | G   | R   | NM_002234.4(KCNA5):c.1150G>A (p.Gly384Arg)      | Atrial fibrillation, familial, 7 not provided not specified | Benign/Likely benign(Last reviewed: Oct 19, 2020)   | criteria provided, multiple submitters, no conflicts | VCV000191572 | 12               | 5045297           | 191572      | 189356      | rs76708779   | Neutral    | 0.549    | 0.266        | 0.185    |
| KCNA5 | 384 | G   | R   | NM_002234.4(KCNA5):c.1149_1150inv (p.Gly384Arg) | Atrial fibrillation, familial, 7                            | Benign(Last reviewed: Dec 4, 2020)                  | criteria provided, single submitter                  | VCV000469582 | 12               | 5045296 - 5045297 | 469582      | 463166      | NA           | Neutral    | 0.549    | 0.266        | 0.185    |
| KCNA5 | 384 | G   | R   | NM_002234.4(KCNA5):c.1149_1150inv (p.Gly384Arg) | Atrial fibrillation, familial, 7                            | Benign(Last reviewed: Dec 4, 2020)                  | criteria provided, single submitter                  | VCV000469582 | 12               | 5045296 - 5045297 | 469582      | 463166      | NA           | Neutral    | 0.549    | 0.266        | 0.185    |
| KCNA5 | 385 | G   | R   | NM_002234.4(KCNA5):c.1153G>C (p.Gly385Arg)      | Atrial fibrillation, familial, 7                            | Uncertain significance(Last reviewed: Mar 14, 2019) | criteria provided, single submitter                  | VCV000864049 | 12               | 5045300           | 864049      | 840018      | rs1175569776 | Neutral    | 0.554    | 0.263        | 0.184    |
| KCNA5 | 397 | A   | T   | NM_002234.4(KCNA5):c.1189G>A (p.Ala397Thr)      | not provided                                                | Uncertain significance(Last reviewed: Jun 1, 2017)  | criteria provided, single submitter                  | VCV000806780 | 12               | 5045336           | 806780      | 796788      | rs1246627857 | Neutral    | 0.638    | 0.206        | 0.156    |
| KCNA5 | 397 | A   | V   | NM_002234.4(KCNA5):c.1190C>T (p.Ala397Val)      | Atrial fibrillation, familial, 7                            | Uncertain significance(Last reviewed: Aug 31, 2020) | criteria provided, single submitter                  | VCV001026646 | 12               | 5045337           | 1026646     | 1010479     | rs748288439  | Neutral    | 0.534    | 0.309        | 0.158    |
| KCNA5 | 400 | R   | Q   | NM_002234.4(KCNA5):c.1199G>A (p.Arg400Gln)      | Atrial fibrillation, familial, 7                            | Uncertain significance(Last reviewed: Oct 8, 2020)  | criteria provided, single submitter                  | VCV001012073 | 12               | 5045346           | 1012073     | 995254      | rs914933506  | LOF        | 0.877    | 0.048        | 0.075    |
| KCNA5 | 409 | R   | C   | NM_002234.4(KCNA5):c.1225C>T (p.Arg409Cys)      | Atrial fibrillation, familial, 7                            | Uncertain significance(Last reviewed: Aug 14, 2020) | criteria provided, single submitter                  | VCV001018732 | 12               | 5045372           | 1018732     | 1010480     | rs763570659  | LOF        | 0.794    | 0.122        | 0.084    |
| KCNA5 | 429 | A   | V   | NM_002234.4(KCNA5):c.1286C>T (p.Ala429Val)      | Atrial fibrillation, familial, 7                            | Uncertain significance(Last reviewed: May 7, 2019)  | criteria provided, single submitter                  | VCV000853630 | 12               | 5045433           | 853630      | 840019      | rs745704941  | Neutral    | 0.605    | 0.206        | 0.189    |
| KCNA5 | 435 | G   | R   | NM_002234.4(KCNA5):c.1303G>A (p.Gly435Arg)      | Atrial fibrillation, familial, 7                            | Uncertain significance(Last reviewed: Mar 18, 2019) | criteria provided, single submitter                  | VCV000837177 | 12               | 5045450           | 837177      | 840020      | rs1862765898 | LOF        | 0.832    | 0.102        | 0.066    |
| KCNA5 | 438 | I   | V   | NM_002234.4(KCNA5):c.1312A>G (p.Ile438Val)      | Atrial fibrillation, familial, 7                            | Uncertain significance(Last reviewed: Aug 29, 2020) | criteria provided, single submitter                  | VCV001063528 | 12               | 5045459           | 1063528     | 1048002     | NA           | Neutral    | 0.57     | 0.371        | 0.059    |
| KCNA5 | 443 | I   | M   | NM_002234.4(KCNA5):c.1329C>G (p.Ile443Met)      | Atrial fibrillation, familial, 7                            | Uncertain significance(Last reviewed: Feb 26, 2021) | criteria provided, single submitter                  | VCV000997830 | 12               | 5045476           | 997830      | 985548      | rs147209278  | Neutral    | 0.594    | 0.323        | 0.083    |
| KCNA5 | 443 | I   | V   | NM_002234.4(KCNA5):c.1327A>G (p.Ile443Val)      | not provided Atrial fibrillation, familial, 7               | Uncertain significance(Last reviewed: Jun 15, 2021) | criteria provided, multiple submitters, no conflicts | VCV000469583 | 12               | 5045474           | 469583      | 462538      | rs370591031  | Neutral    | 0.531    | 0.39         | 0.079    |
| KCNA5 | 452 | V   | I   | NM_002234.4(KCNA5):c.1354G>A (p.Val452Ile)      | Atrial fibrillation, familial, 7 Arrhythmia                 | Uncertain significance(Last reviewed: Jan 1, 2017)  | criteria provided, single submitter                  | VCV000523450 | 12               | 5045501           | 523450      | 514020      | rs1486417435 | Neutral    | 0.545    | 0.367        | 0.089    |
| KCNA5 | 452 | V   | L   | NM_002234.4(KCNA5):c.1354G>C (p.Val452Leu)      | Atrial fibrillation, familial, 7                            | Uncertain significance(Last reviewed: Jun 25, 2018) | criteria provided, single submitter                  | VCV000574366 | 12               | 5045501           | 574366      | 566872      | rs1486417435 | Neutral    | 0.563    | 0.342        | 0.095    |
| KCNA5 | 455 | A   | T   | NM_002234.4(KCNA5):c.1363G>A                    | Atrial fibrillation, familial, 7                            | Uncertain                                           | criteria                                             | VCV001055852 | 12               | 5045510           | 1055852     | 1048003     | NA           | LOF        | 0.723    | 0.121        | 0.156    |

| gene  | pos | aa1 | aa2 | Name                                       | Condition(s)                                  | Clinical significance (Last reviewed)                                     | Review status                                        | Accession    | GRCh38Chromosome | GRCh38Location | VariationID | AlleleID(s) | dbSNP ID     | prediction | prob.LOF | prob.Neutral | prob.GOF |
|-------|-----|-----|-----|--------------------------------------------|-----------------------------------------------|---------------------------------------------------------------------------|------------------------------------------------------|--------------|------------------|----------------|-------------|-------------|--------------|------------|----------|--------------|----------|
|       |     |     |     | (p.Ala455Thr)                              |                                               | significance(Last reviewed: May 21, 2020)                                 | provided, single submitter                           |              |                  |                |             |             |              |            |          |              |          |
| KCNA5 | 465 | S   | C   | NM_002234.4(KCNA5):c.1394C>G (p.Ser465Cys) | Atrial fibrillation, familial, 7              | Uncertain significance(Last reviewed: Oct 20, 2020)                       | criteria provided, single submitter                  | VCV001022595 | 12               | 5045541        | 1022595     | 1010481     | rs148812702  | LOF        | 0.632    | 0.143        | 0.225    |
| KCNA5 | 467 | I   | T   | NM_002234.4(KCNA5):c.1400T>C (p.Ile467Thr) | Atrial fibrillation, familial, 7              | Uncertain significance(Last reviewed: Jun 17, 2018)                       | criteria provided, single submitter                  | VCV000537312 | 12               | 5045547        | 537312      | 527767      | rs746800603  | Neutral    | 0.707    | 0.161        | 0.132    |
| KCNA5 | 496 | V   | M   | NM_002234.4(KCNA5):c.1486G>A (p.Val496Met) | Atrial fibrillation, familial, 7              | Uncertain significance(Last reviewed: May 20, 2020)                       | criteria provided, single submitter                  | VCV001026851 | 12               | 5045633        | 1026851     | 1010482     | rs757749649  | Neutral    | 0.565    | 0.295        | 0.14     |
| KCNA5 | 498 | S   | L   | NM_002234.4(KCNA5):c.1493C>T (p.Ser498Leu) | Atrial fibrillation, familial, 7              | Uncertain significance(Last reviewed: Apr 21, 2020)                       | criteria provided, single submitter                  | VCV001055873 | 12               | 5045640        | 1055873     | 1048004     | NA           | Neutral    | 0.72     | 0.145        | 0.134    |
| KCNA5 | 503 | A   | T   | NM_002234.4(KCNA5):c.1507G>A (p.Ala503Thr) | Atrial fibrillation, familial, 7              | Uncertain significance(Last reviewed: Feb 8, 2020)                        | criteria provided, single submitter                  | VCV001036453 | 12               | 5045654        | 1036453     | 1030995     | rs140711603  | Neutral    | 0.611    | 0.277        | 0.112    |
| KCNA5 | 505 | V   | A   | NM_002234.4(KCNA5):c.1514T>C (p.Val505Ala) | not provided                                  | Uncertain significance(Last reviewed: Feb 7, 2019)                        | criteria provided, single submitter                  | VCV001304443 | 12               | 5045661        | 1304443     | 1294718     | NA           | Neutral    | 0.57     | 0.327        | 0.103    |
| KCNA5 | 522 | F   | S   | NM_002234.4(KCNA5):c.1565T>C (p.Phe522Ser) | Atrial fibrillation, familial, 7              | Uncertain significance(Last reviewed: May 25, 2019)                       | criteria provided, single submitter                  | VCV000579216 | 12               | 5045712        | 579216      | 565541      | rs1565466043 | Neutral    | 0.617    | 0.242        | 0.141    |
| KCNA5 | 525 | R   | W   | NM_002234.4(KCNA5):c.1573C>T (p.Arg525Trp) | Atrial fibrillation, familial, 7              | Uncertain significance(Last reviewed: Aug 21, 2020)                       | criteria provided, single submitter                  | VCV000944575 | 12               | 5045720        | 944575      | 926659      | rs376656991  | Neutral    | 0.501    | 0.344        | 0.155    |
| KCNA5 | 527 | T   | M   | NM_002234.4(KCNA5):c.1580C>T (p.Thr527Met) | Atrial fibrillation, familial, 7 not provided | Uncertain significance(Last reviewed: May 9, 2019)                        | criteria provided, multiple submitters, no conflicts | VCV000013470 | 12               | 5045727        | 13470       | 28509       | rs121908591  | Neutral    | 0.528    | 0.333        | 0.139    |
| KCNA5 | 530 | E   | K   | NM_002234.4(KCNA5):c.1588G>A (p.Glu530Lys) | not provided Atrial fibrillation, familial, 7 | Uncertain significance(Last reviewed: Jul 13, 2020)                       | criteria provided, multiple submitters, no conflicts | VCV000848914 | 12               | 5045735        | 848914      | 840021      | rs915470188  | Neutral    | 0.711    | 0.162        | 0.127    |
| KCNA5 | 532 | P   | L   | NM_002234.4(KCNA5):c.1595C>T (p.Pro532Leu) | not provided Atrial fibrillation, familial, 7 | Conflicting interpretations of pathogenicity(Last reviewed: Dec 14, 2020) | criteria provided, conflicting interpretations       | VCV000469586 | 12               | 5045742        | 469586      | 462542      | rs17221812   | Neutral    | 0.419    | 0.492        | 0.089    |
| KCNA5 | 546 | P   | S   | NM_002234.4(KCNA5):c.1636C>T (p.Pro546Ser) | Atrial fibrillation, familial, 7              | Uncertain significance(Last reviewed: Mar 12, 2020)                       | criteria provided, single submitter                  | VCV001023092 | 12               | 5045783        | 1023092     | 1010483     | rs142289285  | Neutral    | 0.422    | 0.457        | 0.12     |
| KCNA5 | 554 | R   | Q   | NM_002234.4(KCNA5):c.1661G>A (p.Arg554Gln) | Atrial fibrillation, familial, 7              | Uncertain significance(Last reviewed: Nov 13, 2019)                       | criteria provided, single submitter                  | VCV000966389 | 12               | 5045808        | 966389      | 956897      | rs71581016   | Neutral    | 0.528    | 0.323        | 0.148    |
| KCNA5 | 557 | S   | N   | NM_002234.4(KCNA5):c.1670G>A (p.Ser557Asn) | Atrial fibrillation, familial, 7              | Uncertain significance(Last reviewed: Aug 26, 2020)                       | criteria provided, single submitter                  | VCV001014743 | 12               | 5045817        | 1014743     | 1010484     | rs201466058  | Neutral    | 0.529    | 0.308        | 0.163    |

| gene  | pos | aa1 | aa2 | Name                                       | Condition(s)                                                                   | Clinical significance (Last reviewed)                                     | Review status                                        | Accession    | GRCh38Chromosome | GRCh38Location | VariationID | AlleleID(s) | dbSNP ID     | prediction | prob.LOF | prob.Neutral | prob.GOF |
|-------|-----|-----|-----|--------------------------------------------|--------------------------------------------------------------------------------|---------------------------------------------------------------------------|------------------------------------------------------|--------------|------------------|----------------|-------------|-------------|--------------|------------|----------|--------------|----------|
| KCNA5 | 558 | G   | R   | NM_002234.4(KCNA5):c.1672G>A (p.Gly558Arg) | Atrial fibrillation, familial, 7                                               | Conflicting interpretations of pathogenicity(Last reviewed: Nov 21, 2020) | criteria provided, conflicting interpretations       | VCV000469587 | 12               | 5045819        | 469587      | 463167      | rs201328038  | Neutral    | 0.562    | 0.282        | 0.156    |
| KCNA5 | 561 | G   | R   | NM_002234.4(KCNA5):c.1681G>C (p.Gly561Arg) | Atrial fibrillation, familial, 7                                               | Uncertain significance(Last reviewed: Sep 7, 2017)                        | criteria provided, single submitter                  | VCV000537309 | 12               | 5045828        | 537309      | 527210      | rs1440776773 | Neutral    | 0.596    | 0.257        | 0.147    |
| KCNA5 | 568 | G   | V   | NM_002234.4(KCNA5):c.1703G>T (p.Gly568Val) | not provided Heart disease Atrial fibrillation, familial, 7                    | Uncertain significance(Last reviewed: Jul 15, 2021)                       | criteria provided, multiple submitters, no conflicts | VCV000374033 | 12               | 5045850        | 374033      | 360948      | rs71581017   | Neutral    | 0.445    | 0.437        | 0.118    |
| KCNA5 | 568 | G   | W   | NM_002234.4(KCNA5):c.1702G>T (p.Gly568Trp) | Atrial fibrillation, familial, 7                                               | Uncertain significance(Last reviewed: Oct 29, 2018)                       | criteria provided, single submitter                  | VCV000648351 | 12               | 5045849        | 648351      | 641194      | rs1281374886 | Neutral    | 0.478    | 0.405        | 0.117    |
| KCNA5 | 576 | A   | T   | NM_002234.4(KCNA5):c.1726G>A (p.Ala576Thr) | not provided                                                                   | Uncertain significance(Last reviewed: May 2, 2019)                        | criteria provided, single submitter                  | VCV001305421 | 12               | 5045873        | 1305421     | 1298015     | NA           | Neutral    | 0.466    | 0.343        | 0.192    |
| KCNA5 | 576 | A   | V   | NM_002234.4(KCNA5):c.1727C>T (p.Ala576Val) | Atrial fibrillation, familial, 7                                               | Pathogenic(Last reviewed: May 1, 2009)                                    | no assertion criteria provided                       | VCV000013471 | 12               | 5045874        | 13471       | 28510       | rs121908592  | Neutral    | 0.439    | 0.387        | 0.173    |
| KCNA5 | 577 | R   | Q   | NM_002234.4(KCNA5):c.1730G>A (p.Arg577Gln) | Atrial fibrillation, familial, 7                                               | Uncertain significance(Last reviewed: Oct 14, 2019)                       | criteria provided, single submitter                  | VCV000537311 | 12               | 5045877        | 537311      | 527211      | rs139805781  | Neutral    | 0.653    | 0.227        | 0.12     |
| KCNA5 | 578 | R   | K   | NM_002234.4(KCNA5):c.1733G>A (p.Arg578Lys) | Atrial fibrillation, familial, 7 not specified Brugada syndrome 1 not provided | Conflicting interpretations of pathogenicity(Last reviewed: Dec 4, 2020)  | criteria provided, conflicting interpretations       | VCV000191573 | 12               | 5045880        | 191573      | 189357      | rs12720445   | Neutral    | 0.707    | 0.184        | 0.109    |
| KCNA5 | 586 | C   | G   | NM_002234.4(KCNA5):c.1756T>G (p.Cys586Gly) | Atrial fibrillation, familial, 7                                               | Uncertain significance(Last reviewed: Jun 4, 2020)                        | criteria provided, single submitter                  | VCV001017278 | 12               | 5045903        | 1017278     | 1010485     | rs1862773506 | Neutral    | 0.551    | 0.324        | 0.124    |
| KCNA5 | 597 | R   | Q   | NM_002234.4(KCNA5):c.1790G>A (p.Arg597Gln) | Atrial fibrillation, familial, 7 not provided                                  | Conflicting interpretations of pathogenicity(Last reviewed: Oct 25, 2021) | criteria provided, conflicting interpretations       | VCV000537308 | 12               | 5045937        | 537308      | 527217      | rs201342234  | Neutral    | 0.637    | 0.228        | 0.135    |
| KCNA5 | 597 | R   | W   | NM_002234.4(KCNA5):c.1789C>T (p.Arg597Trp) | Atrial fibrillation, familial, 7                                               | Uncertain significance(Last reviewed: Apr 28, 2017)                       | criteria provided, single submitter                  | VCV000882944 | 12               | 5045936        | 882944      | 870030      | rs759691488  | Neutral    | 0.479    | 0.394        | 0.127    |
| KCNA5 | 609 | R   | P   | NM_002234.4(KCNA5):c.1826G>C (p.Arg609Pro) | Atrial fibrillation, familial, 7                                               | Uncertain significance(Last reviewed: Jun 29, 2017)                       | criteria provided, single submitter                  | VCV000469588 | 12               | 5045973        | 469588      | 462545      | rs991950771  | Neutral    | 0.654    | 0.244        | 0.102    |
| KCNA5 | 609 | R   | Q   | NM_002234.4(KCNA5):c.1826G>A (p.Arg609Gln) | Atrial fibrillation, familial, 7                                               | Uncertain significance(Last reviewed: May 7, 2019)                        | criteria provided, single submitter                  | VCV000665819 | 12               | 5045973        | 665819      | 641195      | rs991950771  | Neutral    | 0.729    | 0.173        | 0.098    |
| KCNA5 | 610 | E   | K   | NM_002234.4(KCNA5):c.1828G>A (p.Glu610Lys) | Atrial fibrillation, familial, 7                                               | Pathogenic(Last reviewed: May 1, 2009)                                    | no assertion criteria provided                       | VCV000013472 | 12               | 5045975        | 13472       | 28511       | rs121908593  | LOF        | 0.763    | 0.139        | 0.098    |
| KCNA5 | 611 | T   | K   | NM_002234.4(KCNA5):c.1832C>A (p.Thr611Lys) | Atrial fibrillation, familial, 7                                               | Uncertain significance(Last reviewed: Jun 7, 2018)                        | criteria provided, single submitter                  | VCV000566746 | 12               | 5045979        | 566746      | 566879      | rs765166524  | Neutral    | 0.714    | 0.183        | 0.103    |

| gene  | pos | aa1 | aa2 | Name                                            | Condition(s)                                               | Clinical significance (Last reviewed)               | Review status                                        | Accession    | GRCh38Chromosome | GRCh38Location      | VariationID | AlleleID(s) | dbSNP ID     | prediction | prob.LOF | prob.Neutral | prob.GOF |
|-------|-----|-----|-----|-------------------------------------------------|------------------------------------------------------------|-----------------------------------------------------|------------------------------------------------------|--------------|------------------|---------------------|-------------|-------------|--------------|------------|----------|--------------|----------|
| KCNB1 | 2   | P   | R   | NM_004975.4(KCNB1):c.5C>G (p.Pro2Arg)           | Epileptic encephalopathy, early infantile, 26              | Benign(Last reviewed: Oct 14, 2020)                 | criteria provided, single submitter                  | VCV001167120 | 20               | 49482476            | 1167120     | 1158898     | NA           | Neutral    | 0.71     | 0.174        | 0.116    |
| KCNB1 | 2   | P   | S   | NM_004975.4(KCNB1):c.4C>T (p.Pro2Ser)           | Epileptic encephalopathy, early infantile, 26              | Likely benign(Last reviewed: Dec 27, 2019)          | criteria provided, single submitter                  | VCV000833790 | 20               | 49482477            | 833790      | 822172      | rs1054441474 | Neutral    | 0.7      | 0.184        | 0.116    |
| KCNB1 | 7   | K   | E   | NM_004975.4(KCNB1):c.19A>G (p.Lys7Glu)          | Epileptic encephalopathy, early infantile, 26  Seizures    | Uncertain significance(Last reviewed: Aug 2, 2019)  | criteria provided, multiple submitters, no conflicts | VCV000577816 | 20               | 49482462            | 577816      | 571303      | rs936778119  | Neutral    | 0.675    | 0.2          | 0.125    |
| KCNB1 | 24  | V   | M   | NM_004975.4(KCNB1):c.70G>A (p.Val24Met)         | not provided                                               | Uncertain significance(Last reviewed: Nov 2, 2020)  | criteria provided, single submitter                  | VCV001313585 | 20               | 49482411            | 1313585     | 1303846     | NA           | LOF        | 0.768    | 0.134        | 0.098    |
| KCNB1 | 25  | R   | Q   | NM_004975.4(KCNB1):c.74_75delinsAA (p.Arg25Gln) | not provided                                               | Uncertain significance(Last reviewed: May 17, 2021) | criteria provided, single submitter                  | VCV001309158 | 20               | 49482406 - 49482407 | 1309158     | 1299858     | NA           | LOF        | 0.73     | 0.16         | 0.11     |
| KCNB1 | 28  | A   | V   | NM_004975.4(KCNB1):c.83C>T (p.Ala28Val)         | Epileptic encephalopathy, early infantile, 26 not provided | Uncertain significance(Last reviewed: Jun 18, 2019) | criteria provided, multiple submitters, no conflicts | VCV000936998 | 20               | 49482398            | 936998      | 939007      | rs769852170  | LOF        | 0.753    | 0.136        | 0.111    |
| KCNB1 | 38  | G   | A   | NM_004975.4(KCNB1):c.113G>C (p.Gly38Ala)        | not provided                                               | Uncertain significance(Last reviewed: Jun 26, 2017) | criteria provided, single submitter                  | VCV000432932 | 20               | 49482368            | 432932      | 426343      | rs1555801618 | LOF        | 0.861    | 0.067        | 0.072    |
| KCNB1 | 41  | A   | V   | NM_004975.4(KCNB1):c.122C>T (p.Ala41Val)        | Epileptic encephalopathy, early infantile, 26              | Uncertain significance(Last reviewed: Dec 6, 2019)  | criteria provided, single submitter                  | VCV000855507 | 20               | 49482359            | 855507      | 848478      | rs1980525336 | LOF        | 0.803    | 0.115        | 0.082    |
| KCNB1 | 42  | H   | Q   | NM_004975.4(KCNB1):c.126C>G (p.His42Gln)        | Epileptic encephalopathy, early infantile, 26              | Uncertain significance(Last reviewed: Dec 13, 2018) | criteria provided, single submitter                  | VCV000580878 | 20               | 49482355            | 580878      | 575116      | rs1568658526 | LOF        | 0.805    | 0.115        | 0.08     |
| KCNB1 | 43  | E   | G   | NM_004975.4(KCNB1):c.128A>G (p.Glu43Gly)        | Epileptic encephalopathy                                   | Likely pathogenic(Last reviewed: Mar 1, 2019)       | criteria provided, single submitter                  | VCV000633619 | 20               | 49482353            | 633619      | 622069      | rs1568658507 | LOF        | 0.795    | 0.12         | 0.085    |
| KCNB1 | 81  | N   | I   | NM_004975.4(KCNB1):c.242A>T (p.Asn81Ile)        | Epileptic encephalopathy, early infantile, 26              | Uncertain significance(Last reviewed: Jan 19, 2021) | no assertion criteria provided                       | VCV001174488 | 20               | 49482239            | 1174488     | 1163751     | NA           | LOF        | 0.812    | 0.089        | 0.098    |
| KCNB1 | 114 | S   | R   | NM_004975.4(KCNB1):c.342C>A (p.Ser114Arg)       | not provided                                               | Uncertain significance(Last reviewed: Oct 20, 2020) | criteria provided, single submitter                  | VCV001312383 | 20               | 49482139            | 1312383     | 1301765     | NA           | LOF        | 0.848    | 0.064        | 0.087    |
| KCNB1 | 137 | Y   | F   | NM_004975.4(KCNB1):c.410A>T (p.Tyr137Phe)       | not provided                                               | Uncertain significance(Last reviewed: Oct 13, 2020) | criteria provided, single submitter                  | VCV001162860 | 20               | 49482071            | 1162860     | 1152899     | NA           | LOF        | 0.812    | 0.092        | 0.096    |
| KCNB1 | 144 | M   | I   | NM_004975.4(KCNB1):c.432G>A (p.Met144Ile)       | Epileptic encephalopathy, early infantile, 26              | Uncertain significance(Last reviewed: Jul 11, 2019) | criteria provided, single submitter                  | VCV000950197 | 20               | 49482049            | 950197      | 929222      | rs1179147119 | LOF        | 0.799    | 0.116        | 0.085    |
| KCNB1 | 154 | T   | I   | NM_004975.4(KCNB1):c.461C>T (p.Thr154Ile)       | Epileptic encephalopathy, early infantile, 26              | Likely benign(Last reviewed: Aug 21, 2020)          | criteria provided, single submitter                  | VCV001110401 | 20               | 49482020            | 1110401     | 1107109     | NA           | LOF        | 0.783    | 0.11         | 0.107    |
| KCNB1 | 157 | E   | D   | NM_004975.4(KCNB1):c.471G>T (p.Glu157Asp)       | Epileptic encephalopathy, early infantile, 26              | Uncertain significance(Last reviewed: Oct 14, 2020) | criteria provided, single submitter                  | VCV000582652 | 20               | 49482010            | 582652      | 571295      | rs144926751  | Neutral    | 0.727    | 0.168        | 0.105    |

| gene  | pos | aa1 | aa2 | Name                                      | Condition(s)                                                                                                                 | Clinical significance (Last reviewed)                                     | Review status                                        | Accession    | GRCh38Chromosome | GRCh38Location | VariationID | AlleleID(s) | dbSNP ID     | prediction | prob.LOF | prob.Neutral | prob.GOF |
|-------|-----|-----|-----|-------------------------------------------|------------------------------------------------------------------------------------------------------------------------------|---------------------------------------------------------------------------|------------------------------------------------------|--------------|------------------|----------------|-------------|-------------|--------------|------------|----------|--------------|----------|
|       |     |     |     |                                           |                                                                                                                              | reviewed: Apr 2, 2018)                                                    | submitter                                            |              |                  |                |             |             |              |            |          |              |          |
| KCNB1 | 189 | K   | N   | NM_004975.4(KCNB1):c.567G>C (p.Lys189Asn) | not provided                                                                                                                 | Uncertain significance(Last reviewed: Dec 1, 2019)                        | criteria provided, single submitter                  | VCV000872734 | 20               | 49481914       | 872734      | 860652      | rs1980508600 | LOF        | 0.845    | 0.077        | 0.078    |
| KCNB1 | 193 | I   | K   | NM_004975.4(KCNB1):c.578T>A (p.Ile193Lys) | Epileptic encephalopathy, early infantile, 26                                                                                | Uncertain significance(Last reviewed: Oct 8, 2018)                        | criteria provided, single submitter                  | VCV000475267 | 20               | 49374982       | 475267      | 470457      | rs1555889171 | LOF        | 0.862    | 0.07         | 0.068    |
| KCNB1 | 199 | I   | F   | NM_004975.4(KCNB1):c.595A>T (p.Ile199Phe) | Epileptic encephalopathy, early infantile, 26                                                                                | Likely pathogenic(Last reviewed: May 28, 2019)                            | criteria provided, single submitter                  | VCV000803613 | 20               | 49374965       | 803613      | 791988      | rs1601072041 | LOF        | 0.864    | 0.047        | 0.09     |
| KCNB1 | 199 | I   | S   | NM_004975.4(KCNB1):c.596T>G (p.Ile199Ser) | not provided                                                                                                                 | Uncertain significance(Last reviewed: Oct 7, 2019)                        | criteria provided, single submitter                  | VCV001303788 | 20               | 49374964       | 1303788     | 1294063     | NA           | LOF        | 0.887    | 0.047        | 0.066    |
| KCNB1 | 200 | V   | I   | NM_004975.4(KCNB1):c.598G>A (p.Val200Ile) | not provided                                                                                                                 | Likely benign(Last reviewed: Mar 23, 2018)                                | criteria provided, single submitter                  | VCV000429380 | 20               | 49374962       | 429380      | 422324      | rs748573940  | LOF        | 0.846    | 0.078        | 0.075    |
| KCNB1 | 202 | S   | C   | NM_004975.4(KCNB1):c.605C>G (p.Ser202Cys) | not provided                                                                                                                 | Likely pathogenic(Last reviewed: Apr 1, 2020)                             | criteria provided, single submitter                  | VCV000932381 | 20               | 49374955       | 932381      | 920972      | rs1060499607 | LOF        | 0.875    | 0.044        | 0.081    |
| KCNB1 | 202 | S   | F   | NM_004975.4(KCNB1):c.605C>T (p.Ser202Phe) | Epileptic encephalopathy, early infantile, 26                                                                                | Uncertain significance(Last reviewed: Apr 8, 2016)                        | no assertion criteria provided                       | VCV000417935 | 20               | 49374955       | 417935      | 404844      | rs1060499607 | LOF        | 0.861    | 0.042        | 0.097    |
| KCNB1 | 209 | N   | K   | NM_004975.4(KCNB1):c.627C>A (p.Asn209Lys) | Epileptic encephalopathy, early infantile, 26                                                                                | Uncertain significance(Last reviewed: May 21, 2020)                       | criteria provided, single submitter                  | VCV000943082 | 20               | 49374933       | 943082      | 939006      | rs1984276555 | LOF        | 0.848    | 0.067        | 0.085    |
| KCNB1 | 210 | T   | M   | NM_004975.4(KCNB1):c.629C>T (p.Thr210Met) | developmental encephalopathy with epilepsy KCNB1-related disorder not provided Epileptic encephalopathy, early infantile, 26 | Pathogenic/Likely pathogenic(Last reviewed: Dec 30, 2021)                 | criteria provided, multiple submitters, no conflicts | VCV000542057 | 20               | 49374931       | 542057      | 533574      | rs1555889162 | LOF        | 0.856    | 0.05         | 0.094    |
| KCNB1 | 210 | T   | R   | NM_004975.4(KCNB1):c.629C>G (p.Thr210Arg) | Epileptic encephalopathy                                                                                                     | Pathogenic(Last reviewed: Mar 1, 2019)                                    | criteria provided, single submitter                  | VCV000633620 | 20               | 49374931       | 633620      | 622068      | rs1555889162 | LOF        | 0.857    | 0.056        | 0.087    |
| KCNB1 | 218 | D   | E   | NM_004975.4(KCNB1):c.654T>G (p.Asp218Glu) | Epileptic encephalopathy, early infantile, 26                                                                                | Uncertain significance(Last reviewed: Sep 1, 2020)                        | criteria provided, single submitter                  | VCV001056665 | 20               | 49374906       | 1056665     | 1051744     | NA           | LOF        | 0.778    | 0.128        | 0.094    |
| KCNB1 | 221 | G   | S   | NM_004975.4(KCNB1):c.661G>A (p.Gly221Ser) | not provided                                                                                                                 | Uncertain significance(Last reviewed: Oct 1, 2019)                        | criteria provided, single submitter                  | VCV001308882 | 20               | 49374899       | 1308882     | 1300910     | NA           | LOF        | 0.814    | 0.099        | 0.087    |
| KCNB1 | 235 | V   | M   | NM_004975.4(KCNB1):c.703G>A (p.Val235Met) | Epileptic encephalopathy, early infantile, 26                                                                                | Uncertain significance(Last reviewed: Jan 17, 2019)                       | criteria provided, single submitter                  | VCV000863356 | 20               | 49374857       | 863356      | 848477      | rs1315753296 | LOF        | 0.843    | 0.077        | 0.081    |
| KCNB1 | 246 | L   | R   | NM_004975.4(KCNB1):c.737T>G (p.Leu246Arg) | Epileptic encephalopathy, early infantile, 26                                                                                | Conflicting interpretations of pathogenicity(Last reviewed: Jul 21, 2020) | criteria provided, conflicting interpretations       | VCV000647049 | 20               | 49374823       | 647049      | 648764      | rs1601071839 | LOF        | 0.857    | 0.067        | 0.076    |
| KCNB1 | 247 | R   | K   | NM_004975.4(KCNB1):c.740G>A (p.Arg247Lys) | Epileptic encephalopathy, early infantile, 26                                                                                | Uncertain significance(Last reviewed: Mar 13,                             | criteria provided, single submitter                  | VCV000852956 | 20               | 49374820       | 852956      | 848476      | rs1984270863 | LOF        | 0.837    | 0.078        | 0.086    |

| gene  | pos | aa1 | aa2 | Name                                      | Condition(s)                                                                                                                                                                     | Clinical significance (Last reviewed)                                     | Review status                                        | Accession    | GRCh38Chromosome | GRCh38Location | VariationID | AlleleID(s) | dbSNP ID     | prediction | prob.LOF | prob.Neutral | prob.GOF |
|-------|-----|-----|-----|-------------------------------------------|----------------------------------------------------------------------------------------------------------------------------------------------------------------------------------|---------------------------------------------------------------------------|------------------------------------------------------|--------------|------------------|----------------|-------------|-------------|--------------|------------|----------|--------------|----------|
|       |     |     |     |                                           |                                                                                                                                                                                  | 2019)                                                                     |                                                      |              |                  |                |             |             |              |            |          |              |          |
| KCNB1 | 251 | S   | L   | NM_004975.4(KCNB1):c.752C>T (p.Ser251Leu) | Epileptic encephalopathy, early infantile, 26                                                                                                                                    | Uncertain significance(Last reviewed: Apr 14, 2020)                       | criteria provided, single submitter                  | VCV001016853 | 20               | 49374808       | 1016853     | 1014172     | rs1984270019 | LOF        | 0.842    | 0.063        | 0.095    |
| KCNB1 | 252 | P   | S   | NM_004975.4(KCNB1):c.754C>T (p.Pro252Ser) | Epileptic encephalopathy, early infantile, 26                                                                                                                                    | Uncertain significance(Last reviewed: Aug 10, 2020)                       | criteria provided, single submitter                  | VCV000998500 | 20               | 49374806       | 998500      | 999055      | rs1984269566 | LOF        | 0.842    | 0.08         | 0.078    |
| KCNB1 | 271 | L   | P   | NM_004975.4(KCNB1):c.812T>C (p.Leu271Pro) | Epileptic encephalopathy, early infantile, 26                                                                                                                                    | Uncertain significance(Last reviewed: May 29, 2019)                       | criteria provided, single submitter                  | VCV000572716 | 20               | 49374748       | 572716      | 573574      | rs1569017375 | LOF        | 0.865    | 0.07         | 0.065    |
| KCNB1 | 272 | P   | S   | NM_004975.4(KCNB1):c.814C>T (p.Pro272Ser) | Epileptic encephalopathy, early infantile, 26                                                                                                                                    | Likely pathogenic(Last reviewed: May 28, 2019)                            | criteria provided, single submitter                  | VCV000803612 | 20               | 49374746       | 803612      | 791987      | rs1601071747 | LOF        | 0.888    | 0.052        | 0.06     |
| KCNB1 | 281 | E   | K   | NM_004975.4(KCNB1):c.841G>A (p.Glu281Lys) | not provided                                                                                                                                                                     | Conflicting interpretations of pathogenicity(Last reviewed: Oct 19, 2020) | criteria provided, conflicting interpretations       | VCV000809258 | 20               | 49374719       | 809258      | 797994      | rs1601071708 | LOF        | 0.786    | 0.117        | 0.097    |
| KCNB1 | 286 | V   | M   | NM_004975.4(KCNB1):c.856G>A (p.Val286Met) | Epileptic encephalopathy, early infantile, 26                                                                                                                                    | Uncertain significance(Last reviewed: Sep 1, 2020)                        | criteria provided, single submitter                  | VCV000946306 | 20               | 49374704       | 946306      | 929221      | rs1194019938 | LOF        | 0.815    | 0.09         | 0.095    |
| KCNB1 | 293 | R   | C   | NM_004975.4(KCNB1):c.877C>T (p.Arg293Cys) | Epileptic encephalopathy, early infantile, 26                                                                                                                                    | Conflicting interpretations of pathogenicity(Last reviewed: Feb 26, 2021) | criteria provided, conflicting interpretations       | VCV000940052 | 20               | 49374683       | 940052      | 939005      | rs1984264748 | LOF        | 0.824    | 0.071        | 0.106    |
| KCNB1 | 297 | Q   | R   | NM_004975.4(KCNB1):c.890A>G (p.Gln297Arg) | Epileptic encephalopathy, early infantile, 26                                                                                                                                    | Uncertain significance(Last reviewed: Oct 8, 2020)                        | criteria provided, single submitter                  | VCV001040672 | 20               | 49374670       | 1040672     | 1034745     | rs749981323  | LOF        | 0.835    | 0.077        | 0.088    |
| KCNB1 | 300 | R   | C   | NM_004975.4(KCNB1):c.898C>T (p.Arg300Cys) | Epileptic encephalopathy, early infantile, 26                                                                                                                                    | Uncertain significance(Last reviewed: Jan 1, 2019)                        | criteria provided, single submitter                  | VCV000983032 | 20               | 49374662       | 983032      | 971148      | rs202170806  | LOF        | 0.865    | 0.042        | 0.094    |
| KCNB1 | 303 | R   | Q   | NM_004975.4(KCNB1):c.908G>A (p.Arg303Gln) | Epileptic encephalopathy, early infantile, 26 not provided                                                                                                                       | Likely pathogenic(Last reviewed: Apr 9, 2019)                             | criteria provided, multiple submitters, no conflicts | VCV000373805 | 20               | 49374652       | 373805      | 360423      | rs1057518621 | LOF        | 0.851    | 0.066        | 0.083    |
| KCNB1 | 306 | R   | C   | NM_004975.4(KCNB1):c.916C>T (p.Arg306Cys) | Intellectual disability Epileptic encephalopathy, early infantile, 26 developmental encephalopathy with epilepsy Myoclonic absence seizure Epileptic encephalopathy not provided | Conflicting interpretations of pathogenicity(Last reviewed: Mar 15, 2021) | criteria provided, conflicting interpretations       | VCV000449693 | 20               | 49374644       | 449693      | 446266      | rs1555889130 | LOF        | 0.862    | 0.042        | 0.095    |
| KCNB1 | 306 | R   | H   | NM_004975.4(KCNB1):c.917G>A (p.Arg306His) | Epileptic encephalopathy, early infantile, 26                                                                                                                                    | Likely pathogenic(Last reviewed: Jan 1, 2019)                             | criteria provided, single submitter                  | VCV000982573 | 20               | 49374643       | 982573      | 971147      | rs1984262011 | LOF        | 0.848    | 0.062        | 0.09     |
| KCNB1 | 307 | I   | V   | NM_004975.4(KCNB1):c.919A>G (p.Ile307Val) | Epileptic encephalopathy, early infantile, 26                                                                                                                                    | Uncertain significance(Last reviewed: Aug 30, 2020)                       | criteria provided, single submitter                  | VCV001057900 | 20               | 49374641       | 1057900     | 1051742     | NA           | LOF        | 0.851    | 0.077        | 0.073    |
| KCNB1 | 311 | A   | T   | NM_004975.4(KCNB1):c.931G>A (p.Ala311Thr) | Epileptic encephalopathy, early infantile, 26                                                                                                                                    | Uncertain significance(Last reviewed: Jan 20, 2020)                       | criteria provided, single submitter                  | VCV001056800 | 20               | 49374629       | 1056800     | 1051741     | NA           | LOF        | 0.844    | 0.073        | 0.082    |

| gene  | pos | aa1 | aa2 | Name                                      | Condition(s)                                                                                                                                                                                                                                                                                                         | Clinical significance (Last reviewed)                                     | Review status                                        | Accession    | GRCh38Chromosome | GRCh38Location | VariationID | AlleleID(s) | dbSNP ID     | prediction | prob.LOF | prob.Neutral | prob.GOF |
|-------|-----|-----|-----|-------------------------------------------|----------------------------------------------------------------------------------------------------------------------------------------------------------------------------------------------------------------------------------------------------------------------------------------------------------------------|---------------------------------------------------------------------------|------------------------------------------------------|--------------|------------------|----------------|-------------|-------------|--------------|------------|----------|--------------|----------|
| KCNB1 | 312 | R   | C   | NM_004975.4(KCNB1):c.934C>T (p.Arg312Cys) | Epileptic encephalopathy, early infantile, 26 Inborn genetic diseases Intellectual disability not provided                                                                                                                                                                                                           | Pathogenic/Likely pathogenic(Last reviewed: Feb 2, 2022)                  | criteria provided, multiple submitters, no conflicts | VCV000265207 | 20               | 49374626       | 265207      | 260231      | NA           | LOF        | 0.857    | 0.046        | 0.097    |
| KCNB1 | 312 | R   | H   | NM_004975.4(KCNB1):c.935G>A (p.Arg312His) | Intellectual disability Early infantile epileptic encephalopathy with suppression bursts not provided Delayed speech and language development Seizures Epileptic encephalopathy Difficulty walking Intellectual disability Generalized hypotonia Epileptic encephalopathy developmental encephalopathy with epilepsy | Pathogenic/Likely pathogenic(Last reviewed: Sep 1, 2021)                  | criteria provided, multiple submitters, no conflicts | VCV000523478 | 20               | 49374625       | 523478      | 514105      | rs1555889127 | LOF        | 0.841    | 0.067        | 0.092    |
| KCNB1 | 313 | H   | R   | NM_004975.4(KCNB1):c.938A>G (p.His313Arg) | not provided                                                                                                                                                                                                                                                                                                         | Likely pathogenic(Last reviewed: Jun 7, 2016)                             | criteria provided, single submitter                  | VCV000384177 | 20               | 49374622       | 384177      | 378313      | rs1057521887 | LOF        | 0.837    | 0.078        | 0.085    |
| KCNB1 | 313 | H   | Y   | NM_004975.4(KCNB1):c.937C>T (p.His313Tyr) | not provided                                                                                                                                                                                                                                                                                                         | Pathogenic(Last reviewed: Oct 12, 2020)                                   | criteria provided, single submitter                  | VCV000451654 | 20               | 49374623       | 451654      | 446265      | rs918313461  | LOF        | 0.827    | 0.075        | 0.097    |
| KCNB1 | 314 | S   | A   | NM_004975.4(KCNB1):c.940T>G (p.Ser314Ala) | not provided                                                                                                                                                                                                                                                                                                         | Likely pathogenic(Last reviewed: Jul 1, 2019)                             | criteria provided, single submitter                  | VCV000872733 | 20               | 49374620       | 872733      | 860651      | rs1984260160 | LOF        | 0.854    | 0.066        | 0.08     |
| KCNB1 | 319 | S   | F   | NM_004975.4(KCNB1):c.956C>T (p.Ser319Phe) | Early infantile epileptic encephalopathy with suppression bursts                                                                                                                                                                                                                                                     | Likely pathogenic(Last reviewed: Dec 1, 2019)                             | no assertion criteria provided                       | VCV000973169 | 20               | 49374604       | 973169      | 961494      | rs1984259606 | LOF        | 0.679    | 0.13         | 0.191    |
| KCNB1 | 319 | S   | Y   | NM_004975.4(KCNB1):c.956C>A (p.Ser319Tyr) | Epileptic encephalopathy, early infantile, 26                                                                                                                                                                                                                                                                        | Likely pathogenic(Last reviewed: Jun 26, 2020)                            | criteria provided, single submitter                  | VCV001067365 | 20               | 49374604       | 1067365     | 1056615     | NA           | LOF        | 0.68     | 0.143        | 0.176    |
| KCNB1 | 321 | G   | S   | NM_004975.4(KCNB1):c.961G>A (p.Gly321Ser) | Epileptic encephalopathy, early infantile, 26                                                                                                                                                                                                                                                                        | Likely pathogenic(Last reviewed: Apr 8, 2020)                             | criteria provided, single submitter                  | VCV001068345 | 20               | 49374599       | 1068345     | 1056614     | NA           | Neutral    | 0.691    | 0.191        | 0.118    |
| KCNB1 | 323 | T   | I   | NM_004975.4(KCNB1):c.968C>T (p.Thr323Ile) | Epileptic encephalopathy                                                                                                                                                                                                                                                                                             | Likely pathogenic(Last reviewed: Mar 1, 2019)                             | criteria provided, single submitter                  | VCV000633622 | 20               | 49374592       | 633622      | 622066      | rs1569017257 | LOF        | 0.693    | 0.135        | 0.172    |
| KCNB1 | 325 | R   | Q   | NM_004975.4(KCNB1):c.974G>A (p.Arg325Gln) | Epileptic encephalopathy, early infantile, 26                                                                                                                                                                                                                                                                        | Uncertain significance(Last reviewed: Apr 14, 2020)                       | criteria provided, single submitter                  | VCV001041245 | 20               | 49374586       | 1041245     | 1034744     | rs759765009  | Neutral    | 0.439    | 0.396        | 0.165    |
| KCNB1 | 325 | R   | W   | NM_004975.4(KCNB1):c.973C>T (p.Arg325Trp) | Inborn genetic diseases not provided                                                                                                                                                                                                                                                                                 | Conflicting interpretations of pathogenicity(Last reviewed: Jul 16, 2019) | criteria provided, conflicting interpretations       | VCV000985215 | 20               | 49374587       | 985215      | 974197      | rs1276378675 | GOF        | 0.443    | 0.197        | 0.359    |
| KCNB1 | 329 | N   | S   | NM_004975.4(KCNB1):c.986A>G (p.Asn329Ser) | Epileptic encephalopathy, early infantile, 26                                                                                                                                                                                                                                                                        | Conflicting interpretations of pathogenicity(Last reviewed: Jul 22, 2021) | criteria provided, conflicting interpretations       | VCV000959038 | 20               | 49374574       | 959038      | 951127      | rs1984257387 | Neutral    | 0.643    | 0.233        | 0.124    |
| KCNB1 | 330 | E   | D   | NM_004975.4(KCNB1):c.990G>C (p.Glu330Asp) | not provided                                                                                                                                                                                                                                                                                                         | Likely pathogenic(Last reviewed: Oct 3, 2015)                             | criteria provided, single submitter                  | VCV000429607 | 20               | 49374570       | 429607      | 422323      | rs1131691489 | Neutral    | 0.652    | 0.231        | 0.117    |
| KCNB1 | 330 | E   | K   | NM_004975.4(KCNB1):c.988G>A (p.Glu330Lys) | Inborn genetic diseases                                                                                                                                                                                                                                                                                              | Likely pathogenic(Last reviewed: Mar 17, 2017)                            | criteria provided, single submitter                  | VCV000521643 | 20               | 49374572       | 521643      | 512459      | rs1555889114 | Neutral    | 0.643    | 0.234        | 0.123    |
| KCNB1 | 332 | G   | V   | NM_004975.4(KCNB1):c.995G>T (p.Gly332Val) | not provided                                                                                                                                                                                                                                                                                                         | Likely                                                                    | criteria                                             | VCV000451423 | 20               | 49374565       | 451423      | 446264      | rs1555889110 | LOF        | 0.876    | 0.053        | 0.071    |



| gene  | pos | aa1 | aa2 | Name                                       | Condition(s)                                                               | Clinical significance (Last reviewed)                                    | Review status                                        | Accession    | GRCh38Chromosome | GRCh38Location | VariationID | AlleleID(s) | dbSNP ID     | prediction | prob.LOF | prob.Neutral | prob.GOF |
|-------|-----|-----|-----|--------------------------------------------|----------------------------------------------------------------------------|--------------------------------------------------------------------------|------------------------------------------------------|--------------|------------------|----------------|-------------|-------------|--------------|------------|----------|--------------|----------|
|       |     |     |     |                                            |                                                                            | pathogenic(Last reviewed: Jan 13, 2021)                                  | provided, multiple submitters, no conflicts          |              |                  |                |             |             |              |            |          |              |          |
| KCNB1 | 334 | L   | P   | NM_004975.4(KCNB1):c.1001T>C (p.Leu334Pro) | Epileptic encephalopathy Epileptic encephalopathy, early infantile, 26     | Likely pathogenic(Last reviewed: Mar 1, 2019)                            | criteria provided, multiple submitters, no conflicts | VCV000559895 | 20               | 49374559       | 559895      | 550642      | rs1555889108 | LOF        | 0.872    | 0.061        | 0.067    |
| KCNB1 | 336 | L   | F   | NM_004975.4(KCNB1):c.1006C>T (p.Leu336Phe) | Epileptic encephalopathy, early infantile, 26                              | Uncertain significance(Last reviewed: Feb 2, 2020)                       | criteria provided, single submitter                  | VCV001057172 | 20               | 49374554       | 1057172     | 1051740     | NA           | LOF        | 0.862    | 0.058        | 0.08     |
| KCNB1 | 339 | A   | P   | NM_004975.4(KCNB1):c.1015G>C (p.Ala339Pro) | Epileptic encephalopathy, early infantile, 26                              | Uncertain significance(Last reviewed: Feb 17, 2019)                      | criteria provided, single submitter                  | VCV000860413 | 20               | 49374545       | 860413      | 848475      | rs1984255406 | LOF        | 0.864    | 0.071        | 0.066    |
| KCNB1 | 347 | S   | R   | NM_004975.4(KCNB1):c.1041C>G (p.Ser347Arg) | Epileptic encephalopathy Epileptic encephalopathy, early infantile, 26     | Pathogenic(Last reviewed: Sep 19, 2020)                                  | criteria provided, multiple submitters, no conflicts | VCV000475255 | 20               | 49374519       | 475255      | 470956      | NA           | LOF        | 0.859    | 0.049        | 0.092    |
| KCNB1 | 347 | S   | R   | NM_004975.4(KCNB1):c.1041C>G (p.Ser347Arg) | Epileptic encephalopathy Epileptic encephalopathy, early infantile, 26     | Pathogenic(Last reviewed: Sep 19, 2020)                                  | criteria provided, multiple submitters, no conflicts | VCV000475255 | 20               | 49374519       | 475255      | 470956      | NA           | LOF        | 0.859    | 0.049        | 0.092    |
| KCNB1 | 347 | S   | R   | NM_004975.4(KCNB1):c.1041C>A (p.Ser347Arg) | Inborn genetic diseases Epileptic encephalopathy, early infantile, 26      | Pathogenic/Likely pathogenic(Last reviewed: Mar 2, 2018)                 | criteria provided, multiple submitters, no conflicts | VCV000156533 | 20               | 49374519       | 156533      | 166304      | rs587777848  | LOF        | 0.859    | 0.049        | 0.092    |
| KCNB1 | 347 | S   | R   | NM_004975.4(KCNB1):c.1041C>A (p.Ser347Arg) | Inborn genetic diseases Epileptic encephalopathy, early infantile, 26      | Pathogenic/Likely pathogenic(Last reviewed: Mar 2, 2018)                 | criteria provided, multiple submitters, no conflicts | VCV000156533 | 20               | 49374519       | 156533      | 166304      | rs587777848  | LOF        | 0.859    | 0.049        | 0.092    |
| KCNB1 | 349 | V   | F   | NM_004975.4(KCNB1):c.1045G>T (p.Val349Phe) | Epileptic encephalopathy, early infantile, 26 <br>Epileptic encephalopathy | Pathogenic(Last reviewed: Oct 29, 2019)                                  | criteria provided, multiple submitters, no conflicts | VCV000633624 | 20               | 49374515       | 633624      | 622064      | rs1569017205 | LOF        | 0.861    | 0.055        | 0.084    |
| KCNB1 | 351 | F   | S   | NM_004975.4(KCNB1):c.1052T>C (p.Phe351Ser) | Epileptic encephalopathy, early infantile, 26                              | Uncertain significance(Last reviewed: Jul 13, 2020)                      | criteria provided, single submitter                  | VCV001055078 | 20               | 49374508       | 1055078     | 1051739     | NA           | LOF        | 0.867    | 0.066        | 0.067    |
| KCNB1 | 353 | E   | K   | NM_004975.4(KCNB1):c.1057G>A (p.Glu353Lys) | not provided                                                               | Likely pathogenic(Last reviewed: Jan 26, 2017)                           | criteria provided, single submitter                  | VCV000392897 | 20               | 49374503       | 392897      | 377080      | rs1057524688 | LOF        | 0.861    | 0.063        | 0.076    |
| KCNB1 | 367 | S   | F   | NM_004975.4(KCNB1):c.1100C>T (p.Ser367Phe) | Inborn genetic diseases                                                    | Likely pathogenic(Last reviewed: Nov 23, 2018)                           | criteria provided, single submitter                  | VCV000985970 | 20               | 49374460       | 985970      | 974196      | rs1984252463 | LOF        | 0.867    | 0.043        | 0.09     |
| KCNB1 | 369 | W   | R   | NM_004975.4(KCNB1):c.1105T>C (p.Trp369Arg) | Epileptic encephalopathy, early infantile, 26 <br>Epileptic encephalopathy | Conflicting interpretations of pathogenicity(Last reviewed: Mar 1, 2019) | criteria provided, conflicting interpretations       | VCV000633625 | 20               | 49374455       | 633625      | 622063      | rs1569017174 | LOF        | 0.865    | 0.063        | 0.071    |
| KCNB1 | 370 | W   | R   | NM_004975.4(KCNB1):c.1108T>C (p.Trp370Arg) | not provided                                                               | Pathogenic(Last reviewed: May 3, 2016)                                   | criteria provided, single submitter                  | VCV000280560 | 20               | 49374452       | 280560      | 264751      | rs886041743  | LOF        | 0.864    | 0.054        | 0.082    |

| gene  | pos | aa1 | aa2 | Name                                       | Condition(s)                                                           | Clinical significance (Last reviewed)                                    | Review status                                        | Accession    | GRCh38Chromosome | GRCh38Location | VariationID | AlleleID(s) | dbSNP ID     | prediction | prob.LOF | prob.Neutral | prob.GOF |
|-------|-----|-----|-----|--------------------------------------------|------------------------------------------------------------------------|--------------------------------------------------------------------------|------------------------------------------------------|--------------|------------------|----------------|-------------|-------------|--------------|------------|----------|--------------|----------|
| KCNB1 | 372 | T   | I   | NM_004975.4(KCNB1):c.1115C>T (p.Thr372Ile) | Intellectual disability                                                | Pathogenic(Last reviewed: Mar 1, 2019)                                   | criteria provided, single submitter                  | VCV000633626 | 20               | 49374445       | 633626      | 622061      | rs1569017160 | LOF        | 0.84     | 0.056        | 0.104    |
| KCNB1 | 372 | T   | N   | NM_004975.4(KCNB1):c.1115C>A (p.Thr372Asn) | Intellectual disability                                                | Likely pathogenic(Last reviewed: Mar 1, 2019)                            | criteria provided, single submitter                  | VCV000633627 | 20               | 49374445       | 633627      | 622062      | rs1569017160 | LOF        | 0.854    | 0.066        | 0.08     |
| KCNB1 | 374 | T   | I   | NM_004975.4(KCNB1):c.1121C>T (p.Thr374Ile) | Epileptic encephalopathy, early infantile, 26(not provided)            | Pathogenic(Last reviewed: Nov 12, 2018)                                  | criteria provided, single submitter                  | VCV000156534 | 20               | 49374439       | 156534      | 166305      | rs587777849  | LOF        | 0.857    | 0.048        | 0.095    |
| KCNB1 | 375 | M   | V   | NM_004975.4(KCNB1):c.1123A>G (p.Met375Val) | Epileptic encephalopathy, early infantile, 26                          | Uncertain significance(Last reviewed: Jul 8, 2019)                       | criteria provided, single submitter                  | VCV000957470 | 20               | 49374437       | 957470      | 951126      | rs1984250919 | LOF        | 0.861    | 0.058        | 0.081    |
| KCNB1 | 377 | T   | I   | NM_004975.4(KCNB1):c.1130C>T (p.Thr377Ile) | Epileptic encephalopathy, early infantile, 26                          | Uncertain significance(Last reviewed: Aug 8, 2019)                       | criteria provided, single submitter                  | VCV000941236 | 20               | 49374430       | 941236      | 939004      | rs1569017148 | LOF        | 0.868    | 0.047        | 0.086    |
| KCNB1 | 377 | T   | N   | NM_004975.4(KCNB1):c.1130C>A (p.Thr377Asn) | Epileptic encephalopathy                                               | Pathogenic(Last reviewed: Mar 1, 2019)                                   | criteria provided, single submitter                  | VCV000633628 | 20               | 49374430       | 633628      | 622060      | rs1569017148 | LOF        | 0.878    | 0.049        | 0.074    |
| KCNB1 | 378 | V   | A   | NM_004975.4(KCNB1):c.1133T>C (p.Val378Ala) | not provided                                                           | Pathogenic(Last reviewed: Dec 1, 2017)                                   | criteria provided, single submitter                  | VCV000872732 | 20               | 49374427       | 872732      | 860650      | rs1984250089 | LOF        | 0.872    | 0.047        | 0.081    |
| KCNB1 | 378 | V   | L   | NM_004975.4(KCNB1):c.1132G>C (p.Val378Leu) | not provided Epileptic encephalopathy                                  | Pathogenic(Last reviewed: Oct 1, 2020)                                   | criteria provided, multiple submitters, no conflicts | VCV000633629 | 20               | 49374428       | 633629      | 622059      | rs1569017143 | LOF        | 0.856    | 0.048        | 0.096    |
| KCNB1 | 379 | G   | E   | NM_004975.4(KCNB1):c.1136G>A (p.Gly379Glu) | not provided                                                           | Pathogenic(Last reviewed: Aug 12, 2019)                                  | criteria provided, single submitter                  | VCV001199933 | 20               | 49374424       | 1199933     | 1192247     | NA           | LOF        | 0.872    | 0.047        | 0.08     |
| KCNB1 | 379 | G   | R   | NM_004975.4(KCNB1):c.1135G>A (p.Gly379Arg) | Epileptic encephalopathy, early infantile, 26                          | Pathogenic(Last reviewed: Oct 1, 2014)                                   | no assertion criteria provided                       | VCV000156535 | 20               | 49374425       | 156535      | 166306      | rs587777850  | LOF        | 0.858    | 0.046        | 0.096    |
| KCNB1 | 379 | G   | V   | NM_004975.4(KCNB1):c.1136G>T (p.Gly379Val) | Epileptic encephalopathy, early infantile, 26                          | Pathogenic(Last reviewed: Nov 19, 2018)                                  | criteria provided, single submitter                  | VCV001031489 | 20               | 49374424       | 1031489     | 1022009     | rs1984249721 | LOF        | 0.878    | 0.045        | 0.077    |
| KCNB1 | 380 | Y   | C   | NM_004975.4(KCNB1):c.1139A>G (p.Tyr380Cys) | Epileptic encephalopathy, early infantile, 26 Epileptic encephalopathy | Conflicting interpretations of pathogenicity(Last reviewed: Mar 1, 2019) | criteria provided, conflicting interpretations       | VCV000633630 | 20               | 49374421       | 633630      | 622058      | rs1569017123 | LOF        | 0.869    | 0.06         | 0.072    |
| KCNB1 | 381 | G   | E   | NM_004975.4(KCNB1):c.1142G>A (p.Gly381Glu) | Epileptic encephalopathy, early infantile, 26                          | Pathogenic(Last reviewed: May 12, 2018)                                  | criteria provided, single submitter                  | VCV000576946 | 20               | 49374418       | 576946      | 572937      | rs1569017114 | LOF        | 0.87     | 0.048        | 0.081    |
| KCNB1 | 382 | D   | H   | NM_004975.4(KCNB1):c.1144G>C (p.Asp382His) | not provided                                                           | Pathogenic(Last reviewed: Aug 15, 2017)                                  | criteria provided, single submitter                  | VCV000451018 | 20               | 49374416       | 451018      | 446263      | rs1555889090 | LOF        | 0.866    | 0.063        | 0.071    |
| KCNB1 | 382 | D   | N   | NM_004975.4(KCNB1):c.1144G>A (p.Asp382Asn) | Epileptic encephalopathy                                               | Likely pathogenic(Last reviewed: Mar 1, 2019)                            | criteria provided, single submitter                  | VCV000633631 | 20               | 49374416       | 633631      | 622057      | rs1555889090 | LOF        | 0.866    | 0.067        | 0.067    |
| KCNB1 | 382 | D   | V   | NM_004975.4(KCNB1):c.1145A>T (p.Asp382Val) | Epileptic encephalopathy, early infantile, 26                          | Likely pathogenic(Last reviewed: Nov 14, 2019)                           | criteria provided, single submitter                  | VCV000943655 | 20               | 49374415       | 943655      | 939003      | rs1984248540 | LOF        | 0.866    | 0.064        | 0.071    |
| KCNB1 | 385 | P   | L   | NM_004975.4(KCNB1):c.1154C>T (p.Pro385Leu) | not provided                                                           | Uncertain significance(Last reviewed: Jun 27, 2019)                      | criteria provided, single submitter                  | VCV001302569 | 20               | 49374406       | 1302569     | 1292850     | NA           | LOF        | 0.878    | 0.05         | 0.072    |

| gene  | pos | aa1 | aa2 | Name                                       | Condition(s)                                                                                                    | Clinical significance (Last reviewed)                                     | Review status                                        | Accession    | GRCh38Chromosome | GRCh38Location | VariationID | AlleleID(s) | dbSNP ID     | prediction | prob.LOF | prob.Neutral | prob.GOF |
|-------|-----|-----|-----|--------------------------------------------|-----------------------------------------------------------------------------------------------------------------|---------------------------------------------------------------------------|------------------------------------------------------|--------------|------------------|----------------|-------------|-------------|--------------|------------|----------|--------------|----------|
| KCNB1 | 385 | P   | T   | NM_004975.4(KCNB1):c.1153C>A (p.Pro385Thr) | Epileptic encephalopathy, early infantile, 26  Early infantile epileptic encephalopathy with suppression bursts | Pathogenic/Likely pathogenic(Last reviewed: Dec 1, 2019)                  | no assertion criteria provided                       | VCV000417907 | 20               | 49374407       | 417907      | 404843      | rs1060499592 | LOF        | 0.883    | 0.047        | 0.071    |
| KCNB1 | 394 | G   | R   | NM_004975.4(KCNB1):c.1180G>A (p.Gly394Arg) | Epileptic encephalopathy                                                                                        | Likely pathogenic(Last reviewed: Mar 1, 2019)                             | criteria provided, single submitter                  | VCV000633632 | 20               | 49374380       | 633632      | 622056      | rs1569017073 | LOF        | 0.883    | 0.044        | 0.073    |
| KCNB1 | 395 | G   | R   | NM_004975.4(KCNB1):c.1183G>A (p.Gly395Arg) | Epileptic encephalopathy, early infantile, 26  Intellectual disability Epileptic encephalopathy                 | Conflicting interpretations of pathogenicity(Last reviewed: Aug 3, 2020)  | criteria provided, conflicting interpretations       | VCV000545438 | 20               | 49374377       | 545438      | 535710      | rs959316981  | LOF        | 0.862    | 0.055        | 0.083    |
| KCNB1 | 397 | C   | F   | NM_004975.4(KCNB1):c.1190G>T (p.Cys397Phe) | Epileptic encephalopathy, early infantile, 26                                                                   | Likely pathogenic(Last reviewed: Oct 19, 2020)                            | no assertion criteria provided                       | VCV000984381 | 20               | 49374370       | 984381      | 972450      | NA           | LOF        | 0.873    | 0.055        | 0.072    |
| KCNB1 | 397 | C   | Y   | NM_004975.4(KCNB1):c.1190G>A (p.Cys397Tyr) | Epileptic encephalopathy, early infantile, 26 not provided                                                      | Conflicting interpretations of pathogenicity(Last reviewed: Jul 11, 2018) | criteria provided, conflicting interpretations       | VCV000452347 | 20               | 49374370       | 452347      | 446262      | rs1555889084 | LOF        | 0.875    | 0.052        | 0.073    |
| KCNB1 | 401 | G   | R   | NM_004975.4(KCNB1):c.1201G>A (p.Gly401Arg) | Epileptic encephalopathy                                                                                        | Pathogenic(Last reviewed: Mar 1, 2019)                                    | criteria provided, single submitter                  | VCV000633633 | 20               | 49374359       | 633633      | 622055      | rs1569017045 | LOF        | 0.87     | 0.046        | 0.084    |
| KCNB1 | 402 | V   | A   | NM_004975.4(KCNB1):c.1205T>C (p.Val402Ala) | Epileptic encephalopathy, early infantile, 26                                                                   | Uncertain significance(Last reviewed: Jun 22, 2018)                       | criteria provided, single submitter                  | VCV001031490 | 20               | 49374355       | 1031490     | 1022008     | rs1984245487 | LOF        | 0.875    | 0.058        | 0.068    |
| KCNB1 | 404 | V   | M   | NM_004975.4(KCNB1):c.1210G>A (p.Val404Met) | Epileptic encephalopathy, early infantile, 26                                                                   | Uncertain significance(Last reviewed: Nov 26, 2019)                       | criteria provided, single submitter                  | VCV000857377 | 20               | 49374350       | 857377      | 848474      | rs1984244898 | LOF        | 0.867    | 0.057        | 0.077    |
| KCNB1 | 406 | A   | V   | NM_004975.4(KCNB1):c.1217C>T (p.Ala406Val) | Epileptic encephalopathy, early infantile, 26                                                                   | Likely pathogenic(Last reviewed: Feb 14, 2020)                            | criteria provided, multiple submitters, no conflicts | VCV000659148 | 20               | 49374343       | 659148      | 648762      | rs1601071099 | LOF        | 0.872    | 0.053        | 0.074    |
| KCNB1 | 408 | P   | S   | NM_004975.4(KCNB1):c.1222C>T (p.Pro408Ser) | Epileptic encephalopathy, early infantile, 26                                                                   | Likely pathogenic(Last reviewed: Sep 26, 2019)                            | no assertion criteria provided                       | VCV000800948 | 20               | 49374338       | 800948      | 788939      | rs1601071085 | LOF        | 0.883    | 0.059        | 0.058    |
| KCNB1 | 409 | I   | T   | NM_004975.4(KCNB1):c.1226T>C (p.Ile409Thr) | Intellectual disability                                                                                         | Likely pathogenic(Last reviewed: Mar 1, 2019)                             | criteria provided, single submitter                  | VCV000633634 | 20               | 49374334       | 633634      | 622054      | rs1569017025 | LOF        | 0.877    | 0.065        | 0.058    |
| KCNB1 | 413 | V   | I   | NM_004975.4(KCNB1):c.1237G>A (p.Val413Ile) | Epileptic encephalopathy, early infantile, 26                                                                   | Conflicting interpretations of pathogenicity(Last reviewed: Sep 9, 2020)  | criteria provided, conflicting interpretations       | VCV000982681 | 20               | 49374323       | 982681      | 971146      | rs1984243311 | LOF        | 0.846    | 0.068        | 0.086    |
| KCNB1 | 414 | N   | D   | NM_004975.4(KCNB1):c.1240A>G (p.Asn414Asp) | Marfanoid habitus and intellectual disability                                                                   | Likely pathogenic                                                         | criteria provided, single submitter                  | VCV000689696 | 20               | 49374320       | 689696      | 677391      | rs1601071071 | LOF        | 0.815    | 0.102        | 0.083    |
| KCNB1 | 416 | F   | L   | NM_004975.4(KCNB1):c.1248C>A (p.Phe416Leu) | Epileptic encephalopathy                                                                                        | Pathogenic(Last reviewed: Mar 1, 2019)                                    | criteria provided, single submitter                  | VCV000633635 | 20               | 49374312       | 633635      | 622053      | rs1569017015 | LOF        | 0.84     | 0.067        | 0.093    |
| KCNB1 | 416 | F   | L   | NM_004975.4(KCNB1):c.1248C>A (p.Phe416Leu) | Epileptic encephalopathy                                                                                        | Pathogenic(Last reviewed: Mar 1, 2019)                                    | criteria provided, single submitter                  | VCV000633635 | 20               | 49374312       | 633635      | 622053      | rs1569017015 | LOF        | 0.84     | 0.067        | 0.093    |
| KCNB1 | 416 | F   | L   | NM_004975.4(KCNB1):c.1246T>C               | Epileptic encephalopathy, early infantile, 26                                                                   | Likely                                                                    | criteria                                             | VCV000859281 | 20               | 49374314       | 859281      | 848473      | rs1984242860 | LOF        | 0.84     | 0.067        | 0.093    |

| gene  | pos | aa1 | aa2 | Name                                       | Condition(s)                                               | Clinical significance (Last reviewed)               | Review status                                        | Accession    | GRCh38Chromosome | GRCh38Location | VariationID | AlleleID(s) | dbSNP ID     | prediction | prob.LOF | prob.Neutral | prob.GOF |
|-------|-----|-----|-----|--------------------------------------------|------------------------------------------------------------|-----------------------------------------------------|------------------------------------------------------|--------------|------------------|----------------|-------------|-------------|--------------|------------|----------|--------------|----------|
|       |     |     |     | (p.Phe416Leu)                              |                                                            | pathogenic(Last reviewed: Dec 24, 2019)             | provided, single submitter                           |              |                  |                |             |             |              |            |          |              |          |
| KCNB1 | 416 | F   | L   | NM_004975.4(KCNB1):c.1246T>C (p.Phe416Leu) | Epileptic encephalopathy, early infantile, 26              | Likely pathogenic(Last reviewed: Dec 24, 2019)      | criteria provided, single submitter                  | VCV000859281 | 20               | 49374314       | 859281      | 848473      | rs1984242860 | LOF        | 0.84     | 0.067        | 0.093    |
| KCNB1 | 417 | S   | P   | NM_004975.4(KCNB1):c.1249T>C (p.Ser417Pro) | Epileptic encephalopathy, early infantile, 26              | Uncertain significance(Last reviewed: Aug 29, 2020) | criteria provided, single submitter                  | VCV001052355 | 20               | 49374311       | 1052355     | 1051738     | NA           | LOF        | 0.847    | 0.071        | 0.082    |
| KCNB1 | 422 | E   | A   | NM_004975.4(KCNB1):c.1265A>C (p.Glu422Ala) | not provided                                               | Likely pathogenic(Last reviewed: Dec 13, 2017)      | criteria provided, single submitter                  | VCV000421307 | 20               | 49374295       | 421307      | 410767      | rs1064795048 | LOF        | 0.745    | 0.151        | 0.104    |
| KCNB1 | 422 | E   | D   | NM_004975.4(KCNB1):c.1266G>C (p.Glu422Asp) | Epileptic encephalopathy, early infantile, 26              | Uncertain significance(Last reviewed: May 23, 2018) | criteria provided, single submitter                  | VCV000626121 | 20               | 49374294       | 626121      | 614475      | rs755843579  | LOF        | 0.741    | 0.162        | 0.097    |
| KCNB1 | 432 | R   | W   | NM_004975.4(KCNB1):c.1294C>T (p.Arg432Trp) | Epileptic encephalopathy, early infantile, 26              | Likely benign(Last reviewed: Aug 20, 2019)          | criteria provided, single submitter                  | VCV000833960 | 20               | 49374266       | 833960      | 822171      | rs752596402  | Neutral    | 0.658    | 0.198        | 0.144    |
| KCNB1 | 446 | V   | I   | NM_004975.4(KCNB1):c.1336G>A (p.Val446Ile) | not provided Epileptic encephalopathy, early infantile, 26 | Likely benign(Last reviewed: Sep 19, 2020)          | criteria provided, single submitter                  | VCV000580254 | 20               | 49374224       | 580254      | 572935      | rs776968332  | LOF        | 0.785    | 0.12         | 0.095    |
| KCNB1 | 448 | M   | I   | NM_004975.4(KCNB1):c.1344G>A (p.Met448Ile) | Epileptic encephalopathy, early infantile, 26              | Likely benign(Last reviewed: Nov 20, 2019)          | criteria provided, single submitter                  | VCV000833523 | 20               | 49374216       | 833523      | 822170      | rs1984239766 | LOF        | 0.692    | 0.109        | 0.198    |
| KCNB1 | 449 | N   | D   | NM_004975.4(KCNB1):c.1345A>G (p.Asn449Asp) | Epileptic encephalopathy, early infantile, 26              | Uncertain significance(Last reviewed: Sep 29, 2019) | criteria provided, single submitter                  | VCV000953558 | 20               | 49374215       | 953558      | 951125      | rs1984239652 | GOF        | 0.644    | 0.099        | 0.258    |
| KCNB1 | 452 | D   | G   | NM_004975.4(KCNB1):c.1355A>G (p.Asp452Gly) | Epileptic encephalopathy, early infantile, 26              | Uncertain significance(Last reviewed: Jun 19, 2019) | criteria provided, single submitter                  | VCV000948656 | 20               | 49374205       | 948656      | 929220      | rs760931963  | LOF        | 0.692    | 0.109        | 0.199    |
| KCNB1 | 456 | R   | G   | NM_004975.4(KCNB1):c.1366C>G (p.Arg456Gly) | Epileptic encephalopathy, early infantile, 26 not provided | Uncertain significance(Last reviewed: Dec 30, 2021) | criteria provided, multiple submitters, no conflicts | VCV000934441 | 20               | 49374194       | 934441      | 939002      | rs368043123  | LOF        | 0.71     | 0.114        | 0.176    |
| KCNB1 | 456 | R   | Q   | NM_004975.4(KCNB1):c.1367G>A (p.Arg456Gln) | Epileptic encephalopathy, early infantile, 26 not provided | Benign/Likely benign(Last reviewed: Jun 2, 2021)    | criteria provided, multiple submitters, no conflicts | VCV000385978 | 20               | 49374193       | 385978      | 377076      | rs761082551  | GOF        | 0.661    | 0.102        | 0.237    |
| KCNB1 | 457 | S   | R   | NM_004975.4(KCNB1):c.1371C>G (p.Ser457Arg) | not provided                                               | Uncertain significance(Last reviewed: Apr 13, 2020) | criteria provided, single submitter                  | VCV001190347 | 20               | 49374189       | 1190347     | 1181870     | NA           | GOF        | 0.467    | 0.062        | 0.471    |
| KCNB1 | 463 | I   | T   | NM_004975.4(KCNB1):c.1388T>C (p.Ile463Thr) | Epileptic encephalopathy, early infantile, 26 not provided | Benign/Likely benign(Last reviewed: Dec 4, 2020)    | criteria provided, multiple submitters, no conflicts | VCV000475257 | 20               | 49374172       | 475257      | 470948      | rs145421532  | GOF        | 0.671    | 0.104        | 0.225    |
| KCNB1 | 465 | V   | I   | NM_004975.4(KCNB1):c.1393G>A (p.Val465Ile) | Epileptic encephalopathy, early infantile, 26              | Likely benign(Last reviewed: Mar 6, 2020)           | criteria provided, single submitter                  | VCV000568029 | 20               | 49374167       | 568029      | 571291      | rs1294696493 | LOF        | 0.699    | 0.111        | 0.19     |
| KCNB1 | 466 | E   | D   | NM_004975.4(KCNB1):c.1398G>C (p.Glu466Asp) | Intellectual disability                                    | Likely benign(Last reviewed: Jan 1, 2019)           | no assertion criteria provided                       | VCV000975410 | 20               | 49374162       | 975410      | 963909      | rs1984236966 | LOF        | 0.689    | 0.109        | 0.202    |

| gene  | pos | aa1 | aa2 | Name                                       | Condition(s)                                                | Clinical significance (Last reviewed)                                    | Review status                                        | Accession    | GRCh38Chromosome | GRCh38Location | VariationID | AlleleID(s) | dbSNP ID     | prediction | prob.LOF | prob.Neutral | prob.GOF |
|-------|-----|-----|-----|--------------------------------------------|-------------------------------------------------------------|--------------------------------------------------------------------------|------------------------------------------------------|--------------|------------------|----------------|-------------|-------------|--------------|------------|----------|--------------|----------|
| KCNB1 | 482 | H   | N   | NM_004975.4(KCNB1):c.1444C>A (p.His482Asn) | Epileptic encephalopathy, early infantile, 26               | Uncertain significance(Last reviewed: Mar 26, 2020)                      | criteria provided, single submitter                  | VCV001017488 | 20               | 49374116       | 1017488     | 1014171     | rs1171133807 | Neutral    | 0.692    | 0.197        | 0.111    |
| KCNB1 | 482 | H   | Q   | NM_004975.4(KCNB1):c.1446C>A (p.His482Gln) | Epileptic encephalopathy, early infantile, 26               | Uncertain significance(Last reviewed: Oct 21, 2019)                      | criteria provided, single submitter                  | VCV000970573 | 20               | 49374114       | 970573      | 958857      | rs750701951  | Neutral    | 0.691    | 0.197        | 0.112    |
| KCNB1 | 486 | N   | K   | NM_004975.4(KCNB1):c.1458C>G (p.Asn486Lys) | Epileptic encephalopathy, early infantile, 26               | Uncertain significance(Last reviewed: Sep 7, 2018)                       | criteria provided, single submitter                  | VCV000665812 | 20               | 49374102       | 665812      | 648761      | rs1388412501 | Neutral    | 0.655    | 0.22         | 0.124    |
| KCNB1 | 502 | K   | N   | NM_004975.4(KCNB1):c.1506G>T (p.Lys502Asn) | Epileptic encephalopathy, early infantile, 26               | Likely benign(Last reviewed: Oct 28, 2020)                               | criteria provided, single submitter                  | VCV001145952 | 20               | 49374054       | 1145952     | 1149512     | NA           | Neutral    | 0.65     | 0.228        | 0.123    |
| KCNB1 | 510 | G   | V   | NM_004975.4(KCNB1):c.1529G>T (p.Gly510Val) | Epileptic encephalopathy, early infantile, 26               | Uncertain significance(Last reviewed: Dec 4, 2019)                       | criteria provided, single submitter                  | VCV000864105 | 20               | 49374031       | 864105      | 848472      | rs767889610  | Neutral    | 0.668    | 0.214        | 0.118    |
| KCNB1 | 517 | S   | L   | NM_004975.4(KCNB1):c.1550C>T (p.Ser517Leu) | Epileptic encephalopathy, early infantile, 26(not provided) | Conflicting interpretations of pathogenicity(Last reviewed: Oct 5, 2020) | criteria provided, conflicting interpretations       | VCV001169000 | 20               | 49374010       | 1169000     | 1158896     | NA           | Neutral    | 0.659    | 0.218        | 0.123    |
| KCNB1 | 526 | V   | I   | NM_004975.4(KCNB1):c.1576G>A (p.Val526Ile) | Epileptic encephalopathy, early infantile, 26(not provided) | Benign(Last reviewed: Nov 29, 2020)                                      | criteria provided, multiple submitters, no conflicts | VCV000382765 | 20               | 49373984       | 382765      | 378112      | rs140932636  | Neutral    | 0.704    | 0.191        | 0.105    |
| KCNB1 | 532 | M   | V   | NM_004975.4(KCNB1):c.1594A>G (p.Met532Val) | Epileptic encephalopathy, early infantile, 26               | Uncertain significance(Last reviewed: Feb 14, 2020)                      | criteria provided, single submitter                  | VCV000870207 | 20               | 49373966       | 870207      | 858356      | rs1984228484 | Neutral    | 0.704    | 0.192        | 0.103    |
| KCNB1 | 533 | Y   | H   | NM_004975.4(KCNB1):c.1597T>C (p.Tyr533His) | Epileptic encephalopathy, early infantile, 26               | Likely benign(Last reviewed: Sep 25, 2019)                               | criteria provided, single submitter                  | VCV000833544 | 20               | 49373963       | 833544      | 822169      | rs1984228232 | Neutral    | 0.71     | 0.193        | 0.098    |
| KCNB1 | 536 | M   | L   | NM_004975.4(KCNB1):c.1606A>T (p.Met536Leu) | Epileptic encephalopathy, early infantile, 26(not provided) | Uncertain significance(Last reviewed: Sep 25, 2020)                      | criteria provided, multiple submitters, no conflicts | VCV000938424 | 20               | 49373954       | 938424      | 939001      | rs1984227856 | Neutral    | 0.711    | 0.186        | 0.102    |
| KCNB1 | 541 | S   | Y   | NM_004975.4(KCNB1):c.1622C>A (p.Ser541Tyr) | Epileptic encephalopathy, early infantile, 26               | Likely benign(Last reviewed: Sep 19, 2019)                               | criteria provided, single submitter                  | VCV000833843 | 20               | 49373938       | 833843      | 822168      | rs374460751  | Neutral    | 0.67     | 0.208        | 0.122    |
| KCNB1 | 543 | P   | H   | NM_004975.4(KCNB1):c.1628C>A (p.Pro543His) | Epileptic encephalopathy, early infantile, 26               | Uncertain significance(Last reviewed: Jun 9, 2020)                       | criteria provided, single submitter                  | VCV001062724 | 20               | 49373932       | 1062724     | 1051737     | NA           | Neutral    | 0.648    | 0.234        | 0.118    |
| KCNB1 | 550 | S   | L   | NM_004975.4(KCNB1):c.1649C>T (p.Ser550Leu) | Epileptic encephalopathy, early infantile, 26               | Benign(Last reviewed: Aug 20, 2020)                                      | criteria provided, single submitter                  | VCV001164941 | 20               | 49373911       | 1164941     | 1158895     | NA           | Neutral    | 0.64     | 0.235        | 0.124    |
| KCNB1 | 552 | A   | T   | NM_004975.4(KCNB1):c.1654G>A (p.Ala552Thr) | not provided                                                | Likely benign(Last reviewed: Aug 25, 2020)                               | criteria provided, single submitter                  | VCV001215098 | 20               | 49373906       | 1215098     | 1205081     | NA           | Neutral    | 0.637    | 0.226        | 0.137    |
| KCNB1 | 552 | A   | V   | NM_004975.4(KCNB1):c.1655C>T (p.Ala552Val) | not provided Epileptic encephalopathy, early infantile, 26  | Benign/Likely benign(Last reviewed: Jul 16, 2020)                        | criteria provided, multiple submitters, no conflicts | VCV000646121 | 20               | 49373905       | 646121      | 648760      | rs370974891  | Neutral    | 0.65     | 0.218        | 0.132    |
| KCNB1 | 565 | I   | V   | NM_004975.4(KCNB1):c.1693A>G (p.Ile565Val) | Epileptic encephalopathy, early infantile, 26(not provided) | Conflicting interpretations of                                           | criteria provided,                                   | VCV000391756 | 20               | 49373867       | 391756      | 377065      | rs761452916  | Neutral    | 0.707    | 0.191        | 0.102    |

| gene  | pos | aa1 | aa2 | Name                                       | Condition(s)                                                              | Clinical significance (Last reviewed)               | Review status                                        | Accession    | GRCh38Chromosome | GRCh38Location | VariationID | AlleleID(s) | dbSNP ID     | prediction | prob.LOF | prob.Neutral | prob.GOF |
|-------|-----|-----|-----|--------------------------------------------|---------------------------------------------------------------------------|-----------------------------------------------------|------------------------------------------------------|--------------|------------------|----------------|-------------|-------------|--------------|------------|----------|--------------|----------|
|       |     |     |     |                                            |                                                                           | pathogenicity(Last reviewed: May 28, 2021)          | conflicting interpretations                          |              |                  |                |             |             |              |            |          |              |          |
| KCNB1 | 569 | V   | I   | NM_004975.4(KCNB1):c.1705G>A (p.Val569Ile) | Epileptic encephalopathy, early infantile, 26(not provided)               | Benign/Likely benign(Last reviewed: Dec 9, 2020)    | criteria provided, multiple submitters, no conflicts | VCV000653828 | 20               | 49373855       | 653828      | 648759      | rs376490656  | Neutral    | 0.67     | 0.214        | 0.116    |
| KCNB1 | 575 | R   | C   | NM_004975.4(KCNB1):c.1723C>T (p.Arg575Cys) | Epileptic encephalopathy, early infantile, 26(not provided)               | Uncertain significance(Last reviewed: Feb 21, 2020) | criteria provided, multiple submitters, no conflicts | VCV000392965 | 20               | 49373837       | 392965      | 377063      | rs947355756  | Neutral    | 0.657    | 0.219        | 0.125    |
| KCNB1 | 575 | R   | H   | NM_004975.4(KCNB1):c.1724G>A (p.Arg575His) | Epileptic encephalopathy, early infantile, 26                             | Benign(Last reviewed: Mar 6, 2020)                  | criteria provided, single submitter                  | VCV000833871 | 20               | 49373836       | 833871      | 822167      | rs544069848  | Neutral    | 0.619    | 0.251        | 0.13     |
| KCNB1 | 575 | R   | L   | NM_004975.4(KCNB1):c.1724G>T (p.Arg575Leu) | not provided                                                              | Uncertain significance(Last reviewed: Dec 17, 2019) | criteria provided, single submitter                  | VCV001311373 | 20               | 49373836       | 1311373     | 1299430     | NA           | Neutral    | 0.637    | 0.236        | 0.127    |
| KCNB1 | 576 | T   | K   | NM_004975.4(KCNB1):c.1727C>A (p.Thr576Lys) | Epileptic encephalopathy, early infantile, 26                             | Uncertain significance(Last reviewed: Jul 11, 2019) | criteria provided, single submitter                  | VCV000475258 | 20               | 49373833       | 475258      | 469411      | rs1355278265 | Neutral    | 0.655    | 0.225        | 0.121    |
| KCNB1 | 593 | S   | T   | NM_004975.4(KCNB1):c.1778G>C (p.Ser593Thr) | Epileptic encephalopathy, early infantile, 26                             | Uncertain significance(Last reviewed: Jan 18, 2020) | criteria provided, single submitter                  | VCV001055120 | 20               | 49373782       | 1055120     | 1051736     | NA           | Neutral    | 0.718    | 0.174        | 0.108    |
| KCNB1 | 613 | P   | S   | NM_004975.4(KCNB1):c.1837C>T (p.Pro613Ser) | not specified Epileptic encephalopathy, early infantile, 26(not provided) | Benign(Last reviewed: Dec 8, 2020)                  | criteria provided, multiple submitters, no conflicts | VCV000383226 | 20               | 49373723       | 383226      | 378294      | rs112735799  | Neutral    | 0.651    | 0.234        | 0.114    |
| KCNB1 | 616 | T   | I   | NM_004975.4(KCNB1):c.1847C>T (p.Thr616Ile) | Epileptic encephalopathy, early infantile, 26                             | Benign(Last reviewed: Oct 8, 2019)                  | criteria provided, single submitter                  | VCV000833862 | 20               | 49373713       | 833862      | 822166      | rs2229006    | Neutral    | 0.636    | 0.236        | 0.128    |
| KCNB1 | 616 | T   | S   | NM_004975.4(KCNB1):c.1847C>G (p.Thr616Ser) | not provided not specified Epileptic encephalopathy, early infantile, 26  | Benign(Last reviewed: Dec 4, 2020)                  | criteria provided, multiple submitters, no conflicts | VCV000380823 | 20               | 49373713       | 380823      | 378110      | rs2229006    | Neutral    | 0.623    | 0.249        | 0.128    |
| KCNB1 | 618 | G   | V   | NM_004975.4(KCNB1):c.1853G>T (p.Gly618Val) | Epileptic encephalopathy, early infantile, 26                             | Uncertain significance(Last reviewed: Nov 20, 2019) | criteria provided, single submitter                  | VCV000853160 | 20               | 49373707       | 853160      | 848471      | rs771932289  | Neutral    | 0.671    | 0.207        | 0.122    |
| KCNB1 | 621 | A   | S   | NM_004975.4(KCNB1):c.1861G>T (p.Ala621Ser) | not provided Epileptic encephalopathy, early infantile, 26                | Benign/Likely benign(Last reviewed: Jul 23, 2021)   | criteria provided, multiple submitters, no conflicts | VCV000708213 | 20               | 49373699       | 708213      | 728714      | rs201960228  | Neutral    | 0.638    | 0.232        | 0.131    |
| KCNB1 | 621 | A   | V   | NM_004975.4(KCNB1):c.1862C>T (p.Ala621Val) | not provided Epileptic encephalopathy, early infantile, 26                | Uncertain significance(Last reviewed: Dec 30, 2019) | criteria provided, multiple submitters, no conflicts | VCV000661163 | 20               | 49373698       | 661163      | 648758      | rs770069345  | Neutral    | 0.644    | 0.227        | 0.128    |
| KCNB1 | 627 | R   | L   | NM_004975.4(KCNB1):c.1880G>T (p.Arg627Leu) | Epileptic encephalopathy, early infantile, 26                             | Benign(Last reviewed: Aug 2, 2020)                  | criteria provided, single submitter                  | VCV001167105 | 20               | 49373680       | 1167105     | 1158894     | NA           | Neutral    | 0.644    | 0.232        | 0.124    |
| KCNB1 | 627 | R   | Q   | NM_004975.4(KCNB1):c.1880G>A (p.Arg627Gln) | not provided Epileptic encephalopathy, early infantile, 26                | Benign(Last reviewed: May 4, 2021)                  | criteria provided, multiple submitters, no           | VCV000392453 | 20               | 49373680       | 392453      | 379715      | rs754927664  | Neutral    | 0.632    | 0.247        | 0.121    |

| gene  | pos | aa1 | aa2 | Name                                       | Condition(s)                                                | Clinical significance (Last reviewed)               | Review status                                        | Accession    | GRCh38Chromosome | GRCh38Location | VariationID | AlleleID(s) | dbSNP ID     | prediction | prob.LOF | prob.Neutral | prob.GOF |
|-------|-----|-----|-----|--------------------------------------------|-------------------------------------------------------------|-----------------------------------------------------|------------------------------------------------------|--------------|------------------|----------------|-------------|-------------|--------------|------------|----------|--------------|----------|
|       |     |     |     |                                            |                                                             |                                                     | conflicts                                            |              |                  |                |             |             |              |            |          |              |          |
| KCNB1 | 627 | R   | W   | NM_004975.4(KCNB1):c.1879C>T (p.Arg627Trp) | Epileptic encephalopathy, early infantile, 26               | Likely benign(Last reviewed: Oct 10, 2019)          | criteria provided, single submitter                  | VCV000833641 | 20               | 49373681       | 833641      | 822165      | rs554351105  | Neutral    | 0.638    | 0.23         | 0.132    |
| KCNB1 | 631 | G   | C   | NM_004975.4(KCNB1):c.1891G>T (p.Gly631Cys) | Epileptic encephalopathy, early infantile, 26               | Likely benign(Last reviewed: May 6, 2020)           | criteria provided, single submitter                  | VCV000833954 | 20               | 49373669       | 833954      | 822164      | rs1433173706 | Neutral    | 0.687    | 0.198        | 0.115    |
| KCNB1 | 633 | S   | N   | NM_004975.4(KCNB1):c.1898G>A (p.Ser633Asn) | not provided                                                | Uncertain significance(Last reviewed: Oct 27, 2017) | criteria provided, single submitter                  | VCV000453029 | 20               | 49373662       | 453029      | 446261      | rs750807577  | Neutral    | 0.64     | 0.231        | 0.129    |
| KCNB1 | 636 | R   | T   | NM_004975.4(KCNB1):c.1907G>C (p.Arg636Thr) | Epileptic encephalopathy, early infantile, 26               | Uncertain significance(Last reviewed: Jun 21, 2020) | criteria provided, single submitter                  | VCV001053563 | 20               | 49373653       | 1053563     | 1051735     | NA           | Neutral    | 0.629    | 0.245        | 0.125    |
| KCNB1 | 645 | D   | E   | NM_004975.4(KCNB1):c.1935T>G (p.Asp645Glu) | not provided                                                | Uncertain significance(Last reviewed: Sep 20, 2019) | criteria provided, single submitter                  | VCV001219470 | 20               | 49373625       | 1219470     | 1209448     | NA           | Neutral    | 0.649    | 0.225        | 0.126    |
| KCNB1 | 646 | A   | D   | NM_004975.4(KCNB1):c.1937C>A (p.Ala646Asp) | not provided                                                | Uncertain significance(Last reviewed: Aug 1, 2019)  | criteria provided, single submitter                  | VCV000872731 | 20               | 49373623       | 872731      | 860649      | rs1247080453 | Neutral    | 0.663    | 0.21         | 0.126    |
| KCNB1 | 646 | A   | T   | NM_004975.4(KCNB1):c.1936G>A (p.Ala646Thr) | Epileptic encephalopathy, early infantile, 26               | Uncertain significance(Last reviewed: May 8, 2020)  | criteria provided, multiple submitters, no conflicts | VCV000851269 | 20               | 49373624       | 851269      | 848470      | rs1447311755 | Neutral    | 0.643    | 0.227        | 0.13     |
| KCNB1 | 654 | I   | F   | NM_004975.4(KCNB1):c.1960A>T (p.Ile654Phe) | Epileptic encephalopathy, early infantile, 26               | Uncertain significance(Last reviewed: Apr 4, 2019)  | criteria provided, single submitter                  | VCV000947824 | 20               | 49373600       | 947824      | 929219      | rs1276898684 | Neutral    | 0.689    | 0.198        | 0.113    |
| KCNB1 | 655 | E   | K   | NM_004975.4(KCNB1):c.1963G>A (p.Glu655Lys) | Epileptic encephalopathy, early infantile, 26               | Uncertain significance(Last reviewed: Dec 3, 2018)  | criteria provided, single submitter                  | VCV000639890 | 20               | 49373597       | 639890      | 648757      | rs769948178  | Neutral    | 0.641    | 0.237        | 0.122    |
| KCNB1 | 661 | M   | V   | NM_004975.4(KCNB1):c.1981A>G (p.Met661Val) | Epileptic encephalopathy, early infantile, 26               | Benign(Last reviewed: Jun 7, 2020)                  | criteria provided, single submitter                  | VCV000953176 | 20               | 49373579       | 953176      | 951123      | rs1392516083 | Neutral    | 0.68     | 0.208        | 0.111    |
| KCNB1 | 666 | P   | L   | NM_004975.4(KCNB1):c.1997C>T (p.Pro666Leu) | not provided Epileptic encephalopathy, early infantile, 26  | Benign/Likely benign(Last reviewed: Oct 1, 2021)    | criteria provided, multiple submitters, no conflicts | VCV000385555 | 20               | 49373563       | 385555      | 379714      | rs201212125  | Neutral    | 0.716    | 0.18         | 0.105    |
| KCNB1 | 670 | R   | Q   | NM_004975.4(KCNB1):c.2009G>A (p.Arg670Gln) | Epileptic encephalopathy, early infantile, 26(not provided) | Likely benign(Last reviewed: Aug 2, 2020)           | criteria provided, multiple submitters, no conflicts | VCV000576599 | 20               | 49373551       | 576599      | 571290      | rs753575587  | Neutral    | 0.661    | 0.225        | 0.115    |
| KCNB1 | 675 | N   | S   | NM_004975.4(KCNB1):c.2024A>G (p.Asn675Ser) | not provided                                                | Uncertain significance(Last reviewed: Jan 1, 2021)  | criteria provided, single submitter                  | VCV001013457 | 20               | 49373536       | 1013457     | 1001170     | rs1186529246 | Neutral    | 0.719    | 0.177        | 0.104    |
| KCNB1 | 677 | M   | V   | NM_004975.4(KCNB1):c.2029A>G (p.Met677Val) | not provided                                                | Uncertain significance(Last reviewed: Jan 11, 2021) | criteria provided, single submitter                  | VCV001302405 | 20               | 49373531       | 1302405     | 1292686     | NA           | Neutral    | 0.677    | 0.211        | 0.112    |
| KCNB1 | 687 | V   | I   | NM_004975.4(KCNB1):c.2059G>A (p.Val687Ile) | Epileptic encephalopathy, early infantile, 26               | Benign(Last reviewed: Nov 23, 2020)                 | criteria provided, single submitter                  | VCV000833949 | 20               | 49373501       | 833949      | 822163      | rs372263564  | Neutral    | 0.712    | 0.183        | 0.105    |

| gene  | pos | aa1 | aa2 | Name                                       | Condition(s)                                               | Clinical significance (Last reviewed)                                     | Review status                                        | Accession    | GRCh38Chromosome | GRCh38Location | VariationID | AlleleID(s) | dbSNP ID     | prediction | prob.LOF | prob.Neutral | prob.GOF |
|-------|-----|-----|-----|--------------------------------------------|------------------------------------------------------------|---------------------------------------------------------------------------|------------------------------------------------------|--------------|------------------|----------------|-------------|-------------|--------------|------------|----------|--------------|----------|
| KCNB1 | 688 | L   | P   | NM_004975.4(KCNB1):c.2063T>C (p.Leu688Pro) | Epileptic encephalopathy, early infantile, 26              | Uncertain significance(Last reviewed: Dec 19, 2018)                       | criteria provided, single submitter                  | VCV000645917 | 20               | 49373497       | 645917      | 648756      | rs1601069788 | Neutral    | 0.725    | 0.176        | 0.099    |
| KCNB1 | 690 | M   | T   | NM_004975.4(KCNB1):c.2069T>C (p.Met690Thr) | not provided                                               | Uncertain significance(Last reviewed: Dec 3, 2019)                        | criteria provided, single submitter                  | VCV001310973 | 20               | 49373491       | 1310973     | 1300354     | NA           | Neutral    | 0.684    | 0.207        | 0.109    |
| KCNB1 | 693 | D   | E   | NM_004975.4(KCNB1):c.2079C>A (p.Asp693Glu) | not provided                                               | Uncertain significance(Last reviewed: Nov 12, 2019)                       | criteria provided, single submitter                  | VCV001310109 | 20               | 49373481       | 1310109     | 1301960     | NA           | Neutral    | 0.695    | 0.199        | 0.106    |
| KCNB1 | 697 | N   | K   | NM_004975.4(KCNB1):c.2091C>G (p.Asn697Lys) | not provided                                               | Uncertain significance(Last reviewed: Sep 7, 2017)                        | criteria provided, single submitter                  | VCV000451846 | 20               | 49373469       | 451846      | 446260      | rs746382408  | Neutral    | 0.634    | 0.242        | 0.124    |
| KCNB1 | 698 | R   | Q   | NM_004975.4(KCNB1):c.2093G>A (p.Arg698Gln) | Epileptic encephalopathy, early infantile, 26 not provided | Conflicting interpretations of pathogenicity(Last reviewed: Oct 11, 2020) | criteria provided, conflicting interpretations       | VCV000938351 | 20               | 49373467       | 938351      | 939000      | rs1449919002 | Neutral    | 0.632    | 0.246        | 0.122    |
| KCNB1 | 698 | R   | W   | NM_004975.4(KCNB1):c.2092C>T (p.Arg698Trp) | Epileptic encephalopathy, early infantile, 26              | Uncertain significance(Last reviewed: Jan 25, 2020)                       | criteria provided, single submitter                  | VCV001007454 | 20               | 49373468       | 1007454     | 999054      | rs779379680  | Neutral    | 0.646    | 0.227        | 0.127    |
| KCNB1 | 700 | S   | N   | NM_004975.4(KCNB1):c.2099G>A (p.Ser700Asn) | Epileptic encephalopathy, early infantile, 26              | Uncertain significance(Last reviewed: Nov 7, 2019)                        | criteria provided, single submitter                  | VCV000961786 | 20               | 49373461       | 961786      | 951122      | rs1984201256 | Neutral    | 0.651    | 0.228        | 0.121    |
| KCNB1 | 702 | A   | E   | NM_004975.4(KCNB1):c.2105C>A (p.Ala702Glu) | Epileptic encephalopathy, early infantile, 26              | Benign(Last reviewed: Mar 23, 2019)                                       | criteria provided, single submitter                  | VCV000576853 | 20               | 49373455       | 576853      | 572927      | rs144379782  | Neutral    | 0.673    | 0.209        | 0.117    |
| KCNB1 | 702 | A   | V   | NM_004975.4(KCNB1):c.2105C>T (p.Ala702Val) | not provided Epileptic encephalopathy, early infantile, 26 | Benign/Likely benign(Last reviewed: Oct 26, 2020)                         | criteria provided, multiple submitters, no conflicts | VCV000762094 | 20               | 49373455       | 762094      | 773152      | rs144379782  | Neutral    | 0.661    | 0.218        | 0.121    |
| KCNB1 | 706 | A   | S   | NM_004975.4(KCNB1):c.2116G>T (p.Ala706Ser) | Epileptic encephalopathy, early infantile, 26              | Likely benign(Last reviewed: Sep 15, 2020)                                | criteria provided, single submitter                  | VCV001098263 | 20               | 49373444       | 1098263     | 1085397     | NA           | Neutral    | 0.677    | 0.211        | 0.112    |
| KCNB1 | 706 | A   | T   | NM_004975.4(KCNB1):c.2116G>A (p.Ala706Thr) | Epileptic encephalopathy, early infantile, 26              | Uncertain significance(Last reviewed: Feb 17, 2018)                       | criteria provided, single submitter                  | VCV000581484 | 20               | 49373444       | 581484      | 575115      | rs779750227  | Neutral    | 0.674    | 0.211        | 0.115    |
| KCNB1 | 712 | T   | M   | NM_004975.4(KCNB1):c.2135C>T (p.Thr712Met) | Epileptic encephalopathy, early infantile, 26              | Uncertain significance(Last reviewed: Aug 6, 2018)                        | criteria provided, single submitter                  | VCV000660973 | 20               | 49373425       | 660973      | 648755      | rs775588653  | Neutral    | 0.679    | 0.202        | 0.119    |
| KCNB1 | 715 | D   | H   | NM_004975.4(KCNB1):c.2143G>C (p.Asp715His) | Epileptic encephalopathy, early infantile, 26 not provided | Uncertain significance(Last reviewed: Jun 9, 2021)                        | criteria provided, multiple submitters, no conflicts | VCV000647767 | 20               | 49373417       | 647767      | 648754      | rs1601069538 | Neutral    | 0.664    | 0.217        | 0.119    |
| KCNB1 | 718 | V   | M   | NM_004975.4(KCNB1):c.2152G>A (p.Val718Met) | Epileptic encephalopathy, early infantile, 26              | Uncertain significance(Last reviewed: Dec 27, 2017)                       | criteria provided, single submitter                  | VCV000542056 | 20               | 49373408       | 542056      | 534143      | rs774976039  | Neutral    | 0.691    | 0.2          | 0.109    |
| KCNB1 | 727 | T   | S   | NM_004975.4(KCNB1):c.2180C>G (p.Thr727Ser) | Epileptic encephalopathy, early infantile, 26              | Uncertain significance(Last reviewed: May 3, 2020)                        | criteria provided, single submitter                  | VCV001004111 | 20               | 49373380       | 1004111     | 999053      | rs778296598  | Neutral    | 0.641    | 0.24         | 0.118    |



| gene  | pos | aa1 | aa2 | Name                                       | Condition(s)                                               | Clinical significance (Last reviewed)                                     | Review status                                  | Accession    | GRCh38Chromosome | GRCh38Location | VariationID | AlleleID(s) | dbSNP ID     | prediction | prob.LOF | prob.Neutral | prob.GOF |
|-------|-----|-----|-----|--------------------------------------------|------------------------------------------------------------|---------------------------------------------------------------------------|------------------------------------------------|--------------|------------------|----------------|-------------|-------------|--------------|------------|----------|--------------|----------|
| KCNB1 | 734 | P   | H   | NM_004975.4(KCNB1):c.2201C>A (p.Pro734His) | Epileptic encephalopathy, early infantile, 26              | Uncertain significance(Last reviewed: Sep 24, 2020)                       | criteria provided, single submitter            | VCV001006665 | 20               | 49373359       | 1006665     | 999052      | rs780940515  | Neutral    | 0.65     | 0.234        | 0.116    |
| KCNB1 | 734 | P   | S   | NM_004975.4(KCNB1):c.2200C>T (p.Pro734Ser) | Epileptic encephalopathy, early infantile, 26              | Uncertain significance(Last reviewed: May 31, 2017)                       | criteria provided, single submitter            | VCV000475261 | 20               | 49373360       | 475261      | 469403      | rs1214997887 | Neutral    | 0.647    | 0.237        | 0.115    |
| KCNB1 | 735 | P   | A   | NM_004975.4(KCNB1):c.2203C>G (p.Pro735Ala) | Epileptic encephalopathy, early infantile, 26              | Uncertain significance(Last reviewed: Apr 1, 2018)                        | criteria provided, single submitter            | VCV000572894 | 20               | 49373357       | 572894      | 571285      | rs267605983  | Neutral    | 0.669    | 0.216        | 0.114    |
| KCNB1 | 735 | P   | L   | NM_004975.4(KCNB1):c.2204C>T (p.Pro735Leu) | Epileptic encephalopathy, early infantile, 26              | Uncertain significance(Last reviewed: Sep 30, 2019)                       | criteria provided, single submitter            | VCV000964616 | 20               | 49373356       | 964616      | 958856      | rs1984193843 | Neutral    | 0.681    | 0.206        | 0.114    |
| KCNB1 | 736 | R   | Q   | NM_004975.4(KCNB1):c.2207G>A (p.Arg736Gln) | not provided                                               | Likely benign(Last reviewed: Nov 15, 2019)                                | criteria provided, single submitter            | VCV001191617 | 20               | 49373353       | 1191617     | 1181869     | NA           | Neutral    | 0.663    | 0.22         | 0.117    |
| KCNB1 | 736 | R   | W   | NM_004975.4(KCNB1):c.2206C>T (p.Arg736Trp) | not provided                                               | Uncertain significance(Last reviewed: Oct 1, 2018)                        | criteria provided, single submitter            | VCV000809256 | 20               | 49373354       | 809256      | 797992      | rs754428005  | Neutral    | 0.675    | 0.206        | 0.119    |
| KCNB1 | 742 | T   | K   | NM_004975.4(KCNB1):c.2225C>A (p.Thr742Lys) | Epileptic encephalopathy, early infantile, 26              | Likely benign(Last reviewed: Jun 7, 2020)                                 | criteria provided, single submitter            | VCV001083688 | 20               | 49373335       | 1083688     | 1085396     | NA           | Neutral    | 0.65     | 0.229        | 0.12     |
| KCNB1 | 745 | A   | V   | NM_004975.4(KCNB1):c.2234C>T (p.Ala745Val) | Epileptic encephalopathy, early infantile, 26              | Uncertain significance(Last reviewed: Feb 24, 2020)                       | criteria provided, single submitter            | VCV000845087 | 20               | 49373326       | 845087      | 848467      | rs1984191107 | Neutral    | 0.722    | 0.171        | 0.107    |
| KCNB1 | 750 | A   | V   | NM_004975.4(KCNB1):c.2249C>T (p.Ala750Val) | not provided Epileptic encephalopathy, early infantile, 26 | Conflicting interpretations of pathogenicity(Last reviewed: Jul 21, 2020) | criteria provided, conflicting interpretations | VCV000848107 | 20               | 49373311       | 848107      | 848466      | rs750157634  | Neutral    | 0.688    | 0.197        | 0.115    |
| KCNB1 | 758 | A   | S   | NM_004975.4(KCNB1):c.2272G>T (p.Ala758Ser) | Epileptic encephalopathy, early infantile, 26              | Uncertain significance(Last reviewed: Oct 23, 2020)                       | criteria provided, single submitter            | VCV000951533 | 20               | 49373288       | 951533      | 929218      | rs774577428  | Neutral    | 0.66     | 0.226        | 0.114    |
| KCNB1 | 758 | A   | T   | NM_004975.4(KCNB1):c.2272G>A (p.Ala758Thr) | Epileptic encephalopathy, early infantile, 26              | Benign(Last reviewed: Oct 26, 2020)                                       | criteria provided, single submitter            | VCV000567109 | 20               | 49373288       | 567109      | 571278      | rs774577428  | Neutral    | 0.656    | 0.228        | 0.116    |
| KCNB1 | 762 | D   | N   | NM_004975.4(KCNB1):c.2284G>A (p.Asp762Asn) | not provided                                               | Uncertain significance(Last reviewed: Oct 1, 2020)                        | criteria provided, single submitter            | VCV001013456 | 20               | 49373276       | 1013456     | 1001169     | rs1277329633 | Neutral    | 0.666    | 0.22         | 0.114    |
| KCNB1 | 771 | D   | V   | NM_004975.4(KCNB1):c.2312A>T (p.Asp771Val) | not provided                                               | Uncertain significance(Last reviewed: May 23, 2018)                       | criteria provided, single submitter            | VCV000546484 | 20               | 49373248       | 546484      | 537003      | rs1304300872 | Neutral    | 0.637    | 0.241        | 0.122    |
| KCNB1 | 772 | S   | Y   | NM_004975.4(KCNB1):c.2315C>A (p.Ser772Tyr) | Epileptic encephalopathy, early infantile, 26              | Uncertain significance(Last reviewed: Nov 3, 2021)                        | criteria provided, single submitter            | VCV001319065 | 20               | 49373245       | 1319065     | 1309318     | NA           | Neutral    | 0.645    | 0.229        | 0.126    |
| KCNB1 | 774 | P   | T   | NM_004975.4(KCNB1):c.2320C>A (p.Pro774Thr) | Epileptic encephalopathy, early infantile, 26 not provided | Benign(Last reviewed: Nov 21, 2020)                                       | criteria provided, single submitter            | VCV000568166 | 20               | 49373240       | 568166      | 573568      | rs748597382  | Neutral    | 0.644    | 0.245        | 0.111    |
| KCNB1 | 775 | P   | A   | NM_004975.4(KCNB1):c.2323C>G (p.Pro775Ala) | Epileptic encephalopathy, early infantile, 26              | Benign(Last reviewed: Oct 1, 2020)                                        | criteria provided, single submitter            | VCV000947951 | 20               | 49373237       | 947951      | 929217      | rs142461221  | Neutral    | 0.652    | 0.24         | 0.108    |

| gene  | pos | aa1 | aa2 | Name                                       | Condition(s)                                                | Clinical significance (Last reviewed)                                     | Review status                                        | Accession    | GRCh38Chromosome | GRCh38Location | VariationID | AlleleID(s) | dbSNP ID     | prediction | prob.LOF | prob.Neutral | prob.GOF |
|-------|-----|-----|-----|--------------------------------------------|-------------------------------------------------------------|---------------------------------------------------------------------------|------------------------------------------------------|--------------|------------------|----------------|-------------|-------------|--------------|------------|----------|--------------|----------|
| KCNB1 | 775 | P   | H   | NM_004975.4(KCNB1):c.2324C>A (p.Pro775His) | Epileptic encephalopathy, early infantile, 26[not provided] | Uncertain significance(Last reviewed: Jun 26, 2018)                       | criteria provided, multiple submitters, no conflicts | VCV000430040 | 20               | 49373236       | 430040      | 422322      | rs530927636  | Neutral    | 0.65     | 0.237        | 0.113    |
| KCNB1 | 775 | P   | R   | NM_004975.4(KCNB1):c.2324C>G (p.Pro775Arg) | Epileptic encephalopathy, early infantile, 26[not provided] | Conflicting interpretations of pathogenicity(Last reviewed: Oct 8, 2020)  | criteria provided, conflicting interpretations       | VCV000425270 | 20               | 49373236       | 425270      | 413604      | rs530927636  | Neutral    | 0.666    | 0.221        | 0.113    |
| KCNB1 | 776 | K   | R   | NM_004975.4(KCNB1):c.2327A>G (p.Lys776Arg) | Epileptic encephalopathy, early infantile, 26[not provided] | Conflicting interpretations of pathogenicity(Last reviewed: Oct 21, 2020) | criteria provided, conflicting interpretations       | VCV000578493 | 20               | 49373233       | 578493      | 571276      | rs756982426  | Neutral    | 0.663    | 0.22         | 0.117    |
| KCNB1 | 777 | S   | G   | NM_004975.4(KCNB1):c.2329A>G (p.Ser777Gly) | Epileptic encephalopathy, early infantile, 26               | Uncertain significance(Last reviewed: Oct 26, 2020)                       | criteria provided, single submitter                  | VCV001009790 | 20               | 49373231       | 1009790     | 999051      | rs1984182896 | Neutral    | 0.659    | 0.227        | 0.114    |
| KCNB1 | 781 | S   | N   | NM_004975.4(KCNB1):c.2342G>A (p.Ser781Asn) | not provided                                                | Likely benign(Last reviewed: Apr 1, 2020)                                 | criteria provided, single submitter                  | VCV000932380 | 20               | 49373218       | 932380      | 920971      | rs1271782193 | Neutral    | 0.639    | 0.234        | 0.127    |
| KCNB1 | 782 | T   | I   | NM_004975.4(KCNB1):c.2345C>T (p.Thr782Ile) | Epileptic encephalopathy, early infantile, 26               | Uncertain significance(Last reviewed: Jul 9, 2020)                        | criteria provided, single submitter                  | VCV001022623 | 20               | 49373215       | 1022623     | 1014170     | rs751639377  | Neutral    | 0.649    | 0.232        | 0.119    |
| KCNB1 | 782 | T   | S   | NM_004975.4(KCNB1):c.2345C>G (p.Thr782Ser) | Epileptic encephalopathy, early infantile, 26               | Uncertain significance(Last reviewed: Oct 21, 2020)                       | criteria provided, single submitter                  | VCV001002068 | 20               | 49373215       | 1002068     | 999050      | rs751639377  | Neutral    | 0.636    | 0.245        | 0.119    |
| KCNB1 | 784 | P   | L   | NM_004975.4(KCNB1):c.2351C>T (p.Pro784Leu) | Epileptic encephalopathy, early infantile, 26               | Uncertain significance(Last reviewed: May 2, 2018)                        | criteria provided, single submitter                  | VCV000576386 | 20               | 49373209       | 576386      | 575114      | rs766596568  | Neutral    | 0.663    | 0.229        | 0.108    |
| KCNB1 | 788 | T   | K   | NM_004975.4(KCNB1):c.2363C>A (p.Thr788Lys) | Epileptic encephalopathy, early infantile, 26[not provided] | Benign(Last reviewed: Aug 30, 2020)                                       | criteria provided, multiple submitters, no conflicts | VCV000542062 | 20               | 49373197       | 542062      | 533646      | rs140932985  | Neutral    | 0.656    | 0.227        | 0.118    |
| KCNB1 | 788 | T   | M   | NM_004975.4(KCNB1):c.2363C>T (p.Thr788Met) | Epileptic encephalopathy, early infantile, 26               | Benign(Last reviewed: Dec 17, 2019)                                       | criteria provided, single submitter                  | VCV000833692 | 20               | 49373197       | 833692      | 822162      | rs140932985  | Neutral    | 0.646    | 0.237        | 0.117    |
| KCNB1 | 792 | S   | L   | NM_004975.4(KCNB1):c.2375C>T (p.Ser792Leu) | not provided                                                | Likely benign(Last reviewed: Dec 18, 2020)                                | criteria provided, single submitter                  | VCV001198556 | 20               | 49373185       | 1198556     | 1188869     | NA           | Neutral    | 0.652    | 0.23         | 0.118    |
| KCNB1 | 798 | E   | Q   | NM_004975.4(KCNB1):c.2392G>C (p.Glu798Gln) | Epileptic encephalopathy, early infantile, 26[not provided] | Uncertain significance(Last reviewed: Jun 26, 2018)                       | criteria provided, multiple submitters, no conflicts | VCV000430043 | 20               | 49373168       | 430043      | 422321      | rs1131691752 | Neutral    | 0.655    | 0.224        | 0.121    |
| KCNB1 | 804 | T   | A   | NM_004975.4(KCNB1):c.2410A>G (p.Thr804Ala) | Epileptic encephalopathy, early infantile, 26               | Uncertain significance(Last reviewed: Aug 17, 2019)                       | criteria provided, single submitter                  | VCV000957516 | 20               | 49373150       | 957516      | 951121      | rs1262864745 | Neutral    | 0.649    | 0.234        | 0.117    |
| KCNB1 | 804 | T   | I   | NM_004975.4(KCNB1):c.2411C>T (p.Thr804Ile) | not specified                                               | Uncertain significance(Last reviewed: Nov 30, 2016)                       | criteria provided, single submitter                  | VCV000373635 | 20               | 49373149       | 373635      | 360467      | rs1049874069 | Neutral    | 0.657    | 0.224        | 0.119    |
| KCNB1 | 806 | P   | L   | NM_004975.4(KCNB1):c.2417C>T (p.Pro806Leu) | Epileptic encephalopathy, early infantile, 26               | Benign(Last reviewed: Nov 5, 2019)                                        | criteria provided, single submitter                  | VCV000833869 | 20               | 49373143       | 833869      | 822161      | rs1249019020 | Neutral    | 0.706    | 0.195        | 0.1      |
| KCNB1 | 806 | P   | S   | NM_004975.4(KCNB1):c.2416C>T               | Epileptic encephalopathy, early infantile, 26               | Uncertain                                                                 | criteria                                             | VCV000940834 | 20               | 49373144       | 940834      | 938999      | rs1471856482 | Neutral    | 0.704    | 0.2          | 0.097    |

| gene  | pos | aa1 | aa2 | Name                                                 | Condition(s)                                                             | Clinical significance (Last reviewed)               | Review status                                        | Accession    | GRCh38Chromosome | GRCh38Location      | VariationID | AlleleID(s) | dbSNP ID     | prediction | prob.LOF | prob.Neutral | prob.GOF |
|-------|-----|-----|-----|------------------------------------------------------|--------------------------------------------------------------------------|-----------------------------------------------------|------------------------------------------------------|--------------|------------------|---------------------|-------------|-------------|--------------|------------|----------|--------------|----------|
|       |     |     |     | (p.Pro806Ser)                                        |                                                                          | significance(Last reviewed: Sep 18, 2019)           | provided, single submitter                           |              |                  |                     |             |             |              |            |          |              |          |
| KCNB1 | 814 | I   | M   | NM_004975.4(KCNB1):c.2442T>G (p.Ile814Met)           | Seizures Epileptic encephalopathy, early infantile, 26 not provided      | Benign(Last reviewed: Nov 10, 2020)                 | criteria provided, multiple submitters, no conflicts | VCV000392430 | 20               | 49373118            | 392430      | 378077      | rs565025643  | Neutral    | 0.739    | 0.168        | 0.093    |
| KCNB1 | 819 | A   | T   | NM_004975.4(KCNB1):c.2455G>A (p.Ala819Thr)           | Epileptic encephalopathy, early infantile, 26                            | Benign(Last reviewed: Oct 30, 2019)                 | criteria provided, single submitter                  | VCV000833994 | 20               | 49373105            | 833994      | 822160      | rs373423740  | Neutral    | 0.65     | 0.229        | 0.121    |
| KCNB1 | 819 | A   | V   | NM_004975.4(KCNB1):c.2456C>T (p.Ala819Val)           | Epileptic encephalopathy, early infantile, 26 not provided               | Likely benign(Last reviewed: Aug 25, 2018)          | criteria provided, single submitter                  | VCV000740544 | 20               | 49373104            | 740544      | 757587      | rs777645076  | Neutral    | 0.66     | 0.222        | 0.118    |
| KCNB1 | 820 | L   | F   | NM_004975.4(KCNB1):c.2460G>T (p.Leu820Phe)           | Epileptic encephalopathy, early infantile, 26                            | Uncertain significance(Last reviewed: Feb 21, 2020) | criteria provided, single submitter                  | VCV001006183 | 20               | 49373100            | 1006183     | 999049      | rs1984174923 | Neutral    | 0.692    | 0.199        | 0.109    |
| KCNB1 | 824 | G   | D   | NM_004975.4(KCNB1):c.2471G>A (p.Gly824Asp)           | Epileptic encephalopathy, early infantile, 26                            | Benign(Last reviewed: Dec 23, 2019)                 | criteria provided, single submitter                  | VCV000833699 | 20               | 49373089            | 833699      | 822159      | rs780469478  | Neutral    | 0.678    | 0.206        | 0.115    |
| KCNB1 | 825 | P   | S   | NM_004975.4(KCNB1):c.2473C>T (p.Pro825Ser)           | Epileptic encephalopathy, early infantile, 26 not provided not specified | Benign(Last reviewed: Dec 8, 2020)                  | criteria provided, multiple submitters, no conflicts | VCV000382142 | 20               | 49373087            | 382142      | 378277      | rs34467662   | Neutral    | 0.654    | 0.227        | 0.119    |
| KCNB1 | 825 | P   | S   | NM_004975.4(KCNB1):c.2473C>T (p.Pro825Ser)           | Epileptic encephalopathy, early infantile, 26 not provided not specified | Benign(Last reviewed: Dec 8, 2020)                  | criteria provided, multiple submitters, no conflicts | VCV000382142 | 20               | 49373087            | 382142      | 378277      | rs34467662   | Neutral    | 0.654    | 0.227        | 0.119    |
| KCNB1 | 825 | P   | S   | NM_004975.4(KCNB1):c.2472_2473delinsTT (p.Pro825Ser) | Epileptic encephalopathy, early infantile, 26                            | Uncertain significance(Last reviewed: Jul 10, 2020) | criteria provided, single submitter                  | VCV001062047 | 20               | 49373087 - 49373088 | 1062047     | 1051734     | NA           | Neutral    | 0.654    | 0.227        | 0.119    |
| KCNB1 | 825 | P   | S   | NM_004975.4(KCNB1):c.2472_2473delinsTT (p.Pro825Ser) | Epileptic encephalopathy, early infantile, 26                            | Uncertain significance(Last reviewed: Jul 10, 2020) | criteria provided, single submitter                  | VCV001062047 | 20               | 49373087 - 49373088 | 1062047     | 1051734     | NA           | Neutral    | 0.654    | 0.227        | 0.119    |
| KCNB1 | 838 | S   | P   | NM_004975.4(KCNB1):c.2512T>C (p.Ser838Pro)           | Epileptic encephalopathy, early infantile, 26                            | Uncertain significance(Last reviewed: Jan 11, 2020) | criteria provided, single submitter                  | VCV001020008 | 20               | 49373048            | 1020008     | 1014169     | rs1984172893 | Neutral    | 0.716    | 0.18         | 0.104    |
| KCNB1 | 839 | P   | L   | NM_004975.4(KCNB1):c.2516C>T (p.Pro839Leu)           | Epileptic encephalopathy, early infantile, 26 not specified              | Likely benign(Last reviewed: Jan 11, 2018)          | criteria provided, multiple submitters, no conflicts | VCV000475262 | 20               | 49373044            | 475262      | 471425      | rs761070687  | Neutral    | 0.722    | 0.182        | 0.096    |
| KCNB1 | 839 | P   | T   | NM_004975.4(KCNB1):c.2515C>A (p.Pro839Thr)           | Epileptic encephalopathy, early infantile, 26                            | Uncertain significance(Last reviewed: Sep 18, 2020) | criteria provided, single submitter                  | VCV001045643 | 20               | 49373045            | 1045643     | 1034742     | rs1984172647 | Neutral    | 0.718    | 0.187        | 0.095    |
| KCNB1 | 841 | V   | I   | NM_004975.4(KCNB1):c.2521G>A (p.Val841Ile)           | Epileptic encephalopathy, early infantile, 26                            | Benign(Last reviewed: Oct 15, 2020)                 | criteria provided, single submitter                  | VCV001170471 | 20               | 49373039            | 1170471     | 1158892     | NA           | Neutral    | 0.736    | 0.169        | 0.094    |
| KCNB1 | 842 | R   | C   | NM_004975.4(KCNB1):c.2524C>T (p.Arg842Cys)           | Epileptic encephalopathy, early infantile, 26                            | Uncertain significance(Last reviewed: Oct 9, 2020)  | criteria provided, single submitter                  | VCV000998443 | 20               | 49373036            | 998443      | 999048      | rs758964585  | Neutral    | 0.68     | 0.21         | 0.11     |
| KCNB1 | 842 | R   | H   | NM_004975.4(KCNB1):c.2525G>A (p.Arg842His)           | Epileptic encephalopathy, early infantile, 26                            | Benign(Last reviewed: Oct 5,                        | criteria provided, single                            | VCV001166389 | 20               | 49373035            | 1166389     | 1158891     | NA           | Neutral    | 0.647    | 0.242        | 0.111    |

| gene  | pos | aa1 | aa2 | Name                                        | Condition(s)                                                             | Clinical significance (Last reviewed)               | Review status                                        | Accession    | GRCh38Chromosome | GRCh38Location | VariationID | AlleleID(s) | dbSNP ID     | prediction | prob.LOF | prob.Neutral | prob.GOF |
|-------|-----|-----|-----|---------------------------------------------|--------------------------------------------------------------------------|-----------------------------------------------------|------------------------------------------------------|--------------|------------------|----------------|-------------|-------------|--------------|------------|----------|--------------|----------|
|       |     |     |     |                                             |                                                                          | 2020)                                               | submitter                                            |              |                  |                |             |             |              |            |          |              |          |
| KCNB1 | 846 | G   | V   | NM_004975.4(KCNB1):c.2537G>T (p.Gly846Val)  | Epileptic encephalopathy, early infantile, 26                            | Uncertain significance(Last reviewed: Sep 17, 2019) | criteria provided, single submitter                  | VCV000958081 | 20               | 49373023       | 958081      | 951120      | rs1386449842 | Neutral    | 0.692    | 0.199        | 0.108    |
| KCNB1 | 853 | T   | I   | NM_004975.4(KCNB1):c.2558C>T (p.Thr853Ile)  | not provided                                                             | Uncertain significance(Last reviewed: Jan 1, 2020)  | criteria provided, single submitter                  | VCV000872730 | 20               | 49373002       | 872730      | 860648      | rs1001982708 | Neutral    | 0.699    | 0.194        | 0.107    |
| KCNB1 | 857 | S   | N   | NM_004975.4(KCNB1):c.2570G>A (p.Ser857Asn)  | not provided not specified Epileptic encephalopathy, early infantile, 26 | Benign(Last reviewed: Dec 6, 2020)                  | criteria provided, multiple submitters, no conflicts | VCV000380824 | 20               | 49372990       | 380824      | 378076      | rs34280195   | Neutral    | 0.68     | 0.211        | 0.109    |
| KCNC1 | 4   | G   | E   | NM_001112741.2(KCNC1):c.11G>A (p.Gly4Glu)   | Epilepsy, progressive myoclonic 7                                        | Uncertain significance(Last reviewed: Jun 22, 2019) | criteria provided, single submitter                  | VCV000931566 | 11               | 17736013       | 931566      | 919344      | rs1848761561 | Neutral    | 0.662    | 0.172        | 0.166    |
| KCNC1 | 23  | R   | H   | NM_001112741.2(KCNC1):c.68G>A (p.Arg23His)  | Epilepsy, progressive myoclonic 7                                        | Uncertain significance(Last reviewed: Aug 25, 2019) | criteria provided, single submitter                  | VCV000938579 | 11               | 17736070       | 938579      | 935449      | rs1158193192 | LOF        | 0.799    | 0.066        | 0.135    |
| KCNC1 | 31  | G   | R   | NM_001112741.2(KCNC1):c.91G>C (p.Gly31Arg)  | not provided                                                             | Uncertain significance(Last reviewed: Sep 28, 2019) | criteria provided, single submitter                  | VCV001308752 | 11               | 17736093       | 1308752     | 1300780     | NA           | LOF        | 0.773    | 0.097        | 0.13     |
| KCNC1 | 41  | D   | N   | NM_001112741.2(KCNC1):c.121G>A (p.Asp41Asn) | Epilepsy, progressive myoclonic 7                                        | Uncertain significance(Last reviewed: Apr 10, 2018) | criteria provided, single submitter                  | VCV000567485 | 11               | 17736123       | 567485      | 564515      | rs1192156090 | Neutral    | 0.693    | 0.145        | 0.162    |
| KCNC1 | 44  | S   | N   | NM_001112741.2(KCNC1):c.131G>A (p.Ser44Asn) | Epilepsy, progressive myoclonic 7                                        | Uncertain significance(Last reviewed: Aug 30, 2018) | criteria provided, single submitter                  | VCV000653011 | 11               | 17736133       | 653011      | 639846      | rs773455390  | LOF        | 0.79     | 0.119        | 0.091    |
| KCNC1 | 45  | H   | Y   | NM_001112741.2(KCNC1):c.133C>T (p.His45Tyr) | Epilepsy, progressive myoclonic 7                                        | Uncertain significance(Last reviewed: Feb 21, 2020) | criteria provided, single submitter                  | VCV000864788 | 11               | 17736135       | 864788      | 838159      | rs1470613305 | Neutral    | 0.684    | 0.146        | 0.17     |
| KCNC1 | 46  | F   | L   | NM_001112741.2(KCNC1):c.138C>G (p.Phe46Leu) | not specified Epilepsy, progressive myoclonic 7                          | Uncertain significance(Last reviewed: Oct 25, 2019) | criteria provided, multiple submitters, no conflicts | VCV000928891 | 11               | 17736140       | 928891      | 917083      | rs1848763448 | LOF        | 0.748    | 0.134        | 0.119    |
| KCNC1 | 50  | P   | S   | NM_001112741.2(KCNC1):c.148C>T (p.Pro50Ser) | Epilepsy, progressive myoclonic 7                                        | Uncertain significance(Last reviewed: Feb 21, 2020) | criteria provided, single submitter                  | VCV001036073 | 11               | 17736150       | 1036073     | 1030143     | rs763076681  | LOF        | 0.72     | 0.138        | 0.142    |
| KCNC1 | 59  | R   | H   | NM_001112741.2(KCNC1):c.176G>A (p.Arg59His) | not provided                                                             | Uncertain significance(Last reviewed: Mar 19, 2019) | criteria provided, single submitter                  | VCV001302178 | 11               | 17736178       | 1302178     | 1292460     | NA           | LOF        | 0.781    | 0.114        | 0.105    |
| KCNC1 | 72  | R   | L   | NM_001112741.2(KCNC1):c.215G>T (p.Arg72Leu) | Epilepsy, progressive myoclonic 7                                        | Uncertain significance(Last reviewed: Feb 13, 2020) | criteria provided, single submitter                  | VCV001031095 | 11               | 17736217       | 1031095     | 1017430     | rs1848764021 | LOF        | 0.831    | 0.055        | 0.114    |
| KCNC1 | 75  | K   | E   | NM_001112741.2(KCNC1):c.223A>G (p.Lys75Glu) | Epilepsy, progressive myoclonic 7                                        | Uncertain significance(Last reviewed: Apr 23, 2018) | criteria provided, single submitter                  | VCV000582490 | 11               | 17736225       | 582490      | 565569      | rs1565152713 | LOF        | 0.775    | 0.121        | 0.104    |
| KCNC1 | 94  | W   | C   | NM_001112741.2(KCNC1):c.282G>T (p.Trp94Cys) | Epilepsy, progressive myoclonic 7                                        | Uncertain significance(Last                         | criteria provided, single                            | VCV000982618 | 11               | 17736284       | 982618      | 970931      | rs1848764853 | LOF        | 0.845    | 0.074        | 0.082    |

| gene  | pos | aa1 | aa2 | Name                                         | Condition(s)                      | Clinical significance (Last reviewed)               | Review status                       | Accession    | GRCh38Chromosome | GRCh38Location | VariationID | AlleleID(s) | dbSNP ID     | prediction | prob.LOF | prob.Neutral | prob.GOF |
|-------|-----|-----|-----|----------------------------------------------|-----------------------------------|-----------------------------------------------------|-------------------------------------|--------------|------------------|----------------|-------------|-------------|--------------|------------|----------|--------------|----------|
|       |     |     |     |                                              |                                   | reviewed: Jan 1, 2019)                              | submitter                           |              |                  |                |             |             |              |            |          |              |          |
| KCNC1 | 131 | A   | D   | NM_001112741.2(KCNC1):c.392C>A (p.Ala131Asp) | Epilepsy, progressive myoclonic 7 | Uncertain significance(Last reviewed: Sep 24, 2020) | criteria provided, single submitter | VCV001024248 | 11               | 17736394       | 1024248     | 1009600     | rs1848765901 | Neutral    | 0.66     | 0.188        | 0.152    |
| KCNC1 | 132 | D   | N   | NM_001112741.2(KCNC1):c.394G>A (p.Asp132Asn) | Epilepsy, progressive myoclonic 7 | Uncertain significance(Last reviewed: Jan 16, 2018) | criteria provided, single submitter | VCV000570244 | 11               | 17736396       | 570244      | 567099      | rs770445113  | Neutral    | 0.558    | 0.215        | 0.228    |
| KCNC1 | 137 | D   | N   | NM_001112741.2(KCNC1):c.409G>A (p.Asp137Asn) | Epilepsy, progressive myoclonic 7 | Uncertain significance(Last reviewed: May 12, 2019) | criteria provided, single submitter | VCV000847604 | 11               | 17736411       | 847604      | 838160      | rs1848766389 | Neutral    | 0.617    | 0.208        | 0.175    |
| KCNC1 | 141 | D   | Y   | NM_001112741.2(KCNC1):c.421G>T (p.Asp141Tyr) | Epilepsy, progressive myoclonic 7 | Uncertain significance(Last reviewed: Mar 10, 2020) | criteria provided, single submitter | VCV000661955 | 11               | 17736423       | 661955      | 639847      | rs376363769  | Neutral    | 0.627    | 0.203        | 0.17     |
| KCNC1 | 143 | G   | D   | NM_001112741.2(KCNC1):c.428G>A (p.Gly143Asp) | Epilepsy, progressive myoclonic 7 | Uncertain significance(Last reviewed: Jun 30, 2020) | criteria provided, single submitter | VCV001014282 | 11               | 17736430       | 1014282     | 1009601     | rs1848766892 | Neutral    | 0.626    | 0.205        | 0.169    |
| KCNC1 | 145 | G   | R   | NM_001112741.2(KCNC1):c.433G>C (p.Gly145Arg) | Epilepsy, progressive myoclonic 7 | Uncertain significance(Last reviewed: Jul 26, 2017) | criteria provided, single submitter | VCV000475354 | 11               | 17736435       | 475354      | 461316      | rs759773311  | Neutral    | 0.639    | 0.191        | 0.17     |
| KCNC1 | 147 | D   | E   | NM_001112741.2(KCNC1):c.441C>G (p.Asp147Glu) | Epilepsy, progressive myoclonic 7 | Uncertain significance(Last reviewed: Feb 10, 2020) | criteria provided, single submitter | VCV000852716 | 11               | 17736443       | 852716      | 838161      | rs1279299321 | Neutral    | 0.608    | 0.196        | 0.197    |
| KCNC1 | 148 | E   | K   | NM_001112741.2(KCNC1):c.442G>A (p.Glu148Lys) | not provided                      | Uncertain significance(Last reviewed: Nov 21, 2019) | criteria provided, single submitter | VCV001310491 | 11               | 17736444       | 1310491     | 1301195     | NA           | Neutral    | 0.663    | 0.188        | 0.149    |
| KCNC1 | 162 | D   | E   | NM_001112741.2(KCNC1):c.486T>A (p.Asp162Glu) | Epilepsy, progressive myoclonic 7 | Uncertain significance(Last reviewed: Dec 18, 2019) | criteria provided, single submitter | VCV000930835 | 11               | 17736488       | 930835      | 919345      | rs1436435735 | Neutral    | 0.678    | 0.178        | 0.144    |
| KCNC1 | 164 | R   | W   | NM_001112741.2(KCNC1):c.490C>T (p.Arg164Trp) | Epilepsy, progressive myoclonic 7 | Likely pathogenic(Last reviewed: Oct 2, 2021)       | criteria provided, single submitter | VCV001320194 | 11               | 17736492       | 1320194     | 1310439     | NA           | Neutral    | 0.663    | 0.181        | 0.156    |
| KCNC1 | 165 | P   | L   | NM_001112741.2(KCNC1):c.494C>T (p.Pro165Leu) | Epilepsy, progressive myoclonic 7 | Uncertain significance(Last reviewed: Dec 3, 2018)  | criteria provided, single submitter | VCV000475356 | 11               | 17736496       | 475356      | 460935      | rs749790557  | Neutral    | 0.643    | 0.195        | 0.162    |
| KCNC1 | 166 | G   | D   | NM_001112741.2(KCNC1):c.497G>A (p.Gly166Asp) | Epilepsy, progressive myoclonic 7 | Uncertain significance(Last reviewed: Apr 25, 2019) | criteria provided, single submitter | VCV000843064 | 11               | 17736499       | 843064      | 838162      | rs1848768219 | LOF        | 0.69     | 0.137        | 0.173    |
| KCNC1 | 167 | G   | C   | NM_001112741.2(KCNC1):c.499G>T (p.Gly167Cys) | Epilepsy, progressive myoclonic 7 | Uncertain significance(Last reviewed: Feb 12, 2020) | criteria provided, single submitter | VCV000567985 | 11               | 17736501       | 567985      | 567101      | rs1274575581 | LOF        | 0.733    | 0.122        | 0.145    |
| KCNC1 | 167 | G   | D   | NM_001112741.2(KCNC1):c.500G>A (p.Gly167Asp) | Epilepsy, progressive myoclonic 7 | Uncertain significance(Last reviewed: Aug 11, 2020) | criteria provided, single submitter | VCV001055648 | 11               | 17736502       | 1055648     | 1047130     | NA           | LOF        | 0.736    | 0.109        | 0.155    |
| KCNC1 | 171 | R   | C   | NM_001112741.2(KCNC1):c.511C>T (p.Arg171Cys) | Epilepsy, progressive myoclonic 7 | Uncertain significance(Last reviewed: Apr 22,       | criteria provided, single submitter | VCV001020341 | 11               | 17736513       | 1020341     | 1009602     | rs1286632713 | LOF        | 0.754    | 0.117        | 0.129    |

| gene  | pos | aa1 | aa2 | Name                                         | Condition(s)                                             | Clinical significance (Last reviewed)               | Review status                                        | Accession    | GRCh38Chromosome | GRCh38Location | VariationID | AlleleID(s) | dbSNP ID     | prediction | prob.LOF | prob.Neutral | prob.GOF |
|-------|-----|-----|-----|----------------------------------------------|----------------------------------------------------------|-----------------------------------------------------|------------------------------------------------------|--------------|------------------|----------------|-------------|-------------|--------------|------------|----------|--------------|----------|
|       |     |     |     |                                              |                                                          | 2020)                                               |                                                      |              |                  |                |             |             |              |            |          |              |          |
| KCNC1 | 175 | R   | C   | NM_001112741.2(KCNC1):c.523C>T (p.Arg175Cys) | Epilepsy, progressive myoclonic 7                        | Uncertain significance(Last reviewed: Mar 6, 2020)  | criteria provided, single submitter                  | VCV000650855 | 11               | 17736525       | 650855      | 639848      | rs1197911307 | LOF        | 0.799    | 0.077        | 0.124    |
| KCNC1 | 183 | P   | R   | NM_001112741.2(KCNC1):c.548C>G (p.Pro183Arg) | Epilepsy, progressive myoclonic 7                        | Uncertain significance(Last reviewed: Oct 27, 2020) | criteria provided, multiple submitters, no conflicts | VCV000849585 | 11               | 17736550       | 849585      | 838163      | rs1848768884 | LOF        | 0.818    | 0.068        | 0.114    |
| KCNC1 | 185 | S   | L   | NM_001112741.2(KCNC1):c.554C>T (p.Ser185Leu) | Epilepsy, progressive myoclonic 7                        | Uncertain significance(Last reviewed: Apr 18, 2019) | criteria provided, single submitter                  | VCV000575538 | 11               | 17736556       | 575538      | 565572      | rs1565152898 | LOF        | 0.836    | 0.055        | 0.109    |
| KCNC1 | 188 | Y   | C   | NM_001112741.2(KCNC1):c.563A>G (p.Tyr188Cys) | Seizures                                                 | Uncertain significance(Last reviewed: Sep 16, 2016) | criteria provided, single submitter                  | VCV000588275 | 11               | 17736565       | 588275      | 579707      | rs1027286161 | LOF        | 0.817    | 0.085        | 0.098    |
| KCNC1 | 204 | I   | T   | NM_001112741.2(KCNC1):c.611T>C (p.Ile204Thr) | Epilepsy, progressive myoclonic 7                        | Uncertain significance(Last reviewed: Jan 30, 2018) | criteria provided, single submitter                  | VCV000542107 | 11               | 17771705       | 542107      | 526059      | rs1554991304 | LOF        | 0.881    | 0.049        | 0.07     |
| KCNC1 | 208 | C   | Y   | NM_001112741.2(KCNC1):c.623G>A (p.Cys208Tyr) | not provided                                             | Likely pathogenic(Last reviewed: Oct 23, 2020)      | criteria provided, single submitter                  | VCV000987044 | 11               | 17771717       | 987044      | 975309      | rs1849231544 | LOF        | 0.858    | 0.044        | 0.098    |
| KCNC1 | 226 | N   | I   | NM_001112741.2(KCNC1):c.677A>T (p.Asn226Ile) | not provided Epilepsy, progressive myoclonic 7  Seizures | Likely benign(Last reviewed: Sep 16, 2020)          | criteria provided, multiple submitters, no conflicts | VCV000578014 | 11               | 17771771       | 578014      | 567113      | rs73424032   | LOF        | 0.793    | 0.118        | 0.089    |
| KCNC1 | 227 | V   | I   | NM_001112741.2(KCNC1):c.679G>A (p.Val227Ile) | Epilepsy, progressive myoclonic 7                        | Uncertain significance(Last reviewed: Jan 31, 2019) | criteria provided, single submitter                  | VCV000844665 | 11               | 17771773       | 844665      | 838164      | rs1590106427 | LOF        | 0.747    | 0.136        | 0.117    |
| KCNC1 | 228 | R   | H   | NM_001112741.2(KCNC1):c.683G>A (p.Arg228His) | Epilepsy, progressive myoclonic 7                        | Uncertain significance(Last reviewed: Oct 10, 2019) | criteria provided, single submitter                  | VCV000845316 | 11               | 17771777       | 845316      | 838165      | rs200873319  | LOF        | 0.732    | 0.148        | 0.119    |
| KCNC1 | 228 | R   | L   | NM_001112741.2(KCNC1):c.683G>T (p.Arg228Leu) | Epilepsy, progressive myoclonic 7 not provided           | Benign/Likely benign(Last reviewed: Nov 19, 2020)   | criteria provided, multiple submitters, no conflicts | VCV000475358 | 11               | 17771777       | 475358      | 460938      | rs200873319  | LOF        | 0.739    | 0.143        | 0.118    |
| KCNC1 | 231 | T   | A   | NM_001112741.2(KCNC1):c.691A>G (p.Thr231Ala) | Epilepsy, progressive myoclonic 7                        | Likely pathogenic(Last reviewed: Mar 29, 2018)      | criteria provided, single submitter                  | VCV000568146 | 11               | 17771785       | 568146      | 570411      | rs1565162623 | LOF        | 0.791    | 0.078        | 0.131    |
| KCNC1 | 231 | T   | M   | NM_001112741.2(KCNC1):c.692C>T (p.Thr231Met) | Epilepsy, progressive myoclonic 7                        | Uncertain significance(Last reviewed: Dec 28, 2017) | criteria provided, single submitter                  | VCV000542103 | 11               | 17771786       | 542103      | 526150      | rs1554991314 | LOF        | 0.788    | 0.077        | 0.135    |
| KCNC1 | 232 | Q   | H   | NM_001112741.2(KCNC1):c.696A>C (p.Gln232His) | Epilepsy, progressive myoclonic 7                        | Uncertain significance(Last reviewed: Oct 19, 2017) | criteria provided, single submitter                  | VCV000475359 | 11               | 17771790       | 475359      | 460939      | rs775885483  | LOF        | 0.795    | 0.118        | 0.087    |
| KCNC1 | 234 | R   | H   | NM_001112741.2(KCNC1):c.701G>A (p.Arg234His) | Epilepsy, progressive myoclonic 7                        | Uncertain significance(Last reviewed: Mar 15, 2018) | criteria provided, single submitter                  | VCV000542109 | 11               | 17771795       | 542109      | 526508      | rs763794003  | LOF        | 0.794    | 0.118        | 0.088    |
| KCNC1 | 236 | Y   | H   | NM_001112741.2(KCNC1):c.706T>C               | Epilepsy, progressive myoclonic 7                        | Uncertain                                           | criteria                                             | VCV001051707 | 11               | 17771800       | 1051707     | 1047131     | NA           | LOF        | 0.765    | 0.118        | 0.118    |

| gene  | pos | aa1 | aa2 | Name                                          | Condition(s)                      | Clinical significance (Last reviewed)               | Review status                                        | Accession    | GRCh38Chromosome | GRCh38Location | VariationID | AlleleID(s) | dbSNP ID     | prediction | prob.LOF | prob.Neutral | prob.GOF |
|-------|-----|-----|-----|-----------------------------------------------|-----------------------------------|-----------------------------------------------------|------------------------------------------------------|--------------|------------------|----------------|-------------|-------------|--------------|------------|----------|--------------|----------|
|       |     |     |     | (p.Tyr236His)                                 |                                   | significance(Last reviewed: Feb 27, 2020)           | provided, single submitter                           |              |                  |                |             |             |              |            |          |              |          |
| KCNC1 | 237 | R   | Q   | NM_001112741.2(KCNC1):c.710G>A (p.Arg237Gln)  | Epilepsy, progressive myoclonic 7 | Uncertain significance(Last reviewed: Mar 10, 2020) | criteria provided, single submitter                  | VCV001045848 | 11               | 17771804       | 1045848     | 1030145     | rs200015927  | Neutral    | 0.714    | 0.157        | 0.129    |
| KCNC1 | 237 | R   | W   | NM_001112741.2(KCNC1):c.709C>T (p.Arg237Trp)  | Epilepsy, progressive myoclonic 7 | Uncertain significance(Last reviewed: Feb 18, 2020) | criteria provided, single submitter                  | VCV000578002 | 11               | 17771803       | 578002      | 570413      | rs150993414  | LOF        | 0.725    | 0.152        | 0.123    |
| KCNC1 | 248 | I   | T   | NM_001112741.2(KCNC1):c.743T>C (p.Ile248Thr)  | not provided                      | Uncertain significance(Last reviewed: Jul 1, 2018)  | criteria provided, single submitter                  | VCV000623766 | 11               | 17771837       | 623766      | 612903      | rs1565162643 | LOF        | 0.877    | 0.053        | 0.07     |
| KCNC1 | 259 | E   | K   | NM_001112741.2(KCNC1):c.775G>A (p.Glu259Lys)  | Epilepsy, progressive myoclonic 7 | Uncertain significance(Last reviewed: Apr 18, 2019) | criteria provided, single submitter                  | VCV000944058 | 11               | 17771869       | 944058      | 926164      | rs1849234046 | LOF        | 0.865    | 0.046        | 0.089    |
| KCNC1 | 263 | R   | H   | NM_001112741.2(KCNC1):c.788G>A (p.Arg263His)  | Epilepsy, progressive myoclonic 7 | Uncertain significance(Last reviewed: Jul 12, 2018) | criteria provided, single submitter                  | VCV000570230 | 11               | 17771882       | 570230      | 564518      | rs775163829  | LOF        | 0.885    | 0.035        | 0.08     |
| KCNC1 | 269 | N   | S   | NM_001112741.2(KCNC1):c.806A>G (p.Asn269Ser)  | Epilepsy, progressive myoclonic 7 | Uncertain significance(Last reviewed: Feb 6, 2020)  | criteria provided, single submitter                  | VCV001058747 | 11               | 17771900       | 1058747     | 1047132     | NA           | LOF        | 0.76     | 0.083        | 0.157    |
| KCNC1 | 283 | F   | L   | NM_001112741.2(KCNC1):c.847T>C (p.Phe283Leu)  | Epilepsy, progressive myoclonic 7 | Uncertain significance(Last reviewed: Dec 16, 2020) | criteria provided, single submitter                  | VCV001333779 | 11               | 17771941       | 1333779     | 1324549     | NA           | LOF        | 0.835    | 0.079        | 0.086    |
| KCNC1 | 287 | L   | M   | NM_001112741.2(KCNC1):c.859C>A (p.Leu287Met)  | Epilepsy, progressive myoclonic 7 | Uncertain significance(Last reviewed: Oct 29, 2020) | criteria provided, single submitter                  | VCV001035028 | 11               | 17771953       | 1035028     | 1030146     | rs1849234887 | LOF        | 0.848    | 0.071        | 0.082    |
| KCNC1 | 306 | V   | L   | NM_001112741.2(KCNC1):c.916G>T (p.Val306Leu)  | not provided                      | Uncertain significance(Last reviewed: May 25, 2017) | criteria provided, single submitter                  | VCV000430428 | 11               | 17772010       | 430428      | 421844      | rs369830206  | LOF        | 0.858    | 0.055        | 0.087    |
| KCNC1 | 316 | V   | M   | NM_001112741.2(KCNC1):c.946G>A (p.Val316Met)  | not provided                      | Uncertain significance(Last reviewed: Apr 5, 2021)  | criteria provided, single submitter                  | VCV001314562 | 11               | 17772040       | 1314562     | 1304823     | NA           | LOF        | 0.87     | 0.048        | 0.082    |
| KCNC1 | 317 | R   | H   | NM_001112741.2(KCNC1):c.950G>A (p.Arg317His)  | Inborn genetic diseases           | Uncertain significance(Last reviewed: Oct 16, 2017) | criteria provided, single submitter                  | VCV000522132 | 11               | 17772044       | 522132      | 511905      | rs1554991338 | LOF        | 0.867    | 0.033        | 0.1      |
| KCNC1 | 320 | R   | H   | NM_001112741.2(KCNC1):c.959G>A (p.Arg320His)  | Epilepsy, progressive myoclonic 7 | Pathogenic(Last reviewed: Jan 24, 2020)             | criteria provided, multiple submitters, no conflicts | VCV000162519 | 11               | 17772053       | 162519      | 172192      | rs727502818  | LOF        | 0.852    | 0.031        | 0.116    |
| KCNC1 | 365 | Y   | C   | NM_001112741.2(KCNC1):c.1094A>G (p.Tyr365Cys) | not provided                      | Uncertain significance(Last reviewed: Mar 14, 2019) | criteria provided, single submitter                  | VCV001307988 | 11               | 17772188       | 1307988     | 1297935     | NA           | LOF        | 0.879    | 0.049        | 0.072    |
| KCNC1 | 385 | K   | T   | NM_001112741.2(KCNC1):c.1154A>C (p.Lys385Thr) | Epilepsy, progressive myoclonic 7 | Uncertain significance(Last reviewed: Jul 5, 2017)  | criteria provided, single submitter                  | VCV000475346 | 11               | 17772248       | 475346      | 461324      | rs1554991360 | LOF        | 0.79     | 0.078        | 0.132    |
| KCNC1 | 408 | P   | L   | NM_001112741.2(KCNC1):c.1223C>T (p.Pro408Leu) | Epilepsy, progressive myoclonic 7 | Uncertain significance(Last reviewed: Feb 24,       | criteria provided, single submitter                  | VCV000961788 | 11               | 17772317       | 961788      | 947378      | rs1355766508 | LOF        | 0.86     | 0.049        | 0.092    |

| gene  | pos | aa1 | aa2 | Name                                          | Condition(s)                                    | Clinical significance (Last reviewed)                                     | Review status                                        | Accession    | GRCh38Chromosome | GRCh38Location | VariationID | AlleleID(s) | dbSNP ID     | prediction | prob.LOF | prob.Neutral | prob.GOF |
|-------|-----|-----|-----|-----------------------------------------------|-------------------------------------------------|---------------------------------------------------------------------------|------------------------------------------------------|--------------|------------------|----------------|-------------|-------------|--------------|------------|----------|--------------|----------|
|       |     |     |     |                                               |                                                 | 2020)                                                                     |                                                      |              |                  |                |             |             |              |            |          |              |          |
| KCNC1 | 418 | A   | S   | NM_001112741.2(KCNC1):c.1262G>T (p.Ala418Ser) | Epilepsy, progressive myoclonic 7[not provided] | Uncertain significance(Last reviewed: Sep 17, 2020)                       | criteria provided, multiple submitters, no conflicts | VCV001036828 | 11               | 17772346       | 1036828     | 1030147     | rs1849239426 | LOF        | 0.881    | 0.045        | 0.074    |
| KCNC1 | 421 | A   | T   | NM_001112741.2(KCNC1):c.1261G>A (p.Ala421Thr) | Epilepsy, progressive myoclonic 7               | Uncertain significance(Last reviewed: Apr 5, 2018)                        | criteria provided, single submitter                  | VCV000566539 | 11               | 17772355       | 566539      | 564523      | rs1565162836 | LOF        | 0.884    | 0.037        | 0.079    |
| KCNC1 | 421 | A   | V   | NM_001112741.2(KCNC1):c.1262C>T (p.Ala421Val) | Epilepsy, progressive myoclonic 7[not provided] | Pathogenic/Likely pathogenic(Last reviewed: Sep 9, 2020)                  | criteria provided, multiple submitters, no conflicts | VCV000488536 | 11               | 17772356       | 488536      | 481404      | rs1554991378 | LOF        | 0.869    | 0.042        | 0.089    |
| KCNC1 | 425 | V   | E   | NM_001112741.2(KCNC1):c.1274T>A (p.Val425Glu) | Epilepsy, progressive myoclonic 7               | Uncertain significance(Last reviewed: Nov 3, 2021)                        | criteria provided, single submitter                  | VCV001319331 | 11               | 17772368       | 1319331     | 1309584     | NA           | LOF        | 0.891    | 0.044        | 0.065    |
| KCNC1 | 425 | V   | M   | NM_001112741.2(KCNC1):c.1273G>A (p.Val425Met) | not provided                                    | Likely pathogenic(Last reviewed: Apr 5, 2017)                             | criteria provided, single submitter                  | VCV000426760 | 11               | 17772367       | 426760      | 415258      | rs1085307785 | LOF        | 0.864    | 0.049        | 0.086    |
| KCNC1 | 432 | V   | L   | NM_001112741.2(KCNC1):c.1294G>C (p.Val432Leu) | Epilepsy, progressive myoclonic 7               | Likely pathogenic(Last reviewed: Oct 19, 2018)                            | criteria provided, single submitter                  | VCV000813805 | 11               | 17772388       | 813805      | 802001      | NA           | LOF        | 0.853    | 0.056        | 0.091    |
| KCNC1 | 432 | V   | M   | NM_001112741.2(KCNC1):c.1294G>A (p.Val432Met) | Inborn genetic diseases[not provided]           | Conflicting interpretations of pathogenicity(Last reviewed: Jun 29, 2021) | criteria provided, conflicting interpretations       | VCV000392871 | 11               | 17772388       | 392871      | 373997      | rs1057524670 | LOF        | 0.863    | 0.05         | 0.087    |
| KCNC1 | 434 | V   | L   | NM_001112741.2(KCNC1):c.1300G>C (p.Val434Leu) | Epilepsy, progressive myoclonic 7[not provided] | Uncertain significance(Last reviewed: May 28, 2019)                       | criteria provided, multiple submitters, no conflicts | VCV000835488 | 11               | 17772394       | 835488      | 838168      | rs1849240404 | LOF        | 0.853    | 0.056        | 0.091    |
| KCNC1 | 441 | M   | L   | NM_001112741.2(KCNC1):c.1321A>T (p.Met441Leu) | Epilepsy, progressive myoclonic 7               | Uncertain significance(Last reviewed: Apr 9, 2020)                        | criteria provided, single submitter                  | VCV000848761 | 11               | 17772415       | 848761      | 838169      | rs1849240546 | LOF        | 0.835    | 0.063        | 0.102    |
| KCNC1 | 462 | R   | W   | NM_001112741.2(KCNC1):c.1384C>T (p.Arg462Trp) | not provided                                    | Uncertain significance(Last reviewed: Oct 30, 2020)                       | criteria provided, single submitter                  | VCV001256593 | 11               | 17772478       | 1256593     | 1246522     | NA           | Neutral    | 0.593    | 0.24         | 0.167    |
| KCNC1 | 464 | P   | L   | NM_001112741.2(KCNC1):c.1391C>T (p.Pro464Leu) | Epilepsy, progressive myoclonic 7               | Uncertain significance(Last reviewed: Mar 6, 2020)                        | criteria provided, single submitter                  | VCV001026165 | 11               | 17772485       | 1026165     | 1009603     | rs899899700  | Neutral    | 0.56     | 0.252        | 0.188    |
| KCNC1 | 467 | G   | R   | NM_001112741.2(KCNC1):c.1399G>C (p.Gly467Arg) | Epilepsy, progressive myoclonic 7               | Uncertain significance(Last reviewed: Jul 27, 2018)                       | criteria provided, single submitter                  | VCV000645528 | 11               | 17772493       | 645528      | 639849      | rs1477026732 | Neutral    | 0.583    | 0.202        | 0.215    |
| KCNC1 | 470 | N   | S   | NM_001112741.2(KCNC1):c.1409A>G (p.Asn470Ser) | Epilepsy, progressive myoclonic 7               | Uncertain significance(Last reviewed: Aug 14, 2019)                       | criteria provided, single submitter                  | VCV000931673 | 11               | 17772503       | 931673      | 919346      | rs143588903  | GOF        | 0.545    | 0.202        | 0.253    |
| KCNC1 | 474 | S   | C   | NM_001112741.2(KCNC1):c.1421C>G (p.Ser474Cys) | Epilepsy, progressive myoclonic 7               | Uncertain significance(Last reviewed: Feb 1, 2020)                        | criteria provided, single submitter                  | VCV000851860 | 11               | 17772515       | 851860      | 838170      | rs1554991422 | Neutral    | 0.614    | 0.21         | 0.176    |



| gene  | pos | aa1 | aa2 | Name                                          | Condition(s)                                                          | Clinical significance (Last reviewed)                                     | Review status                                  | Accession    | GRCh38Chromosome | GRCh38Location | VariationID | AlleleID(s) | dbSNP ID     | prediction | prob.LOF | prob.Neutral | prob.GOF |
|-------|-----|-----|-----|-----------------------------------------------|-----------------------------------------------------------------------|---------------------------------------------------------------------------|------------------------------------------------|--------------|------------------|----------------|-------------|-------------|--------------|------------|----------|--------------|----------|
| KCNC1 | 474 | S   | Y   | NM_001112741.2(KCNC1):c.1421C>A (p.Ser474Tyr) | Epilepsy, progressive myoclonic 7                                     | Uncertain significance(Last reviewed: Mar 21, 2017)                       | criteria provided, single submitter            | VCV000475349 | 11               | 17772515       | 475349      | 461328      | rs1554991422 | Neutral    | 0.614    | 0.19         | 0.196    |
| KCNC1 | 475 | V   | I   | NM_001112741.2(KCNC1):c.1423G>A (p.Val475Ile) | not provided                                                          | Uncertain significance(Last reviewed: Aug 13, 2019)                       | criteria provided, single submitter            | VCV001307853 | 11               | 17772517       | 1307853     | 1297800     | NA           | Neutral    | 0.669    | 0.195        | 0.136    |
| KCNC1 | 476 | V   | I   | NM_001112741.2(KCNC1):c.1426G>A (p.Val476Ile) | Seizures Epilepsy, progressive myoclonic 7 not specified not provided | Conflicting interpretations of pathogenicity(Last reviewed: Sep 17, 2020) | criteria provided, conflicting interpretations | VCV000218659 | 11               | 17772520       | 218659      | 215431      | rs146311746  | Neutral    | 0.661    | 0.201        | 0.138    |
| KCNC1 | 477 | N   | S   | NM_001112741.2(KCNC1):c.1430A>G (p.Asn477Ser) | Epilepsy, progressive myoclonic 7                                     | Uncertain significance(Last reviewed: Aug 20, 2020)                       | criteria provided, single submitter            | VCV000850956 | 11               | 17772524       | 850956      | 838171      | rs1849241725 | Neutral    | 0.519    | 0.257        | 0.224    |
| KCNC1 | 478 | S   | A   | NM_001112741.2(KCNC1):c.1432T>G (p.Ser478Ala) | not provided                                                          | Uncertain significance(Last reviewed: Sep 17, 2019)                       | criteria provided, single submitter            | VCV001312325 | 11               | 17772526       | 1312325     | 1301707     | NA           | Neutral    | 0.568    | 0.23         | 0.202    |
| KCNC1 | 480 | H   | N   | NM_001112741.2(KCNC1):c.1438C>A (p.His480Asn) | Epilepsy, progressive myoclonic 7                                     | Uncertain significance(Last reviewed: Sep 5, 2017)                        | criteria provided, single submitter            | VCV000542106 | 11               | 17772532       | 542106      | 526065      | rs1554991425 | Neutral    | 0.553    | 0.24         | 0.207    |
| KCNC1 | 484 | Q   | E   | NM_001112741.2(KCNC1):c.1450C>G (p.Gln484Glu) | Epilepsy, progressive myoclonic 7 not provided                        | Conflicting interpretations of pathogenicity(Last reviewed: Jul 11, 2019) | criteria provided, conflicting interpretations | VCV000475351 | 11               | 17772544       | 475351      | 461345      | rs376505218  | Neutral    | 0.553    | 0.237        | 0.21     |
| KCNC1 | 484 | Q   | R   | NM_001112741.2(KCNC1):c.1451A>G (p.Gln484Arg) | Epilepsy, progressive myoclonic 7                                     | Benign(Last reviewed: Dec 31, 2019)                                       | criteria provided, single submitter            | VCV000708688 | 11               | 17772545       | 708688      | 724342      | rs770586397  | Neutral    | 0.536    | 0.231        | 0.234    |
| KCNC1 | 502 | D   | G   | NM_001112741.2(KCNC1):c.1505A>G (p.Asp502Gly) | Epilepsy, progressive myoclonic 7                                     | Uncertain significance(Last reviewed: Sep 14, 2018)                       | criteria provided, single submitter            | VCV000650375 | 11               | 17779456       | 650375      | 639850      | rs1590109843 | Neutral    | 0.66     | 0.208        | 0.132    |
| KCNC1 | 502 | G   | N   | NM_001112741.2(KCNC1):c.1504G>A (p.Asp502Asn) | Epilepsy, progressive myoclonic 7                                     | Uncertain significance(Last reviewed: Sep 21, 2019)                       | criteria provided, single submitter            | VCV000960153 | 11               | 17772598       | 960153      | 947379      | rs1849242580 | Neutral    | 0.661    | 0.2          | 0.139    |
| KCNC1 | 510 | A   | V   | NM_001112741.2(KCNC1):c.1529C>T (p.Ala510Val) | Epilepsy, progressive myoclonic 7                                     | Uncertain significance(Last reviewed: Jan 7, 2020)                        | criteria provided, single submitter            | VCV000946569 | 11               | 17779480       | 946569      | 926165      | rs1849322367 | Neutral    | 0.631    | 0.208        | 0.161    |
| KCNC2 | 382 | F   | C   | NM_139137.4(KCNC2):c.1145T>G (p.Phe382Cys)    | not provided                                                          | Uncertain significance(Last reviewed: Feb 1, 2020)                        | criteria provided, single submitter            | VCV000916302 | 12               | 75050860       | 916302      | 904574      | rs1881091856 | LOF        | 0.861    | 0.055        | 0.084    |
| KCNC2 | 469 | V   | L   | NM_139137.4(KCNC2):c.1405G>T (p.Val469Leu)    | KCNC2-related disorder                                                | Uncertain significance(Last reviewed: Apr 7, 2021)                        | criteria provided, single submitter            | VCV001172543 | 12               | 75050600       | 1172543     | 1161647     | NA           | LOF        | 0.858    | 0.051        | 0.09     |
| KCNC2 | 470 | P   | S   | NM_139137.4(KCNC2):c.1408C>T (p.Pro470Ser)    | not provided                                                          | Uncertain significance(Last reviewed: Sep 1, 2019)                        | criteria provided, single submitter            | VCV000872705 | 12               | 75050597       | 872705      | 860011      | rs1881066861 | LOF        | 0.883    | 0.033        | 0.084    |
| KCNC3 | 8   | S   | W   | NM_004977.3(KCNC3):c.23C>G (p.Ser8Trp)        | not provided not specified                                            | Conflicting interpretations of pathogenicity(Last reviewed: Apr 14, 2017) | criteria provided, conflicting interpretations | VCV000447623 | 19               | 50329060       | 447623      | 442247      | rs761806977  | Neutral    | 0.653    | 0.2          | 0.147    |

| gene  | pos | aa1 | aa2 | Name                                       | Condition(s)                                              | Clinical significance (Last reviewed)                                     | Review status                                        | Accession    | GRCh38Chromosome | GRCh38Location | VariationID | AlleleID(s) | dbSNP ID     | prediction | prob.LOF | prob.Neutral | prob.GOF |
|-------|-----|-----|-----|--------------------------------------------|-----------------------------------------------------------|---------------------------------------------------------------------------|------------------------------------------------------|--------------|------------------|----------------|-------------|-------------|--------------|------------|----------|--------------|----------|
| KCNC3 | 16  | A   | T   | NM_004977.3(KCNC3):c.46G>A (p.Ala16Thr)    | not provided                                              | Likely benign(Last reviewed: Jul 31, 2016)                                | criteria provided, single submitter                  | VCV000374785 | 19               | 50329037       | 374785      | 361671      | rs1057519247 | Neutral    | 0.622    | 0.23         | 0.148    |
| KCNC3 | 24  | P   | L   | NM_004977.3(KCNC3):c.71C>T (p.Pro24Leu)    | not provided                                              | Conflicting interpretations of pathogenicity(Last reviewed: Sep 19, 2018) | criteria provided, conflicting interpretations       | VCV000718964 | 19               | 50329012       | 718964      | 728360      | rs775818633  | Neutral    | 0.616    | 0.234        | 0.15     |
| KCNC3 | 41  | Q   | H   | NM_004977.3(KCNC3):c.123G>T (p.Gln41His)   | not provided not specified                                | Benign/Likely benign(Last reviewed: May 4, 2021)                          | criteria provided, multiple submitters, no conflicts | VCV000284725 | 19               | 50328960       | 284725      | 268962      | rs185017345  | Neutral    | 0.603    | 0.249        | 0.148    |
| KCNC3 | 43  | P   | S   | NM_004977.3(KCNC3):c.127C>T (p.Pro43Ser)   | not specified                                             | Benign(Last reviewed: Apr 13, 2017)                                       | criteria provided, single submitter                  | VCV000447619 | 19               | 50328956       | 447619      | 442246      | rs928573902  | Neutral    | 0.554    | 0.272        | 0.174    |
| KCNC3 | 47  | G   | D   | NM_004977.3(KCNC3):c.140G>A (p.Gly47Asp)   | Spinocerebellar ataxia type 13                            | Uncertain significance(Last reviewed: Jun 16, 2020)                       | criteria provided, single submitter                  | VCV001029909 | 19               | 50328943       | 1029909     | 1018622     | rs2037143763 | Neutral    | 0.603    | 0.249        | 0.147    |
| KCNC3 | 63  | D   | G   | NM_004977.3(KCNC3):c.188A>G (p.Asp63Gly)   | Spinocerebellar ataxia type 13 not provided not specified | Benign(Last reviewed: Aug 19, 2021)                                       | criteria provided, multiple submitters, no conflicts | VCV000193297 | 19               | 50328895       | 193297      | 190461      | rs375912738  | Neutral    | 0.564    | 0.26         | 0.176    |
| KCNC3 | 136 | N   | D   | NM_004977.3(KCNC3):c.634A>G (p.Asn212Asp)  | not provided                                              | Uncertain significance(Last reviewed: Nov 6, 2019)                        | criteria provided, single submitter                  | VCV001309681 | 19               | 50328449       | 1309681     | 1299056     | NA           | LOF        | 0.8      | 0.111        | 0.089    |
| KCNC3 | 141 | A   | T   | NM_004977.3(KCNC3):c.649G>A (p.Ala217Thr)  | not provided                                              | Benign(Last reviewed: Dec 31, 2019)                                       | criteria provided, single submitter                  | VCV000712000 | 19               | 50328434       | 712000      | 728359      | rs373416318  | LOF        | 0.788    | 0.059        | 0.153    |
| KCNC3 | 257 | P   | T   | NM_004977.3(KCNC3):c.769C>A (p.Pro257Thr)  | Inborn genetic diseases not provided                      | Uncertain significance(Last reviewed: May 8, 2020)                        | criteria provided, multiple submitters, no conflicts | VCV000521572 | 19               | 50328314       | 521572      | 512432      | rs1232558368 | Neutral    | 0.48     | 0.307        | 0.213    |
| KCNC3 | 271 | F   | L   | NM_004977.3(KCNC3):c.1041C>G (p.Phe347Leu) | not provided                                              | Uncertain significance(Last reviewed: Feb 1, 2021)                        | criteria provided, single submitter                  | VCV001256130 | 19               | 50323912       | 1256130     | 1246060     | NA           | LOF        | 0.749    | 0.079        | 0.172    |
| KCNC3 | 331 | G   | R   | NM_004977.3(KCNC3):c.991G>A (p.Gly331Arg)  | not provided Spinocerebellar ataxia type 13               | Uncertain significance(Last reviewed: Jul 12, 2019)                       | criteria provided, multiple submitters, no conflicts | VCV000586086 | 19               | 50323962       | 586086      | 577817      | rs1305901422 | Neutral    | 0.53     | 0.325        | 0.144    |
| KCNC3 | 332 | D   | G   | NM_004977.3(KCNC3):c.1223A>G (p.Asp408Gly) | Spinocerebellar ataxia type 13                            | Likely pathogenic(Last reviewed: Jul 2, 2019)                             | criteria provided, single submitter                  | VCV000976029 | 19               | 50323730       | 976029      | 964525      | rs2037067131 | Neutral    | 0.604    | 0.255        | 0.141    |
| KCNC3 | 337 | I   | T   | NM_004977.3(KCNC3):c.1010T>C (p.Ile337Thr) | not provided                                              | Uncertain significance(Last reviewed: Aug 6, 2018)                        | criteria provided, single submitter                  | VCV000391603 | 19               | 50323943       | 391603      | 377895      | rs1057524161 | Neutral    | 0.674    | 0.186        | 0.14     |
| KCNC3 | 380 | A   | T   | NM_004977.3(KCNC3):c.1366G>A (p.Ala456Thr) | not provided                                              | Uncertain significance(Last reviewed: Sep 16, 2019)                       | criteria provided, single submitter                  | VCV001311117 | 19               | 50323587       | 1311117     | 1300498     | NA           | LOF        | 0.781    | 0.073        | 0.146    |
| KCNC3 | 387 | V   | A   | NM_004977.3(KCNC3):c.1160T>C (p.Val387Ala) | not provided                                              | Uncertain significance(Last reviewed: Aug 1, 2019)                        | criteria provided, single submitter                  | VCV000871011 | 19               | 50323793       | 871011      | 860601      | rs2037067867 | LOF        | 0.714    | 0.056        | 0.23     |

| gene  | pos | aa1 | aa2 | Name                                       | Condition(s)                                                          | Clinical significance (Last reviewed)                                     | Review status                                        | Accession    | GRCh38Chromosome | GRCh38Location | VariationID | AlleleID(s) | dbSNP ID     | prediction | prob.LOF | prob.Neutral | prob.GOF |
|-------|-----|-----|-----|--------------------------------------------|-----------------------------------------------------------------------|---------------------------------------------------------------------------|------------------------------------------------------|--------------|------------------|----------------|-------------|-------------|--------------|------------|----------|--------------|----------|
| KCNC3 | 399 | S   | L   | NM_004977.3(KCNC3):c.1196C>T (p.Ser399Leu) | not provided not specified                                            | Conflicting interpretations of pathogenicity(Last reviewed: Mar 24, 2020) | criteria provided, conflicting interpretations       | VCV000447618 | 19               | 50323757       | 447618      | 442244      | rs1437049667 | LOF        | 0.754    | 0.12         | 0.126    |
| KCNC3 | 410 | L   | P   | NM_004977.3(KCNC3):c.1229T>C (p.Leu410Pro) | not provided                                                          | Uncertain significance(Last reviewed: Dec 31, 2018)                       | criteria provided, single submitter                  | VCV000804959 | 19               | 50323724       | 804959      | 793807      | rs1601098675 | LOF        | 0.844    | 0.056        | 0.1      |
| KCNC3 | 420 | R   | H   | NM_004977.3(KCNC3):c.1259G>A (p.Arg420His) | not provided Spinocerebellar ataxia type 13                           | Pathogenic(Last reviewed: Dec 28, 2018)                                   | criteria provided, multiple submitters, no conflicts | VCV000013473 | 19               | 50323694       | 13473       | 28512       | rs104894699  | LOF        | 0.864    | 0.036        | 0.1      |
| KCNC3 | 423 | R   | H   | NM_004977.3(KCNC3):c.1268G>A (p.Arg423His) | Spinocerebellar ataxia type 13(not provided)  Inborn genetic diseases | Pathogenic(Last reviewed: Feb 10, 2022)                                   | criteria provided, multiple submitters, no conflicts | VCV000208671 | 19               | 50323685       | 208671      | 205316      | rs797044872  | LOF        | 0.85     | 0.038        | 0.112    |
| KCNC3 | 426 | T   | M   | NM_004977.3(KCNC3):c.1505C>T (p.Thr502Met) | not provided                                                          | Uncertain significance(Last reviewed: Apr 26, 2019)                       | criteria provided, single submitter                  | VCV001305210 | 19               | 50323448       | 1305210     | 1295485     | NA           | LOF        | 0.846    | 0.036        | 0.118    |
| KCNC3 | 428 | T   | I   | NM_004977.3(KCNC3):c.1283C>T (p.Thr428Ile) | Spinocerebellar ataxia type 13                                        | Pathogenic(Last reviewed: Jul 20, 2016)                                   | no assertion criteria provided                       | VCV000245604 | 19               | 50323670       | 245604      | 245205      | rs879253883  | LOF        | 0.842    | 0.036        | 0.122    |
| KCNC3 | 448 | F   | L   | NM_004977.3(KCNC3):c.1344C>G (p.Phe448Leu) | not provided                                                          | Pathogenic(Last reviewed: Nov 3, 2016)                                    | no assertion criteria provided                       | VCV000545048 | 19               | 50323609       | 545048      | 535339      | rs104894700  | GOF        | 0.473    | 0.053        | 0.474    |
| KCNC3 | 448 | F   | L   | NM_004977.3(KCNC3):c.1344C>G (p.Phe448Leu) | not provided                                                          | Pathogenic(Last reviewed: Nov 3, 2016)                                    | no assertion criteria provided                       | VCV000545048 | 19               | 50323609       | 545048      | 535339      | rs104894700  | GOF        | 0.473    | 0.053        | 0.474    |
| KCNC3 | 448 | F   | L   | NM_004977.3(KCNC3):c.1344C>A (p.Phe448Leu) | Spinocerebellar ataxia type 13                                        | Pathogenic(Last reviewed: Apr 1, 2006)                                    | no assertion criteria provided                       | VCV000013474 | 19               | 50323609       | 13474       | 28513       | rs104894700  | GOF        | 0.473    | 0.053        | 0.474    |
| KCNC3 | 448 | F   | L   | NM_004977.3(KCNC3):c.1344C>A (p.Phe448Leu) | Spinocerebellar ataxia type 13                                        | Pathogenic(Last reviewed: Apr 1, 2006)                                    | no assertion criteria provided                       | VCV000013474 | 19               | 50323609       | 13474       | 28513       | rs104894700  | GOF        | 0.473    | 0.053        | 0.474    |
| KCNC3 | 477 | D   | N   | NM_004977.3(KCNC3):c.1429G>A (p.Asp477Asn) | not provided                                                          | Uncertain significance(Last reviewed: May 4, 2015)                        | criteria provided, single submitter                  | VCV000195233 | 19               | 50323524       | 195233      | 192394      | rs148033381  | Neutral    | 0.451    | 0.398        | 0.151    |
| KCNC3 | 490 | P   | S   | NM_004977.3(KCNC3):c.1696C>T (p.Pro566Ser) | not provided                                                          | Uncertain significance(Last reviewed: Feb 4, 2020)                        | criteria provided, single submitter                  | VCV001211248 | 19               | 50323257       | 1211248     | 1201246     | NA           | LOF        | 0.838    | 0.065        | 0.097    |
| KCNC3 | 509 | M   | V   | NM_004977.3(KCNC3):c.1525A>G (p.Met509Val) | not specified                                                         | Uncertain significance(Last reviewed: Apr 28, 2017)                       | criteria provided, single submitter                  | VCV000447621 | 19               | 50323428       | 447621      | 442242      | rs1555781403 | LOF        | 0.738    | 0.096        | 0.166    |
| KCNC3 | 514 | G   | S   | NM_004977.3(KCNC3):c.1768G>A (p.Gly590Ser) | Toe walking not provided                                              | Uncertain significance(Last reviewed: Feb 17, 2021)                       | criteria provided, multiple submitters, no conflicts | VCV000916249 | 19               | 50323185       | 916249      | 904687      | rs1167185763 | LOF        | 0.747    | 0.137        | 0.116    |
| KCNC3 | 528 | V   | G   | NM_004977.3(KCNC3):c.1583T>G (p.Val528Gly) | Spinocerebellar ataxia type 13                                        | Uncertain significance(Last reviewed: May 28, 2019)                       | criteria provided, single submitter                  | VCV000803574 | 19               | 50323370       | 803574      | 791945      | rs1601098237 | LOF        | 0.697    | 0.088        | 0.215    |
| KCNC3 | 539 | A   | V   | NM_004977.3(KCNC3):c.1844C>T (p.Ala615Val) | not provided                                                          | Uncertain significance(Last reviewed: May 28, 2019)                       | criteria provided, single submitter                  | VCV000804961 | 19               | 50323109       | 804961      | 793805      | rs1432486680 | GOF        | 0.655    | 0.059        | 0.286    |

| gene  | pos | aa1 | aa2 | Name                                       | Condition(s)                   | Clinical significance (Last reviewed)               | Review status                                        | Accession    | GRCh38Chromosome | GRCh38Location | VariationID | AlleleID(s) | dbSNP ID     | prediction | prob.LOF | prob.Neutral | prob.GOF |  |
|-------|-----|-----|-----|--------------------------------------------|--------------------------------|-----------------------------------------------------|------------------------------------------------------|--------------|------------------|----------------|-------------|-------------|--------------|------------|----------|--------------|----------|--|
|       |     |     |     |                                            |                                |                                                     | reviewed: Oct 22, 2019)                              |              |                  |                |             |             |              |            |          |              |          |  |
| KCNC3 | 541 | P   | L   | NM_004977.3(KCNC3):c.1850C>T (p.Pro617Leu) | Spinocerebellar ataxia type 13 | Uncertain significance(Last reviewed: Dec 18, 2020) | multiple submitters, no conflicts                    | VCV001064691 | 19               | 50323103       | 1064691     | 1052974     | NA           | LOF        | 0.7      | 0.119        | 0.182    |  |
| KCNC3 | 549 | R   | S   | NM_004977.3(KCNC3):c.1875G>T (p.Arg625Ser) | not provided                   | Benign(Last reviewed: Nov 6, 2018)                  | criteria provided, single submitter                  | VCV000804962 | 19               | 50323078       | 804962      | 793804      | rs537912602  | Neutral    | 0.673    | 0.162        | 0.165    |  |
| KCNC3 | 550 | M   | V   | NM_004977.3(KCNC3):c.1648A>G (p.Met550Val) | not provided                   | Uncertain significance(Last reviewed: Aug 30, 2021) | criteria provided, single submitter                  | VCV000424001 | 19               | 50323305       | 424001      | 410666      | rs1064796737 | LOF        | 0.66     | 0.136        | 0.205    |  |
| KCNC3 | 565 | R   | W   | NM_004977.3(KCNC3):c.1693C>T (p.Arg565Trp) | not provided                   | Uncertain significance(Last reviewed: Oct 20, 2019) | criteria provided, single submitter                  | VCV000424152 | 19               | 50323260       | 424152      | 410665      | rs750349505  | Neutral    | 0.557    | 0.292        | 0.15     |  |
| KCNC3 | 587 | P   | L   | NM_004977.3(KCNC3):c.1760C>T (p.Pro587Leu) | not provided                   | Benign(Last reviewed: Mar 30, 2018)                 | criteria provided, single submitter                  | VCV000586083 | 19               | 50323193       | 586083      | 577812      | rs554197864  | Neutral    | 0.53     | 0.338        | 0.133    |  |
| KCNC3 | 588 | N   | S   | NM_004977.3(KCNC3):c.1991A>G (p.Asn664Ser) | not provided                   | Likely benign(Last reviewed: Jul 1, 2020)           | criteria provided, single submitter                  | VCV000995164 | 19               | 50320772       | 995164      | 983184      | rs199833067  | Neutral    | 0.503    | 0.35         | 0.148    |  |
| KCNC3 | 591 | S   | G   | NM_004977.3(KCNC3):c.1771A>G (p.Ser591Gly) | not specified not provided     | Benign(Last reviewed: Nov 26, 2020)                 | criteria provided, multiple submitters, no conflicts | VCV000710785 | 19               | 50323182       | 710785      | 728357      | rs549394447  | Neutral    | 0.608    | 0.257        | 0.135    |  |
| KCNC3 | 599 | E   | K   | NM_004977.3(KCNC3):c.2023G>A (p.Glu675Lys) | not provided                   | Uncertain significance(Last reviewed: Jan 12, 2021) | criteria provided, single submitter                  | VCV000995165 | 19               | 50320740       | 995165      | 983183      | rs758477949  | Neutral    | 0.409    | 0.394        | 0.197    |  |
| KCNC3 | 643 | G   | V   | NM_004977.3(KCNC3):c.2156G>T (p.Gly719Val) | not provided                   | Uncertain significance(Last reviewed: Aug 27, 2019) | criteria provided, single submitter                  | VCV001307976 | 19               | 50320607       | 1307976     | 1297923     | NA           | Neutral    | 0.46     | 0.381        | 0.158    |  |
| KCNC3 | 647 | P   | L   | NM_004977.3(KCNC3):c.1940C>T (p.Pro647Leu) | not specified                  | Uncertain significance(Last reviewed: Jan 5, 2016)  | criteria provided, single submitter                  | VCV000435548 | 19               | 50323013       | 435548      | 430262      | rs375737637  | Neutral    | 0.495    | 0.355        | 0.149    |  |
| KCNC3 | 652 | E   | K   | NM_004977.3(KCNC3):c.1954G>A (p.Glu652Lys) | not specified                  | Uncertain significance(Last reviewed: Aug 2, 2016)  | criteria provided, single submitter                  | VCV000435547 | 19               | 50322999       | 435547      | 430261      | rs1555781339 | Neutral    | 0.485    | 0.372        | 0.143    |  |
| KCNC3 | 673 | A   | T   | NM_004977.3(KCNC3):c.2245G>A (p.Ala749Thr) | not provided                   | Uncertain significance(Last reviewed: Sep 1, 2021)  | criteria provided, single submitter                  | VCV001298784 | 19               | 50320275       | 1298784     | 1288646     | NA           | Neutral    | 0.534    | 0.322        | 0.144    |  |
| KCNC3 | 693 | I   | M   | NM_004977.3(KCNC3):c.2079C>G (p.Ile693Met) | not provided                   | Likely pathogenic(Last reviewed: Oct 6, 2016)       | criteria provided, single submitter                  | VCV000422460 | 19               | 50320684       | 422460      | 410664      | rs1064795793 | Neutral    | 0.623    | 0.251        | 0.125    |  |
| KCNC3 | 698 | R   | H   | NM_004977.3(KCNC3):c.2093G>A (p.Arg698His) | not provided not specified     | Benign(Last reviewed: Sep 17, 2020)                 | criteria provided, multiple submitters, no conflicts | VCV000447622 | 19               | 50320670       | 447622      | 442241      | rs144957827  | Neutral    | 0.475    | 0.368        | 0.158    |  |
| KCND2 | 11  | F   | L   | NM_012281.3(KCND2):c.31T>C (p.Phe11Leu)    | Early myoclonic encephalopathy | Uncertain significance(Last reviewed: Apr 25,       | criteria provided, single submitter                  | VCV000569893 | 7                | 120274663      | 569893      | 561244      | rs142392153  | Neutral    | 0.673    | 0.167        | 0.16     |  |

| gene  | pos | aa1 | aa2 | Name                                      | Condition(s)                   | Clinical significance (Last reviewed)               | Review status                       | Accession    | GRCh38Chromosome | GRCh38Location | VariationID | AlleleID(s) | dbSNP ID     | prediction | prob.LOF | prob.Neutral | prob.GOF |
|-------|-----|-----|-----|-------------------------------------------|--------------------------------|-----------------------------------------------------|-------------------------------------|--------------|------------------|----------------|-------------|-------------|--------------|------------|----------|--------------|----------|
|       |     |     |     |                                           |                                | 2018)                                               |                                     |              |                  |                |             |             |              |            |          |              |          |
| KCND2 | 11  | F   | L   | NM_012281.3(KCND2):c.31T>C (p.Phe11Leu)   | Early myoclonic encephalopathy | Uncertain significance(Last reviewed: Apr 25, 2018) | criteria provided, single submitter | VCV000569893 | 7                | 120274663      | 569893      | 561244      | rs142392153  | Neutral    | 0.673    | 0.167        | 0.16     |
| KCND2 | 11  | F   | L   | NM_012281.3(KCND2):c.33T>G (p.Phe11Leu)   | Early myoclonic encephalopathy | Likely benign(Last reviewed: Feb 21, 2020)          | criteria provided, single submitter | VCV000947786 | 7                | 120274665      | 947786      | 924622      | rs35950053   | Neutral    | 0.673    | 0.167        | 0.16     |
| KCND2 | 11  | F   | L   | NM_012281.3(KCND2):c.33T>G (p.Phe11Leu)   | Early myoclonic encephalopathy | Likely benign(Last reviewed: Feb 21, 2020)          | criteria provided, single submitter | VCV000947786 | 7                | 120274665      | 947786      | 924622      | rs35950053   | Neutral    | 0.673    | 0.167        | 0.16     |
| KCND2 | 21  | P   | A   | NM_012281.3(KCND2):c.61C>G (p.Pro21Ala)   | Early myoclonic encephalopathy | Uncertain significance(Last reviewed: Sep 9, 2019)  | criteria provided, single submitter | VCV000954629 | 7                | 120274693      | 954629      | 945352      | rs1799145590 | LOF        | 0.742    | 0.064        | 0.194    |
| KCND2 | 22  | V   | L   | NM_012281.3(KCND2):c.64G>C (p.Val22Leu)   | Early myoclonic encephalopathy | Uncertain significance(Last reviewed: Feb 22, 2020) | criteria provided, single submitter | VCV000648141 | 7                | 120274696      | 648141      | 635565      | rs746823484  | LOF        | 0.759    | 0.146        | 0.095    |
| KCND2 | 26  | P   | S   | NM_012281.3(KCND2):c.76C>T (p.Pro26Ser)   | Early myoclonic encephalopathy | Uncertain significance(Last reviewed: Oct 3, 2020)  | criteria provided, single submitter | VCV001008472 | 7                | 120274708      | 1008472     | 991980      | rs373082898  | LOF        | 0.739    | 0.159        | 0.102    |
| KCND2 | 39  | Q   | E   | NM_012281.3(KCND2):c.115C>G (p.Gln39Glu)  | Early myoclonic encephalopathy | Uncertain significance(Last reviewed: Apr 10, 2019) | criteria provided, single submitter | VCV000947519 | 7                | 120274747      | 947519      | 924623      | rs1272011851 | Neutral    | 0.629    | 0.187        | 0.184    |
| KCND2 | 44  | V   | M   | NM_012281.3(KCND2):c.130G>A (p.Val44Met)  | Early myoclonic encephalopathy | Uncertain significance(Last reviewed: Feb 27, 2020) | criteria provided, single submitter | VCV001025284 | 7                | 120274762      | 1025284     | 1007134     | rs1799147199 | LOF        | 0.794    | 0.122        | 0.084    |
| KCND2 | 51  | R   | C   | NM_012281.3(KCND2):c.151C>T (p.Arg51Cys)  | Early myoclonic encephalopathy | Uncertain significance(Last reviewed: Mar 10, 2020) | criteria provided, single submitter | VCV001018504 | 7                | 120274783      | 1018504     | 1007135     | rs751823176  | LOF        | 0.772    | 0.13         | 0.098    |
| KCND2 | 63  | P   | L   | NM_012281.3(KCND2):c.188C>T (p.Pro63Leu)  | Early myoclonic encephalopathy | Uncertain significance(Last reviewed: Oct 21, 2020) | criteria provided, single submitter | VCV001038912 | 7                | 120274820      | 1038912     | 1027661     | rs1799148358 | Neutral    | 0.658    | 0.192        | 0.15     |
| KCND2 | 99  | Y   | C   | NM_012281.3(KCND2):c.296A>G (p.Tyr99Cys)  | Early myoclonic encephalopathy | Uncertain significance(Last reviewed: Oct 4, 2018)  | criteria provided, single submitter | VCV000639013 | 7                | 120274928      | 639013      | 635566      | rs1584706364 | LOF        | 0.672    | 0.124        | 0.204    |
| KCND2 | 100 | R   | L   | NM_012281.3(KCND2):c.299G>T (p.Arg100Leu) | Early myoclonic encephalopathy | Uncertain significance(Last reviewed: Dec 27, 2018) | criteria provided, single submitter | VCV000662969 | 7                | 120274931      | 662969      | 635567      | rs377746178  | GOF        | 0.618    | 0.049        | 0.333    |
| KCND2 | 108 | R   | C   | NM_012281.3(KCND2):c.322C>T (p.Arg108Cys) | Early myoclonic encephalopathy | Uncertain significance(Last reviewed: Dec 13, 2018) | criteria provided, single submitter | VCV000654476 | 7                | 120274954      | 654476      | 635568      | rs763189187  | LOF        | 0.715    | 0.101        | 0.184    |
| KCND2 | 108 | R   | H   | NM_012281.3(KCND2):c.323G>A (p.Arg108His) | Early myoclonic encephalopathy | Uncertain significance(Last reviewed: Oct 16, 2020) | criteria provided, single submitter | VCV001036551 | 7                | 120274955      | 1036551     | 1027662     | rs1799151446 | LOF        | 0.707    | 0.07         | 0.223    |
| KCND2 | 109 | H   | N   | NM_012281.3(KCND2):c.325C>A (p.His109Asn) | Early myoclonic encephalopathy | Uncertain significance(Last reviewed: Oct 16, 2020) | criteria provided, single submitter | VCV001063447 | 7                | 120274957      | 1063447     | 1044599     | NA           | GOF        | 0.637    | 0.092        | 0.271    |
| KCND2 | 120 | A   | D   | NM_012281.3(KCND2):c.359C>A               | Early myoclonic encephalopathy | Uncertain                                           | criteria                            | VCV001043092 | 7                | 120274991      | 1043092     | 1027663     | rs1199722034 | GOF        | 0.638    | 0.062        | 0.3      |

| gene  | pos | aa1 | aa2 | Name                                       | Condition(s)                                | Clinical significance (Last reviewed)               | Review status                                        | Accession    | GRCh38Chromosome | GRCh38Location | VariationID | AlleleID(s) | dbSNP ID     | prediction | prob.LOF | prob.Neutral | prob.GOF |
|-------|-----|-----|-----|--------------------------------------------|---------------------------------------------|-----------------------------------------------------|------------------------------------------------------|--------------|------------------|----------------|-------------|-------------|--------------|------------|----------|--------------|----------|
|       |     |     |     | (p.Ala120Asp)                              |                                             | significance(Last reviewed: Mar 26, 2020)           | provided, single submitter                           |              |                  |                |             |             |              |            |          |              |          |
| KCND2 | 129 | I   | V   | NM_012281.3(KCND2):c.385A>G (p.Ile129Val)  | Early myoclonic encephalopathy              | Uncertain significance(Last reviewed: Nov 13, 2018) | criteria provided, single submitter                  | VCV000645514 | 7                | 120275017      | 645514      | 635569      | rs1448870371 | LOF        | 0.713    | 0.156        | 0.131    |
| KCND2 | 197 | V   | I   | NM_012281.3(KCND2):c.589G>A (p.Val197Ile)  | Early myoclonic encephalopathy              | Uncertain significance(Last reviewed: Oct 3, 2020)  | criteria provided, single submitter                  | VCV000941432 | 7                | 120275221      | 941432      | 933611      | rs750056826  | Neutral    | 0.585    | 0.256        | 0.159    |
| KCND2 | 216 | I   | V   | NM_012281.3(KCND2):c.646A>G (p.Ile216Val)  | Early myoclonic encephalopathy              | Uncertain significance(Last reviewed: Aug 9, 2018)  | criteria provided, single submitter                  | VCV000652645 | 7                | 120275278      | 652645      | 635570      | rs373390097  | Neutral    | 0.689    | 0.191        | 0.12     |
| KCND2 | 218 | E   | Q   | NM_012281.3(KCND2):c.652G>C (p.Glu218Gln)  | Early myoclonic encephalopathy              | Uncertain significance(Last reviewed: Dec 10, 2018) | criteria provided, single submitter                  | VCV000663034 | 7                | 120275284      | 663034      | 635571      | rs1584706614 | GOF        | 0.675    | 0.084        | 0.24     |
| KCND2 | 235 | A   | V   | NM_012281.3(KCND2):c.704C>T (p.Ala235Val)  | Early myoclonic encephalopathy              | Uncertain significance(Last reviewed: Sep 6, 2019)  | criteria provided, single submitter                  | VCV000956493 | 7                | 120275336      | 956493      | 945353      | rs1398907255 | LOF        | 0.796    | 0.126        | 0.078    |
| KCND2 | 249 | A   | V   | NM_012281.3(KCND2):c.746C>T (p.Ala249Val)  | Early myoclonic encephalopathy              | Likely benign(Last reviewed: Nov 14, 2020)          | criteria provided, single submitter                  | VCV000460205 | 7                | 120275378      | 460205      | 456380      | rs146220085  | LOF        | 0.693    | 0.102        | 0.206    |
| KCND2 | 330 | S   | L   | NM_012281.3(KCND2):c.989C>T (p.Ser330Leu)  | Early myoclonic encephalopathy              | Uncertain significance(Last reviewed: Sep 27, 2018) | criteria provided, single submitter                  | VCV000657270 | 7                | 120275621      | 657270      | 635572      | rs1584706842 | LOF        | 0.764    | 0.105        | 0.13     |
| KCND2 | 333 | M   | V   | NM_012281.3(KCND2):c.997A>G (p.Met333Val)  | not provided                                | Uncertain significance(Last reviewed: Feb 28, 2020) | criteria provided, single submitter                  | VCV001299437 | 7                | 120275629      | 1299437     | 1289384     | NA           | Neutral    | 0.747    | 0.18         | 0.074    |
| KCND2 | 352 | S   | T   | NM_012281.3(KCND2):c.1055G>C (p.Ser352Thr) | Early myoclonic encephalopathy              | Uncertain significance(Last reviewed: Mar 10, 2020) | criteria provided, single submitter                  | VCV000859284 | 7                | 120275687      | 859284      | 832904      | rs765958038  | GOF        | 0.677    | 0.037        | 0.286    |
| KCND2 | 395 | V   | A   | NM_012281.3(KCND2):c.1184T>C (p.Val395Ala) | not provided                                | Uncertain significance(Last reviewed: Oct 10, 2019) | criteria provided, single submitter                  | VCV001308937 | 7                | 120732971      | 1308937     | 1300965     | NA           | Neutral    | 0.486    | 0.329        | 0.185    |
| KCND2 | 403 | P   | A   | NM_012281.3(KCND2):c.1207C>G (p.Pro403Ala) | Early myoclonic encephalopathy              | Uncertain significance(Last reviewed: Mar 9, 2020)  | criteria provided, single submitter                  | VCV001005965 | 7                | 120732994      | 1005965     | 991981      | rs1792826036 | LOF        | 0.847    | 0.055        | 0.097    |
| KCND2 | 403 | P   | L   | NM_012281.3(KCND2):c.1208C>T (p.Pro403Leu) | not provided Early myoclonic encephalopathy | Uncertain significance(Last reviewed: Oct 23, 2020) | criteria provided, multiple submitters, no conflicts | VCV001009567 | 7                | 120732995      | 1009567     | 991982      | rs750457269  | LOF        | 0.861    | 0.055        | 0.084    |
| KCND2 | 404 | V   | M   | NM_012281.3(KCND2):c.1210G>A (p.Val404Met) | not provided Early myoclonic encephalopathy | Pathogenic(Last reviewed: Feb 28, 2020)             | criteria provided, single submitter                  | VCV000144007 | 7                | 120732997      | 144007      | 153738      | rs587777631  | Neutral    | 0.516    | 0.384        | 0.1      |
| KCND2 | 413 | Y   | C   | NM_012281.3(KCND2):c.1238A>G (p.Tyr413Cys) | not provided                                | Uncertain significance(Last reviewed: Nov 8, 2017)  | criteria provided, single submitter                  | VCV000560272 | 7                | 120733025      | 560272      | 551298      | rs1562923143 | Neutral    | 0.65     | 0.175        | 0.175    |
| KCND2 | 434 | R   | W   | NM_012281.3(KCND2):c.1300C>T (p.Arg434Trp) | Early myoclonic encephalopathy              | Uncertain significance(Last reviewed: Oct 9,        | criteria provided, single submitter                  | VCV001019937 | 7                | 120741555      | 1019937     | 1007137     | rs376029594  | Neutral    | 0.726    | 0.174        | 0.101    |

| gene  | pos | aa1 | aa2 | Name                                       | Condition(s)                                                                                                  | Clinical significance (Last reviewed)                                     | Review status                                  | Accession    | GRCh38Chromosome | GRCh38Location | VariationID | AlleleID(s) | dbSNP ID     | prediction | prob.LOF | prob.Neutral | prob.GOF |
|-------|-----|-----|-----|--------------------------------------------|---------------------------------------------------------------------------------------------------------------|---------------------------------------------------------------------------|------------------------------------------------|--------------|------------------|----------------|-------------|-------------|--------------|------------|----------|--------------|----------|
|       |     |     |     |                                            |                                                                                                               | 2020)                                                                     |                                                |              |                  |                |             |             |              |            |          |              |          |
| KCND2 | 435 | A   | V   | NM_012281.3(KCND2):c.1304C>T (p.Ala435Val) | Early myoclonic encephalopathy                                                                                | Uncertain significance(Last reviewed: Jun 3, 2020)                        | criteria provided, single submitter            | VCV001042710 | 7                | 120741559      | 1042710     | 1027664     | rs1484410590 | Neutral    | 0.708    | 0.188        | 0.104    |
| KCND2 | 441 | A   | T   | NM_012281.3(KCND2):c.1321G>A (p.Ala441Thr) | Early myoclonic encephalopathy                                                                                | Uncertain significance(Last reviewed: Feb 4, 2019)                        | criteria provided, single submitter            | VCV000575507 | 7                | 120741576      | 575507      | 566333      | rs1417852990 | Neutral    | 0.703    | 0.19         | 0.107    |
| KCND2 | 442 | N   | S   | NM_012281.3(KCND2):c.1325A>G (p.Asn442Ser) | Early myoclonic encephalopathy                                                                                | Uncertain significance(Last reviewed: Jun 1, 2020)                        | criteria provided, single submitter            | VCV000529706 | 7                | 120741580      | 529706      | 522090      | rs957617040  | Neutral    | 0.704    | 0.189        | 0.107    |
| KCND2 | 471 | G   | R   | NM_012281.3(KCND2):c.1411G>C (p.Gly471Arg) | Early myoclonic encephalopathy                                                                                | Uncertain significance(Last reviewed: Jan 28, 2020)                       | criteria provided, single submitter            | VCV000640257 | 7                | 120742546      | 640257      | 635573      | rs757922549  | Neutral    | 0.716    | 0.177        | 0.107    |
| KCND2 | 472 | S   | F   | NM_012281.3(KCND2):c.1415C>T (p.Ser472Phe) | Early myoclonic encephalopathy                                                                                | Likely benign(Last reviewed: Nov 21, 2020)                                | criteria provided, single submitter            | VCV000767427 | 7                | 120742550      | 767427      | 699780      | rs146058924  | Neutral    | 0.719    | 0.178        | 0.103    |
| KCND2 | 473 | S   | T   | NM_012281.3(KCND2):c.1418G>C (p.Ser473Thr) | Early myoclonic encephalopathy                                                                                | Likely benign(Last reviewed: Feb 24, 2020)                                | criteria provided, single submitter            | VCV000857319 | 7                | 120742553      | 857319      | 832905      | rs140087318  | Neutral    | 0.698    | 0.195        | 0.107    |
| KCND2 | 504 | M   | V   | NM_012281.3(KCND2):c.1510A>G (p.Met504Val) | Early myoclonic encephalopathy                                                                                | Uncertain significance(Last reviewed: Jan 27, 2019)                       | criteria provided, single submitter            | VCV000836847 | 7                | 120745822      | 836847      | 832906      | rs1792998586 | Neutral    | 0.537    | 0.286        | 0.177    |
| KCND2 | 511 | R   | H   | NM_012281.3(KCND2):c.1532G>A (p.Arg511His) | Early myoclonic encephalopathy                                                                                | Uncertain significance(Last reviewed: Jan 26, 2020)                       | criteria provided, single submitter            | VCV000998545 | 7                | 120745844      | 998545      | 991983      | rs35460901   | Neutral    | 0.708    | 0.186        | 0.106    |
| KCND2 | 512 | P   | S   | NM_012281.3(KCND2):c.1534C>T (p.Pro512Ser) | Early myoclonic encephalopathy                                                                                | Uncertain significance(Last reviewed: Apr 13, 2018)                       | criteria provided, single submitter            | VCV000568350 | 7                | 120745846      | 568350      | 566337      | rs372198586  | Neutral    | 0.698    | 0.199        | 0.104    |
| KCND2 | 521 | S   | L   | NM_012281.3(KCND2):c.1562C>T (p.Ser521Leu) | Early myoclonic encephalopathy                                                                                | Uncertain significance(Last reviewed: Oct 7, 2019)                        | criteria provided, single submitter            | VCV000936111 | 7                | 120745874      | 936111      | 933612      | rs1792999457 | Neutral    | 0.713    | 0.185        | 0.103    |
| KCND2 | 533 | R   | Q   | NM_012281.3(KCND2):c.1598G>A (p.Arg533Gln) | Early myoclonic encephalopathy                                                                                | Likely benign(Last reviewed: Jun 13, 2020)                                | criteria provided, single submitter            | VCV000574695 | 7                | 120745910      | 574695      | 566340      | rs367713278  | Neutral    | 0.719    | 0.178        | 0.102    |
| KCND2 | 539 | R   | H   | NM_012281.3(KCND2):c.1616G>A (p.Arg539His) | Early myoclonic encephalopathy                                                                                | Uncertain significance(Last reviewed: Jul 29, 2020)                       | criteria provided, single submitter            | VCV000529715 | 7                | 120745928      | 529715      | 522091      | rs376772376  | Neutral    | 0.718    | 0.181        | 0.101    |
| KCND2 | 543 | A   | V   | NM_012281.3(KCND2):c.1628C>T (p.Ala543Val) | Early myoclonic encephalopathy                                                                                | Uncertain significance(Last reviewed: Jun 26, 2018)                       | criteria provided, single submitter            | VCV000568878 | 7                | 120745940      | 568878      | 561319      | rs1168875214 | Neutral    | 0.714    | 0.186        | 0.101    |
| KCND3 | 2   | A   | E   | NM_001378969.1(KCND3):c.5C>A (p.Ala2Glu)   | Spinocerebellar ataxia type 19/22 Cardiovascular phenotype not specified not provided Inborn genetic diseases | Conflicting interpretations of pathogenicity(Last reviewed: Nov 20, 2020) | criteria provided, conflicting interpretations | VCV000372391 | 1                | 111982722      | 372391      | 359196      | rs201340369  | LOF        | 0.854    | 0.044        | 0.102    |
| KCND3 | 13  | R   | Q   | NM_001378969.1(KCND3):c.38G>A (p.Arg13Gln) | Cardiovascular phenotype                                                                                      | Uncertain significance(Last reviewed: Dec 12, 2017)                       | criteria provided, single submitter            | VCV000518761 | 1                | 111982689      | 518761      | 509074      | rs1339082402 | LOF        | 0.863    | 0.04         | 0.097    |
| KCND3 | 15  | A   | V   | NM_001378969.1(KCND3):c.44C>T              | not provided                                                                                                  | Uncertain                                                                 | criteria                                       | VCV000586067 | 1                | 111982683      | 586067      | 576402      | rs866544148  | LOF        | 0.839    | 0.051        | 0.109    |

| gene  | pos | aa1 | aa2 | Name                                         | Condition(s)                                    | Clinical significance (Last reviewed)               | Review status                                        | Accession    | GRCh38Chromosome | GRCh38Location | VariationID | AlleleID(s) | dbSNP ID     | prediction | prob.LOF | prob.Neutral | prob.GOF |
|-------|-----|-----|-----|----------------------------------------------|-------------------------------------------------|-----------------------------------------------------|------------------------------------------------------|--------------|------------------|----------------|-------------|-------------|--------------|------------|----------|--------------|----------|
|       |     |     |     | (p.Ala15Val)                                 |                                                 | significance(Last reviewed: Nov 13, 2017)           | provided, single submitter                           |              |                  |                |             |             |              |            |          |              |          |
| KCND3 | 28  | P   | T   | NM_001378969.1(KCND3):c.82C>A (p.Pro28Thr)   | Spinocerebellar ataxia type 19/22               | Uncertain significance(Last reviewed: Jan 31, 2020) | criteria provided, single submitter                  | VCV001017799 | 1                | 111982645      | 1017799     | 1002043     | rs1675024873 | LOF        | 0.71     | 0.117        | 0.173    |
| KCND3 | 30  | A   | D   | NM_001378969.1(KCND3):c.89C>A (p.Ala30Asp)   | Spinocerebellar ataxia type 19/22               | Uncertain significance(Last reviewed: May 5, 2020)  | criteria provided, single submitter                  | VCV000465169 | 1                | 111982638      | 465169      | 447055      | rs1307934269 | LOF        | 0.661    | 0.144        | 0.195    |
| KCND3 | 31  | P   | S   | NM_001378969.1(KCND3):c.91C>T (p.Pro31Ser)   | Spinocerebellar ataxia type 19/22(not provided) | Uncertain significance(Last reviewed: Feb 24, 2020) | criteria provided, multiple submitters, no conflicts | VCV000452259 | 1                | 111982636      | 452259      | 442581      | rs1403997481 | LOF        | 0.704    | 0.12         | 0.175    |
| KCND3 | 37  | R   | Q   | NM_001378969.1(KCND3):c.110G>A (p.Arg37Gln)  | not provided                                    | Uncertain significance(Last reviewed: May 28, 2019) | criteria provided, single submitter                  | VCV001316993 | 1                | 111982617      | 1316993     | 1306811     | NA           | Neutral    | 0.626    | 0.148        | 0.226    |
| KCND3 | 86  | R   | G   | NM_001378969.1(KCND3):c.256C>G (p.Arg86Gly)  | Spinocerebellar ataxia type 19/22               | Uncertain significance(Last reviewed: Oct 17, 2019) | criteria provided, single submitter                  | VCV000967961 | 1                | 111982471      | 967961      | 952015      | rs754042199  | LOF        | 0.786    | 0.085        | 0.129    |
| KCND3 | 86  | R   | Q   | NM_001378969.1(KCND3):c.257G>A (p.Arg86Gln)  | Spinocerebellar ataxia type 19/22               | Uncertain significance(Last reviewed: Jun 11, 2019) | criteria provided, single submitter                  | VCV000689484 | 1                | 111982470      | 689484      | 677121      | rs1571941606 | LOF        | 0.775    | 0.08         | 0.146    |
| KCND3 | 116 | D   | N   | NM_001378969.1(KCND3):c.346G>A (p.Asp116Asn) | Spinocerebellar ataxia type 19/22               | Uncertain significance(Last reviewed: Oct 23, 2019) | criteria provided, single submitter                  | VCV000961544 | 1                | 111982381      | 961544      | 941383      | rs766584545  | LOF        | 0.832    | 0.088        | 0.08     |
| KCND3 | 119 | A   | D   | NM_001378969.1(KCND3):c.356C>A (p.Ala119Asp) | not provided                                    | Uncertain significance(Last reviewed: Jun 7, 2021)  | criteria provided, single submitter                  | VCV001256140 | 1                | 111982371      | 1256140     | 1246070     | NA           | LOF        | 0.884    | 0.027        | 0.088    |
| KCND3 | 129 | G   | A   | NM_001378969.1(KCND3):c.386G>C (p.Gly129Ala) | Spinocerebellar ataxia type 19/22               | Uncertain significance(Last reviewed: Sep 20, 2019) | criteria provided, single submitter                  | VCV000940586 | 1                | 111982341      | 940586      | 929964      | rs1675001550 | LOF        | 0.842    | 0.043        | 0.115    |
| KCND3 | 133 | Y   | H   | NM_001378969.1(KCND3):c.397T>C (p.Tyr133His) | not specified                                   | Uncertain significance(Last reviewed: Dec 20, 2016) | criteria provided, single submitter                  | VCV000447627 | 1                | 111982330      | 447627      | 440345      | rs1553187539 | LOF        | 0.855    | 0.044        | 0.101    |
| KCND3 | 136 | Y   | C   | NM_001378969.1(KCND3):c.407A>G (p.Tyr136Cys) | not provided                                    | Uncertain significance(Last reviewed: Nov 26, 2019) | criteria provided, single submitter                  | VCV000995134 | 1                | 111982320      | 995134      | 982355      | rs1675000214 | LOF        | 0.872    | 0.044        | 0.084    |
| KCND3 | 144 | A   | T   | NM_001378969.1(KCND3):c.430G>A (p.Ala144Thr) | not provided                                    | Uncertain significance(Last reviewed: May 7, 2019)  | criteria provided, single submitter                  | VCV000804955 | 1                | 111982297      | 804955      | 792825      | rs143933558  | LOF        | 0.734    | 0.097        | 0.169    |
| KCND3 | 145 | E   | K   | NM_001378969.1(KCND3):c.433G>A (p.Glu145Lys) | not provided                                    | Uncertain significance(Last reviewed: Aug 22, 2018) | criteria provided, single submitter                  | VCV000586066 | 1                | 111982294      | 586066      | 576400      | rs1557768261 | LOF        | 0.741    | 0.083        | 0.176    |
| KCND3 | 149 | D   | G   | NM_001378969.1(KCND3):c.446A>G (p.Asp149Gly) | not specified/Spinocerebellar ataxia type 19/22 | Uncertain significance(Last reviewed: Jun 5, 2020)  | criteria provided, multiple submitters, no conflicts | VCV000447628 | 1                | 111982281      | 447628      | 440344      | rs1217571134 | Neutral    | 0.657    | 0.16         | 0.183    |



| gene  | pos | aa1 | aa2 | Name                                         | Condition(s)                                                                          | Clinical significance (Last reviewed)                                     | Review status                                  | Accession    | GRCh38Chromosome | GRCh38Location | VariationID | AlleleID(s) | dbSNP ID     | prediction | prob.LOF | prob.Neutral | prob.GOF |
|-------|-----|-----|-----|----------------------------------------------|---------------------------------------------------------------------------------------|---------------------------------------------------------------------------|------------------------------------------------|--------------|------------------|----------------|-------------|-------------|--------------|------------|----------|--------------|----------|
| KCND3 | 150 | D   | N   | NM_001378969.1(KCND3):c.448G>A (p.Asp150Asn) | Spinocerebellar ataxia type 19/22                                                     | Uncertain significance(Last reviewed: Mar 4, 2019)                        | criteria provided, single submitter            | VCV000838739 | 1                | 111982279      | 838739      | 822538      | rs1488410733 | LOF        | 0.785    | 0.12         | 0.095    |
| KCND3 | 166 | R   | C   | NM_001378969.1(KCND3):c.496C>T (p.Arg166Cys) | not provided                                                                          | Uncertain significance(Last reviewed: Dec 18, 2019)                       | criteria provided, single submitter            | VCV001315984 | 1                | 111982231      | 1315984     | 1306242     | NA           | LOF        | 0.878    | 0.038        | 0.084    |
| KCND3 | 172 | A   | T   | NM_001378969.1(KCND3):c.514G>A (p.Ala172Thr) | Cardiovascular phenotype                                                              | Uncertain significance(Last reviewed: May 16, 2017)                       | criteria provided, single submitter            | VCV000519447 | 1                | 111982213      | 519447      | 509071      | rs149488365  | LOF        | 0.88     | 0.031        | 0.089    |
| KCND3 | 185 | F   | L   | NM_001378969.1(KCND3):c.553T>C (p.Phe185Leu) | not provided                                                                          | Uncertain significance(Last reviewed: Feb 9, 2018)                        | criteria provided, single submitter            | VCV000586068 | 1                | 111982174      | 586068      | 576399      | rs1219355757 | LOF        | 0.835    | 0.058        | 0.106    |
| KCND3 | 204 | T   | M   | NM_001378969.1(KCND3):c.611C>T (p.Thr204Met) | Spinocerebellar ataxia type 19/22                                                     | Likely pathogenic(Last reviewed: Jul 12, 2021)                            | criteria provided, single submitter            | VCV001027415 | 1                | 111982116      | 1027415     | 1015157     | NA           | LOF        | 0.869    | 0.029        | 0.103    |
| KCND3 | 209 | T   | M   | NM_001378969.1(KCND3):c.626C>T (p.Thr209Met) | Cardiovascular phenotype                                                              | Uncertain significance(Last reviewed: Jan 20, 2017)                       | criteria provided, single submitter            | VCV000519385 | 1                | 111982101      | 519385      | 509070      | rs771878661  | LOF        | 0.739    | 0.102        | 0.159    |
| KCND3 | 214 | K   | R   | NM_001378969.1(KCND3):c.641A>G (p.Lys214Arg) | not specified not provided Cardiovascular phenotype Spinocerebellar ataxia type 19/22 | Conflicting interpretations of pathogenicity(Last reviewed: Jun 17, 2021) | criteria provided, conflicting interpretations | VCV000222665 | 1                | 111982086      | 222665      | 224176      | rs142744204  | LOF        | 0.735    | 0.098        | 0.167    |
| KCND3 | 223 | S   | P   | NM_001378969.1(KCND3):c.667T>C (p.Ser223Pro) | not specified                                                                         | Uncertain significance(Last reviewed: Sep 30, 2016)                       | criteria provided, single submitter            | VCV000447629 | 1                | 111982060      | 447629      | 440343      | rs778053540  | LOF        | 0.859    | 0.054        | 0.086    |
| KCND3 | 258 | V   | I   | NM_001378969.1(KCND3):c.772G>A (p.Val258Ile) | not provided                                                                          | Uncertain significance(Last reviewed: Oct 18, 2019)                       | criteria provided, single submitter            | VCV001316355 | 1                | 111981955      | 1316355     | 1308757     | NA           | LOF        | 0.878    | 0.042        | 0.079    |
| KCND3 | 262 | I   | S   | NM_001378969.1(KCND3):c.785T>G (p.Ile262Ser) | not provided                                                                          | Uncertain significance(Last reviewed: Jan 14, 2021)                       | criteria provided, single submitter            | VCV001317441 | 1                | 111981942      | 1317441     | 1306385     | NA           | LOF        | 0.896    | 0.029        | 0.075    |
| KCND3 | 269 | P   | R   | NM_001378969.1(KCND3):c.806C>G (p.Pro269Arg) | Spinocerebellar ataxia type 19/22                                                     | Uncertain significance(Last reviewed: Jan 12, 2021)                       | criteria provided, single submitter            | VCV001333928 | 1                | 111981921      | 1333928     | 1324698     | NA           | LOF        | 0.905    | 0.023        | 0.072    |
| KCND3 | 273 | G   | S   | NM_001378969.1(KCND3):c.817G>A (p.Gly273Ser) | Brugada syndrome                                                                      | Uncertain significance(Last reviewed: Sep 14, 2015)                       | criteria provided, single submitter            | VCV000222666 | 1                | 111981910      | 222666      | 224175      | rs869025444  | LOF        | 0.889    | 0.029        | 0.082    |
| KCND3 | 280 | E   | K   | NM_001378969.1(KCND3):c.838G>A (p.Glu280Lys) | not provided                                                                          | Uncertain significance(Last reviewed: Jul 19, 2019)                       | criteria provided, single submitter            | VCV001316178 | 1                | 111981889      | 1316178     | 1308580     | NA           | LOF        | 0.841    | 0.046        | 0.114    |
| KCND3 | 290 | R   | Q   | NM_001378969.1(KCND3):c.869G>A (p.Arg290Gln) | Spinocerebellar ataxia type 19/22                                                     | Likely pathogenic(Last reviewed: Mar 2, 2018)                             | criteria provided, single submitter            | VCV000976123 | 1                | 111981858      | 976123      | 964123      | rs1674966041 | LOF        | 0.901    | 0.016        | 0.083    |
| KCND3 | 290 | R   | W   | NM_001378969.1(KCND3):c.868C>T (p.Arg290Trp) | KCND3-Related Disorder                                                                | not provided                                                              | no assertion provided                          | VCV001339841 | 1                | 111981859      | 1339841     | 1331051     | NA           | LOF        | 0.895    | 0.021        | 0.084    |
| KCND3 | 293 | R   | H   | NM_001378969.1(KCND3):c.878G>A (p.Arg293His) | Spinocerebellar ataxia type 19/22                                                     | Uncertain significance(Last reviewed: Mar 2, 2018)                        | criteria provided, single submitter            | VCV001038793 | 1                | 111981849      | 1038793     | 1022544     | rs1674965278 | LOF        | 0.84     | 0.089        | 0.071    |

| gene  | pos | aa1 | aa2 | Name                                          | Condition(s)                                   | Clinical significance (Last reviewed)               | Review status                       | Accession    | GRCh38Chromosome | GRCh38Location | VariationID | AlleleID(s) | dbSNP ID     | prediction | prob.LOF | prob.Neutral | prob.GOF |
|-------|-----|-----|-----|-----------------------------------------------|------------------------------------------------|-----------------------------------------------------|-------------------------------------|--------------|------------------|----------------|-------------|-------------|--------------|------------|----------|--------------|----------|
|       |     |     |     |                                               |                                                | reviewed: Aug 3, 2020)                              | submitter                           |              |                  |                |             |             |              |            |          |              |          |
| KCND3 | 304 | S   | P   | NM_001378969.1(KCND3):c.910T>C (p.Ser304Pro)  | not provided                                   | Likely pathogenic(Last reviewed: Oct 23, 2020)      | criteria provided, single submitter | VCV000987028 | 1                | 111981817      | 987028      | 974945      | rs1674962966 | LOF        | 0.882    | 0.027        | 0.09     |
| KCND3 | 313 | T   | A   | NM_001378969.1(KCND3):c.937A>G (p.Thr313Ala)  | not specified                                  | Uncertain significance(Last reviewed: Jun 21, 2017) | criteria provided, single submitter | VCV000447630 | 1                | 111981790      | 447630      | 440342      | rs1553187267 | LOF        | 0.903    | 0.021        | 0.076    |
| KCND3 | 317 | C   | Y   | NM_001378969.1(KCND3):c.950G>A (p.Cys317Tyr)  | Spinocerebellar ataxia type 19/22              | Pathogenic(Last reviewed: Apr 20, 2019)             | criteria provided, single submitter | VCV000626316 | 1                | 111981777      | 626316      | 614651      | rs1571939905 | LOF        | 0.875    | 0.025        | 0.1      |
| KCND3 | 328 | L   | R   | NM_001378969.1(KCND3):c.983T>G (p.Leu328Arg)  | not provided                                   | Uncertain significance(Last reviewed: Apr 12, 2019) | criteria provided, single submitter | VCV001315586 | 1                | 111981744      | 1315586     | 1305846     | NA           | LOF        | 0.911    | 0.023        | 0.066    |
| KCND3 | 338 | V   | E   | NM_001378969.1(KCND3):c.1013T>A (p.Val338Glu) | Spinocerebellar ataxia type 19/22              | Pathogenic(Last reviewed: Apr 20, 2019)             | criteria provided, single submitter | VCV000626317 | 1                | 111981714      | 626317      | 614650      | rs1571939827 | LOF        | 0.857    | 0.046        | 0.097    |
| KCND3 | 343 | E   | K   | NM_001378969.1(KCND3):c.1027G>A (p.Glu343Lys) | not provided                                   | Uncertain significance(Last reviewed: Jan 16, 2018) | criteria provided, single submitter | VCV000586062 | 1                | 111981700      | 586062      | 576394      | rs1557767012 | LOF        | 0.918    | 0.019        | 0.063    |
| KCND3 | 345 | G   | V   | NM_001378969.1(KCND3):c.1034G>T (p.Gly345Val) | Spinocerebellar ataxia type 19/22              | Pathogenic(Last reviewed: Jun 27, 2014)             | criteria provided, single submitter | VCV000211216 | 1                | 111981693      | 211216      | 206701      | rs797045634  | LOF        | 0.871    | 0.029        | 0.1      |
| KCND3 | 350 | K   | N   | NM_001378969.1(KCND3):c.1050G>T (p.Lys350Asn) | not provided                                   | Uncertain significance(Last reviewed: Sep 1, 2021)  | criteria provided, single submitter | VCV001298437 | 1                | 111981677      | 1298437     | 1288299     | NA           | LOF        | 0.738    | 0.089        | 0.172    |
| KCND3 | 351 | F   | L   | NM_001378969.1(KCND3):c.1051T>C (p.Phe351Leu) | not provided                                   | Likely pathogenic(Last reviewed: May 3, 2016)       | criteria provided, single submitter | VCV000421079 | 1                | 111981676      | 421079      | 404882      | rs1064794895 | LOF        | 0.77     | 0.076        | 0.154    |
| KCND3 | 352 | T   | A   | NM_001378969.1(KCND3):c.1054A>G (p.Thr352Ala) | not specified                                  | Uncertain significance(Last reviewed: Dec 20, 2016) | criteria provided, single submitter | VCV000447625 | 1                | 111981673      | 447625      | 440341      | rs397515476  | LOF        | 0.867    | 0.043        | 0.09     |
| KCND3 | 352 | T   | P   | NM_001378969.1(KCND3):c.1054A>C (p.Thr352Pro) | not provided Spinocerebellar ataxia type 19/22 | Pathogenic(Last reviewed: Oct 23, 2020)             | criteria provided, single submitter | VCV000066062 | 1                | 111981673      | 66062       | 76966       | rs397515476  | LOF        | 0.858    | 0.044        | 0.098    |
| KCND3 | 354 | I   | V   | NM_001378969.1(KCND3):c.1060A>G (p.Ile354Val) | not provided                                   | Uncertain significance(Last reviewed: Sep 1, 2021)  | criteria provided, single submitter | VCV001298436 | 1                | 111981667      | 1298436     | 1288298     | NA           | LOF        | 0.87     | 0.071        | 0.06     |
| KCND3 | 355 | P   | S   | NM_001378969.1(KCND3):c.1063C>T (p.Pro355Ser) | Spinocerebellar ataxia type 19/22              | Uncertain significance(Last reviewed: Nov 3, 2021)  | criteria provided, single submitter | VCV001319064 | 1                | 111981664      | 1319064     | 1309317     | NA           | LOF        | 0.864    | 0.065        | 0.071    |
| KCND3 | 357 | S   | L   | NM_001378969.1(KCND3):c.1070C>T (p.Ser357Leu) | Spinocerebellar ataxia type 19/22              | Likely pathogenic(Last reviewed: May 15, 2019)      | criteria provided, single submitter | VCV000827788 | 1                | 111981657      | 827788      | 815974      | rs867628133  | LOF        | 0.852    | 0.074        | 0.074    |
| KCND3 | 357 | S   | P   | NM_001378969.1(KCND3):c.1069T>C (p.Ser357Pro) | not provided                                   | Uncertain significance(Last reviewed: Sep 10, 2019) | criteria provided, single submitter | VCV001316217 | 1                | 111981658      | 1316217     | 1308619     | NA           | LOF        | 0.864    | 0.064        | 0.072    |
| KCND3 | 357 | S   | W   | NM_001378969.1(KCND3):c.1070C>G (p.Ser357Trp) | Spinocerebellar ataxia type 19/22              | Uncertain significance(Last reviewed: Sep 10, 2019) | criteria provided, single submitter | VCV001004161 | 1                | 111981657      | 1004161     | 986820      | rs867628133  | LOF        | 0.849    | 0.076        | 0.075    |

| gene  | pos | aa1 | aa2 | Name                                          | Condition(s)                                                            | Clinical significance (Last reviewed)                                     | Review status                                        | Accession    | GRCh38Chromosome | GRCh38Location | VariationID | AlleleID(s) | dbSNP ID     | prediction | prob.LOF | prob.Neutral | prob.GOF |
|-------|-----|-----|-----|-----------------------------------------------|-------------------------------------------------------------------------|---------------------------------------------------------------------------|------------------------------------------------------|--------------|------------------|----------------|-------------|-------------|--------------|------------|----------|--------------|----------|
|       |     |     |     |                                               |                                                                         | reviewed: Oct 20, 2020)                                                   | submitter                                            |              |                  |                |             |             |              |            |          |              |          |
| KCND3 | 359 | W   | L   | NM_001378969.1(KCND3):c.1076G>T (p.Trp359Leu) | SeizuresIntellectual disability                                         | Likely pathogenic                                                         | criteria provided, single submitter                  | VCV000816626 | 1                | 111981651      | 816626      | 804831      | rs1571939623 | LOF        | 0.865    | 0.06         | 0.075    |
| KCND3 | 368 | L   | M   | NM_001378969.1(KCND3):c.1102C>A (p.Leu368Met) | not provided                                                            | Uncertain significance(Last reviewed: Jul 1, 2021)                        | criteria provided, single submitter                  | VCV001298435 | 1                | 111981625      | 1298435     | 1288297     | NA           | LOF        | 0.907    | 0.031        | 0.062    |
| KCND3 | 371 | G   | R   | NM_001378969.1(KCND3):c.1111G>A (p.Gly371Arg) | not providedSpinocerebellar ataxia type 19/22                           | Pathogenic/Likely pathogenic(Last reviewed: Feb 3, 2021)                  | criteria provided, multiple submitters, no conflicts | VCV000383943 | 1                | 111787102      | 383943      | 364367      | rs1057521793 | LOF        | 0.859    | 0.043        | 0.098    |
| KCND3 | 373 | M   | I   | NM_001378969.1(KCND3):c.1119G>A (p.Met373Ile) | Variation of unknown significance                                       | Uncertain significance(Last reviewed: Dec 1, 2012)                        | no assertion criteria provided                       | VCV000066063 | 1                | 111787094      | 66063       | 76967       | rs397515477  | LOF        | 0.892    | 0.027        | 0.081    |
| KCND3 | 375 | P   | L   | NM_001378969.1(KCND3):c.1124C>T (p.Pro375Leu) | Inborn genetic diseases                                                 | Uncertain significance(Last reviewed: Dec 28, 2017)                       | criteria provided, single submitter                  | VCV000985855 | 1                | 111787089      | 985855      | 973124      | rs1664633885 | LOF        | 0.821    | 0.058        | 0.121    |
| KCND3 | 375 | P   | S   | NM_001378969.1(KCND3):c.1123C>T (p.Pro375Ser) | Spinocerebellar ataxia type 19/22                                       | Pathogenic(Last reviewed: Apr 20, 2019)                                   | criteria provided, single submitter                  | VCV000626318 | 1                | 111787090      | 626318      | 614649      | rs1571636508 | LOF        | 0.838    | 0.042        | 0.12     |
| KCND3 | 377 | T   | M   | NM_001378969.1(KCND3):c.1130C>T (p.Thr377Met) | not providedSpinocerebellar ataxia type 19/22                           | Pathogenic(Last reviewed: Oct 23, 2020)                                   | criteria provided, multiple submitters, no conflicts | VCV000626319 | 1                | 111787083      | 626319      | 614648      | rs1571636501 | LOF        | 0.855    | 0.049        | 0.095    |
| KCND3 | 384 | G   | S   | NM_001378969.1(KCND3):c.1150G>A (p.Gly384Ser) | not provided                                                            | Likely pathogenic(Last reviewed: Dec 11, 2019)                            | criteria provided, single submitter                  | VCV000995131 | 1                | 111787063      | 995131      | 982353      | rs1664632655 | LOF        | 0.861    | 0.045        | 0.095    |
| KCND3 | 385 | S   | P   | NM_001378969.1(KCND3):c.1153T>C (p.Ser385Pro) | Spinocerebellar ataxia type 19/22                                       | Pathogenic                                                                | no assertion criteria provided                       | VCV000375399 | 1                | 111787060      | 375399      | 362133      | rs1057519453 | LOF        | 0.872    | 0.053        | 0.075    |
| KCND3 | 390 | S   | N   | NM_001378969.1(KCND3):c.1169G>A (p.Ser390Asn) | Variation of unknown significance                                       | Uncertain significance(Last reviewed: Dec 1, 2012)                        | no assertion criteria provided                       | VCV000066064 | 1                | 111787044      | 66064       | 76968       | rs397515478  | LOF        | 0.905    | 0.017        | 0.079    |
| KCND3 | 392 | V   | I   | NM_001378969.1(KCND3):c.1174G>A (p.Val392Ile) | Spinocerebellar ataxia type 19/22Brugada syndrome 9 not provided        | Conflicting interpretations of pathogenicity(Last reviewed: Nov 23, 2021) | criteria provided, conflicting interpretations       | VCV000192255 | 1                | 111787039      | 192255      | 190052      | rs786205867  | LOF        | 0.864    | 0.045        | 0.09     |
| KCND3 | 399 | V   | L   | NM_001378969.1(KCND3):c.1195G>C (p.Val399Leu) | not provided                                                            | Likely pathogenic(Last reviewed: Dec 17, 2015)                            | criteria provided, single submitter                  | VCV000372829 | 1                | 111787018      | 372829      | 359195      | rs1057518007 | LOF        | 0.825    | 0.092        | 0.083    |
| KCND3 | 419 | R   | H   | NM_001378969.1(KCND3):c.1256G>A (p.Arg419His) | not provided                                                            | Uncertain significance(Last reviewed: Mar 7, 2018)                        | criteria provided, single submitter                  | VCV000393083 | 1                | 111786957      | 393083      | 364361      | rs774338559  | LOF        | 0.669    | 0.147        | 0.184    |
| KCND3 | 426 | R   | H   | NM_001378969.1(KCND3):c.1277G>A (p.Arg426His) | not provided                                                            | Uncertain significance(Last reviewed: May 10, 2019)                       | criteria provided, single submitter                  | VCV000804951 | 1                | 111780784      | 804951      | 792824      | rs760274429  | LOF        | 0.681    | 0.132        | 0.187    |
| KCND3 | 431 | R   | H   | NM_001378969.1(KCND3):c.1292G>A (p.Arg431His) | Cardiovascular phenotype Spinocerebellar ataxia type 19/22 not provided | Conflicting interpretations of pathogenicity(Last reviewed: Feb 10, 2021) | criteria provided, conflicting interpretations       | VCV000519484 | 1                | 111780769      | 519484      | 509066      | rs771703569  | GOF        | 0.459    | 0.073        | 0.468    |

| gene  | pos | aa1 | aa2 | Name                                          | Condition(s)                                                                                 | Clinical significance (Last reviewed)                                    | Review status                                        | Accession    | GRCh38Chromosome | GRCh38Location | VariationID | AlleleID(s) | dbSNP ID     | prediction | prob.LOF | prob.Neutral | prob.GOF |
|-------|-----|-----|-----|-----------------------------------------------|----------------------------------------------------------------------------------------------|--------------------------------------------------------------------------|------------------------------------------------------|--------------|------------------|----------------|-------------|-------------|--------------|------------|----------|--------------|----------|
| KCND3 | 438 | S   | L   | NM_001378969.1(KCND3):c.1313C>T (p.Ser438Leu) | Spinocerebellar ataxia type 19/22                                                            | Uncertain significance(Last reviewed: Nov 3, 2021)                       | criteria provided, single submitter                  | VCV001319063 | 1                | 111780748      | 1319063     | 1309316     | NA           | Neutral    | 0.459    | 0.214        | 0.327    |
| KCND3 | 438 | S   | W   | NM_001378969.1(KCND3):c.1313C>G (p.Ser438Trp) | Spinocerebellar ataxia type 19/22                                                            | Uncertain significance(Last reviewed: May 16, 2017)                      | criteria provided, single submitter                  | VCV000465164 | 1                | 111780748      | 465164      | 447138      | rs1172444288 | Neutral    | 0.466    | 0.219        | 0.316    |
| KCND3 | 446 | R   | C   | NM_001378969.1(KCND3):c.1336C>T (p.Arg446Cys) | Spinocerebellar ataxia type 19/22                                                            | Uncertain significance(Last reviewed: Oct 8, 2017)                       | criteria provided, single submitter                  | VCV000533725 | 1                | 111780725      | 533725      | 514985      | rs756087542  | GOF        | 0.546    | 0.132        | 0.322    |
| KCND3 | 447 | N   | D   | NM_001378969.1(KCND3):c.1339A>G (p.Asn447Asp) | Spinocerebellar ataxia type 19/22                                                            | Uncertain significance(Last reviewed: Jul 13, 2018)                      | criteria provided, single submitter                  | VCV000663733 | 1                | 111780722      | 663733      | 626612      | rs1571626928 | GOF        | 0.509    | 0.159        | 0.332    |
| KCND3 | 450 | L   | F   | NM_001378969.1(KCND3):c.1348C>T (p.Leu450Phe) | Cardiovascular phenotype Brugada syndrome 9  Spinocerebellar ataxia type 19/22 not provided  | Conflicting interpretations of pathogenicity(Last reviewed: Dec 1, 2021) | criteria provided, conflicting interpretations       | VCV000192253 | 1                | 111780713      | 192253      | 190050      | rs150401343  | GOF        | 0.444    | 0.092        | 0.464    |
| KCND3 | 452 | E   | K   | NM_001378969.1(KCND3):c.1354G>A (p.Glu452Lys) | not provided Primary dilated cardiomyopathy  not specified Spinocerebellar ataxia type 19/22 | Benign/Likely benign(Last reviewed: May 20, 2020)                        | criteria provided, multiple submitters, no conflicts | VCV000447626 | 1                | 111780707      | 447626      | 440340      | rs200532657  | GOF        | 0.478    | 0.185        | 0.338    |
| KCND3 | 457 | T   | M   | NM_001378969.1(KCND3):c.1370C>T (p.Thr457Met) | Brugada syndrome 9 not provided                                                              | Uncertain significance(Last reviewed: Apr 20, 2018)                      | criteria provided, single submitter                  | VCV000432538 | 1                | 111780691      | 432538      | 425302      | rs199637120  | Neutral    | 0.376    | 0.318        | 0.306    |
| KCND3 | 463 | E   | K   | NM_001378969.1(KCND3):c.1387G>A (p.Glu463Lys) | Spinocerebellar ataxia type 19/22                                                            | Uncertain significance(Last reviewed: Sep 19, 2019)                      | criteria provided, single submitter                  | VCV000958292 | 1                | 111780299      | 958292      | 941382      | rs1571626257 | Neutral    | 0.446    | 0.324        | 0.23     |
| KCND3 | 471 | L   | F   | NM_001378969.1(KCND3):c.1411C>T (p.Leu471Phe) | not provided                                                                                 | Uncertain significance(Last reviewed: Oct 11, 2018)                      | criteria provided, multiple submitters, no conflicts | VCV000423997 | 1                | 111780275      | 423997      | 404881      | rs1064796735 | LOF        | 0.643    | 0.139        | 0.219    |
| KCND3 | 476 | H   | R   | NM_001378969.1(KCND3):c.1427A>G (p.His476Arg) | not provided Spinocerebellar ataxia type 19/22                                               | Uncertain significance(Last reviewed: Jul 15, 2020)                      | criteria provided, multiple submitters, no conflicts | VCV000804952 | 1                | 111780259      | 804952      | 792823      | rs1571626155 | LOF        | 0.742    | 0.065        | 0.194    |
| KCND3 | 486 | T   | A   | NM_001378969.1(KCND3):c.1456A>G (p.Thr486Ala) | not specified not provided Spinocerebellar ataxia type 19/22                                 | Conflicting interpretations of pathogenicity(Last reviewed: Dec 3, 2020) | criteria provided, conflicting interpretations       | VCV000415286 | 1                | 111780230      | 415286      | 390769      | rs149008060  | LOF        | 0.721    | 0.095        | 0.184    |
| KCND3 | 493 | V   | G   | NM_001378969.1(KCND3):c.1478T>G (p.Val493Gly) | Spinocerebellar ataxia type 19/22                                                            | Uncertain significance(Last reviewed: Sep 29, 2020)                      | criteria provided, single submitter                  | VCV001041440 | 1                | 111778476      | 1041440     | 1022543     | rs1216457569 | Neutral    | 0.68     | 0.147        | 0.173    |
| KCND3 | 499 | S   | C   | NM_001378969.1(KCND3):c.1496C>G (p.Ser499Cys) | Spinocerebellar ataxia type 19/22                                                            | Uncertain significance(Last reviewed: Jun 7, 2019)                       | criteria provided, single submitter                  | VCV000570216 | 1                | 111778458      | 570216      | 556978      | rs976664434  | LOF        | 0.635    | 0.156        | 0.209    |
| KCND3 | 501 | R   | Q   | NM_001378969.1(KCND3):c.1502G>A (p.Arg501Gln) | Spinocerebellar ataxia type 19/22                                                            | Uncertain significance(Last reviewed: Dec 31, 2019)                      | criteria provided, single submitter                  | VCV000837098 | 1                | 111778452      | 837098      | 822537      | rs764928165  | Neutral    | 0.602    | 0.176        | 0.222    |
| KCND3 | 515 | M   | L   | NM_001378969.1(KCND3):c.1543A>C               | Cardiovascular phenotype                                                                     | Uncertain                                                                | criteria                                             | VCV000519397 | 1                | 111777249      | 519397      | 509064      | rs369907159  | LOF        | 0.663    | 0.132        | 0.205    |

| gene  | pos | aa1 | aa2 | Name                                          | Condition(s)                                                                                | Clinical significance (Last reviewed)                                     | Review status                                        | Accession    | GRCh38Chromosome | GRCh38Location | VariationID | AlleleID(s) | dbSNP ID     | prediction | prob.LOF | prob.Neutral | prob.GOF |
|-------|-----|-----|-----|-----------------------------------------------|---------------------------------------------------------------------------------------------|---------------------------------------------------------------------------|------------------------------------------------------|--------------|------------------|----------------|-------------|-------------|--------------|------------|----------|--------------|----------|
|       |     |     |     | (p.Met515Leu)                                 |                                                                                             | significance(Last reviewed: Feb 8, 2017)                                  | provided, single submitter                           |              |                  |                |             |             |              |            |          |              |          |
| KCND3 | 515 | P   | T   | NM_001378969.1(KCND3):c.1600C>A (p.Pro534Thr) | Spinocerebellar ataxia type 19/22                                                           | Uncertain significance(Last reviewed: Mar 12, 2020)                       | criteria provided, single submitter                  | VCV001014492 | 1                | 111777192      | 1014492     | 1002042     | rs1447493103 | GOF        | 0.598    | 0.117        | 0.285    |
| KCND3 | 517 | E   | Q   | NM_001378969.1(KCND3):c.1549G>C (p.Glu517Gln) | not provided                                                                                | Uncertain significance(Last reviewed: Dec 21, 2018)                       | criteria provided, single submitter                  | VCV000804953 | 1                | 111777243      | 804953      | 792822      | rs202110939  | GOF        | 0.571    | 0.111        | 0.318    |
| KCND3 | 525 | M   | V   | NM_001378969.1(KCND3):c.1573A>G (p.Met525Val) | Cardiovascular phenotype not specified  Spinocerebellar ataxia type 19/22 not provided      | Benign/Likely benign(Last reviewed: Mar 27, 2021)                         | criteria provided, multiple submitters, no conflicts | VCV000519434 | 1                | 111777219      | 519434      | 509063      | rs145890206  | GOF        | 0.461    | 0.2          | 0.339    |
| KCND3 | 526 | T   | I   | NM_001378969.1(KCND3):c.1634C>T (p.Thr545Ile) | Spinocerebellar ataxia type 19/22                                                           | Uncertain significance(Last reviewed: Jul 30, 2020)                       | criteria provided, single submitter                  | VCV001059490 | 1                | 111777158      | 1059490     | 1039359     | NA           | Neutral    | 0.4      | 0.324        | 0.275    |
| KCND3 | 531 | R   | H   | NM_001378969.1(KCND3):c.1649G>A (p.Arg550His) | not provided                                                                                | Uncertain significance(Last reviewed: Sep 4, 2020)                        | criteria provided, single submitter                  | VCV000995132 | 1                | 111777143      | 995132      | 982352      | rs151164490  | Neutral    | 0.446    | 0.209        | 0.345    |
| KCND3 | 534 | P   | L   | NM_001378969.1(KCND3):c.1601C>T (p.Pro534Leu) | Spinocerebellar ataxia type 19/22                                                           | Uncertain significance(Last reviewed: Feb 7, 2020)                        | criteria provided, single submitter                  | VCV000465166 | 1                | 111777191      | 465166      | 446985      | rs1553235768 | Neutral    | 0.476    | 0.243        | 0.281    |
| KCND3 | 547 | R   | H   | NM_001378969.1(KCND3):c.1697G>A (p.Arg566His) | not provided                                                                                | Uncertain significance(Last reviewed: May 20, 2019)                       | criteria provided, single submitter                  | VCV000804954 | 1                | 111777095      | 804954      | 792821      | rs761867267  | GOF        | 0.517    | 0.111        | 0.372    |
| KCND3 | 549 | R   | C   | NM_001378969.1(KCND3):c.1645C>T (p.Arg549Cys) | Cardiovascular phenotype                                                                    | Uncertain significance(Last reviewed: Jun 22, 2017)                       | criteria provided, single submitter                  | VCV000519470 | 1                | 111777147      | 519470      | 509062      | rs1294150954 | Neutral    | 0.57     | 0.149        | 0.281    |
| KCND3 | 549 | R   | H   | NM_001378969.1(KCND3):c.1646G>A (p.Arg549His) | Cardiovascular phenotype Spinocerebellar ataxia type 19/22                                  | Conflicting interpretations of pathogenicity(Last reviewed: Jul 12, 2021) | criteria provided, conflicting interpretations       | VCV000264530 | 1                | 111777146      | 264530      | 257907      | rs35027371   | GOF        | 0.461    | 0.167        | 0.372    |
| KCND3 | 556 | T   | M   | NM_001378969.1(KCND3):c.1724C>T (p.Thr575Met) | not provided                                                                                | Uncertain significance(Last reviewed: Mar 1, 2017)                        | criteria provided, single submitter                  | VCV000806186 | 1                | 111777068      | 806186      | 794371      | rs775768536  | GOF        | 0.412    | 0.191        | 0.396    |
| KCND3 | 568 | R   | H   | NM_001378969.1(KCND3):c.1703G>A (p.Arg568His) | Spinocerebellar ataxia type 19/22 not provided                                              | Uncertain significance(Last reviewed: Nov 12, 2020)                       | criteria provided, multiple submitters, no conflicts | VCV000533722 | 1                | 111777089      | 533722      | 515008      | rs200212002  | GOF        | 0.52     | 0.175        | 0.304    |
| KCND3 | 570 | M   | T   | NM_001378969.1(KCND3):c.1709T>C (p.Met570Thr) | Spinocerebellar ataxia type 19/22                                                           | Uncertain significance(Last reviewed: Jun 23, 2017)                       | criteria provided, single submitter                  | VCV000465167 | 1                | 111777083      | 465167      | 447091      | rs1553235743 | GOF        | 0.473    | 0.176        | 0.351    |
| KCND3 | 576 | L   | W   | NM_001378969.1(KCND3):c.1784T>G (p.Leu595Trp) | Spinocerebellar ataxia type 19/22                                                           | Uncertain significance(Last reviewed: Dec 5, 2018)                        | criteria provided, single submitter                  | VCV000655552 | 1                | 111776261      | 655552      | 626611      | rs1483036958 | LOF        | 0.698    | 0.142        | 0.16     |
| KCND3 | 581 | G   | R   | NM_001378969.1(KCND3):c.1798G>A (p.Gly600Arg) | Cardiovascular phenotype Brugada syndrome 9  Spinocerebellar ataxia type 19/22 not provided | Uncertain significance(Last reviewed: Apr 7, 2021)                        | criteria provided, multiple submitters, no           | VCV000192254 | 1                | 111776247      | 192254      | 190051      | rs149344567  | GOF        | 0.479    | 0.111        | 0.41     |

| gene  | pos | aa1 | aa2 | Name                                          | Condition(s)                                                                   | Clinical significance (Last reviewed)                                     | Review status                                        | Accession    | GRCh38Chromosome | GRCh38Location | VariationID | AlleleID(s) | dbSNP ID     | prediction | prob.LOF | prob.Neutral | prob.GOF |  |
|-------|-----|-----|-----|-----------------------------------------------|--------------------------------------------------------------------------------|---------------------------------------------------------------------------|------------------------------------------------------|--------------|------------------|----------------|-------------|-------------|--------------|------------|----------|--------------|----------|--|
|       |     |     |     |                                               |                                                                                |                                                                           | conflicts                                            |              |                  |                |             |             |              |            |          |              |          |  |
| KCND3 | 581 | S   | C   | NM_001378969.1(KCND3):c.1741A>T (p.Ser581Cys) | Spinocerebellar ataxia type 19/22                                              | Uncertain significance(Last reviewed: Apr 10, 2018)                       | criteria provided, single submitter                  | VCV000577665 | 1                | 111777051      | 577665      | 556840      | rs1420542041 | GOF        | 0.532    | 0.182        | 0.286    |  |
| KCND3 | 586 | L   | V   | NM_001378969.1(KCND3):c.1756C>G (p.Leu586Val) | Brugada syndrome 9 Cardiovascular phenotype  Spinocerebellar ataxia type 19/22 | Uncertain significance(Last reviewed: May 30, 2019)                       | criteria provided, multiple submitters, no conflicts | VCV000519297 | 1                | 111777036      | 519297      | 509061      | rs778053688  | GOF        | 0.477    | 0.19         | 0.333    |  |
| KCND3 | 590 | R   | H   | NM_001378969.1(KCND3):c.1769G>A (p.Arg590His) | Spinocerebellar ataxia type 19/22(not provided)                                | Conflicting interpretations of pathogenicity(Last reviewed: Oct 17, 2019) | criteria provided, conflicting interpretations       | VCV000586063 | 1                | 111776276      | 586063      | 576393      | rs186194682  | Neutral    | 0.468    | 0.197        | 0.335    |  |
| KCND3 | 603 | A   | S   | NM_001378969.1(KCND3):c.1864G>T (p.Ala622Ser) | Spinocerebellar ataxia type 19/22                                              | Uncertain significance(Last reviewed: Jun 7, 2020)                        | criteria provided, single submitter                  | VCV001057886 | 1                | 111776181      | 1057886     | 1039358     | NA           | Neutral    | 0.405    | 0.316        | 0.279    |  |
| KCND3 | 603 | A   | V   | NM_001378969.1(KCND3):c.1865C>T (p.Ala622Val) | Spinocerebellar ataxia type 19/22                                              | Likely benign(Last reviewed: Jun 17, 2020)                                | criteria provided, single submitter                  | VCV001140881 | 1                | 111776180      | 1140881     | 1109308     | NA           | Neutral    | 0.412    | 0.308        | 0.281    |  |
| KCND3 | 608 | G   | R   | NM_001378969.1(KCND3):c.1879G>A (p.Gly627Arg) | Spinocerebellar ataxia type 19/22                                              | Uncertain significance(Last reviewed: Dec 20, 2018)                       | criteria provided, single submitter                  | VCV000647173 | 1                | 111776166      | 647173      | 626610      | rs372362132  | GOF        | 0.524    | 0.108        | 0.368    |  |
| KCND3 | 611 | R   | Q   | NM_001378969.1(KCND3):c.1889G>A (p.Arg630Gln) | Spinocerebellar ataxia type 19/22                                              | Uncertain significance(Last reviewed: Aug 2, 2020)                        | criteria provided, single submitter                  | VCV000934670 | 1                | 111776156      | 934670      | 929963      | rs774713377  | LOF        | 0.818    | 0.106        | 0.077    |  |
| KCND3 | 617 | I   | V   | NM_001378969.1(KCND3):c.1849A>G (p.Ile617Val) | Spinocerebellar ataxia type 19/22                                              | Uncertain significance(Last reviewed: Sep 28, 2017)                       | criteria provided, single submitter                  | VCV000533723 | 1                | 111776196      | 533723      | 515041      | rs948125814  | GOF        | 0.595    | 0.141        | 0.264    |  |
| KCND3 | 629 | N   | S   | NM_001378969.1(KCND3):c.1943A>G (p.Asn648Ser) | Spinocerebellar ataxia type 19/22                                              | Uncertain significance(Last reviewed: Jul 15, 2019)                       | criteria provided, single submitter                  | VCV000954104 | 1                | 111776102      | 954104      | 941381      | rs766562520  | Neutral    | 0.377    | 0.434        | 0.189    |  |
| KCND3 | 630 | V   | A   | NM_001378969.1(KCND3):c.1946T>C (p.Val649Ala) | Spinocerebellar ataxia type 19/22                                              | Uncertain significance(Last reviewed: Dec 31, 2018)                       | criteria provided, single submitter                  | VCV001027158 | 1                | 111776099      | 1027158     | 1002041     | rs760907112  | GOF        | 0.585    | 0.17         | 0.246    |  |
| KCND3 | 635 | A   | T   | NM_001378969.1(KCND3):c.1960G>A (p.Ala654Thr) | Spinocerebellar ataxia type 19/22                                              | Uncertain significance(Last reviewed: Sep 16, 2019)                       | criteria provided, single submitter                  | VCV000934368 | 1                | 111776085      | 934368      | 929962      | rs774711788  | Neutral    | 0.381    | 0.415        | 0.204    |  |
| KCND3 | 639 | N   | K   | NM_001378969.1(KCND3):c.1917C>A (p.Asn639Lys) | Spinocerebellar ataxia type 19/22                                              | Uncertain significance(Last reviewed: Apr 12, 2017)                       | criteria provided, single submitter                  | VCV000465168 | 1                | 111776128      | 465168      | 447051      | rs777172603  | Neutral    | 0.49     | 0.329        | 0.181    |  |
| KCND3 | 642 | I   | F   | NM_001378969.1(KCND3):c.1924A>T (p.Ile642Phe) | Spinocerebellar ataxia type 19/22 Inborn genetic diseases                      | Uncertain significance(Last reviewed: Nov 21, 2017)                       | criteria provided, multiple submitters, no conflicts | VCV000533724 | 1                | 111776121      | 533724      | 514977      | rs754759010  | Neutral    | 0.542    | 0.231        | 0.228    |  |
| KCND3 | 645 | I   | T   | NM_001378969.1(KCND3):c.1934T>C (p.Ile645Thr) | Spinocerebellar ataxia type 19/22                                              | Uncertain significance(Last reviewed: Feb 27, 2018)                       | criteria provided, single submitter                  | VCV000579054 | 1                | 111776111      | 579054      | 556587      | rs1557929628 | Neutral    | 0.563    | 0.211        | 0.226    |  |
| KCNH1 | 3   | M   | I   | NM_172362.3(KCNH1):c.9G>A (p.Met3Ile)         | not provided                                                                   | Uncertain significance(Last reviewed: Feb 27, 2018)                       | criteria provided, single submitter                  | VCV000806343 | 1                | 211133937      | 806343      | 794560      | rs752274336  | GOF        | 0.656    | 0.109        | 0.235    |  |

| gene  | pos | aa1 | aa2 | Name                                       | Condition(s)                         | Clinical significance (Last reviewed)               | Review status                       | Accession    | GRCh38Chromosome | GRCh38Location | VariationID | AlleleID(s) | dbSNP ID     | prediction | prob.LOF | prob.Neutral | prob.GOF |  |
|-------|-----|-----|-----|--------------------------------------------|--------------------------------------|-----------------------------------------------------|-------------------------------------|--------------|------------------|----------------|-------------|-------------|--------------|------------|----------|--------------|----------|--|
|       |     |     |     |                                            |                                      |                                                     |                                     |              |                  |                |             |             |              |            |          |              |          |  |
| KCNH1 | 58  | A   | E   | NM_172362.3(KCNH1):c.173C>A (p.Ala58Glu)   | not provided                         | Uncertain significance(Last reviewed: Jul 1, 2020)  | criteria provided, single submitter | VCV000932653 | 1                | 211107284      | 932653      | 920635      | rs1691367220 | GOF        | 0.615    | 0.055        | 0.33     |  |
| KCNH1 | 82  | K   | R   | NM_172362.3(KCNH1):c.245A>G (p.Lys82Arg)   | Intellectual disability              | Likely benign(Last reviewed: Jan 1, 2019)           | no assertion criteria provided      | VCV000975412 | 1                | 211103561      | 975412      | 963470      | rs1558605689 | GOF        | 0.531    | 0.062        | 0.407    |  |
| KCNH1 | 84  | R   | Q   | NM_172362.3(KCNH1):c.251G>A (p.Arg84Gln)   | not provided                         | Likely benign(Last reviewed: Apr 1, 2020)           | criteria provided, single submitter | VCV001205093 | 1                | 211103555      | 1205093     | 1192762     | NA           | GOF        | 0.556    | 0.053        | 0.391    |  |
| KCNH1 | 95  | F   | C   | NM_172362.3(KCNH1):c.284T>G (p.Phe95Cys)   | not provided                         | Uncertain significance(Last reviewed: Jul 1, 2018)  | criteria provided, single submitter | VCV000806342 | 1                | 211103522      | 806342      | 794559      | rs1571649012 | LOF        | 0.862    | 0.055        | 0.083    |  |
| KCNH1 | 152 | A   | P   | NM_172362.3(KCNH1):c.454G>C (p.Ala152Pro)  | not provided                         | Uncertain significance(Last reviewed: Mar 11, 2019) | criteria provided, single submitter | VCV001307611 | 1                | 211082884      | 1307611     | 1298881     | NA           | GOF        | 0.626    | 0.081        | 0.292    |  |
| KCNH1 | 178 | V   | I   | NM_172362.3(KCNH1):c.532G>A (p.Val178Ile)  | not provided                         | Uncertain significance(Last reviewed: Sep 9, 2019)  | criteria provided, single submitter | VCV001312106 | 1                | 211082806      | 1312106     | 1302637     | NA           | LOF        | 0.601    | 0.137        | 0.262    |  |
| KCNH1 | 182 | S   | T   | NM_172362.3(KCNH1):c.544T>A (p.Ser182Thr)  | Zimmermann-Laband syndrome 1         | Uncertain significance(Last reviewed: Nov 3, 2021)  | criteria provided, single submitter | VCV001319807 | 1                | 211082794      | 1319807     | 1310056     | NA           | GOF        | 0.513    | 0.101        | 0.386    |  |
| KCNH1 | 199 | K   | R   | NM_172362.3(KCNH1):c.596A>G (p.Lys199Arg)  | KCNH1-related phenotype              | Likely pathogenic(Last reviewed: Jun 22, 2018)      | criteria provided, single submitter | VCV000560720 | 1                | 211019219      | 560720      | 551755      | rs1558570102 | GOF        | 0.526    | 0.095        | 0.378    |  |
| KCNH1 | 217 | K   | N   | NM_172362.3(KCNH1):c.651G>C (p.Lys217Asn)  | Temple-Baraitser syndrome            | Pathogenic(Last reviewed: Jan 1, 2015)              | no assertion criteria provided      | VCV000162523 | 1                | 211019164      | 162523      | 172196      | rs727502822  | GOF        | 0.484    | 0.026        | 0.49     |  |
| KCNH1 | 225 | L   | F   | NM_172362.3(KCNH1):c.675G>T (p.Leu225Phe)  | not provided                         | Uncertain significance(Last reviewed: Sep 16, 2018) | no assertion criteria provided      | VCV000591989 | 1                | 211019140      | 591989      | 582978      | rs1558570068 | GOF        | 0.596    | 0.036        | 0.368    |  |
| KCNH1 | 288 | R   | H   | NM_172362.3(KCNH1):c.863G>A (p.Arg288His)  | not provided                         | Uncertain significance(Last reviewed: Apr 11, 2019) | criteria provided, single submitter | VCV001308467 | 1                | 211018952      | 1308467     | 1297088     | NA           | GOF        | 0.523    | 0.027        | 0.45     |  |
| KCNH1 | 294 | T   | M   | NM_172362.3(KCNH1):c.881C>T (p.Thr294Met)  | not provided                         | Likely pathogenic(Last reviewed: Dec 5, 2018)       | criteria provided, single submitter | VCV000633559 | 1                | 211018934      | 633559      | 621937      | rs1558569964 | GOF        | 0.566    | 0.026        | 0.408    |  |
| KCNH1 | 297 | V   | M   | NM_172362.3(KCNH1):c.889G>A (p.Val297Met)  | not provided                         | Uncertain significance(Last reviewed: Jun 11, 2019) | criteria provided, single submitter | VCV001306445 | 1                | 211018926      | 1306445     | 1296388     | NA           | GOF        | 0.69     | 0.043        | 0.268    |  |
| KCNH1 | 325 | S   | Y   | NM_172362.3(KCNH1):c.1055C>A (p.Ser352Tyr) | Zimmermann-Laband syndrome 1         | Pathogenic                                          | no assertion criteria provided      | VCV000183419 | 1                | 210920047      | 183419      | 181521      | rs730882172  | GOF        | 0.469    | 0.059        | 0.472    |  |
| KCNH1 | 333 | R   | C   | NM_172362.3(KCNH1):c.1078C>T (p.Arg360Cys) | not provided                         | Pathogenic(Last reviewed: Jan 19, 2022)             | criteria provided, single submitter | VCV001190684 | 1                | 210920024      | 1190684     | 1179170     | NA           | GOF        | 0.599    | 0.123        | 0.278    |  |
| KCNH1 | 341 | R   | K   | NM_172362.3(KCNH1):c.1022G>A (p.Arg341Lys) | not provided                         | Uncertain significance(Last reviewed: Aug 8, 2019)  | criteria provided, single submitter | VCV001307585 | 1                | 211018793      | 1307585     | 1298855     | NA           | GOF        | 0.532    | 0.117        | 0.351    |  |
| KCNH1 | 345 | G   | A   | NM_172362.3(KCNH1):c.1034G>C               | Zimmermann-Laband syndrome 1 Temple- | Uncertain                                           | criteria                            | VCV000587447 | 1                | 210920068      | 587447      | 578375      | rs1558526097 | GOF        | 0.539    | 0.061        | 0.401    |  |

| gene  | pos | aa1 | aa2 | Name                                       | Condition(s)                                                                                                                                                                       | Clinical significance (Last reviewed)                     | Review status                                        | Accession    | GRCh38Chromosome | GRCh38Location | VariationID | AlleleID(s)   | dbSNP ID                | prediction | prob.LOF | prob.Neutral | prob.GOF |
|-------|-----|-----|-----|--------------------------------------------|------------------------------------------------------------------------------------------------------------------------------------------------------------------------------------|-----------------------------------------------------------|------------------------------------------------------|--------------|------------------|----------------|-------------|---------------|-------------------------|------------|----------|--------------|----------|
|       |     |     |     | (p.Gly345Ala)                              | Baraitser syndrome                                                                                                                                                                 | significance(Last reviewed: Aug 7, 2018)                  | provided, single submitter                           |              |                  |                |             |               |                         |            |          |              |          |
| KCNH1 | 348 | G   | R   | NM_172362.3(KCNH1):c.1123G>A (p.Gly375Arg) | Zimmermann-Laband syndrome 1                                                                                                                                                       | Pathogenic(Last reviewed: Jun 1, 2015)                    | no assertion criteria provided                       | VCV000183415 | 1                | 210919979      | 183415      | 181520        | rs730882174             | GOF        | 0.451    | 0.03         | 0.519    |
| KCNH1 | 352 | L   | V   | NM_172362.3(KCNH1):c.1135C>G (p.Leu379Val) | Zimmermann-Laband syndrome 1                                                                                                                                                       | Pathogenic(Last reviewed: Jun 1, 2015)                    | no assertion criteria provided                       | VCV000183416 | 1                | 210919967      | 183416      | 181519        | rs730882176             | GOF        | 0.477    | 0.045        | 0.478    |
| KCNH1 | 354 | K   | N   | NM_172362.3(KCNH1):c.1062A>C (p.Lys354Asn) | not provided                                                                                                                                                                       | Likely pathogenic(Last reviewed: Apr 12, 2016)            | criteria provided, single submitter                  | VCV000420958 | 1                | 210920040      | 420958      | 405027        | rs1064794817            | GOF        | 0.467    | 0.023        | 0.509    |
| KCNH1 | 356 | V   | L   | NM_172362.3(KCNH1):c.1147G>C (p.Val383Leu) | Zimmermann-Laband syndrome 1                                                                                                                                                       | Pathogenic                                                | no assertion criteria provided                       | VCV000183417 | 1                | 210919955      | 183417      | 181518        | rs730882173             | GOF        | 0.477    | 0.045        | 0.478    |
| KCNH1 | 356 | V   | Y   | NM_002238.3(KCNH1):c.[1066G>C;974C>A]      | Zimmermann-Laband syndrome 1                                                                                                                                                       | Pathogenic(Last reviewed: Jun 1, 2015)                    | no assertion criteria provided                       | VCV000203434 | 11               | 210919955      | 203434      | 181518 181521 | rs730882173 rs730882172 | GOF        | 0.476    | 0.036        | 0.488    |
| KCNH1 | 357 | R   | Q   | NM_172362.3(KCNH1):c.1070G>A (p.Arg357Gln) | Intellectual disability, severe Abnormal facial shape Seizures not provided KCNH1-related disorders Inborn genetic diseases Zimmermann-Laband syndrome 1 Temple-Baraitser syndrome | Pathogenic/Likely pathogenic(Last reviewed: Jan 3, 2022)  | criteria provided, multiple submitters, no conflicts | VCV000279981 | 1                | 210920032      | 279981      | 263996        | rs886041300             | GOF        | 0.389    | 0.02         | 0.591    |
| KCNH1 | 367 | A   | T   | NM_172362.3(KCNH1):c.1180G>A (p.Ala394Thr) | Zimmermann-Laband syndrome 1 Temple-Baraitser syndrome                                                                                                                             | Uncertain significance                                    | criteria provided, single submitter                  | VCV001339058 | 1                | 210919922      | 1339058     | 1330101       | NA                      | GOF        | 0.458    | 0.042        | 0.5      |
| KCNH1 | 379 | L   | P   | NM_172362.3(KCNH1):c.1136T>C (p.Leu379Pro) | not provided Neurodevelopmental disorder                                                                                                                                           | Pathogenic/Likely pathogenic(Last reviewed: Oct 27, 2020) | criteria provided, multiple submitters, no conflicts | VCV000235383 | 1                | 210919966      | 235383      | 237069        | rs878853026             | LOF        | 0.738    | 0.025        | 0.238    |
| KCNH1 | 469 | G   | R   | NM_172362.3(KCNH1):c.1486G>A (p.Gly496Arg) | Zimmermann-Laband syndrome 1 See cases not provided Inborn genetic diseases                                                                                                        | Pathogenic/Likely pathogenic(Last reviewed: Jan 6, 2022)  | criteria provided, multiple submitters, no conflicts | VCV000183418 | 1                | 210804143      | 183418      | 181517        | rs730882175             | GOF        | 0.481    | 0.033        | 0.485    |
| KCNH1 | 471 | V   | A   | NM_172362.3(KCNH1):c.1493T>C (p.Val498Ala) | Temple-Baraitser syndrome                                                                                                                                                          | Uncertain significance(Last reviewed: Dec 4, 2020)        | criteria provided, single submitter                  | VCV001285479 | 1                | 210804136      | 1285479     | 1275322       | NA                      | GOF        | 0.652    | 0.035        | 0.313    |
| KCNH1 | 489 | L   | F   | NM_172362.3(KCNH1):c.1465C>T (p.Leu489Phe) | not provided                                                                                                                                                                       | Pathogenic(Last reviewed: Aug 22, 2017)                   | criteria provided, single submitter                  | VCV000449572 | 1                | 210804164      | 449572      | 442707        | rs1553345948            | GOF        | 0.478    | 0.042        | 0.48     |
| KCNH1 | 489 | L   | F   | NM_172362.3(KCNH1):c.1465C>T (p.Leu489Phe) | not provided                                                                                                                                                                       | Pathogenic(Last reviewed: Aug 22, 2017)                   | criteria provided, single submitter                  | VCV000449572 | 1                | 210804164      | 449572      | 442707        | rs1553345948            | GOF        | 0.478    | 0.042        | 0.48     |
| KCNH1 | 489 | L   | F   | NM_172362.3(KCNH1):c.1546C>T (p.Leu516Phe) | Temple-Baraitser syndrome                                                                                                                                                          | Pathogenic(Last reviewed: Jan 1, 2015)                    | no assertion criteria provided                       | VCV000162521 | 1                | 210804083      | 162521      | 172194        | rs727502820             | GOF        | 0.478    | 0.042        | 0.48     |
| KCNH1 | 489 | L   | F   | NM_172362.3(KCNH1):c.1546C>T (p.Leu516Phe) | Temple-Baraitser syndrome                                                                                                                                                          | Pathogenic(Last reviewed: Jan 1, 2015)                    | no assertion criteria provided                       | VCV000162521 | 1                | 210804083      | 162521      | 172194        | rs727502820             | GOF        | 0.478    | 0.042        | 0.48     |
| KCNH1 | 493 | T   | N   | NM_172362.3(KCNH1):c.1478C>A (p.Thr493Asn) | not provided                                                                                                                                                                       | Likely pathogenic(Last reviewed: Jul 1, 2018)             | criteria provided, single submitter                  | VCV000807914 | 1                | 210804151      | 807914      | 794558        | rs1574266171            | GOF        | 0.56     | 0.023        | 0.417    |
| KCNH1 | 494 | I   | V   | NM_172362.3(KCNH1):c.1480A>G (p.Ile494Val) | Temple-Baraitser syndrome Zimmermann-Laband syndrome 1 not provided Zimmermann-Laband syndrome 1 Temple-Baraitser syndrome                                                         | Pathogenic(Last reviewed: Aug 4, 2017)                    | criteria provided, single submitter                  | VCV000162520 | 1                | 210804149      | 162520      | 172193        | rs727502819             | GOF        | 0.475    | 0.045        | 0.479    |
| KCNH1 | 502 | F   | S   | NM_172362.3(KCNH1):c.1505T>C               | Inborn genetic diseases                                                                                                                                                            | Uncertain                                                 | criteria                                             | VCV000521999 | 1                | 210804124      | 521999      | 511216        | rs1553345934            | GOF        | 0.702    | 0.024        | 0.274    |



| gene  | pos | aa1 | aa2 | Name                                       | Condition(s)                           | Clinical significance (Last reviewed)               | Review status                                        | Accession    | GRCh38Chromosome | GRCh38Location | VariationID | AlleleID(s) | dbSNP ID     | prediction | prob.LOF | prob.Neutral | prob.GOF |
|-------|-----|-----|-----|--------------------------------------------|----------------------------------------|-----------------------------------------------------|------------------------------------------------------|--------------|------------------|----------------|-------------|-------------|--------------|------------|----------|--------------|----------|
|       |     |     |     | (p.Phe502Ser)                              |                                        | significance(Last reviewed: Aug 7, 2017)            | provided, single submitter                           |              |                  |                |             |             |              |            |          |              |          |
| KCNH1 | 503 | Q   | R   | NM_172362.3(KCNH1):c.1508A>G (p.Gln503Arg) | Temple-Baraitser syndrome              | Pathogenic(Last reviewed: Jan 1, 2015)              | no assertion criteria provided                       | VCV000162522 | 1                | 210804121      | 162522      | 172195      | rs727502821  | GOF        | 0.448    | 0.033        | 0.519    |
| KCNH1 | 514 | V   | L   | NM_172362.3(KCNH1):c.1621G>C (p.Val541Leu) | not provided                           | Uncertain significance(Last reviewed: Dec 9, 2019)  | criteria provided, single submitter                  | VCV001310940 | 1                | 210804008      | 1310940     | 1300321     | NA           | GOF        | 0.529    | 0.073        | 0.398    |
| KCNH1 | 520 | R   | Q   | NM_172362.3(KCNH1):c.1559G>A (p.Arg520Gln) | Zimmermann-Laband syndrome 1           | Likely pathogenic(Last reviewed: Aug 6, 2018)       | criteria provided, single submitter                  | VCV001034355 | 1                | 210804070      | 1034355     | 1019279     | rs1684483227 | GOF        | 0.527    | 0.037        | 0.436    |
| KCNH1 | 531 | I   | V   | NM_172362.3(KCNH1):c.1672A>G (p.Ile558Val) | not provided                           | Uncertain significance(Last reviewed: Jun 25, 2019) | criteria provided, single submitter                  | VCV001180372 | 1                | 210797751      | 1180372     | 1168809     | NA           | GOF        | 0.579    | 0.068        | 0.352    |
| KCNH1 | 546 | R   | H   | NM_172362.3(KCNH1):c.1718G>A (p.Arg573His) | not provided                           | Uncertain significance(Last reviewed: Aug 4, 2020)  | criteria provided, single submitter                  | VCV001195149 | 1                | 210797705      | 1195149     | 1182832     | NA           | GOF        | 0.559    | 0.055        | 0.386    |
| KCNH1 | 556 | R   | Q   | NM_172362.3(KCNH1):c.1748G>A (p.Arg583Gln) | not provided                           | Uncertain significance(Last reviewed: Oct 12, 2020) | criteria provided, single submitter                  | VCV001313312 | 1                | 210797675      | 1313312     | 1303573     | NA           | GOF        | 0.595    | 0.031        | 0.374    |
| KCNH1 | 569 | V   | M   | NM_172362.3(KCNH1):c.1705G>A (p.Val569Met) | Inborn genetic diseases                | Likely pathogenic(Last reviewed: Apr 27, 2015)      | criteria provided, single submitter                  | VCV000520561 | 1                | 210797718      | 520561      | 511215      | rs1553344875 | GOF        | 0.531    | 0.046        | 0.423    |
| KCNH1 | 573 | R   | C   | NM_172362.3(KCNH1):c.1717C>T (p.Arg573Cys) | Zimmermann-Laband syndrome 1           | Uncertain significance(Last reviewed: May 10, 2019) | criteria provided, single submitter                  | VCV000930399 | 1                | 210797706      | 930399      | 918596      | rs1684345922 | GOF        | 0.661    | 0.038        | 0.302    |
| KCNH1 | 626 | T   | I   | NM_172362.3(KCNH1):c.1958C>T (p.Thr653Ile) | Zimmermann-Laband syndrome 1           | Uncertain significance(Last reviewed: Oct 2, 2019)  | criteria provided, single submitter                  | VCV000930362 | 1                | 210775502      | 930362      | 918595      | rs1683842802 | LOF        | 0.873    | 0.05         | 0.078    |
| KCNH1 | 658 | T   | M   | NM_172362.3(KCNH1):c.2054C>T (p.Thr685Met) | Temple-Baraitser syndrome not provided | Uncertain significance(Last reviewed: Jun 4, 2021)  | criteria provided, multiple submitters, no conflicts | VCV001213775 | 1                | 210775406      | 1213775     | 1203768     | NA           | GOF        | 0.572    | 0.075        | 0.353    |
| KCNH1 | 709 | P   | A   | NM_172362.3(KCNH1):c.2206C>G (p.Pro736Ala) | Temple-Baraitser syndrome              | Uncertain significance(Last reviewed: Oct 3, 2019)  | criteria provided, single submitter                  | VCV001029267 | 1                | 210684045      | 1029267     | 1015634     | rs1681345673 | LOF        | 0.737    | 0.12         | 0.143    |
| KCNH1 | 711 | R   | W   | NM_172362.3(KCNH1):c.2212C>T (p.Arg738Trp) | Inborn genetic diseases                | Uncertain significance(Last reviewed: Jul 31, 2018) | criteria provided, single submitter                  | VCV000986004 | 1                | 210684039      | 986004      | 973171      | rs908699888  | LOF        | 0.753    | 0.112        | 0.134    |
| KCNH1 | 728 | E   | D   | NM_172362.3(KCNH1):c.2265G>C (p.Glu755Asp) | Temple-Baraitser syndrome              | Likely benign                                       | no assertion criteria provided                       | VCV000689343 | 1                | 210683986      | 689343      | 676935      | rs776649794  | Neutral    | 0.651    | 0.209        | 0.139    |
| KCNH1 | 732 | R   | Q   | NM_172362.3(KCNH1):c.2276G>A (p.Arg759Gln) | not provided                           | Benign/Likely benign(Last reviewed: Sep 3, 2019)    | criteria provided, multiple submitters, no conflicts | VCV000755041 | 1                | 210683975      | 755041      | 761535      | rs141905481  | Neutral    | 0.665    | 0.185        | 0.15     |
| KCNH1 | 734 | D   | E   | NM_172362.3(KCNH1):c.2202C>A (p.Asp734Glu) | not provided                           | Uncertain significance(Last reviewed: Jan 8,        | criteria provided, single submitter                  | VCV000852617 | 1                | 210684049      | 852617      | 823310      | rs1226108094 | Neutral    | 0.656    | 0.2          | 0.145    |

| gene  | pos | aa1 | aa2 | Name                                       | Condition(s)                                                            | Clinical significance (Last reviewed)                                      | Review status                                        | Accession    | GRCh38Chromosome | GRCh38Location | VariationID | AlleleID(s) | dbSNP ID     | prediction | prob.LOF | prob.Neutral | prob.GOF |
|-------|-----|-----|-----|--------------------------------------------|-------------------------------------------------------------------------|----------------------------------------------------------------------------|------------------------------------------------------|--------------|------------------|----------------|-------------|-------------|--------------|------------|----------|--------------|----------|
|       |     |     |     |                                            |                                                                         | 2019)                                                                      |                                                      |              |                  |                |             |             |              |            |          |              |          |
| KCNH1 | 749 | A   | G   | NM_172362.3(KCNH1):c.2327C>G (p.Ala776Gly) | not provided                                                            | Benign/Likely benign (Last reviewed: Dec 2, 2020)                          | criteria provided, multiple submitters, no conflicts | VCV001124856 | 1                | 210683924      | 1124856     | 1109980     | NA           | Neutral    | 0.669    | 0.196        | 0.136    |
| KCNH1 | 764 | R   | H   | NM_172362.3(KCNH1):c.2372G>A (p.Arg791His) | not provided                                                            | Benign (Last reviewed: Jan 22, 2021)                                       | criteria provided, single submitter                  | VCV001247790 | 1                | 210683879      | 1247790     | 1237744     | NA           | Neutral    | 0.685    | 0.188        | 0.127    |
| KCNH1 | 785 | A   | T   | NM_172362.3(KCNH1):c.2434G>A (p.Ala812Thr) | not provided                                                            | Benign/Likely benign (Last reviewed: Feb 20, 2020)                         | criteria provided, multiple submitters, no conflicts | VCV000717772 | 1                | 210683817      | 717772      | 718601      | rs759775665  | GOF        | 0.486    | 0.188        | 0.326    |
| KCNH1 | 792 | S   | T   | NM_172362.3(KCNH1):c.2455T>A (p.Ser819Thr) | not provided                                                            | Benign (Last reviewed: Dec 5, 2020)                                        | criteria provided, multiple submitters, no conflicts | VCV000707060 | 1                | 210683796      | 707060      | 690478      | rs139659266  | GOF        | 0.4      | 0.173        | 0.427    |
| KCNH1 | 794 | C   | Y   | NM_172362.3(KCNH1):c.2462G>A (p.Cys821Tyr) | not provided                                                            | Likely benign (Last reviewed: May 21, 2020)                                | criteria provided, single submitter                  | VCV001181381 | 1                | 210683789      | 1181381     | 1170657     | NA           | Neutral    | 0.549    | 0.192        | 0.259    |
| KCNH1 | 799 | G   | V   | NM_172362.3(KCNH1):c.2477G>T (p.Gly826Val) | not provided                                                            | Benign (Last reviewed: Aug 9, 2019)                                        | criteria provided, single submitter                  | VCV001250452 | 1                | 210683774      | 1250452     | 1239539     | NA           | GOF        | 0.485    | 0.206        | 0.309    |
| KCNH1 | 801 | G   | R   | NM_172362.3(KCNH1):c.2482G>A (p.Gly828Arg) | not provided   Zimmermann-Laband syndrome 1   Temple-Baraitser syndrome | Conflicting interpretations of pathogenicity (Last reviewed: Mar 19, 2021) | criteria provided, conflicting interpretations       | VCV001216384 | 1                | 210683769      | 1216384     | 1206364     | NA           | GOF        | 0.52     | 0.163        | 0.317    |
| KCNH1 | 802 | G   | D   | NM_172362.3(KCNH1):c.2486G>A (p.Gly829Asp) | not provided                                                            | Uncertain significance (Last reviewed: Jul 17, 2019)                       | criteria provided, single submitter                  | VCV001304074 | 1                | 210683765      | 1304074     | 1294349     | NA           | Neutral    | 0.581    | 0.174        | 0.245    |
| KCNH1 | 841 | A   | V   | NM_172362.3(KCNH1):c.2603C>T (p.Ala868Val) | not provided                                                            | Uncertain significance (Last reviewed: Nov 1, 2019)                        | criteria provided, single submitter                  | VCV000807913 | 1                | 210683648      | 807913      | 794557      | rs773735492  | Neutral    | 0.498    | 0.218        | 0.284    |
| KCNH1 | 896 | Q   | P   | NM_172362.3(KCNH1):c.2768A>C (p.Gln923Pro) | not provided                                                            | Benign/Likely benign (Last reviewed: Dec 31, 2019)                         | criteria provided, multiple submitters, no conflicts | VCV000778789 | 1                | 210683483      | 778789      | 696435      | rs140939826  | GOF        | 0.495    | 0.193        | 0.312    |
| KCNH1 | 903 | R   | G   | NM_172362.3(KCNH1):c.2788A>G (p.Arg930Gly) | not provided                                                            | Uncertain significance (Last reviewed: Jun 10, 2019)                       | criteria provided, single submitter                  | VCV001306379 | 1                | 210683463      | 1306379     | 1296322     | NA           | Neutral    | 0.548    | 0.216        | 0.236    |
| KCNH1 | 915 | A   | T   | NM_172362.3(KCNH1):c.2824G>A (p.Ala942Thr) | not provided                                                            | Likely benign (Last reviewed: Aug 14, 2020)                                | criteria provided, single submitter                  | VCV001213227 | 1                | 210683427      | 1213227     | 1203221     | NA           | GOF        | 0.482    | 0.162        | 0.356    |
| KCNH1 | 954 | S   | A   | NM_172362.3(KCNH1):c.2941T>G (p.Ser981Ala) | Intellectual disability                                                 | Likely benign (Last reviewed: Jan 1, 2019)                                 | no assertion criteria provided                       | VCV000975411 | 1                | 210683310      | 975411      | 963469      | rs1681318890 | LOF        | 0.693    | 0.099        | 0.209    |
| KCNH1 | 961 | A   | S   | NM_172362.3(KCNH1):c.2962G>T (p.Ala988Ser) | not provided                                                            | Benign/Likely benign (Last reviewed: Oct 5, 2020)                          | criteria provided, multiple submitters, no conflicts | VCV000710791 | 1                | 210683289      | 710791      | 718600      | rs371262198  | GOF        | 0.53     | 0.156        | 0.314    |
| KCNH2 | 1   | M   | L   | NM_000238.4(KCNH2):c.1A>T (p.Met1Leu)      | Congenital long QT syndrome                                             | not provided                                                               | no assertion provided                                | VCV000067354 | 7                | 150977913      | 67354       | 78250       | rs199473036  | Neutral    | 0.562    | 0.248        | 0.19     |

| gene  | pos | aa1 | aa2 | Name                                    | Condition(s)                                                                    | Clinical significance (Last reviewed)                                     | Review status                                        | Accession    | GRCh38Chromosome | GRCh38Location | VariationID | AlleleID(s) | dbSNP ID     | prediction | prob.LOF | prob.Neutral | prob.GOF |
|-------|-----|-----|-----|-----------------------------------------|---------------------------------------------------------------------------------|---------------------------------------------------------------------------|------------------------------------------------------|--------------|------------------|----------------|-------------|-------------|--------------|------------|----------|--------------|----------|
| KCNH2 | 2   | A   | V   | NM_000238.4(KCNH2):c.1128+1792C>T       | Long QT syndrome                                                                | Uncertain significance(Last reviewed: Aug 31, 2016)                       | criteria provided, single submitter                  | VCV000405348 | 7                | 150955499      | 405348      | 396180      | rs1060500667 | Neutral    | 0.52     | 0.291        | 0.189    |
| KCNH2 | 6   | G   | R   | NM_000238.4(KCNH2):c.1128+1803G>A       | Arrhythmia                                                                      | Likely benign(Last reviewed: Apr 30, 2018)                                | criteria provided, single submitter                  | VCV000630104 | 7                | 150955488      | 630104      | 619280      | rs553291120  | LOF        | 0.704    | 0.082        | 0.214    |
| KCNH2 | 6   | G   | W   | NM_000238.4(KCNH2):c.1128+1803G>T       | Arrhythmia                                                                      | Likely benign(Last reviewed: Jul 26, 2019)                                | criteria provided, single submitter                  | VCV000925674 | 7                | 150955488      | 925674      | 915425      | rs553291120  | LOF        | 0.698    | 0.124        | 0.179    |
| KCNH2 | 8   | A   | V   | NM_000238.4(KCNH2):c.1128+1810C>T       | Short QT syndrome 1 Long QT syndrome 2 Long QT syndrome Arrhythmia not provided | Conflicting interpretations of pathogenicity(Last reviewed: Oct 28, 2020) | criteria provided, conflicting interpretations       | VCV000379235 | 7                | 150955481      | 379235      | 369621      | rs972201049  | Neutral    | 0.636    | 0.252        | 0.112    |
| KCNH2 | 9   | A   | V   | NM_000238.4(KCNH2):c.26C>T (p.Ala9Val)  | Arrhythmia not provided Long QT syndrome                                        | Uncertain significance(Last reviewed: Oct 4, 2019)                        | criteria provided, multiple submitters, no conflicts | VCV000200592 | 7                | 150977888      | 200592      | 197374      | rs775317201  | LOF        | 0.769    | 0.128        | 0.103    |
| KCNH2 | 10  | P   | L   | NM_000238.4(KCNH2):c.29C>T (p.Pro10Leu) | Long QT syndrome                                                                | Uncertain significance(Last reviewed: May 2, 2019)                        | criteria provided, single submitter                  | VCV000946979 | 7                | 150977885      | 946979      | 924765      | rs1383782501 | LOF        | 0.733    | 0.142        | 0.125    |
| KCNH2 | 11  | Q   | R   | NM_000238.4(KCNH2):c.32A>G (p.Gln11Arg) | Long QT syndrome                                                                | Uncertain significance(Last reviewed: Oct 28, 2020)                       | criteria provided, single submitter                  | VCV001063296 | 7                | 150977882      | 1063296     | 1044817     | NA           | LOF        | 0.703    | 0.098        | 0.199    |
| KCNH2 | 12  | G   | V   | NM_000238.4(KCNH2):c.1128+1822G>T       | not provided Long QT syndrome                                                   | Likely benign(Last reviewed: Feb 9, 2018)                                 | criteria provided, single submitter                  | VCV000697451 | 7                | 150955469      | 697451      | 689864      | rs781494018  | LOF        | 0.773    | 0.099        | 0.128    |
| KCNH2 | 12  | G   | W   | NM_000238.4(KCNH2):c.1128+1821G>T       | Arrhythmia                                                                      | Likely benign(Last reviewed: Dec 3, 2018)                                 | criteria provided, single submitter                  | VCV000926092 | 7                | 150955470      | 926092      | 915893      | rs1801336913 | LOF        | 0.745    | 0.09         | 0.165    |
| KCNH2 | 13  | T   | N   | NM_000238.4(KCNH2):c.38C>A (p.Thr13Asn) | Long QT syndrome Arrhythmia                                                     | Uncertain significance(Last reviewed: Aug 2, 2020)                        | criteria provided, multiple submitters, no conflicts | VCV000923223 | 7                | 150977876      | 923223      | 910811      | rs758978727  | LOF        | 0.808    | 0.087        | 0.105    |
| KCNH2 | 15  | L   | Q   | NM_000238.4(KCNH2):c.44T>A (p.Leu15Gln) | not provided                                                                    | Uncertain significance(Last reviewed: Mar 20, 2018)                       | criteria provided, single submitter                  | VCV000200594 | 7                | 150977870      | 200594      | 197372      | rs794728418  | LOF        | 0.894    | 0.036        | 0.07     |
| KCNH2 | 15  | L   | R   | NM_000238.4(KCNH2):c.44T>G (p.Leu15Arg) | not provided                                                                    | Uncertain significance(Last reviewed: Sep 16, 2020)                       | criteria provided, single submitter                  | VCV001206671 | 7                | 150977870      | 1206671     | 1197659     | NA           | LOF        | 0.881    | 0.033        | 0.085    |
| KCNH2 | 15  | R   | W   | NM_000238.4(KCNH2):c.1128+1830C>T       | Long QT syndrome Arrhythmia                                                     | Likely benign(Last reviewed: Nov 29, 2019)                                | criteria provided, multiple submitters, no conflicts | VCV000700755 | 7                | 150955461      | 700755      | 689863      | rs778819756  | LOF        | 0.853    | 0.047        | 0.1      |
| KCNH2 | 16  | D   | A   | NM_000238.4(KCNH2):c.47A>C (p.Asp16Ala) | Congenital long QT syndrome                                                     | not provided                                                              | no assertion provided                                | VCV000067507 | 7                | 150977867      | 67507       | 78403       | rs199472825  | LOF        | 0.86     | 0.042        | 0.097    |
| KCNH2 | 17  | R   | S   | NM_000238.4(KCNH2):c.1128+1838G>C       | Arrhythmia                                                                      | Likely benign(Last reviewed: Dec 16, 2018)                                | criteria provided, single submitter                  | VCV000921782 | 7                | 150955453      | 921782      | 915887      | rs1310476998 | LOF        | 0.883    | 0.045        | 0.072    |
| KCNH2 | 19  | I   | F   | NM_000238.4(KCNH2):c.55A>T (p.Ile19Phe) | Long QT syndrome                                                                | Uncertain significance(Last reviewed: Nov 19, 2018)                       | criteria provided, single submitter                  | VCV000527023 | 7                | 150977859      | 527023      | 522804      | rs1554431444 | LOF        | 0.852    | 0.058        | 0.089    |

| gene  | pos | aa1 | aa2 | Name                                    | Condition(s)                             | Clinical significance (Last reviewed)                                     | Review status                                        | Accession    | GRCh38Chromosome | GRCh38Location | VariationID | AlleleID(s) | dbSNP ID     | prediction | prob.LOF | prob.Neutral | prob.GOF |
|-------|-----|-----|-----|-----------------------------------------|------------------------------------------|---------------------------------------------------------------------------|------------------------------------------------------|--------------|------------------|----------------|-------------|-------------|--------------|------------|----------|--------------|----------|
| KCNH2 | 19  | I   | S   | NM_000238.4(KCNH2):c.56T>G (p.Ile19Ser) | Long QT syndrome                         | Uncertain significance(Last reviewed: Jun 27, 2019)                       | criteria provided, single submitter                  | VCV000949641 | 7                | 150977858      | 949641      | 924764      | rs1802016246 | LOF        | 0.891    | 0.034        | 0.074    |
| KCNH2 | 20  | R   | G   | NM_000238.4(KCNH2):c.58C>G (p.Arg20Gly) | not provided Congenital long QT syndrome | Uncertain significance(Last reviewed: Apr 22, 2020)                       | criteria provided, single submitter                  | VCV000067513 | 7                | 150977856      | 67513       | 78409       | rs199473486  | LOF        | 0.804    | 0.071        | 0.126    |
| KCNH2 | 21  | G   | D   | NM_000238.4(KCNH2):c.1128+1849G>A       | Long QT syndrome                         | Uncertain significance(Last reviewed: Dec 29, 2017)                       | criteria provided, single submitter                  | VCV000526911 | 7                | 150955442      | 526911      | 522779      | rs1167016668 | LOF        | 0.848    | 0.034        | 0.118    |
| KCNH2 | 22  | F   | S   | NM_000238.4(KCNH2):c.65T>C (p.Phe22Ser) | Congenital long QT syndrome              | not provided                                                              | no assertion provided                                | VCV000067517 | 7                | 150977849      | 67517       | 78413       | rs199472826  | LOF        | 0.881    | 0.043        | 0.076    |
| KCNH2 | 22  | R   | Q   | NM_000238.4(KCNH2):c.1128+1852G>A       | Long QT syndrome Arrhythmia              | Likely benign(Last reviewed: Oct 16, 2018)                                | criteria provided, multiple submitters, no conflicts | VCV000527075 | 7                | 150955439      | 527075      | 523141      | rs780068180  | LOF        | 0.874    | 0.037        | 0.089    |
| KCNH2 | 22  | R   | W   | NM_000238.4(KCNH2):c.1128+1851C>T       | not provided Long QT syndrome            | Likely benign(Last reviewed: Jul 20, 2018)                                | criteria provided, single submitter                  | VCV000728449 | 7                | 150955440      | 728449      | 744317      | rs1584860856 | LOF        | 0.835    | 0.053        | 0.111    |
| KCNH2 | 23  | V   | M   | NM_000238.4(KCNH2):c.1128+1854G>A       | Long QT syndrome not provided            | Likely benign(Last reviewed: Apr 25, 2018)                                | criteria provided, single submitter                  | VCV000701801 | 7                | 150955437      | 701801      | 689862      | rs995080056  | LOF        | 0.776    | 0.089        | 0.135    |
| KCNH2 | 25  | R   | Q   | NM_000238.4(KCNH2):c.1128+1861G>A       | Arrhythmia                               | Likely benign(Last reviewed: Jul 3, 2018)                                 | criteria provided, single submitter                  | VCV000630562 | 7                | 150955430      | 630562      | 619374      | rs413111009  | LOF        | 0.731    | 0.105        | 0.164    |
| KCNH2 | 25  | R   | W   | NM_000238.4(KCNH2):c.1128+1860C>T       | not provided Arrhythmialong QT syndrome  | Conflicting interpretations of pathogenicity(Last reviewed: Nov 5, 2020)  | criteria provided, conflicting interpretations       | VCV000661053 | 7                | 150955431      | 661053      | 635915      | rs767264288  | Neutral    | 0.682    | 0.151        | 0.168    |
| KCNH2 | 26  | S   | G   | NM_000238.4(KCNH2):c.76A>G (p.Ser26Gly) | Arrhythmia                               | Uncertain significance(Last reviewed: Nov 18, 2020)                       | criteria provided, single submitter                  | VCV000928116 | 7                | 150977838      | 928116      | 910809      | rs1802015752 | LOF        | 0.75     | 0.117        | 0.133    |
| KCNH2 | 26  | S   | I   | NM_000238.4(KCNH2):c.77G>T (p.Ser26Ile) | Congenital long QT syndrome              | not provided                                                              | no assertion provided                                | VCV000067528 | 7                | 150974941      | 67528       | 78424       | rs199472827  | Neutral    | 0.688    | 0.164        | 0.148    |
| KCNH2 | 27  | R   | H   | NM_000238.4(KCNH2):c.80G>A (p.Arg27His) | Long QT syndrome not provided            | Conflicting interpretations of pathogenicity(Last reviewed: Jun 29, 2019) | criteria provided, conflicting interpretations       | VCV000200540 | 7                | 150974938      | 200540      | 197368      | rs199472828  | LOF        | 0.749    | 0.119        | 0.132    |
| KCNH2 | 27  | R   | P   | NM_000238.4(KCNH2):c.80G>C (p.Arg27Pro) | Congenital long QT syndrome              | not provided                                                              | no assertion provided                                | VCV000067530 | 7                | 150974938      | 67530       | 78426       | rs199472828  | LOF        | 0.766    | 0.104        | 0.129    |
| KCNH2 | 27  | V   | L   | NM_000238.4(KCNH2):c.1128+1866G>T       | Arrhythmia                               | Likely benign(Last reviewed: Jul 2, 2019)                                 | criteria provided, single submitter                  | VCV000921664 | 7                | 150955425      | 921664      | 915423      | rs764462112  | Neutral    | 0.714    | 0.164        | 0.122    |
| KCNH2 | 28  | K   | E   | NM_000238.4(KCNH2):c.82A>G (p.Lys28Glu) | Congenital long QT syndrome              | not provided                                                              | no assertion provided                                | VCV000067532 | 7                | 150974936      | 67532       | 78428       | rs199472829  | LOF        | 0.855    | 0.05         | 0.095    |
| KCNH2 | 28  | R   | C   | NM_000238.4(KCNH2):c.1128+1869C>T       | Long QT syndrome Arrhythmia              | Likely benign(Last reviewed: Jun 20, 2020)                                | criteria provided, multiple submitters, no conflicts | VCV000695712 | 7                | 150955422      | 695712      | 685211      | rs62492438   | LOF        | 0.866    | 0.054        | 0.08     |
| KCNH2 | 28  | R   | H   | NM_000238.4(KCNH2):c.1128+1870G>A       | Arrhythmia                               | Likely benign(Last reviewed: Nov 8, 2018)                                 | criteria provided, single submitter                  | VCV000922307 | 7                | 150955421      | 922307      | 915889      | rs1219643674 | LOF        | 0.864    | 0.048        | 0.088    |
| KCNH2 | 29  | F   | L   | NM_000238.4(KCNH2):c.87C>A (p.Phe29Leu) | Congenital long QT syndrome Long QT      | Pathogenic(Last reviewed: Jun 27, 2019)                                   | criteria provided, single submitter                  | VCV000067538 | 7                | 150974931      | 67538       | 78434       | rs199472830  | LOF        | 0.856    | 0.048        | 0.096    |

| gene  | pos | aa1 | aa2 | Name                                     | Condition(s)                                 | Clinical significance (Last reviewed)                                     | Review status                                  | Accession    | GRCh38Chromosome | GRCh38Location | VariationID | AlleleID(s) | dbSNP ID     | prediction | prob.LOF | prob.Neutral | prob.GOF |  |
|-------|-----|-----|-----|------------------------------------------|----------------------------------------------|---------------------------------------------------------------------------|------------------------------------------------|--------------|------------------|----------------|-------------|-------------|--------------|------------|----------|--------------|----------|--|
|       |     |     |     |                                          | syndrome                                     |                                                                           | reviewed: Jun 29, 2020)                        |              |                  |                |             |             |              |            |          |              |          |  |
| KCNH2 | 29  | F   | S   | NM_000238.4(KCNH2):c.86T>C (p.Phe29Ser)  | Congenital long QT syndrome                  | not provided                                                              | no assertion provided                          | VCV000067536 | 7                | 150974932      | 67536       | 78432       | rs199472831  | LOF        | 0.859    | 0.046        | 0.095    |  |
| KCNH2 | 29  | I   | F   | NM_000238.4(KCNH2):c.1128+1872A>T        | Arrhythmia                                   | Likely benign(Last reviewed: May 20, 2019)                                | criteria provided, single submitter            | VCV000918543 | 7                | 150955419      | 918543      | 916160      | rs1801332643 | LOF        | 0.867    | 0.046        | 0.087    |  |
| KCNH2 | 30  | I   | T   | NM_000238.4(KCNH2):c.89T>C (p.Ile30Thr)  | Long QT syndrome Congenital long QT syndrome | Uncertain significance(Last reviewed: Apr 11, 2018)                       | criteria provided, single submitter            | VCV000067541 | 7                | 150974929      | 67541       | 78437       | rs199472832  | LOF        | 0.858    | 0.045        | 0.097    |  |
| KCNH2 | 31  | I   | M   | NM_000238.4(KCNH2):c.93C>G (p.Ile31Met)  | Long QT syndrome                             | Uncertain significance(Last reviewed: Feb 14, 2019)                       | criteria provided, single submitter            | VCV000839172 | 7                | 150974925      | 839172      | 833364      | rs745885744  | LOF        | 0.865    | 0.045        | 0.09     |  |
| KCNH2 | 31  | I   | N   | NM_000238.4(KCNH2):c.92T>A (p.Ile31Asn)  | Long QT syndrome 2                           | Likely pathogenic(Last reviewed: Feb 14, 2018)                            | criteria provided, single submitter            | VCV000520423 | 7                | 150974926      | 520423      | 511026      | rs199472833  | LOF        | 0.864    | 0.045        | 0.091    |  |
| KCNH2 | 31  | I   | S   | NM_000238.4(KCNH2):c.92T>G (p.Ile31Ser)  | Congenital long QT syndrome                  | not provided                                                              | no assertion provided                          | VCV000067546 | 7                | 150974926      | 67546       | 78442       | rs199472833  | LOF        | 0.859    | 0.045        | 0.096    |  |
| KCNH2 | 31  | I   | T   | NM_000238.4(KCNH2):c.92T>C (p.Ile31Thr)  | not provided Congenital long QT syndrome     | Likely pathogenic(Last reviewed: Jan 12, 2021)                            | criteria provided, single submitter            | VCV000067545 | 7                | 150974926      | 67545       | 78441       | rs199472833  | LOF        | 0.858    | 0.044        | 0.098    |  |
| KCNH2 | 32  | A   | T   | NM_000238.4(KCNH2):c.94G>A (p.Ala32Thr)  | Congenital long QT syndrome Arrhythmia       | Uncertain significance(Last reviewed: Oct 6, 2020)                        | criteria provided, single submitter            | VCV000067549 | 7                | 150974924      | 67549       | 78445       | rs199472834  | LOF        | 0.867    | 0.045        | 0.088    |  |
| KCNH2 | 32  | A   | V   | NM_000238.4(KCNH2):c.95C>T (p.Ala32Val)  | Long QT syndrome 2                           | Pathogenic(Last reviewed: Oct 12, 2019)                                   | criteria provided, single submitter            | VCV000869439 | 7                | 150974923      | 869439      | 857648      | rs1801941580 | LOF        | 0.869    | 0.047        | 0.084    |  |
| KCNH2 | 33  | N   | T   | NM_000238.4(KCNH2):c.98A>C (p.Asn33Thr)  | Long QT syndrome not provided                | Conflicting interpretations of pathogenicity(Last reviewed: Apr 29, 2021) | criteria provided, conflicting interpretations | VCV000067553 | 7                | 150974920      | 67553       | 78449       | rs199473487  | LOF        | 0.852    | 0.051        | 0.097    |  |
| KCNH2 | 33  | V   | M   | NM_000238.4(KCNH2):c.1128+1884G>A        | Long QT syndrome Arrhythmia                  | Conflicting interpretations of pathogenicity(Last reviewed: Feb 16, 2019) | criteria provided, conflicting interpretations | VCV000654625 | 7                | 150955407      | 654625      | 651783      | rs765679790  | LOF        | 0.831    | 0.078        | 0.091    |  |
| KCNH2 | 34  | A   | V   | NM_000238.4(KCNH2):c.1128+1888C>T        | Long QT syndrome                             | Likely benign(Last reviewed: Jul 21, 2017)                                | criteria provided, single submitter            | VCV000456881 | 7                | 150955403      | 456881      | 457103      | rs1031478932 | LOF        | 0.863    | 0.039        | 0.098    |  |
| KCNH2 | 36  | E   | D   | NM_000238.4(KCNH2):c.1128+1895G>C        | Long QT syndrome                             | Uncertain significance(Last reviewed: Apr 19, 2017)                       | criteria provided, single submitter            | VCV000405347 | 7                | 150955396      | 405347      | 396175      | rs1060500666 | LOF        | 0.832    | 0.047        | 0.12     |  |
| KCNH2 | 39  | C   | R   | NM_000238.4(KCNH2):c.115T>C (p.Cys39Arg) | Long QT syndrome                             | Uncertain significance(Last reviewed: Jul 10, 2017)                       | criteria provided, single submitter            | VCV000456883 | 7                | 150974903      | 456883      | 456891      | rs757491162  | LOF        | 0.81     | 0.038        | 0.152    |  |
| KCNH2 | 40  | A   | V   | NM_000238.4(KCNH2):c.119C>T (p.Ala40Val) | not provided                                 | Likely pathogenic(Last reviewed: Sep 30, 2013)                            | criteria provided, single submitter            | VCV000200544 | 7                | 150974899      | 200544      | 197364      | rs794728407  | LOF        | 0.871    | 0.047        | 0.082    |  |
| KCNH2 | 41  | V   | A   | NM_000238.4(KCNH2):c.122T>C (p.Val41Ala) | Congenital long QT syndrome                  | not provided                                                              | no assertion provided                          | VCV000067169 | 7                | 150974896      | 67169       | 78065       | rs731506     | LOF        | 0.867    | 0.044        | 0.089    |  |

| gene  | pos | aa1 | aa2 | Name                                       | Condition(s)                                              | Clinical significance (Last reviewed)                     | Review status                                        | Accession    | GRCh38Chromosome | GRCh38Location | VariationID | AlleleID(s) | dbSNP ID     | prediction | prob.LOF | prob.Neutral | prob.GOF |
|-------|-----|-----|-----|--------------------------------------------|-----------------------------------------------------------|-----------------------------------------------------------|------------------------------------------------------|--------------|------------------|----------------|-------------|-------------|--------------|------------|----------|--------------|----------|
| KCNH2 | 41  | V   | F   | NM_000238.4(KCNH2):c.121G>T (p.Val41Phe)   | Congenital long QT syndrome                               | not provided                                              | no assertion provided                                | VCV000067167 | 7                | 150974897      | 67167       | 78063       | rs199472835  | LOF        | 0.873    | 0.044        | 0.083    |
| KCNH2 | 41  | V   | L   | NM_000238.4(KCNH2):c.121G>C (p.Val41Leu)   | not provided                                              | Likely pathogenic(Last reviewed: Apr 9, 2015)             | criteria provided, single submitter                  | VCV000372589 | 7                | 150974897      | 372589      | 359813      | rs199472835  | LOF        | 0.868    | 0.046        | 0.086    |
| KCNH2 | 42  | I   | N   | NM_000238.4(KCNH2):c.125T>A (p.Ile42Asn)   | Congenital long QT syndrome                               | not provided                                              | no assertion provided                                | VCV000067172 | 7                | 150974893      | 67172       | 78068       | rs199473488  | LOF        | 0.868    | 0.045        | 0.086    |
| KCNH2 | 42  | I   | T   | NM_000238.4(KCNH2):c.125T>C (p.Ile42Thr)   | not provided                                              | Pathogenic(Last reviewed: Mar 15, 2013)                   | criteria provided, single submitter                  | VCV000200546 | 7                | 150974893      | 200546      | 197363      | rs199473488  | LOF        | 0.863    | 0.044        | 0.093    |
| KCNH2 | 43  | D   | E   | NM_000238.4(KCNH2):c.1149C>A (p.Asp383Glu) | Arrhythmia                                                | Uncertain significance(Last reviewed: Nov 9, 2018)        | criteria provided, single submitter                  | VCV000925167 | 7                | 150952833      | 925167      | 910780      | rs201995634  | LOF        | 0.867    | 0.054        | 0.079    |
| KCNH2 | 43  | Y   | C   | NM_000238.4(KCNH2):c.128A>G (p.Tyr43Cys)   | Congenital long QT syndromelnot providedlLong QT syndrome | Pathogenic/Likely pathogenic(Last reviewed: May 21, 2020) | criteria provided, multiple submitters, no conflicts | VCV000067182 | 7                | 150974890      | 67182       | 78078       | rs199472836  | LOF        | 0.857    | 0.047        | 0.096    |
| KCNH2 | 43  | Y   | D   | NM_000238.4(KCNH2):c.127T>G (p.Tyr43Asp)   | Congenital long QT syndrome                               | not provided                                              | no assertion provided                                | VCV000067177 | 7                | 150974891      | 67177       | 78073       | rs199472837  | LOF        | 0.872    | 0.046        | 0.082    |
| KCNH2 | 44  | C   | F   | NM_000238.4(KCNH2):c.131G>T (p.Cys44Phe)   | Congenital long QT syndrome                               | not provided                                              | no assertion provided                                | VCV000067186 | 7                | 150974887      | 67186       | 78082       | rs199473489  | LOF        | 0.87     | 0.052        | 0.078    |
| KCNH2 | 44  | C   | W   | NM_000238.4(KCNH2):c.132C>G (p.Cys44Trp)   | Congenital long QT syndrome                               | not provided                                              | no assertion provided                                | VCV000067187 | 7                | 150974886      | 67187       | 78083       | rs199472838  | LOF        | 0.869    | 0.055        | 0.075    |
| KCNH2 | 44  | C   | Y   | NM_000238.4(KCNH2):c.131G>A (p.Cys44Tyr)   | not provided                                              | Likely pathogenic(Last reviewed: Jul 23, 2021)            | criteria provided, single submitter                  | VCV001214199 | 7                | 150974887      | 1214199     | 1204184     | NA           | LOF        | 0.869    | 0.051        | 0.08     |
| KCNH2 | 45  | N   | K   | NM_000238.4(KCNH2):c.135C>A (p.Asn45Lys)   | Long QT syndrome                                          | Uncertain significance(Last reviewed: Nov 6, 2018)        | criteria provided, single submitter                  | VCV000569898 | 7                | 150974883      | 569898      | 564168      | rs1422251865 | LOF        | 0.812    | 0.027        | 0.161    |
| KCNH2 | 45  | N   | T   | NM_000238.4(KCNH2):c.134A>C (p.Asn45Thr)   | Long QT syndrome                                          | Uncertain significance(Last reviewed: Jun 5, 2019)        | criteria provided, single submitter                  | VCV000949254 | 7                | 150974884      | 949254      | 924763      | rs1801939758 | LOF        | 0.854    | 0.037        | 0.109    |
| KCNH2 | 45  | N   | Y   | NM_000238.4(KCNH2):c.133A>T (p.Asn45Tyr)   | Congenital long QT syndrome                               | not provided                                              | no assertion provided                                | VCV000067189 | 7                | 150974885      | 67189       | 78085       | rs199472839  | LOF        | 0.833    | 0.038        | 0.129    |
| KCNH2 | 46  | D   | E   | NM_000238.4(KCNH2):c.138C>G (p.Asp46Glu)   | Arrhythmia                                                | Uncertain significance(Last reviewed: May 30, 2019)       | criteria provided, single submitter                  | VCV000921751 | 7                | 150974880      | 921751      | 910805      | rs752503743  | LOF        | 0.846    | 0.021        | 0.134    |
| KCNH2 | 46  | D   | G   | NM_000238.4(KCNH2):c.137A>G (p.Asp46Gly)   | not provided                                              | Uncertain significance(Last reviewed: Mar 25, 2021)       | criteria provided, single submitter                  | VCV001303967 | 7                | 150974881      | 1303967     | 1294242     | NA           | LOF        | 0.865    | 0.026        | 0.109    |
| KCNH2 | 46  | D   | N   | NM_000238.4(KCNH2):c.136G>A (p.Asp46Asn)   | not provided                                              | Likely pathogenic(Last reviewed: Mar 9, 2015)             | criteria provided, single submitter                  | VCV000200551 | 7                | 150974882      | 200551      | 197361      | rs794728408  | LOF        | 0.856    | 0.022        | 0.122    |
| KCNH2 | 47  | G   | C   | NM_000238.4(KCNH2):c.139G>T (p.Gly47Cys)   | not providedlLong QT syndrome 2                           | Pathogenic/Likely pathogenic(Last reviewed: Dec 19, 2019) | criteria provided, multiple submitters, no conflicts | VCV000200553 | 7                | 150974879      | 200553      | 197360      | rs794728409  | LOF        | 0.886    | 0.023        | 0.091    |
| KCNH2 | 47  | G   | V   | NM_000238.4(KCNH2):c.140G>T (p.Gly47Val)   | Congenital long QT syndrome                               | not provided                                              | no assertion provided                                | VCV000067195 | 7                | 150974878      | 67195       | 78091       | rs199473490  | LOF        | 0.882    | 0.023        | 0.096    |

| gene  | pos | aa1 | aa2 | Name                                       | Condition(s)                                                           | Clinical significance (Last reviewed)                                     | Review status                                        | Accession    | GRCh38Chromosome | GRCh38Location | VariationID | AlleleID(s) | dbSNP ID     | prediction | prob.LOF | prob.Neutral | prob.GOF |
|-------|-----|-----|-----|--------------------------------------------|------------------------------------------------------------------------|---------------------------------------------------------------------------|------------------------------------------------------|--------------|------------------|----------------|-------------|-------------|--------------|------------|----------|--------------|----------|
| KCNH2 | 49  | C   | F   | NM_000238.4(KCNH2):c.146G>T (p.Cys49Phe)   | Long QT syndrome 2                                                     | Likely pathogenic(Last reviewed: Nov 26, 2019)                            | criteria provided, single submitter                  | VCV000972694 | 7                | 150974872      | 972694      | 961001      | rs199472840  | LOF        | 0.852    | 0.036        | 0.112    |
| KCNH2 | 49  | C   | W   | NM_000238.4(KCNH2):c.147C>G (p.Cys49Trp)   | not provided                                                           | Pathogenic(Last reviewed: Jun 19, 2013)                                   | criteria provided, single submitter                  | VCV000200555 | 7                | 150974871      | 200555      | 197359      | rs794728410  | LOF        | 0.85     | 0.033        | 0.117    |
| KCNH2 | 49  | C   | Y   | NM_000238.4(KCNH2):c.146G>A (p.Cys49Tyr)   | Congenital long QT syndrome                                            | not provided                                                              | no assertion provided                                | VCV000067203 | 7                | 150974872      | 67203       | 78099       | rs199472840  | LOF        | 0.864    | 0.028        | 0.108    |
| KCNH2 | 50  | E   | D   | NM_000238.4(KCNH2):c.150G>T (p.Glu50Asp)   | short QT syndrome                                                      | not provided                                                              | no assertion provided                                | VCV000067211 | 7                | 150974868      | 67211       | 78107       | rs199472841  | LOF        | 0.818    | 0.044        | 0.138    |
| KCNH2 | 50  | E   | Q   | NM_000238.4(KCNH2):c.148G>C (p.Glu50Gln)   | Long QT syndrome                                                       | Uncertain significance(Last reviewed: Jul 9, 2019)                        | criteria provided, single submitter                  | VCV000935728 | 7                | 150974870      | 935728      | 933786      | rs1801938958 | LOF        | 0.81     | 0.047        | 0.142    |
| KCNH2 | 52  | C   | W   | NM_000238.4(KCNH2):c.156C>G (p.Cys52Trp)   | Long QT syndrome                                                       | Uncertain significance(Last reviewed: Sep 10, 2020)                       | criteria provided, single submitter                  | VCV000972150 | 7                | 150974862      | 972150      | 955098      | rs754921704  | LOF        | 0.827    | 0.045        | 0.128    |
| KCNH2 | 53  | G   | D   | NM_000238.4(KCNH2):c.158G>A (p.Gly53Asp)   | Congenital long QT syndrome                                            | not provided                                                              | no assertion provided                                | VCV000067217 | 7                | 150974860      | 67217       | 78113       | rs199473491  | LOF        | 0.867    | 0.023        | 0.11     |
| KCNH2 | 53  | G   | R   | NM_000238.4(KCNH2):c.157G>C (p.Gly53Arg)   | Congenital long QT syndrome Arrhythmic not provided                    | Pathogenic/Likely pathogenic(Last reviewed: Oct 23, 2020)                 | criteria provided, multiple submitters, no conflicts | VCV000067215 | 7                | 150974861      | 67215       | 78111       | rs199472842  | LOF        | 0.828    | 0.023        | 0.148    |
| KCNH2 | 53  | G   | S   | NM_000238.4(KCNH2):c.157G>A (p.Gly53Ser)   | Congenital long QT syndrome                                            | not provided                                                              | no assertion provided                                | VCV000067214 | 7                | 150974861      | 67214       | 78110       | rs199472842  | LOF        | 0.872    | 0.026        | 0.102    |
| KCNH2 | 54  | R   | C   | NM_000238.4(KCNH2):c.1180C>T (p.Arg394Cys) | Long QT syndrome                                                       | Uncertain significance(Last reviewed: Jun 18, 2020)                       | criteria provided, single submitter                  | VCV000855813 | 7                | 150952802      | 855813      | 833343      | rs1325776019 | LOF        | 0.788    | 0.099        | 0.113    |
| KCNH2 | 54  | R   | H   | NM_000238.4(KCNH2):c.1181G>A (p.Arg394His) | Arrhythmic Long QT syndrome                                            | Uncertain significance(Last reviewed: Feb 25, 2020)                       | criteria provided, multiple submitters, no conflicts | VCV000565408 | 7                | 150952801      | 565408      | 566581      | rs781140785  | LOF        | 0.837    | 0.068        | 0.095    |
| KCNH2 | 54  | Y   | H   | NM_000238.4(KCNH2):c.160T>C (p.Tyr54His)   | Prolonged QT interval Sudden cardiac death Congenital long QT syndrome | Uncertain significance(Last reviewed: Mar 25, 2019)                       | criteria provided, single submitter                  | VCV000067223 | 7                | 150974858      | 67223       | 78119       | rs199472843  | LOF        | 0.841    | 0.069        | 0.09     |
| KCNH2 | 55  | S   | L   | NM_000238.4(KCNH2):c.164C>T (p.Ser55Leu)   | Long QT syndrome Congenital long QT syndrome not provided              | Conflicting interpretations of pathogenicity(Last reviewed: Oct 9, 2020)  | criteria provided, conflicting interpretations       | VCV000067224 | 7                | 150974854      | 67224       | 78120       | rs199472844  | LOF        | 0.78     | 0.103        | 0.117    |
| KCNH2 | 56  | R   | L   | NM_000238.4(KCNH2):c.167G>T (p.Arg56Leu)   | not provided Long QT syndrome                                          | Conflicting interpretations of pathogenicity(Last reviewed: Dec 10, 2020) | criteria provided, conflicting interpretations       | VCV000200557 | 7                | 150974851      | 200557      | 197356      | rs199472845  | LOF        | 0.852    | 0.041        | 0.107    |
| KCNH2 | 56  | R   | Q   | NM_000238.4(KCNH2):c.167G>A (p.Arg56Gln)   | Long QT syndrome Congenital long QT syndrome                           | Likely pathogenic(Last reviewed: Aug 9, 2018)                             | criteria provided, single submitter                  | VCV000067228 | 7                | 150974851      | 67228       | 78124       | rs199472845  | LOF        | 0.875    | 0.028        | 0.098    |
| KCNH2 | 57  | A   | P   | NM_000238.4(KCNH2):c.169G>C (p.Ala57Pro)   | Long QT syndrome Congenital long QT syndrome                           | Uncertain significance(Last reviewed: Jul 22, 2019)                       | criteria provided, single submitter                  | VCV000067240 | 7                | 150974849      | 67240       | 78136       | rs199472846  | LOF        | 0.882    | 0.04         | 0.078    |
| KCNH2 | 57  | A   | T   | NM_000238.4(KCNH2):c.169G>A (p.Ala57Thr)   | Long QT syndrome                                                       | Uncertain significance(Last reviewed: Jul 22, 2019)                       | criteria provided, single submitter                  | VCV000654924 | 7                | 150974849      | 654924      | 635930      | rs199472846  | LOF        | 0.879    | 0.047        | 0.074    |

| gene  | pos | aa1 | aa2 | Name                                       | Condition(s)                                              | Clinical significance (Last reviewed)                                     | Review status                                        | Accession    | GRCh38Chromosome | GRCh38Location | VariationID | AlleleID(s) | dbSNP ID     | prediction | prob.LOF | prob.Neutral | prob.GOF |
|-------|-----|-----|-----|--------------------------------------------|-----------------------------------------------------------|---------------------------------------------------------------------------|------------------------------------------------------|--------------|------------------|----------------|-------------|-------------|--------------|------------|----------|--------------|----------|
|       |     |     |     |                                            |                                                           | reviewed: Sep 21, 2018)                                                   | submitter                                            |              |                  |                |             |             |              |            |          |              |          |
| KCNH2 | 57  | A   | V   | NM_000238.4(KCNH2):c.170C>T (p.Ala57Val)   | not provided                                              | Likely pathogenic(Last reviewed: Sep 3, 2014)                             | criteria provided, single submitter                  | VCV000200775 | 7                | 150974848      | 200775      | 197355      | rs794728493  | LOF        | 0.86     | 0.058        | 0.082    |
| KCNH2 | 57  | R   | C   | NM_000238.4(KCNH2):c.1189C>T (p.Arg397Cys) | ArrhythmiaLong QT syndrome Cardiovascular phenotype       | Uncertain significance(Last reviewed: Oct 28, 2018)                       | criteria provided, multiple submitters, no conflicts | VCV000405343 | 7                | 150952793      | 405343      | 395706      | rs1060500663 | LOF        | 0.85     | 0.049        | 0.102    |
| KCNH2 | 57  | R   | H   | NM_000238.4(KCNH2):c.1190G>A (p.Arg397His) | Long QT syndrome Arrhythmia                               | Uncertain significance(Last reviewed: Jun 7, 2021)                        | criteria provided, multiple submitters, no conflicts | VCV000851410 | 7                | 150952792      | 851410      | 833342      | rs368817970  | LOF        | 0.881    | 0.033        | 0.086    |
| KCNH2 | 58  | E   | A   | NM_000238.4(KCNH2):c.173A>C (p.Glu58Ala)   | Congenital long QT syndrome                               | not provided                                                              | no assertion provided                                | VCV000067256 | 7                | 150974845      | 67256       | 78152       | rs199472847  | LOF        | 0.861    | 0.04         | 0.099    |
| KCNH2 | 58  | E   | D   | NM_000238.4(KCNH2):c.174G>C (p.Glu58Asp)   | Congenital long QT syndrome                               | not provided                                                              | no assertion provided                                | VCV000067260 | 7                | 150974844      | 67260       | 78156       | rs199473492  | LOF        | 0.858    | 0.029        | 0.113    |
| KCNH2 | 58  | E   | G   | NM_000238.4(KCNH2):c.173A>G (p.Glu58Gly)   | Congenital long QT syndrome not provided                  | Likely pathogenic(Last reviewed: Jan 14, 2021)                            | criteria provided, single submitter                  | VCV000067257 | 7                | 150974845      | 67257       | 78153       | rs199472847  | LOF        | 0.864    | 0.038        | 0.099    |
| KCNH2 | 58  | E   | K   | NM_000238.4(KCNH2):c.172G>A (p.Glu58Lys)   | not provided Long QT syndrome Congenital long QT syndrome | Likely pathogenic(Last reviewed: Aug 30, 2021)                            | criteria provided, multiple submitters, no conflicts | VCV000067254 | 7                | 150974846      | 67254       | 78150       | rs199473413  | LOF        | 0.837    | 0.029        | 0.134    |
| KCNH2 | 62  | R   | Q   | NM_000238.4(KCNH2):c.185G>A (p.Arg62Gln)   | Congenital long QT syndrome Long QT syndrome              | Uncertain significance(Last reviewed: May 10, 2019)                       | criteria provided, single submitter                  | VCV000067298 | 7                | 150974833      | 67298       | 78194       | rs199473664  | LOF        | 0.801    | 0.072        | 0.127    |
| KCNH2 | 63  | P   | H   | NM_000238.4(KCNH2):c.188C>A (p.Pro63His)   | Long QT syndrome not provided                             | Conflicting interpretations of pathogenicity(Last reviewed: Sep 24, 2021) | criteria provided, conflicting interpretations       | VCV000200559 | 7                | 150974830      | 200559      | 197354      | rs766379103  | LOF        | 0.801    | 0.086        | 0.112    |
| KCNH2 | 64  | C   | W   | NM_000238.4(KCNH2):c.192C>G (p.Cys64Trp)   | Congenital long QT syndrome                               | not provided                                                              | no assertion provided                                | VCV000067338 | 7                | 150974826      | 67338       | 78234       | rs199473414  | LOF        | 0.789    | 0.071        | 0.14     |
| KCNH2 | 64  | C   | Y   | NM_000238.4(KCNH2):c.191G>A (p.Cys64Tyr)   | Congenital long QT syndrome                               | not provided                                                              | no assertion provided                                | VCV000067335 | 7                | 150974827      | 67335       | 78231       | rs199473415  | LOF        | 0.799    | 0.063        | 0.138    |
| KCNH2 | 65  | T   | P   | NM_000238.4(KCNH2):c.193A>C (p.Thr65Pro)   | Long QT syndrome 2 Congenital long QT syndrome            | Pathogenic(Last reviewed: Dec 13, 2002)                                   | no assertion criteria provided                       | VCV000014434 | 7                | 150974825      | 14434       | 29473       | rs121912511  | LOF        | 0.828    | 0.079        | 0.092    |
| KCNH2 | 65  | T   | S   | NM_000238.4(KCNH2):c.194C>G (p.Thr65Ser)   | Long QT syndrome                                          | Uncertain significance(Last reviewed: Feb 17, 2016)                       | criteria provided, single submitter                  | VCV000237295 | 7                | 150974824      | 237295      | 240004      | rs878853772  | LOF        | 0.803    | 0.104        | 0.092    |
| KCNH2 | 66  | C   | G   | NM_000238.4(KCNH2):c.196T>G (p.Cys66Gly)   | Congenital long QT syndrome                               | not provided                                                              | no assertion provided                                | VCV000067351 | 7                | 150974822      | 67351       | 78247       | rs199473416  | LOF        | 0.856    | 0.048        | 0.096    |
| KCNH2 | 66  | C   | R   | NM_000238.4(KCNH2):c.196T>C (p.Cys66Arg)   | Long QT syndrome                                          | Uncertain significance(Last reviewed: Aug 3, 2017)                        | criteria provided, single submitter                  | VCV000456900 | 7                | 150974822      | 456900      | 456496      | rs199473416  | LOF        | 0.858    | 0.06         | 0.082    |
| KCNH2 | 66  | C   | Y   | NM_000238.4(KCNH2):c.197G>A (p.Cys66Tyr)   | Long QT syndrome 2                                        | Likely pathogenic(Last reviewed: May 18, 2018)                            | criteria provided, single submitter                  | VCV000545688 | 7                | 150974821      | 545688      | 536180      | rs1554430943 | LOF        | 0.856    | 0.06         | 0.084    |



| gene  | pos | aa1 | aa2 | Name                                       | Condition(s)                                              | Clinical significance (Last reviewed)                     | Review status                                        | Accession    | GRCh38Chromosome | GRCh38Location | VariationID | AlleleID(s) | dbSNP ID     | prediction | prob.LOF | prob.Neutral | prob.GOF |
|-------|-----|-----|-----|--------------------------------------------|-----------------------------------------------------------|-----------------------------------------------------------|------------------------------------------------------|--------------|------------------|----------------|-------------|-------------|--------------|------------|----------|--------------|----------|
| KCNH2 | 67  | D   | G   | NM_000238.4(KCNH2):c.200A>G (p.Asp67Gly)   | Long QT syndrome                                          | Uncertain significance(Last reviewed: Oct 9, 2020)        | criteria provided, single submitter                  | VCV001047548 | 7                | 150974818      | 1047548     | 1027904     | rs1801935588 | LOF        | 0.815    | 0.099        | 0.086    |
| KCNH2 | 68  | F   | C   | NM_000238.4(KCNH2):c.203T>G (p.Phe68Cys)   | Long QT syndrome                                          | Uncertain significance(Last reviewed: Oct 18, 2019)       | criteria provided, single submitter                  | VCV000940257 | 7                | 150974815      | 940257      | 933785      | rs1801935420 | LOF        | 0.854    | 0.075        | 0.071    |
| KCNH2 | 68  | F   | L   | NM_000238.4(KCNH2):c.202T>C (p.Phe68Leu)   | Congenital long QT syndrome not provided                  | Likely pathogenic(Last reviewed: May 10, 2014)            | criteria provided, single submitter                  | VCV000067355 | 7                | 150974816      | 67355       | 78251       | rs199473417  | LOF        | 0.837    | 0.09         | 0.072    |
| KCNH2 | 69  | L   | P   | NM_000238.4(KCNH2):c.206T>C (p.Leu69Pro)   | Congenital long QT syndrome                               | not provided                                              | no assertion provided                                | VCV000067358 | 7                | 150974812      | 67358       | 78254       | rs199473665  | LOF        | 0.873    | 0.061        | 0.066    |
| KCNH2 | 69  | L   | Q   | NM_000238.4(KCNH2):c.206T>A (p.Leu69Gln)   | Long QT syndrome                                          | Uncertain significance(Last reviewed: Dec 12, 2016)       | criteria provided, single submitter                  | VCV000520445 | 7                | 150974812      | 520445      | 511088      | rs199473665  | LOF        | 0.871    | 0.061        | 0.068    |
| KCNH2 | 69  | V   | M   | NM_000238.4(KCNH2):c.1225G>A (p.Val409Met) | Wolff-Parkinson-White pattern Arrhythmic Long QT syndrome | Uncertain significance(Last reviewed: Oct 27, 2020)       | criteria provided, multiple submitters, no conflicts | VCV000456884 | 7                | 150952757      | 456884      | 457546      | rs539146547  | LOF        | 0.848    | 0.079        | 0.073    |
| KCNH2 | 70  | H   | N   | NM_000238.4(KCNH2):c.208C>A (p.His70Asn)   | Congenital long QT syndrome                               | not provided                                              | no assertion provided                                | VCV000067362 | 7                | 150974810      | 67362       | 78258       | rs199473418  | LOF        | 0.796    | 0.093        | 0.111    |
| KCNH2 | 70  | H   | R   | NM_000238.4(KCNH2):c.209A>G (p.His70Arg)   | Long QT syndrome Congenital long QT syndrome not provided | Pathogenic/Likely pathogenic(Last reviewed: Jun 29, 2021) | criteria provided, multiple submitters, no conflicts | VCV000067363 | 7                | 150974809      | 67363       | 78259       | rs199473419  | LOF        | 0.773    | 0.08         | 0.147    |
| KCNH2 | 71  | D   | N   | NM_000238.4(KCNH2):c.1231G>A (p.Asp411Asn) | Long QT syndrome                                          | Uncertain significance(Last reviewed: Aug 27, 2019)       | criteria provided, single submitter                  | VCV000941613 | 7                | 150952751      | 941613      | 933774      | rs1801230141 | LOF        | 0.823    | 0.061        | 0.116    |
| KCNH2 | 71  | G   | E   | NM_000238.4(KCNH2):c.212G>A (p.Gly71Glu)   | Cardiovascular phenotype                                  | Likely pathogenic(Last reviewed: Oct 27, 2015)            | criteria provided, single submitter                  | VCV000264521 | 7                | 150974806      | 264521      | 258468      | rs886039183  | LOF        | 0.823    | 0.05         | 0.127    |
| KCNH2 | 71  | G   | R   | NM_000238.4(KCNH2):c.211G>A (p.Gly71Arg)   | Long QT syndrome                                          | Uncertain significance(Last reviewed: Sep 30, 2019)       | criteria provided, single submitter                  | VCV000948713 | 7                | 150974807      | 948713      | 924762      | rs199473420  | LOF        | 0.781    | 0.048        | 0.171    |
| KCNH2 | 71  | G   | R   | NM_000238.4(KCNH2):c.211G>A (p.Gly71Arg)   | Long QT syndrome                                          | Uncertain significance(Last reviewed: Sep 30, 2019)       | criteria provided, single submitter                  | VCV000948713 | 7                | 150974807      | 948713      | 924762      | rs199473420  | LOF        | 0.781    | 0.048        | 0.171    |
| KCNH2 | 71  | G   | R   | NM_000238.4(KCNH2):c.211G>C (p.Gly71Arg)   | Long QT syndrome Congenital long QT syndrome not provided | Pathogenic(Last reviewed: Feb 11, 2019)                   | criteria provided, multiple submitters, no conflicts | VCV000067366 | 7                | 150974807      | 67366       | 78262       | rs199473420  | LOF        | 0.781    | 0.048        | 0.171    |
| KCNH2 | 71  | G   | R   | NM_000238.4(KCNH2):c.211G>C (p.Gly71Arg)   | Long QT syndrome Congenital long QT syndrome not provided | Pathogenic(Last reviewed: Feb 11, 2019)                   | criteria provided, multiple submitters, no conflicts | VCV000067366 | 7                | 150974807      | 67366       | 78262       | rs199473420  | LOF        | 0.781    | 0.048        | 0.171    |
| KCNH2 | 71  | G   | W   | NM_000238.4(KCNH2):c.211G>T (p.Gly71Trp)   | Long QT syndrome                                          | Uncertain significance(Last reviewed: Feb 19, 2019)       | criteria provided, single submitter                  | VCV000853484 | 7                | 150974807      | 853484      | 833362      | rs199473420  | LOF        | 0.783    | 0.076        | 0.141    |
| KCNH2 | 72  | P   | L   | NM_000238.4(KCNH2):c.215C>T (p.Pro72Leu)   | Congenital long QT syndrome not provided                  | Pathogenic(Last reviewed: Feb 19, 2019)                   | criteria provided, single submitter                  | VCV000067370 | 7                | 150974803      | 67370       | 78266       | rs199473421  | LOF        | 0.815    | 0.075        | 0.109    |

| gene  | pos | aa1 | aa2 | Name                                     | Condition(s)                                                                                          | Clinical significance (Last reviewed)                                     | Review status                                        | Accession     | GRCh38Chromosome | GRCh38Location | VariationID | AlleleID(s) | dbSNP ID     | prediction | prob.LOF | prob.Neutral | prob.GOF |
|-------|-----|-----|-----|------------------------------------------|-------------------------------------------------------------------------------------------------------|---------------------------------------------------------------------------|------------------------------------------------------|---------------|------------------|----------------|-------------|-------------|--------------|------------|----------|--------------|----------|
|       |     |     |     |                                          |                                                                                                       | reviewed: Jul 3, 2019)                                                    | provided, single submitter                           |               |                  |                |             |             |              |            |          |              |          |
| KCNH2 | 72  | P   | Q   | NM_000238.4(KCNH2):c.215C>A (p.Pro72Gln) | Long QT syndrome Congenital long QT syndrome Long QT syndrome 2 Cardiovascular phenotype not provided | Pathogenic/Likely pathogenic(Last reviewed: Oct 3, 2020)                  | criteria provided, multiple submitters, no conflicts | VCV000067368  | 7                | 150974803      | 67368       | 78264       | rs199473421  | LOF        | 0.842    | 0.051        | 0.108    |
| KCNH2 | 72  | P   | R   | NM_000238.4(KCNH2):c.215C>G (p.Pro72Arg) | Long QT syndrome Congenital long QT syndrome                                                          | Uncertain significance(Last reviewed: Jun 22, 2019)                       | criteria provided, single submitter                  | VCV000067369  | 7                | 150974803      | 67369       | 78265       | rs199473421  | LOF        | 0.806    | 0.045        | 0.149    |
| KCNH2 | 72  | P   | S   | NM_000238.4(KCNH2):c.214C>T (p.Pro72Ser) | not provided                                                                                          | Pathogenic(Last reviewed: Apr 12, 2014)                                   | criteria provided, single submitter                  | VCV000200564  | 7                | 150974804      | 200564      | 197353      | rs794728411  | LOF        | 0.851    | 0.06         | 0.089    |
| KCNH2 | 74  | T   | A   | NM_000238.4(KCNH2):c.220A>G (p.Thr74Ala) | Long QT syndrome                                                                                      | Uncertain significance(Last reviewed: Sep 24, 2020)                       | criteria provided, single submitter                  | VCV001040732  | 7                | 150974798      | 1040732     | 1027903     | rs199473666  | LOF        | 0.882    | 0.044        | 0.074    |
| KCNH2 | 74  | T   | M   | NM_000238.4(KCNH2):c.221C>T (p.Thr74Met) | Long QT syndrome not provided                                                                         | Conflicting interpretations of pathogenicity(Last reviewed: Jul 11, 2018) | criteria provided, conflicting interpretations       | VCV000067377  | 7                | 150974797      | 67377       | 78273       | rs199473422  | LOF        | 0.872    | 0.049        | 0.079    |
| KCNH2 | 74  | T   | P   | NM_000238.4(KCNH2):c.220A>C (p.Thr74Pro) | Congenital long QT syndrome                                                                           | not provided                                                              | no assertion provided                                | VCV000067375  | 7                | 150974798      | 67375       | 78271       | rs199473666  | LOF        | 0.887    | 0.035        | 0.077    |
| KCNH2 | 74  | T   | R   | NM_000238.4(KCNH2):c.221C>G (p.Thr74Arg) | Long QT syndrome Congenital long QT syndrome not provided                                             | Conflicting interpretations of pathogenicity(Last reviewed: Dec 13, 2019) | criteria provided, conflicting interpretations       | VCV000067376  | 7                | 150974797      | 67376       | 78272       | rs199473422  | LOF        | 0.851    | 0.032        | 0.117    |
| KCNH2 | 75  | Q   | E   | NM_000238.4(KCNH2):c.223C>G (p.Gln75Glu) | Long QT syndrome                                                                                      | Uncertain significance(Last reviewed: Jan 31, 2020)                       | criteria provided, single submitter                  | VCV001023341  | 7                | 150974795      | 1023341     | 1007360     | rs1801933977 | LOF        | 0.832    | 0.064        | 0.104    |
| KCNH2 | 76  | R   | L   | NM_000238.4(KCNH2):c.227G>T (p.Arg76Leu) | Arrhythmia                                                                                            | Uncertain significance(Last reviewed: Oct 30, 2018)                       | criteria provided, single submitter                  | VCV0000629614 | 7                | 150974791      | 629614      | 617357      | rs868054429  | Neutral    | 0.691    | 0.174        | 0.135    |
| KCNH2 | 78  | A   | P   | NM_000238.4(KCNH2):c.232G>C (p.Ala78Pro) | Congenital long QT syndrome                                                                           | not provided                                                              | no assertion provided                                | VCV000067386  | 7                | 150974786      | 67386       | 78282       | rs199472848  | LOF        | 0.886    | 0.04         | 0.074    |
| KCNH2 | 78  | A   | T   | NM_000238.4(KCNH2):c.232G>A (p.Ala78Thr) | not provided                                                                                          | Likely pathogenic(Last reviewed: Jun 22, 2021)                            | criteria provided, single submitter                  | VCV001197726  | 7                | 150974786      | 1197726     | 1187214     | NA           | LOF        | 0.884    | 0.046        | 0.071    |
| KCNH2 | 78  | A   | V   | NM_000238.4(KCNH2):c.233C>T (p.Ala78Val) | Long QT syndrome                                                                                      | Uncertain significance(Last reviewed: Jul 16, 2019)                       | criteria provided, single submitter                  | VCV000957483  | 7                | 150974785      | 957483      | 945531      | rs1801933488 | LOF        | 0.864    | 0.056        | 0.08     |
| KCNH2 | 79  | A   | P   | NM_000238.4(KCNH2):c.235G>C (p.Ala79Pro) | not provided                                                                                          | Uncertain significance(Last reviewed: Dec 2, 2019)                        | criteria provided, single submitter                  | VCV000200778  | 7                | 150974783      | 200778      | 197352      | rs794728494  | LOF        | 0.88     | 0.048        | 0.072    |
| KCNH2 | 79  | A   | S   | NM_000238.4(KCNH2):c.235G>T (p.Ala79Ser) | Long QT syndrome                                                                                      | Uncertain significance(Last reviewed: Mar 23, 2017)                       | criteria provided, single submitter                  | VCV000456907  | 7                | 150974783      | 456907      | 457116      | rs794728494  | LOF        | 0.878    | 0.052        | 0.069    |
| KCNH2 | 79  | A   | T   | NM_000238.4(KCNH2):c.235G>A (p.Ala79Thr) | Arrhythmia not specified                                                                              | Uncertain significance(Last reviewed: Apr 5, 2021)                        | criteria provided, multiple submitters, no conflicts | VCV000987798  | 7                | 150974783      | 987798      | 975792      | rs794728494  | LOF        | 0.875    | 0.056        | 0.069    |

| gene  | pos | aa1 | aa2 | Name                                     | Condition(s)                                                       | Clinical significance (Last reviewed)               | Review status                                        | Accession    | GRCh38Chromosome | GRCh38Location | VariationID | AlleleID(s) | dbSNP ID     | prediction | prob.LOF | prob.Neutral | prob.GOF |
|-------|-----|-----|-----|------------------------------------------|--------------------------------------------------------------------|-----------------------------------------------------|------------------------------------------------------|--------------|------------------|----------------|-------------|-------------|--------------|------------|----------|--------------|----------|
| KCNH2 | 80  | A   | P   | NM_000238.4(KCNH2):c.238G>C (p.Ala80Pro) | Congenital long QT syndrome                                        | not provided                                        | no assertion provided                                | VCV000067392 | 7                | 150974780      | 67392       | 78288       | rs199473037  | LOF        | 0.854    | 0.063        | 0.083    |
| KCNH2 | 80  | A   | T   | NM_000238.4(KCNH2):c.238G>A (p.Ala80Thr) | not provided                                                       | Uncertain significance(Last reviewed: Dec 27, 2019) | criteria provided, single submitter                  | VCV001311334 | 7                | 150974780      | 1311334     | 1300715     | NA           | LOF        | 0.841    | 0.081        | 0.078    |
| KCNH2 | 80  | A   | V   | NM_000238.4(KCNH2):c.239C>T (p.Ala80Val) | Sudden cardiac death                                               | not provided                                        | no assertion provided                                | VCV000067395 | 7                | 150974779      | 67395       | 78291       | rs199473493  | LOF        | 0.817    | 0.098        | 0.085    |
| KCNH2 | 81  | Q   | H   | NM_000238.4(KCNH2):c.243G>C (p.Gln81His) | Long QT syndrome 1 Long QT syndrome  Congenital long QT syndrome   | Uncertain significance(Last reviewed: Mar 7, 2018)  | criteria provided, multiple submitters, no conflicts | VCV000067399 | 7                | 150974775      | 67399       | 78295       | rs199472849  | LOF        | 0.864    | 0.045        | 0.091    |
| KCNH2 | 82  | I   | T   | NM_000238.4(KCNH2):c.245T>C (p.Ile82Thr) | Long QT syndrome 2                                                 | Likely pathogenic(Last reviewed: Jun 5, 2017)       | criteria provided, single submitter                  | VCV000585220 | 7                | 150974773      | 585220      | 576259      | rs1563189895 | LOF        | 0.897    | 0.038        | 0.064    |
| KCNH2 | 83  | A   | S   | NM_000238.4(KCNH2):c.247G>T (p.Ala83Ser) | Long QT syndrome                                                   | Uncertain significance(Last reviewed: Jul 11, 2018) | criteria provided, single submitter                  | VCV000643651 | 7                | 150974771      | 643651      | 635929      | rs1554430909 | LOF        | 0.881    | 0.042        | 0.077    |
| KCNH2 | 84  | Q   | R   | NM_000238.4(KCNH2):c.251A>G (p.Gln84Arg) | Long QT syndrome 2                                                 | Uncertain significance(Last reviewed: Oct 6, 2021)  | criteria provided, single submitter                  | VCV001299593 | 7                | 150974767      | 1299593     | 1289647     | NA           | LOF        | 0.821    | 0.043        | 0.136    |
| KCNH2 | 85  | A   | P   | NM_000238.4(KCNH2):c.253G>C (p.Ala85Pro) | Congenital long QT syndrome                                        | not provided                                        | no assertion provided                                | VCV000067410 | 7                | 150974765      | 67410       | 78306       | rs199472850  | LOF        | 0.9      | 0.028        | 0.072    |
| KCNH2 | 85  | A   | T   | NM_000238.4(KCNH2):c.253G>A (p.Ala85Thr) | Long QT syndrome                                                   | Uncertain significance(Last reviewed: Dec 14, 2018) | criteria provided, single submitter                  | VCV000456912 | 7                | 150974765      | 456912      | 456887      | rs199472850  | LOF        | 0.897    | 0.032        | 0.07     |
| KCNH2 | 85  | A   | V   | NM_000238.4(KCNH2):c.254C>T (p.Ala85Val) | Congenital long QT syndrome                                        | not provided                                        | no assertion provided                                | VCV000067411 | 7                | 150974764      | 67411       | 78307       | rs199473494  | LOF        | 0.885    | 0.039        | 0.076    |
| KCNH2 | 86  | L   | P   | NM_000238.4(KCNH2):c.257T>C (p.Leu86Pro) | Congenital long QT syndrome not provided                           | Uncertain significance(Last reviewed: Dec 31, 2020) | criteria provided, single submitter                  | VCV000067413 | 7                | 150974761      | 67413       | 78309       | rs199472851  | LOF        | 0.897    | 0.039        | 0.065    |
| KCNH2 | 86  | L   | R   | NM_000238.4(KCNH2):c.257T>G (p.Leu86Arg) | Congenital long QT syndrome                                        | not provided                                        | no assertion provided                                | VCV000067414 | 7                | 150974761      | 67414       | 78310       | rs199472851  | LOF        | 0.883    | 0.031        | 0.085    |
| KCNH2 | 87  | L   | P   | NM_000238.4(KCNH2):c.260T>C (p.Leu87Pro) | Congenital long QT syndrome not provided                           | Likely pathogenic                                   | no assertion criteria provided                       | VCV000067418 | 7                | 150974758      | 67418       | 78314       | rs199473495  | LOF        | 0.842    | 0.071        | 0.087    |
| KCNH2 | 91  | E   | D   | NM_000238.4(KCNH2):c.273G>T (p.Glu91Asp) | not provided                                                       | Uncertain significance(Last reviewed: May 16, 2019) | criteria provided, single submitter                  | VCV001305882 | 7                | 150974745      | 1305882     | 1297153     | NA           | LOF        | 0.728    | 0.079        | 0.193    |
| KCNH2 | 92  | R   | C   | NM_000238.4(KCNH2):c.274C>T (p.Arg92Cys) | Long QT syndrome 2 not provided Arrhythmic  Long QT syndrome       | Uncertain significance(Last reviewed: Jan 20, 2021) | criteria provided, multiple submitters, no conflicts | VCV000200573 | 7                | 150974744      | 200573      | 197348      | rs563611707  | LOF        | 0.867    | 0.054        | 0.079    |
| KCNH2 | 92  | R   | L   | NM_000238.4(KCNH2):c.275G>T (p.Arg92Leu) | not provided                                                       | Uncertain significance(Last reviewed: Jun 25, 2019) | criteria provided, single submitter                  | VCV000200575 | 7                | 150974743      | 200575      | 197347      | rs794728413  | LOF        | 0.87     | 0.053        | 0.077    |
| KCNH2 | 92  | R   | P   | NM_000238.4(KCNH2):c.275G>C (p.Arg92Pro) | Long QT syndrome                                                   | Uncertain significance(Last reviewed: Jun 26, 2019) | criteria provided, single submitter                  | VCV000947667 | 7                | 150974743      | 947667      | 924761      | rs794728413  | LOF        | 0.87     | 0.054        | 0.076    |
| KCNH2 | 93  | K   | R   | NM_000238.4(KCNH2):c.278A>G (p.Lys93Arg) | Long QT syndrome not provided Arrhythmic  Cardiovascular phenotype | Likely benign(Last reviewed: Nov 15,                | criteria provided,                                   | VCV000413325 | 7                | 150974740      | 413325      | 395497      | rs780197027  | LOF        | 0.857    | 0.058        | 0.085    |

| gene  | pos | aa1 | aa2 | Name                                       | Condition(s)                                                                                    | Clinical significance (Last reviewed)                                     | Review status                                        | Accession    | GRCh38Chromosome | GRCh38Location | VariationID | AlleleID(s) | dbSNP ID     | prediction | prob.LOF | prob.Neutral | prob.GOF |  |
|-------|-----|-----|-----|--------------------------------------------|-------------------------------------------------------------------------------------------------|---------------------------------------------------------------------------|------------------------------------------------------|--------------|------------------|----------------|-------------|-------------|--------------|------------|----------|--------------|----------|--|
|       |     |     |     |                                            |                                                                                                 | 2020)                                                                     | multiple submitters, no conflicts                    |              |                  |                |             |             |              |            |          |              |          |  |
| KCNH2 | 94  | V   | G   | NM_000238.4(KCNH2):c.281T>G (p.Val94Gly)   | Long QT syndromelCongenital long QT syndrome                                                    | Uncertain significance(Last reviewed: Sep 10, 2018)                       | criteria provided, single submitter                  | VCV000067441 | 7                | 150974737      | 67441       | 78337       | rs199472852  | LOF        | 0.874    | 0.048        | 0.078    |  |
| KCNH2 | 94  | V   | L   | NM_000238.4(KCNH2):c.280G>C (p.Val94Leu)   | Long QT syndrome                                                                                | Uncertain significance(Last reviewed: Jan 9, 2020)                        | criteria provided, single submitter                  | VCV001052852 | 7                | 150974738      | 1052852     | 1044815     | NA           | LOF        | 0.867    | 0.047        | 0.086    |  |
| KCNH2 | 94  | V   | M   | NM_000238.4(KCNH2):c.280G>A (p.Val94Met)   | Long QT syndromel                                                                               | Uncertain significance(Last reviewed: Aug 3, 2020)                        | criteria provided, single submitter                  | VCV001055911 | 7                | 150974738      | 1055911     | 1044816     | NA           | LOF        | 0.87     | 0.044        | 0.086    |  |
| KCNH2 | 95  | E   | A   | NM_000238.4(KCNH2):c.284A>C (p.Glu95Ala)   | not providedlLong QT syndrome                                                                   | Uncertain significance(Last reviewed: Oct 15, 2020)                       | criteria provided, multiple submitters, no conflicts | VCV000200578 | 7                | 150974734      | 200578      | 197346      | rs794728414  | LOF        | 0.867    | 0.054        | 0.08     |  |
| KCNH2 | 96  | I   | T   | NM_000238.4(KCNH2):c.287T>C (p.Ile96Thr)   | Congenital long QT syndrome                                                                     | not provided                                                              | no assertion provided                                | VCV000067448 | 7                | 150974731      | 67448       | 78344       | rs199472853  | LOF        | 0.86     | 0.044        | 0.096    |  |
| KCNH2 | 96  | I   | V   | NM_000238.4(KCNH2):c.286A>G (p.Ile96Val)   | Congenital long QT syndrome                                                                     | not provided                                                              | no assertion provided                                | VCV000067446 | 7                | 150974732      | 67446       | 78342       | rs199473496  | LOF        | 0.863    | 0.048        | 0.089    |  |
| KCNH2 | 97  | A   | G   | NM_000238.4(KCNH2):c.290C>G (p.Ala97Gly)   | not provided                                                                                    | Uncertain significance(Last reviewed: May 16, 2012)                       | criteria provided, single submitter                  | VCV000200580 | 7                | 150974728      | 200580      | 197345      | rs794728415  | LOF        | 0.873    | 0.051        | 0.076    |  |
| KCNH2 | 98  | F   | C   | NM_000238.4(KCNH2):c.293T>G (p.Phe98Cys)   | Long QT syndromel                                                                               | Uncertain significance(Last reviewed: Mar 29, 2019)                       | criteria provided, single submitter                  | VCV000946662 | 7                | 150974725      | 946662      | 924760      | rs1801930040 | LOF        | 0.859    | 0.046        | 0.095    |  |
| KCNH2 | 99  | Y   | C   | NM_000238.4(KCNH2):c.296A>G (p.Tyr99Cys)   | not provided                                                                                    | Likely pathogenic(Last reviewed: Jan 21, 2020)                            | criteria provided, single submitter                  | VCV000200582 | 7                | 150974722      | 200582      | 197344      | rs199472854  | LOF        | 0.86     | 0.046        | 0.094    |  |
| KCNH2 | 99  | Y   | S   | NM_000238.4(KCNH2):c.296A>C (p.Tyr99Ser)   | Congenital long QT syndromel                                                                    | not provided                                                              | no assertion provided                                | VCV000067457 | 7                | 150974722      | 67457       | 78353       | rs199472854  | LOF        | 0.866    | 0.044        | 0.089    |  |
| KCNH2 | 100 | P   | L   | NM_000238.4(KCNH2):c.1319C>T (p.Pro440Leu) | Arrhythmia Congenital long QT syndromelnot provided                                             | Uncertain significance(Last reviewed: Apr 1, 2021)                        | criteria provided, multiple submitters, no conflicts | VCV000067185 | 7                | 150952663      | 67185       | 78081       | rs199473509  | LOF        | 0.792    | 0.099        | 0.109    |  |
| KCNH2 | 100 | R   | G   | NM_000238.4(KCNH2):c.298C>G (p.Arg100Gly)  | not provided Cardiovascular phenotypelCongenital long QT syndromelLong QT syndrome 2/3, digenic | Conflicting interpretations of pathogenicity(Last reviewed: Nov 28, 2017) | criteria provided, conflicting interpretations       | VCV000014442 | 7                | 150974720      | 14442       | 29481       | rs121912515  | LOF        | 0.822    | 0.075        | 0.103    |  |
| KCNH2 | 100 | R   | L   | NM_000238.4(KCNH2):c.299G>T (p.Arg100Leu)  | Long QT syndromel                                                                               | Uncertain significance(Last reviewed: Dec 28, 2018)                       | criteria provided, single submitter                  | VCV000657216 | 7                | 150974719      | 657216      | 635927      | rs199472855  | LOF        | 0.778    | 0.109        | 0.114    |  |
| KCNH2 | 100 | R   | Q   | NM_000238.4(KCNH2):c.299G>A (p.Arg100Gln)  | Congenital long QT syndromelnot providedlLong QT syndrome                                       | Conflicting interpretations of pathogenicity(Last reviewed: Jun 30, 2020) | criteria provided, conflicting interpretations       | VCV000067460 | 7                | 150974719      | 67460       | 78356       | rs199472855  | LOF        | 0.821    | 0.069        | 0.11     |  |
| KCNH2 | 100 | R   | W   | NM_000238.4(KCNH2):c.298C>T (p.Arg100Trp)  | Congenital long QT syndromelLong QT syndromel                                                   | Uncertain significance(Last reviewed: Oct 3, 2019)                        | criteria provided, single submitter                  | VCV000067459 | 7                | 150974720      | 67459       | 78355       | rs121912515  | LOF        | 0.78     | 0.102        | 0.118    |  |

| gene  | pos | aa1 | aa2 | Name                                       | Condition(s)                                                | Clinical significance (Last reviewed)                                     | Review status                                        | Accession    | GRCh38Chromosome | GRCh38Location | VariationID | AlleleID(s) | dbSNP ID     | prediction | prob.LOF | prob.Neutral | prob.GOF |
|-------|-----|-----|-----|--------------------------------------------|-------------------------------------------------------------|---------------------------------------------------------------------------|------------------------------------------------------|--------------|------------------|----------------|-------------|-------------|--------------|------------|----------|--------------|----------|
| KCNH2 | 101 | K   | E   | NM_000238.4(KCNH2):c.301A>G (p.Lys101Glu)  | Congenital long QT syndrome not provided Long QT syndrome   | Conflicting interpretations of pathogenicity(Last reviewed: Aug 22, 2020) | criteria provided, conflicting interpretations       | VCV000067462 | 7                | 150974717      | 67462       | 78358       | rs199472856  | LOF        | 0.805    | 0.042        | 0.153    |
| KCNH2 | 101 | K   | N   | NM_000238.4(KCNH2):c.303A>T (p.Lys101Asn)  | not provided                                                | Pathogenic(Last reviewed: Apr 28, 2014)                                   | criteria provided, single submitter                  | VCV000200590 | 7                | 150974715      | 200590      | 197342      | rs794728417  | LOF        | 0.807    | 0.046        | 0.147    |
| KCNH2 | 101 | K   | R   | NM_000238.4(KCNH2):c.302A>G (p.Lys101Arg)  | not provided                                                | Uncertain significance(Last reviewed: Feb 15, 2021)                       | criteria provided, single submitter                  | VCV001256427 | 7                | 150974716      | 1256427     | 1246356     | NA           | LOF        | 0.777    | 0.044        | 0.18     |
| KCNH2 | 102 | D   | A   | NM_000238.4(KCNH2):c.305A>C (p.Asp102Ala)  | Congenital long QT syndrome                                 | not provided                                                              | no assertion provided                                | VCV000067464 | 7                | 150974713      | 67464       | 78360       | rs199472857  | LOF        | 0.777    | 0.056        | 0.168    |
| KCNH2 | 102 | D   | V   | NM_000238.4(KCNH2):c.305A>T (p.Asp102Val)  | Congenital long QT syndrome                                 | not provided                                                              | no assertion provided                                | VCV000067465 | 7                | 150974713      | 67465       | 78361       | rs199472857  | LOF        | 0.761    | 0.064        | 0.175    |
| KCNH2 | 104 | E   | D   | NM_000238.4(KCNH2):c.1332G>T (p.Glu444Asp) | not provided                                                | not provided                                                              | no assertion provided                                | VCV000067188 | 7                | 150952650      | 67188       | 78084       | rs9770044    | LOF        | 0.779    | 0.061        | 0.16     |
| KCNH2 | 104 | E   | D   | NM_000238.4(KCNH2):c.1332G>T (p.Glu444Asp) | not provided                                                | not provided                                                              | no assertion provided                                | VCV000067188 | 7                | 150952650      | 67188       | 78084       | rs9770044    | LOF        | 0.779    | 0.061        | 0.16     |
| KCNH2 | 104 | E   | D   | NM_000238.4(KCNH2):c.1332G>C (p.Glu444Asp) | Arrhythmia                                                  | Uncertain significance(Last reviewed: Jul 25, 2019)                       | criteria provided, single submitter                  | VCV000927767 | 7                | 150952650      | 927767      | 910772      | rs9770044    | LOF        | 0.779    | 0.061        | 0.16     |
| KCNH2 | 104 | E   | D   | NM_000238.4(KCNH2):c.1332G>C (p.Glu444Asp) | Arrhythmia                                                  | Uncertain significance(Last reviewed: Jul 25, 2019)                       | criteria provided, single submitter                  | VCV000927767 | 7                | 150952650      | 927767      | 910772      | rs9770044    | LOF        | 0.779    | 0.061        | 0.16     |
| KCNH2 | 104 | E   | K   | NM_000238.4(KCNH2):c.1330G>A (p.Glu444Lys) | Arrhythmia Long QT syndrome Long QT syndrome 2 not provided | Uncertain significance(Last reviewed: Mar 24, 2021)                       | criteria provided, multiple submitters, no conflicts | VCV000191472 | 7                | 150952652      | 191472      | 189262      | rs201268831  | LOF        | 0.744    | 0.061        | 0.195    |
| KCNH2 | 104 | S   | R   | NM_000238.4(KCNH2):c.312C>G (p.Ser104Arg)  | Long QT syndrome                                            | Uncertain significance(Last reviewed: Nov 18, 2017)                       | criteria provided, single submitter                  | VCV000527024 | 7                | 150959732      | 527024      | 522474      | rs1554428245 | LOF        | 0.734    | 0.068        | 0.199    |
| KCNH2 | 106 | F   | L   | NM_000238.4(KCNH2):c.318C>A (p.Phe106Leu)  | Congenital long QT syndrome                                 | not provided                                                              | no assertion provided                                | VCV000067478 | 7                | 150959726      | 67478       | 78374       | rs199473497  | LOF        | 0.862    | 0.047        | 0.091    |
| KCNH2 | 106 | F   | Y   | NM_000238.4(KCNH2):c.317T>A (p.Phe106Tyr)  | Congenital long QT syndrome                                 | not provided                                                              | no assertion provided                                | VCV000067477 | 7                | 150959727      | 67477       | 78373       | rs199472858  | LOF        | 0.869    | 0.046        | 0.084    |
| KCNH2 | 108 | A   | S   | NM_000238.4(KCNH2):c.1342G>T (p.Ala448Ser) | Arrhythmia Long QT syndrome 2 Long QT syndrome              | Conflicting interpretations of pathogenicity(Last reviewed: Oct 26, 2020) | criteria provided, conflicting interpretations       | VCV000448973 | 7                | 150952640      | 448973      | 442552      | rs767723985  | LOF        | 0.87     | 0.045        | 0.085    |
| KCNH2 | 108 | A   | T   | NM_000238.4(KCNH2):c.1342G>A (p.Ala448Thr) | Arrhythmia                                                  | Uncertain significance(Last reviewed: Nov 4, 2019)                        | criteria provided, single submitter                  | VCV000924051 | 7                | 150952640      | 924051      | 910771      | rs767723985  | LOF        | 0.87     | 0.044        | 0.086    |
| KCNH2 | 108 | C   | R   | NM_000238.4(KCNH2):c.322T>C (p.Cys108Arg)  | Long QT syndrome Congenital long QT syndrome                | Uncertain significance(Last reviewed: Jan 30, 2019)                       | criteria provided, single submitter                  | VCV000067482 | 7                | 150959722      | 67482       | 78378       | rs199472859  | LOF        | 0.862    | 0.054        | 0.084    |
| KCNH2 | 109 | L   | R   | NM_000238.4(KCNH2):c.326T>G (p.Leu109Arg)  | Long QT syndrome 2 not provided                             | Benign(Last reviewed: May 28, 2019)                                       | criteria provided, single submitter                  | VCV000067484 | 7                | 150959718      | 67484       | 78380       | rs199473498  | LOF        | 0.866    | 0.05         | 0.084    |
| KCNH2 | 111 | D   | N   | NM_000238.4(KCNH2):c.331G>A (p.Asp111Asn)  | Arrhythmia                                                  | Uncertain significance(Last reviewed: Aug 21,                             | criteria provided, single submitter                  | VCV000921508 | 7                | 150959713      | 921508      | 910797      | rs1801502139 | LOF        | 0.868    | 0.052        | 0.079    |

| gene  | pos | aa1 | aa2 | Name                                       | Condition(s)                                                                | Clinical significance (Last reviewed)                                     | Review status                                        | Accession     | GRCh38Chromosome | GRCh38Location | VariationID | AlleleID(s) | dbSNP ID     | prediction | prob.LOF | prob.Neutral | prob.GOF |
|-------|-----|-----|-----|--------------------------------------------|-----------------------------------------------------------------------------|---------------------------------------------------------------------------|------------------------------------------------------|---------------|------------------|----------------|-------------|-------------|--------------|------------|----------|--------------|----------|
|       |     |     |     |                                            |                                                                             | 2019)                                                                     |                                                      |               |                  |                |             |             |              |            |          |              |          |
| KCNH2 | 111 | D   | V   | NM_000238.4(KCNH2):c.332A>T (p.Asp111Val)  | Congenital long QT syndrome                                                 | not provided                                                              | no assertion provided                                | VCV000067489  | 7                | 150959712      | 67489       | 78385       | rs199472860  | LOF        | 0.87     | 0.053        | 0.077    |
| KCNH2 | 111 | P   | L   | NM_000238.4(KCNH2):c.1352C>T (p.Pro451Leu) | Long QT syndrome Long QT syndrome 2  Congenital long QT syndrome Arrhythmia | Conflicting interpretations of pathogenicity(Last reviewed: Mar 23, 2021) | criteria provided, conflicting interpretations       | VCV000067190  | 7                | 150952630      | 67190       | 78086       | rs199472902  | LOF        | 0.873    | 0.051        | 0.076    |
| KCNH2 | 113 | A   | T   | NM_000238.4(KCNH2):c.1357G>A (p.Ala453Thr) | Arrhythmia                                                                  | Uncertain significance(Last reviewed: Mar 24, 2020)                       | criteria provided, single submitter                  | VCV0000919895 | 7                | 150952625      | 919895      | 910770      | rs1801221411 | LOF        | 0.869    | 0.044        | 0.087    |
| KCNH2 | 114 | P   | S   | NM_000238.4(KCNH2):c.340C>T (p.Pro114Ser)  | Congenital long QT syndrome                                                 | not provided                                                              | no assertion provided                                | VCV000067494  | 7                | 150959704      | 67494       | 78390       | rs199472861  | LOF        | 0.875    | 0.048        | 0.077    |
| KCNH2 | 115 | V   | G   | NM_000238.4(KCNH2):c.344T>G (p.Val115Gly)  | not provided                                                                | Pathogenic(Last reviewed: Apr 10, 2014)                                   | criteria provided, single submitter                  | VCV000200276  | 7                | 150959700      | 200276      | 197339      | rs794728351  | LOF        | 0.873    | 0.05         | 0.077    |
| KCNH2 | 115 | V   | M   | NM_000238.4(KCNH2):c.343G>A (p.Val115Met)  | Long QT syndrome Congenital long QT syndrome Long QT syndrome 2             | Uncertain significance(Last reviewed: Sep 25, 2020)                       | criteria provided, single submitter                  | VCV000067496  | 7                | 150959701      | 67496       | 78392       | rs150988911  | LOF        | 0.871    | 0.046        | 0.083    |
| KCNH2 | 116 | D   | Y   | NM_000238.4(KCNH2):c.1366G>T (p.Asp456Tyr) | Congenital long QT syndrome                                                 | not provided                                                              | no assertion provided                                | VCV000067191  | 7                | 150952616      | 67191       | 78087       | rs199473510  | LOF        | 0.862    | 0.06         | 0.078    |
| KCNH2 | 118 | E   | K   | NM_000238.4(KCNH2):c.352G>A (p.Glu118Lys)  | not provided                                                                | Uncertain significance(Last reviewed: Jun 1, 2017)                        | criteria provided, single submitter                  | VCV000810212  | 7                | 150959692      | 810212      | 795991      | rs746600107  | LOF        | 0.709    | 0.071        | 0.221    |
| KCNH2 | 118 | E   | Q   | NM_000238.4(KCNH2):c.352G>C (p.Glu118Gln)  | Long QT syndrome                                                            | Uncertain significance(Last reviewed: Jul 24, 2020)                       | criteria provided, single submitter                  | VCV001000649  | 7                | 150959692      | 1000649     | 992200      | rs746600107  | LOF        | 0.717    | 0.076        | 0.207    |
| KCNH2 | 119 | D   | H   | NM_000238.4(KCNH2):c.355G>C (p.Asp119His)  | Long QT syndrome not provided                                               | Uncertain significance(Last reviewed: Oct 31, 2019)                       | criteria provided, multiple submitters, no conflicts | VCV000405352  | 7                | 150959689      | 405352      | 396198      | rs376308069  | LOF        | 0.729    | 0.073        | 0.198    |
| KCNH2 | 120 | D   | Y   | NM_000238.4(KCNH2):c.1378G>T (p.Asp460Tyr) | Congenital long QT syndrome                                                 | not provided                                                              | no assertion provided                                | VCV000067192  | 7                | 150952604      | 67192       | 78088       | rs199472903  | LOF        | 0.783    | 0.087        | 0.129    |
| KCNH2 | 121 | A   | V   | NM_000238.4(KCNH2):c.362C>T (p.Ala121Val)  | Long QT syndrome                                                            | Uncertain significance(Last reviewed: Jul 8, 2020)                        | criteria provided, single submitter                  | VCV001054947  | 7                | 150959682      | 1054947     | 1044814     | NA           | LOF        | 0.73     | 0.16         | 0.11     |
| KCNH2 | 122 | M   | V   | NM_000238.4(KCNH2):c.1384A>G (p.Met462Val) | Long QT syndrome                                                            | Uncertain significance(Last reviewed: Oct 28, 2020)                       | criteria provided, single submitter                  | VCV001002624  | 7                | 150952598      | 1002624     | 992198      | rs1801220156 | LOF        | 0.864    | 0.047        | 0.089    |
| KCNH2 | 123 | F   | L   | NM_000238.4(KCNH2):c.1387T>C (p.Phe463Leu) | Congenital long QT syndrome                                                 | not provided                                                              | no assertion provided                                | VCV000067193  | 7                | 150952595      | 67193       | 78089       | rs199472904  | LOF        | 0.86     | 0.048        | 0.092    |
| KCNH2 | 124 | I   | T   | NM_000238.4(KCNH2):c.1391T>C (p.Ile464Thr) | Arrhythmia                                                                  | Uncertain significance(Last reviewed: Dec 10, 2018)                       | criteria provided, single submitter                  | VCV0000919164 | 7                | 150952591      | 919164      | 910769      | rs1801219752 | LOF        | 0.861    | 0.044        | 0.095    |
| KCNH2 | 124 | M   | R   | NM_000238.4(KCNH2):c.371T>G (p.Met124Arg)  | Congenital long QT syndrome                                                 | not provided                                                              | no assertion provided                                | VCV000067501  | 7                | 150959673      | 67501       | 78397       | rs199472862  | LOF        | 0.857    | 0.048        | 0.096    |
| KCNH2 | 124 | M   | T   | NM_000238.4(KCNH2):c.371T>C (p.Met124Thr)  | Congenital long QT syndrome                                                 | not provided                                                              | no assertion provided                                | VCV000067500  | 7                | 150959673      | 67500       | 78396       | rs199472862  | LOF        | 0.861    | 0.045        | 0.095    |
| KCNH2 | 125 | F   | C   | NM_000238.4(KCNH2):c.374T>G (p.Phe125Cys)  | Congenital long QT syndrome Cardiovascular phenotype                        | Uncertain significance(Last reviewed: Aug 5, 2015)                        | criteria provided, single submitter                  | VCV000067502  | 7                | 150959670      | 67502       | 78398       | rs199473499  | LOF        | 0.862    | 0.046        | 0.092    |

| gene  | pos | aa1 | aa2 | Name                                       | Condition(s)                                            | Clinical significance (Last reviewed)               | Review status                                        | Accession    | GRCh38Chromosome | GRCh38Location | VariationID | AlleleID(s) | dbSNP ID     | prediction | prob.LOF | prob.Neutral | prob.GOF |
|-------|-----|-----|-----|--------------------------------------------|---------------------------------------------------------|-----------------------------------------------------|------------------------------------------------------|--------------|------------------|----------------|-------------|-------------|--------------|------------|----------|--------------|----------|
| KCNH2 | 125 | F   | L   | NM_000238.4(KCNH2):c.373T>C (p.Phe125Leu)  | Long QT syndrome                                        | Uncertain significance(Last reviewed: May 30, 2019) | criteria provided, single submitter                  | VCV000934591 | 7                | 150959671      | 934591      | 933784      | rs1801500008 | LOF        | 0.861    | 0.047        | 0.092    |
| KCNH2 | 125 | V   | A   | NM_000238.4(KCNH2):c.1394T>C (p.Val465Ala) | Hypertrophic cardiomyopathy/Arrhythmia                  | Uncertain significance(Last reviewed: Jan 8, 2014)  | criteria provided, single submitter                  | VCV000374073 | 7                | 150952588      | 374073      | 360890      | rs1057518876 | LOF        | 0.867    | 0.044        | 0.089    |
| KCNH2 | 126 | D   | Y   | NM_000238.4(KCNH2):c.1396G>T (p.Asp466Tyr) | Congenital long QT syndrome                             | not provided                                        | no assertion provided                                | VCV000067194 | 7                | 150952586      | 67194       | 78090       | rs199473511  | LOF        | 0.875    | 0.05         | 0.076    |
| KCNH2 | 126 | I   | N   | NM_000238.4(KCNH2):c.377T>A (p.Ile126Asn)  | Long QT syndrome                                        | Uncertain significance(Last reviewed: Jan 19, 2019) | criteria provided, single submitter                  | VCV000859531 | 7                | 150959667      | 859531      | 833361      | rs1801499760 | LOF        | 0.867    | 0.045        | 0.089    |
| KCNH2 | 127 | L   | F   | NM_000238.4(KCNH2):c.379C>T (p.Leu127Phe)  | not provided                                            | Likely pathogenic(Last reviewed: Feb 4, 2014)       | criteria provided, single submitter                  | VCV000200278 | 7                | 150959665      | 200278      | 197336      | rs794728352  | LOF        | 0.871    | 0.046        | 0.083    |
| KCNH2 | 128 | N   | S   | NM_000238.4(KCNH2):c.383A>G (p.Asn128Ser)  | Long QT syndrome not provided                           | Uncertain significance(Last reviewed: Apr 14, 2017) | criteria provided, multiple submitters, no conflicts | VCV000191473 | 7                | 150959661      | 191473      | 189263      | rs200343670  | LOF        | 0.87     | 0.049        | 0.081    |
| KCNH2 | 129 | F   | L   | NM_000238.4(KCNH2):c.387C>G (p.Phe129Leu)  | not provided                                            | Likely pathogenic(Last reviewed: Nov 7, 2019)       | criteria provided, single submitter                  | VCV000200280 | 7                | 150959657      | 200280      | 197335      | rs764831888  | LOF        | 0.861    | 0.047        | 0.092    |
| KCNH2 | 130 | E   | K   | NM_000238.4(KCNH2):c.388G>A (p.Glu130Lys)  | Long QT syndrome Arrhythmia Congenital long QT syndrome | Uncertain significance(Last reviewed: Jun 29, 2021) | criteria provided, multiple submitters, no conflicts | VCV000067503 | 7                | 150959656      | 67503       | 78399       | rs199472863  | LOF        | 0.859    | 0.055        | 0.086    |
| KCNH2 | 131 | V   | L   | NM_000238.4(KCNH2):c.391G>T (p.Val131Leu)  | not provided Long QT syndrome Arrhythmia                | Uncertain significance(Last reviewed: Feb 2, 2021)  | criteria provided, multiple submitters, no conflicts | VCV000927974 | 7                | 150959653      | 927974      | 910795      | rs142590566  | LOF        | 0.869    | 0.047        | 0.084    |
| KCNH2 | 131 | V   | M   | NM_000238.4(KCNH2):c.391G>A (p.Val131Met)  | Arrhythmia                                              | Uncertain significance(Last reviewed: Aug 20, 2019) | criteria provided, single submitter                  | VCV000920295 | 7                | 150959653      | 920295      | 910796      | rs142590566  | LOF        | 0.871    | 0.044        | 0.085    |
| KCNH2 | 132 | R   | P   | NM_000238.4(KCNH2):c.1415G>C (p.Arg472Pro) | not provided                                            | Likely pathogenic(Last reviewed: Jun 8, 2012)       | criteria provided, single submitter                  | VCV000200340 | 7                | 150952567      | 200340      | 197281      | rs794728369  | LOF        | 0.815    | 0.095        | 0.09     |
| KCNH2 | 133 | M   | T   | NM_000238.4(KCNH2):c.398T>C (p.Met133Thr)  | Long QT syndrome Long QT syndrome 2 not provided        | Uncertain significance(Last reviewed: Oct 14, 2019) | criteria provided, multiple submitters, no conflicts | VCV000200282 | 7                | 150959646      | 200282      | 197334      | rs794728353  | Neutral    | 0.683    | 0.216        | 0.101    |
| KCNH2 | 133 | T   | I   | NM_000238.4(KCNH2):c.1418C>T (p.Thr473Ile) | not specified                                           | Likely pathogenic(Last reviewed: Jul 24, 2018)      | criteria provided, single submitter                  | VCV000811073 | 7                | 150952564      | 811073      | 799503      | rs199472905  | Neutral    | 0.626    | 0.279        | 0.095    |
| KCNH2 | 133 | T   | N   | NM_000238.4(KCNH2):c.1418C>A (p.Thr473Asn) | Congenital long QT syndrome                             | not provided                                        | no assertion provided                                | VCV000067197 | 7                | 150952564      | 67197       | 78093       | rs199472905  | Neutral    | 0.716    | 0.182        | 0.102    |
| KCNH2 | 133 | T   | P   | NM_000238.4(KCNH2):c.1417A>C (p.Thr473Pro) | Congenital long QT syndrome not provided                | Likely pathogenic(Last reviewed: Sep 7, 2021)       | no assertion criteria provided                       | VCV000067196 | 7                | 150952565      | 67196       | 78092       | rs199473512  | Neutral    | 0.736    | 0.17         | 0.093    |
| KCNH2 | 134 | T   | I   | NM_000238.4(KCNH2):c.1421C>T               | Congenital long QT syndrome not provided                | Pathogenic(Last reviewed: Jul 24, 2018)             | criteria provided, single submitter                  | VCV000067198 | 7                | 150952561      | 67198       | 78094       | rs199472906  | Neutral    | 0.426    | 0.471        | 0.103    |

| gene  | pos | aa1 | aa2 | Name                                       | Condition(s)                                                                                                                   | Clinical significance (Last reviewed)                                     | Review status                                        | Accession    | GRCh38Chromosome | GRCh38Location | VariationID | AlleleID(s) | dbSNP ID     | prediction | prob.LOF | prob.Neutral | prob.GOF |
|-------|-----|-----|-----|--------------------------------------------|--------------------------------------------------------------------------------------------------------------------------------|---------------------------------------------------------------------------|------------------------------------------------------|--------------|------------------|----------------|-------------|-------------|--------------|------------|----------|--------------|----------|
|       |     |     |     | (p.Thr474Ile)                              |                                                                                                                                | reviewed: Oct 10, 2014)                                                   | provided, single submitter                           |              |                  |                |             |             |              |            |          |              |          |
| KCNH2 | 135 | Y   | C   | NM_000238.4(KCNH2):c.1424A>G (p.Tyr475Cys) | Congenital long QT syndrome                                                                                                    | not provided                                                              | no assertion provided                                | VCV000067199 | 7                | 150952558      | 67199       | 78095       | rs199472907  | Neutral    | 0.452    | 0.378        | 0.17     |
| KCNH2 | 136 | V   | I   | NM_000238.4(KCNH2):c.1426G>A (p.Val476Ile) | Congenital long QT syndrome Long QT syndrome not specified Arrhythmia                                                          | Uncertain significance(Last reviewed: Apr 13, 2021)                       | criteria provided, multiple submitters, no conflicts | VCV000067200 | 7                | 150952556      | 67200       | 78096       | rs199472908  | Neutral    | 0.462    | 0.384        | 0.154    |
| KCNH2 | 137 | M   | V   | NM_000238.4(KCNH2):c.409A>G (p.Met137Val)  | Short QT syndrome 1                                                                                                            | Uncertain significance(Last reviewed: Mar 16, 2020)                       | criteria provided, single submitter                  | VCV000930960 | 7                | 150959635      | 930960      | 919088      | rs1801498381 | Neutral    | 0.397    | 0.438        | 0.165    |
| KCNH2 | 139 | G   | A   | NM_000238.4(KCNH2):c.416G>C (p.Gly139Ala)  | Long QT syndrome                                                                                                               | Uncertain significance(Last reviewed: Feb 27, 2020)                       | criteria provided, single submitter                  | VCV001018296 | 7                | 150959628      | 1018296     | 1007358     | rs1451114925 | Neutral    | 0.431    | 0.293        | 0.277    |
| KCNH2 | 141 | P   | L   | NM_000238.4(KCNH2):c.422C>T (p.Pro141Leu)  | Long QT syndrome Hypertrophic cardiomyopathy Arrhythmia Cardiovascular phenotype not provided not specified Long QT syndrome 2 | Conflicting interpretations of pathogenicity(Last reviewed: Feb 25, 2021) | criteria provided, conflicting interpretations       | VCV000067504 | 7                | 150959622      | 67504       | 78400       | rs199472864  | Neutral    | 0.404    | 0.365        | 0.23     |
| KCNH2 | 141 | P   | S   | NM_000238.4(KCNH2):c.421C>T (p.Pro141Ser)  | Long QT syndrome                                                                                                               | Uncertain significance(Last reviewed: Mar 4, 2020)                        | criteria provided, single submitter                  | VCV001045443 | 7                | 150959623      | 1045443     | 1027902     | rs1563172835 | Neutral    | 0.412    | 0.34         | 0.249    |
| KCNH2 | 142 | A   | T   | NM_000238.4(KCNH2):c.424G>A (p.Ala142Thr)  | Long QT syndrome                                                                                                               | Uncertain significance(Last reviewed: Jul 29, 2020)                       | criteria provided, single submitter                  | VCV001025220 | 7                | 150959620      | 1025220     | 1007357     | rs767514448  | Neutral    | 0.392    | 0.408        | 0.2      |
| KCNH2 | 143 | V   | F   | NM_000238.4(KCNH2):c.1447G>T (p.Val483Phe) | Long QT syndrome                                                                                                               | Uncertain significance(Last reviewed: Jun 24, 2019)                       | criteria provided, single submitter                  | VCV000949825 | 7                | 150952535      | 949825      | 924756      | rs755834128  | Neutral    | 0.422    | 0.417        | 0.161    |
| KCNH2 | 144 | D   | V   | NM_000238.4(KCNH2):c.431A>T (p.Asp144Val)  | Long QT syndrome Arrhythmia                                                                                                    | Conflicting interpretations of pathogenicity(Last reviewed: Sep 10, 2020) | criteria provided, conflicting interpretations       | VCV000526910 | 7                | 150959613      | 526910      | 522702      | rs146284716  | Neutral    | 0.358    | 0.337        | 0.305    |
| KCNH2 | 145 | T   | I   | NM_000238.4(KCNH2):c.434C>T (p.Thr145Ile)  | Long QT syndrome                                                                                                               | Uncertain significance(Last reviewed: Sep 24, 2020)                       | criteria provided, single submitter                  | VCV001047559 | 7                | 150959610      | 1047559     | 1027901     | rs1801497068 | Neutral    | 0.331    | 0.484        | 0.185    |
| KCNH2 | 147 | G   | A   | NM_000238.4(KCNH2):c.1460G>C (p.Gly487Ala) | Arrhythmia                                                                                                                     | Uncertain significance(Last reviewed: Feb 11, 2019)                       | criteria provided, single submitter                  | VCV000921335 | 7                | 150952522      | 921335      | 910766      | rs1801215399 | Neutral    | 0.418    | 0.286        | 0.297    |
| KCNH2 | 147 | G   | S   | NM_000238.4(KCNH2):c.1459G>A (p.Gly487Ser) | not specified Arrhythmia not provided Long QT syndrome                                                                         | Uncertain significance(Last reviewed: Oct 19, 2020)                       | criteria provided, multiple submitters, no conflicts | VCV000200342 | 7                | 150952523      | 200342      | 197279      | rs562875924  | GOF        | 0.424    | 0.255        | 0.321    |
| KCNH2 | 147 | H   | R   | NM_000238.4(KCNH2):c.440A>G (p.His147Arg)  | not provided Long QT syndrome Long QT syndrome 2 Short QT syndrome 1                                                           | Uncertain significance(Last reviewed: Dec 11, 2018)                       | criteria provided, multiple submitters, no conflicts | VCV000200285 | 7                | 150959604      | 200285      | 197333      | rs768938134  | GOF        | 0.443    | 0.229        | 0.328    |
| KCNH2 | 148 | R   | C   | NM_000238.4(KCNH2):c.1462C>T (p.Arg488Cys) | Arrhythmia Long QT syndrome                                                                                                    | Uncertain significance(Last reviewed: Mar 8, 2021)                        | criteria provided, multiple submitters, no conflicts | VCV001018981 | 7                | 150952520      | 1018981     | 1007351     | rs281865155  | Neutral    | 0.439    | 0.331        | 0.231    |



| gene  | pos | aa1 | aa2 | Name                                       | Condition(s)                                                                                                                         | Clinical significance (Last reviewed)                                    | Review status                                        | Accession    | GRCh38Chromosome | GRCh38Location | VariationID | AlleleID(s) | dbSNP ID     | prediction | prob.LOF | prob.Neutral | prob.GOF |
|-------|-----|-----|-----|--------------------------------------------|--------------------------------------------------------------------------------------------------------------------------------------|--------------------------------------------------------------------------|------------------------------------------------------|--------------|------------------|----------------|-------------|-------------|--------------|------------|----------|--------------|----------|
| KCNH2 | 148 | R   | Q   | NM_000238.4(KCNH2):c.443G>A (p.Arg148Gln)  | ArrhythmicLong QT syndrome not provided                                                                                              | Uncertain significance(Last reviewed: May 21, 2020)                      | criteria provided, multiple submitters, no conflicts | VCV000567306 | 7                | 150959601      | 567306      | 561406      | rs374912424  | Neutral    | 0.44     | 0.271        | 0.289    |
| KCNH2 | 148 | R   | W   | NM_000238.4(KCNH2):c.442C>T (p.Arg148Trp)  | Cardiovascular phenotype Conduction disorder of the heart not specified Long QT syndrome 2  Arrhythmic not provided Long QT syndrome | Conflicting interpretations of pathogenicity(Last reviewed: Dec 2, 2020) | criteria provided, conflicting interpretations       | VCV000067505 | 7                | 150959602      | 67505       | 78401       | rs139544114  | Neutral    | 0.42     | 0.357        | 0.223    |
| KCNH2 | 149 | G   | A   | NM_000238.4(KCNH2):c.446G>C (p.Gly149Ala)  | Congenital long QT syndrome Long QT syndrome 2 Short QT syndrome 1 Long QT syndrome                                                  | Uncertain significance(Last reviewed: Oct 31, 2018)                      | criteria provided, multiple submitters, no conflicts | VCV000067506 | 7                | 150959598      | 67506       | 78402       | rs199472865  | Neutral    | 0.496    | 0.267        | 0.237    |
| KCNH2 | 149 | G   | D   | NM_000238.4(KCNH2):c.446G>A (p.Gly149Asp)  | Long QT syndrome                                                                                                                     | Uncertain significance(Last reviewed: Apr 9, 2019)                       | criteria provided, single submitter                  | VCV000863779 | 7                | 150959598      | 863779      | 833360      | rs199472865  | GOF        | 0.556    | 0.184        | 0.26     |
| KCNH2 | 149 | I   | F   | NM_000238.4(KCNH2):c.1465A>T (p.Ile489Phe) | Congenital long QT syndrome                                                                                                          | not provided                                                             | no assertion provided                                | VCV000067201 | 7                | 150952517      | 67201       | 78097       | rs199472909  | Neutral    | 0.522    | 0.309        | 0.169    |
| KCNH2 | 150 | A   | P   | NM_000238.4(KCNH2):c.1468G>C (p.Ala490Pro) | Congenital long QT syndrome                                                                                                          | not provided                                                             | no assertion provided                                | VCV000067202 | 7                | 150952514      | 67202       | 78098       | rs28928905   | Neutral    | 0.53     | 0.266        | 0.204    |
| KCNH2 | 150 | P   | L   | NM_000238.4(KCNH2):c.449C>T (p.Pro150Leu)  | Arrhythmia                                                                                                                           | Uncertain significance(Last reviewed: Dec 15, 2020)                      | criteria provided, single submitter                  | VCV001171810 | 7                | 150959595      | 1171810     | 1160704     | NA           | Neutral    | 0.405    | 0.387        | 0.208    |
| KCNH2 | 150 | P   | S   | NM_000238.4(KCNH2):c.448C>T (p.Pro150Ser)  | Ventricular tachycardia                                                                                                              | Uncertain significance(Last reviewed: Nov 20, 2015)                      | criteria provided, single submitter                  | VCV000222667 | 7                | 150959596      | 222667      | 224346      | rs869025445  | Neutral    | 0.422    | 0.361        | 0.217    |
| KCNH2 | 151 | P   | A   | NM_000238.4(KCNH2):c.451C>G (p.Pro151Ala)  | Long QT syndrome 2 Short QT syndrome 1 not provided Arrhythmic Long QT syndrome                                                      | Uncertain significance(Last reviewed: Jun 8, 2020)                       | criteria provided, multiple submitters, no conflicts | VCV000405361 | 7                | 150959593      | 405361      | 396190      | rs1060500674 | Neutral    | 0.421    | 0.383        | 0.196    |
| KCNH2 | 151 | P   | S   | NM_000238.4(KCNH2):c.451C>T (p.Pro151Ser)  | Long QT syndrome                                                                                                                     | Uncertain significance(Last reviewed: Jul 20, 2020)                      | criteria provided, single submitter                  | VCV001026596 | 7                | 150959593      | 1026596     | 1007356     | rs1060500674 | Neutral    | 0.432    | 0.359        | 0.209    |
| KCNH2 | 151 | V   | I   | NM_000238.4(KCNH2):c.1471G>A (p.Val491Ile) | Arrhythmic not provided Long QT syndrome  Cardiovascular phenotype not specified                                                     | Likely benign(Last reviewed: Dec 4, 2020)                                | criteria provided, multiple submitters, no conflicts | VCV000200344 | 7                | 150952511      | 200344      | 197278      | rs374376640  | Neutral    | 0.467    | 0.36         | 0.173    |
| KCNH2 | 152 | H   | Y   | NM_000238.4(KCNH2):c.1474C>T (p.His492Tyr) | Long QT syndrome 2 Congenital long QT syndrome Arrhythmia                                                                            | Likely pathogenic(Last reviewed: Mar 18, 2020)                           | criteria provided, multiple submitters, no conflicts | VCV000067204 | 7                | 150952508      | 67204       | 78100       | rs199472910  | Neutral    | 0.393    | 0.395        | 0.212    |
| KCNH2 | 152 | T   | I   | NM_000238.4(KCNH2):c.455C>T (p.Thr152Ile)  | Long QT syndrome                                                                                                                     | Uncertain significance(Last reviewed: Sep 24, 2019)                      | criteria provided, single submitter                  | VCV000940899 | 7                | 150959589      | 940899      | 933783      | rs794728354  | Neutral    | 0.365    | 0.47         | 0.165    |
| KCNH2 | 152 | T   | S   | NM_000238.4(KCNH2):c.455C>G (p.Thr152Ser)  | Arrhythmic not provided                                                                                                              | Uncertain significance(Last reviewed: Jul 7, 2021)                       | criteria provided, multiple submitters, no conflicts | VCV000200288 | 7                | 150959589      | 200288      | 197331      | rs794728354  | Neutral    | 0.413    | 0.412        | 0.175    |
| KCNH2 | 153 | Y   | C   | NM_000238.4(KCNH2):c.1478A>G (p.Tyr493Cys) | Congenital long QT syndrome not provided Long QT syndrome                                                                            | Likely pathogenic(Last reviewed: Jan 15,                                 | criteria provided, multiple                          | VCV000067206 | 7                | 150952504      | 67206       | 78102       | rs199472911  | Neutral    | 0.495    | 0.355        | 0.15     |

| gene  | pos | aa1 | aa2 | Name                                       | Condition(s)                                                                       | Clinical significance (Last reviewed)                                    | Review status                                        | Accession     | GRCh38Chromosome | GRCh38Location | VariationID | AlleleID(s) | dbSNP ID     | prediction | prob.LOF | prob.Neutral | prob.GOF |
|-------|-----|-----|-----|--------------------------------------------|------------------------------------------------------------------------------------|--------------------------------------------------------------------------|------------------------------------------------------|---------------|------------------|----------------|-------------|-------------|--------------|------------|----------|--------------|----------|
|       |     |     |     |                                            |                                                                                    | 2021)                                                                    | submitters, no conflicts                             |               |                  |                |             |             |              |            |          |              |          |
| KCNH2 | 153 | Y   | F   | NM_000238.4(KCNH2):c.1478A>T (p.Tyr493Phe) | Congenital long QT syndrome                                                        | not provided                                                             | no assertion provided                                | VCV000067207  | 7                | 150952504      | 67207       | 78103       | rs199472911  | Neutral    | 0.477    | 0.382        | 0.141    |
| KCNH2 | 153 | Y   | S   | NM_000238.4(KCNH2):c.1478A>C (p.Tyr493Ser) | Congenital long QT syndrome                                                        | not provided                                                             | no assertion provided                                | VCV000067205  | 7                | 150952504      | 67205       | 78101       | rs199472911  | Neutral    | 0.517    | 0.338        | 0.145    |
| KCNH2 | 154 | W   | R   | NM_000238.4(KCNH2):c.460T>C (p.Trp154Arg)  | Arrhythmia                                                                         | Uncertain significance(Last reviewed: Aug 8, 2019)                       | criteria provided, single submitter                  | VCV0000628868 | 7                | 150959584      | 628868      | 617355      | rs747591865  | Neutral    | 0.637    | 0.2          | 0.163    |
| KCNH2 | 159 | L   | R   | NM_000238.4(KCNH2):c.1496T>G (p.Leu499Arg) | not specified not provided                                                         | Uncertain significance(Last reviewed: Feb 27, 2020)                      | criteria provided, single submitter                  | VCV000200346  | 7                | 150952486      | 200346      | 197277      | rs794728370  | Neutral    | 0.598    | 0.213        | 0.188    |
| KCNH2 | 160 | A   | S   | NM_000238.4(KCNH2):c.478G>T (p.Ala160Ser)  | Long QT syndrome                                                                   | Uncertain significance(Last reviewed: Nov 11, 2019)                      | criteria provided, single submitter                  | VCV000955775  | 7                | 150958497      | 955775      | 945530      | rs1210130846 | Neutral    | 0.53     | 0.335        | 0.136    |
| KCNH2 | 161 | D   | G   | NM_000238.4(KCNH2):c.1502A>G (p.Asp501Gly) | Congenital long QT syndrome not provided                                           | Pathogenic(Last reviewed: Aug 24, 2012)                                  | criteria provided, single submitter                  | VCV000067210  | 7                | 150952480      | 67210       | 78106       | rs199473513  | Neutral    | 0.527    | 0.317        | 0.156    |
| KCNH2 | 161 | D   | H   | NM_000238.4(KCNH2):c.1501G>C (p.Asp501His) | Congenital long QT syndrome                                                        | not provided                                                             | no assertion provided                                | VCV000067209  | 7                | 150952481      | 67209       | 78105       | rs199472912  | Neutral    | 0.479    | 0.36         | 0.161    |
| KCNH2 | 161 | D   | N   | NM_000238.4(KCNH2):c.1501G>A (p.Asp501Asn) | Congenital long QT syndrome not provided Long QT syndrome Cardiovascular phenotype | Pathogenic/Likely pathogenic(Last reviewed: Mar 22, 2019)                | criteria provided, multiple submitters, no conflicts | VCV000067208  | 7                | 150952481      | 67208       | 78104       | rs199472912  | Neutral    | 0.543    | 0.283        | 0.174    |
| KCNH2 | 164 | R   | H   | NM_000238.4(KCNH2):c.491G>A (p.Arg164His)  | Congenital long QT syndrome Long QT syndrome 2 Long QT syndrome                    | Uncertain significance(Last reviewed: Mar 1, 2020)                       | criteria provided, multiple submitters, no conflicts | VCV000067508  | 7                | 150958484      | 67508       | 78404       | rs199472866  | Neutral    | 0.619    | 0.221        | 0.16     |
| KCNH2 | 166 | I   | V   | NM_000238.4(KCNH2):c.1516A>G (p.Ile506Val) | Long QT syndrome                                                                   | Uncertain significance(Last reviewed: Nov 28, 2018)                      | criteria provided, single submitter                  | VCV000645833  | 7                | 150952466      | 645833      | 635911      | rs773139548  | Neutral    | 0.56     | 0.312        | 0.129    |
| KCNH2 | 167 | L   | V   | NM_000238.4(KCNH2):c.499C>G (p.Leu167Val)  | not specified                                                                      | Uncertain significance(Last reviewed: Mar 12, 2019)                      | criteria provided, single submitter                  | VCV000929250  | 7                | 150958476      | 929250      | 917005      | rs1801462947 | Neutral    | 0.645    | 0.253        | 0.102    |
| KCNH2 | 167 | P   | L   | NM_000238.4(KCNH2):c.1520C>T (p.Pro507Leu) | not provided                                                                       | Uncertain significance(Last reviewed: Oct 1, 2020)                       | criteria provided, single submitter                  | VCV000200352  | 7                | 150952462      | 200352      | 197275      | rs794728372  | Neutral    | 0.597    | 0.288        | 0.115    |
| KCNH2 | 167 | P   | S   | NM_000238.4(KCNH2):c.1519C>T (p.Pro507Ser) | not provided                                                                       | Uncertain significance(Last reviewed: Aug 25, 2017)                      | criteria provided, multiple submitters, no conflicts | VCV000200350  | 7                | 150952463      | 200350      | 197276      | rs794728371  | Neutral    | 0.65     | 0.249        | 0.101    |
| KCNH2 | 169 | D   | N   | NM_000238.4(KCNH2):c.1525G>A (p.Asp509Asn) | Long QT syndrome 2 Cardiovascular phenotype  Long QT syndrome                      | Conflicting interpretations of pathogenicity(Last reviewed: Jul 3, 2018) | criteria provided, conflicting interpretations       | VCV000200354  | 7                | 150952457      | 200354      | 197273      | rs370637245  | LOF        | 0.684    | 0.152        | 0.164    |
| KCNH2 | 172 | A   | V   | NM_000238.4(KCNH2):c.515C>T (p.Ala172Val)  | not provided                                                                       | Uncertain significance(Last reviewed: Nov 5, 2013)                       | criteria provided, single submitter                  | VCV000200290  | 7                | 150958460      | 200290      | 197329      | rs794728355  | Neutral    | 0.619    | 0.274        | 0.107    |
| KCNH2 | 173 | F   | L   | NM_000238.4(KCNH2):c.1537T>C (p.Phe513Leu) | Long QT syndrome                                                                   | Uncertain significance(Last reviewed: Last                               | criteria provided, single                            | VCV000567702  | 7                | 150952445      | 567702      | 564160      | rs1563159718 | Neutral    | 0.557    | 0.319        | 0.124    |

| gene  | pos | aa1 | aa2 | Name                                       | Condition(s)                                                                                                  | Clinical significance (Last reviewed)                                                 | Review status                                        | Accession    | GRCh38Chromosome | GRCh38Location | VariationID | AlleleID(s) | dbSNP ID     | prediction | prob.LOF | prob.Neutral | prob.GOF |
|-------|-----|-----|-----|--------------------------------------------|---------------------------------------------------------------------------------------------------------------|---------------------------------------------------------------------------------------|------------------------------------------------------|--------------|------------------|----------------|-------------|-------------|--------------|------------|----------|--------------|----------|
|       |     |     |     |                                            |                                                                                                               | reviewed: May 9, 2019)                                                                | submitter                                            |              |                  |                |             |             |              |            |          |              |          |
| KCNH2 | 175 | A   | D   | NM_000238.4(KCNH2):c.524C>A (p.Ala175Asp)  | Long QT syndrome 2 not specified Long QT syndrome                                                             | Likely benign(Last reviewed: Jul 31, 2019)                                            | criteria provided, multiple submitters, no conflicts | VCV000200211 | 7                | 150958451      | 200211      | 197328      | rs776541110  | Neutral    | 0.638    | 0.224        | 0.138    |
| KCNH2 | 175 | A   | S   | NM_000238.4(KCNH2):c.523G>T (p.Ala175Ser)  | Long QT syndrome                                                                                              | Uncertain significance(Last reviewed: Oct 3, 2019)                                    | criteria provided, single submitter                  | VCV000937283 | 7                | 150958452      | 937283      | 933782      | rs1296505812 | Neutral    | 0.555    | 0.327        | 0.118    |
| KCNH2 | 175 | A   | T   | NM_000238.4(KCNH2):c.523G>A (p.Ala175Thr)  | Long QT syndrome                                                                                              | Uncertain significance(Last reviewed: Feb 19, 2018)                                   | criteria provided, single submitter                  | VCV000571170 | 7                | 150958452      | 571170      | 561741      | rs1296505812 | Neutral    | 0.53     | 0.361        | 0.11     |
| KCNH2 | 176 | R   | Q   | NM_000238.4(KCNH2):c.527G>A (p.Arg176Gln)  | Long QT syndrome                                                                                              | Uncertain significance(Last reviewed: Jan 23, 2020)                                   | criteria provided, single submitter                  | VCV001010337 | 7                | 150958448      | 1010337     | 992199      | rs1164359840 | Neutral    | 0.472    | 0.328        | 0.2      |
| KCNH2 | 176 | R   | W   | NM_000238.4(KCNH2):c.526C>T (p.Arg176Trp)  | not specified not provided Long QT syndrome 2  Cardiovascular phenotype Long QT syndrome  Short QT syndrome 1 | Conflicting interpretations of pathogenicity, risk factor(Last reviewed: Feb 2, 2022) | criteria provided, conflicting interpretations       | VCV000067509 | 7                | 150958449      | 67509       | 78405       | rs36210422   | Neutral    | 0.42     | 0.404        | 0.176    |
| KCNH2 | 177 | E   | A   | NM_000238.4(KCNH2):c.530A>C (p.Glu177Ala)  | Long QT syndrome                                                                                              | Uncertain significance(Last reviewed: Aug 4, 2020)                                    | criteria provided, single submitter                  | VCV001045316 | 7                | 150958445      | 1045316     | 1027899     | rs1801461414 | Neutral    | 0.405    | 0.363        | 0.232    |
| KCNH2 | 179 | S   | A   | NM_000238.4(KCNH2):c.535T>G (p.Ser179Ala)  | Long QT syndrome                                                                                              | Uncertain significance(Last reviewed: Sep 25, 2020)                                   | criteria provided, single submitter                  | VCV001059858 | 7                | 150958440      | 1059858     | 1044813     | NA           | Neutral    | 0.439    | 0.404        | 0.156    |
| KCNH2 | 181 | R   | Q   | NM_000238.4(KCNH2):c.542G>A (p.Arg181Gln)  | not specified not provided Long QT syndrome  Cardiovascular phenotype                                         | Benign/Likely benign(Last reviewed: Nov 21, 2020)                                     | criteria provided, multiple submitters, no conflicts | VCV000067510 | 7                | 150958433      | 67510       | 78406       | rs41308954   | Neutral    | 0.397    | 0.328        | 0.275    |
| KCNH2 | 182 | G   | R   | NM_000238.4(KCNH2):c.1564G>A (p.Gly522Arg) | Arrhythmia Congenital long QT syndrome                                                                        | Uncertain significance(Last reviewed: Feb 21, 2020)                                   | criteria provided, single submitter                  | VCV000067212 | 7                | 150951829      | 67212       | 78108       | rs199473514  | GOF        | 0.483    | 0.2          | 0.317    |
| KCNH2 | 182 | S   | W   | NM_000238.4(KCNH2):c.545C>G (p.Ser182Trp)  | not provided Long QT syndrome                                                                                 | Uncertain significance(Last reviewed: Jun 24, 2019)                                   | criteria provided, single submitter                  | VCV000405351 | 7                | 150958430      | 405351      | 396186      | rs1057517742 | Neutral    | 0.411    | 0.367        | 0.222    |
| KCNH2 | 185 | K   | N   | NM_000238.4(KCNH2):c.1575G>T (p.Lys525Asn) | Congenital long QT syndrome                                                                                   | not provided                                                                          | no assertion provided                                | VCV000067213 | 7                | 150951818      | 67213       | 78109       | rs199472913  | Neutral    | 0.386    | 0.408        | 0.207    |
| KCNH2 | 186 | T   | A   | NM_000238.4(KCNH2):c.1576A>G (p.Thr526Ala) | Long QT syndrome                                                                                              | Uncertain significance(Last reviewed: Oct 15, 2020)                                   | criteria provided, single submitter                  | VCV001038284 | 7                | 150951817      | 1038284     | 1027890     | rs1801183927 | Neutral    | 0.354    | 0.462        | 0.184    |
| KCNH2 | 187 | G   | S   | NM_000238.4(KCNH2):c.559G>A (p.Gly187Ser)  | not provided                                                                                                  | not provided                                                                          | no assertion provided                                | VCV000067511 | 7                | 150958416      | 67511       | 78407       | rs199472867  | Neutral    | 0.45     | 0.284        | 0.265    |
| KCNH2 | 188 | A   | T   | NM_000238.4(KCNH2):c.562G>A (p.Ala188Thr)  | Long QT syndrome                                                                                              | Uncertain significance(Last reviewed: Mar 25, 2020)                                   | criteria provided, single submitter                  | VCV001035380 | 7                | 150958413      | 1035380     | 1027898     | rs1273532552 | Neutral    | 0.379    | 0.389        | 0.232    |
| KCNH2 | 188 | A   | V   | NM_000238.4(KCNH2):c.563C>T (p.Ala188Val)  | not provided Long QT syndrome                                                                                 | Uncertain significance(Last reviewed: Aug 9, 2020)                                    | criteria provided, multiple submitters, no           | VCV000200293 | 7                | 150958412      | 200293      | 197326      | rs794728356  | Neutral    | 0.367    | 0.408        | 0.224    |

| gene  | pos | aa1 | aa2 | Name                                       | Condition(s)                                                                        | Clinical significance (Last reviewed)                                     | Review status                                        | Accession    | GRCh38Chromosome | GRCh38Location | VariationID | AlleleID(s) | dbSNP ID     | prediction | prob.LOF | prob.Neutral | prob.GOF |
|-------|-----|-----|-----|--------------------------------------------|-------------------------------------------------------------------------------------|---------------------------------------------------------------------------|------------------------------------------------------|--------------|------------------|----------------|-------------|-------------|--------------|------------|----------|--------------|----------|
|       |     |     |     |                                            |                                                                                     |                                                                           | conflicts                                            |              |                  |                |             |             |              |            |          |              |          |
| KCNH2 | 188 | R   | P   | NM_000238.4(KCNH2):c.1583G>C (p.Arg528Pro) | Congenital long QT syndrome                                                         | not provided                                                              | no assertion provided                                | VCV000067216 | 7                | 150951810      | 67216       | 78112       | rs199472914  | Neutral    | 0.439    | 0.324        | 0.236    |
| KCNH2 | 188 | R   | W   | NM_000238.4(KCNH2):c.1582C>T (p.Arg528Trp) | Arrhythmia Long QT syndrome                                                         | Uncertain significance(Last reviewed: Oct 30, 2018)                       | criteria provided, multiple submitters, no conflicts | VCV000220162 | 7                | 150951811      | 220162      | 221673      | rs864622403  | Neutral    | 0.381    | 0.41         | 0.209    |
| KCNH2 | 189 | G   | V   | NM_000238.4(KCNH2):c.566G>T (p.Gly189Val)  | Long QT syndrome 2                                                                  | Uncertain significance(Last reviewed: Dec 4, 2018)                        | criteria provided, single submitter                  | VCV000637978 | 7                | 150958409      | 637978      | 625802      | rs1584866229 | Neutral    | 0.447    | 0.319        | 0.234    |
| KCNH2 | 190 | A   | T   | NM_000238.4(KCNH2):c.568G>A (p.Ala190Thr)  | Long QT syndrome not specified not provided  Long QT syndrome 2 Short QT syndrome 1 | Conflicting interpretations of pathogenicity(Last reviewed: Oct 14, 2020) | criteria provided, conflicting interpretations       | VCV000067512 | 7                | 150958407      | 67512       | 78408       | rs150817714  | Neutral    | 0.475    | 0.364        | 0.162    |
| KCNH2 | 191 | P   | L   | NM_000238.4(KCNH2):c.572C>T (p.Pro191Leu)  | Long QT syndrome                                                                    | Uncertain significance(Last reviewed: Feb 11, 2020)                       | criteria provided, single submitter                  | VCV001027196 | 7                | 150958403      | 1027196     | 1007355     | rs1345107784 | Neutral    | 0.373    | 0.436        | 0.191    |
| KCNH2 | 191 | R   | Q   | NM_000238.4(KCNH2):c.1592G>A (p.Arg531Gln) | Congenital long QT syndrome                                                         | not provided                                                              | no assertion provided                                | VCV000067219 | 7                | 150951801      | 67219       | 78115       | rs199473515  | Neutral    | 0.418    | 0.368        | 0.214    |
| KCNH2 | 191 | R   | W   | NM_000238.4(KCNH2):c.1591C>T (p.Arg531Trp) | Congenital long QT syndrome not specified not provided Long QT syndrome             | Conflicting interpretations of pathogenicity(Last reviewed: Aug 24, 2021) | criteria provided, conflicting interpretations       | VCV000067218 | 7                | 150951802      | 67218       | 78114       | rs199472915  | Neutral    | 0.375    | 0.444        | 0.181    |
| KCNH2 | 192 | L   | P   | NM_000238.4(KCNH2):c.1595T>C (p.Leu532Pro) | Long QT syndrome 1                                                                  | Likely pathogenic(Last reviewed: Jan 8, 2019)                             | criteria provided, single submitter                  | VCV000978356 | 7                | 150951798      | 978356      | 966439      | rs1801182500 | Neutral    | 0.694    | 0.194        | 0.112    |
| KCNH2 | 193 | A   | V   | NM_000238.4(KCNH2):c.578C>T (p.Ala193Val)  | not provided                                                                        | Uncertain significance(Last reviewed: Jul 17, 2019)                       | criteria provided, single submitter                  | VCV001304544 | 7                | 150958397      | 1304544     | 1294819     | NA           | Neutral    | 0.513    | 0.383        | 0.104    |
| KCNH2 | 193 | V   | G   | NM_000238.4(KCNH2):c.1598T>G (p.Val533Gly) | not specified                                                                       | Benign(Last reviewed: Jun 24, 2013)                                       | criteria provided, single submitter                  | VCV000191574 | 7                | 150951795      | 191574      | 189261      | rs202102276  | Neutral    | 0.657    | 0.238        | 0.105    |
| KCNH2 | 193 | V   | L   | NM_000238.4(KCNH2):c.1597G>C (p.Val533Leu) | Arrhythmia                                                                          | Uncertain significance(Last reviewed: Mar 16, 2021)                       | criteria provided, single submitter                  | VCV001332036 | 7                | 150951796      | 1332036     | 1322756     | NA           | Neutral    | 0.547    | 0.341        | 0.112    |
| KCNH2 | 194 | R   | C   | NM_000238.4(KCNH2):c.1600C>T (p.Arg534Cys) | Congenital long QT syndrome not provided Long QT syndrome                           | Pathogenic(Last reviewed: Oct 24, 2020)                                   | criteria provided, multiple submitters, no conflicts | VCV000067220 | 7                | 150951793      | 67220       | 78116       | rs199472916  | Neutral    | 0.515    | 0.351        | 0.134    |
| KCNH2 | 194 | R   | G   | NM_000238.4(KCNH2):c.1600C>G (p.Arg534Gly) | Long QT syndrome 2                                                                  | Uncertain significance(Last reviewed: Apr 27, 2017)                       | criteria provided, single submitter                  | VCV000908910 | 7                | 150951793      | 908910      | 897671      | rs199472916  | Neutral    | 0.599    | 0.275        | 0.126    |
| KCNH2 | 194 | R   | L   | NM_000238.4(KCNH2):c.1601G>T (p.Arg534Leu) | Congenital long QT syndrome Long QT syndrome                                        | Uncertain significance(Last reviewed: Feb 22, 2020)                       | criteria provided, single submitter                  | VCV000067221 | 7                | 150951792      | 67221       | 78117       | rs199473516  | Neutral    | 0.482    | 0.394        | 0.124    |
| KCNH2 | 194 | R   | S   | NM_000238.4(KCNH2):c.1600C>A (p.Arg534Ser) | Long QT syndrome not provided                                                       | Conflicting interpretations of pathogenicity(Last reviewed: Jul 23, 2018) | criteria provided, conflicting interpretations       | VCV000200728 | 7                | 150951793      | 200728      | 197270      | rs199472916  | Neutral    | 0.539    | 0.346        | 0.114    |

| gene  | pos | aa1 | aa2 | Name                                               | Condition(s)                                                              | Clinical significance (Last reviewed)               | Review status                                        | Accession    | GRCh38Chromosome | GRCh38Location        | VariationID | AlleleID(s) | dbSNP ID     | prediction | prob.LOF | prob.Neutral | prob.GOF |
|-------|-----|-----|-----|----------------------------------------------------|---------------------------------------------------------------------------|-----------------------------------------------------|------------------------------------------------------|--------------|------------------|-----------------------|-------------|-------------|--------------|------------|----------|--------------|----------|
| KCNH2 | 194 | V   | M   | NM_000238.4(KCNH2):c.580G>A (p.Val194Met)          | not provided Long QT syndrome                                             | Uncertain significance(Last reviewed: Jun 25, 2019) | criteria provided, multiple submitters, no conflicts | VCV000640808 | 7                | 150958395             | 640808      | 635926      | rs1293129095 | Neutral    | 0.552    | 0.346        | 0.101    |
| KCNH2 | 195 | V   | L   | NM_000238.4(KCNH2):c.1603G>T (p.Val535Leu)         | Long QT syndrome                                                          | Uncertain significance(Last reviewed: Jun 14, 2018) | criteria provided, single submitter                  | VCV000570842 | 7                | 150951790             | 570842      | 561728      | rs375872367  | Neutral    | 0.486    | 0.389        | 0.125    |
| KCNH2 | 195 | V   | M   | NM_000238.4(KCNH2):c.1603G>A (p.Val535Met)         | not provided Long QT syndrome 2 Long QT syndrome Cardiovascular phenotype | Uncertain significance(Last reviewed: Apr 15, 2019) | criteria provided, multiple submitters, no conflicts | VCV000161256 | 7                | 150951790             | 161256      | 171108      | rs375872367  | Neutral    | 0.465    | 0.419        | 0.115    |
| KCNH2 | 197 | D   | N   | NM_000238.4(KCNH2):c.589G>A (p.Asp197Asn)          | Long QT syndrome                                                          | Uncertain significance(Last reviewed: Jul 31, 2019) | criteria provided, single submitter                  | VCV000952715 | 7                | 150958386             | 952715      | 924759      | rs1396987764 | Neutral    | 0.449    | 0.325        | 0.226    |
| KCNH2 | 197 | R   | Q   | NM_000238.4(KCNH2):c.1610G>A (p.Arg537Gln)         | not provided                                                              | Likely pathogenic(Last reviewed: Dec 30, 2016)      | criteria provided, single submitter                  | VCV000200360 | 7                | 150951783             | 200360      | 197269      | rs794728373  | Neutral    | 0.401    | 0.41         | 0.189    |
| KCNH2 | 197 | R   | W   | NM_000238.4(KCNH2):c.1609C>T (p.Arg537Trp)         | Arrhythmia Long QT syndrome Congenital long QT syndrome                   | Uncertain significance(Last reviewed: Apr 23, 2020) | criteria provided, multiple submitters, no conflicts | VCV000067222 | 7                | 150951784             | 67222       | 78118       | rs199472917  | Neutral    | 0.374    | 0.468        | 0.157    |
| KCNH2 | 198 | K   | E   | NM_000238.4(KCNH2):c.1612A>G (p.Lys538Glu)         | Long QT syndrome                                                          | Uncertain significance(Last reviewed: Jun 14, 2016) | criteria provided, single submitter                  | VCV000359311 | 7                | 150951781             | 359311      | 305392      | rs886062088  | Neutral    | 0.492    | 0.326        | 0.182    |
| KCNH2 | 201 | R   | H   | NM_000238.4(KCNH2):c.1622G>A (p.Arg541His)         | Arrhythmia Long QT syndrome                                               | Uncertain significance(Last reviewed: Jan 5, 2021)  | criteria provided, multiple submitters, no conflicts | VCV000960653 | 7                | 150951771             | 960653      | 945524      | rs1297393452 | Neutral    | 0.349    | 0.442        | 0.209    |
| KCNH2 | 201 | T   | M   | NM_000238.4(KCNH2):c.602C>T (p.Thr201Met)          | not provided                                                              | Uncertain significance(Last reviewed: Apr 23, 2013) | criteria provided, single submitter                  | VCV000200295 | 7                | 150958373             | 200295      | 197321      | rs794728357  | Neutral    | 0.277    | 0.549        | 0.174    |
| KCNH2 | 203 | A   | T   | NM_000238.4(KCNH2):c.607G>A (p.Ala203Thr)          | not provided Long QT syndrome Cardiovascular phenotype                    | Uncertain significance(Last reviewed: Aug 27, 2020) | criteria provided, multiple submitters, no conflicts | VCV000067514 | 7                | 150958368             | 67514       | 78410       | rs199472868  | Neutral    | 0.404    | 0.276        | 0.32     |
| KCNH2 | 205 | P   | L   | NM_000238.4(KCNH2):c.614C>T (p.Pro205Leu)          | Short QT syndrome 1                                                       | Uncertain significance(Last reviewed: Jun 25, 2019) | no assertion criteria provided                       | VCV000829864 | 7                | 150958361             | 829864      | 818254      | rs1326885330 | Neutral    | 0.399    | 0.369        | 0.233    |
| KCNH2 | 205 | P   | S   | NM_000238.4(KCNH2):c.613C>T (p.Pro205Ser)          | Long QT syndrome                                                          | Uncertain significance(Last reviewed: Sep 6, 2018)  | criteria provided, single submitter                  | VCV000662184 | 7                | 150958362             | 662184      | 635925      | rs939574819  | Neutral    | 0.401    | 0.344        | 0.255    |
| KCNH2 | 206 | S   | I   | NM_000238.4(KCNH2):c.617_618delinsTT (p.Ser206Ile) | not specified Long QT syndrome                                            | Uncertain significance(Last reviewed: Oct 12, 2020) | criteria provided, multiple submitters, no conflicts | VCV000405339 | 7                | 150958357 - 150958358 | 405339      | 395495      | rs1060500660 | Neutral    | 0.35     | 0.441        | 0.209    |
| KCNH2 | 207 | A   | V   | NM_000238.4(KCNH2):c.1640C>T (p.Ala547Val)         | Long QT syndrome Arrhythmia                                               | Uncertain significance(Last reviewed: Dec 3, 2019)  | criteria provided, multiple submitters, no           | VCV000852580 | 7                | 150951753             | 852580      | 833338      | rs1473812774 | Neutral    | 0.367    | 0.418        | 0.214    |

| gene  | pos | aa1 | aa2 | Name                                       | Condition(s)                                                                                           | Clinical significance (Last reviewed)               | Review status                                        | Accession    | GRCh38Chromosome | GRCh38Location | VariationID | AlleleID(s) | dbSNP ID     | prediction | prob.LOF | prob.Neutral | prob.GOF |
|-------|-----|-----|-----|--------------------------------------------|--------------------------------------------------------------------------------------------------------|-----------------------------------------------------|------------------------------------------------------|--------------|------------------|----------------|-------------|-------------|--------------|------------|----------|--------------|----------|
|       |     |     |     |                                            |                                                                                                        |                                                     | conflicts                                            |              |                  |                |             |             |              |            |          |              |          |
| KCNH2 | 209 | V   | M   | NM_000238.4(KCNH2):c.1645G>A (p.Val549Met) | Arrhythmia                                                                                             | Uncertain significance(Last reviewed: Nov 24, 2019) | criteria provided, single submitter                  | VCV000919780 | 7                | 150951748      | 919780      | 910760      | rs1257206721 | Neutral    | 0.43     | 0.389        | 0.182    |
| KCNH2 | 210 | L   | P   | NM_000238.4(KCNH2):c.629T>C (p.Leu210Pro)  | Long QT syndrome                                                                                       | Uncertain significance(Last reviewed: Oct 15, 2019) | criteria provided, single submitter                  | VCV000938315 | 7                | 150958346      | 938315      | 933781      | rs1243787663 | Neutral    | 0.58     | 0.246        | 0.174    |
| KCNH2 | 211 | F   | S   | NM_000238.4(KCNH2):c.1652T>C (p.Phe551Ser) | not provided Long QT syndrome                                                                          | Uncertain significance(Last reviewed: Oct 20, 2020) | criteria provided, multiple submitters, no conflicts | VCV000392546 | 7                | 150951741      | 392546      | 369335      | rs1057524535 | Neutral    | 0.591    | 0.254        | 0.155    |
| KCNH2 | 212 | L   | S   | NM_000238.4(KCNH2):c.1655T>C (p.Leu552Ser) | Long QT syndrome 2 Long QT syndrome  Cardiovascular phenotype Congenital long QT syndrome not provided | Pathogenic(Last reviewed: Apr 15, 2021)             | criteria provided, multiple submitters, no conflicts | VCV000067225 | 7                | 150951738      | 67225       | 78121       | rs199472918  | Neutral    | 0.537    | 0.282        | 0.182    |
| KCNH2 | 213 | D   | G   | NM_000238.4(KCNH2):c.638A>G (p.Asp213Gly)  | Long QT syndrome                                                                                       | Uncertain significance(Last reviewed: Oct 28, 2019) | criteria provided, single submitter                  | VCV000971664 | 7                | 150958337      | 971664      | 955097      | rs531677961  | Neutral    | 0.407    | 0.305        | 0.288    |
| KCNH2 | 214 | M   | T   | NM_000238.4(KCNH2):c.1661T>C (p.Met554Thr) | Long QT syndrome                                                                                       | Uncertain significance(Last reviewed: Apr 30, 2019) | criteria provided, single submitter                  | VCV000642793 | 7                | 150951732      | 642793      | 635905      | rs1584854609 | Neutral    | 0.386    | 0.387        | 0.227    |
| KCNH2 | 215 | C   | Y   | NM_000238.4(KCNH2):c.1664G>A (p.Cys555Tyr) | not provided                                                                                           | Likely pathogenic(Last reviewed: May 18, 2016)      | criteria provided, single submitter                  | VCV000372574 | 7                | 150951729      | 372574      | 359636      | rs1057517866 | Neutral    | 0.564    | 0.249        | 0.186    |
| KCNH2 | 215 | V   | G   | NM_000238.4(KCNH2):c.644T>G (p.Val215Gly)  | not provided                                                                                           | not provided                                        | no assertion provided                                | VCV000067515 | 7                | 150958331      | 67515       | 78411       | rs199473500  | Neutral    | 0.596    | 0.261        | 0.143    |
| KCNH2 | 216 | T   | I   | NM_000238.4(KCNH2):c.647C>T (p.Thr216Ile)  | Long QT syndrome                                                                                       | Uncertain significance(Last reviewed: Nov 9, 2018)  | criteria provided, single submitter                  | VCV000582107 | 7                | 150958328      | 582107      | 566595      | rs1563170569 | Neutral    | 0.331    | 0.462        | 0.207    |
| KCNH2 | 218 | A   | E   | NM_000238.4(KCNH2):c.1673C>A (p.Ala558Glu) | Congenital long QT syndrome not provided                                                               | Likely pathogenic(Last reviewed: Jan 22, 2021)      | criteria provided, single submitter                  | VCV000067226 | 7                | 150951720      | 67226       | 78122       | rs199472919  | Neutral    | 0.542    | 0.274        | 0.184    |
| KCNH2 | 218 | M   | V   | NM_000238.4(KCNH2):c.652A>G (p.Met218Val)  | not provided Congenital long QT syndrome Long QT syndrome                                              | Uncertain significance(Last reviewed: Apr 13, 2018) | criteria provided, single submitter                  | VCV000067516 | 7                | 150958323      | 67516       | 78412       | rs199472869  | Neutral    | 0.457    | 0.38         | 0.163    |
| KCNH2 | 219 | D   | N   | NM_000238.4(KCNH2):c.655G>A (p.Asp219Asn)  | Long QT syndrome                                                                                       | Uncertain significance(Last reviewed: Aug 23, 2018) | criteria provided, single submitter                  | VCV000663570 | 7                | 150958320      | 663570      | 635924      | rs1584865954 | Neutral    | 0.407    | 0.275        | 0.318    |
| KCNH2 | 219 | D   | V   | NM_000238.4(KCNH2):c.656A>T (p.Asp219Val)  | Long QT syndrome 2 Long QT syndrome                                                                    | Uncertain significance(Last reviewed: Jul 5, 2019)  | criteria provided, single submitter                  | VCV000157662 | 7                | 150958319      | 157662      | 167508      | rs587777907  | Neutral    | 0.352    | 0.366        | 0.282    |
| KCNH2 | 219 | L   | F   | NM_000238.4(KCNH2):c.1675C>T (p.Leu559Phe) | not provided                                                                                           | Pathogenic(Last reviewed: Feb 5, 2014)              | criteria provided, single submitter                  | VCV000200363 | 7                | 150951718      | 200363      | 197268      | rs794728374  | Neutral    | 0.45     | 0.373        | 0.177    |
| KCNH2 | 219 | L   | H   | NM_000238.4(KCNH2):c.1676T>A (p.Leu559His) | Congenital long QT syndrome                                                                            | not provided                                        | no assertion provided                                | VCV000067227 | 7                | 150951717      | 67227       | 78123       | rs199472920  | Neutral    | 0.489    | 0.313        | 0.198    |
| KCNH2 | 220 | I   | V   | NM_000238.4(KCNH2):c.1678A>G (p.Ile560Val) | Long QT syndrome                                                                                       | Uncertain significance(Last reviewed: Mar 17,       | criteria provided, single submitter                  | VCV001055024 | 7                | 150951715      | 1055024     | 1044809     | NA           | Neutral    | 0.482    | 0.339        | 0.179    |

| gene  | pos | aa1 | aa2 | Name                                       | Condition(s)                                                                                               | Clinical significance (Last reviewed)                                    | Review status                                        | Accession     | GRCh38Chromosome | GRCh38Location | VariationID | AlleleID(s) | dbSNP ID     | prediction | prob.LOF | prob.Neutral | prob.GOF |
|-------|-----|-----|-----|--------------------------------------------|------------------------------------------------------------------------------------------------------------|--------------------------------------------------------------------------|------------------------------------------------------|---------------|------------------|----------------|-------------|-------------|--------------|------------|----------|--------------|----------|
| KCNH2 | 221 | A   | P   | NM_000238.4(KCNH2):c.1681G>C (p.Ala561Pro) | Cardiovascular phenotype Congenital long QT syndrome                                                       | Pathogenic(Last reviewed: Feb 5, 2018)                                   | criteria provided, single submitter                  | VCV000067230  | 7                | 150951712      | 67230       | 78126       | rs199472921  | Neutral    | 0.497    | 0.303        | 0.199    |
| KCNH2 | 221 | A   | T   | NM_000238.4(KCNH2):c.1681G>A (p.Ala561Thr) | Long QT syndrome Cardiovascular phenotype Inborn genetic diseases Congenital long QT syndrome not provided | Pathogenic(Last reviewed: Jun 15, 2020)                                  | criteria provided, multiple submitters, no conflicts | VCV000067229  | 7                | 150951712      | 67229       | 78125       | rs199472921  | Neutral    | 0.381    | 0.414        | 0.205    |
| KCNH2 | 221 | H   | Q   | NM_000238.4(KCNH2):c.663C>G (p.His221Gln)  | Long QT syndrome                                                                                           | Uncertain significance(Last reviewed: Oct 29, 2018)                      | criteria provided, single submitter                  | VCV0000647893 | 7                | 150958312      | 647893      | 635923      | rs752896394  | Neutral    | 0.406    | 0.359        | 0.235    |
| KCNH2 | 222 | H   | P   | NM_000238.4(KCNH2):c.1685A>C (p.His562Pro) | Congenital long QT syndrome                                                                                | not provided                                                             | no assertion provided                                | VCV000067231  | 7                | 150951708      | 67231       | 78127       | rs199472922  | Neutral    | 0.475    | 0.322        | 0.203    |
| KCNH2 | 222 | H   | Q   | NM_000238.4(KCNH2):c.1686C>G (p.His562Gln) | not provided                                                                                               | Likely pathogenic(Last reviewed: Oct 21, 2016)                           | criteria provided, single submitter                  | VCV000379052  | 7                | 150951707      | 379052      | 369333      | rs1057520477 | Neutral    | 0.434    | 0.339        | 0.227    |
| KCNH2 | 222 | H   | R   | NM_000238.4(KCNH2):c.1685A>G (p.His562Arg) | Long QT syndrome Congenital long QT syndrome                                                               | Pathogenic(Last reviewed: Oct 1, 2019)                                   | criteria provided, single submitter                  | VCV000067232  | 7                | 150951708      | 67232       | 78128       | rs199472922  | Neutral    | 0.476    | 0.281        | 0.243    |
| KCNH2 | 222 | H   | Y   | NM_000238.4(KCNH2):c.1684C>T (p.His562Tyr) | not provided Long QT syndrome                                                                              | Conflicting interpretations of pathogenicity(Last reviewed: Aug 1, 2019) | criteria provided, conflicting interpretations       | VCV000200733  | 7                | 150951709      | 200733      | 197265      | rs794728481  | Neutral    | 0.386    | 0.406        | 0.208    |
| KCNH2 | 222 | V   | M   | NM_000238.4(KCNH2):c.664G>A (p.Val222Met)  | Long QT syndrome                                                                                           | Uncertain significance(Last reviewed: Apr 9, 2019)                       | criteria provided, single submitter                  | VCV000835460  | 7                | 150958311      | 835460      | 833356      | rs1263535997 | Neutral    | 0.453    | 0.387        | 0.159    |
| KCNH2 | 223 | W   | C   | NM_000238.4(KCNH2):c.1689G>T (p.Trp563Cys) | Congenital long QT syndrome                                                                                | not provided                                                             | no assertion provided                                | VCV000067234  | 7                | 150951704      | 67234       | 78130       | rs199473517  | Neutral    | 0.567    | 0.263        | 0.169    |
| KCNH2 | 223 | W   | C   | NM_000238.4(KCNH2):c.1689G>T (p.Trp563Cys) | Congenital long QT syndrome                                                                                | not provided                                                             | no assertion provided                                | VCV000067234  | 7                | 150951704      | 67234       | 78130       | rs199473517  | Neutral    | 0.567    | 0.263        | 0.169    |
| KCNH2 | 223 | W   | C   | NM_000238.4(KCNH2):c.1689G>C (p.Trp563Cys) | not provided                                                                                               | Likely pathogenic(Last reviewed: Jul 31, 2018)                           | criteria provided, single submitter                  | VCV000200368  | 7                | 150951704      | 200368      | 197264      | rs199473517  | Neutral    | 0.567    | 0.263        | 0.169    |
| KCNH2 | 223 | W   | C   | NM_000238.4(KCNH2):c.1689G>C (p.Trp563Cys) | not provided                                                                                               | Likely pathogenic(Last reviewed: Jul 31, 2018)                           | criteria provided, single submitter                  | VCV000200368  | 7                | 150951704      | 200368      | 197264      | rs199473517  | Neutral    | 0.567    | 0.263        | 0.169    |
| KCNH2 | 223 | W   | G   | NM_000238.4(KCNH2):c.1687T>G (p.Trp563Gly) | Congenital long QT syndrome                                                                                | not provided                                                             | no assertion provided                                | VCV000067233  | 7                | 150951706      | 67233       | 78129       | rs199472923  | Neutral    | 0.601    | 0.231        | 0.167    |
| KCNH2 | 224 | G   | R   | NM_000238.4(KCNH2):c.670G>A (p.Gly224Arg)  | not provided                                                                                               | Uncertain significance(Last reviewed: Jul 3, 2019)                       | criteria provided, multiple submitters, no conflicts | VCV000200297  | 7                | 150958305      | 200297      | 197320      | rs794728358  | GOF        | 0.466    | 0.186        | 0.348    |
| KCNH2 | 224 | L   | P   | NM_000238.4(KCNH2):c.1691T>C (p.Leu564Pro) | Congenital long QT syndrome                                                                                | not provided                                                             | no assertion provided                                | VCV000067235  | 7                | 150951702      | 67235       | 78131       | rs199472924  | Neutral    | 0.575    | 0.224        | 0.201    |
| KCNH2 | 225 | A   | P   | NM_000238.4(KCNH2):c.1693G>C (p.Ala565Pro) | not provided                                                                                               | Likely pathogenic(Last reviewed: Feb 2, 2015)                            | criteria provided, single submitter                  | VCV000200372  | 7                | 150951700      | 200372      | 197262      | rs199473518  | Neutral    | 0.526    | 0.276        | 0.199    |
| KCNH2 | 225 | A   | S   | NM_000238.4(KCNH2):c.1693G>T (p.Ala565Ser) | Cardiovascular phenotype                                                                                   | Uncertain significance(Last reviewed: Feb 20,                            | criteria provided, single submitter                  | VCV000519393  | 7                | 150951700      | 519393      | 509866      | rs199473518  | Neutral    | 0.445    | 0.339        | 0.216    |

| gene  | pos | aa1 | aa2 | Name                                       | Condition(s)                                              | Clinical significance (Last reviewed)                                     | Review status                                  | Accession    | GRCh38Chromosome | GRCh38Location | VariationID | AlleleID(s) | dbSNP ID     | prediction | prob.LOF | prob.Neutral | prob.GOF |
|-------|-----|-----|-----|--------------------------------------------|-----------------------------------------------------------|---------------------------------------------------------------------------|------------------------------------------------|--------------|------------------|----------------|-------------|-------------|--------------|------------|----------|--------------|----------|
|       |     |     |     |                                            |                                                           | 2017)                                                                     |                                                |              |                  |                |             |             |              |            |          |              |          |
| KCNH2 | 225 | A   | T   | NM_000238.4(KCNH2):c.1693G>A (p.Ala565Thr) | Congenital long QT syndrome                               | not provided                                                              | no assertion provided                          | VCV000067236 | 7                | 150951700      | 67236       | 78132       | rs199473518  | Neutral    | 0.417    | 0.371        | 0.212    |
| KCNH2 | 225 | A   | V   | NM_000238.4(KCNH2):c.1694C>T (p.Ala565Val) | not provided                                              | Likely pathogenic(Last reviewed: Oct 1, 2019)                             | criteria provided, single submitter            | VCV000200735 | 7                | 150951699      | 200735      | 197261      | rs794728482  | Neutral    | 0.406    | 0.393        | 0.201    |
| KCNH2 | 226 | C   | F   | NM_000238.4(KCNH2):c.1697G>T (p.Cys566Phe) | Congenital long QT syndrome                               | not provided                                                              | no assertion provided                          | VCV000067239 | 7                | 150951696      | 67239       | 78135       | rs199472925  | Neutral    | 0.536    | 0.262        | 0.202    |
| KCNH2 | 226 | C   | G   | NM_000238.4(KCNH2):c.1696T>G (p.Cys566Gly) | Congenital long QT syndrome                               | not provided                                                              | no assertion provided                          | VCV000067237 | 7                | 150951697      | 67237       | 78133       | rs199473038  | Neutral    | 0.597    | 0.217        | 0.186    |
| KCNH2 | 226 | C   | S   | NM_000238.4(KCNH2):c.1697G>C (p.Cys566Ser) | Congenital long QT syndrome                               | not provided                                                              | no assertion provided                          | VCV000067238 | 7                | 150951696      | 67238       | 78134       | rs199472925  | Neutral    | 0.533    | 0.237        | 0.23     |
| KCNH2 | 227 | I   | T   | NM_000238.4(KCNH2):c.1700T>C (p.Ile567Thr) | Long QT syndrome Congenital long QT syndrome              | Uncertain significance(Last reviewed: Aug 31, 2018)                       | criteria provided, single submitter            | VCV000067241 | 7                | 150951693      | 67241       | 78137       | rs199473519  | Neutral    | 0.458    | 0.301        | 0.242    |
| KCNH2 | 228 | A   | P   | NM_000238.4(KCNH2):c.682G>C (p.Ala228Pro)  | Long QT syndrome                                          | Uncertain significance(Last reviewed: Oct 30, 2020)                       | criteria provided, single submitter            | VCV000526974 | 7                | 150958293      | 526974      | 523146      | rs989191027  | Neutral    | 0.634    | 0.191        | 0.175    |
| KCNH2 | 228 | A   | V   | NM_000238.4(KCNH2):c.683C>T (p.Ala228Val)  | Long QT syndrome                                          | Uncertain significance(Last reviewed: Aug 10, 2018)                       | criteria provided, single submitter            | VCV000659941 | 7                | 150958292      | 659941      | 635922      | rs1184559298 | Neutral    | 0.535    | 0.288        | 0.177    |
| KCNH2 | 228 | W   | C   | NM_000238.4(KCNH2):c.1704G>C (p.Trp568Cys) | Long QT syndrome Congenital long QT syndrome              | Likely pathogenic(Last reviewed: Aug 8, 2018)                             | criteria provided, single submitter            | VCV000067243 | 7                | 150951689      | 67243       | 78139       | rs199472926  | Neutral    | 0.652    | 0.205        | 0.143    |
| KCNH2 | 228 | W   | C   | NM_000238.4(KCNH2):c.1704G>C (p.Trp568Cys) | Long QT syndrome Congenital long QT syndrome              | Likely pathogenic(Last reviewed: Aug 8, 2018)                             | criteria provided, single submitter            | VCV000067243 | 7                | 150951689      | 67243       | 78139       | rs199472926  | Neutral    | 0.652    | 0.205        | 0.143    |
| KCNH2 | 228 | W   | C   | NM_000238.4(KCNH2):c.1704G>T (p.Trp568Cys) | Congenital long QT syndrome                               | not provided                                                              | no assertion provided                          | VCV000067244 | 7                | 150951689      | 67244       | 78140       | rs199472926  | Neutral    | 0.652    | 0.205        | 0.143    |
| KCNH2 | 228 | W   | C   | NM_000238.4(KCNH2):c.1704G>T (p.Trp568Cys) | Congenital long QT syndrome                               | not provided                                                              | no assertion provided                          | VCV000067244 | 7                | 150951689      | 67244       | 78140       | rs199472926  | Neutral    | 0.652    | 0.205        | 0.143    |
| KCNH2 | 228 | W   | R   | NM_000238.4(KCNH2):c.1702T>C (p.Trp568Arg) | Congenital long QT syndrome                               | not provided                                                              | no assertion provided                          | VCV000067242 | 7                | 150951691      | 67242       | 78138       | rs199472927  | LOF        | 0.681    | 0.141        | 0.178    |
| KCNH2 | 228 | W   | S   | NM_000238.4(KCNH2):c.1703G>C (p.Trp568Ser) | Long QT syndrome                                          | Uncertain significance(Last reviewed: Aug 31, 2016)                       | criteria provided, single submitter            | VCV000520444 | 7                | 150951690      | 520444      | 511087      | rs1554425880 | Neutral    | 0.668    | 0.179        | 0.153    |
| KCNH2 | 229 | Y   | H   | NM_000238.4(KCNH2):c.1705T>C (p.Tyr569His) | Congenital long QT syndrome                               | not provided                                                              | no assertion provided                          | VCV000067245 | 7                | 150951688      | 67245       | 78141       | rs199473520  | Neutral    | 0.556    | 0.27         | 0.174    |
| KCNH2 | 230 | A   | S   | NM_000238.4(KCNH2):c.1708G>T (p.Ala570Ser) | not provided                                              | Likely pathogenic                                                         | no assertion criteria provided                 | VCV001284270 | 7                | 150951685      | 1284270     | 1274125     | NA           | Neutral    | 0.546    | 0.285        | 0.169    |
| KCNH2 | 230 | A   | T   | NM_000238.4(KCNH2):c.1708G>A (p.Ala570Thr) | Long QT syndrome                                          | Uncertain significance(Last reviewed: Sep 17, 2020)                       | criteria provided, single submitter            | VCV001043586 | 7                | 150951685      | 1043586     | 1027888     | rs1727086844 | Neutral    | 0.52     | 0.314        | 0.166    |
| KCNH2 | 231 | I   | L   | NM_000238.4(KCNH2):c.1711A>C (p.Ile571Leu) | Congenital long QT syndrome                               | not provided                                                              | no assertion provided                          | VCV000067246 | 7                | 150951682      | 67246       | 78142       | rs199472928  | Neutral    | 0.61     | 0.26         | 0.129    |
| KCNH2 | 231 | I   | V   | NM_000238.4(KCNH2):c.1711A>G (p.Ile571Val) | not provided Long QT syndrome Congenital long QT syndrome | Conflicting interpretations of pathogenicity(Last reviewed: Aug 11, 2017) | criteria provided, conflicting interpretations | VCV000067247 | 7                | 150951682      | 67247       | 78143       | rs199472928  | Neutral    | 0.615    | 0.253        | 0.132    |



| gene  | pos | aa1 | aa2 | Name                                       | Condition(s)                                                                                          | Clinical significance (Last reviewed)               | Review status                                        | Accession    | GRCh38Chromosome | GRCh38Location | VariationID | AlleleID(s) | dbSNP ID     | prediction | prob.LOF | prob.Neutral | prob.GOF |
|-------|-----|-----|-----|--------------------------------------------|-------------------------------------------------------------------------------------------------------|-----------------------------------------------------|------------------------------------------------------|--------------|------------------|----------------|-------------|-------------|--------------|------------|----------|--------------|----------|
| KCNH2 | 231 | R   | Q   | NM_000238.4(KCNH2):c.692G>A (p.Arg231Gln)  | Long QT syndrome                                                                                      | Uncertain significance(Last reviewed: Aug 11, 2020) | criteria provided, single submitter                  | VCV000952892 | 7                | 150958283      | 952892      | 924758      | rs1383803455 | Neutral    | 0.57     | 0.254        | 0.176    |
| KCNH2 | 232 | G   | A   | NM_000238.4(KCNH2):c.1715G>C (p.Gly572Ala) | not provided                                                                                          | Likely pathogenic(Last reviewed: Dec 19, 2016)      | criteria provided, single submitter                  | VCV000391858 | 7                | 150951678      | 391858      | 369040      | rs199473423  | Neutral    | 0.416    | 0.34         | 0.244    |
| KCNH2 | 232 | G   | C   | NM_000238.4(KCNH2):c.1714G>T (p.Gly572Cys) | Congenital long QT syndrome                                                                           | not provided                                        | no assertion provided                                | VCV000067249 | 7                | 150951679      | 67249       | 78145       | rs9333649    | Neutral    | 0.459    | 0.336        | 0.205    |
| KCNH2 | 232 | G   | D   | NM_000238.4(KCNH2):c.1715G>A (p.Gly572Asp) | Congenital long QT syndrome                                                                           | not provided                                        | no assertion provided                                | VCV000067250 | 7                | 150951678      | 67250       | 78146       | rs199473423  | Neutral    | 0.496    | 0.265        | 0.239    |
| KCNH2 | 232 | G   | S   | NM_000238.4(KCNH2):c.1714G>A (p.Gly572Ser) | not provided Long QT syndrome 2 Long QT syndrome Cardiovascular phenotype Congenital long QT syndrome | Pathogenic(Last reviewed: Nov 8, 2019)              | criteria provided, multiple submitters, no conflicts | VCV000067248 | 7                | 150951679      | 67248       | 78144       | rs9333649    | Neutral    | 0.429    | 0.301        | 0.27     |
| KCNH2 | 232 | G   | V   | NM_000238.4(KCNH2):c.1715G>T (p.Gly572Val) | not provided Congenital long QT syndrome                                                              | Pathogenic(Last reviewed: May 4, 2016)              | criteria provided, single submitter                  | VCV000067251 | 7                | 150951678      | 67251       | 78147       | rs199473423  | Neutral    | 0.421    | 0.34         | 0.239    |
| KCNH2 | 232 | R   | C   | NM_000238.4(KCNH2):c.694C>T (p.Arg232Cys)  | Long QT syndrome                                                                                      | Uncertain significance(Last reviewed: Oct 27, 2020) | criteria provided, single submitter                  | VCV000855032 | 7                | 150958281      | 855032      | 833354      | rs956828658  | Neutral    | 0.468    | 0.353        | 0.179    |
| KCNH2 | 232 | R   | L   | NM_000238.4(KCNH2):c.695G>T (p.Arg232Leu)  | Cardiovascular phenotype                                                                              | Uncertain significance(Last reviewed: Nov 18, 2015) | criteria provided, single submitter                  | VCV000264446 | 7                | 150958280      | 264446      | 258464      | rs886039160  | Neutral    | 0.412    | 0.398        | 0.19     |
| KCNH2 | 233 | A   | S   | NM_000238.4(KCNH2):c.697G>T (p.Ala233Ser)  | Long QT syndrome not provided                                                                         | Likely benign(Last reviewed: May 13, 2020)          | criteria provided, multiple submitters, no conflicts | VCV000527096 | 7                | 150958278      | 527096      | 522697      | rs772037564  | Neutral    | 0.422    | 0.28         | 0.298    |
| KCNH2 | 233 | A   | T   | NM_000238.4(KCNH2):c.697G>A (p.Ala233Thr)  | Long QT syndrome                                                                                      | Uncertain significance(Last reviewed: May 28, 2019) | criteria provided, single submitter                  | VCV000848897 | 7                | 150958278      | 848897      | 833353      | rs772037564  | Neutral    | 0.403    | 0.298        | 0.299    |
| KCNH2 | 234 | M   | V   | NM_000238.4(KCNH2):c.1720A>G (p.Met574Val) | Congenital long QT syndrome                                                                           | not provided                                        | no assertion provided                                | VCV000067252 | 7                | 150951673      | 67252       | 78148       | rs199473667  | Neutral    | 0.505    | 0.31         | 0.184    |
| KCNH2 | 235 | E   | G   | NM_000238.4(KCNH2):c.1724A>G (p.Glu575Gly) | Congenital long QT syndrome                                                                           | not provided                                        | no assertion provided                                | VCV000067253 | 7                | 150951669      | 67253       | 78149       | rs199473424  | Neutral    | 0.483    | 0.305        | 0.212    |
| KCNH2 | 235 | V   | A   | NM_000238.4(KCNH2):c.704T>C (p.Val235Ala)  | not provided                                                                                          | Uncertain significance                              | no assertion criteria provided                       | VCV001049705 | 7                | 150958271      | 1049705     | 1037760     | NA           | Neutral    | 0.487    | 0.334        | 0.179    |
| KCNH2 | 236 | G   | D   | NM_000238.4(KCNH2):c.707G>A (p.Gly236Asp)  | Long QT syndrome                                                                                      | Uncertain significance(Last reviewed: Feb 6, 2020)  | criteria provided, single submitter                  | VCV000952259 | 7                | 150958268      | 952259      | 924757      | rs199472870  | GOF        | 0.476    | 0.214        | 0.31     |
| KCNH2 | 236 | G   | V   | NM_000238.4(KCNH2):c.707G>T (p.Gly236Val)  | not provided Long QT syndrome                                                                         | Uncertain significance(Last reviewed: Aug 4, 2021)  | criteria provided, multiple submitters, no conflicts | VCV000067518 | 7                | 150958268      | 67518       | 78414       | rs199472870  | Neutral    | 0.412    | 0.284        | 0.304    |
| KCNH2 | 237 | P   | H   | NM_000238.4(KCNH2):c.710C>A (p.Pro237His)  | Long QT syndrome                                                                                      | Uncertain significance(Last reviewed: Nov 8, 2018)  | criteria provided, single submitter                  | VCV000526973 | 7                | 150958265      | 526973      | 522781      | rs1554427821 | Neutral    | 0.359    | 0.306        | 0.336    |
| KCNH2 | 238 | G   | S   | NM_000238.4(KCNH2):c.712G>A (p.Gly238Ser)  | Congenital long QT syndrome                                                                           | not provided                                        | no assertion provided                                | VCV000067519 | 7                | 150958263      | 67519       | 78415       | rs199473501  | GOF        | 0.381    | 0.231        | 0.388    |
| KCNH2 | 238 | H   | P   | NM_000238.4(KCNH2):c.1733A>C (p.His578Pro) | not provided                                                                                          | Uncertain significance(Last reviewed: Nov 8, 2018)  | criteria provided, single submitter                  | VCV000200378 | 7                | 150951660      | 200378      | 197258      | rs794728376  | Neutral    | 0.412    | 0.272        | 0.315    |

| gene  | pos | aa1 | aa2 | Name                                               | Condition(s)                                                                                                                                            | Clinical significance (Last reviewed)                                     | Review status                                        | Accession    | GRCh38Chromosome | GRCh38Location        | VariationID | AlleleID(s) | dbSNP ID     | prediction | prob.LOF | prob.Neutral | prob.GOF |
|-------|-----|-----|-----|----------------------------------------------------|---------------------------------------------------------------------------------------------------------------------------------------------------------|---------------------------------------------------------------------------|------------------------------------------------------|--------------|------------------|-----------------------|-------------|-------------|--------------|------------|----------|--------------|----------|
|       |     |     |     |                                                    |                                                                                                                                                         | reviewed: May 10, 2014)                                                   | submitter                                            |              |                  |                       |             |             |              |            |          |              |          |
| KCNH2 | 239 | M   | T   | NM_000238.4(KCNH2):c.1736T>C (p.Met579Thr)         | Long QT syndrome Congenital long QT syndrome                                                                                                            | Uncertain significance(Last reviewed: May 31, 2020)                       | criteria provided, single submitter                  | VCV000067255 | 7                | 150951657             | 67255       | 78151       | rs199473425  | Neutral    | 0.392    | 0.317        | 0.291    |
| KCNH2 | 240 | D   | H   | NM_000238.4(KCNH2):c.1738G>C (p.Asp580His)         | not provided                                                                                                                                            | Likely pathogenic                                                         | no assertion criteria provided                       | VCV000191223 | 7                | 150951655             | 191223      | 189026      | rs786205588  | GOF        | 0.388    | 0.275        | 0.337    |
| KCNH2 | 240 | P   | L   | NM_000238.4(KCNH2):c.719C>T (p.Pro240Leu)          | Long QT syndrome not provided                                                                                                                           | Uncertain significance(Last reviewed: Jul 24, 2020)                       | criteria provided, multiple submitters, no conflicts | VCV000200299 | 7                | 150958256             | 200299      | 197318      | rs794728359  | Neutral    | 0.413    | 0.333        | 0.254    |
| KCNH2 | 241 | P   | L   | NM_000238.4(KCNH2):c.722C>T (p.Pro241Leu)          | Congenital long QT syndrome                                                                                                                             | not provided                                                              | no assertion provided                                | VCV000067520 | 7                | 150958253             | 67520       | 78416       | rs199472871  | Neutral    | 0.365    | 0.351        | 0.283    |
| KCNH2 | 242 | R   | C   | NM_000238.4(KCNH2):c.724C>T (p.Arg242Cys)          | Long QT syndrome                                                                                                                                        | Uncertain significance(Last reviewed: Jul 12, 2019)                       | criteria provided, single submitter                  | VCV000652662 | 7                | 150958251             | 652662      | 635921      | rs199472872  | Neutral    | 0.412    | 0.356        | 0.232    |
| KCNH2 | 242 | R   | G   | NM_000238.4(KCNH2):c.724C>G (p.Arg242Gly)          | Congenital long QT syndrome                                                                                                                             | not provided                                                              | no assertion provided                                | VCV000067521 | 7                | 150958251             | 67521       | 78417       | rs199472872  | Neutral    | 0.437    | 0.309        | 0.253    |
| KCNH2 | 242 | R   | L   | NM_000238.4(KCNH2):c.1745G>T (p.Arg582Leu)         | Congenital long QT syndrome Long QT syndrome                                                                                                            | Likely pathogenic(Last reviewed: Mar 25, 2020)                            | criteria provided, single submitter                  | VCV000067258 | 7                | 150951648             | 67258       | 78154       | rs199473426  | Neutral    | 0.372    | 0.372        | 0.257    |
| KCNH2 | 242 | R   | Q   | NM_000238.4(KCNH2):c.725_726delinsAA (p.Arg242Gln) | Long QT syndrome                                                                                                                                        | Uncertain significance(Last reviewed: May 30, 2017)                       | criteria provided, single submitter                  | VCV000456938 | 7                | 150958249 - 150958250 | 456938      | 457576      | rs1554427803 | GOF        | 0.401    | 0.281        | 0.319    |
| KCNH2 | 243 | I   | M   | NM_000238.4(KCNH2):c.1749C>G (p.Ile583Met)         | Long QT syndrome                                                                                                                                        | Uncertain significance(Last reviewed: Mar 25, 2020)                       | criteria provided, single submitter                  | VCV001023474 | 7                | 150951644             | 1023474     | 1007349     | rs765893780  | Neutral    | 0.456    | 0.369        | 0.175    |
| KCNH2 | 243 | I   | V   | NM_000238.4(KCNH2):c.1747A>G (p.Ile583Val)         | Congenital long QT syndrome                                                                                                                             | not provided                                                              | no assertion provided                                | VCV000067259 | 7                | 150951646             | 67259       | 78155       | rs199473427  | Neutral    | 0.485    | 0.331        | 0.184    |
| KCNH2 | 243 | S   | R   | NM_000238.4(KCNH2):c.729C>G (p.Ser243Arg)          | Long QT syndrome                                                                                                                                        | Uncertain significance(Last reviewed: Oct 19, 2018)                       | criteria provided, single submitter                  | VCV000648410 | 7                | 150958246             | 648410      | 635920      | rs863224337  | Neutral    | 0.411    | 0.281        | 0.308    |
| KCNH2 | 244 | A   | E   | NM_000238.4(KCNH2):c.731C>A (p.Ala244Glu)          | Long QT syndrome                                                                                                                                        | Uncertain significance(Last reviewed: Nov 6, 2019)                        | criteria provided, single submitter                  | VCV000969507 | 7                | 150958244             | 969507      | 955096      | rs748762712  | Neutral    | 0.509    | 0.271        | 0.22     |
| KCNH2 | 244 | A   | V   | NM_000238.4(KCNH2):c.731C>T (p.Ala244Val)          | Long QT syndrome                                                                                                                                        | Uncertain significance(Last reviewed: Aug 31, 2018)                       | criteria provided, single submitter                  | VCV000405349 | 7                | 150958244             | 405349      | 395868      | rs748762712  | Neutral    | 0.413    | 0.365        | 0.222    |
| KCNH2 | 244 | G   | C   | NM_000238.4(KCNH2):c.1750G>T (p.Gly584Cys)         | Congenital long QT syndrome Long QT syndrome not provided                                                                                               | Conflicting interpretations of pathogenicity(Last reviewed: Oct 17, 2018) | criteria provided, conflicting interpretations       | VCV000067263 | 7                | 150951643             | 67263       | 78159       | rs199473428  | Neutral    | 0.453    | 0.33         | 0.216    |
| KCNH2 | 244 | G   | R   | NM_000238.4(KCNH2):c.1750G>C (p.Gly584Arg)         | Congenital long QT syndrome                                                                                                                             | not provided                                                              | no assertion provided                                | VCV000067262 | 7                | 150951643             | 67262       | 78158       | rs199473428  | Neutral    | 0.501    | 0.218        | 0.281    |
| KCNH2 | 244 | G   | S   | NM_000238.4(KCNH2):c.1750G>A (p.Gly584Ser)         | Cardiovascular phenotype Congenital long QT syndrome Long QT syndrome 2 Short QT syndrome 1 not provided Long QT syndrome Arrhythmic Long QT syndrome 2 | Pathogenic/Likely pathogenic(Last reviewed: Oct 11, 2021)                 | criteria provided, multiple submitters, no conflicts | VCV000067261 | 7                | 150951643             | 67261       | 78157       | rs199473428  | Neutral    | 0.44     | 0.288        | 0.272    |

| gene  | pos | aa1 | aa2 | Name                                       | Condition(s)                                 | Clinical significance (Last reviewed)               | Review status                       | Accession    | GRCh38Chromosome | GRCh38Location | VariationID | AlleleID(s) | dbSNP ID     | prediction | prob.LOF | prob.Neutral | prob.GOF |
|-------|-----|-----|-----|--------------------------------------------|----------------------------------------------|-----------------------------------------------------|-------------------------------------|--------------|------------------|----------------|-------------|-------------|--------------|------------|----------|--------------|----------|
| KCNH2 | 244 | G   | V   | NM_000238.4(KCNH2):c.1751G>T (p.Gly584Val) | Congenital long QT syndrome                  | not provided                                        | no assertion provided               | VCV000067264 | 7                | 150951642      | 67264       | 78160       | rs199473429  | Neutral    | 0.424    | 0.326        | 0.25     |
| KCNH2 | 245 | W   | C   | NM_000238.4(KCNH2):c.1755G>T (p.Trp585Cys) | Congenital long QT syndrome                  | not provided                                        | no assertion provided               | VCV000067265 | 7                | 150951638      | 67265       | 78161       | rs199473430  | Neutral    | 0.532    | 0.295        | 0.173    |
| KCNH2 | 245 | W   | L   | NM_000238.4(KCNH2):c.1754G>T (p.Trp585Leu) | not provided                                 | Likely pathogenic(Last reviewed: Feb 27, 2012)      | criteria provided, single submitter | VCV000200739 | 7                | 150951639      | 200739      | 197256      | rs794728484  | Neutral    | 0.479    | 0.328        | 0.193    |
| KCNH2 | 246 | G   | C   | NM_000238.4(KCNH2):c.736G>T (p.Gly246Cys)  | not specified                                | Likely benign(Last reviewed: May 11, 2015)          | criteria provided, single submitter | VCV000379687 | 7                | 150958239      | 379687      | 371000      | rs1057520689 | Neutral    | 0.413    | 0.3          | 0.287    |
| KCNH2 | 246 | L   | V   | NM_000238.4(KCNH2):c.1756C>G (p.Leu586Val) | not provided                                 | Uncertain significance(Last reviewed: Mar 9, 2020)  | criteria provided, single submitter | VCV000993664 | 7                | 150951637      | 993664      | 981595      | rs1801169246 | Neutral    | 0.471    | 0.296        | 0.232    |
| KCNH2 | 247 | Q   | R   | NM_000238.4(KCNH2):c.740A>G (p.Gln247Arg)  | Long QT syndrome                             | Uncertain significance(Last reviewed: Jul 25, 2020) | criteria provided, single submitter | VCV001057001 | 7                | 150958235      | 1057001     | 1044812     | NA           | GOF        | 0.408    | 0.233        | 0.359    |
| KCNH2 | 248 | N   | D   | NM_000238.4(KCNH2):c.1762A>G (p.Asn588Asp) | Congenital long QT syndrome                  | not provided                                        | no assertion provided               | VCV000067266 | 7                | 150951631      | 67266       | 78162       | rs199473431  | Neutral    | 0.475    | 0.284        | 0.241    |
| KCNH2 | 250 | G   | V   | NM_000238.4(KCNH2):c.1769G>T (p.Gly590Val) | Congenital long QT syndrome                  | not provided                                        | no assertion provided               | VCV000067267 | 7                | 150951624      | 67267       | 78163       | rs199472929  | Neutral    | 0.395    | 0.299        | 0.306    |
| KCNH2 | 251 | P   | A   | NM_000238.4(KCNH2):c.751C>G (p.Pro251Ala)  | not provided                                 | not provided                                        | no assertion provided               | VCV000067522 | 7                | 150958224      | 67522       | 78418       | rs199472873  | Neutral    | 0.401    | 0.354        | 0.244    |
| KCNH2 | 251 | P   | S   | NM_000238.4(KCNH2):c.751C>T (p.Pro251Ser)  | Long QT syndrome Congenital long QT syndrome | Uncertain significance(Last reviewed: Jan 30, 2018) | criteria provided, single submitter | VCV000067523 | 7                | 150958224      | 67523       | 78419       | rs199472873  | Neutral    | 0.403    | 0.319        | 0.278    |
| KCNH2 | 252 | R   | G   | NM_000238.4(KCNH2):c.754C>G (p.Arg252Gly)  | Congenital long QT syndrome                  | not provided                                        | no assertion provided               | VCV000067524 | 7                | 150958221      | 67524       | 78420       | rs199472874  | Neutral    | 0.452    | 0.304        | 0.244    |
| KCNH2 | 252 | R   | Q   | NM_000238.4(KCNH2):c.755G>A (p.Arg252Gln)  | Long QT syndrome                             | Uncertain significance(Last reviewed: Feb 12, 2020) | criteria provided, single submitter | VCV000180380 | 7                | 150958220      | 180380      | 178577      | rs730880117  | GOF        | 0.415    | 0.278        | 0.308    |
| KCNH2 | 253 | A   | G   | NM_000238.4(KCNH2):c.758C>G (p.Ala253Gly)  | not provided                                 | Uncertain significance(Last reviewed: Oct 27, 2014) | criteria provided, single submitter | VCV000200723 | 7                | 150958217      | 200723      | 197314      | rs794728479  | Neutral    | 0.478    | 0.303        | 0.219    |
| KCNH2 | 253 | I   | K   | NM_000238.4(KCNH2):c.1778T>A (p.Ile593Lys) | Long QT syndrome Congenital long QT syndrome | Pathogenic(Last reviewed: Jul 25, 2017)             | criteria provided, single submitter | VCV000067269 | 7                | 150951615      | 67269       | 78165       | rs28928904   | Neutral    | 0.576    | 0.235        | 0.188    |
| KCNH2 | 253 | I   | T   | NM_000238.4(KCNH2):c.1778T>C (p.Ile593Thr) | Congenital long QT syndrome not provided     | Pathogenic(Last reviewed: Feb 2, 2014)              | criteria provided, single submitter | VCV000067270 | 7                | 150951615      | 67270       | 78166       | rs28928904   | Neutral    | 0.495    | 0.307        | 0.198    |
| KCNH2 | 253 | I   | V   | NM_000238.4(KCNH2):c.1777A>G (p.Ile593Val) | Congenital long QT syndrome                  | not provided                                        | no assertion provided               | VCV000067268 | 7                | 150951616      | 67268       | 78164       | rs199472930  | Neutral    | 0.512    | 0.31         | 0.177    |
| KCNH2 | 254 | G   | D   | NM_000238.4(KCNH2):c.1781G>A (p.Gly594Asp) | Long QT syndrome Congenital long QT syndrome | Likely pathogenic(Last reviewed: Jul 31, 2019)      | criteria provided, single submitter | VCV000067271 | 7                | 150951612      | 67271       | 78167       | rs199472931  | Neutral    | 0.462    | 0.274        | 0.264    |
| KCNH2 | 254 | G   | R   | NM_000238.4(KCNH2):c.1780G>C (p.Gly594Arg) | Long QT syndrome                             | Uncertain significance(Last reviewed: Jan 27, 2020) | criteria provided, single submitter | VCV001026973 | 7                | 150951613      | 1026973     | 1007348     | rs1801167694 | Neutral    | 0.465    | 0.249        | 0.286    |
| KCNH2 | 254 | H   | Q   | NM_000238.4(KCNH2):c.762C>G (p.His254Gln)  | not provided                                 | not provided                                        | no assertion provided               | VCV000067525 | 7                | 150958213      | 67525       | 78421       | rs199473502  | Neutral    | 0.404    | 0.321        | 0.275    |
| KCNH2 | 255 | K   | E   | NM_000238.4(KCNH2):c.1783A>G               | Congenital long QT syndrome                  | not provided                                        | no assertion                        | VCV000067272 | 7                | 150951610      | 67272       | 78168       | rs199472932  | Neutral    | 0.425    | 0.278        | 0.297    |

| gene  | pos | aa1 | aa2 | Name                                       | Condition(s)                                                                              | Clinical significance (Last reviewed)               | Review status                                        | Accession    | GRCh38Chromosome | GRCh38Location | VariationID | AlleleID(s) | dbSNP ID     | prediction | prob.LOF | prob.Neutral | prob.GOF |
|-------|-----|-----|-----|--------------------------------------------|-------------------------------------------------------------------------------------------|-----------------------------------------------------|------------------------------------------------------|--------------|------------------|----------------|-------------|-------------|--------------|------------|----------|--------------|----------|
|       |     |     |     | (p.Lys595Glu)                              |                                                                                           |                                                     | provided                                             |              |                  |                |             |             |              |            |          |              |          |
| KCNH2 | 255 | K   | N   | NM_000238.4(KCNH2):c.1785A>T (p.Lys595Asn) | Congenital long QT syndrome                                                               | not provided                                        | no assertion provided                                | VCV000067273 | 7                | 150951608      | 67273       | 78169       | rs199473521  | GOF        | 0.384    | 0.284        | 0.333    |
| KCNH2 | 256 | P   | A   | NM_000238.4(KCNH2):c.1786C>G (p.Pro596Ala) | Long QT syndrome 2                                                                        | Pathogenic(Last reviewed: Nov 4, 2015)              | criteria provided, single submitter                  | VCV000218093 | 7                | 150951607      | 218093      | 214747      | rs863225288  | Neutral    | 0.38     | 0.406        | 0.215    |
| KCNH2 | 256 | P   | H   | NM_000238.4(KCNH2):c.1787C>A (p.Pro596His) | Congenital long QT syndrome not provided                                                  | Pathogenic(Last reviewed: Jan 31, 2014)             | criteria provided, single submitter                  | VCV000067274 | 7                | 150951606      | 67274       | 78170       | rs199472933  | Neutral    | 0.395    | 0.376        | 0.229    |
| KCNH2 | 256 | P   | L   | NM_000238.4(KCNH2):c.1787C>T (p.Pro596Leu) | Congenital long QT syndrome                                                               | not provided                                        | no assertion provided                                | VCV000067276 | 7                | 150951606      | 67276       | 78172       | rs199472933  | Neutral    | 0.382    | 0.415        | 0.204    |
| KCNH2 | 256 | P   | R   | NM_000238.4(KCNH2):c.1787C>G (p.Pro596Arg) | Congenital long QT syndrome                                                               | not provided                                        | no assertion provided                                | VCV000067275 | 7                | 150951606      | 67275       | 78171       | rs199472933  | Neutral    | 0.453    | 0.278        | 0.268    |
| KCNH2 | 257 | N   | H   | NM_000238.4(KCNH2):c.769A>C (p.Asn257His)  | not provided                                                                              | Uncertain significance(Last reviewed: Nov 12, 2018) | criteria provided, single submitter                  | VCV000067526 | 7                | 150958206      | 67526       | 78422       | rs199472875  | Neutral    | 0.347    | 0.333        | 0.32     |
| KCNH2 | 257 | Y   | C   | NM_000238.4(KCNH2):c.1790A>G (p.Tyr597Cys) | Long QT syndrome Congenital long QT syndrome not provided                                 | Likely pathogenic(Last reviewed: Nov 18, 2015)      | criteria provided, multiple submitters, no conflicts | VCV000067277 | 7                | 150951603      | 67277       | 78173       | rs199472934  | Neutral    | 0.411    | 0.389        | 0.2      |
| KCNH2 | 258 | P   | L   | NM_000238.4(KCNH2):c.773C>T (p.Pro258Leu)  | not provided                                                                              | Uncertain significance(Last reviewed: Dec 19, 2016) | criteria provided, single submitter                  | VCV000495747 | 7                | 150958202      | 495747      | 487314      | rs1367019959 | Neutral    | 0.349    | 0.366        | 0.285    |
| KCNH2 | 258 | P   | S   | NM_000238.4(KCNH2):c.772C>T (p.Pro258Ser)  | Long QT syndrome                                                                          | Uncertain significance(Last reviewed: Feb 17, 2020) | criteria provided, single submitter                  | VCV001060097 | 7                | 150958203      | 1060097     | 1044811     | NA           | GOF        | 0.346    | 0.302        | 0.352    |
| KCNH2 | 259 | D   | N   | NM_000238.4(KCNH2):c.775G>A (p.Asp259Asn)  | not provided Congenital long QT syndrome Long QT syndrome                                 | Uncertain significance(Last reviewed: May 20, 2020) | criteria provided, multiple submitters, no conflicts | VCV000067527 | 7                | 150958200      | 67527       | 78423       | rs199472876  | GOF        | 0.395    | 0.234        | 0.371    |
| KCNH2 | 259 | S   | N   | NM_000238.4(KCNH2):c.1796G>A (p.Ser599Asn) | Arrhythmia                                                                                | Uncertain significance(Last reviewed: Dec 21, 2020) | criteria provided, single submitter                  | VCV001172277 | 7                | 150951597      | 1172277     | 1160697     | NA           | GOF        | 0.385    | 0.248        | 0.367    |
| KCNH2 | 259 | S   | R   | NM_000238.4(KCNH2):c.1797C>A (p.Ser599Arg) | Congenital long QT syndrome                                                               | not provided                                        | no assertion provided                                | VCV000067278 | 7                | 150951596      | 67278       | 78174       | rs199472935  | GOF        | 0.39     | 0.233        | 0.377    |
| KCNH2 | 260 | A   | P   | NM_000238.4(KCNH2):c.778G>C (p.Ala260Pro)  | Hypertrophic cardiomyopathy Long QT syndrome                                              | Uncertain significance(Last reviewed: Oct 17, 2018) | criteria provided, multiple submitters, no conflicts | VCV000427970 | 7                | 150958197      | 427970      | 419276      | rs1220897906 | Neutral    | 0.45     | 0.259        | 0.291    |
| KCNH2 | 260 | A   | V   | NM_000238.4(KCNH2):c.779C>T (p.Ala260Val)  | Long QT syndrome                                                                          | Uncertain significance(Last reviewed: Mar 26, 2018) | criteria provided, single submitter                  | VCV000571094 | 7                | 150958196      | 571094      | 561740      | rs1228602666 | Neutral    | 0.365    | 0.344        | 0.292    |
| KCNH2 | 261 | G   | C   | NM_000238.4(KCNH2):c.1801G>T (p.Gly601Cys) | Congenital long QT syndrome                                                               | not provided                                        | no assertion provided                                | VCV000067280 | 7                | 150951592      | 67280       | 78176       | rs199472936  | Neutral    | 0.394    | 0.331        | 0.275    |
| KCNH2 | 261 | G   | D   | NM_000238.4(KCNH2):c.1802G>A (p.Gly601Asp) | not provided                                                                              | Likely pathogenic(Last reviewed: Jul 14, 2021)      | criteria provided, single submitter                  | VCV000200730 | 7                | 150951591      | 200730      | 197255      | rs794728480  | GOF        | 0.445    | 0.223        | 0.332    |
| KCNH2 | 261 | G   | S   | NM_000238.4(KCNH2):c.1801G>A (p.Gly601Ser) | Long QT syndrome 2 Long QT syndrome  Cardiovascular phenotype Congenital long QT syndrome | Pathogenic(Last reviewed: Oct 5, 2020)              | criteria provided, multiple                          | VCV000067279 | 7                | 150951592      | 67279       | 78175       | rs199472936  | GOF        | 0.39     | 0.262        | 0.348    |

| gene  | pos | aa1 | aa2 | Name                                       | Condition(s)                                                                      | Clinical significance (Last reviewed)                                     | Review status                                        | Accession    | GRCh38Chromosome | GRCh38Location | VariationID | AlleleID(s) | dbSNP ID     | prediction | prob.LOF | prob.Neutral | prob.GOF |
|-------|-----|-----|-----|--------------------------------------------|-----------------------------------------------------------------------------------|---------------------------------------------------------------------------|------------------------------------------------------|--------------|------------------|----------------|-------------|-------------|--------------|------------|----------|--------------|----------|
|       |     |     |     |                                            |                                                                                   |                                                                           | submitters, no conflicts                             |              |                  |                |             |             |              |            |          |              |          |
| KCNH2 | 262 | L   | P   | NM_000238.4(KCNH2):c.1805T>C (p.Leu602Pro) | Long QT syndrome Cardiovascular phenotype not specified not provided              | Conflicting interpretations of pathogenicity(Last reviewed: Jun 8, 2020)  | criteria provided, conflicting interpretations       | VCV000234996 | 7                | 150951588      | 234996      | 236770      | rs876661348  | Neutral    | 0.525    | 0.258        | 0.217    |
| KCNH2 | 263 | G   | D   | NM_000238.4(KCNH2):c.1808G>A (p.Gly603Asp) | Long QT syndrome                                                                  | Uncertain significance(Last reviewed: Apr 8, 2020)                        | criteria provided, single submitter                  | VCV000456894 | 7                | 150951585      | 456894      | 457544      | rs1554425806 | GOF        | 0.49     | 0.22         | 0.29     |
| KCNH2 | 264 | G   | D   | NM_000238.4(KCNH2):c.1811G>A (p.Gly604Asp) | Congenital long QT syndrome                                                       | not provided                                                              | no assertion provided                                | VCV000067282 | 7                | 150951582      | 67282       | 78178       | rs199472937  | Neutral    | 0.472    | 0.237        | 0.291    |
| KCNH2 | 264 | G   | S   | NM_000238.4(KCNH2):c.1810G>A (p.Gly604Ser) | Congenital long QT syndrome Long QT syndrome Inborn genetic diseases not provided | Pathogenic(Last reviewed: Oct 29, 2020)                                   | criteria provided, multiple submitters, no conflicts | VCV000067281 | 7                | 150951583      | 67281       | 78177       | rs199473522  | Neutral    | 0.412    | 0.295        | 0.293    |
| KCNH2 | 264 | G   | V   | NM_000238.4(KCNH2):c.1811G>T (p.Gly604Val) | not provided                                                                      | Likely pathogenic(Last reviewed: Jan 3, 2018)                             | criteria provided, single submitter                  | VCV000200741 | 7                | 150951582      | 200741      | 197254      | rs199472937  | Neutral    | 0.389    | 0.342        | 0.269    |
| KCNH2 | 265 | P   | L   | NM_000238.4(KCNH2):c.1814C>T (p.Pro605Leu) | Long QT syndrome 2 Long QT syndrome Congenital long QT syndrome                   | Conflicting interpretations of pathogenicity(Last reviewed: Jul 11, 2018) | criteria provided, conflicting interpretations       | VCV000067284 | 7                | 150951579      | 67284       | 78180       | rs199472938  | Neutral    | 0.393    | 0.426        | 0.181    |
| KCNH2 | 265 | P   | S   | NM_000238.4(KCNH2):c.1813C>T (p.Pro605Ser) | Congenital long QT syndrome                                                       | not provided                                                              | no assertion provided                                | VCV000067283 | 7                | 150951580      | 67283       | 78179       | rs199472939  | Neutral    | 0.412    | 0.39         | 0.198    |
| KCNH2 | 266 | S   | I   | NM_000238.4(KCNH2):c.797G>T (p.Ser266Ile)  | Long QT syndrome                                                                  | Uncertain significance(Last reviewed: Oct 9, 2020)                        | criteria provided, single submitter                  | VCV001060485 | 7                | 150958178      | 1060485     | 1044810     | NA           | Neutral    | 0.384    | 0.429        | 0.187    |
| KCNH2 | 266 | S   | P   | NM_000238.4(KCNH2):c.1816T>C (p.Ser606Pro) | Congenital long QT syndrome                                                       | not provided                                                              | no assertion provided                                | VCV000067285 | 7                | 150951577      | 67285       | 78181       | rs199473523  | Neutral    | 0.491    | 0.306        | 0.202    |
| KCNH2 | 267 | I   | F   | NM_000238.4(KCNH2):c.1819A>T (p.Ile607Phe) | not provided                                                                      | Likely pathogenic(Last reviewed: Jan 2, 2015)                             | criteria provided, single submitter                  | VCV000418245 | 7                | 150951574      | 418245      | 407061      | rs1064793146 | Neutral    | 0.492    | 0.37         | 0.138    |
| KCNH2 | 268 | A   | D   | NM_000238.4(KCNH2):c.803C>A (p.Ala268Asp)  | Long QT syndrome                                                                  | Uncertain significance(Last reviewed: Sep 4, 2019)                        | criteria provided, single submitter                  | VCV000941477 | 7                | 150958172      | 941477      | 933780      | rs1241943196 | Neutral    | 0.552    | 0.263        | 0.185    |
| KCNH2 | 269 | D   | A   | NM_000238.4(KCNH2):c.1826A>C (p.Asp609Ala) | Long QT syndrome                                                                  | Uncertain significance(Last reviewed: Mar 9, 2017)                        | criteria provided, single submitter                  | VCV000456895 | 7                | 150951567      | 456895      | 456493      | rs199472940  | Neutral    | 0.356    | 0.371        | 0.272    |
| KCNH2 | 269 | D   | G   | NM_000238.4(KCNH2):c.1826A>G (p.Asp609Gly) | Congenital long QT syndrome Long QT syndrome                                      | Uncertain significance(Last reviewed: Jun 7, 2019)                        | criteria provided, single submitter                  | VCV000067289 | 7                | 150951567      | 67289       | 78185       | rs199472940  | Neutral    | 0.419    | 0.31         | 0.27     |
| KCNH2 | 269 | D   | H   | NM_000238.4(KCNH2):c.1825G>C (p.Asp609His) | Congenital long QT syndrome                                                       | not provided                                                              | no assertion provided                                | VCV000067287 | 7                | 150951568      | 67287       | 78183       | rs199472941  | Neutral    | 0.37     | 0.337        | 0.293    |
| KCNH2 | 269 | D   | N   | NM_000238.4(KCNH2):c.1825G>A (p.Asp609Asn) | Congenital long QT syndrome Long QT syndrome not provided                         | Pathogenic(Last reviewed: Aug 22, 2019)                                   | criteria provided, multiple submitters, no conflicts | VCV000067286 | 7                | 150951568      | 67286       | 78182       | rs199472941  | Neutral    | 0.419    | 0.274        | 0.307    |
| KCNH2 | 269 | D   | Y   | NM_000238.4(KCNH2):c.1825G>T (p.Asp609Tyr) | Congenital long QT syndrome                                                       | not provided                                                              | no assertion provided                                | VCV000067288 | 7                | 150951568      | 67288       | 78184       | rs199472941  | Neutral    | 0.351    | 0.361        | 0.289    |

| gene  | pos | aa1 | aa2 | Name                                       | Condition(s)                                                                                                              | Clinical significance (Last reviewed)                     | Review status                                        | Accession    | GRCh38Chromosome | GRCh38Location | VariationID | AlleleID(s) | dbSNP ID     | prediction | prob.LOF | prob.Neutral | prob.GOF |
|-------|-----|-----|-----|--------------------------------------------|---------------------------------------------------------------------------------------------------------------------------|-----------------------------------------------------------|------------------------------------------------------|--------------|------------------|----------------|-------------|-------------|--------------|------------|----------|--------------|----------|
| KCNH2 | 269 | R   | W   | NM_000238.4(KCNH2):c.805C>T (p.Arg269Trp)  | Congenital long QT syndrome                                                                                               | not provided                                              | no assertion provided                                | VCV000067529 | 7                | 150958170      | 67529       | 78425       | rs199473503  | Neutral    | 0.367    | 0.434        | 0.2      |
| KCNH2 | 270 | K   | E   | NM_000238.4(KCNH2):c.1828A>G (p.Lys610Glu) | Long QT syndrome                                                                                                          | Likely pathogenic(Last reviewed: May 16, 2020)            | criteria provided, single submitter                  | VCV001066309 | 7                | 150951565      | 1066309     | 1055669     | NA           | Neutral    | 0.49     | 0.328        | 0.182    |
| KCNH2 | 271 | R   | H   | NM_000238.4(KCNH2):c.812G>A (p.Arg271His)  | not provided                                                                                                              | Uncertain significance(Last reviewed: Jul 7, 2014)        | criteria provided, single submitter                  | VCV000200304 | 7                | 150958163      | 200304      | 197312      | rs794728361  | Neutral    | 0.385    | 0.388        | 0.227    |
| KCNH2 | 271 | Y   | C   | NM_000238.4(KCNH2):c.1832A>G (p.Tyr611Cys) | Long QT syndrome                                                                                                          | Uncertain significance(Last reviewed: Aug 22, 2020)       | criteria provided, single submitter                  | VCV001019935 | 7                | 150951561      | 1019935     | 1007347     | rs1801163462 | Neutral    | 0.414    | 0.405        | 0.181    |
| KCNH2 | 271 | Y   | D   | NM_000238.4(KCNH2):c.1831T>G (p.Tyr611Asp) | Congenital long QT syndrome Long QT syndrome                                                                              | Likely pathogenic                                         | no assertion criteria provided                       | VCV000067290 | 7                | 150951562      | 67290       | 78186       | rs199472942  | Neutral    | 0.499    | 0.296        | 0.205    |
| KCNH2 | 272 | V   | L   | NM_000238.4(KCNH2):c.1834G>T (p.Val612Leu) | Congenital long QT syndrome                                                                                               | not provided                                              | no assertion provided                                | VCV000067291 | 7                | 150951559      | 67291       | 78187       | rs199472943  | Neutral    | 0.52     | 0.316        | 0.163    |
| KCNH2 | 273 | R   | G   | NM_000238.4(KCNH2):c.817C>G (p.Arg273Gly)  | Long QT syndrome                                                                                                          | Uncertain significance(Last reviewed: Oct 27, 2020)       | criteria provided, single submitter                  | VCV001044178 | 7                | 150958158      | 1044178     | 1027897     | rs552583527  | Neutral    | 0.533    | 0.264        | 0.203    |
| KCNH2 | 273 | R   | Q   | NM_000238.4(KCNH2):c.818G>A (p.Arg273Gln)  | SUDDEN INFANT DEATH SYNDROME                                                                                              | not provided                                              | no assertion provided                                | VCV000067531 | 7                | 150958157      | 67531       | 78427       | rs199472877  | Neutral    | 0.509    | 0.259        | 0.233    |
| KCNH2 | 273 | T   | M   | NM_000238.4(KCNH2):c.1838C>T (p.Thr613Met) | Long QT syndrome Cardiovascular phenotype Short QT syndrome 1 not provided Congenital long QT syndrome Long QT syndrome 2 | Pathogenic/Likely pathogenic(Last reviewed: Sep 20, 2020) | criteria provided, multiple submitters, no conflicts | VCV000067292 | 7                | 150951555      | 67292       | 78188       | rs199473524  | Neutral    | 0.413    | 0.397        | 0.19     |
| KCNH2 | 273 | T   | S   | NM_000238.4(KCNH2):c.1837A>T (p.Thr613Ser) | not provided                                                                                                              | Pathogenic(Last reviewed: Sep 12, 2014)                   | criteria provided, single submitter                  | VCV000200743 | 7                | 150951556      | 200743      | 197252      | rs794728485  | Neutral    | 0.47     | 0.321        | 0.209    |
| KCNH2 | 275 | L   | F   | NM_000238.4(KCNH2):c.1843C>T (p.Leu615Phe) | Congenital long QT syndrome not provided                                                                                  | Likely pathogenic(Last reviewed: Aug 6, 2020)             | criteria provided, single submitter                  | VCV000067294 | 7                | 150951550      | 67294       | 78190       | rs199472945  | Neutral    | 0.629    | 0.252        | 0.119    |
| KCNH2 | 275 | L   | V   | NM_000238.4(KCNH2):c.1843C>G (p.Leu615Val) | Congenital long QT syndrome                                                                                               | not provided                                              | no assertion provided                                | VCV000067293 | 7                | 150951550      | 67293       | 78189       | rs199472945  | Neutral    | 0.634    | 0.245        | 0.121    |
| KCNH2 | 275 | S   | R   | NM_000238.4(KCNH2):c.823A>C (p.Ser275Arg)  | Long QT syndrome                                                                                                          | Uncertain significance(Last reviewed: Apr 8, 2020)        | criteria provided, single submitter                  | VCV000577151 | 7                | 150958152      | 577151      | 566583      | rs1268162009 | Neutral    | 0.627    | 0.172        | 0.201    |
| KCNH2 | 275 | S   | R   | NM_000238.4(KCNH2):c.823A>C (p.Ser275Arg)  | Long QT syndrome                                                                                                          | Uncertain significance(Last reviewed: Apr 8, 2020)        | criteria provided, single submitter                  | VCV000577151 | 7                | 150958152      | 577151      | 566583      | rs1268162009 | Neutral    | 0.627    | 0.172        | 0.201    |
| KCNH2 | 275 | S   | R   | NM_000238.4(KCNH2):c.825C>G (p.Ser275Arg)  | Long QT syndrome 2                                                                                                        | Uncertain significance(Last reviewed: Jan 13, 2018)       | criteria provided, single submitter                  | VCV000911914 | 7                | 150958150      | 911914      | 897676      | rs1801442023 | Neutral    | 0.627    | 0.172        | 0.201    |
| KCNH2 | 275 | S   | R   | NM_000238.4(KCNH2):c.825C>G (p.Ser275Arg)  | Long QT syndrome 2                                                                                                        | Uncertain significance(Last reviewed: Jan 13, 2018)       | criteria provided, single submitter                  | VCV000911914 | 7                | 150958150      | 911914      | 897676      | rs1801442023 | Neutral    | 0.627    | 0.172        | 0.201    |
| KCNH2 | 276 | Y   | C   | NM_000238.4(KCNH2):c.1847A>G (p.Tyr616Cys) | Congenital long QT syndrome Long QT syndrome not provided                                                                 | Pathogenic/Likely pathogenic(Last reviewed: Apr 12, 2019) | criteria provided, multiple submitters, no conflicts | VCV000067295 | 7                | 150951546      | 67295       | 78191       | rs199472946  | Neutral    | 0.481    | 0.357        | 0.162    |
| KCNH2 | 277 | A   | D   | NM_000238.4(KCNH2):c.830C>A (p.Ala277Asp)  | Congenital long QT syndrome Long QT syndrome                                                                              | Uncertain significance(Last reviewed: Apr 12, 2019)       | criteria provided, single submitter                  | VCV000067533 | 7                | 150958145      | 67533       | 78429       | rs199472878  | Neutral    | 0.496    | 0.258        | 0.246    |

| gene  | pos | aa1 | aa2 | Name                                       | Condition(s)                                                                                           | Clinical significance (Last reviewed)                                     | Review status                                  | Accession    | GRCh38Chromosome | GRCh38Location | VariationID | AlleleID(s) | dbSNP ID     | prediction | prob.LOF | prob.Neutral | prob.GOF |
|-------|-----|-----|-----|--------------------------------------------|--------------------------------------------------------------------------------------------------------|---------------------------------------------------------------------------|------------------------------------------------|--------------|------------------|----------------|-------------|-------------|--------------|------------|----------|--------------|----------|
|       |     |     |     |                                            |                                                                                                        | reviewed: Feb 2, 2020)                                                    | submitter                                      |              |                  |                |             |             |              |            |          |              |          |
| KCNH2 | 277 | A   | S   | NM_000238.4(KCNH2):c.829G>T (p.Ala277Ser)  | Long QT syndrome                                                                                       | Uncertain significance(Last reviewed: Jan 22, 2019)                       | criteria provided, single submitter            | VCV000834430 | 7                | 150958146      | 834430      | 833351      | rs1801441796 | Neutral    | 0.422    | 0.337        | 0.242    |
| KCNH2 | 277 | F   | L   | NM_000238.4(KCNH2):c.1849T>C (p.Phe617Leu) | Long QT syndrome                                                                                       | Uncertain significance(Last reviewed: Mar 6, 2019)                        | criteria provided, single submitter            | VCV000207940 | 7                | 150951544      | 207940      | 204115      | rs796052195  | Neutral    | 0.468    | 0.349        | 0.184    |
| KCNH2 | 277 | F   | L   | NM_000238.4(KCNH2):c.1849T>C (p.Phe617Leu) | Long QT syndrome                                                                                       | Uncertain significance(Last reviewed: Mar 6, 2019)                        | criteria provided, single submitter            | VCV000207940 | 7                | 150951544      | 207940      | 204115      | rs796052195  | Neutral    | 0.468    | 0.349        | 0.184    |
| KCNH2 | 277 | F   | L   | NM_000238.4(KCNH2):c.1851C>A (p.Phe617Leu) | not provided                                                                                           | Likely pathogenic(Last reviewed: Mar 30, 2017)                            | criteria provided, single submitter            | VCV000392690 | 7                | 150951542      | 392690      | 369332      | rs1057524595 | Neutral    | 0.468    | 0.349        | 0.184    |
| KCNH2 | 277 | F   | L   | NM_000238.4(KCNH2):c.1851C>A (p.Phe617Leu) | not provided                                                                                           | Likely pathogenic(Last reviewed: Mar 30, 2017)                            | criteria provided, single submitter            | VCV000392690 | 7                | 150951542      | 392690      | 369332      | rs1057524595 | Neutral    | 0.468    | 0.349        | 0.184    |
| KCNH2 | 278 | S   | C   | NM_000238.4(KCNH2):c.832A>T (p.Ser278Cys)  | Long QT syndrome                                                                                       | Uncertain significance(Last reviewed: Feb 18, 2020)                       | criteria provided, single submitter            | VCV001026541 | 7                | 150958143      | 1026541     | 1007353     | rs1801441560 | Neutral    | 0.395    | 0.416        | 0.189    |
| KCNH2 | 278 | T   | I   | NM_000238.4(KCNH2):c.1853C>T (p.Thr618Ile) | Long QT syndrome short QT syndrome                                                                     | Likely pathogenic(Last reviewed: May 10, 2017)                            | criteria provided, single submitter            | VCV000067297 | 7                | 150951540      | 67297       | 78193       | rs199472947  | Neutral    | 0.399    | 0.422        | 0.179    |
| KCNH2 | 278 | T   | S   | NM_000238.4(KCNH2):c.1853C>G (p.Thr618Ser) | Congenital long QT syndrome                                                                            | not provided                                                              | no assertion provided                          | VCV000067296 | 7                | 150951540      | 67296       | 78192       | rs199472947  | Neutral    | 0.434    | 0.374        | 0.191    |
| KCNH2 | 279 | V   | M   | NM_000238.4(KCNH2):c.835G>A (p.Val279Met)  | SUDDEN INFANT DEATH SYNDROME                                                                           | not provided                                                              | no assertion provided                          | VCV000067534 | 7                | 150958140      | 67534       | 78430       | rs199472879  | Neutral    | 0.562    | 0.287        | 0.151    |
| KCNH2 | 280 | R   | C   | NM_000238.4(KCNH2):c.838C>T (p.Arg280Cys)  | Long QT syndrome                                                                                       | Uncertain significance(Last reviewed: May 18, 2019)                       | criteria provided, single submitter            | VCV000943502 | 7                | 150958137      | 943502      | 933779      | rs781669869  | Neutral    | 0.395    | 0.395        | 0.21     |
| KCNH2 | 280 | S   | G   | NM_000238.4(KCNH2):c.1858A>G (p.Ser620Gly) | not provided                                                                                           | Pathogenic(Last reviewed: Mar 5, 2021)                                    | criteria provided, single submitter            | VCV001189275 | 7                | 150951535      | 1189275     | 1180304     | NA           | Neutral    | 0.42     | 0.342        | 0.237    |
| KCNH2 | 280 | S   | N   | NM_000238.4(KCNH2):c.1859G>A (p.Ser620Asn) | Long QT syndrome                                                                                       | Uncertain significance(Last reviewed: Aug 9, 2020)                        | criteria provided, single submitter            | VCV001017668 | 7                | 150951534      | 1017668     | 1007346     | rs1801161235 | Neutral    | 0.415    | 0.317        | 0.268    |
| KCNH2 | 281 | S   | N   | NM_000238.4(KCNH2):c.1862G>A (p.Ser621Asn) | Congenital long QT syndrome Primary familial hypertrophic cardiomyopathy Long QT syndrome not provided | Conflicting interpretations of pathogenicity(Last reviewed: Mar 18, 2020) | criteria provided, conflicting interpretations | VCV000067299 | 7                | 150951531      | 67299       | 78195       | rs199472948  | Neutral    | 0.413    | 0.283        | 0.304    |
| KCNH2 | 281 | S   | R   | NM_000238.4(KCNH2):c.1863C>G (p.Ser621Arg) | Congenital long QT syndrome                                                                            | not provided                                                              | no assertion provided                          | VCV000067300 | 7                | 150951530      | 67300       | 78196       | rs199472949  | GOF        | 0.411    | 0.241        | 0.348    |
| KCNH2 | 282 | L   | F   | NM_000238.4(KCNH2):c.1864C>T (p.Leu622Phe) | Congenital long QT syndrome Long QT syndrome                                                           | Uncertain significance(Last reviewed: Mar 15, 2017)                       | criteria provided, single submitter            | VCV000067301 | 7                | 150951529      | 67301       | 78197       | rs199473525  | Neutral    | 0.547    | 0.322        | 0.131    |
| KCNH2 | 283 | T   | I   | NM_000238.4(KCNH2):c.1868C>T (p.Thr623Ile) | Congenital long QT syndrome                                                                            | not provided                                                              | no assertion provided                          | VCV000067302 | 7                | 150951525      | 67302       | 78198       | rs199472950  | Neutral    | 0.403    | 0.428        | 0.169    |
| KCNH2 | 285 | A   | S   | NM_000238.4(KCNH2):c.853G>T (p.Ala285Ser)  | Long QT syndrome                                                                                       | Uncertain                                                                 | criteria                                       | VCV000359315 | 7                | 150958122      | 359315      | 310199      | rs864622366  | Neutral    | 0.455    | 0.34         | 0.205    |

| gene  | pos | aa1 | aa2 | Name                                       | Condition(s)                                                | Clinical significance (Last reviewed)                     | Review status                                        | Accession    | GRCh38Chromosome | GRCh38Location | VariationID | AlleleID(s) | dbSNP ID     | prediction | prob.LOF | prob.Neutral | prob.GOF |
|-------|-----|-----|-----|--------------------------------------------|-------------------------------------------------------------|-----------------------------------------------------------|------------------------------------------------------|--------------|------------------|----------------|-------------|-------------|--------------|------------|----------|--------------|----------|
|       |     |     |     |                                            |                                                             | significance(Last reviewed: Jun 14, 2016)                 | provided, single submitter                           |              |                  |                |             |             |              |            |          |              |          |
| KCNH2 | 285 | A   | T   | NM_000238.4(KCNH2):c.853G>A (p.Ala285Thr)  | Long QT syndrome                                            | Uncertain significance(Last reviewed: Aug 29, 2015)       | criteria provided, single submitter                  | VCV000220070 | 7                | 150958122      | 220070      | 221674      | rs864622366  | Neutral    | 0.429    | 0.378        | 0.193    |
| KCNH2 | 285 | V   | A   | NM_000238.4(KCNH2):c.1874T>C (p.Val625Ala) | Long QT syndrome 2 Long QT syndrome                         | Likely pathogenic(Last reviewed: Nov 26, 2015)            | criteria provided, multiple submitters, no conflicts | VCV000222668 | 7                | 150951519      | 222668      | 224343      | rs199472951  | Neutral    | 0.461    | 0.378        | 0.161    |
| KCNH2 | 285 | V   | E   | NM_000238.4(KCNH2):c.1874T>A (p.Val625Glu) | Congenital long QT syndrome                                 | not provided                                              | no assertion provided                                | VCV000067303 | 7                | 150951519      | 67303       | 78199       | rs199472951  | Neutral    | 0.569    | 0.242        | 0.189    |
| KCNH2 | 285 | V   | L   | NM_000238.4(KCNH2):c.1873G>C (p.Val625Leu) | not provided                                                | Likely pathogenic(Last reviewed: Jun 26, 2017)            | criteria provided, single submitter                  | VCV000618184 | 7                | 150951520      | 618184      | 609660      | rs1563156725 | Neutral    | 0.467    | 0.367        | 0.167    |
| KCNH2 | 286 | G   | A   | NM_000238.4(KCNH2):c.1877G>C (p.Gly626Ala) | Congenital long QT syndrome                                 | not provided                                              | no assertion provided                                | VCV000067306 | 7                | 150951516      | 67306       | 78202       | rs199472952  | Neutral    | 0.406    | 0.337        | 0.258    |
| KCNH2 | 286 | G   | D   | NM_000238.4(KCNH2):c.1877G>A (p.Gly626Asp) | Congenital long QT syndrome                                 | not provided                                              | no assertion provided                                | VCV000067305 | 7                | 150951516      | 67305       | 78201       | rs199472952  | GOF        | 0.476    | 0.231        | 0.293    |
| KCNH2 | 286 | G   | S   | NM_000238.4(KCNH2):c.1876G>A (p.Gly626Ser) | Congenital long QT syndrome not provided Long QT syndrome 2 | Pathogenic/Likely pathogenic(Last reviewed: Dec 27, 2019) | criteria provided, multiple submitters, no conflicts | VCV000067304 | 7                | 150951517      | 67304       | 78200       | rs199472953  | Neutral    | 0.42     | 0.296        | 0.284    |
| KCNH2 | 286 | G   | V   | NM_000238.4(KCNH2):c.1877G>T (p.Gly626Val) | Congenital long QT syndrome                                 | not provided                                              | no assertion provided                                | VCV000067307 | 7                | 150951516      | 67307       | 78203       | rs199472952  | Neutral    | 0.397    | 0.341        | 0.262    |
| KCNH2 | 287 | F   | I   | NM_000238.4(KCNH2):c.1879T>A (p.Phe627Ile) | Congenital long QT syndrome                                 | not provided                                              | no assertion provided                                | VCV000067308 | 7                | 150951514      | 67308       | 78204       | rs199472954  | Neutral    | 0.445    | 0.404        | 0.151    |
| KCNH2 | 287 | F   | L   | NM_000238.4(KCNH2):c.1881C>A (p.Phe627Leu) | Long QT syndrome not provided                               | Pathogenic(Last reviewed: Apr 22, 2020)                   | criteria provided, multiple submitters, no conflicts | VCV000200747 | 7                | 150951512      | 200747      | 197251      | rs199473039  | Neutral    | 0.448    | 0.399        | 0.152    |
| KCNH2 | 287 | F   | L   | NM_000238.4(KCNH2):c.1881C>A (p.Phe627Leu) | Long QT syndrome not provided                               | Pathogenic(Last reviewed: Apr 22, 2020)                   | criteria provided, multiple submitters, no conflicts | VCV000200747 | 7                | 150951512      | 200747      | 197251      | rs199473039  | Neutral    | 0.448    | 0.399        | 0.152    |
| KCNH2 | 287 | F   | L   | NM_000238.4(KCNH2):c.1881C>A (p.Phe627Leu) | Long QT syndrome not provided                               | Pathogenic(Last reviewed: Apr 22, 2020)                   | criteria provided, multiple submitters, no conflicts | VCV000200747 | 7                | 150951512      | 200747      | 197251      | rs199473039  | Neutral    | 0.448    | 0.399        | 0.152    |
| KCNH2 | 287 | F   | L   | NM_000238.4(KCNH2):c.1881C>G (p.Phe627Leu) | Congenital long QT syndrome                                 | not provided                                              | no assertion provided                                | VCV000067310 | 7                | 150951512      | 67310       | 78206       | rs199473039  | Neutral    | 0.448    | 0.399        | 0.152    |
| KCNH2 | 287 | F   | L   | NM_000238.4(KCNH2):c.1881C>G (p.Phe627Leu) | Congenital long QT syndrome                                 | not provided                                              | no assertion provided                                | VCV000067310 | 7                | 150951512      | 67310       | 78206       | rs199473039  | Neutral    | 0.448    | 0.399        | 0.152    |
| KCNH2 | 287 | F   | L   | NM_000238.4(KCNH2):c.1881C>G (p.Phe627Leu) | Congenital long QT syndrome                                 | not provided                                              | no assertion provided                                | VCV000067310 | 7                | 150951512      | 67310       | 78206       | rs199473039  | Neutral    | 0.448    | 0.399        | 0.152    |
| KCNH2 | 287 | F   | L   | NM_000238.4(KCNH2):c.1879T>C (p.Phe627Leu) | Congenital long QT syndrome                                 | not provided                                              | no assertion provided                                | VCV000067309 | 7                | 150951514      | 67309       | 78205       | rs199472954  | Neutral    | 0.448    | 0.399        | 0.152    |
| KCNH2 | 287 | F   | L   | NM_000238.4(KCNH2):c.1879T>C (p.Phe627Leu) | Congenital long QT syndrome                                 | not provided                                              | no assertion provided                                | VCV000067309 | 7                | 150951514      | 67309       | 78205       | rs199472954  | Neutral    | 0.448    | 0.399        | 0.152    |
| KCNH2 | 287 | F   | L   | NM_000238.4(KCNH2):c.1879T>C (p.Phe627Leu) | Congenital long QT syndrome                                 | not provided                                              | no assertion provided                                | VCV000067309 | 7                | 150951514      | 67309       | 78205       | rs199472954  | Neutral    | 0.448    | 0.399        | 0.152    |



| gene  | pos | aa1 | aa2 | Name                                       | Condition(s)                                                                                                                                                | Clinical significance (Last reviewed)                                    | Review status                                        | Accession    | GRCh38Chromosome | GRCh38Location | VariationID | AlleleID(s) | dbSNP ID     | prediction | prob.LOF | prob.Neutral | prob.GOF |
|-------|-----|-----|-----|--------------------------------------------|-------------------------------------------------------------------------------------------------------------------------------------------------------------|--------------------------------------------------------------------------|------------------------------------------------------|--------------|------------------|----------------|-------------|-------------|--------------|------------|----------|--------------|----------|
| KCNH2 | 288 | G   | A   | NM_000238.4(KCNH2):c.1883G>C (p.Gly628Ala) | Congenital long QT syndrome                                                                                                                                 | not provided                                                             | no assertion provided                                | VCV000067311 | 7                | 150951510      | 67311       | 78207       | rs199472955  | Neutral    | 0.466    | 0.354        | 0.18     |
| KCNH2 | 288 | G   | R   | NM_000238.4(KCNH2):c.1882G>C (p.Gly628Arg) | not provided                                                                                                                                                | Likely pathogenic(Last reviewed: May 18, 2020)                           | criteria provided, single submitter                  | VCV000200749 | 7                | 150951511      | 200749      | 197250      | rs121912507  | Neutral    | 0.557    | 0.189        | 0.254    |
| KCNH2 | 288 | G   | V   | NM_000238.4(KCNH2):c.1883G>T (p.Gly628Val) | Congenital long QT syndrome                                                                                                                                 | not provided                                                             | no assertion provided                                | VCV000067312 | 7                | 150951510      | 67312       | 78208       | rs199472955  | Neutral    | 0.462    | 0.347        | 0.191    |
| KCNH2 | 288 | I   | T   | NM_000238.4(KCNH2):c.863T>C (p.Ile288Thr)  | Long QT syndrome 2                                                                                                                                          | Uncertain significance(Last reviewed: Sep 12, 2018)                      | criteria provided, single submitter                  | VCV000598780 | 7                | 150958112      | 598780      | 589837      | rs1563169608 | Neutral    | 0.543    | 0.32         | 0.137    |
| KCNH2 | 289 | E   | K   | NM_000238.4(KCNH2):c.865G>A (p.Glu289Lys)  | Long QT syndrome not specified not provided  Congenital long QT syndrome Long QT syndrome 2 Long QT syndrome 2 Short QT syndrome 1 Cardiovascular phenotype | Uncertain significance(Last reviewed: Sep 23, 2021)                      | criteria provided, multiple submitters, no conflicts | VCV000067535 | 7                | 150958110      | 67535       | 78431       | rs199472880  | GOF        | 0.421    | 0.256        | 0.323    |
| KCNH2 | 289 | N   | D   | NM_000238.4(KCNH2):c.1885A>G (p.Asn629Asp) | Congenital long QT syndrome not provided                                                                                                                    | Pathogenic(Last reviewed: Apr 9, 2015)                                   | criteria provided, single submitter                  | VCV000067313 | 7                | 150951508      | 67313       | 78209       | rs199472956  | Neutral    | 0.427    | 0.282        | 0.291    |
| KCNH2 | 289 | N   | I   | NM_000238.4(KCNH2):c.1886A>T (p.Asn629Ile) | Congenital long QT syndrome                                                                                                                                 | not provided                                                             | no assertion provided                                | VCV000067316 | 7                | 150951507      | 67316       | 78212       | rs199472957  | Neutral    | 0.323    | 0.429        | 0.249    |
| KCNH2 | 289 | N   | K   | NM_000238.4(KCNH2):c.1887C>A (p.Asn629Lys) | Congenital long QT syndrome                                                                                                                                 | not provided                                                             | no assertion provided                                | VCV000067317 | 7                | 150951506      | 67317       | 78213       | rs41307295   | Neutral    | 0.393    | 0.278        | 0.329    |
| KCNH2 | 289 | N   | S   | NM_000238.4(KCNH2):c.1886A>G (p.Asn629Ser) | Congenital long QT syndrome Long QT syndrome 2 Short QT syndrome 1 Long QT syndrome not provided Long QT syndrome 2                                         | Pathogenic(Last reviewed: Oct 31, 2018)                                  | criteria provided, multiple submitters, no conflicts | VCV000067315 | 7                | 150951507      | 67315       | 78211       | rs199472957  | Neutral    | 0.358    | 0.357        | 0.285    |
| KCNH2 | 289 | N   | T   | NM_000238.4(KCNH2):c.1886A>C (p.Asn629Thr) | Congenital long QT syndrome Long QT syndrome not provided                                                                                                   | Pathogenic/Likely pathogenic(Last reviewed: Jul 31, 2016)                | criteria provided, multiple submitters, no conflicts | VCV000067314 | 7                | 150951507      | 67314       | 78210       | rs199472957  | Neutral    | 0.329    | 0.399        | 0.272    |
| KCNH2 | 290 | A   | P   | NM_000238.4(KCNH2):c.868G>C (p.Ala290Pro)  | not provided                                                                                                                                                | Uncertain significance(Last reviewed: Oct 31, 2016)                      | criteria provided, single submitter                  | VCV000200306 | 7                | 150958107      | 200306      | 197308      | rs532891158  | Neutral    | 0.533    | 0.286        | 0.181    |
| KCNH2 | 290 | A   | S   | NM_000238.4(KCNH2):c.868G>T (p.Ala290Ser)  | Long QT syndrome                                                                                                                                            | Uncertain significance(Last reviewed: Jun 14, 2016)                      | criteria provided, single submitter                  | VCV000359314 | 7                | 150958107      | 359314      | 310317      | rs532891158  | Neutral    | 0.442    | 0.373        | 0.186    |
| KCNH2 | 290 | V   | A   | NM_000238.4(KCNH2):c.1889T>C (p.Val630Ala) | Congenital long QT syndrome                                                                                                                                 | not provided                                                             | no assertion provided                                | VCV000067319 | 7                | 150951504      | 67319       | 78215       | rs199473526  | Neutral    | 0.454    | 0.396        | 0.15     |
| KCNH2 | 290 | V   | I   | NM_000238.4(KCNH2):c.1888G>A (p.Val630Ile) | Long QT syndrome Long QT syndrome 2                                                                                                                         | Conflicting interpretations of pathogenicity(Last reviewed: Oct 6, 2020) | criteria provided, conflicting interpretations       | VCV000222669 | 7                | 150951505      | 222669      | 224342      | rs199472958  | Neutral    | 0.471    | 0.373        | 0.156    |
| KCNH2 | 290 | V   | L   | NM_000238.4(KCNH2):c.1888G>C (p.Val630Leu) | Congenital long QT syndrome                                                                                                                                 | not provided                                                             | no assertion provided                                | VCV000067318 | 7                | 150951505      | 67318       | 78214       | rs199472958  | Neutral    | 0.458    | 0.389        | 0.154    |
| KCNH2 | 291 | M   | R   | NM_000238.4(KCNH2):c.872T>G (p.Met291Arg)  | Long QT syndrome 2 Short QT syndrome 1 Long QT syndrome not provided                                                                                        | Uncertain significance(Last reviewed: Jul 17, 2020)                      | criteria provided, multiple submitters, no conflicts | VCV000374955 | 7                | 150958103      | 374955      | 361865      | rs199472881  | Neutral    | 0.637    | 0.185        | 0.177    |
| KCNH2 | 291 | M   | T   | NM_000238.4(KCNH2):c.872T>C (p.Met291Thr)  | Congenital long QT syndrome Long QT syndrome                                                                                                                | Uncertain significance(Last reviewed: Jul 6, 2018)                       | criteria provided, single submitter                  | VCV000067537 | 7                | 150958103      | 67537       | 78433       | rs199472881  | Neutral    | 0.561    | 0.273        | 0.166    |
| KCNH2 | 291 | S   | A   | NM_000238.4(KCNH2):c.1891T>G               | Congenital long QT syndrome                                                                                                                                 | not provided                                                             | no assertion                                         | VCV000067320 | 7                | 150951502      | 67320       | 78216       | rs199472959  | Neutral    | 0.479    | 0.338        | 0.183    |

| gene  | pos | aa1 | aa2 | Name                                               | Condition(s)                                                                                          | Clinical significance (Last reviewed)                     | Review status                                        | Accession    | GRCh38Chromosome | GRCh38Location        | VariationID | AlleleID(s) | dbSNP ID     | prediction | prob.LOF | prob.Neutral | prob.GOF |
|-------|-----|-----|-----|----------------------------------------------------|-------------------------------------------------------------------------------------------------------|-----------------------------------------------------------|------------------------------------------------------|--------------|------------------|-----------------------|-------------|-------------|--------------|------------|----------|--------------|----------|
|       |     |     |     | (p.Ser631Ala)                                      |                                                                                                       |                                                           | provided                                             |              |                  |                       |             |             |              |            |          |              |          |
| KCNH2 | 292 | P   | A   | NM_000238.4(KCNH2):c.1894C>G (p.Pro632Ala)         | Long QT syndrome                                                                                      | Uncertain significance(Last reviewed: Sep 24, 2020)       | criteria provided, single submitter                  | VCV001054005 | 7                | 150951499             | 1054005     | 1044806     | NA           | Neutral    | 0.353    | 0.404        | 0.243    |
| KCNH2 | 292 | P   | S   | NM_000238.4(KCNH2):c.1894C>T (p.Pro632Ser)         | Congenital long QT syndrome Cardiovascular phenotype not provided                                     | Pathogenic/Likely pathogenic(Last reviewed: Sep 17, 2019) | criteria provided, multiple submitters, no conflicts | VCV000067321 | 7                | 150951499             | 67321       | 78217       | rs199473527  | Neutral    | 0.36     | 0.371        | 0.269    |
| KCNH2 | 292 | R   | H   | NM_000238.4(KCNH2):c.875G>A (p.Arg292His)          | Long QT syndrome                                                                                      | Uncertain significance(Last reviewed: Aug 7, 2020)        | criteria provided, single submitter                  | VCV001017664 | 7                | 150958100             | 1017664     | 1007352     | rs1355952300 | Neutral    | 0.369    | 0.384        | 0.247    |
| KCNH2 | 293 | A   | F   | NM_000238.4(KCNH2):c.877_878delinsTT (p.Ala293Phe) | Long QT syndrome                                                                                      | Uncertain significance(Last reviewed: Sep 2, 2019)        | criteria provided, single submitter                  | VCV000963108 | 7                | 150958097 - 150958098 | 963108      | 945527      | rs1801438942 | Neutral    | 0.331    | 0.427        | 0.242    |
| KCNH2 | 293 | A   | S   | NM_000238.4(KCNH2):c.877G>T (p.Ala293Ser)          | not provided                                                                                          | Uncertain significance(Last reviewed: Apr 1, 2014)        | criteria provided, single submitter                  | VCV000200308 | 7                | 150958098             | 200308      | 197307      | rs794728362  | Neutral    | 0.36     | 0.342        | 0.298    |
| KCNH2 | 293 | A   | T   | NM_000238.4(KCNH2):c.877G>A (p.Ala293Thr)          | Long QT syndrome                                                                                      | Uncertain significance(Last reviewed: Feb 27, 2020)       | criteria provided, single submitter                  | VCV000864669 | 7                | 150958098             | 864669      | 833350      | rs794728362  | Neutral    | 0.339    | 0.373        | 0.288    |
| KCNH2 | 293 | N   | D   | NM_000238.4(KCNH2):c.1897A>G (p.Asn633Asp)         | Congenital long QT syndrome                                                                           | not provided                                              | no assertion provided                                | VCV000067322 | 7                | 150951496             | 67322       | 78218       | rs199472960  | GOF        | 0.4      | 0.269        | 0.332    |
| KCNH2 | 293 | N   | H   | NM_000238.4(KCNH2):c.1897A>C (p.Asn633His)         | Long QT syndrome                                                                                      | Uncertain significance(Last reviewed: Apr 27, 2020)       | criteria provided, single submitter                  | VCV001001814 | 7                | 150951496             | 1001814     | 992195      | rs199472960  | Neutral    | 0.333    | 0.333        | 0.333    |
| KCNH2 | 293 | N   | I   | NM_000238.4(KCNH2):c.1898A>T (p.Asn633Ile)         | Congenital long QT syndrome                                                                           | not provided                                              | no assertion provided                                | VCV000067324 | 7                | 150951495             | 67324       | 78220       | rs199472961  | Neutral    | 0.311    | 0.402        | 0.287    |
| KCNH2 | 293 | N   | S   | NM_000238.4(KCNH2):c.1898A>G (p.Asn633Ser)         | Congenital long QT syndrome Long QT syndrome Cardiovascular phenotype not provided Long QT syndrome 2 | Pathogenic/Likely pathogenic(Last reviewed: Jan 24, 2020) | criteria provided, multiple submitters, no conflicts | VCV000067323 | 7                | 150951495             | 67323       | 78219       | rs199472961  | Neutral    | 0.339    | 0.318        | 0.342    |
| KCNH2 | 294 | G   | R   | NM_000238.4(KCNH2):c.880G>A (p.Gly294Arg)          | Long QT syndrome                                                                                      | Uncertain significance(Last reviewed: Dec 19, 2019)       | criteria provided, single submitter                  | VCV000838034 | 7                | 150958095             | 838034      | 833349      | rs1801438642 | GOF        | 0.42     | 0.202        | 0.378    |
| KCNH2 | 294 | G   | V   | NM_000238.4(KCNH2):c.881G>T (p.Gly294Val)          | Long QT syndrome SUDDEN INFANT DEATH SYNDROME                                                         | Uncertain significance(Last reviewed: Feb 14, 2019)       | criteria provided, single submitter                  | VCV000067539 | 7                | 150958094             | 67539       | 78435       | rs199473549  | Neutral    | 0.359    | 0.328        | 0.313    |
| KCNH2 | 294 | T   | A   | NM_000238.4(KCNH2):c.1900A>G (p.Thr634Ala)         | not provided                                                                                          | Pathogenic(Last reviewed: May 28, 2014)                   | criteria provided, single submitter                  | VCV000200391 | 7                | 150951493             | 200391      | 197249      | rs794728377  | Neutral    | 0.315    | 0.414        | 0.271    |
| KCNH2 | 294 | T   | I   | NM_000238.4(KCNH2):c.1901C>T (p.Thr634Ile)         | Congenital long QT syndrome Long QT syndrome                                                          | Uncertain significance(Last reviewed: Oct 25, 2020)       | criteria provided, single submitter                  | VCV000067325 | 7                | 150951492             | 67325       | 78221       | rs199472962  | Neutral    | 0.306    | 0.441        | 0.253    |
| KCNH2 | 295 | N   | D   | NM_000238.4(KCNH2):c.1903A>G (p.Asn635Asp)         | Congenital long QT syndrome                                                                           | not provided                                              | no assertion provided                                | VCV000067326 | 7                | 150951490             | 67326       | 78222       | rs199472963  | GOF        | 0.392    | 0.262        | 0.346    |
| KCNH2 | 295 | N   | I   | NM_000238.4(KCNH2):c.1904A>T (p.Asn635Ile)         | Congenital long QT syndrome Long QT syndrome                                                          | Uncertain significance(Last reviewed: Aug 6, 2019)        | criteria provided, single submitter                  | VCV000067327 | 7                | 150951489             | 67327       | 78223       | rs199472964  | Neutral    | 0.309    | 0.388        | 0.303    |

| gene  | pos | aa1 | aa2 | Name                                       | Condition(s)                                              | Clinical significance (Last reviewed)                                     | Review status                                        | Accession    | GRCh38Chromosome | GRCh38Location | VariationID | AlleleID(s) | dbSNP ID     | prediction | prob.LOF | prob.Neutral | prob.GOF |
|-------|-----|-----|-----|--------------------------------------------|-----------------------------------------------------------|---------------------------------------------------------------------------|------------------------------------------------------|--------------|------------------|----------------|-------------|-------------|--------------|------------|----------|--------------|----------|
| KCNH2 | 295 | N   | K   | NM_000238.4(KCNH2):c.1905C>G (p.Asn635Lys) | Congenital long QT syndrome                               | not provided                                                              | no assertion provided                                | VCV000067328 | 7                | 150951488      | 67328       | 78224       | rs199472965  | GOF        | 0.357    | 0.251        | 0.391    |
| KCNH2 | 295 | N   | S   | NM_000238.4(KCNH2):c.1904A>G (p.Asn635Ser) | Long QT syndrome                                          | Uncertain significance(Last reviewed: Feb 7, 2018)                        | criteria provided, single submitter                  | VCV000200393 | 7                | 150951489      | 200393      | 197248      | rs199472964  | GOF        | 0.335    | 0.298        | 0.367    |
| KCNH2 | 296 | S   | L   | NM_000238.4(KCNH2):c.1907C>T (p.Ser636Leu) | not provided                                              | Uncertain significance(Last reviewed: Feb 18, 2020)                       | criteria provided, single submitter                  | VCV001303526 | 7                | 150951486      | 1303526     | 1293803     | NA           | Neutral    | 0.329    | 0.375        | 0.296    |
| KCNH2 | 297 | E   | D   | NM_000238.4(KCNH2):c.1911G>C (p.Glu637Asp) | Congenital long QT syndrome                               | not provided                                                              | no assertion provided                                | VCV000067331 | 7                | 150951482      | 67331       | 78227       | rs199472966  | GOF        | 0.429    | 0.245        | 0.326    |
| KCNH2 | 297 | E   | G   | NM_000238.4(KCNH2):c.1910A>G (p.Glu637Gly) | Congenital long QT syndrome                               | not provided                                                              | no assertion provided                                | VCV000067330 | 7                | 150951483      | 67330       | 78226       | rs199472967  | Neutral    | 0.403    | 0.297        | 0.301    |
| KCNH2 | 297 | E   | K   | NM_000238.4(KCNH2):c.1909G>A (p.Glu637Lys) | Congenital long QT syndrome Long QT syndrome              | Pathogenic(Last reviewed: Apr 26, 2018)                                   | criteria provided, single submitter                  | VCV000067329 | 7                | 150951484      | 67329       | 78225       | rs199472968  | GOF        | 0.399    | 0.234        | 0.367    |
| KCNH2 | 297 | P   | S   | NM_000238.4(KCNH2):c.889C>T (p.Pro297Ser)  | Long QT syndrome not provided Congenital long QT syndrome | Uncertain significance(Last reviewed: Sep 2, 2020)                        | criteria provided, multiple submitters, no conflicts | VCV000067540 | 7                | 150958086      | 67540       | 78436       | rs199472882  | Neutral    | 0.347    | 0.338        | 0.315    |
| KCNH2 | 298 | K   | E   | NM_000238.4(KCNH2):c.1912A>G (p.Lys638Glu) | Congenital long QT syndrome                               | not provided                                                              | no assertion provided                                | VCV000067332 | 7                | 150951481      | 67332       | 78228       | rs199473528  | GOF        | 0.395    | 0.281        | 0.324    |
| KCNH2 | 298 | K   | N   | NM_000238.4(KCNH2):c.1914G>T (p.Lys638Asn) | Congenital long QT syndrome                               | not provided                                                              | no assertion provided                                | VCV000067333 | 7                | 150951479      | 67333       | 78229       | rs199472969  | GOF        | 0.354    | 0.293        | 0.352    |
| KCNH2 | 298 | K   | R   | NM_000238.4(KCNH2):c.1913A>G (p.Lys638Arg) | not provided                                              | Pathogenic(Last reviewed: Jan 10, 2014)                                   | criteria provided, single submitter                  | VCV000200395 | 7                | 150951480      | 200395      | 197246      | rs794728378  | GOF        | 0.385    | 0.252        | 0.363    |
| KCNH2 | 299 | P   | L   | NM_000238.4(KCNH2):c.896C>T (p.Pro299Leu)  | Long QT syndrome                                          | Uncertain significance(Last reviewed: Oct 4, 2018)                        | criteria provided, single submitter                  | VCV000641100 | 7                | 150958079      | 641100      | 635919      | rs1584865137 | Neutral    | 0.33     | 0.397        | 0.272    |
| KCNH2 | 300 | F   | L   | NM_000238.4(KCNH2):c.1920C>A (p.Phe640Leu) | Congenital long QT syndrome Long QT syndrome 2            | Pathogenic(Last reviewed: Jan 1, 2013)                                    | criteria provided, single submitter                  | VCV000067336 | 7                | 150951473      | 67336       | 78232       | rs199472970  | Neutral    | 0.438    | 0.349        | 0.213    |
| KCNH2 | 300 | F   | L   | NM_000238.4(KCNH2):c.1920C>A (p.Phe640Leu) | Congenital long QT syndrome Long QT syndrome 2            | Pathogenic(Last reviewed: Jan 1, 2013)                                    | criteria provided, single submitter                  | VCV000067336 | 7                | 150951473      | 67336       | 78232       | rs199472970  | Neutral    | 0.438    | 0.349        | 0.213    |
| KCNH2 | 300 | F   | L   | NM_000238.4(KCNH2):c.1920C>A (p.Phe640Leu) | Congenital long QT syndrome Long QT syndrome 2            | Pathogenic(Last reviewed: Jan 1, 2013)                                    | criteria provided, single submitter                  | VCV000067336 | 7                | 150951473      | 67336       | 78232       | rs199472970  | Neutral    | 0.438    | 0.349        | 0.213    |
| KCNH2 | 300 | F   | L   | NM_000238.4(KCNH2):c.1920C>G (p.Phe640Leu) | not provided                                              | Pathogenic(Last reviewed: Mar 3, 2017)                                    | criteria provided, single submitter                  | VCV000423753 | 7                | 150951473      | 423753      | 407059      | rs199472970  | Neutral    | 0.438    | 0.349        | 0.213    |
| KCNH2 | 300 | F   | L   | NM_000238.4(KCNH2):c.1920C>G (p.Phe640Leu) | not provided                                              | Pathogenic(Last reviewed: Mar 3, 2017)                                    | criteria provided, single submitter                  | VCV000423753 | 7                | 150951473      | 423753      | 407059      | rs199472970  | Neutral    | 0.438    | 0.349        | 0.213    |
| KCNH2 | 300 | F   | L   | NM_000238.4(KCNH2):c.1920C>G (p.Phe640Leu) | not provided                                              | Pathogenic(Last reviewed: Mar 3, 2017)                                    | criteria provided, single submitter                  | VCV000423753 | 7                | 150951473      | 423753      | 407059      | rs199472970  | Neutral    | 0.438    | 0.349        | 0.213    |
| KCNH2 | 300 | F   | L   | NM_000238.4(KCNH2):c.1918T>C (p.Phe640Leu) | Long QT syndrome 2 not provided                           | Conflicting interpretations of pathogenicity(Last reviewed: Apr 25, 2018) | criteria provided, conflicting interpretations       | VCV000200751 | 7                | 150951475      | 200751      | 197243      | rs199473529  | Neutral    | 0.438    | 0.349        | 0.213    |
| KCNH2 | 300 | F   | L   | NM_000238.4(KCNH2):c.1918T>C (p.Phe640Leu) | Long QT syndrome 2 not provided                           | Conflicting interpretations of pathogenicity(Last reviewed: Apr 25, 2018) | criteria provided, conflicting                       | VCV000200751 | 7                | 150951475      | 200751      | 197243      | rs199473529  | Neutral    | 0.438    | 0.349        | 0.213    |

| gene  | pos | aa1 | aa2 | Name                                       | Condition(s)                                                    | Clinical significance (Last reviewed)                                     | Review status                                        | Accession    | GRCh38Chromosome | GRCh38Location | VariationID | AlleleID(s) | dbSNP ID     | prediction | prob.LOF | prob.Neutral | prob.GOF |
|-------|-----|-----|-----|--------------------------------------------|-----------------------------------------------------------------|---------------------------------------------------------------------------|------------------------------------------------------|--------------|------------------|----------------|-------------|-------------|--------------|------------|----------|--------------|----------|
|       |     |     |     |                                            |                                                                 | reviewed: Apr 25, 2018)                                                   | interpretations                                      |              |                  |                |             |             |              |            |          |              |          |
| KCNH2 | 300 | F   | L   | NM_000238.4(KCNH2):c.1918T>C (p.Phe640Leu) | Long QT syndrome 2 not provided                                 | Conflicting interpretations of pathogenicity(Last reviewed: Apr 25, 2018) | criteria provided, conflicting interpretations       | VCV000200751 | 7                | 150951475      | 200751      | 197243      | rs199473529  | Neutral    | 0.438    | 0.349        | 0.213    |
| KCNH2 | 300 | F   | V   | NM_000238.4(KCNH2):c.1918T>G (p.Phe640Val) | Congenital long QT syndrome                                     | not provided                                                              | no assertion provided                                | VCV000067334 | 7                | 150951475      | 67334       | 78230       | rs199473529  | Neutral    | 0.425    | 0.34         | 0.234    |
| KCNH2 | 301 | R   | L   | NM_000238.4(KCNH2):c.902G>T (p.Arg301Leu)  | Congenital long QT syndrome                                     | not provided                                                              | no assertion provided                                | VCV000067542 | 7                | 150958073      | 67542       | 78438       | rs199472883  | Neutral    | 0.383    | 0.35         | 0.268    |
| KCNH2 | 301 | S   | F   | NM_000238.4(KCNH2):c.1922C>T (p.Ser641Phe) | Congenital long QT syndrome Long QT syndrome                    | Pathogenic(Last reviewed: Apr 30, 2019)                                   | criteria provided, single submitter                  | VCV000067337 | 7                | 150951471      | 67337       | 78233       | rs199472971  | Neutral    | 0.353    | 0.357        | 0.29     |
| KCNH2 | 302 | I   | M   | NM_000238.4(KCNH2):c.1926C>G (p.Ile642Met) | Long QT syndrome 2                                              | not provided                                                              | no assertion provided                                | VCV000973054 | 7                | 150951467      | 973054      | 961283      | rs1801154313 | Neutral    | 0.399    | 0.425        | 0.176    |
| KCNH2 | 303 | A   | G   | NM_000238.4(KCNH2):c.908C>G (p.Ala303Gly)  | Long QT syndrome                                                | Uncertain significance(Last reviewed: Jul 14, 2019)                       | criteria provided, single submitter                  | VCV000957218 | 7                | 150958067      | 957218      | 945526      | rs1165306519 | Neutral    | 0.464    | 0.346        | 0.19     |
| KCNH2 | 304 | V   | F   | NM_000238.4(KCNH2):c.1930G>T (p.Val644Phe) | Congenital long QT syndrome Long QT syndrome                    | Uncertain significance(Last reviewed: Aug 20, 2020)                       | criteria provided, single submitter                  | VCV000067340 | 7                | 150951463      | 67340       | 78236       | rs199472972  | Neutral    | 0.434    | 0.394        | 0.172    |
| KCNH2 | 304 | V   | I   | NM_000238.4(KCNH2):c.1930G>A (p.Val644Ile) | Long QT syndrome                                                | Uncertain significance(Last reviewed: Feb 17, 2020)                       | criteria provided, single submitter                  | VCV001009718 | 7                | 150951463      | 1009718     | 992194      | rs199472972  | Neutral    | 0.471    | 0.346        | 0.183    |
| KCNH2 | 304 | V   | L   | NM_000238.4(KCNH2):c.1930G>C (p.Val644Leu) | Congenital long QT syndrome                                     | not provided                                                              | no assertion provided                                | VCV000067339 | 7                | 150951463      | 67339       | 78235       | rs199472972  | Neutral    | 0.456    | 0.363        | 0.181    |
| KCNH2 | 305 | M   | I   | NM_000238.4(KCNH2):c.1935G>A (p.Met645Ile) | Congenital long QT syndrome not provided                        | Uncertain significance(Last reviewed: Oct 11, 2018)                       | criteria provided, single submitter                  | VCV000067343 | 7                | 150951458      | 67343       | 78239       | rs199472973  | Neutral    | 0.429    | 0.411        | 0.161    |
| KCNH2 | 305 | M   | L   | NM_000238.4(KCNH2):c.1933A>T (p.Met645Leu) | Congenital long QT syndrome                                     | not provided                                                              | no assertion provided                                | VCV000067342 | 7                | 150951460      | 67342       | 78238       | rs199472974  | Neutral    | 0.44     | 0.396        | 0.164    |
| KCNH2 | 305 | M   | L   | NM_000238.4(KCNH2):c.1933A>T (p.Met645Leu) | Congenital long QT syndrome                                     | not provided                                                              | no assertion provided                                | VCV000067342 | 7                | 150951460      | 67342       | 78238       | rs199472974  | Neutral    | 0.44     | 0.396        | 0.164    |
| KCNH2 | 305 | M   | L   | NM_000238.4(KCNH2):c.1933A>C (p.Met645Leu) | Long QT syndrome 2                                              | Pathogenic(Last reviewed: Jul 11, 2019)                                   | criteria provided, single submitter                  | VCV000869431 | 7                | 150951460      | 869431      | 857647      | rs199472974  | Neutral    | 0.44     | 0.396        | 0.164    |
| KCNH2 | 305 | M   | L   | NM_000238.4(KCNH2):c.1933A>C (p.Met645Leu) | Long QT syndrome 2                                              | Pathogenic(Last reviewed: Jul 11, 2019)                                   | criteria provided, single submitter                  | VCV000869431 | 7                | 150951460      | 869431      | 857647      | rs199472974  | Neutral    | 0.44     | 0.396        | 0.164    |
| KCNH2 | 305 | M   | V   | NM_000238.4(KCNH2):c.1933A>G (p.Met645Val) | Congenital long QT syndrome not provided                        | Pathogenic(Last reviewed: Nov 22, 2013)                                   | criteria provided, single submitter                  | VCV000067341 | 7                | 150951460      | 67341       | 78237       | rs199472974  | Neutral    | 0.427    | 0.41         | 0.163    |
| KCNH2 | 306 | G   | R   | NM_000238.4(KCNH2):c.916G>C (p.Gly306Arg)  | Long QT syndrome Congenital long QT syndrome Long QT syndrome 2 | Likely pathogenic(Last reviewed: Nov 10, 2017)                            | criteria provided, single submitter                  | VCV000067543 | 7                | 150958059      | 67543       | 78439       | rs199472884  | GOF        | 0.517    | 0.168        | 0.315    |
| KCNH2 | 306 | G   | W   | NM_000238.4(KCNH2):c.916G>T (p.Gly306Trp)  | Long QT syndrome not provided Congenital long QT syndrome       | Likely pathogenic(Last reviewed: Dec 22, 2017)                            | criteria provided, multiple submitters, no conflicts | VCV000067544 | 7                | 150958059      | 67544       | 78440       | rs199472884  | Neutral    | 0.5      | 0.267        | 0.233    |
| KCNH2 | 308 | G   | D   | NM_000238.4(KCNH2):c.1943G>A (p.Gly648Asp) | not provided                                                    | Pathogenic(Last reviewed: Sep 9, 2011)                                    | criteria provided, single submitter                  | VCV000200753 | 7                | 150951450      | 200753      | 197242      | rs794728486  | Neutral    | 0.486    | 0.283        | 0.231    |

| gene  | pos | aa1 | aa2 | Name                                                  | Condition(s)                                                                                                 | Clinical significance (Last reviewed)                                     | Review status                                        | Accession    | GRCh38Chromosome | GRCh38Location        | VariationID | AlleleID(s) | dbSNP ID     | prediction | prob.LOF | prob.Neutral | prob.GOF |
|-------|-----|-----|-----|-------------------------------------------------------|--------------------------------------------------------------------------------------------------------------|---------------------------------------------------------------------------|------------------------------------------------------|--------------|------------------|-----------------------|-------------|-------------|--------------|------------|----------|--------------|----------|
| KCNH2 | 308 | G   | S   | NM_000238.4(KCNH2):c.1942G>A (p.Gly648Ser)            | Congenital long QT syndrome                                                                                  | not provided                                                              | no assertion provided                                | VCV000067344 | 7                | 150951451             | 67344       | 78240       | rs199472975  | Neutral    | 0.409    | 0.361        | 0.229    |
| KCNH2 | 308 | M   | R   | NM_000238.4(KCNH2):c.923T>G (p.Met308Arg)             | Long QT syndrome/Arrhythmia                                                                                  | Uncertain significance(Last reviewed: Nov 4, 2020)                        | criteria provided, multiple submitters, no conflicts | VCV000923222 | 7                | 150957496             | 923222      | 910793      | rs372559632  | Neutral    | 0.513    | 0.28         | 0.207    |
| KCNH2 | 309 | H   | Q   | NM_000238.4(KCNH2):c.927C>G (p.His309Gln)             | not provided                                                                                                 | Uncertain significance(Last reviewed: May 1, 2018)                        | criteria provided, single submitter                  | VCV000810210 | 7                | 150957492             | 810210      | 795989      | rs775056804  | Neutral    | 0.433    | 0.326        | 0.241    |
| KCNH2 | 309 | H   | Y   | NM_000238.4(KCNH2):c.925C>T (p.His309Tyr)             | Long QT syndrome                                                                                             | Uncertain significance(Last reviewed: Nov 13, 2017)                       | criteria provided, single submitter                  | VCV000526915 | 7                | 150957494             | 526915      | 522691      | rs1241849013 | Neutral    | 0.372    | 0.409        | 0.219    |
| KCNH2 | 309 | S   | F   | NM_000238.4(KCNH2):c.1946C>T (p.Ser649Phe)            | Long QT syndrome/Congenital long QT syndrome                                                                 | Uncertain significance(Last reviewed: May 31, 2019)                       | criteria provided, single submitter                  | VCV000067346 | 7                | 150951120             | 67346       | 78242       | rs199472976  | Neutral    | 0.354    | 0.454        | 0.191    |
| KCNH2 | 309 | S   | P   | NM_000238.4(KCNH2):c.1945T>C (p.Ser649Pro)            | Congenital long QT syndrome                                                                                  | not provided                                                              | no assertion provided                                | VCV000067345 | 7                | 150951448             | 67345       | 78241       | rs199473530  | Neutral    | 0.466    | 0.322        | 0.211    |
| KCNH2 | 310 | P   | L   | NM_000238.4(KCNH2):c.929C>T (p.Pro310Leu)             | Arrhythmia                                                                                                   | Uncertain significance(Last reviewed: Jan 25, 2021)                       | criteria provided, single submitter                  | VCV001332223 | 7                | 150957490             | 1332223     | 1322942     | NA           | Neutral    | 0.389    | 0.422        | 0.189    |
| KCNH2 | 310 | P   | T   | NM_000238.4(KCNH2):c.928C>A (p.Pro310Thr)             | Arrhythmia                                                                                                   | Uncertain significance(Last reviewed: Dec 10, 2018)                       | criteria provided, single submitter                  | VCV000925941 | 7                | 150957491             | 925941      | 910792      | rs1801415549 | Neutral    | 0.39     | 0.418        | 0.192    |
| KCNH2 | 311 | M   | R   | NM_000238.4(KCNH2):c.1952T>G (p.Met651Arg)            | Long QT syndrome 2                                                                                           | Likely pathogenic(Last reviewed: Feb 9, 2017)                             | criteria provided, single submitter                  | VCV000427945 | 7                | 150951114             | 427945      | 419275      | rs1554425569 | Neutral    | 0.513    | 0.28         | 0.206    |
| KCNH2 | 312 | R   | C   | NM_000238.4(KCNH2):c.934C>T (p.Arg312Cys)             | Arrhythmia/Long QT syndrome 2/Short QT syndrome 1/Long QT syndrome/Congenital long QT syndrome/not specified | Conflicting interpretations of pathogenicity(Last reviewed: Oct 14, 2020) | criteria provided, conflicting interpretations       | VCV000067547 | 7                | 150957485             | 67547       | 78443       | rs199472885  | Neutral    | 0.381    | 0.458        | 0.162    |
| KCNH2 | 312 | R   | H   | NM_000238.4(KCNH2):c.935G>A (p.Arg312His)             | Long QT syndrome/Arrhythmia/not provided                                                                     | Uncertain significance(Last reviewed: Aug 18, 2020)                       | criteria provided, multiple submitters, no conflicts | VCV000456942 | 7                | 150957484             | 456942      | 457557      | rs747313232  | Neutral    | 0.368    | 0.469        | 0.163    |
| KCNH2 | 312 | Y   | H   | NM_000238.4(KCNH2):c.1954_1956delinsCAC (p.Tyr652His) | not provided                                                                                                 | Uncertain significance(Last reviewed: Sep 24, 2021)                       | criteria provided, single submitter                  | VCV000200761 | 7                | 150951110 - 150951112 | 200761      | 197237      | rs794728490  | Neutral    | 0.411    | 0.442        | 0.148    |
| KCNH2 | 314 | G   | D   | NM_000238.4(KCNH2):c.941G>A (p.Gly314Asp)             | Arrhythmia                                                                                                   | Uncertain significance(Last reviewed: Sep 10, 2019)                       | criteria provided, single submitter                  | VCV000925690 | 7                | 150957478             | 925690      | 910789      | rs1801414464 | Neutral    | 0.586    | 0.195        | 0.219    |
| KCNH2 | 314 | G   | S   | NM_000238.4(KCNH2):c.940G>A (p.Gly314Ser)             | Congenital long QT syndrome                                                                                  | not provided                                                              | no assertion provided                                | VCV000067548 | 7                | 150957479             | 67548       | 78444       | rs199473504  | Neutral    | 0.53     | 0.276        | 0.194    |
| KCNH2 | 315 | I   | V   | NM_000238.4(KCNH2):c.1963A>G (p.Ile655Val)            | Long QT syndrome                                                                                             | Uncertain significance(Last reviewed: Dec 30, 2016)                       | criteria provided, single submitter                  | VCV000405359 | 7                | 150951103             | 405359      | 395694      | rs1060500673 | Neutral    | 0.486    | 0.384        | 0.13     |
| KCNH2 | 316 | F   | C   | NM_000238.4(KCNH2):c.1967T>G (p.Phe656Cys)            | Congenital long QT syndrome                                                                                  | not provided                                                              | no assertion provided                                | VCV000067347 | 7                | 150951099             | 67347       | 78243       | rs199472977  | Neutral    | 0.493    | 0.368        | 0.14     |
| KCNH2 | 317 | G   | C   | NM_000238.4(KCNH2):c.1969G>T                          | Congenital long QT syndrome                                                                                  | not provided                                                              | no assertion                                         | VCV000067350 | 7                | 150951097             | 67350       | 78246       | rs199472978  | Neutral    | 0.467    | 0.32         | 0.213    |

| gene  | pos | aa1 | aa2 | Name                                       | Condition(s)                                                                                          | Clinical significance (Last reviewed)                                     | Review status                                        | Accession    | GRCh38Chromosome | GRCh38Location | VariationID | AlleleID(s) | dbSNP ID     | prediction | prob.LOF | prob.Neutral | prob.GOF |
|-------|-----|-----|-----|--------------------------------------------|-------------------------------------------------------------------------------------------------------|---------------------------------------------------------------------------|------------------------------------------------------|--------------|------------------|----------------|-------------|-------------|--------------|------------|----------|--------------|----------|
|       |     |     |     | (p.Gly657Cys)                              |                                                                                                       |                                                                           |                                                      |              |                  |                |             |             |              |            |          |              |          |
| KCNH2 | 317 | G   | R   | NM_000238.4(KCNH2):c.1969G>C (p.Gly657Arg) | Congenital long QT syndrome                                                                           | not provided                                                              | no assertion provided                                | VCV000067349 | 7                | 150951097      | 67349       | 78245       | rs199472978  | GOF        | 0.513    | 0.163        | 0.324    |
| KCNH2 | 317 | G   | S   | NM_000238.4(KCNH2):c.1969G>A (p.Gly657Ser) | Congenital long QT syndrome Long QT syndrome                                                          | Pathogenic/Likely pathogenic(Last reviewed: Jun 7, 2021)                  | criteria provided, multiple submitters, no conflicts | VCV000067348 | 7                | 150951097      | 67348       | 78244       | rs199472978  | Neutral    | 0.498    | 0.267        | 0.235    |
| KCNH2 | 317 | G   | V   | NM_000238.4(KCNH2):c.1970G>T (p.Gly657Val) |                                                                                                       | not provided                                                              | Likely pathogenic(Last reviewed: Jun 26, 2015)       | VCV000427076 | 7                | 150951096      | 427076      | 415087      | rs1085307943 | Neutral    | 0.471    | 0.308        | 0.22     |
| KCNH2 | 317 | N   | S   | NM_000238.4(KCNH2):c.950A>G (p.Asn317Ser)  | Long QT syndrome 2 Short QT syndrome 1  Arrhythmia Long QT syndrome                                   | Uncertain significance(Last reviewed: Apr 30, 2019)                       | criteria provided, multiple submitters, no conflicts | VCV000405346 | 7                | 150957469      | 405346      | 395490      | rs779027664  | Neutral    | 0.461    | 0.312        | 0.227    |
| KCNH2 | 318 | N   | S   | NM_000238.4(KCNH2):c.1973A>G (p.Asn658Ser) | Long QT syndrome not provided                                                                         | Conflicting interpretations of pathogenicity(Last reviewed: Dec 20, 2016) | criteria provided, conflicting interpretations       | VCV000389141 | 7                | 150951093      | 389141      | 369597      | rs1057523338 | Neutral    | 0.522    | 0.288        | 0.19     |
| KCNH2 | 320 | S   | L   | NM_000238.4(KCNH2):c.959C>T (p.Ser320Leu)  | Congenital long QT syndrome                                                                           | not provided                                                              | no assertion provided                                | VCV000067550 | 7                | 150957460      | 67550       | 78446       | rs199472886  | Neutral    | 0.524    | 0.322        | 0.154    |
| KCNH2 | 320 | S   | L   | NM_000238.4(KCNH2):c.959C>T (p.Ser320Leu)  | Congenital long QT syndrome                                                                           | not provided                                                              | no assertion provided                                | VCV000067550 | 7                | 150957460      | 67550       | 78446       | rs199472886  | Neutral    | 0.524    | 0.322        | 0.154    |
| KCNH2 | 320 | S   | L   | NM_000238.4(KCNH2):c.1979C>T (p.Ser660Leu) | Long QT syndrome 2 Congenital long QT syndrome Cardiovascular phenotype Long QT syndrome not provided | Conflicting interpretations of pathogenicity(Last reviewed: Aug 30, 2020) | criteria provided, conflicting interpretations       | VCV000067352 | 7                | 150951087      | 67352       | 78248       | rs199472979  | Neutral    | 0.524    | 0.322        | 0.154    |
| KCNH2 | 320 | S   | L   | NM_000238.4(KCNH2):c.1979C>T (p.Ser660Leu) | Long QT syndrome 2 Congenital long QT syndrome Cardiovascular phenotype Long QT syndrome not provided | Conflicting interpretations of pathogenicity(Last reviewed: Aug 30, 2020) | criteria provided, conflicting interpretations       | VCV000067352 | 7                | 150951087      | 67352       | 78248       | rs199472979  | Neutral    | 0.524    | 0.322        | 0.154    |
| KCNH2 | 320 | S   | W   | NM_000238.4(KCNH2):c.959C>G (p.Ser320Trp)  | Arrhythmia not provided                                                                               | Uncertain significance(Last reviewed: Feb 8, 2021)                        | criteria provided, multiple submitters, no conflicts | VCV000200312 | 7                | 150957460      | 200312      | 197304      | rs199472886  | Neutral    | 0.532    | 0.288        | 0.18     |
| KCNH2 | 321 | A   | V   | NM_000238.4(KCNH2):c.1982C>T (p.Ala661Val) | Sudden cardiac arrest                                                                                 | Uncertain significance(Last reviewed: Apr 7, 2020)                        | no assertion criteria provided                       | VCV000977179 | 7                | 150951084      | 977179      | 965303      | rs768519164  | Neutral    | 0.479    | 0.365        | 0.156    |
| KCNH2 | 321 | D   | Y   | NM_000238.4(KCNH2):c.961G>T (p.Asp321Tyr)  | Long QT syndrome 2 not provided                                                                       | Uncertain significance(Last reviewed: Mar 4, 2019)                        | criteria provided, multiple submitters, no conflicts | VCV000359312 | 7                | 150957458      | 359312      | 305394      | rs886062089  | Neutral    | 0.475    | 0.295        | 0.229    |
| KCNH2 | 322 | I   | T   | NM_000238.4(KCNH2):c.1985T>C (p.Ile662Thr) | Congenital long QT syndrome                                                                           | not provided                                                              | no assertion provided                                | VCV000067353 | 7                | 150951081      | 67353       | 78249       | rs199472980  | Neutral    | 0.559    | 0.308        | 0.133    |
| KCNH2 | 323 | D   | N   | NM_000238.4(KCNH2):c.967G>A (p.Asp323Asn)  | Long QT syndrome Congenital long QT syndrome                                                          | Uncertain significance(Last reviewed: Aug 20, 2020)                       | criteria provided, single submitter                  | VCV000067551 | 7                | 150957452      | 67551       | 78447       | rs199472887  | Neutral    | 0.565    | 0.232        | 0.204    |
| KCNH2 | 325 | V   | L   | NM_000238.4(KCNH2):c.973G>C (p.Val325Leu)  | Long QT syndrome                                                                                      | Uncertain significance(Last reviewed: Jan 28, 2020)                       | criteria provided, single submitter                  | VCV000856033 | 7                | 150957446      | 856033      | 833348      | rs149381387  | Neutral    | 0.509    | 0.381        | 0.11     |

| gene  | pos | aa1 | aa2 | Name                                       | Condition(s)                                                                                       | Clinical significance (Last reviewed)                                     | Review status                                        | Accession    | GRCh38Chromosome | GRCh38Location | VariationID | AlleleID(s) | dbSNP ID     | prediction | prob.LOF | prob.Neutral | prob.GOF |
|-------|-----|-----|-----|--------------------------------------------|----------------------------------------------------------------------------------------------------|---------------------------------------------------------------------------|------------------------------------------------------|--------------|------------------|----------------|-------------|-------------|--------------|------------|----------|--------------|----------|
| KCNH2 | 325 | V   | M   | NM_000238.4(KCNH2):c.973G>A (p.Val325Met)  | Long QT syndrome                                                                                   | Uncertain significance(Last reviewed: Oct 8, 2017)                        | criteria provided, single submitter                  | VCV000526931 | 7                | 150957446      | 526931      | 522688      | rs149381387  | Neutral    | 0.485    | 0.415        | 0.1      |
| KCNH2 | 326 | R   | C   | NM_000238.4(KCNH2):c.976C>T (p.Arg326Cys)  | Long QT syndrome                                                                                   | Uncertain significance(Last reviewed: Aug 29, 2020)                       | criteria provided, single submitter                  | VCV001040723 | 7                | 150957443      | 1040723     | 1027895     | rs759079349  | Neutral    | 0.428    | 0.428        | 0.144    |
| KCNH2 | 326 | R   | H   | NM_000238.4(KCNH2):c.977G>A (p.Arg326His)  | Long QT syndrome                                                                                   | Uncertain significance(Last reviewed: Aug 10, 2018)                       | criteria provided, single submitter                  | VCV000649300 | 7                | 150957442      | 649300      | 635918      | rs1187921286 | Neutral    | 0.436    | 0.43         | 0.134    |
| KCNH2 | 327 | Y   | C   | NM_000238.4(KCNH2):c.980A>G (p.Tyr327Cys)  | Cardiovascular phenotype                                                                           | Uncertain significance(Last reviewed: May 8, 2015)                        | criteria provided, single submitter                  | VCV000264025 | 7                | 150957439      | 264025      | 258467      | rs886039013  | Neutral    | 0.482    | 0.395        | 0.123    |
| KCNH2 | 327 | Y   | H   | NM_000238.4(KCNH2):c.979T>C (p.Tyr327His)  | Arrhythmia                                                                                         | Uncertain significance(Last reviewed: Jul 15, 2021)                       | criteria provided, single submitter                  | VCV000629260 | 7                | 150957440      | 629260      | 617352      | rs776431167  | Neutral    | 0.514    | 0.371        | 0.115    |
| KCNH2 | 328 | R   | C   | NM_000238.4(KCNH2):c.982C>T (p.Arg328Cys)  | Long QT syndrome Arrhythmia Cardiovascular phenotype not specified not provided Long QT syndrome 2 | Conflicting interpretations of pathogenicity(Last reviewed: Nov 21, 2020) | criteria provided, conflicting interpretations       | VCV000067552 | 7                | 150957437      | 67552       | 78448       | rs199473505  | Neutral    | 0.466    | 0.401        | 0.134    |
| KCNH2 | 328 | R   | H   | NM_000238.4(KCNH2):c.983G>A (p.Arg328His)  | Arrhythmia Long QT syndrome not provided                                                           | Uncertain significance(Last reviewed: Jul 21, 2020)                       | criteria provided, multiple submitters, no conflicts | VCV000200315 | 7                | 150957436      | 200315      | 197303      | rs747437736  | Neutral    | 0.495    | 0.383        | 0.122    |
| KCNH2 | 329 | G   | A   | NM_000238.4(KCNH2):c.2006G>C (p.Gly669Ala) | Long QT syndrome                                                                                   | Uncertain significance(Last reviewed: Nov 7, 2018)                        | criteria provided, single submitter                  | VCV000647535 | 7                | 150951060      | 647535      | 635901      | rs1584852286 | Neutral    | 0.576    | 0.302        | 0.123    |
| KCNH2 | 329 | T   | A   | NM_000238.4(KCNH2):c.985A>G (p.Thr329Ala)  | Long QT syndrome                                                                                   | Uncertain significance(Last reviewed: Jul 6, 2018)                        | criteria provided, single submitter                  | VCV000640482 | 7                | 150957434      | 640482      | 635917      | rs946110595  | Neutral    | 0.507    | 0.401        | 0.091    |
| KCNH2 | 331 | A   | G   | NM_000238.4(KCNH2):c.2012C>G (p.Ala671Gly) | Long QT syndrome                                                                                   | Uncertain significance(Last reviewed: Aug 2, 2020)                        | criteria provided, single submitter                  | VCV001024776 | 7                | 150951054      | 1024776     | 1007345     | rs779970711  | Neutral    | 0.636    | 0.245        | 0.119    |
| KCNH2 | 332 | K   | R   | NM_000238.4(KCNH2):c.995A>G (p.Lys332Arg)  | Long QT syndrome                                                                                   | Uncertain significance(Last reviewed: Nov 26, 2019)                       | criteria provided, single submitter                  | VCV000847270 | 7                | 150957424      | 847270      | 833347      | rs1801410888 | Neutral    | 0.529    | 0.211        | 0.26     |
| KCNH2 | 332 | R   | C   | NM_000238.4(KCNH2):c.2014C>T (p.Arg672Cys) | Long QT syndrome                                                                                   | Uncertain significance(Last reviewed: Apr 21, 2020)                       | criteria provided, single submitter                  | VCV001020103 | 7                | 150951052      | 1020103     | 1007344     | rs769197005  | Neutral    | 0.466    | 0.342        | 0.192    |
| KCNH2 | 334 | P   | L   | NM_000238.4(KCNH2):c.1001C>T (p.Pro334Leu) | Congenital long QT syndrome not provided Long QT syndrome                                          | Conflicting interpretations of pathogenicity(Last reviewed: Jan 29, 2019) | criteria provided, conflicting interpretations       | VCV000067161 | 7                | 150957418      | 67161       | 78057       | rs199472888  | Neutral    | 0.603    | 0.274        | 0.123    |
| KCNH2 | 337 | M   | T   | NM_000238.4(KCNH2):c.2030T>C (p.Met677Thr) | Long QT syndrome                                                                                   | Uncertain significance(Last reviewed: May 27, 2019)                       | criteria provided, single submitter                  | VCV000939911 | 7                | 150951036      | 939911      | 933769      | rs756870695  | Neutral    | 0.575    | 0.318        | 0.107    |
| KCNH2 | 337 | T   | A   | NM_000238.4(KCNH2):c.1009A>G (p.Thr337Ala) | Arrhythmia                                                                                         | Uncertain significance(Last reviewed: Feb 6, 2020)                        | criteria provided, single submitter                  | VCV000927557 | 7                | 150957410      | 927557      | 910786      | rs1584863947 | Neutral    | 0.528    | 0.379        | 0.093    |

| gene  | pos | aa1 | aa2 | Name                                       | Condition(s)                                                                                       | Clinical significance (Last reviewed)                                     | Review status                                        | Accession    | GRCh38Chromosome | GRCh38Location | VariationID | AlleleID(s) | dbSNP ID     | prediction | prob.LOF | prob.Neutral | prob.GOF |
|-------|-----|-----|-----|--------------------------------------------|----------------------------------------------------------------------------------------------------|---------------------------------------------------------------------------|------------------------------------------------------|--------------|------------------|----------------|-------------|-------------|--------------|------------|----------|--------------|----------|
| KCNH2 | 337 | T   | S   | NM_000238.4(KCNH2):c.1010C>G (p.Thr337Ser) | Long QT syndrome                                                                                   | Uncertain significance(Last reviewed: Sep 20, 2020)                       | criteria provided, single submitter                  | VCV001043131 | 7                | 150957409      | 1043131     | 1027894     | rs41311018   | Neutral    | 0.563    | 0.338        | 0.099    |
| KCNH2 | 338 | L   | P   | NM_000238.4(KCNH2):c.2033T>C (p.Leu678Pro) | Congenital long QT syndrome Long QT syndrome                                                       | Uncertain significance(Last reviewed: Apr 30, 2016)                       | criteria provided, single submitter                  | VCV000067356 | 7                | 150951033      | 67356       | 78252       | rs199472981  | Neutral    | 0.725    | 0.174        | 0.1      |
| KCNH2 | 338 | L   | R   | NM_000238.4(KCNH2):c.2033T>G (p.Leu678Arg) | not provided                                                                                       | Uncertain significance(Last reviewed: Oct 5, 2021)                        | criteria provided, single submitter                  | VCV001330843 | 7                | 150951033      | 1330843     | 1321520     | NA           | LOF        | 0.724    | 0.145        | 0.131    |
| KCNH2 | 339 | N   | K   | NM_000238.4(KCNH2):c.1017C>G (p.Asn339Lys) | Long QT syndrome                                                                                   | Uncertain significance(Last reviewed: Jun 7, 2019)                        | criteria provided, single submitter                  | VCV000942831 | 7                | 150957402      | 942831      | 933777      | rs1801410026 | Neutral    | 0.622    | 0.203        | 0.174    |
| KCNH2 | 339 | R   | Q   | NM_000238.4(KCNH2):c.2036G>A (p.Arg679Gln) | Arrhythmia                                                                                         | Uncertain significance(Last reviewed: Jan 1, 2020)                        | criteria provided, single submitter                  | VCV000922598 | 7                | 150951030      | 922598      | 910747      | rs567628192  | Neutral    | 0.587    | 0.289        | 0.124    |
| KCNH2 | 340 | F   | L   | NM_000238.4(KCNH2):c.1018T>C (p.Phe340Leu) | Arrhythmia                                                                                         | Uncertain significance(Last reviewed: Jun 14, 2021)                       | criteria provided, single submitter                  | VCV001332429 | 7                | 150957401      | 1332429     | 1323147     | NA           | Neutral    | 0.615    | 0.268        | 0.116    |
| KCNH2 | 341 | R   | Q   | NM_000238.4(KCNH2):c.2042G>A (p.Arg681Gln) | Long QT syndrome                                                                                   | Uncertain significance(Last reviewed: Jul 15, 2019)                       | criteria provided, single submitter                  | VCV000957302 | 7                | 150951024      | 957302      | 945522      | rs1801131066 | Neutral    | 0.571    | 0.305        | 0.124    |
| KCNH2 | 342 | D   | V   | NM_000238.4(KCNH2):c.1025A>T (p.Asp342Val) | Acquired long QT syndrome                                                                          | not provided                                                              | no assertion provided                                | VCV000067162 | 7                | 150957394      | 67162       | 78058       | rs199472889  | Neutral    | 0.513    | 0.326        | 0.161    |
| KCNH2 | 342 | E   | D   | NM_000238.4(KCNH2):c.2046G>C (p.Glu682Asp) | Wolff-Parkinson-White pattern Arrhythmic not provided                                              | Uncertain significance(Last reviewed: Nov 25, 2020)                       | criteria provided, multiple submitters, no conflicts | VCV000487626 | 7                | 150951020      | 487626      | 480695      | rs1338579153 | Neutral    | 0.62     | 0.185        | 0.194    |
| KCNH2 | 345 | R   | C   | NM_000238.4(KCNH2):c.2053C>T (p.Arg685Cys) | Long QT syndrome 2 not provided Long QT syndrome                                                   | Conflicting interpretations of pathogenicity(Last reviewed: Nov 25, 2019) | criteria provided, conflicting interpretations       | VCV000448974 | 7                | 150951013      | 448974      | 442551      | rs778135438  | Neutral    | 0.417    | 0.396        | 0.187    |
| KCNH2 | 345 | R   | H   | NM_000238.4(KCNH2):c.2054G>A (p.Arg685His) | Long QT syndrome 2                                                                                 | Uncertain significance                                                    | criteria provided, single submitter                  | VCV000979129 | 7                | 150951012      | 979129      | 967185      | rs758751607  | Neutral    | 0.432    | 0.371        | 0.196    |
| KCNH2 | 346 | D   | N   | NM_000238.4(KCNH2):c.1036G>A (p.Asp346Asn) | Long QT syndrome                                                                                   | Uncertain significance(Last reviewed: Nov 22, 2019)                       | criteria provided, single submitter                  | VCV000841013 | 7                | 150957383      | 841013      | 833346      | rs1420621400 | Neutral    | 0.569    | 0.215        | 0.216    |
| KCNH2 | 347 | H   | Y   | NM_000238.4(KCNH2):c.2059C>T (p.His687Tyr) | Congenital long QT syndrome                                                                        | not provided                                                              | no assertion provided                                | VCV000067357 | 7                | 150951007      | 67357       | 78253       | rs199472982  | Neutral    | 0.42     | 0.415        | 0.165    |
| KCNH2 | 347 | P   | S   | NM_000238.4(KCNH2):c.1039C>T (p.Pro347Ser) | Cardiovascular phenotype not specified Long QT syndrome 2 Arrhythmic not provided Long QT syndrome | Conflicting interpretations of pathogenicity(Last reviewed: Dec 7, 2020)  | criteria provided, conflicting interpretations       | VCV000067163 | 7                | 150957380      | 67163       | 78059       | rs138776684  | Neutral    | 0.45     | 0.398        | 0.152    |
| KCNH2 | 348 | F   | Y   | NM_000238.4(KCNH2):c.1043T>A (p.Phe348Tyr) | Long QT syndrome not provided                                                                      | Uncertain significance(Last reviewed: Sep 4, 2020)                        | criteria provided, multiple submitters, no conflicts | VCV000200319 | 7                | 150957376      | 200319      | 197301      | rs794728363  | Neutral    | 0.729    | 0.15         | 0.122    |
| KCNH2 | 351 | S   | L   | NM_000238.4(KCNH2):c.1052C>T (p.Ser351Leu) | Long QT syndrome Long QT syndrome 2                                                                | Conflicting interpretations of                                            | criteria provided,                                   | VCV000864050 | 7                | 150957367      | 864050      | 833345      | rs759134380  | Neutral    | 0.472    | 0.364        | 0.165    |



| gene  | pos | aa1 | aa2 | Name                                       | Condition(s)                                                                      | Clinical significance (Last reviewed)                                     | Review status                                        | Accession    | GRCh38Chromosome | GRCh38Location | VariationID | AlleleID(s) | dbSNP ID     | prediction | prob.LOF | prob.Neutral | prob.GOF |
|-------|-----|-----|-----|--------------------------------------------|-----------------------------------------------------------------------------------|---------------------------------------------------------------------------|------------------------------------------------------|--------------|------------------|----------------|-------------|-------------|--------------|------------|----------|--------------|----------|
|       |     |     |     |                                            |                                                                                   | pathogenicity(Last reviewed: Dec 30, 2019)                                | conflicting interpretations                          |              |                  |                |             |             |              |            |          |              |          |
| KCNH2 | 352 | P   | R   | NM_000238.4(KCNH2):c.1055C>G (p.Pro352Arg) | Long QT syndrome                                                                  | Uncertain significance(Last reviewed: Apr 19, 2018)                       | criteria provided, single submitter                  | VCV001038936 | 7                | 150957364      | 1038936     | 1027893     | rs1801408390 | Neutral    | 0.517    | 0.202        | 0.281    |
| KCNH2 | 352 | P   | S   | NM_000238.4(KCNH2):c.1054C>T (p.Pro352Ser) | Arrhythmia                                                                        | Uncertain significance(Last reviewed: Nov 16, 2018)                       | criteria provided, single submitter                  | VCV000918184 | 7                | 150957365      | 918184      | 910784      | rs1801408471 | Neutral    | 0.493    | 0.303        | 0.204    |
| KCNH2 | 353 | L   | P   | NM_000238.4(KCNH2):c.2078T>C (p.Leu693Pro) | Congenital long QT syndrome Inborn genetic diseases Long QT syndrome not provided | Conflicting interpretations of pathogenicity(Last reviewed: Oct 6, 2017)  | criteria provided, conflicting interpretations       | VCV000067359 | 7                | 150950988      | 67359       | 78255       | rs199472983  | Neutral    | 0.582    | 0.26         | 0.158    |
| KCNH2 | 353 | T   | I   | NM_000238.4(KCNH2):c.1058C>T (p.Thr353Ile) | Long QT syndrome                                                                  | Uncertain significance(Last reviewed: Jan 28, 2020)                       | criteria provided, single submitter                  | VCV001047609 | 7                | 150957361      | 1047609     | 1027892     | rs1801408187 | Neutral    | 0.381    | 0.47         | 0.148    |
| KCNH2 | 354 | R   | C   | NM_000238.4(KCNH2):c.2080C>T (p.Arg694Cys) | Long QT syndrome Arrhythmia                                                       | Uncertain significance(Last reviewed: Jun 9, 2019)                        | criteria provided, multiple submitters, no conflicts | VCV000651990 | 7                | 150950986      | 651990      | 635900      | rs765717858  | Neutral    | 0.436    | 0.405        | 0.158    |
| KCNH2 | 354 | R   | H   | NM_000238.4(KCNH2):c.2081G>A (p.Arg694His) | not provided Long QT syndrome                                                     | Conflicting interpretations of pathogenicity(Last reviewed: Mar 14, 2020) | criteria provided, conflicting interpretations       | VCV000200410 | 7                | 150950985      | 200410      | 197232      | rs794728383  | Neutral    | 0.462    | 0.379        | 0.16     |
| KCNH2 | 356 | R   | C   | NM_000238.4(KCNH2):c.1066C>T (p.Arg356Cys) | Arrhythmia                                                                        | Uncertain significance(Last reviewed: Dec 3, 2020)                        | criteria provided, single submitter                  | VCV000925269 | 7                | 150957353      | 925269      | 910783      | rs772689518  | Neutral    | 0.587    | 0.245        | 0.168    |
| KCNH2 | 356 | R   | C   | NM_000238.4(KCNH2):c.1066C>T (p.Arg356Cys) | Arrhythmia                                                                        | Uncertain significance(Last reviewed: Dec 3, 2020)                        | criteria provided, single submitter                  | VCV000925269 | 7                | 150957353      | 925269      | 910783      | rs772689518  | Neutral    | 0.587    | 0.245        | 0.168    |
| KCNH2 | 356 | R   | C   | NM_000238.4(KCNH2):c.2086C>T (p.Arg696Cys) | Congenital long QT syndrome Long QT syndrome                                      | Uncertain significance(Last reviewed: Nov 28, 2018)                       | criteria provided, single submitter                  | VCV000067360 | 7                | 150950980      | 67360       | 78256       | rs199472984  | Neutral    | 0.587    | 0.245        | 0.168    |
| KCNH2 | 356 | R   | C   | NM_000238.4(KCNH2):c.2086C>T (p.Arg696Cys) | Congenital long QT syndrome Long QT syndrome                                      | Uncertain significance(Last reviewed: Nov 28, 2018)                       | criteria provided, single submitter                  | VCV000067360 | 7                | 150950980      | 67360       | 78256       | rs199472984  | Neutral    | 0.587    | 0.245        | 0.168    |
| KCNH2 | 356 | R   | H   | NM_000238.4(KCNH2):c.1067G>A (p.Arg356His) | Cardiovascular phenotype Arrhythmia not provided Long QT syndrome                 | Uncertain significance(Last reviewed: Mar 22, 2021)                       | criteria provided, multiple submitters, no conflicts | VCV000180382 | 7                | 150957352      | 180382      | 178575      | rs730880118  | Neutral    | 0.641    | 0.199        | 0.161    |
| KCNH2 | 356 | R   | P   | NM_000238.4(KCNH2):c.2087G>C (p.Arg696Pro) | Congenital long QT syndrome                                                       | not provided                                                              | no assertion provided                                | VCV000067361 | 7                | 150950979      | 67361       | 78257       | rs199473531  | Neutral    | 0.653    | 0.185        | 0.162    |
| KCNH2 | 357 | E   | D   | NM_000238.4(KCNH2):c.1071G>T (p.Glu357Asp) | Arrhythmia                                                                        | Uncertain significance(Last reviewed: Aug 8, 2019)                        | criteria provided, single submitter                  | VCV000628850 | 7                | 150957348      | 628850      | 617350      | rs762016259  | LOF        | 0.674    | 0.14         | 0.186    |
| KCNH2 | 358 | E   | D   | NM_000238.4(KCNH2):c.2094G>T (p.Glu698Asp) | Long QT syndrome                                                                  | Uncertain significance(Last reviewed: Aug 27, 2020)                       | criteria provided, single submitter                  | VCV001001384 | 7                | 150950972      | 1001384     | 992193      | rs1801127916 | LOF        | 0.76     | 0.122        | 0.118    |

| gene  | pos | aa1 | aa2 | Name                                       | Condition(s)                                                             | Clinical significance (Last reviewed)                                    | Review status                                        | Accession    | GRCh38Chromosome | GRCh38Location | VariationID | AlleleID(s) | dbSNP ID     | prediction | prob.LOF | prob.Neutral | prob.GOF |
|-------|-----|-----|-----|--------------------------------------------|--------------------------------------------------------------------------|--------------------------------------------------------------------------|------------------------------------------------------|--------------|------------------|----------------|-------------|-------------|--------------|------------|----------|--------------|----------|
| KCNH2 | 358 | I   | N   | NM_000238.4(KCNH2):c.1073T>A (p.Ile358Asn) | Arrhythmia                                                               | Uncertain significance(Last reviewed: Jun 8, 2020)                       | criteria provided, single submitter                  | VCV001172314 | 7                | 150957346      | 1172314     | 1160702     | NA           | LOF        | 0.803    | 0.109        | 0.088    |
| KCNH2 | 359 | E   | D   | NM_000238.4(KCNH2):c.2097G>T (p.Glu699Asp) | Long QT syndrome                                                         | Uncertain significance(Last reviewed: Oct 24, 2020)                      | criteria provided, single submitter                  | VCV001001725 | 7                | 150950969      | 1001725     | 992192      | rs550680502  | LOF        | 0.759    | 0.107        | 0.135    |
| KCNH2 | 359 | I   | K   | NM_000238.4(KCNH2):c.1076T>A (p.Ile359Lys) | Long QT syndrome                                                         | Uncertain significance(Last reviewed: Jun 19, 2017)                      | criteria provided, single submitter                  | VCV000456877 | 7                | 150957343      | 456877      | 456861      | rs1554427331 | LOF        | 0.807    | 0.079        | 0.114    |
| KCNH2 | 361 | P   | S   | NM_000238.4(KCNH2):c.1081C>T (p.Pro361Ser) | Long QT syndrome                                                         | Uncertain significance(Last reviewed: May 18, 2017)                      | criteria provided, single submitter                  | VCV000456878 | 7                | 150957338      | 456878      | 457555      | rs1293901043 | Neutral    | 0.661    | 0.213        | 0.127    |
| KCNH2 | 366 | R   | Q   | NM_000238.4(KCNH2):c.1097G>A (p.Arg366Gln) | not provided Arrhythmia                                                  | Uncertain significance(Last reviewed: Jun 18, 2021)                      | criteria provided, multiple submitters, no conflicts | VCV000918732 | 7                | 150957322      | 918732      | 910782      | rs1372751640 | LOF        | 0.718    | 0.139        | 0.142    |
| KCNH2 | 366 | S   | C   | NM_000238.4(KCNH2):c.2117C>G (p.Ser706Cys) | Congenital long QT syndrome                                              | not provided                                                             | no assertion provided                                | VCV000067364 | 7                | 150950949      | 67364       | 78260       | rs199472985  | Neutral    | 0.634    | 0.242        | 0.123    |
| KCNH2 | 366 | S   | F   | NM_000238.4(KCNH2):c.2117C>T (p.Ser706Phe) | Acquired long QT syndrome                                                | not provided                                                             | no assertion provided                                | VCV000067365 | 7                | 150950949      | 67365       | 78261       | rs199472985  | Neutral    | 0.633    | 0.224        | 0.143    |
| KCNH2 | 367 | T   | A   | NM_000238.4(KCNH2):c.1099A>G (p.Thr367Ala) | Long QT syndrome                                                         | Uncertain significance(Last reviewed: Oct 9, 2020)                       | criteria provided, single submitter                  | VCV001047434 | 7                | 150957320      | 1047434     | 1027891     | rs199472890  | LOF        | 0.78     | 0.132        | 0.088    |
| KCNH2 | 367 | T   | S   | NM_000238.4(KCNH2):c.1099A>T (p.Thr367Ser) | not provided Arrhythmia                                                  | Uncertain significance(Last reviewed: Aug 18, 2020)                      | criteria provided, single submitter                  | VCV000067164 | 7                | 150957320      | 67164       | 78060       | rs199472890  | LOF        | 0.788    | 0.118        | 0.094    |
| KCNH2 | 368 | T   | A   | NM_000238.4(KCNH2):c.2122A>G (p.Thr708Ala) | Long QT syndrome                                                         | Uncertain significance(Last reviewed: Aug 24, 2017)                      | criteria provided, single submitter                  | VCV000527003 | 7                | 150950944      | 527003      | 522687      | rs1554425463 | Neutral    | 0.723    | 0.165        | 0.113    |
| KCNH2 | 371 | I   | V   | NM_000238.4(KCNH2):c.2131A>G (p.Ile711Val) | Long QT syndrome not provided Arrhythmial<br>Congenital long QT syndrome | Conflicting interpretations of pathogenicity(Last reviewed: Jun 7, 2021) | criteria provided, conflicting interpretations       | VCV000067367 | 7                | 150950935      | 67367       | 78263       | rs199473532  | LOF        | 0.81     | 0.105        | 0.085    |
| KCNH2 | 375 | A   | V   | NM_000238.4(KCNH2):c.2144C>T (p.Ala715Val) | Arrhythmia not specified Long QT syndrome <br>Cardiovascular phenotype   | Uncertain significance(Last reviewed: Jul 22, 2020)                      | criteria provided, multiple submitters, no conflicts | VCV000200413 | 7                | 150950922      | 200413      | 197228      | rs780656919  | LOF        | 0.841    | 0.081        | 0.077    |
| KCNH2 | 376 | Q   | E   | NM_000238.4(KCNH2):c.1126C>G (p.Gln376Glu) | Long QT syndrome 2                                                       | Uncertain significance(Last reviewed: Jan 13, 2018)                      | criteria provided, single submitter                  | VCV000909783 | 7                | 150957293      | 909783      | 897674      | rs1801405757 | LOF        | 0.824    | 0.078        | 0.097    |
| KCNH2 | 381 | P   | L   | NM_000238.4(KCNH2):c.2162C>T (p.Pro721Leu) | Long QT syndrome Congenital long QT<br>syndrome                          | Likely pathogenic(Last reviewed: Feb 6, 2019)                            | criteria provided, multiple submitters, no conflicts | VCV000067371 | 7                | 150950404      | 67371       | 78267       | rs199472986  | LOF        | 0.737    | 0.148        | 0.115    |
| KCNH2 | 383 | C   | G   | NM_000238.4(KCNH2):c.2167T>G (p.Cys723Gly) | Arrhythmia                                                               | Uncertain significance(Last reviewed: Mar 4, 2020)                       | criteria provided, single submitter                  | VCV000922895 | 7                | 150950399      | 922895      | 910745      | rs199472987  | LOF        | 0.794    | 0.081        | 0.125    |
| KCNH2 | 383 | C   | R   | NM_000238.4(KCNH2):c.2167T>C               | not provided                                                             | not provided                                                             | no assertion                                         | VCV000067372 | 7                | 150950399      | 67372       | 78268       | rs199472987  | LOF        | 0.775    | 0.06         | 0.165    |

| gene  | pos | aa1 | aa2 | Name                                       | Condition(s)                                              | Clinical significance (Last reviewed)               | Review status                                        | Accession    | GRCh38Chromosome | GRCh38Location | VariationID | AlleleID(s) | dbSNP ID     | prediction | prob.LOF | prob.Neutral | prob.GOF |
|-------|-----|-----|-----|--------------------------------------------|-----------------------------------------------------------|-----------------------------------------------------|------------------------------------------------------|--------------|------------------|----------------|-------------|-------------|--------------|------------|----------|--------------|----------|
|       |     |     |     | (p.Cys723Arg)                              |                                                           |                                                     | provided                                             |              |                  |                |             |             |              |            |          |              |          |
| KCNH2 | 383 | C   | Y   | NM_000238.4(KCNH2):c.2168G>A (p.Cys723Tyr) | not provided                                              | Uncertain significance(Last reviewed: Mar 3, 2016)  | criteria provided, single submitter                  | VCV000200763 | 7                | 150950398      | 200763      | 197226      | rs794728491  | LOF        | 0.758    | 0.081        | 0.161    |
| KCNH2 | 384 | L   | P   | NM_000238.4(KCNH2):c.2171T>C (p.Leu724Pro) | Long QT syndrome not provided                             | Uncertain significance(Last reviewed: Sep 19, 2019) | criteria provided, multiple submitters, no conflicts | VCV000527007 | 7                | 150950395      | 527007      | 523130      | rs1554425307 | LOF        | 0.807    | 0.111        | 0.082    |
| KCNH2 | 388 | I   | F   | NM_000238.4(KCNH2):c.2182A>T (p.Ile728Phe) | Congenital long QT syndrome                               | not provided                                        | no assertion provided                                | VCV000067373 | 7                | 150950384      | 67373       | 78269       | rs199473533  | LOF        | 0.831    | 0.096        | 0.074    |
| KCNH2 | 391 | H   | P   | NM_000238.4(KCNH2):c.2192A>C (p.His731Pro) | not provided                                              | Likely pathogenic(Last reviewed: Jan 31, 2014)      | criteria provided, single submitter                  | VCV000200417 | 7                | 150950374      | 200417      | 197225      | rs794728385  | LOF        | 0.729    | 0.115        | 0.156    |
| KCNH2 | 393 | P   | L   | NM_000238.4(KCNH2):c.1178C>T (p.Pro393Leu) | Long QT syndrome                                          | Uncertain significance(Last reviewed: May 19, 2019) | criteria provided, single submitter                  | VCV000933401 | 7                | 150952804      | 933401      | 933776      | rs769814960  | LOF        | 0.721    | 0.149        | 0.129    |
| KCNH2 | 394 | R   | C   | NM_000238.4(KCNH2):c.2200C>T (p.Arg734Cys) | Arrhythmia not provided Long QT syndrome                  | Uncertain significance(Last reviewed: May 21, 2021) | criteria provided, multiple submitters, no conflicts | VCV000200765 | 7                | 150950366      | 200765      | 197224      | rs143072395  | Neutral    | 0.685    | 0.168        | 0.148    |
| KCNH2 | 394 | R   | G   | NM_000238.4(KCNH2):c.2200C>G (p.Arg734Gly) | Arrhythmia                                                | Uncertain significance(Last reviewed: Apr 15, 2021) | criteria provided, single submitter                  | VCV001332169 | 7                | 150950366      | 1332169     | 1322888     | NA           | LOF        | 0.746    | 0.111        | 0.144    |
| KCNH2 | 395 | S   | A   | NM_000238.4(KCNH2):c.2203T>G (p.Ser735Ala) | Arrhythmia                                                | Uncertain significance(Last reviewed: Aug 5, 2021)  | criteria provided, single submitter                  | VCV001332619 | 7                | 150950363      | 1332619     | 1323337     | NA           | LOF        | 0.755    | 0.145        | 0.1      |
| KCNH2 | 395 | S   | L   | NM_000238.4(KCNH2):c.2204C>T (p.Ser735Leu) | Long QT syndrome Congenital long QT syndrome not provided | Uncertain significance(Last reviewed: Mar 4, 2020)  | criteria provided, multiple submitters, no conflicts | VCV000067374 | 7                | 150950362      | 67374       | 78270       | rs199472988  | Neutral    | 0.728    | 0.162        | 0.11     |
| KCNH2 | 396 | H   | Y   | NM_000238.4(KCNH2):c.1186C>T (p.His396Tyr) | Arrhythmia                                                | Uncertain significance(Last reviewed: Mar 16, 2021) | criteria provided, single submitter                  | VCV001332414 | 7                | 150952796      | 1332414     | 1323132     | NA           | LOF        | 0.785    | 0.096        | 0.119    |
| KCNH2 | 399 | H   | R   | NM_000238.4(KCNH2):c.2216A>G (p.His739Arg) | Long QT syndrome                                          | Uncertain significance(Last reviewed: Oct 1, 2015)  | criteria provided, single submitter                  | VCV000222670 | 7                | 150950350      | 222670      | 224341      | rs869025446  | LOF        | 0.878    | 0.045        | 0.077    |
| KCNH2 | 400 | I   | N   | NM_000238.4(KCNH2):c.1199T>A (p.Ile400Asn) | Congenital long QT syndrome                               | not provided                                        | no assertion provided                                | VCV000067165 | 7                | 150952783      | 67165       | 78061       | rs199472891  | LOF        | 0.885    | 0.044        | 0.071    |
| KCNH2 | 401 | K   | Q   | NM_000238.4(KCNH2):c.2221A>C (p.Lys741Gln) | Arrhythmia                                                | Uncertain significance(Last reviewed: Jun 11, 2019) | criteria provided, single submitter                  | VCV000923298 | 7                | 150950345      | 923298      | 910743      | rs1801092981 | LOF        | 0.876    | 0.035        | 0.089    |
| KCNH2 | 401 | K   | R   | NM_000238.4(KCNH2):c.2222A>G (p.Lys741Arg) | not provided Long QT syndrome                             | Uncertain significance(Last reviewed: Dec 23, 2021) | criteria provided, multiple submitters, no conflicts | VCV000566154 | 7                | 150950344      | 566154      | 561718      | rs538224282  | LOF        | 0.856    | 0.03         | 0.113    |
| KCNH2 | 402 | H   | R   | NM_000238.4(KCNH2):c.1205A>G (p.His402Arg) | Congenital long QT syndrome Long QT syndrome              | Uncertain significance(Last reviewed: Mar 3, 2017)  | criteria provided, single submitter                  | VCV000067166 | 7                | 150952777      | 67166       | 78062       | rs199473506  | LOF        | 0.88     | 0.015        | 0.105    |

| gene  | pos | aa1 | aa2 | Name                                       | Condition(s)                                                                                    | Clinical significance (Last reviewed)                                     | Review status                                        | Accession    | GRCh38Chromosome | GRCh38Location | VariationID | AlleleID(s) | dbSNP ID     | prediction | prob.LOF | prob.Neutral | prob.GOF |
|-------|-----|-----|-----|--------------------------------------------|-------------------------------------------------------------------------------------------------|---------------------------------------------------------------------------|------------------------------------------------------|--------------|------------------|----------------|-------------|-------------|--------------|------------|----------|--------------|----------|
| KCNH2 | 404 | R   | P   | NM_000238.4(KCNH2):c.2231G>C (p.Arg744Pro) | Long QT syndrome                                                                                | Uncertain significance(Last reviewed: Mar 22, 2020)                       | criteria provided, single submitter                  | VCV001017667 | 7                | 150950335      | 1017667     | 1007343     | rs1264176305 | LOF        | 0.877    | 0.041        | 0.082    |
| KCNH2 | 404 | R   | Q   | NM_000238.4(KCNH2):c.2231G>A (p.Arg744Gln) | Arrhythmia                                                                                      | Uncertain significance(Last reviewed: Dec 10, 2020)                       | criteria provided, single submitter                  | VCV000924279 | 7                | 150950335      | 924279      | 910742      | rs1264176305 | LOF        | 0.87     | 0.037        | 0.093    |
| KCNH2 | 406 | A   | S   | NM_000238.4(KCNH2):c.2236G>T (p.Ala746Ser) | not provided Long QT syndrome                                                                   | Uncertain significance(Last reviewed: Oct 20, 2020)                       | criteria provided, multiple submitters, no conflicts | VCV000222671 | 7                | 150950330      | 222671      | 224340      | rs751681463  | LOF        | 0.905    | 0.022        | 0.073    |
| KCNH2 | 409 | G   | C   | NM_000238.4(KCNH2):c.2245G>T (p.Gly749Cys) | Long QT syndrome                                                                                | Uncertain significance(Last reviewed: Jul 12, 2017)                       | criteria provided, single submitter                  | VCV000405350 | 7                | 150950321      | 405350      | 396142      | rs1060500668 | LOF        | 0.9      | 0.023        | 0.077    |
| KCNH2 | 409 | G   | V   | NM_000238.4(KCNH2):c.2246G>T (p.Gly749Val) | Congenital long QT syndrome not specified not provided                                          | Conflicting interpretations of pathogenicity(Last reviewed: Mar 31, 2016) | criteria provided, conflicting interpretations       | VCV000067378 | 7                | 150950320      | 67378       | 78274       | rs199472989  | LOF        | 0.885    | 0.028        | 0.087    |
| KCNH2 | 409 | V   | E   | NM_000238.4(KCNH2):c.226T>A (p.Val409Glu)  | Cardiovascular phenotype not provided                                                           | Uncertain significance(Last reviewed: Jan 16, 2020)                       | criteria provided, multiple submitters, no conflicts | VCV000200329 | 7                | 150952756      | 200329      | 197289      | rs794728367  | LOF        | 0.897    | 0.021        | 0.082    |
| KCNH2 | 410 | W   | S   | NM_000238.4(KCNH2):c.1229G>C (p.Trp410Ser) | Congenital long QT syndrome                                                                     | not provided                                                              | no assertion provided                                | VCV000067168 | 7                | 150952753      | 67168       | 78064       | rs199472892  | LOF        | 0.924    | 0.017        | 0.059    |
| KCNH2 | 412 | R   | W   | NM_000238.4(KCNH2):c.2254C>T (p.Arg752Trp) | Long QT syndrome Cardiovascular phenotype  Congenital long QT syndrome not provided  Arrhythmia | Pathogenic/Likely pathogenic(Last reviewed: Mar 17, 2021)                 | criteria provided, multiple submitters, no conflicts | VCV000067379 | 7                | 150950312      | 67379       | 78275       | rs199472990  | LOF        | 0.89     | 0.016        | 0.094    |
| KCNH2 | 413 | A   | S   | NM_000238.4(KCNH2):c.2257G>T (p.Ala753Ser) | Congenital long QT syndrome Arrhythmia                                                          | Uncertain significance(Last reviewed: Jan 17, 2020)                       | criteria provided, single submitter                  | VCV000067380 | 7                | 150950309      | 67380       | 78276       | rs199472991  | LOF        | 0.882    | 0.029        | 0.089    |
| KCNH2 | 413 | L   | P   | NM_000238.4(KCNH2):c.1238T>C (p.Leu413Pro) | Congenital long QT syndrome                                                                     | not provided                                                              | no assertion provided                                | VCV000067170 | 7                | 150952744      | 67170       | 78066       | rs199472893  | LOF        | 0.895    | 0.024        | 0.081    |
| KCNH2 | 413 | L   | R   | NM_000238.4(KCNH2):c.1238T>G (p.Leu413Arg) | Long QT syndrome 2                                                                              | Likely pathogenic(Last reviewed: Aug 30, 2016)                            | criteria provided, single submitter                  | VCV000279588 | 7                | 150952744      | 279588      | 263859      | rs199472893  | LOF        | 0.885    | 0.021        | 0.094    |
| KCNH2 | 414 | I   | V   | NM_000238.4(KCNH2):c.1240A>G (p.Ile414Val) | Arrhythmia                                                                                      | Uncertain significance(Last reviewed: Mar 7, 2019)                        | criteria provided, single submitter                  | VCV000924916 | 7                | 150952742      | 924916      | 910776      | rs1801229604 | LOF        | 0.805    | 0.064        | 0.131    |
| KCNH2 | 414 | L   | R   | NM_000238.4(KCNH2):c.2261T>G (p.Leu754Arg) | not provided                                                                                    | Uncertain significance(Last reviewed: Apr 28, 2017)                       | criteria provided, single submitter                  | VCV000200767 | 7                | 150950305      | 200767      | 197223      | rs794728492  | LOF        | 0.895    | 0.019        | 0.086    |
| KCNH2 | 415 | A   | T   | NM_000238.4(KCNH2):c.2263G>A (p.Ala755Thr) | not provided                                                                                    | Likely pathogenic(Last reviewed: Apr 28, 2014)                            | criteria provided, single submitter                  | VCV000200423 | 7                | 150950303      | 200423      | 197222      | rs794728386  | LOF        | 0.889    | 0.022        | 0.089    |
| KCNH2 | 416 | M   | V   | NM_000238.4(KCNH2):c.2266A>G (p.Met756Val) | Long QT syndrome 2 Acquired long QT syndrome                                                    | Likely pathogenic(Last reviewed: Dec 11, 2019)                            | criteria provided, single submitter                  | VCV000067381 | 7                | 150950300      | 67381       | 78277       | rs199473534  | LOF        | 0.824    | 0.058        | 0.118    |
| KCNH2 | 417 | K   | N   | NM_000238.4(KCNH2):c.2271G>C               | Congenital long QT syndrome                                                                     | not provided                                                              | no assertion                                         | VCV000067382 | 7                | 150950295      | 67382       | 78278       | rs199472992  | LOF        | 0.908    | 0.013        | 0.079    |

| gene  | pos | aa1 | aa2 | Name                                       | Condition(s)                                              | Clinical significance (Last reviewed)                                     | Review status                                        | Accession    | GRCh38Chromosome | GRCh38Location | VariationID | AlleleID(s) | dbSNP ID     | prediction | prob.LOF | prob.Neutral | prob.GOF |
|-------|-----|-----|-----|--------------------------------------------|-----------------------------------------------------------|---------------------------------------------------------------------------|------------------------------------------------------|--------------|------------------|----------------|-------------|-------------|--------------|------------|----------|--------------|----------|
|       |     |     |     | (p.Lys757Asn)                              |                                                           |                                                                           | provided                                             |              |                  |                |             |             |              |            |          |              |          |
| KCNH2 | 419 | K   | R   | NM_000238.4(KCNH2):c.2276A>G (p.Lys759Arg) | Long QT syndrome                                          | Uncertain significance(Last reviewed: Feb 18, 2020)                       | criteria provided, single submitter                  | VCV000999182 | 7                | 150950290      | 999182      | 992191      | rs1225877255 | LOF        | 0.891    | 0.016        | 0.092    |
| KCNH2 | 420 | Y   | C   | NM_000238.4(KCNH2):c.1259A>G (p.Tyr420Cys) | Congenital long QT syndrome                               | not provided                                                              | no assertion provided                                | VCV000067171 | 7                | 150952723      | 67171       | 78067       | rs199473507  | LOF        | 0.904    | 0.019        | 0.077    |
| KCNH2 | 421 | T   | K   | NM_000238.4(KCNH2):c.1262C>A (p.Thr421Lys) | not provided                                              | Pathogenic(Last reviewed: Mar 31, 2013)                                   | criteria provided, single submitter                  | VCV000200331 | 7                | 150952720      | 200331      | 197288      | rs199472894  | LOF        | 0.893    | 0.012        | 0.095    |
| KCNH2 | 421 | T   | M   | NM_000238.4(KCNH2):c.1262C>T (p.Thr421Met) | Congenital long QT syndrome not provided Long QT syndrome | Conflicting interpretations of pathogenicity(Last reviewed: Apr 30, 2021) | criteria provided, conflicting interpretations       | VCV000067173 | 7                | 150952720      | 67173       | 78069       | rs199472894  | LOF        | 0.883    | 0.017        | 0.1      |
| KCNH2 | 422 | A   | T   | NM_000238.4(KCNH2):c.1264G>A (p.Ala422Thr) | Congenital long QT syndrome not provided                  | Pathogenic(Last reviewed: Jul 31, 2012)                                   | criteria provided, single submitter                  | VCV000067174 | 7                | 150952718      | 67174       | 78070       | rs199472895  | LOF        | 0.873    | 0.029        | 0.099    |
| KCNH2 | 424 | P   | L   | NM_000238.4(KCNH2):c.2291C>T (p.Pro764Leu) | Long QT syndrome Arrhythmia                               | Uncertain significance(Last reviewed: Dec 23, 2019)                       | criteria provided, multiple submitters, no conflicts | VCV000237296 | 7                | 150950275      | 237296      | 239996      | rs878853773  | LOF        | 0.886    | 0.025        | 0.09     |
| KCNH2 | 426 | G   | R   | NM_000238.4(KCNH2):c.2296G>A (p.Gly766Arg) | Cardiovascular phenotype                                  | Uncertain significance(Last reviewed: Sep 2, 2017)                        | criteria provided, single submitter                  | VCV000519498 | 7                | 150950270      | 519498      | 509860      | rs1057524377 | LOF        | 0.909    | 0.006        | 0.085    |
| KCNH2 | 426 | G   | W   | NM_000238.4(KCNH2):c.2296G>T (p.Gly766Trp) | not provided                                              | Uncertain significance(Last reviewed: Dec 22, 2016)                       | criteria provided, single submitter                  | VCV000392164 | 7                | 150950270      | 392164      | 369591      | rs1057524377 | LOF        | 0.913    | 0.008        | 0.079    |
| KCNH2 | 426 | P   | H   | NM_000238.4(KCNH2):c.1277C>A (p.Pro426His) | Congenital long QT syndrome                               | not provided                                                              | no assertion provided                                | VCV000067175 | 7                | 150952705      | 67175       | 78071       | rs199472896  | LOF        | 0.925    | 0.006        | 0.069    |
| KCNH2 | 427 | D   | Y   | NM_000238.4(KCNH2):c.2299G>T (p.Asp767Tyr) | Congenital long QT syndrome                               | not provided                                                              | no assertion provided                                | VCV000067383 | 7                | 150950267      | 67383       | 78279       | rs199472993  | LOF        | 0.899    | 0.013        | 0.088    |
| KCNH2 | 427 | Y   | C   | NM_000238.4(KCNH2):c.1280A>G (p.Tyr427Cys) | Long QT syndrome 1 Congenital long QT syndrome            | Likely pathogenic(Last reviewed: Mar 16, 2017)                            | criteria provided, single submitter                  | VCV000067179 | 7                | 150952702      | 67179       | 78075       | rs199472897  | LOF        | 0.918    | 0.017        | 0.065    |
| KCNH2 | 427 | Y   | H   | NM_000238.4(KCNH2):c.1279T>C (p.Tyr427His) | Congenital long QT syndrome                               | not provided                                                              | no assertion provided                                | VCV000067176 | 7                | 150952703      | 67176       | 78072       | rs199472898  | LOF        | 0.917    | 0.015        | 0.068    |
| KCNH2 | 427 | Y   | S   | NM_000238.4(KCNH2):c.1280A>C (p.Tyr427Ser) | Congenital long QT syndrome Cardiovascular phenotype      | Likely pathogenic(Last reviewed: Nov 7, 2016)                             | criteria provided, multiple submitters, no conflicts | VCV000067178 | 7                | 150952702      | 67178       | 78074       | rs199472897  | LOF        | 0.922    | 0.014        | 0.063    |
| KCNH2 | 428 | S   | L   | NM_000238.4(KCNH2):c.1283C>T (p.Ser428Leu) | Congenital long QT syndrome not provided                  | Uncertain significance(Last reviewed: Jan 19, 2021)                       | criteria provided, single submitter                  | VCV000067180 | 7                | 150952699      | 67180       | 78076       | rs199472899  | LOF        | 0.863    | 0.024        | 0.113    |
| KCNH2 | 428 | S   | P   | NM_000238.4(KCNH2):c.1282T>C (p.Ser428Pro) | not provided                                              | Likely pathogenic(Last reviewed: Mar 26, 2014)                            | criteria provided, single submitter                  | VCV000200335 | 7                | 150952700      | 200335      | 197287      | rs794728368  | LOF        | 0.898    | 0.016        | 0.086    |
| KCNH2 | 429 | A   | P   | NM_000238.4(KCNH2):c.1285G>C (p.Ala429Pro) | Congenital long QT syndrome                               | not provided                                                              | no assertion provided                                | VCV000067181 | 7                | 150952697      | 67181       | 78077       | rs199473508  | LOF        | 0.916    | 0.015        | 0.069    |
| KCNH2 | 430 | V   | A   | NM_000238.4(KCNH2):c.2309T>C (p.Val770Ala) | Congenital long QT syndrome                               | not provided                                                              | no assertion provided                                | VCV000067384 | 7                | 150950257      | 67384       | 78280       | rs199472994  | LOF        | 0.895    | 0.023        | 0.082    |
| KCNH2 | 431 | F   | L   | NM_000238.4(KCNH2):c.1291T>C               | Cardiovascular phenotype Long QT syndrome                 | Uncertain                                                                 | criteria                                             | VCV000519399 | 7                | 150952691      | 519399      | 509868      | rs1554426244 | LOF        | 0.881    | 0.036        | 0.083    |

| gene  | pos | aa1 | aa2 | Name                                            | Condition(s)                                                         | Clinical significance (Last reviewed)                     | Review status                                        | Accession    | GRCh38Chromosome | GRCh38Location        | VariationID | AlleleID(s) | dbSNP ID     | prediction | prob.LOF | prob.Neutral | prob.GOF |
|-------|-----|-----|-----|-------------------------------------------------|----------------------------------------------------------------------|-----------------------------------------------------------|------------------------------------------------------|--------------|------------------|-----------------------|-------------|-------------|--------------|------------|----------|--------------|----------|
|       |     |     |     | (p.Phe431Leu)                                   |                                                                      | significance(Last reviewed: Feb 1, 2020)                  | provided, multiple submitters, no conflicts          |              |                  |                       |             |             |              |            |          |              |          |
| KCNH2 | 431 | F   | L   | NM_000238.4(KCNH2):c.1291T>C (p.Phe431Leu)      | Cardiovascular phenotypeLong QT syndrome                             | Uncertain significance(Last reviewed: Feb 1, 2020)        | criteria provided, multiple submitters, no conflicts | VCV000519399 | 7                | 150952691             | 519399      | 509868      | rs1554426244 | LOF        | 0.881    | 0.036        | 0.083    |
| KCNH2 | 431 | F   | L   | NM_000238.4(KCNH2):c.1293C>A (p.Phe431Leu)      | Congenital long QT syndrome not provided                             | Likely pathogenic(Last reviewed: May 10, 2018)            | criteria provided, single submitter                  | VCV000067183 | 7                | 150952689             | 67183       | 78079       | rs199472900  | LOF        | 0.881    | 0.036        | 0.083    |
| KCNH2 | 431 | F   | L   | NM_000238.4(KCNH2):c.1293C>A (p.Phe431Leu)      | Congenital long QT syndrome not provided                             | Likely pathogenic(Last reviewed: May 10, 2018)            | criteria provided, single submitter                  | VCV000067183 | 7                | 150952689             | 67183       | 78079       | rs199472900  | LOF        | 0.881    | 0.036        | 0.083    |
| KCNH2 | 431 | H   | P   | NM_000238.4(KCNH2):c.2312A>C (p.His771Pro)      | Long QT syndrome                                                     | Uncertain significance(Last reviewed: Nov 8, 2019)        | criteria provided, single submitter                  | VCV000964746 | 7                | 150950254             | 964746      | 955094      | rs1060500659 | LOF        | 0.914    | 0.015        | 0.07     |
| KCNH2 | 431 | H   | R   | NM_000238.4(KCNH2):c.2312A>G (p.His771Arg)      | Long QT syndrome                                                     | Uncertain significance(Last reviewed: Oct 24, 2018)       | criteria provided, single submitter                  | VCV000405338 | 7                | 150950254             | 405338      | 395485      | rs1060500659 | LOF        | 0.885    | 0.014        | 0.101    |
| KCNH2 | 434 | D   | Y   | NM_000238.4(KCNH2):c.2320G>T (p.Asp774Tyr)      | Congenital long QT syndrome not provided Long QT syndrome 2          | Pathogenic/Likely pathogenic(Last reviewed: May 10, 2017) | criteria provided, multiple submitters, no conflicts | VCV000067385 | 7                | 150950246             | 67385       | 78281       | rs199472995  | LOF        | 0.692    | 0.118        | 0.19     |
| KCNH2 | 436 | L   | F   | NM_000238.4(KCNH2):c.2326C>T (p.Leu776Phe)      | not provided                                                         | Likely pathogenic(Last reviewed: Sep 17, 2012)            | criteria provided, single submitter                  | VCV000200425 | 7                | 150950240             | 200425      | 197221      | rs771674303  | Neutral    | 0.566    | 0.313        | 0.121    |
| KCNH2 | 436 | T   | M   | NM_000238.4(KCNH2):c.1307C>T (p.Thr436Met)      | Arrhythmia Long QT syndrome Congenital long QT syndrome not provided | Uncertain significance(Last reviewed: Aug 26, 2020)       | criteria provided, multiple submitters, no conflicts | VCV000067184 | 7                | 150952675             | 67184       | 78080       | rs199472901  | Neutral    | 0.473    | 0.403        | 0.124    |
| KCNH2 | 438 | A   | T   | NM_000238.4(KCNH2):c.2332G>A (p.Ala778Thr)      | Long QT syndrome 2                                                   | Uncertain significance                                    | criteria provided, single submitter                  | VCV000979128 | 7                | 150950234             | 979128      | 967184      | rs769076001  | GOF        | 0.524    | 0.218        | 0.258    |
| KCNH2 | 441 | F   | L   | NM_000238.4(KCNH2):c.2343C>G (p.Phe781Leu)      | Cardiovascular phenotype                                             | Uncertain significance(Last reviewed: Dec 23, 2015)       | criteria provided, single submitter                  | VCV000264633 | 7                | 150950223             | 264633      | 258469      | rs886039215  | Neutral    | 0.549    | 0.28         | 0.171    |
| KCNH2 | 442 | A   | V   | NM_000238.4(KCNH2):c.1325C>T (p.Ala442Val)      | Long QT syndrome Long QT syndrome 2 Short QT syndrome 1              | Uncertain significance(Last reviewed: Aug 31, 2018)       | criteria provided, multiple submitters, no conflicts | VCV000456885 | 7                | 150952657             | 456885      | 456848      | rs1554426225 | Neutral    | 0.575    | 0.255        | 0.17     |
| KCNH2 | 442 | I   | T   | NM_000238.4(KCNH2):c.2345T>C (p.Ile782Thr)      | Long QT syndrome                                                     | Uncertain significance(Last reviewed: Apr 23, 2019)       | no assertion criteria provided                       | VCV000977169 | 7                | 150950221             | 977169      | 965302      | rs1801085857 | Neutral    | 0.619    | 0.226        | 0.155    |
| KCNH2 | 444 | R   | P   | NM_000238.4(KCNH2):c.2351_2352inv (p.Arg784Pro) | not provided Long QT syndrome                                        | Uncertain significance(Last reviewed: Jun 4, 2021)        | criteria provided, multiple submitters, no conflicts | VCV000660517 | 7                | 150950214 - 150950215 | 660517      | 635897      | NA           | Neutral    | 0.551    | 0.23         | 0.219    |
| KCNH2 | 445 | G   | A   | NM_000238.4(KCNH2):c.2354G>C (p.Gly785Ala)      | Congenital long QT syndrome                                          | not provided                                              | no assertion provided                                | VCV000067387 | 7                | 150950212             | 67387       | 78283       | rs199472996  | Neutral    | 0.706    | 0.153        | 0.141    |

| gene  | pos | aa1 | aa2 | Name                                       | Condition(s)                                                                                                                        | Clinical significance (Last reviewed)                                     | Review status                                        | Accession    | GRCh38Chromosome | GRCh38Location | VariationID | AlleleID(s) | dbSNP ID     | prediction | prob.LOF | prob.Neutral | prob.GOF |
|-------|-----|-----|-----|--------------------------------------------|-------------------------------------------------------------------------------------------------------------------------------------|---------------------------------------------------------------------------|------------------------------------------------------|--------------|------------------|----------------|-------------|-------------|--------------|------------|----------|--------------|----------|
| KCNH2 | 445 | G   | V   | NM_000238.4(KCNH2):c.2354G>T (p.Gly785Val) | Congenital long QT syndrome                                                                                                         | not provided                                                              | no assertion provided                                | VCV000067388 | 7                | 150950212      | 67388       | 78284       | rs199472996  | Neutral    | 0.688    | 0.17         | 0.142    |
| KCNH2 | 447 | I   | N   | NM_000238.4(KCNH2):c.2360T>A (p.Ile787Asn) | Long QT syndrome not provided                                                                                                       | Conflicting interpretations of pathogenicity(Last reviewed: Oct 3, 2019)  | criteria provided, conflicting interpretations       | VCV000200428 | 7                | 150950206      | 200428      | 197220      | rs794728387  | LOF        | 0.752    | 0.121        | 0.126    |
| KCNH2 | 448 | E   | D   | NM_000238.4(KCNH2):c.2364G>C (p.Glu788Asp) | Congenital long QT syndrome                                                                                                         | not provided                                                              | no assertion provided                                | VCV000067390 | 7                | 150950202      | 67390       | 78286       | rs199473535  | LOF        | 0.83     | 0.026        | 0.144    |
| KCNH2 | 448 | E   | K   | NM_000238.4(KCNH2):c.2362G>A (p.Glu788Lys) | Long QT syndrome Congenital long QT syndrome                                                                                        | Likely pathogenic(Last reviewed: Feb 11, 2016)                            | criteria provided, single submitter                  | VCV000067389 | 7                | 150950204      | 67389       | 78285       | rs199472997  | LOF        | 0.798    | 0.024        | 0.178    |
| KCNH2 | 449 | I   | T   | NM_000238.4(KCNH2):c.2366T>C (p.Ile789Thr) | Long QT syndrome Cardiovascular phenotype                                                                                           | Uncertain significance(Last reviewed: Oct 9, 2019)                        | criteria provided, multiple submitters, no conflicts | VCV000200431 | 7                | 150950200      | 200431      | 197219      | rs794728388  | LOF        | 0.821    | 0.082        | 0.098    |
| KCNH2 | 450 | L   | P   | NM_000238.4(KCNH2):c.2369T>C (p.Leu790Pro) | Long QT syndrome                                                                                                                    | Uncertain significance(Last reviewed: May 15, 2020)                       | criteria provided, single submitter                  | VCV001027323 | 7                | 150950197      | 1027323     | 1007342     | rs1801084514 | LOF        | 0.883    | 0.031        | 0.086    |
| KCNH2 | 451 | R   | Q   | NM_000238.4(KCNH2):c.2372G>A (p.Arg791Gln) | Long QT syndrome Arrhythmia                                                                                                         | Uncertain significance(Last reviewed: Feb 25, 2020)                       | criteria provided, multiple submitters, no conflicts | VCV000925151 | 7                | 150950194      | 925151      | 910738      | rs770393669  | LOF        | 0.879    | 0.015        | 0.106    |
| KCNH2 | 451 | R   | W   | NM_000238.4(KCNH2):c.2371C>T (p.Arg791Trp) | Long QT syndrome not provided Cardiovascular phenotype Long QT syndrome 2 Arrhythmia Brugada syndrome 1 Congenital long QT syndrome | Conflicting interpretations of pathogenicity(Last reviewed: Oct 23, 2020) | criteria provided, conflicting interpretations       | VCV000067391 | 7                | 150950195      | 67391       | 78287       | rs138498207  | LOF        | 0.858    | 0.026        | 0.116    |
| KCNH2 | 454 | V   | I   | NM_000238.4(KCNH2):c.2380G>A (p.Val794Ile) | Arrhythmia not provided Long QT syndrome                                                                                            | Uncertain significance(Last reviewed: Nov 18, 2020)                       | criteria provided, multiple submitters, no conflicts | VCV000200434 | 7                | 150950186      | 200434      | 197218      | rs565006344  | LOF        | 0.847    | 0.044        | 0.11     |
| KCNH2 | 455 | V   | I   | NM_000238.4(KCNH2):c.2383G>A (p.Val795Ile) | Arrhythmia                                                                                                                          | Uncertain significance(Last reviewed: Dec 4, 2020)                        | criteria provided, single submitter                  | VCV001171063 | 7                | 150950183      | 1171063     | 1160694     | NA           | LOF        | 0.832    | 0.047        | 0.121    |
| KCNH2 | 456 | V   | G   | NM_000238.4(KCNH2):c.2387T>G (p.Val796Gly) | Cardiovascular phenotype                                                                                                            | Uncertain significance(Last reviewed: Nov 20, 2017)                       | criteria provided, single submitter                  | VCV000518748 | 7                | 150950179      | 518748      | 509859      | rs1554425163 | LOF        | 0.921    | 0.013        | 0.066    |
| KCNH2 | 456 | V   | L   | NM_000238.4(KCNH2):c.2386G>C (p.Val796Leu) | Long QT syndrome                                                                                                                    | Uncertain significance(Last reviewed: Sep 24, 2020)                       | criteria provided, single submitter                  | VCV000200438 | 7                | 150950180      | 200438      | 197216      | rs143335921  | LOF        | 0.866    | 0.03         | 0.104    |
| KCNH2 | 457 | A   | D   | NM_000238.4(KCNH2):c.2390C>A (p.Ala797Asp) | not provided not specified                                                                                                          | Likely pathogenic(Last reviewed: Jun 12, 2013)                            | criteria provided, single submitter                  | VCV000200440 | 7                | 150950176      | 200440      | 197215      | rs794728389  | LOF        | 0.909    | 0.014        | 0.077    |
| KCNH2 | 458 | I   | F   | NM_000238.4(KCNH2):c.1372A>T (p.Ile458Phe) | Long QT syndrome                                                                                                                    | Uncertain significance(Last reviewed: Jul 21, 2017)                       | criteria provided, single submitter                  | VCV000456887 | 7                | 150952610      | 456887      | 457100      | rs374303744  | LOF        | 0.843    | 0.041        | 0.116    |
| KCNH2 | 459 | L   | P   | NM_000238.4(KCNH2):c.2396T>C (p.Leu799Pro) | not provided                                                                                                                        | Likely pathogenic(Last reviewed: Aug 13, 2019)                            | criteria provided, single submitter                  | VCV000200442 | 7                | 150950170      | 200442      | 197213      | rs794728390  | LOF        | 0.912    | 0.019        | 0.068    |

| gene  | pos | aa1 | aa2 | Name                                       | Condition(s)                                                                       | Clinical significance (Last reviewed)                                     | Review status                                        | Accession    | GRCh38Chromosome | GRCh38Location | VariationID | AlleleID(s) | dbSNP ID     | prediction | prob.LOF | prob.Neutral | prob.GOF |
|-------|-----|-----|-----|--------------------------------------------|------------------------------------------------------------------------------------|---------------------------------------------------------------------------|------------------------------------------------------|--------------|------------------|----------------|-------------|-------------|--------------|------------|----------|--------------|----------|
| KCNH2 | 460 | G   | C   | NM_000238.4(KCNH2):c.2398G>T (p.Gly800Trp) | Congenital long QT syndrome                                                        | not provided                                                              | no assertion provided                                | VCV000067393 | 7                | 150950168      | 67393       | 78289       | rs199472998  | LOF        | 0.915    | 0.013        | 0.072    |
| KCNH2 | 460 | G   | E   | NM_000238.4(KCNH2):c.2399G>A (p.Gly800Glu) | Congenital long QT syndrome                                                        | not provided                                                              | no assertion provided                                | VCV000067394 | 7                | 150949049      | 67394       | 78290       | rs199473536  | LOF        | 0.908    | 0.009        | 0.083    |
| KCNH2 | 462 | N   | S   | NM_000238.4(KCNH2):c.2405A>G (p.Asn802Ser) | Long QT syndrome                                                                   | Uncertain significance(Last reviewed: Feb 12, 2015)                       | criteria provided, single submitter                  | VCV000216326 | 7                | 150949043      | 216326      | 212568      | rs863224632  | LOF        | 0.908    | 0.015        | 0.078    |
| KCNH2 | 465 | F   | C   | NM_000238.4(KCNH2):c.2414T>G (p.Phe805Cys) | Long QT syndrome not provided Cardiovascular phenotype Congenital long QT syndrome | Pathogenic/Likely pathogenic(Last reviewed: Jul 7, 2017)                  | criteria provided, multiple submitters, no conflicts | VCV000067397 | 7                | 150949034      | 67397       | 78293       | rs199472999  | LOF        | 0.899    | 0.027        | 0.074    |
| KCNH2 | 465 | F   | S   | NM_000238.4(KCNH2):c.2414T>C (p.Phe805Ser) | Congenital long QT syndrome not provided                                           | Pathogenic(Last reviewed: Feb 2, 2012)                                    | criteria provided, single submitter                  | VCV000067396 | 7                | 150949034      | 67396       | 78292       | rs199472999  | LOF        | 0.91     | 0.021        | 0.069    |
| KCNH2 | 466 | D   | G   | NM_000238.4(KCNH2):c.1397A>G (p.Asp466Gly) | Long QT syndrome 2                                                                 | Uncertain significance(Last reviewed: Jan 13, 2018)                       | criteria provided, single submitter                  | VCV000909781 | 7                | 150952585      | 909781      | 897672      | rs1584856497 | LOF        | 0.904    | 0.012        | 0.084    |
| KCNH2 | 466 | D   | V   | NM_000238.4(KCNH2):c.1397A>T (p.Asp466Val) | Long QT syndrome                                                                   | Uncertain significance(Last reviewed: Dec 7, 2018)                        | criteria provided, single submitter                  | VCV000646851 | 7                | 150952585      | 646851      | 635913      | rs1584856497 | LOF        | 0.897    | 0.014        | 0.089    |
| KCNH2 | 466 | G   | A   | NM_000238.4(KCNH2):c.2417G>C (p.Gly806Ala) | not provided                                                                       | Pathogenic(Last reviewed: Aug 16, 2012)                                   | criteria provided, single submitter                  | VCV000200453 | 7                | 150949031      | 200453      | 197203      | rs199473000  | LOF        | 0.912    | 0.014        | 0.074    |
| KCNH2 | 466 | G   | E   | NM_000238.4(KCNH2):c.2417G>A (p.Gly806Glu) | Congenital long QT syndrome not provided Long QT syndrome                          | Conflicting interpretations of pathogenicity(Last reviewed: Mar 12, 2021) | criteria provided, conflicting interpretations       | VCV000067398 | 7                | 150949031      | 67398       | 78294       | rs199473000  | LOF        | 0.912    | 0.009        | 0.079    |
| KCNH2 | 470 | N   | D   | NM_000238.4(KCNH2):c.1408A>G (p.Asn470Asp) | Congenital long QT syndrome Long QT syndrome 2                                     | Pathogenic(Last reviewed: Feb 17, 2006)                                   | no assertion criteria provided                       | VCV000014421 | 7                | 150952574      | 14421       | 29460       | rs121912505  | LOF        | 0.891    | 0.009        | 0.1      |
| KCNH2 | 473 | A   | T   | NM_000238.4(KCNH2):c.2437G>A (p.Ala813Thr) | not specified                                                                      | Uncertain significance(Last reviewed: May 6, 2019)                        | criteria provided, single submitter                  | VCV000928527 | 7                | 150949011      | 928527      | 917004      | rs1801032078 | LOF        | 0.871    | 0.038        | 0.09     |
| KCNH2 | 478 | S   | P   | NM_000238.4(KCNH2):c.2452T>C (p.Ser818Pro) | Congenital long QT syndrome                                                        | not provided                                                              | no assertion provided                                | VCV000067400 | 7                | 150948996      | 67400       | 78296       | rs199473537  | LOF        | 0.795    | 0.084        | 0.121    |
| KCNH2 | 479 | A   | G   | NM_000238.4(KCNH2):c.2398+58C>G            | Arrhythmia                                                                         | Likely benign(Last reviewed: Sep 4, 2019)                                 | criteria provided, single submitter                  | VCV000927904 | 7                | 150950110      | 927904      | 915876      | rs774109163  | LOF        | 0.857    | 0.048        | 0.096    |
| KCNH2 | 480 | G   | R   | NM_000238.4(KCNH2):c.2458G>A (p.Gly820Arg) | Arrhythmia Congenital long QT syndrome not provided                                | Uncertain significance(Last reviewed: Jan 30, 2020)                       | criteria provided, multiple submitters, no conflicts | VCV000067401 | 7                | 150948990      | 67401       | 78297       | rs199473001  | LOF        | 0.809    | 0.061        | 0.13     |
| KCNH2 | 482 | V   | L   | NM_000238.4(KCNH2):c.2464G>C (p.Val822Leu) | not provided                                                                       | Likely pathogenic(Last reviewed: Jun 15, 2017)                            | criteria provided, single submitter                  | VCV000200456 | 7                | 150948984      | 200456      | 197199      | rs121912506  | LOF        | 0.873    | 0.047        | 0.08     |
| KCNH2 | 483 | R   | Q   | NM_000238.4(KCNH2):c.2468G>A (p.Arg823Gln) | Long QT syndrome not provided Arrhythmia                                           | Conflicting interpretations of pathogenicity(Last reviewed: Oct 15, 2020) | criteria provided, conflicting interpretations       | VCV000418246 | 7                | 150948980      | 418246      | 407055      | rs1064793147 | LOF        | 0.884    | 0.048        | 0.068    |
| KCNH2 | 483 | R   | W   | NM_000238.4(KCNH2):c.2467C>T (p.Arg823Trp) | Long QT syndrome Congenital long QT syndrome not provided Cardiovascular           | Pathogenic/Likely pathogenic(Last reviewed: Oct 15, 2020)                 | criteria provided,                                   | VCV000067402 | 7                | 150948981      | 67402       | 78298       | rs199473538  | LOF        | 0.882    | 0.047        | 0.071    |



| gene  | pos | aa1 | aa2 | Name                                       | Condition(s)                                                                                                       | Clinical significance (Last reviewed)                                     | Review status                                        | Accession    | GRCh38Chromosome | GRCh38Location | VariationID | AlleleID(s) | dbSNP ID     | prediction | prob.LOF | prob.Neutral | prob.GOF |
|-------|-----|-----|-----|--------------------------------------------|--------------------------------------------------------------------------------------------------------------------|---------------------------------------------------------------------------|------------------------------------------------------|--------------|------------------|----------------|-------------|-------------|--------------|------------|----------|--------------|----------|
|       |     |     |     |                                            | phenotype                                                                                                          | reviewed: Nov 7, 2021)                                                    | multiple submitters, no conflicts                    |              |                  |                |             |             |              |            |          |              |          |
| KCNH2 | 483 | V   | I   | NM_000238.4(KCNH2):c.1447G>A (p.Val483Ile) | Arrhythmialong QT syndrome                                                                                         | Uncertain significance(Last reviewed: Sep 16, 2020)                       | criteria provided, multiple submitters, no conflicts | VCV000858924 | 7                | 150952535      | 858924      | 833341      | rs755834128  | LOF        | 0.874    | 0.05         | 0.076    |
| KCNH2 | 486 | T   | I   | NM_000238.4(KCNH2):c.2477C>T (p.Thr826Ile) | Congenital long QT syndrome not provided                                                                           | Pathogenic(Last reviewed: Jun 12, 2013)                                   | criteria provided, single submitter                  | VCV000067403 | 7                | 150948971      | 67403       | 78299       | rs199473002  | LOF        | 0.883    | 0.031        | 0.086    |
| KCNH2 | 488 | C   | R   | NM_000238.4(KCNH2):c.2482T>C (p.Cys828Arg) | Long QT syndrome                                                                                                   | Uncertain significance(Last reviewed: Mar 15, 2019)                       | criteria provided, single submitter                  | VCV000842229 | 7                | 150948966      | 842229      | 833335      | rs1801029729 | LOF        | 0.832    | 0.027        | 0.141    |
| KCNH2 | 489 | D   | A   | NM_000238.4(KCNH2):c.2486A>C (p.Asp829Ala) | Long QT syndrome                                                                                                   | Uncertain significance(Last reviewed: Apr 1, 2020)                        | criteria provided, single submitter                  | VCV000851362 | 7                | 150948962      | 851362      | 833334      | rs1210175432 | LOF        | 0.914    | 0.014        | 0.073    |
| KCNH2 | 490 | A   | T   | NM_000238.4(KCNH2):c.1468G>A (p.Ala490Thr) | Long QT syndrome 2 not provided Congenital long QT syndrome Long QT syndrome, bradycardia-induced Long QT syndrome | Pathogenic(Last reviewed: Sep 21, 2019)                                   | criteria provided, multiple submitters, no conflicts | VCV000014430 | 7                | 150952514      | 14430       | 29469       | rs28928905   | LOF        | 0.89     | 0.026        | 0.084    |
| KCNH2 | 490 | A   | V   | NM_000238.4(KCNH2):c.1469C>T (p.Ala490Val) | Long QT syndrome 2 Long QT syndrome Inborn genetic diseases                                                        | Conflicting interpretations of pathogenicity(Last reviewed: Aug 20, 2020) | criteria provided, conflicting interpretations       | VCV000862292 | 7                | 150952513      | 862292      | 833340      | rs1801214475 | LOF        | 0.88     | 0.028        | 0.092    |
| KCNH2 | 492 | H   | L   | NM_000238.4(KCNH2):c.1475A>T (p.His492Leu) | Long QT syndrome                                                                                                   | Uncertain significance(Last reviewed: Jun 14, 2018)                       | criteria provided, single submitter                  | VCV000581371 | 7                | 150952507      | 581371      | 561738      | rs1563160015 | LOF        | 0.876    | 0.027        | 0.098    |
| KCNH2 | 493 | Y   | H   | NM_000238.4(KCNH2):c.1477T>C (p.Tyr493His) | Long QT syndrome                                                                                                   | Uncertain significance(Last reviewed: Jul 12, 2018)                       | criteria provided, single submitter                  | VCV000658590 | 7                | 150952505      | 658590      | 635912      | rs1584856217 | LOF        | 0.923    | 0.012        | 0.065    |
| KCNH2 | 495 | L   | R   | NM_000238.4(KCNH2):c.2398+106T>G           | Arrhythmia                                                                                                         | Likely benign(Last reviewed: Nov 16, 2018)                                | criteria provided, single submitter                  | VCV000919939 | 7                | 150950062      | 919939      | 916154      | rs1489831109 | LOF        | 0.89     | 0.018        | 0.092    |
| KCNH2 | 495 | R   | Q   | NM_000238.4(KCNH2):c.2504G>A (p.Arg835Gln) | not provided                                                                                                       | Uncertain significance(Last reviewed: Aug 14, 2019)                       | criteria provided, single submitter                  | VCV000200464 | 7                | 150948944      | 200464      | 197197      | rs794728395  | LOF        | 0.893    | 0.014        | 0.094    |
| KCNH2 | 495 | R   | W   | NM_000238.4(KCNH2):c.2503C>T (p.Arg835Trp) | Congenital long QT syndrome                                                                                        | not provided                                                              | no assertion provided                                | VCV000067404 | 7                | 150948945      | 67404       | 78300       | rs199473003  | LOF        | 0.885    | 0.017        | 0.098    |
| KCNH2 | 497 | D   | G   | NM_000238.4(KCNH2):c.2510A>G (p.Asp837Gly) | Long QT syndrome Arrhythmialong QT syndrome 2 not provided Congenital long QT syndrome                             | Pathogenic/Likely pathogenic(Last reviewed: Jan 25, 2022)                 | criteria provided, multiple submitters, no conflicts | VCV000067407 | 7                | 150948938      | 67407       | 78303       | rs199473004  | LOF        | 0.918    | 0.015        | 0.067    |
| KCNH2 | 497 | D   | N   | NM_000238.4(KCNH2):c.2509G>A (p.Asp837Asn) | Congenital long QT syndrome Long QT syndrome Long QT syndrome 2                                                    | Pathogenic/Likely pathogenic(Last reviewed: Feb 7, 2020)                  | criteria provided, multiple submitters, no conflicts | VCV000067405 | 7                | 150948939      | 67405       | 78301       | rs199473005  | LOF        | 0.911    | 0.013        | 0.076    |
| KCNH2 | 497 | D   | Y   | NM_000238.4(KCNH2):c.2509G>T (p.Asp837Tyr) | Congenital long QT syndrome                                                                                        | not provided                                                              | no assertion provided                                | VCV000067406 | 7                | 150948939      | 67406       | 78302       | rs199473005  | LOF        | 0.894    | 0.014        | 0.092    |
| KCNH2 | 497 | G   | V   | NM_000238.4(KCNH2):c.2398+112G>T           | Arrhythmia                                                                                                         | Likely benign(Last reviewed: Aug 11, 2019)                                | criteria provided, single submitter                  | VCV000926469 | 7                | 150950056      | 926469      | 915868      | rs771057684  | LOF        | 0.89     | 0.024        | 0.087    |

| gene  | pos | aa1 | aa2 | Name                                       | Condition(s)                                              | Clinical significance (Last reviewed)                                     | Review status                                        | Accession    | GRCh38Chromosome | GRCh38Location | VariationID | AlleleID(s) | dbSNP ID     | prediction | prob.LOF | prob.Neutral | prob.GOF |
|-------|-----|-----|-----|--------------------------------------------|-----------------------------------------------------------|---------------------------------------------------------------------------|------------------------------------------------------|--------------|------------------|----------------|-------------|-------------|--------------|------------|----------|--------------|----------|
| KCNH2 | 499 | L   | M   | NM_000238.4(KCNH2):c.2515C>A (p.Leu839Met) | Long QT syndrome Arrhythmia                               | Uncertain significance(Last reviewed: Mar 10, 2020)                       | criteria provided, multiple submitters, no conflicts | VCV000920490 | 7                | 150948933      | 920490      | 910732      | rs1801028129 | LOF        | 0.835    | 0.058        | 0.107    |
| KCNH2 | 502 | L   | P   | NM_000238.4(KCNH2):c.2525T>C (p.Leu842Pro) | Cardiovascular phenotype                                  | Uncertain significance(Last reviewed: Jun 22, 2017)                       | criteria provided, single submitter                  | VCV000519212 | 7                | 150948923      | 519212      | 509857      | rs1554424818 | LOF        | 0.909    | 0.023        | 0.068    |
| KCNH2 | 504 | M   | V   | NM_000238.4(KCNH2):c.2530A>G (p.Met844Val) | not provided Long QT syndrome Arrhythmia                  | Uncertain significance(Last reviewed: Oct 14, 2020)                       | criteria provided, multiple submitters, no conflicts | VCV000658202 | 7                | 150948918      | 658202      | 635896      | rs754565340  | LOF        | 0.869    | 0.034        | 0.096    |
| KCNH2 | 506 | P   | A   | NM_000238.4(KCNH2):c.2536C>G (p.Pro846Ala) | Long QT syndrome 2                                        | Uncertain significance(Last reviewed: Jun 1, 2014)                        | no assertion criteria provided                       | VCV000161254 | 7                | 150948912      | 161254      | 171107      | rs199473006  | LOF        | 0.899    | 0.026        | 0.074    |
| KCNH2 | 506 | P   | L   | NM_000238.4(KCNH2):c.2537C>T (p.Pro846Leu) | Long QT syndrome                                          | Uncertain significance(Last reviewed: Oct 11, 2017)                       | criteria provided, single submitter                  | VCV000405353 | 7                | 150948911      | 405353      | 396141      | rs1060500669 | LOF        | 0.878    | 0.03         | 0.092    |
| KCNH2 | 506 | P   | S   | NM_000238.4(KCNH2):c.2536C>T (p.Pro846Ser) | Congenital long QT syndrome not provided Long QT syndrome | Conflicting interpretations of pathogenicity(Last reviewed: May 20, 2019) | criteria provided, conflicting interpretations       | VCV000067409 | 7                | 150948912      | 67409       | 78305       | rs199473006  | LOF        | 0.916    | 0.017        | 0.067    |
| KCNH2 | 506 | P   | T   | NM_000238.4(KCNH2):c.2536C>A (p.Pro846Thr) | Congenital long QT syndrome                               | not provided                                                              | no assertion provided                                | VCV000067408 | 7                | 150948912      | 67408       | 78304       | rs199473006  | LOF        | 0.909    | 0.02         | 0.072    |
| KCNH2 | 507 | E   | D   | NM_000238.4(KCNH2):c.2541G>T (p.Glu847Asp) | Arrhythmia                                                | Uncertain significance(Last reviewed: Apr 19, 2021)                       | criteria provided, single submitter                  | VCV001332607 | 7                | 150948907      | 1332607     | 1323325     | NA           | LOF        | 0.908    | 0.011        | 0.081    |
| KCNH2 | 507 | P   | A   | NM_000238.4(KCNH2):c.1519C>G (p.Pro507Ala) | Long QT syndrome                                          | Uncertain significance(Last reviewed: Aug 1, 2018)                        | criteria provided, single submitter                  | VCV000656162 | 7                | 150952463      | 656162      | 635910      | rs794728371  | LOF        | 0.918    | 0.015        | 0.067    |
| KCNH2 | 510 | D   | Y   | NM_000238.4(KCNH2):c.2548G>T (p.Asp850Tyr) | Arrhythmia                                                | Uncertain significance(Last reviewed: Jan 28, 2019)                       | criteria provided, single submitter                  | VCV000922966 | 7                | 150948900      | 922966      | 910731      | rs1036885088 | LOF        | 0.897    | 0.015        | 0.088    |
| KCNH2 | 514 | M   | V   | NM_000238.4(KCNH2):c.2398+162A>G           | Arrhythmia                                                | Likely benign(Last reviewed: Dec 13, 2018)                                | criteria provided, single submitter                  | VCV000920091 | 7                | 150950006      | 920091      | 916153      | rs1246310515 | LOF        | 0.836    | 0.061        | 0.103    |
| KCNH2 | 518 | I   | T   | NM_000238.4(KCNH2):c.2573T>C (p.Ile858Thr) | Congenital long QT syndrome                               | not provided                                                              | no assertion provided                                | VCV000067412 | 7                | 150948875      | 67412       | 78308       | rs199473539  | LOF        | 0.869    | 0.043        | 0.087    |
| KCNH2 | 519 | T   | I   | NM_000238.4(KCNH2):c.2576C>T (p.Thr859Ile) | not provided                                              | Uncertain significance(Last reviewed: Dec 31, 2019)                       | criteria provided, single submitter                  | VCV000200469 | 7                | 150948872      | 200469      | 197196      | rs794728396  | LOF        | 0.838    | 0.056        | 0.106    |
| KCNH2 | 521 | N   | H   | NM_000238.4(KCNH2):c.2581A>C (p.Asn861His) | Congenital long QT syndrome                               | not provided                                                              | no assertion provided                                | VCV000067415 | 7                | 150948867      | 67415       | 78311       | rs199473007  | LOF        | 0.89     | 0.015        | 0.095    |
| KCNH2 | 521 | N   | S   | NM_000238.4(KCNH2):c.2582A>G (p.Asn861Ser) | not provided                                              | Pathogenic(Last reviewed: Oct 30, 2013)                                   | criteria provided, single submitter                  | VCV000200471 | 7                | 150948866      | 200471      | 197195      | rs121912513  | LOF        | 0.895    | 0.016        | 0.089    |
| KCNH2 | 521 | N   | T   | NM_000238.4(KCNH2):c.2582A>C (p.Asn861Thr) | Congenital long QT syndrome                               | not provided                                                              | no assertion provided                                | VCV000067416 | 7                | 150948866      | 67416       | 78312       | rs121912513  | LOF        | 0.889    | 0.018        | 0.093    |
| KCNH2 | 523 | L   | M   | NM_000238.4(KCNH2):c.1567C>A (p.Leu523Met) | Long QT syndrome                                          | Uncertain significance(Last reviewed: Dec 24,                             | criteria provided, single submitter                  | VCV000405357 | 7                | 150951826      | 405357      | 396158      | rs1060500671 | LOF        | 0.866    | 0.034        | 0.1      |

| gene  | pos | aa1 | aa2 | Name                                       | Condition(s)                                                            | Clinical significance (Last reviewed)                                     | Review status                                        | Accession    | GRCh38Chromosome | GRCh38Location | VariationID | AlleleID(s) | dbSNP ID     | prediction | prob.LOF | prob.Neutral | prob.GOF |
|-------|-----|-----|-----|--------------------------------------------|-------------------------------------------------------------------------|---------------------------------------------------------------------------|------------------------------------------------------|--------------|------------------|----------------|-------------|-------------|--------------|------------|----------|--------------|----------|
|       |     |     |     |                                            |                                                                         | 2016)                                                                     |                                                      |              |                  |                |             |             |              |            |          |              |          |
| KCNH2 | 523 | R   | Q   | NM_000238.4(KCNH2):c.2588G>A (p.Arg863Gln) | Long QT syndrome                                                        | Uncertain significance(Last reviewed: Aug 11, 2020)                       | criteria provided, single submitter                  | VCV001026816 | 7                | 150948860      | 1026816     | 1007341     | rs939435672  | LOF        | 0.887    | 0.017        | 0.096    |
| KCNH2 | 524 | D   | G   | NM_000238.4(KCNH2):c.2591A>G (p.Asp864Gly) | Congenital long QT syndrome Long QT syndrome                            | Uncertain significance(Last reviewed: Jan 15, 2020)                       | criteria provided, single submitter                  | VCV000067417 | 7                | 150948857      | 67417       | 78313       | rs199473008  | LOF        | 0.91     | 0.013        | 0.077    |
| KCNH2 | 527 | M   | T   | NM_000238.4(KCNH2):c.2600T>C (p.Met867Thr) | Arrhythmia Long QT syndrome                                             | Uncertain significance(Last reviewed: Feb 3, 2020)                        | criteria provided, multiple submitters, no conflicts | VCV000641744 | 7                | 150948536      | 641744      | 635895      | rs752020408  | LOF        | 0.888    | 0.02         | 0.092    |
| KCNH2 | 529 | P   | L   | NM_000238.4(KCNH2):c.2606C>T (p.Pro869Leu) | not provided Brugada syndrome 1 Arrhythmia                              | Uncertain significance(Last reviewed: Dec 13, 2019)                       | criteria provided, multiple submitters, no conflicts | VCV000200473 | 7                | 150948530      | 200473      | 197194      | rs763031434  | LOF        | 0.89     | 0.02         | 0.089    |
| KCNH2 | 531 | S   | F   | NM_000238.4(KCNH2):c.2612C>T (p.Ser871Phe) | Long QT syndrome                                                        | Uncertain significance(Last reviewed: Sep 11, 2019)                       | criteria provided, single submitter                  | VCV000954476 | 7                | 150948524      | 954476      | 945519      | rs1177213407 | LOF        | 0.876    | 0.015        | 0.109    |
| KCNH2 | 533 | G   | S   | NM_000238.4(KCNH2):c.2617G>A (p.Gly873Ser) | not provided Brugada syndrome Long QT syndrome not specified Arrhythmia | Benign/Likely benign(Last reviewed: Dec 2, 2020)                          | criteria provided, multiple submitters, no conflicts | VCV000067419 | 7                | 150948519      | 67419       | 78315       | rs41314354   | LOF        | 0.893    | 0.019        | 0.088    |
| KCNH2 | 535 | T   | M   | NM_000238.4(KCNH2):c.2624C>T (p.Thr875Met) | Long QT syndrome not specified Arrhythmia not provided                  | Conflicting interpretations of pathogenicity(Last reviewed: Aug 11, 2021) | criteria provided, conflicting interpretations       | VCV000067420 | 7                | 150948512      | 67420       | 78316       | rs140743924  | LOF        | 0.871    | 0.023        | 0.105    |
| KCNH2 | 535 | T   | R   | NM_000238.4(KCNH2):c.2624C>G (p.Thr875Arg) | Long QT syndrome                                                        | Uncertain significance(Last reviewed: Jan 26, 2019)                       | criteria provided, single submitter                  | VCV000849676 | 7                | 150948512      | 849676      | 833333      | rs140743924  | LOF        | 0.872    | 0.015        | 0.112    |
| KCNH2 | 538 | E   | D   | NM_000238.4(KCNH2):c.2634G>T (p.Glu878Asp) | not provided                                                            | Uncertain significance(Last reviewed: Jul 26, 2018)                       | criteria provided, single submitter                  | VCV001304037 | 7                | 150948502      | 1304037     | 1294312     | NA           | LOF        | 0.863    | 0.012        | 0.125    |
| KCNH2 | 538 | R   | H   | NM_000238.4(KCNH2):c.2398+235G>A           | not provided                                                            | Uncertain significance(Last reviewed: Dec 24, 2019)                       | criteria provided, single submitter                  | VCV001311311 | 7                | 150949933      | 1311311     | 1300692     | NA           | LOF        | 0.875    | 0.014        | 0.11     |
| KCNH2 | 539 | G   | R   | NM_000238.4(KCNH2):c.2635G>C (p.Gly879Arg) | Congenital long QT syndrome                                             | not provided                                                              | no assertion provided                                | VCV000067421 | 7                | 150948501      | 67421       | 78317       | rs199473040  | LOF        | 0.85     | 0.017        | 0.133    |
| KCNH2 | 539 | G   | S   | NM_000238.4(KCNH2):c.2635G>A (p.Gly879Ser) | Arrhythmia                                                              | Uncertain significance(Last reviewed: Nov 29, 2018)                       | criteria provided, single submitter                  | VCV000924749 | 7                | 150948501      | 924749      | 910726      | rs199473040  | LOF        | 0.89     | 0.022        | 0.088    |
| KCNH2 | 541 | R   | C   | NM_000238.4(KCNH2):c.1621C>T (p.Arg541Cys) | Long QT syndrome Arrhythmia                                             | Uncertain significance(Last reviewed: Oct 7, 2020)                        | criteria provided, multiple submitters, no conflicts | VCV000937094 | 7                | 150951772      | 937094      | 933773      | rs764666519  | LOF        | 0.853    | 0.024        | 0.123    |
| KCNH2 | 543 | R   | Q   | NM_000238.4(KCNH2):c.2648G>A (p.Arg883Gln) | Arrhythmia                                                              | Uncertain significance(Last reviewed: Jan 5, 2021)                        | criteria provided, single submitter                  | VCV001171663 | 7                | 150948488      | 1171663     | 1160692     | NA           | LOF        | 0.839    | 0.019        | 0.143    |
| KCNH2 | 544 | Q   | R   | NM_000238.4(KCNH2):c.2651A>G               | not specified                                                           | Uncertain                                                                 | criteria                                             | VCV000633279 | 7                | 150948485      | 633279      | 621262      | rs1563149602 | LOF        | 0.743    | 0.029        | 0.228    |

| gene  | pos | aa1 | aa2 | Name                                                 | Condition(s)                                                                                           | Clinical significance (Last reviewed)                                     | Review status                                        | Accession    | GRCh38Chromosome | GRCh38Location        | VariationID | AlleleID(s) | dbSNP ID     | prediction | prob.LOF | prob.Neutral | prob.GOF |
|-------|-----|-----|-----|------------------------------------------------------|--------------------------------------------------------------------------------------------------------|---------------------------------------------------------------------------|------------------------------------------------------|--------------|------------------|-----------------------|-------------|-------------|--------------|------------|----------|--------------|----------|
|       |     |     |     | (p.Gln884Arg)                                        |                                                                                                        | significance(Last reviewed: Nov 6, 2017)                                  | provided, single submitter                           |              |                  |                       |             |             |              |            |          |              |          |
| KCNH2 | 545 | R   | C   | NM_000238.4(KCNH2):c.2653C>T (p.Arg885Cys)           | Long QT syndrome Congenital long QT syndrome not specified Arrhythmia                                  | Uncertain significance(Last reviewed: Oct 21, 2020)                       | criteria provided, multiple submitters, no conflicts | VCV000067422 | 7                | 150948483             | 67422       | 78318       | rs143512106  | LOF        | 0.819    | 0.049        | 0.132    |
| KCNH2 | 545 | R   | H   | NM_000238.4(KCNH2):c.2654G>A (p.Arg885His)           | Long QT syndrome not specified Arrhythmia not provided Long QT syndrome 2                              | Uncertain significance(Last reviewed: Nov 26, 2019)                       | criteria provided, multiple submitters, no conflicts | VCV000402995 | 7                | 150948482             | 402995      | 389717      | rs202194495  | LOF        | 0.842    | 0.031        | 0.128    |
| KCNH2 | 545 | R   | S   | NM_000238.4(KCNH2):c.2653C>A (p.Arg885Ser)           | Arrhythmia                                                                                             | Uncertain significance(Last reviewed: Mar 2, 2021)                        | criteria provided, single submitter                  | VCV001332377 | 7                | 150948483             | 1332377     | 1323095     | NA           | LOF        | 0.847    | 0.032        | 0.121    |
| KCNH2 | 547 | A   | T   | NM_000238.4(KCNH2):c.1639G>A (p.Ala547Thr)           | Long QT syndrome Arrhythmia                                                                            | Uncertain significance(Last reviewed: Oct 9, 2020)                        | criteria provided, multiple submitters, no conflicts | VCV000663436 | 7                | 150951754             | 663436      | 635907      | rs376021230  | LOF        | 0.864    | 0.031        | 0.105    |
| KCNH2 | 547 | R   | C   | NM_000238.4(KCNH2):c.2659C>T (p.Arg887Cys)           | not provided Arrhythmia Long QT syndrome                                                               | Uncertain significance(Last reviewed: Jun 25, 2020)                       | criteria provided, multiple submitters, no conflicts | VCV00193802  | 7                | 150948477             | 193802      | 190965      | rs140279503  | LOF        | 0.868    | 0.023        | 0.109    |
| KCNH2 | 547 | R   | G   | NM_000238.4(KCNH2):c.2659C>G (p.Arg887Gly)           | Long QT syndrome Arrhythmia                                                                            | Uncertain significance(Last reviewed: Mar 26, 2021)                       | criteria provided, multiple submitters, no conflicts | VCV000924438 | 7                | 150948477             | 924438      | 910724      | rs140279503  | LOF        | 0.878    | 0.018        | 0.104    |
| KCNH2 | 547 | R   | H   | NM_000238.4(KCNH2):c.2660G>A (p.Arg887His)           | Long QT syndrome Long QT syndrome 2  Congenital long QT syndrome not specified not provided Arrhythmia | Conflicting interpretations of pathogenicity(Last reviewed: Jul 28, 2021) | criteria provided, conflicting interpretations       | VCV000067423 | 7                | 150948476             | 67423       | 78319       | rs199473432  | LOF        | 0.873    | 0.017        | 0.11     |
| KCNH2 | 549 | L   | V   | NM_000238.4(KCNH2):c.2665T>G (p.Leu889Val)           | Arrhythmia not provided Long QT syndrome                                                               | Conflicting interpretations of pathogenicity(Last reviewed: Jul 29, 2020) | criteria provided, conflicting interpretations       | VCV000200475 | 7                | 150948471             | 200475      | 197192      | rs765427343  | LOF        | 0.866    | 0.029        | 0.105    |
| KCNH2 | 550 | S   | P   | NM_000238.4(KCNH2):c.2668T>C (p.Ser890Pro)           | Arrhythmia                                                                                             | Uncertain significance(Last reviewed: Nov 1, 2019)                        | criteria provided, single submitter                  | VCV000926306 | 7                | 150948468             | 926306      | 910723      | rs1801006262 | LOF        | 0.926    | 0.012        | 0.062    |
| KCNH2 | 551 | F   | Y   | NM_000238.4(KCNH2):c.2672_2673delinsAT (p.Phe891Tyr) | Arrhythmia                                                                                             | Uncertain significance(Last reviewed: Mar 8, 2021)                        | criteria provided, single submitter                  | VCV001331999 | 7                | 150948463 - 150948464 | 1331999     | 1322719     | NA           | LOF        | 0.859    | 0.029        | 0.112    |
| KCNH2 | 552 | R   | C   | NM_000238.4(KCNH2):c.2674C>T (p.Arg892Cys)           | Cardiovascular phenotype Arrhythmia Long QT syndrome not specified not provided Long QT syndrome 2     | Conflicting interpretations of pathogenicity(Last reviewed: Nov 11, 2020) | criteria provided, conflicting interpretations       | VCV00191470  | 7                | 150948462             | 191470      | 189257      | rs201627778  | LOF        | 0.916    | 0.017        | 0.068    |
| KCNH2 | 552 | R   | H   | NM_000238.4(KCNH2):c.2675G>A (p.Arg892His)           | Arrhythmia not provided Long QT syndrome                                                               | Uncertain significance(Last reviewed: Jan 12, 2021)                       | criteria provided, multiple submitters, no conflicts | VCV001054268 | 7                | 150948461             | 1054268     | 1044805     | NA           | LOF        | 0.916    | 0.011        | 0.073    |
| KCNH2 | 553 | R   | K   | NM_000238.4(KCNH2):c.2678G>A (p.Arg893Lys)           | Long QT syndrome                                                                                       | Uncertain significance(Last reviewed: Last reviewed)                      | criteria provided, single submitter                  | VCV001025677 | 7                | 150948458             | 1025677     | 1007340     | rs1801005127 | LOF        | 0.91     | 0.012        | 0.078    |

| gene  | pos | aa1 | aa2 | Name                                       | Condition(s)                                                                                                                         | Clinical significance (Last reviewed)                                     | Review status                                        | Accession    | GRCh38Chromosome | GRCh38Location | VariationID | AlleleID(s) | dbSNP ID     | prediction | prob.LOF | prob.Neutral | prob.GOF |
|-------|-----|-----|-----|--------------------------------------------|--------------------------------------------------------------------------------------------------------------------------------------|---------------------------------------------------------------------------|------------------------------------------------------|--------------|------------------|----------------|-------------|-------------|--------------|------------|----------|--------------|----------|
|       |     |     |     |                                            |                                                                                                                                      | reviewed: Mar 2, 2020)                                                    | submitter                                            |              |                  |                |             |             |              |            |          |              |          |
| KCNH2 | 554 | R   | C   | NM_000238.4(KCNH2):c.2680C>T (p.Arg894Cys) | not provided Long QT syndrome Congenital long QT syndrome                                                                            | Uncertain significance(Last reviewed: Dec 13, 2019)                       | criteria provided, multiple submitters, no conflicts | VCV000067424 | 7                | 150948456      | 67424       | 78320       | rs199473433  | LOF        | 0.911    | 0.019        | 0.071    |
| KCNH2 | 554 | R   | H   | NM_000238.4(KCNH2):c.2681G>A (p.Arg894His) | Arrhythmia Long QT syndrome 2 Inborn genetic diseases                                                                                | Uncertain significance(Last reviewed: Oct 14, 2020)                       | criteria provided, multiple submitters, no conflicts | VCV000448972 | 7                | 150948455      | 448972      | 442550      | rs199473668  | LOF        | 0.913    | 0.012        | 0.076    |
| KCNH2 | 554 | R   | L   | NM_000238.4(KCNH2):c.2681G>T (p.Arg894Leu) | Congenital long QT syndrome                                                                                                          | not provided                                                              | no assertion provided                                | VCV000067425 | 7                | 150948455      | 67425       | 78321       | rs199473668  | LOF        | 0.888    | 0.023        | 0.089    |
| KCNH2 | 555 | T   | M   | NM_000238.4(KCNH2):c.2684C>T (p.Thr895Met) | Arrhythmia Long QT syndrome 2 Long QT syndrome not provided SUDDEN INFANT DEATH SYNDROME Long QT syndrome 1                          | Conflicting interpretations of pathogenicity(Last reviewed: May 17, 2020) | criteria provided, conflicting interpretations       | VCV000067426 | 7                | 150948452      | 67426       | 78322       | rs199473434  | LOF        | 0.879    | 0.019        | 0.103    |
| KCNH2 | 555 | T   | R   | NM_000238.4(KCNH2):c.2684C>G (p.Thr895Arg) | Arrhythmia                                                                                                                           | Uncertain significance(Last reviewed: Mar 3, 2021)                        | criteria provided, single submitter                  | VCV000919273 | 7                | 150948452      | 919273      | 910719      | rs199473434  | LOF        | 0.9      | 0.012        | 0.088    |
| KCNH2 | 557 | K   | M   | NM_000238.4(KCNH2):c.2690A>T (p.Lys897Met) | not provided Arrhythmia                                                                                                              | Uncertain significance(Last reviewed: Feb 25, 2019)                       | criteria provided, multiple submitters, no conflicts | VCV000200480 | 7                | 150948446      | 200480      | 197190      | rs1805123    | LOF        | 0.908    | 0.014        | 0.078    |
| KCNH2 | 557 | K   | T   | NM_000238.4(KCNH2):c.2690A>C (p.Lys897Thr) | Arrhythmia Atrial fibrillation Cardiovascular phenotype Long QT syndrome 2 not provided  Long QT syndrome not specified              | Benign(Last reviewed: Sep 1, 2021)                                        | criteria provided, multiple submitters, no conflicts | VCV000067427 | 7                | 150948446      | 67427       | 78323       | rs1805123    | LOF        | 0.915    | 0.013        | 0.072    |
| KCNH2 | 558 | A   | P   | NM_000238.4(KCNH2):c.1672G>C (p.Ala558Pro) | Long QT syndrome 2 Congenital long QT syndrome                                                                                       | Pathogenic(Last reviewed: Jul 1, 2008)                                    | no assertion criteria provided                       | VCV000014444 | 7                | 150951721      | 14444       | 29483       | rs121912516  | LOF        | 0.902    | 0.018        | 0.08     |
| KCNH2 | 559 | L   | P   | NM_000238.4(KCNH2):c.1676T>C (p.Leu559Pro) | Long QT syndrome                                                                                                                     | Uncertain significance(Last reviewed: Dec 28, 2018)                       | criteria provided, single submitter                  | VCV000656408 | 7                | 150951717      | 656408      | 635904      | rs199472920  | LOF        | 0.905    | 0.017        | 0.078    |
| KCNH2 | 559 | T   | K   | NM_000238.4(KCNH2):c.2696C>A (p.Thr899Lys) | Long QT syndrome                                                                                                                     | Uncertain significance(Last reviewed: Feb 12, 2020)                       | criteria provided, single submitter                  | VCV001006883 | 7                | 150947875      | 1006883     | 992190      | rs1480554629 | LOF        | 0.907    | 0.012        | 0.081    |
| KCNH2 | 559 | T   | M   | NM_000238.4(KCNH2):c.2696C>T (p.Thr899Met) | Arrhythmia Long QT syndrome                                                                                                          | Uncertain significance(Last reviewed: Dec 10, 2020)                       | criteria provided, multiple submitters, no conflicts | VCV000862133 | 7                | 150947875      | 862133      | 833330      | rs1480554629 | LOF        | 0.884    | 0.017        | 0.099    |
| KCNH2 | 559 | T   | R   | NM_000238.4(KCNH2):c.2696C>G (p.Thr899Arg) | Long QT syndrome Cardiovascular phenotype                                                                                            | Uncertain significance(Last reviewed: Jul 17, 2019)                       | criteria provided, multiple submitters, no conflicts | VCV000456916 | 7                | 150947875      | 456916      | 456478      | rs1480554629 | LOF        | 0.909    | 0.011        | 0.08     |
| KCNH2 | 559 | T   | S   | NM_000238.4(KCNH2):c.2695A>T (p.Thr899Ser) | Arrhythmia                                                                                                                           | Uncertain significance(Last reviewed: Feb 11, 2019)                       | criteria provided, single submitter                  | VCV000919954 | 7                | 150947876      | 919954      | 910718      | rs1800976319 | LOF        | 0.9      | 0.016        | 0.084    |
| KCNH2 | 561 | A   | V   | NM_000238.4(KCNH2):c.1682C>T (p.Ala561Val) | Long QT syndrome 2 not provided Long QT syndrome Cardiovascular phenotype Congenital long QT syndrome Prolonged QT interval  Obesity | Pathogenic/Likely pathogenic(Last reviewed: Dec 17, 2021)                 | criteria provided, multiple submitters, no conflicts | VCV000014420 | 7                | 150951711      | 14420       | 29459       | rs121912504  | LOF        | 0.881    | 0.02         | 0.099    |

| gene  | pos | aa1 | aa2 | Name                                       | Condition(s)                                                                                                                                    | Clinical significance (Last reviewed)                                     | Review status                                        | Accession    | GRCh38Chromosome | GRCh38Location | VariationID | AlleleID(s) | dbSNP ID     | prediction | prob.LOF | prob.Neutral | prob.GOF |
|-------|-----|-----|-----|--------------------------------------------|-------------------------------------------------------------------------------------------------------------------------------------------------|---------------------------------------------------------------------------|------------------------------------------------------|--------------|------------------|----------------|-------------|-------------|--------------|------------|----------|--------------|----------|
| KCNH2 | 563 | G   | R   | NM_000238.4(KCNH2):c.2707G>A (p.Gly903Arg) | Arrhythmia Cardiovascular phenotype  Congenital long QT syndrome not specified not provided Long QT syndrome                                    | Uncertain significance(Last reviewed: Feb 12, 2021)                       | criteria provided, multiple submitters, no conflicts | VCV000067428 | 7                | 150947864      | 67428       | 78324       | rs199473669  | LOF        | 0.917    | 0.012        | 0.071    |
| KCNH2 | 564 | E   | G   | NM_000238.4(KCNH2):c.2711A>G (p.Glu904Gly) | Long QT syndrome                                                                                                                                | Uncertain significance(Last reviewed: Nov 16, 2018)                       | criteria provided, single submitter                  | VCV000642118 | 7                | 150947860      | 642118      | 635893      | rs794727044  | LOF        | 0.911    | 0.02         | 0.07     |
| KCNH2 | 564 | E   | K   | NM_000238.4(KCNH2):c.2710G>A (p.Glu904Lys) | Arrhythmia                                                                                                                                      | Uncertain significance(Last reviewed: Jan 5, 2021)                        | criteria provided, single submitter                  | VCV001171262 | 7                | 150947861      | 1171262     | 1160690     | NA           | LOF        | 0.893    | 0.017        | 0.091    |
| KCNH2 | 564 | E   | V   | NM_000238.4(KCNH2):c.2711A>T (p.Glu904Val) | not provided                                                                                                                                    | Uncertain significance(Last reviewed: Feb 2, 2015)                        | criteria provided, single submitter                  | VCV000193977 | 7                | 150947860      | 193977      | 191140      | rs794727044  | LOF        | 0.887    | 0.026        | 0.086    |
| KCNH2 | 564 | L   | Q   | NM_000238.4(KCNH2):c.1691T>A (p.Leu564Gln) | Long QT syndrome                                                                                                                                | Likely pathogenic(Last reviewed: Jul 9, 2019)                             | criteria provided, single submitter                  | VCV000572344 | 7                | 150951702      | 572344      | 561404      | rs199472924  | LOF        | 0.887    | 0.02         | 0.093    |
| KCNH2 | 566 | S   | L   | NM_000238.4(KCNH2):c.2717C>T (p.Ser906Leu) | Long QT syndrome not specified Congenital long QT syndrome Long QT syndrome 2 Short QT syndrome 1 Arrhythmia not provided                       | Uncertain significance(Last reviewed: May 3, 2021)                        | criteria provided, multiple submitters, no conflicts | VCV000067429 | 7                | 150947854      | 67429       | 78325       | rs199473435  | LOF        | 0.897    | 0.016        | 0.088    |
| KCNH2 | 567 | A   | T   | NM_000238.4(KCNH2):c.2719G>A (p.Ala907Thr) | Long QT syndrome not provided                                                                                                                   | Uncertain significance(Last reviewed: May 8, 2019)                        | criteria provided, multiple submitters, no conflicts | VCV000200486 | 7                | 150947852      | 200486      | 197187      | rs752686806  | LOF        | 0.893    | 0.021        | 0.085    |
| KCNH2 | 570 | P   | L   | NM_000238.4(KCNH2):c.2729C>T (p.Pro910Leu) | Long QT syndrome not specified Cardiovascular phenotype not provided Arrhythmia                                                                 | Conflicting interpretations of pathogenicity(Last reviewed: Sep 13, 2021) | criteria provided, conflicting interpretations       | VCV000067430 | 7                | 150947842      | 67430       | 78326       | rs199473436  | LOF        | 0.913    | 0.016        | 0.071    |
| KCNH2 | 571 | G   | R   | NM_000238.4(KCNH2):c.2731G>C (p.Gly911Arg) | Arrhythmia                                                                                                                                      | Uncertain significance(Last reviewed: Mar 27, 2019)                       | criteria provided, single submitter                  | VCV000918838 | 7                | 150947840      | 918838      | 910714      | rs1800973294 | LOF        | 0.901    | 0.009        | 0.09     |
| KCNH2 | 572 | G   | R   | NM_000238.4(KCNH2):c.1714G>C (p.Gly572Arg) | Long QT syndrome 2 Congenital long QT syndrome                                                                                                  | Pathogenic(Last reviewed: Feb 1, 2000)                                    | no assertion criteria provided                       | VCV000014429 | 7                | 150951679      | 14429       | 29468       | rs9333649    | LOF        | 0.862    | 0.007        | 0.131    |
| KCNH2 | 572 | R   | Q   | NM_000238.4(KCNH2):c.2735G>A (p.Arg912Gln) | Long QT syndrome Arrhythmia                                                                                                                     | Uncertain significance(Last reviewed: Dec 4, 2020)                        | criteria provided, multiple submitters, no conflicts | VCV000527012 | 7                | 150947836      | 527012      | 522670      | rs958442820  | LOF        | 0.897    | 0.008        | 0.095    |
| KCNH2 | 572 | R   | W   | NM_000238.4(KCNH2):c.2734C>T (p.Arg912Trp) | Arrhythmia Long QT syndrome not provided                                                                                                        | Uncertain significance(Last reviewed: Oct 15, 2020)                       | criteria provided, multiple submitters, no conflicts | VCV000180384 | 7                | 150947837      | 180384      | 178573      | rs577847157  | LOF        | 0.908    | 0.011        | 0.081    |
| KCNH2 | 573 | A   | T   | NM_000238.4(KCNH2):c.2737G>A (p.Ala913Thr) | not provided                                                                                                                                    | Uncertain significance(Last reviewed: Oct 7, 2020)                        | criteria provided, single submitter                  | VCV001188698 | 7                | 150947834      | 1188698     | 1176883     | NA           | LOF        | 0.822    | 0.043        | 0.135    |
| KCNH2 | 573 | A   | V   | NM_000238.4(KCNH2):c.2738C>T (p.Ala913Val) | Long QT syndrome Cardiovascular phenotype  Long QT syndrome 2 Congenital long QT syndrome not provided Arrhythmia Long QT syndrome 2/9, digenic | Conflicting interpretations of pathogenicity(Last reviewed: Dec 1, 2021)  | criteria provided, conflicting interpretations       | VCV000014443 | 7                | 150947833      | 14443       | 29482       | rs77331749   | LOF        | 0.833    | 0.051        | 0.116    |
| KCNH2 | 575 | A   | V   | NM_000238.4(KCNH2):c.2744C>T               | not provided                                                                                                                                    | not provided                                                              | no assertion                                         | VCV000067431 | 7                | 150947827      | 67431       | 78327       | rs199473437  | LOF        | 0.823    | 0.063        | 0.114    |

| gene  | pos | aa1 | aa2 | Name                                       | Condition(s)                                                                                  | Clinical significance (Last reviewed)               | Review status                                        | Accession    | GRCh38Chromosome | GRCh38Location | VariationID | AlleleID(s) | dbSNP ID     | prediction | prob.LOF | prob.Neutral | prob.GOF |
|-------|-----|-----|-----|--------------------------------------------|-----------------------------------------------------------------------------------------------|-----------------------------------------------------|------------------------------------------------------|--------------|------------------|----------------|-------------|-------------|--------------|------------|----------|--------------|----------|
|       |     |     |     | (p.Ala915Val)                              |                                                                                               |                                                     | provided                                             |              |                  |                |             |             |              |            |          |              |          |
| KCNH2 | 577 | P   | L   | NM_000238.4(KCNH2):c.2750C>T (p.Pro917Leu) | Long QT syndrome Long QT syndrome 2 not specified not provided Arrhythmia                     | Uncertain significance(Last reviewed: Jul 29, 2021) | criteria provided, multiple submitters, no conflicts | VCV000067432 | 7                | 150947821      | 67432       | 78328       | rs76420733   | LOF        | 0.734    | 0.113        | 0.153    |
| KCNH2 | 577 | P   | Q   | NM_000238.4(KCNH2):c.1730C>A (p.Pro577Gln) | not provided                                                                                  | Uncertain significance(Last reviewed: Nov 1, 2019)  | criteria provided, single submitter                  | VCV000872354 | 7                | 150951663      | 872354      | 859593      | rs1801171859 | LOF        | 0.715    | 0.08         | 0.205    |
| KCNH2 | 578 | S   | N   | NM_000238.4(KCNH2):c.2753G>A (p.Ser918Asn) | Long QT syndrome                                                                              | Uncertain significance(Last reviewed: Jul 15, 2019) | criteria provided, single submitter                  | VCV000939122 | 7                | 150947818      | 939122      | 933765      | rs1268921735 | LOF        | 0.688    | 0.092        | 0.221    |
| KCNH2 | 580 | R   | G   | NM_000238.4(KCNH2):c.2758C>G (p.Arg920Gly) | not provided Arrhythmia Long QT syndrome                                                      | Uncertain significance(Last reviewed: Apr 13, 2021) | criteria provided, multiple submitters, no conflicts | VCV000200490 | 7                | 150947813      | 200490      | 197181      | rs199473438  | LOF        | 0.759    | 0.094        | 0.146    |
| KCNH2 | 580 | R   | Q   | NM_000238.4(KCNH2):c.2759G>A (p.Arg920Gln) | Long QT syndrome Arrhythmia Cardiovascular phenotype Congenital long QT syndrome not provided | Uncertain significance(Last reviewed: Dec 29, 2020) | criteria provided, multiple submitters, no conflicts | VCV000067434 | 7                | 150947812      | 67434       | 78330       | rs199473670  | LOF        | 0.715    | 0.089        | 0.195    |
| KCNH2 | 580 | R   | W   | NM_000238.4(KCNH2):c.2758C>T (p.Arg920Trp) | Long QT syndrome Arrhythmia Congenital long QT syndrome                                       | Uncertain significance(Last reviewed: Dec 23, 2019) | criteria provided, multiple submitters, no conflicts | VCV000067433 | 7                | 150947813      | 67433       | 78329       | rs199473438  | Neutral    | 0.696    | 0.15         | 0.154    |
| KCNH2 | 581 | S   | L   | NM_000238.4(KCNH2):c.1742C>T (p.Ser581Leu) | Arrhythmia Long QT syndrome                                                                   | Uncertain significance(Last reviewed: Dec 9, 2020)  | criteria provided, multiple submitters, no conflicts | VCV000577995 | 7                | 150951651      | 577995      | 561727      | rs794728483  | LOF        | 0.728    | 0.128        | 0.144    |
| KCNH2 | 582 | R   | C   | NM_000238.4(KCNH2):c.1744C>T (p.Arg582Cys) | Long QT syndrome 2 not provided Congenital long QT syndrome Long QT syndrome                  | Pathogenic(Last reviewed: Nov 10, 2020)             | criteria provided, multiple submitters, no conflicts | VCV000014428 | 7                | 150951649      | 14428       | 29467       | rs121912508  | Neutral    | 0.648    | 0.222        | 0.13     |
| KCNH2 | 582 | R   | H   | NM_000238.4(KCNH2):c.1745G>A (p.Arg582His) | Long QT syndrome Arrhythmia                                                                   | Uncertain significance(Last reviewed: Feb 19, 2021) | criteria provided, multiple submitters, no conflicts | VCV000926210 | 7                | 150951648      | 926210      | 910754      | rs199473426  | Neutral    | 0.697    | 0.163        | 0.139    |
| KCNH2 | 582 | R   | L   | NM_000238.4(KCNH2):c.2765G>T (p.Arg922Leu) | Arrhythmia                                                                                    | Uncertain significance(Last reviewed: Nov 4, 2019)  | criteria provided, single submitter                  | VCV000924058 | 7                | 150947806      | 924058      | 910711      | rs199473439  | Neutral    | 0.637    | 0.228        | 0.135    |
| KCNH2 | 582 | R   | Q   | NM_000238.4(KCNH2):c.2765G>A (p.Arg922Gln) | Long QT syndrome Arrhythmia Congenital long QT syndrome not provided                          | Uncertain significance(Last reviewed: Aug 26, 2020) | criteria provided, multiple submitters, no conflicts | VCV000067436 | 7                | 150947806      | 67436       | 78332       | rs199473439  | LOF        | 0.709    | 0.135        | 0.155    |
| KCNH2 | 582 | R   | W   | NM_000238.4(KCNH2):c.2764C>T (p.Arg922Trp) | Long QT syndrome Congenital long QT syndrome                                                  | Uncertain significance(Last reviewed: Mar 18, 2020) | criteria provided, single submitter                  | VCV000067435 | 7                | 150947807      | 67435       | 78331       | rs199473440  | Neutral    | 0.647    | 0.22         | 0.133    |
| KCNH2 | 583 | P   | L   | NM_000238.4(KCNH2):c.2768C>T (p.Pro923Leu) | Arrhythmia Long QT syndrome Long QT syndrome 2                                                | Uncertain significance(Last reviewed: Apr 5, 2021)  | criteria provided, multiple submitters, no conflicts | VCV000572278 | 7                | 150947803      | 572278      | 561705      | rs760408746  | LOF        | 0.837    | 0.067        | 0.096    |

| gene  | pos | aa1 | aa2 | Name                                                 | Condition(s)                                                                                                         | Clinical significance (Last reviewed)                                     | Review status                                        | Accession    | GRCh38Chromosome | GRCh38Location        | VariationID | AlleleID(s) | dbSNP ID    | prediction | prob.LOF | prob.Neutral | prob.GOF |
|-------|-----|-----|-----|------------------------------------------------------|----------------------------------------------------------------------------------------------------------------------|---------------------------------------------------------------------------|------------------------------------------------------|--------------|------------------|-----------------------|-------------|-------------|-------------|------------|----------|--------------|----------|
| KCNH2 | 583 | P   | Q   | NM_000238.4(KCNH2):c.2768C>A (p.Pro923Gln)           | Long QT syndrome                                                                                                     | Uncertain significance(Last reviewed: Mar 17, 2020)                       | criteria provided, single submitter                  | VCV001008348 | 7                | 150947803             | 1008348     | 992189      | rs760408746 | LOF        | 0.835    | 0.042        | 0.123    |
| KCNH2 | 584 | G   | A   | NM_000238.4(KCNH2):c.2771G>C (p.Gly924Ala)           | Long QT syndrome Arrhythmic(not specified)  Cardiovascular phenotype Short QT syndrome 1 Congenital long QT syndrome | Uncertain significance(Last reviewed: Feb 17, 2021)                       | criteria provided, multiple submitters, no conflicts | VCV000067438 | 7                | 150947800             | 67438       | 78334       | rs199473009 | LOF        | 0.856    | 0.025        | 0.119    |
| KCNH2 | 584 | G   | E   | NM_000238.4(KCNH2):c.2771G>A (p.Gly924Glu)           | Cardiovascular phenotype Congenital long QT syndrome not provided Long QT syndrome  Arrhythmic Long QT syndrome 2    | Conflicting interpretations of pathogenicity(Last reviewed: Sep 15, 2020) | criteria provided, conflicting interpretations       | VCV000067437 | 7                | 150947800             | 67437       | 78333       | rs199473009 | LOF        | 0.842    | 0.016        | 0.142    |
| KCNH2 | 584 | G   | R   | NM_000238.4(KCNH2):c.2770G>A (p.Gly924Arg)           | Long QT syndrome not provided                                                                                        | Uncertain significance(Last reviewed: Sep 26, 2018)                       | criteria provided, multiple submitters, no conflicts | VCV000200492 | 7                | 150947801             | 200492      | 197178      | rs794728397 | LOF        | 0.795    | 0.016        | 0.189    |
| KCNH2 | 584 | G   | W   | NM_000238.4(KCNH2):c.2770G>T (p.Gly924Trp)           | Long QT syndrome Arrhythmic Cardiovascular phenotype                                                                 | Uncertain significance(Last reviewed: Sep 17, 2019)                       | criteria provided, multiple submitters, no conflicts | VCV000519287 | 7                | 150947801             | 519287      | 509851      | rs794728397 | LOF        | 0.863    | 0.025        | 0.113    |
| KCNH2 | 585 | G   | A   | NM_000238.4(KCNH2):c.2774G>C (p.Gly925Ala)           | not provided                                                                                                         | Uncertain significance(Last reviewed: Aug 17, 2018)                       | criteria provided, single submitter                  | VCV000200495 | 7                | 150947797             | 200495      | 197177      | rs794728398 | LOF        | 0.92     | 0.013        | 0.067    |
| KCNH2 | 585 | G   | E   | NM_000238.4(KCNH2):c.2774G>A (p.Gly925Glu)           | Long QT syndrome Arrhythmia                                                                                          | Uncertain significance(Last reviewed: Jul 25, 2020)                       | criteria provided, multiple submitters, no conflicts | VCV000921867 | 7                | 150947797             | 921867      | 910709      | rs794728398 | LOF        | 0.92     | 0.008        | 0.072    |
| KCNH2 | 585 | G   | R   | NM_000238.4(KCNH2):c.2773G>A (p.Gly925Arg)           | not provided                                                                                                         | not provided                                                              | no assertion provided                                | VCV000067439 | 7                | 150947798             | 67439       | 78335       | rs199473010 | LOF        | 0.896    | 0.009        | 0.096    |
| KCNH2 | 585 | G   | V   | NM_000238.4(KCNH2):c.2774G>T (p.Gly925Val)           | Sudden unexplained death Long QT syndrome  not provided                                                              | Uncertain significance(Last reviewed: Jun 26, 2019)                       | criteria provided, multiple submitters, no conflicts | VCV000200497 | 7                | 150947797             | 200497      | 197176      | rs794728398 | LOF        | 0.914    | 0.014        | 0.072    |
| KCNH2 | 585 | G   | V   | NM_000238.4(KCNH2):c.2774G>T (p.Gly925Val)           | Sudden unexplained death Long QT syndrome  not provided                                                              | Uncertain significance(Last reviewed: Jun 26, 2019)                       | criteria provided, multiple submitters, no conflicts | VCV000200497 | 7                | 150947797             | 200497      | 197176      | rs794728398 | LOF        | 0.914    | 0.014        | 0.072    |
| KCNH2 | 585 | G   | V   | NM_000238.4(KCNH2):c.2774_2775delinsTT (p.Gly925Val) | Long QT syndrome                                                                                                     | Uncertain significance(Last reviewed: Apr 20, 2020)                       | criteria provided, single submitter                  | VCV001058588 | 7                | 150947796 - 150947797 | 1058588     | 1044804     | NA          | LOF        | 0.914    | 0.014        | 0.072    |
| KCNH2 | 585 | G   | V   | NM_000238.4(KCNH2):c.2774_2775delinsTT (p.Gly925Val) | Long QT syndrome                                                                                                     | Uncertain significance(Last reviewed: Apr 20, 2020)                       | criteria provided, single submitter                  | VCV001058588 | 7                | 150947796 - 150947797 | 1058588     | 1044804     | NA          | LOF        | 0.914    | 0.014        | 0.072    |
| KCNH2 | 585 | W   | C   | NM_000238.4(KCNH2):c.1755G>C (p.Trp585Cys)           | Long QT syndrome                                                                                                     | Likely pathogenic(Last reviewed: Mar 16, 2018)                            | criteria provided, single submitter                  | VCV000581669 | 7                | 150951638             | 581669      | 564156      | rs199473430 | LOF        | 0.918    | 0.022        | 0.06     |
| KCNH2 | 586 | P   | L   | NM_000238.4(KCNH2):c.2777C>T (p.Pro926Leu)           | Long QT syndrome                                                                                                     | Uncertain significance(Last reviewed: Dec 11, 2019)                       | criteria provided, single submitter                  | VCV000848808 | 7                | 150947794             | 848808      | 833327      | rs996063617 | LOF        | 0.914    | 0.017        | 0.069    |
| KCNH2 | 587 | W   | L   | NM_000238.4(KCNH2):c.2780G>T                         | Arrhythmic Long QT syndrome 2 not provided                                                                           | Uncertain                                                                 | criteria                                             | VCV000200501 | 7                | 150947791             | 200501      | 197172      | rs794728399 | LOF        | 0.882    | 0.038        | 0.079    |



| gene  | pos | aa1 | aa2 | Name                                       | Condition(s)                                                         | Clinical significance (Last reviewed)               | Review status                                        | Accession    | GRCh38Chromosome | GRCh38Location | VariationID | AlleleID(s) | dbSNP ID     | prediction | prob.LOF | prob.Neutral | prob.GOF |
|-------|-----|-----|-----|--------------------------------------------|----------------------------------------------------------------------|-----------------------------------------------------|------------------------------------------------------|--------------|------------------|----------------|-------------|-------------|--------------|------------|----------|--------------|----------|
|       |     |     |     | (p.Trp927Leu)                              | Long QT syndrome                                                     | significance(Last reviewed: Apr 15, 2021)           | provided, multiple submitters, no conflicts          |              |                  |                |             |             |              |            |          |              |          |
| KCNH2 | 588 | G   | E   | NM_000238.4(KCNH2):c.2783G>A (p.Gly928Glu) | Long QT syndrome                                                     | Uncertain significance(Last reviewed: Feb 7, 2020)  | criteria provided, single submitter                  | VCV000850359 | 7                | 150947788      | 850359      | 833326      | rs1339223823 | LOF        | 0.786    | 0.031        | 0.183    |
| KCNH2 | 588 | N   | K   | NM_000238.4(KCNH2):c.1764C>G (p.Asn588Lys) | Short QT syndrome 1 short QT syndrome                                | Pathogenic(Last reviewed: Apr 1, 2005)              | no assertion criteria provided                       | VCV000014436 | 7                | 150951629      | 14436       | 29475       | rs104894021  | GOF        | 0.706    | 0.038        | 0.256    |
| KCNH2 | 588 | N   | K   | NM_000238.4(KCNH2):c.1764C>G (p.Asn588Lys) | Short QT syndrome 1 short QT syndrome                                | Pathogenic(Last reviewed: Apr 1, 2005)              | no assertion criteria provided                       | VCV000014436 | 7                | 150951629      | 14436       | 29475       | rs104894021  | GOF        | 0.706    | 0.038        | 0.256    |
| KCNH2 | 588 | N   | K   | NM_000238.4(KCNH2):c.1764C>A (p.Asn588Lys) | Short QT syndrome 1 short QT syndrome                                | Pathogenic(Last reviewed: Jan 6, 2004)              | no assertion criteria provided                       | VCV000014437 | 7                | 150951629      | 14437       | 29476       | rs104894021  | GOF        | 0.706    | 0.038        | 0.256    |
| KCNH2 | 588 | N   | K   | NM_000238.4(KCNH2):c.1764C>A (p.Asn588Lys) | Short QT syndrome 1 short QT syndrome                                | Pathogenic(Last reviewed: Jan 6, 2004)              | no assertion criteria provided                       | VCV000014437 | 7                | 150951629      | 14437       | 29476       | rs104894021  | GOF        | 0.706    | 0.038        | 0.256    |
| KCNH2 | 589 | E   | Q   | NM_000238.4(KCNH2):c.2785G>C (p.Glu929Gln) | Arrhythmia                                                           | Uncertain significance(Last reviewed: Mar 11, 2020) | criteria provided, single submitter                  | VCV000926191 | 7                | 150947786      | 926191      | 910708      | rs1800967308 | LOF        | 0.851    | 0.027        | 0.122    |
| KCNH2 | 590 | S   | G   | NM_000238.4(KCNH2):c.2788A>G (p.Ser930Gly) | Arrhythmia                                                           | Uncertain significance(Last reviewed: Nov 4, 2019)  | criteria provided, single submitter                  | VCV000924230 | 7                | 150947783      | 924230      | 910707      | rs794728400  | LOF        | 0.86     | 0.035        | 0.105    |
| KCNH2 | 590 | S   | R   | NM_000238.4(KCNH2):c.2788A>C (p.Ser930Arg) | not provided                                                         | Uncertain significance(Last reviewed: May 14, 2014) | criteria provided, single submitter                  | VCV000200503 | 7                | 150947783      | 200503      | 197170      | rs794728400  | LOF        | 0.754    | 0.03         | 0.216    |
| KCNH2 | 591 | D   | N   | NM_000238.4(KCNH2):c.1771G>A (p.Asp591Asn) | Long QT syndrome Long QT syndrome 2  Arrhythmia                      | Uncertain significance(Last reviewed: Aug 27, 2020) | criteria provided, multiple submitters, no conflicts | VCV000911854 | 7                | 150951622      | 911854      | 897669      | rs376319070  | LOF        | 0.702    | 0.07         | 0.227    |
| KCNH2 | 592 | S   | P   | NM_000238.4(KCNH2):c.2794T>C (p.Ser932Pro) | Long QT syndrome                                                     | Uncertain significance(Last reviewed: Jun 13, 2019) | criteria provided, single submitter                  | VCV000942612 | 7                | 150947777      | 942612      | 933764      | rs1800966532 | LOF        | 0.762    | 0.079        | 0.159    |
| KCNH2 | 593 | I   | R   | NM_000238.4(KCNH2):c.1778T>G (p.Ile593Arg) | not provided Congenital long QT syndrome Long QT syndrome 2          | Pathogenic(Last reviewed: May 24, 2019)             | criteria provided, single submitter                  | VCV000014423 | 7                | 150951615      | 14423       | 29462       | rs28928904   | LOF        | 0.868    | 0.033        | 0.099    |
| KCNH2 | 597 | S   | N   | NM_000238.4(KCNH2):c.2810G>A (p.Ser937Asn) | Arrhythmia not provided Congenital long QT syndrome Long QT syndrome | Uncertain significance(Last reviewed: Dec 16, 2020) | criteria provided, multiple submitters, no conflicts | VCV000067440 | 7                | 150947761      | 67440       | 78336       | rs199473540  | LOF        | 0.753    | 0.104        | 0.142    |
| KCNH2 | 604 | E   | D   | NM_000238.4(KCNH2):c.2832G>T (p.Glu944Asp) | Long QT syndrome Arrhythmia                                          | Uncertain significance(Last reviewed: Apr 5, 2021)  | criteria provided, multiple submitters, no conflicts | VCV000526953 | 7                | 150947739      | 526953      | 522770      | rs1232364499 | LOF        | 0.833    | 0.067        | 0.1      |
| KCNH2 | 605 | G   | C   | NM_000238.4(KCNH2):c.2833G>T (p.Gly945Cys) | Long QT syndrome                                                     | Uncertain significance(Last reviewed: Jan 9, 2020)  | criteria provided, single submitter                  | VCV001063652 | 7                | 150947738      | 1063652     | 1044803     | NA           | LOF        | 0.793    | 0.084        | 0.124    |
| KCNH2 | 605 | P   | H   | NM_000238.4(KCNH2):c.1814C>A (p.Pro605His) | Long QT syndrome                                                     | Uncertain significance(Last reviewed: Feb 8,        | criteria provided, single submitter                  | VCV000858913 | 7                | 150951579      | 858913      | 833337      | rs199472938  | LOF        | 0.768    | 0.075        | 0.157    |

| gene  | pos | aa1 | aa2 | Name                                       | Condition(s)                                                                                          | Clinical significance (Last reviewed)                                      | Review status                                        | Accession    | GRCh38Chromosome | GRCh38Location | VariationID | AlleleID(s) | dbSNP ID     | prediction | prob.LOF | prob.Neutral | prob.GOF |
|-------|-----|-----|-----|--------------------------------------------|-------------------------------------------------------------------------------------------------------|----------------------------------------------------------------------------|------------------------------------------------------|--------------|------------------|----------------|-------------|-------------|--------------|------------|----------|--------------|----------|
|       |     |     |     |                                            |                                                                                                       | 2019)                                                                      |                                                      |              |                  |                |             |             |              |            |          |              |          |
| KCNH2 | 606 | P   | L   | NM_000238.4(KCNH2):c.2837C>T (p.Pro946Leu) | Long QT syndrome                                                                                      | Uncertain significance (Last reviewed: Oct 12, 2020)                       | criteria provided, single submitter                  | VCV001008413 | 7                | 150947734      | 1008413     | 992188      | rs1800964240 | LOF        | 0.799    | 0.083        | 0.118    |
| KCNH2 | 608 | R   | H   | NM_000238.4(KCNH2):c.2843G>A (p.Arg948His) | Congenital long QT syndrome Arrhythmialnot specified Long QT syndrome 2 Long QT syndrome not provided | Conflicting interpretations of pathogenicity (Last reviewed: Mar 18, 2021) | criteria provided, conflicting interpretations       | VCV000067443 | 7                | 150947728      | 67443       | 78339       | rs199473011  | LOF        | 0.861    | 0.035        | 0.105    |
| KCNH2 | 608 | R   | S   | NM_000238.4(KCNH2):c.2842C>A (p.Arg948Ser) | Congenital long QT syndrome                                                                           | not provided                                                               | no assertion provided                                | VCV000067442 | 7                | 150947729      | 67442       | 78338       | rs121912514  | LOF        | 0.864    | 0.037        | 0.1      |
| KCNH2 | 611 | Y   | H   | NM_000238.4(KCNH2):c.1831T>C (p.Tyr611His) | Long QT syndrome 2 Congenital long QT syndrome                                                        | Pathogenic (Last reviewed: May 13, 2005)                                   | no assertion criteria provided                       | VCV000029778 | 7                | 150951562      | 29778       | 38733       | rs199472942  | LOF        | 0.926    | 0.012        | 0.062    |
| KCNH2 | 612 | P   | R   | NM_000238.4(KCNH2):c.2855C>G (p.Pro952Arg) | Long QT syndrome                                                                                      | Uncertain significance (Last reviewed: Sep 9, 2020)                        | criteria provided, single submitter                  | VCV001036276 | 7                | 150947716      | 1036276     | 1027883     | rs765920319  | LOF        | 0.893    | 0.011        | 0.096    |
| KCNH2 | 613 | L   | F   | NM_000238.4(KCNH2):c.2857C>T (p.Leu953Phe) | Arrhythmia                                                                                            | Uncertain significance (Last reviewed: Dec 19, 2018)                       | criteria provided, single submitter                  | VCV000924479 | 7                | 150947714      | 924479      | 910701      | rs1800963184 | LOF        | 0.884    | 0.022        | 0.094    |
| KCNH2 | 614 | A   | V   | NM_000238.4(KCNH2):c.1841C>T (p.Ala614Val) | not provided Long QT syndrome 2 Congenital long QT syndrome Long QT syndrome                          | Pathogenic (Last reviewed: Jan 13, 2022)                                   | criteria provided, multiple submitters, no conflicts | VCV000029777 | 7                | 150951552      | 29777       | 38732       | rs199472944  | LOF        | 0.864    | 0.02         | 0.116    |
| KCNH2 | 614 | R   | C   | NM_000238.4(KCNH2):c.2860C>T (p.Arg954Cys) | not provided Cardiovascular phenotype  Arrhythmia SUDDEN INFANT DEATH SYNDROME Long QT syndrome       | Conflicting interpretations of pathogenicity (Last reviewed: Mar 3, 2021)  | criteria provided, conflicting interpretations       | VCV000067444 | 7                | 150947711      | 67444       | 78340       | rs141401803  | LOF        | 0.92     | 0.012        | 0.068    |
| KCNH2 | 614 | R   | H   | NM_000238.4(KCNH2):c.2861G>A (p.Arg954His) | Long QT syndrome Arrhythmia                                                                           | Uncertain significance (Last reviewed: Nov 24, 2019)                       | criteria provided, multiple submitters, no conflicts | VCV000456917 | 7                | 150947710      | 456917      | 457063      | rs772977598  | LOF        | 0.916    | 0.01         | 0.074    |
| KCNH2 | 615 | L   | V   | NM_000238.4(KCNH2):c.2863C>G (p.Leu955Val) | Long QT syndrome Arrhythmialnot provided  Congenital long QT syndrome                                 | Conflicting interpretations of pathogenicity (Last reviewed: Oct 6, 2020)  | criteria provided, conflicting interpretations       | VCV000067445 | 7                | 150947708      | 67445       | 78341       | rs199473012  | LOF        | 0.881    | 0.02         | 0.099    |
| KCNH2 | 617 | P   | L   | NM_000238.4(KCNH2):c.2870C>T (p.Pro957Leu) | Long QT syndrome 2                                                                                    | Uncertain significance                                                     | criteria provided, single submitter                  | VCV000979134 | 7                | 150947701      | 979134      | 967183      | rs1800962566 | LOF        | 0.896    | 0.013        | 0.09     |
| KCNH2 | 619 | S   | C   | NM_000238.4(KCNH2):c.2876C>G (p.Ser959Cys) | Long QT syndrome                                                                                      | Uncertain significance (Last reviewed: Nov 2, 2018)                        | criteria provided, single submitter                  | VCV000662474 | 7                | 150947695      | 662474      | 635890      | rs1584844763 | LOF        | 0.892    | 0.018        | 0.09     |
| KCNH2 | 620 | S   | N   | NM_000238.4(KCNH2):c.2879G>A (p.Ser960Asn) | Congenital long QT syndrome                                                                           | not provided                                                               | no assertion provided                                | VCV000067447 | 7                | 150947692      | 67447       | 78343       | rs199473013  | LOF        | 0.886    | 0.01         | 0.104    |
| KCNH2 | 623 | P   | T   | NM_000238.4(KCNH2):c.2887C>A (p.Pro963Thr) | Congenital long QT syndrome not provided  Arrhythmia                                                  | Uncertain significance (Last reviewed: Jan 13, 2020)                       | criteria provided, multiple submitters, no conflicts | VCV000067449 | 7                | 150947684      | 67449       | 78345       | rs199473014  | LOF        | 0.925    | 0.009        | 0.067    |
| KCNH2 | 624 | P   | A   | NM_000238.4(KCNH2):c.2890C>G (p.Pro964Ala) | Long QT syndrome Long QT syndrome 2                                                                   | Uncertain significance (Last reviewed: Jun 16, 2020)                       | criteria provided, multiple submitters, no           | VCV000359307 | 7                | 150947681      | 359307      | 310195      | rs886062087  | LOF        | 0.93     | 0.012        | 0.057    |

| gene  | pos | aa1 | aa2 | Name                                       | Condition(s)                                                                 | Clinical significance (Last reviewed)               | Review status                                        | Accession    | GRCh38Chromosome | GRCh38Location | VariationID | AlleleID(s) | dbSNP ID     | prediction | prob.LOF | prob.Neutral | prob.GOF |
|-------|-----|-----|-----|--------------------------------------------|------------------------------------------------------------------------------|-----------------------------------------------------|------------------------------------------------------|--------------|------------------|----------------|-------------|-------------|--------------|------------|----------|--------------|----------|
|       |     |     |     |                                            |                                                                              |                                                     | conflicts                                            |              |                  |                |             |             |              |            |          |              |          |
| KCNH2 | 624 | P   | L   | NM_000238.4(KCNH2):c.2891C>T (p.Pro964Leu) | Long QT syndrome                                                             | Uncertain significance(Last reviewed: Feb 18, 2020) | criteria provided, single submitter                  | VCV001046584 | 7                | 150947680      | 1046584     | 1027882     | rs886427965  | LOF        | 0.923    | 0.015        | 0.062    |
| KCNH2 | 624 | P   | R   | NM_000238.4(KCNH2):c.2891C>G (p.Pro964Arg) | Long QT syndrome                                                             | Uncertain significance(Last reviewed: Sep 20, 2020) | criteria provided, single submitter                  | VCV001021720 | 7                | 150947680      | 1021720     | 1007337     | rs886427965  | LOF        | 0.918    | 0.011        | 0.071    |
| KCNH2 | 624 | S   | C   | NM_000238.4(KCNH2):c.1870A>T (p.Ser624Cys) | Long QT syndrome                                                             | Uncertain significance(Last reviewed: Jul 19, 2019) | criteria provided, single submitter                  | VCV000644725 | 7                | 150951523      | 644725      | 635902      | rs1584853632 | LOF        | 0.921    | 0.014        | 0.065    |
| KCNH2 | 625 | G   | R   | NM_000238.4(KCNH2):c.2893G>A (p.Gly965Arg) | Long QT syndrome not provided Long QT syndrome 2                             | Uncertain significance(Last reviewed: Aug 6, 2020)  | criteria provided, multiple submitters, no conflicts | VCV000067450 | 7                | 150947678      | 67450       | 78346       | rs199473015  | LOF        | 0.915    | 0.014        | 0.071    |
| KCNH2 | 627 | P   | L   | NM_000238.4(KCNH2):c.2900C>T (p.Pro967Leu) | Long QT syndrome Cardiovascular phenotype not provided Arrhythmia            | Benign/Likely benign(Last reviewed: Nov 4, 2020)    | criteria provided, multiple submitters, no conflicts | VCV000067451 | 7                | 150947671      | 67451       | 78347       | rs199473016  | LOF        | 0.879    | 0.038        | 0.082    |
| KCNH2 | 628 | G   | S   | NM_000238.4(KCNH2):c.1882G>A (p.Gly628Ser) | Long QT syndrome Congenital long QT syndrome Long QT syndrome 2 not provided | Pathogenic(Last reviewed: May 12, 2020)             | criteria provided, multiple submitters, no conflicts | VCV000014427 | 7                | 150951511      | 14427       | 29466       | rs121912507  | LOF        | 0.906    | 0.017        | 0.077    |
| KCNH2 | 628 | P   | A   | NM_000238.4(KCNH2):c.2902C>G (p.Pro968Ala) | Arrhythmia not provided Long QT syndrome                                     | Uncertain significance(Last reviewed: Oct 3, 2020)  | criteria provided, multiple submitters, no conflicts | VCV000237298 | 7                | 150947669      | 237298      | 239994      | rs753788508  | LOF        | 0.92     | 0.019        | 0.061    |
| KCNH2 | 628 | P   | L   | NM_000238.4(KCNH2):c.2903C>T (p.Pro968Leu) | Arrhythmia Long QT syndrome 2 not provided                                   | Uncertain significance(Last reviewed: Dec 19, 2018) | criteria provided, multiple submitters, no conflicts | VCV000067452 | 7                | 150947668      | 67452       | 78348       | rs199473017  | LOF        | 0.912    | 0.022        | 0.065    |
| KCNH2 | 629 | G   | D   | NM_000238.4(KCNH2):c.2906G>A (p.Gly969Asp) | Arrhythmia                                                                   | Uncertain significance(Last reviewed: Jul 19, 2019) | criteria provided, single submitter                  | VCV000918705 | 7                | 150947665      | 918705      | 910697      | rs749873669  | LOF        | 0.891    | 0.017        | 0.092    |
| KCNH2 | 629 | G   | V   | NM_000238.4(KCNH2):c.2906G>T (p.Gly969Val) | Arrhythmia                                                                   | Uncertain significance(Last reviewed: Jan 27, 2020) | criteria provided, single submitter                  | VCV000926647 | 7                | 150947665      | 926647      | 910696      | rs749873669  | LOF        | 0.888    | 0.023        | 0.09     |
| KCNH2 | 630 | G   | R   | NM_000238.4(KCNH2):c.2908G>A (p.Gly970Arg) | Arrhythmia                                                                   | Uncertain significance(Last reviewed: Jan 17, 2020) | criteria provided, single submitter                  | VCV000926177 | 7                | 150947663      | 926177      | 910695      | rs1800959537 | LOF        | 0.821    | 0.021        | 0.158    |
| KCNH2 | 631 | E   | D   | NM_000238.4(KCNH2):c.2913G>T (p.Glu971Asp) | Arrhythmia                                                                   | Uncertain significance(Last reviewed: Aug 10, 2020) | criteria provided, single submitter                  | VCV000926285 | 7                | 150947658      | 926285      | 910694      | rs1347067242 | LOF        | 0.844    | 0.024        | 0.132    |
| KCNH2 | 631 | S   | F   | NM_000238.4(KCNH2):c.1892C>T (p.Ser631Phe) | not provided Long QT syndrome                                                | Uncertain significance(Last reviewed: Jul 24, 2019) | criteria provided, multiple submitters, no conflicts | VCV000456898 | 7                | 150951501      | 456898      | 456834      | rs1554425720 | LOF        | 0.85     | 0.049        | 0.101    |
| KCNH2 | 637 | C   | W   | NM_000238.4(KCNH2):c.2931C>G (p.Cys977Trp) | Arrhythmia                                                                   | Uncertain significance(Last reviewed: Jan 15,       | criteria provided, single submitter                  | VCV000919282 | 7                | 150947640      | 919282      | 910692      | rs761585108  | LOF        | 0.898    | 0.016        | 0.086    |

| gene  | pos | aa1 | aa2 | Name                                                 | Condition(s)                                                                                          | Clinical significance (Last reviewed)                                     | Review status                                        | Accession    | GRCh38Chromosome | GRCh38Location        | VariationID | AlleleID(s) | dbSNP ID     | prediction | prob.LOF | prob.Neutral | prob.GOF |
|-------|-----|-----|-----|------------------------------------------------------|-------------------------------------------------------------------------------------------------------|---------------------------------------------------------------------------|------------------------------------------------------|--------------|------------------|-----------------------|-------------|-------------|--------------|------------|----------|--------------|----------|
|       |     |     |     |                                                      |                                                                                                       |                                                                           |                                                      |              |                  |                       |             |             |              |            |          |              |          |
| KCNH2 | 638 | E   | K   | NM_000238.4(KCNH2):c.2932G>A (p.Glu978Lys)           | Long QT syndrome not specified not provided Arrhythmia                                                | Likely benign(Last reviewed: Nov 15, 2020)                                | criteria provided, multiple submitters, no conflicts | VCV000067453 | 7                | 150947639             | 67453       | 78349       | rs141117135  | LOF        | 0.847    | 0.013        | 0.14     |
| KCNH2 | 638 | E   | Q   | NM_000238.4(KCNH2):c.2932G>C (p.Glu978Gln)           | Long QT syndrome                                                                                      | Uncertain significance(Last reviewed: Sep 30, 2020)                       | criteria provided, single submitter                  | VCV001042802 | 7                | 150947639             | 1042802     | 1027881     | rs141117135  | LOF        | 0.864    | 0.014        | 0.122    |
| KCNH2 | 640 | F   | C   | NM_000238.4(KCNH2):c.1919T>G (p.Phe640Cys)           | Long QT syndrome                                                                                      | Uncertain significance(Last reviewed: Sep 20, 2020)                       | criteria provided, single submitter                  | VCV001045742 | 7                | 150951474             | 1045742     | 1027887     | rs1801154920 | LOF        | 0.913    | 0.019        | 0.068    |
| KCNH2 | 641 | S   | G   | NM_000238.4(KCNH2):c.2941A>G (p.Ser981Gly)           | Long QT syndrome Cardiovascular phenotype not specified not provided Arrhythmia                       | Conflicting interpretations of pathogenicity(Last reviewed: Feb 19, 2021) | criteria provided, conflicting interpretations       | VCV000067454 | 7                | 150947630             | 67454       | 78350       | rs76649554   | LOF        | 0.914    | 0.01         | 0.076    |
| KCNH2 | 642 | D   | N   | NM_000238.4(KCNH2):c.2944G>A (p.Asp982Asn)           | Arrhythmia Long QT syndrome 2 Long QT syndrome                                                        | Uncertain significance(Last reviewed: Apr 20, 2021)                       | criteria provided, multiple submitters, no conflicts | VCV000237299 | 7                | 150947627             | 237299      | 239993      | rs569452580  | LOF        | 0.923    | 0.011        | 0.066    |
| KCNH2 | 643 | T   | I   | NM_000238.4(KCNH2):c.2948C>T (p.Thr983Ile)           | Long QT syndrome not provided Congenital long QT syndrome not specified Long QT syndrome 2 Arrhythmia | Conflicting interpretations of pathogenicity(Last reviewed: Dec 17, 2021) | criteria provided, conflicting interpretations       | VCV000067455 | 7                | 150947623             | 67455       | 78351       | rs149955375  | LOF        | 0.861    | 0.025        | 0.114    |
| KCNH2 | 645 | N   | S   | NM_000238.4(KCNH2):c.2954A>G (p.Asn985Ser)           | not provided Long QT syndrome Arrhythmia                                                              | Uncertain significance(Last reviewed: Mar 16, 2019)                       | criteria provided, multiple submitters, no conflicts | VCV000067456 | 7                | 150947617             | 67456       | 78352       | rs199473541  | LOF        | 0.908    | 0.009        | 0.083    |
| KCNH2 | 646 | P   | T   | NM_000238.4(KCNH2):c.2956C>A (p.Pro986Thr)           | Arrhythmia Long QT syndrome                                                                           | Uncertain significance(Last reviewed: Nov 14, 2019)                       | criteria provided, multiple submitters, no conflicts | VCV000640120 | 7                | 150947615             | 640120      | 635888      | rs1261949255 | LOF        | 0.918    | 0.016        | 0.066    |
| KCNH2 | 650 | A   | T   | NM_000238.4(KCNH2):c.2968G>A (p.Ala990Thr)           | Arrhythmia Long QT syndrome                                                                           | Uncertain significance(Last reviewed: Nov 10, 2020)                       | criteria provided, multiple submitters, no conflicts | VCV000968306 | 7                | 150947512             | 968306      | 955092      | rs754362735  | LOF        | 0.874    | 0.023        | 0.103    |
| KCNH2 | 656 | N   | I   | NM_000238.4(KCNH2):c.2987A>T (p.Asn996Ile)           | Congenital long QT syndrome Long QT syndrome 2 not provided                                           | Pathogenic/Likely pathogenic(Last reviewed: Dec 13, 2021)                 | criteria provided, multiple submitters, no conflicts | VCV000067458 | 7                | 150947493             | 67458       | 78354       | rs199473018  | LOF        | 0.887    | 0.015        | 0.098    |
| KCNH2 | 657 | G   | C   | NM_000238.4(KCNH2):c.1968_1969delinsTT (p.Gly657Cys) | Long QT syndrome                                                                                      | Likely pathogenic(Last reviewed: Nov 6, 2019)                             | criteria provided, single submitter                  | VCV000943187 | 7                | 150951097 - 150951098 | 943187      | 933771      | rs1801136288 | LOF        | 0.931    | 0.01         | 0.059    |
| KCNH2 | 659 | S   | N   | NM_000238.4(KCNH2):c.2996G>A (p.Ser999Asn)           | Arrhythmia not provided                                                                               | Uncertain significance(Last reviewed: Dec 8, 2020)                        | criteria provided, multiple submitters, no conflicts | VCV000919130 | 7                | 150947484             | 919130      | 910688      | rs974699160  | LOF        | 0.902    | 0.012        | 0.086    |
| KCNH2 | 667 | R   | C   | NM_000238.4(KCNH2):c.3019C>T (p.Arg1007Cys)          | Arrhythmia                                                                                            | Uncertain significance(Last reviewed: Jan 9, 2020)                        | criteria provided, single submitter                  | VCV000918739 | 7                | 150947461             | 918739      | 910686      | rs1224504959 | LOF        | 0.824    | 0.088        | 0.089    |

| gene  | pos | aa1 | aa2 | Name                                        | Condition(s)                             | Clinical significance (Last reviewed)               | Review status                                        | Accession    | GRCh38Chromosome | GRCh38Location | VariationID | AlleleID(s) | dbSNP ID     | prediction | prob.LOF | prob.Neutral | prob.GOF |
|-------|-----|-----|-----|---------------------------------------------|------------------------------------------|-----------------------------------------------------|------------------------------------------------------|--------------|------------------|----------------|-------------|-------------|--------------|------------|----------|--------------|----------|
| KCNH2 | 671 | E   | G   | NM_000238.4(KCNH2):c.3032A>G (p.Glu1011Gly) | Long QT syndrome/Arrhythmia              | Uncertain significance(Last reviewed: Aug 11, 2020) | criteria provided, multiple submitters, no conflicts | VCV000922211 | 7                | 150947448      | 922211      | 910684      | rs1800945318 | LOF        | 0.882    | 0.028        | 0.09     |
| KCNH2 | 679 | R   | W   | NM_000238.4(KCNH2):c.2035C>T (p.Arg679Trp)  | Arrhythmia/Long QT syndrome              | Uncertain significance(Last reviewed: Aug 5, 2021)  | criteria provided, multiple submitters, no conflicts | VCV000581266 | 7                | 150951031      | 581266      | 566571      | rs79624542   | LOF        | 0.846    | 0.05         | 0.104    |
| KCNH2 | 681 | S   | G   | NM_000238.4(KCNH2):c.3061A>G (p.Ser1021Gly) | Long QT syndrome                         | Uncertain significance(Last reviewed: May 2, 2018)  | criteria provided, single submitter                  | VCV000572915 | 7                | 150947419      | 572915      | 566568      | rs1563146032 | LOF        | 0.876    | 0.049        | 0.075    |
| KCNH2 | 690 | P   | L   | NM_000238.4(KCNH2):c.3089C>T (p.Pro1030Leu) | Arrhythmia/Long QT syndrome/not provided | Uncertain significance(Last reviewed: Dec 21, 2021) | criteria provided, multiple submitters, no conflicts | VCV000847541 | 7                | 150947391      | 847541      | 833317      | rs904066540  | LOF        | 0.832    | 0.073        | 0.094    |
| KCNH2 | 690 | P   | R   | NM_000238.4(KCNH2):c.3089C>G (p.Pro1030Arg) | Long QT syndrome                         | Uncertain significance(Last reviewed: Feb 22, 2020) | criteria provided, single submitter                  | VCV000837323 | 7                | 150947391      | 837323      | 833318      | rs904066540  | LOF        | 0.789    | 0.041        | 0.17     |
| KCNH2 | 691 | G   | D   | NM_000238.4(KCNH2):c.3092G>A (p.Gly1031Asp) | Arrhythmia                               | Uncertain significance(Last reviewed: Nov 9, 2018)  | criteria provided, single submitter                  | VCV000919480 | 7                | 150947388      | 919480      | 910679      | rs1391531244 | LOF        | 0.847    | 0.032        | 0.121    |
| KCNH2 | 695 | R   | Q   | NM_000238.4(KCNH2):c.3104G>A (p.Arg1035Gln) | Long QT syndrome/Arrhythmia              | Uncertain significance(Last reviewed: Jun 7, 2021)  | criteria provided, multiple submitters, no conflicts | VCV000456922 | 7                | 150947376      | 456922      | 456466      | rs761933920  | LOF        | 0.852    | 0.056        | 0.092    |
| KCNH2 | 698 | E   | K   | NM_000238.4(KCNH2):c.2092G>A (p.Glu698Lys)  | not provided/Long QT syndrome            | Uncertain significance(Last reviewed: Mar 16, 2021) | criteria provided, multiple submitters, no conflicts | VCV000945957 | 7                | 150950974      | 945957      | 924754      | rs753966347  | LOF        | 0.831    | 0.026        | 0.143    |
| KCNH2 | 706 | Q   | H   | NM_000238.4(KCNH2):c.3138G>T (p.Gln1046His) | Arrhythmia                               | Uncertain significance(Last reviewed: Jan 27, 2020) | criteria provided, single submitter                  | VCV000926330 | 7                | 150947342      | 926330      | 910676      | rs1367829679 | LOF        | 0.86     | 0.032        | 0.108    |
| KCNH2 | 706 | Q   | R   | NM_000238.4(KCNH2):c.3137A>G (p.Gln1046Arg) | Long QT syndrome                         | Uncertain significance(Last reviewed: Aug 21, 2019) | criteria provided, single submitter                  | VCV000958659 | 7                | 150947343      | 958659      | 945517      | rs1800934521 | LOF        | 0.83     | 0.027        | 0.144    |
| KCNH2 | 710 | G   | S   | NM_000238.4(KCNH2):c.2128G>A (p.Gly710Ser)  | Long QT syndrome                         | Uncertain significance(Last reviewed: Jan 21, 2019) | criteria provided, single submitter                  | VCV000664978 | 7                | 150950938      | 664978      | 635899      | rs1584851956 | LOF        | 0.797    | 0.058        | 0.145    |
| KCNH2 | 714 | T   | I   | NM_000238.4(KCNH2):c.3161C>T (p.Thr1054Ile) | Long QT syndrome                         | Uncertain significance(Last reviewed: Nov 27, 2017) | criteria provided, single submitter                  | VCV000527001 | 7                | 150947046      | 527001      | 522442      | rs1554423904 | LOF        | 0.829    | 0.078        | 0.093    |
| KCNH2 | 715 | R   | W   | NM_000238.4(KCNH2):c.3163C>T (p.Arg1055Trp) | Long QT syndrome/Long QT syndrome 2      | Uncertain significance(Last reviewed: Jan 15, 2020) | criteria provided, multiple submitters, no conflicts | VCV000405340 | 7                | 150947044      | 405340      | 395666      | rs541259035  | LOF        | 0.852    | 0.052        | 0.095    |
| KCNH2 | 731 | M   | V   | NM_000238.4(KCNH2):c.3211A>G (p.Met1071Val) | Arrhythmia                               | Uncertain significance(Last reviewed: Oct 11, 2018) | criteria provided, single submitter                  | VCV000629473 | 7                | 150946996      | 629473      | 617337      | rs555797304  | LOF        | 0.88     | 0.035        | 0.084    |

| gene  | pos | aa1 | aa2 | Name                                                  | Condition(s)                                                                                                                | Clinical significance (Last reviewed)                                     | Review status                                        | Accession    | GRCh38Chromosome | GRCh38Location        | VariationID | AlleleID(s) | dbSNP ID     | prediction | prob.LOF | prob.Neutral | prob.GOF |
|-------|-----|-----|-----|-------------------------------------------------------|-----------------------------------------------------------------------------------------------------------------------------|---------------------------------------------------------------------------|------------------------------------------------------|--------------|------------------|-----------------------|-------------|-------------|--------------|------------|----------|--------------|----------|
| KCNH2 | 732 | T   | M   | NM_000238.4(KCNH2):c.3215C>T (p.Thr1072Met)           | not provided Long QT syndrome 2 Long QT syndrome Arrhythmia                                                                 | Uncertain significance(Last reviewed: Aug 25, 2020)                       | criteria provided, multiple submitters, no conflicts | VCV000359303 | 7                | 150946992             | 359303      | 305381      | rs781624566  | LOF        | 0.872    | 0.03         | 0.098    |
| KCNH2 | 752 | R   | Q   | NM_000238.4(KCNH2):c.2255G>A (p.Arg752Gln)            | Long QT syndrome Congenital long QT syndrome Long QT syndrome 2 not provided                                                | Likely pathogenic(Last reviewed: Jul 29, 2021)                            | criteria provided, multiple submitters, no conflicts | VCV000014435 | 7                | 150950311             | 14435       | 29474       | rs121912512  | LOF        | 0.871    | 0.031        | 0.098    |
| KCNH2 | 754 | L   | M   | NM_000238.4(KCNH2):c.3279_3280delinsAA (p.Leu1094Met) | Long QT syndrome                                                                                                            | Uncertain significance(Last reviewed: Nov 11, 2019)                       | criteria provided, single submitter                  | VCV000962100 | 7                | 150946927 - 150946928 | 962100      | 945515      | rs1800911944 | LOF        | 0.881    | 0.035        | 0.084    |
| KCNH2 | 761 | P   | S   | NM_000238.4(KCNH2):c.3301C>T (p.Pro1101Ser)           | Long QT syndrome Arrhythmia                                                                                                 | Uncertain significance(Last reviewed: Sep 10, 2018)                       | criteria provided, multiple submitters, no conflicts | VCV000456928 | 7                | 150946906             | 456928      | 456799      | rs1347039291 | LOF        | 0.857    | 0.071        | 0.072    |
| KCNH2 | 764 | P   | R   | NM_000238.4(KCNH2):c.2291C>G (p.Pro764Arg)            | Long QT syndrome                                                                                                            | Uncertain significance(Last reviewed: Sep 19, 2019)                       | criteria provided, single submitter                  | VCV000955346 | 7                | 150950275             | 955346      | 945521      | rs878853773  | LOF        | 0.704    | 0.07         | 0.226    |
| KCNH2 | 765 | L   | F   | NM_000238.4(KCNH2):c.3315G>C (p.Leu1105Phe)           | Arrhythmia                                                                                                                  | Uncertain significance(Last reviewed: Nov 20, 2018)                       | criteria provided, single submitter                  | VCV000926697 | 7                | 150946892             | 926697      | 910668      | rs1800909845 | LOF        | 0.837    | 0.071        | 0.091    |
| KCNH2 | 776 | A   | T   | NM_000238.4(KCNH2):c.3346G>A (p.Ala1116Thr)           | Arrhythmia                                                                                                                  | Uncertain significance(Last reviewed: Jan 14, 2020)                       | criteria provided, single submitter                  | VCV000918904 | 7                | 150945499             | 918904      | 910666      | rs1800858723 | LOF        | 0.863    | 0.051        | 0.086    |
| KCNH2 | 777 | C   | F   | NM_000238.4(KCNH2):c.3350G>T (p.Cys1117Phe)           | Long QT syndrome                                                                                                            | Uncertain significance(Last reviewed: Oct 29, 2018)                       | criteria provided, single submitter                  | VCV000582288 | 7                | 150945495             | 582288      | 564148      | rs730880119  | LOF        | 0.786    | 0.099        | 0.115    |
| KCNH2 | 784 | R   | W   | NM_000238.4(KCNH2):c.2350C>T (p.Arg784Trp)            | Long QT syndrome 2 Long QT syndrome 2, acquired, susceptibility to Brugada syndrome  Congenital long QT syndrome Arrhythmia | Conflicting interpretations of pathogenicity(Last reviewed: Feb 22, 2021) | criteria provided, conflicting interpretations       | VCV000014433 | 7                | 150950216             | 14433       | 29472       | rs12720441   | LOF        | 0.855    | 0.051        | 0.094    |
| KCNH2 | 793 | D   | N   | NM_000238.4(KCNH2):c.2377G>A (p.Asp793Asn)            | Arrhythmia                                                                                                                  | Uncertain significance(Last reviewed: Feb 19, 2020)                       | criteria provided, single submitter                  | VCV000921995 | 7                | 150950189             | 921995      | 910737      | rs781352799  | LOF        | 0.802    | 0.042        | 0.156    |
| KCNH2 | 795 | R   | C   | NM_000238.4(KCNH2):c.3403C>T (p.Arg1135Cys)           | not provided Arrhythmia                                                                                                     | Uncertain significance(Last reviewed: Oct 18, 2019)                       | criteria provided, multiple submitters, no conflicts | VCV000920427 | 7                | 150945442             | 920427      | 910661      | rs781369850  | LOF        | 0.872    | 0.051        | 0.078    |
| KCNH2 | 796 | V   | L   | NM_000238.4(KCNH2):c.2386G>T (p.Val796Leu)            | Long QT syndrome                                                                                                            | Uncertain significance(Last reviewed: Feb 22, 2020)                       | criteria provided, single submitter                  | VCV000940061 | 7                | 150950180             | 940061      | 933767      | rs143335921  | LOF        | 0.869    | 0.049        | 0.082    |
| KCNH2 | 797 | S   | Y   | NM_000238.4(KCNH2):c.3410C>A (p.Ser1137Tyr)           | Long QT syndrome                                                                                                            | Uncertain significance(Last reviewed: Jan 27, 2020)                       | criteria provided, single submitter                  | VCV000966027 | 7                | 150945435             | 966027      | 955090      | rs1413026629 | LOF        | 0.878    | 0.045        | 0.077    |
| KCNH2 | 800 | G   | A   | NM_000238.4(KCNH2):c.2398+1G>C                        | not provided Long QT syndrome 2                                                                                             | Pathogenic(Last reviewed: Jun 22, 2018)                                   | criteria provided, single submitter                  | VCV000200444 | 7                | 150950167             | 200444      | 197212      | rs794728391  | LOF        | 0.814    | 0.078        | 0.108    |
| KCNH2 | 800 | G   | V   | NM_000238.4(KCNH2):c.2398+1G>T                        | not provided Long QT syndrome                                                                                               | Pathogenic/Likely pathogenic(Last reviewed:)                              | criteria provided,                                   | VCV000372377 | 7                | 150950167             | 372377      | 359805      | rs794728391  | LOF        | 0.808    | 0.088        | 0.105    |

| gene  | pos | aa1 | aa2 | Name                                        | Condition(s)                                                                     | Clinical significance (Last reviewed)                                     | Review status                                        | Accession    | GRCh38Chromosome | GRCh38Location | VariationID | AlleleID(s) | dbSNP ID     | prediction | prob.LOF | prob.Neutral | prob.GOF |  |
|-------|-----|-----|-----|---------------------------------------------|----------------------------------------------------------------------------------|---------------------------------------------------------------------------|------------------------------------------------------|--------------|------------------|----------------|-------------|-------------|--------------|------------|----------|--------------|----------|--|
|       |     |     |     |                                             |                                                                                  |                                                                           | reviewed: Apr 28, 2017)                              |              |                  |                |             |             |              |            |          |              |          |  |
| KCNH2 | 801 | M   | I   | NM_000238.4(KCNH2):c.2398+5G>T              | Long QT syndrome                                                                 | Pathogenic/Likely pathogenic(Last reviewed: Jan 7, 2021)                  | multiple submitters, no conflicts                    | VCV000200446 | 7                | 150950163      | 200446      | 197211      | rs1554425149 | LOF        | 0.77     | 0.102        | 0.128    |  |
| KCNH2 | 801 | M   | T   | NM_000238.4(KCNH2):c.2398+4T>C              | not specifiedArrhythmia                                                          | Likely benign(Last reviewed: Mar 11, 2019)                                | criteria provided, multiple submitters, no conflicts | VCV000379294 | 7                | 150950164      | 379294      | 370976      | rs1057520559 | LOF        | 0.804    | 0.069        | 0.127    |  |
| KCNH2 | 801 | M   | V   | NM_000238.4(KCNH2):c.2398+3A>G              | Long QT syndrome                                                                 | Uncertain significance(Last reviewed: Jun 12, 2017)                       | criteria provided, single submitter                  | VCV000523701 | 7                | 150950165      | 523701      | 514350      | rs1554425151 | LOF        | 0.781    | 0.092        | 0.127    |  |
| KCNH2 | 805 | A   | V   | NM_000238.4(KCNH2):c.2398+16C>T             | not providednot specifiedArrhythmia                                              | Benign/Likely benign(Last reviewed: Apr 27, 2019)                         | criteria provided, multiple submitters, no conflicts | VCV000191543 | 7                | 150950152      | 191543      | 189260      | rs201873431  | LOF        | 0.869    | 0.051        | 0.08     |  |
| KCNH2 | 808 | G   | V   | NM_000238.4(KCNH2):c.2398+25G>T             | Arrhythmia not provided                                                          | Conflicting interpretations of pathogenicity(Last reviewed: Mar 16, 2021) | criteria provided, conflicting interpretations       | VCV000627667 | 7                | 150950143      | 627667      | 619249      | rs761167679  | LOF        | 0.818    | 0.102        | 0.081    |  |
| KCNH2 | 810 | L   | M   | NM_000238.4(KCNH2):c.3448C>A (p.Leu1150Met) | Arrhythmia not provided Long QT syndrome                                         | Uncertain significance(Last reviewed: Jul 29, 2020)                       | criteria provided, multiple submitters, no conflicts | VCV000456931 | 7                | 150945397      | 456931      | 456462      | rs754883792  | LOF        | 0.795    | 0.128        | 0.077    |  |
| KCNH2 | 811 | H   | Q   | NM_000238.4(KCNH2):c.3453C>A (p.His1151Gln) | Arrhythmia                                                                       | Uncertain significance(Last reviewed: Oct 11, 2018)                       | criteria provided, single submitter                  | VCV000629472 | 7                | 150945392      | 629472      | 617334      | rs531426751  | LOF        | 0.837    | 0.065        | 0.098    |  |
| KCNH2 | 815 | S   | L   | NM_000238.4(KCNH2):c.3464C>T (p.Ser1155Leu) | Long QT syndrome                                                                 | Uncertain significance(Last reviewed: Apr 16, 2018)                       | criteria provided, single submitter                  | VCV000580441 | 7                | 150945381      | 580441      | 566556      | rs867402580  | Neutral    | 0.519    | 0.302        | 0.179    |  |
| KCNH2 | 818 | G   | A   | NM_000238.4(KCNH2):c.3473G>C (p.Gly1158Ala) | Long QT syndrome                                                                 | Uncertain significance(Last reviewed: Oct 10, 2019)                       | criteria provided, single submitter                  | VCV000939464 | 7                | 150945372      | 939464      | 933762      | rs1800852263 | LOF        | 0.772    | 0.087        | 0.141    |  |
| KCNH2 | 818 | S   | L   | NM_000238.4(KCNH2):c.2453C>T (p.Ser818Leu)  | Long QT syndrome 2 Congenital long QT syndrome Long QT syndrome                  | Pathogenic/Likely pathogenic(Last reviewed: Sep 30, 2020)                 | criteria provided, multiple submitters, no conflicts | VCV000014432 | 7                | 150948995      | 14432       | 29471       | rs121912510  | LOF        | 0.747    | 0.129        | 0.123    |  |
| KCNH2 | 819 | A   | E   | NM_000238.4(KCNH2):c.2398+58C>A             | not specified                                                                    | Uncertain significance(Last reviewed: Aug 5, 2013)                        | criteria provided, single submitter                  | VCV000200233 | 7                | 150950110      | 200233      | 197209      | rs774109163  | LOF        | 0.745    | 0.091        | 0.164    |  |
| KCNH2 | 819 | A   | S   | NM_000238.4(KCNH2):c.2398+57G>T             | not provided                                                                     | Uncertain significance(Last reviewed: Jun 22, 2012)                       | criteria provided, single submitter                  | VCV000200448 | 7                | 150950111      | 200448      | 197210      | rs779355544  | LOF        | 0.729    | 0.129        | 0.142    |  |
| KCNH2 | 819 | A   | V   | NM_000238.4(KCNH2):c.2398+58C>T             | not specified                                                                    | Likely benign(Last reviewed: Sep 4, 2015)                                 | criteria provided, single submitter                  | VCV000200235 | 7                | 150950110      | 200235      | 197208      | rs774109163  | Neutral    | 0.712    | 0.173        | 0.114    |  |
| KCNH2 | 822 | V   | M   | NM_000238.4(KCNH2):c.2464G>A (p.Val822Met)  | Long QT syndrome Long QT syndrome 1  Cardiovascular phenotype Congenital long QT | Pathogenic(Last reviewed: Jul 23,                                         | criteria provided,                                   | VCV000014424 | 7                | 150948984      | 14424       | 29463       | rs121912506  | LOF        | 0.856    | 0.05         | 0.095    |  |

| gene  | pos | aa1 | aa2 | Name                                       | Condition(s)                                                        | Clinical significance (Last reviewed)                                    | Review status                                        | Accession    | GRCh38Chromosome | GRCh38Location | VariationID | AlleleID(s) | dbSNP ID     | prediction | prob.LOF | prob.Neutral | prob.GOF |
|-------|-----|-----|-----|--------------------------------------------|---------------------------------------------------------------------|--------------------------------------------------------------------------|------------------------------------------------------|--------------|------------------|----------------|-------------|-------------|--------------|------------|----------|--------------|----------|
|       |     |     |     |                                            | syndrome not provided Long QT syndrome 2                            | 2020)                                                                    | multiple submitters, no conflicts                    |              |                  |                |             |             |              |            |          |              |          |
| KCNH2 | 851 | S   | G   | NM_000238.4(KCNH2):c.2398+153A>G           | not provided                                                        | Uncertain significance(Last reviewed: Dec 19, 2016)                      | criteria provided, single submitter                  | VCV000200239 | 7                | 150950015      | 200239      | 197206      | rs794728345  | LOF        | 0.816    | 0.08         | 0.104    |
| KCNH2 | 851 | S   | R   | NM_000238.4(KCNH2):c.2398+155C>A           | Arrhythmia                                                          | Benign(Last reviewed: Apr 23, 2018)                                      | criteria provided, single submitter                  | VCV000630018 | 7                | 150950013      | 630018      | 619281      | rs536958259  | LOF        | 0.761    | 0.06         | 0.18     |
| KCNH2 | 852 | G   | R   | NM_000238.4(KCNH2):c.2398+156G>A           | Arrhythmia not provided                                             | Conflicting interpretations of pathogenicity(Last reviewed: Apr 6, 2021) | criteria provided, conflicting interpretations       | VCV000191471 | 7                | 150950012      | 191471      | 189259      | rs139247073  | LOF        | 0.865    | 0.02         | 0.114    |
| KCNH2 | 856 | L   | V   | NM_000238.4(KCNH2):c.2566C>G (p.Leu856Val) | Arrhythmia                                                          | Uncertain significance(Last reviewed: Oct 5, 2018)                       | criteria provided, single submitter                  | VCV000629380 | 7                | 150948882      | 629380      | 617346      | rs1563150352 | LOF        | 0.866    | 0.05         | 0.083    |
| KCNH2 | 859 | T   | M   | NM_000238.4(KCNH2):c.2398+178C>T           | Arrhythmia not provided                                             | Benign/Likely benign(Last reviewed: Oct 16, 2018)                        | criteria provided, multiple submitters, no conflicts | VCV000191542 | 7                | 150949990      | 191542      | 189258      | rs41314366   | LOF        | 0.843    | 0.076        | 0.081    |
| KCNH2 | 861 | N   | I   | NM_000238.4(KCNH2):c.2582A>T (p.Asn861Ile) | Congenital long QT syndrome Long QT syndrome 2/5 Long QT syndrome 2 | Pathogenic(Last reviewed: Apr 20, 2004)                                  | no assertion criteria provided                       | VCV000014440 | 7                | 150948866      | 14440       | 29479       | rs121912513  | Neutral    | 0.571    | 0.282        | 0.147    |
| KCNH2 | 865 | T   | I   | NM_000238.4(KCNH2):c.2594C>T (p.Thr865Ile) | Long QT syndrome                                                    | Uncertain significance(Last reviewed: Jul 6, 2019)                       | criteria provided, single submitter                  | VCV000957208 | 7                | 150948542      | 957208      | 945520      | rs768059097  | Neutral    | 0.303    | 0.551        | 0.146    |
| KCNH2 | 870 | H   | Y   | NM_000238.4(KCNH2):c.2398+210C>T           | Arrhythmia                                                          | Likely benign(Last reviewed: Jul 2, 2019)                                | criteria provided, single submitter                  | VCV000924676 | 7                | 150949958      | 924676      | 915419      | rs1264796799 | GOF        | 0.322    | 0.296        | 0.382    |
| KCNH2 | 871 | S   | C   | NM_000238.4(KCNH2):c.2612C>G (p.Ser871Cys) | Arrhythmia                                                          | Uncertain significance(Last reviewed: Nov 20, 2018)                      | criteria provided, single submitter                  | VCV000921315 | 7                | 150948524      | 921315      | 910728      | rs1177213407 | Neutral    | 0.347    | 0.392        | 0.261    |
| KCNH2 | 876 | E   | K   | NM_000238.4(KCNH2):c.2626G>A (p.Glu876Lys) | Long QT syndrome not provided                                       | Uncertain significance(Last reviewed: May 3, 2017)                       | criteria provided, single submitter                  | VCV000456914 | 7                | 150948510      | 456914      | 456490      | rs1554424688 | GOF        | 0.36     | 0.174        | 0.465    |
| KCNH2 | 878 | R   | C   | NM_000238.4(KCNH2):c.2398+234C>T           | Arrhythmia not specified                                            | Likely benign(Last reviewed: Apr 15, 2019)                               | criteria provided, multiple submitters, no conflicts | VCV000200243 | 7                | 150949934      | 200243      | 197204      | rs370393086  | Neutral    | 0.348    | 0.382        | 0.27     |
| KCNH2 | 881 | F   | I   | NM_000238.4(KCNH2):c.2641T>A (p.Phe881Ile) | Long QT syndrome                                                    | Uncertain significance(Last reviewed: Sep 12, 2020)                      | criteria provided, single submitter                  | VCV000855339 | 7                | 150948495      | 855339      | 833332      | rs1197425750 | Neutral    | 0.408    | 0.381        | 0.211    |
| KCNH2 | 883 | R   | W   | NM_000238.4(KCNH2):c.2647C>T (p.Arg883Trp) | Long QT syndrome not provided Arrhythmia                            | Uncertain significance(Last reviewed: Oct 5, 2020)                       | criteria provided, multiple submitters, no conflicts | VCV000925591 | 7                | 150948489      | 925591      | 910725      | rs201765446  | Neutral    | 0.303    | 0.439        | 0.258    |
| KCNH2 | 887 | R   | L   | NM_000238.4(KCNH2):c.2660G>T (p.Arg887Leu) | Arrhythmia                                                          | Uncertain significance(Last reviewed: Aug 8, 2019)                       | criteria provided, single submitter                  | VCV000628973 | 7                | 150948476      | 628973      | 617345      | rs199473432  | Neutral    | 0.288    | 0.47         | 0.242    |
| KCNH2 | 895 | T   | K   | NM_000238.4(KCNH2):c.2684C>A (p.Thr895Lys) | Arrhythmia                                                          | Uncertain significance(Last reviewed: Sep 12, 2020)                      | criteria provided, single submitter                  | VCV000927873 | 7                | 150948452      | 927873      | 910720      | rs199473434  | GOF        | 0.357    | 0.226        | 0.417    |



| gene  | pos | aa1 | aa2 | Name                                                  | Condition(s)                                                                                        | Clinical significance (Last reviewed)               | Review status                                        | Accession    | GRCh38Chromosome | GRCh38Location        | VariationID | AlleleID(s) | dbSNP ID     | prediction | prob.LOF | prob.Neutral | prob.GOF |
|-------|-----|-----|-----|-------------------------------------------------------|-----------------------------------------------------------------------------------------------------|-----------------------------------------------------|------------------------------------------------------|--------------|------------------|-----------------------|-------------|-------------|--------------|------------|----------|--------------|----------|
|       |     |     |     |                                                       |                                                                                                     | reviewed: Dec 23, 2020)                             | submitter                                            |              |                  |                       |             |             |              |            |          |              |          |
| KCNH2 | 901 | Q   | R   | NM_000238.4(KCNH2):c.2702A>G (p.Gln901Arg)            | Long QT syndrome                                                                                    | Uncertain significance(Last reviewed: Feb 13, 2019) | criteria provided, single submitter                  | VCV000851829 | 7                | 150947869             | 851829      | 833329      | rs1800975753 | GOF        | 0.376    | 0.173        | 0.451    |
| KCNH2 | 903 | G   | R   | NM_000238.4(KCNH2):c.2707G>C (p.Gly903Arg)            | Long QT syndrome                                                                                    | Uncertain significance(Last reviewed: Jul 11, 2019) | criteria provided, single submitter                  | VCV000960253 | 7                | 150947864             | 960253      | 945518      | rs199473669  | GOF        | 0.376    | 0.176        | 0.448    |
| KCNH2 | 907 | A   | S   | NM_000238.4(KCNH2):c.2719G>T (p.Ala907Ser)            | Long QT syndrome Arrhythmia                                                                         | Uncertain significance(Last reviewed: Jul 14, 2020) | criteria provided, multiple submitters, no conflicts | VCV000834753 | 7                | 150947852             | 834753      | 833328      | rs752686806  | GOF        | 0.401    | 0.234        | 0.365    |
| KCNH2 | 916 | G   | R   | NM_000238.4(KCNH2):c.2746G>A (p.Gly916Arg)            | Arrhythmia                                                                                          | Uncertain significance(Last reviewed: Jan 1, 2020)  | criteria provided, single submitter                  | VCV000924836 | 7                | 150947825             | 924836      | 910713      | rs1800972199 | GOF        | 0.386    | 0.177        | 0.436    |
| KCNH2 | 924 | G   | A   | NM_000238.4(KCNH2):c.2769_2771delinsAGC (p.Gly924Ala) | Arrhythmia                                                                                          | Uncertain significance(Last reviewed: Dec 18, 2019) | criteria provided, single submitter                  | VCV000920801 | 7                | 150947800 - 150947802 | 920801      | 910710      | rs1800969882 | GOF        | 0.347    | 0.188        | 0.465    |
| KCNH2 | 927 | W   | C   | NM_000238.4(KCNH2):c.2781G>T (p.Trp927Cys)            | not provided Long QT syndrome                                                                       | Uncertain significance(Last reviewed: Mar 17, 2020) | criteria provided, multiple submitters, no conflicts | VCV001037100 | 7                | 150947790             | 1037100     | 1027885     | rs866768546  | Neutral    | 0.557    | 0.307        | 0.136    |
| KCNH2 | 931 | P   | L   | NM_000238.4(KCNH2):c.2792C>T (p.Pro931Leu)            | Long QT syndrome Arrhythmia                                                                         | Uncertain significance(Last reviewed: Jan 5, 2021)  | criteria provided, multiple submitters, no conflicts | VCV000654837 | 7                | 150947779             | 654837      | 635891      | rs749759697  | Neutral    | 0.399    | 0.365        | 0.236    |
| KCNH2 | 931 | P   | R   | NM_000238.4(KCNH2):c.2792C>G (p.Pro931Arg)            | Arrhythmia                                                                                          | Uncertain significance(Last reviewed: Oct 9, 2019)  | criteria provided, single submitter                  | VCV000928265 | 7                | 150947779             | 928265      | 910706      | rs749759697  | GOF        | 0.426    | 0.249        | 0.325    |
| KCNH2 | 932 | S   | F   | NM_000238.4(KCNH2):c.2795C>T (p.Ser932Phe)            | Arrhythmia                                                                                          | Uncertain significance(Last reviewed: Sep 10, 2019) | criteria provided, single submitter                  | VCV000925842 | 7                | 150947776             | 925842      | 910705      | rs1800966447 | Neutral    | 0.407    | 0.313        | 0.28     |
| KCNH2 | 935 | P   | A   | NM_000238.4(KCNH2):c.2803C>G (p.Pro935Ala)            | Arrhythmia                                                                                          | Uncertain significance(Last reviewed: May 23, 2019) | criteria provided, single submitter                  | VCV000922520 | 7                | 150947768             | 922520      | 910704      | rs1419849010 | GOF        | 0.377    | 0.233        | 0.389    |
| KCNH2 | 940 | S   | I   | NM_000238.4(KCNH2):c.2819G>T (p.Ser940Ile)            | Arrhythmia                                                                                          | Uncertain significance(Last reviewed: Oct 18, 2019) | criteria provided, single submitter                  | VCV000923239 | 7                | 150947752             | 923239      | 910703      | rs1800965243 | Neutral    | 0.366    | 0.337        | 0.296    |
| KCNH2 | 944 | E   | D   | NM_000238.4(KCNH2):c.2832G>C (p.Glu944Asp)            | Arrhythmia                                                                                          | Uncertain significance(Last reviewed: Jul 22, 2018) | criteria provided, single submitter                  | VCV000628923 | 7                | 150947739             | 628923      | 617342      | rs1232364499 | GOF        | 0.433    | 0.221        | 0.347    |
| KCNH2 | 948 | R   | C   | NM_000238.4(KCNH2):c.2842C>T (p.Arg948Cys)            | Long QT syndrome Long QT syndrome 1/2, digenic Congenital long QT syndrome  Arrhythmia not provided | Uncertain significance(Last reviewed: Dec 9, 2021)  | criteria provided, multiple submitters, no conflicts | VCV000014441 | 7                | 150947729             | 14441       | 29480       | rs121912514  | Neutral    | 0.447    | 0.342        | 0.211    |
| KCNH2 | 951 | S   | R   | NM_000238.4(KCNH2):c.2853C>A (p.Ser951Arg)            | Long QT syndrome                                                                                    | Uncertain significance(Last reviewed: May 9, 2019)  | criteria provided, single submitter                  | VCV000840645 | 7                | 150947718             | 840645      | 833325      | rs1443792370 | GOF        | 0.357    | 0.176        | 0.467    |

| gene  | pos  | aa1 | aa2 | Name                                        | Condition(s)                                            | Clinical significance (Last reviewed)               | Review status                                        | Accession     | GRCh38Chromosome | GRCh38Location | VariationID | AlleleID(s) | dbSNP ID     | prediction | prob.LOF | prob.Neutral | prob.GOF |
|-------|------|-----|-----|---------------------------------------------|---------------------------------------------------------|-----------------------------------------------------|------------------------------------------------------|---------------|------------------|----------------|-------------|-------------|--------------|------------|----------|--------------|----------|
| KCNH2 | 952  | P   | L   | NM_000238.4(KCNH2):c.2855C>T (p.Pro952Leu)  | Long QT syndrome                                        | Uncertain significance(Last reviewed: Feb 24, 2019) | criteria provided, single submitter                  | VCV0000862901 | 7                | 150947716      | 862901      | 833324      | rs765920319  | Neutral    | 0.39     | 0.344        | 0.266    |
| KCNH2 | 952  | P   | S   | NM_000238.4(KCNH2):c.2854C>T (p.Pro952Ser)  | Arrhythmialnot provided Long QT syndrome                | Uncertain significance(Last reviewed: Dec 9, 2020)  | criteria provided, multiple submitters, no conflicts | VCV000919402  | 7                | 150947717      | 919402      | 910702      | rs753735368  | GOF        | 0.392    | 0.218        | 0.39     |
| KCNH2 | 959  | S   | F   | NM_000238.4(KCNH2):c.2876C>T (p.Ser959Phe)  | Long QT syndrome                                        | Uncertain significance(Last reviewed: Sep 14, 2018) | criteria provided, single submitter                  | VCV000657772  | 7                | 150947695      | 657772      | 635889      | rs1584844763 | Neutral    | 0.383    | 0.343        | 0.274    |
| KCNH2 | 959  | S   | T   | NM_000238.4(KCNH2):c.2875T>A (p.Ser959Thr)  | Arrhythmia                                              | Uncertain significance(Last reviewed: Nov 16, 2018) | criteria provided, single submitter                  | VCV000921152  | 7                | 150947696      | 921152      | 910700      | rs1800962302 | GOF        | 0.382    | 0.191        | 0.427    |
| KCNH2 | 967  | P   | S   | NM_000238.4(KCNH2):c.2899C>T (p.Pro967Ser)  | Long QT syndrome Arrhythmia                             | Uncertain significance(Last reviewed: Oct 22, 2019) | criteria provided, multiple submitters, no conflicts | VCV000923330  | 7                | 150947672      | 923330      | 910698      | rs1057450060 | GOF        | 0.389    | 0.188        | 0.423    |
| KCNH2 | 976  | D   | N   | NM_000238.4(KCNH2):c.2926G>A (p.Asp976Asn)  | Long QT syndrome Arrhythmia                             | Uncertain significance(Last reviewed: Sep 11, 2019) | criteria provided, multiple submitters, no conflicts | VCV000928384  | 7                | 150947645      | 928384      | 910693      | rs1800958394 | GOF        | 0.412    | 0.179        | 0.409    |
| KCNH2 | 977  | C   | F   | NM_000238.4(KCNH2):c.2930G>T (p.Cys977Phe)  | Long QT syndrome                                        | Uncertain significance(Last reviewed: Sep 7, 2016)  | criteria provided, single submitter                  | VCV000405354  | 7                | 150947641      | 405354      | 395682      | rs767252448  | Neutral    | 0.51     | 0.326        | 0.164    |
| KCNH2 | 988  | S   | A   | NM_000238.4(KCNH2):c.2962T>G (p.Ser988Ala)  | Long QT syndrome                                        | Uncertain significance(Last reviewed: Jul 13, 2020) | criteria provided, single submitter                  | VCV000859417  | 7                | 150947609      | 859417      | 833322      | rs747237810  | GOF        | 0.363    | 0.288        | 0.348    |
| KCNH2 | 1001 | W   | C   | NM_000238.4(KCNH2):c.3003G>C (p.Trp1001Cys) | Long QT syndrome                                        | Uncertain significance(Last reviewed: Dec 27, 2019) | criteria provided, single submitter                  | VCV000857986  | 7                | 150947477      | 857986      | 833321      | rs121912509  | Neutral    | 0.474    | 0.377        | 0.15     |
| KCNH2 | 1003 | D   | N   | NM_000238.4(KCNH2):c.3007G>A (p.Asp1003Asn) | not specified Long QT syndrome                          | Uncertain significance(Last reviewed: Mar 11, 2020) | criteria provided, multiple submitters, no conflicts | VCV000373622  | 7                | 150947473      | 373622      | 359804      | rs794728402  | GOF        | 0.376    | 0.175        | 0.449    |
| KCNH2 | 1003 | D   | Y   | NM_000238.4(KCNH2):c.3007G>T (p.Asp1003Tyr) | not provided                                            | Likely pathogenic(Last reviewed: Jul 16, 2014)      | criteria provided, single submitter                  | VCV000200516  | 7                | 150947473      | 200516      | 197155      | rs794728402  | GOF        | 0.312    | 0.3          | 0.388    |
| KCNH2 | 1005 | R   | Q   | NM_000238.4(KCNH2):c.3014G>A (p.Arg1005Gln) | Congenital long QT syndrome Arrhythmia                  | Uncertain significance(Last reviewed: Dec 6, 2019)  | criteria provided, single submitter                  | VCV000067461  | 7                | 150947466      | 67461       | 78357       | rs199473019  | GOF        | 0.369    | 0.218        | 0.413    |
| KCNH2 | 1005 | R   | W   | NM_000238.4(KCNH2):c.3013C>T (p.Arg1005Trp) | Long QT syndrome                                        | Uncertain significance(Last reviewed: Oct 13, 2020) | criteria provided, single submitter                  | VCV001019746  | 7                | 150947467      | 1019746     | 1007336     | rs1016101226 | Neutral    | 0.323    | 0.43         | 0.247    |
| KCNH2 | 1007 | R   | H   | NM_000238.4(KCNH2):c.3020G>A (p.Arg1007His) | Long QT syndrome ArrhythmialCongenital long QT syndrome | Uncertain significance(Last reviewed: Apr 20, 2021) | criteria provided, multiple submitters, no conflicts | VCV000067463  | 7                | 150947460      | 67463       | 78359       | rs199473542  | GOF        | 0.355    | 0.283        | 0.361    |
| KCNH2 | 1014 | R   | Q   | NM_000238.4(KCNH2):c.3041G>A                | Arrhythmialnot provided Long QT syndrome                | Uncertain                                           | criteria                                             | VCV000922413  | 7                | 150947439      | 922413      | 910683      | rs932335536  | GOF        | 0.389    | 0.217        | 0.393    |

| gene  | pos  | aa1 | aa2 | Name                                        | Condition(s)                                                                            | Clinical significance (Last reviewed)                                    | Review status                                        | Accession    | GRCh38Chromosome | GRCh38Location | VariationID | AlleleID(s) | dbSNP ID     | prediction | prob.LOF | prob.Neutral | prob.GOF |
|-------|------|-----|-----|---------------------------------------------|-----------------------------------------------------------------------------------------|--------------------------------------------------------------------------|------------------------------------------------------|--------------|------------------|----------------|-------------|-------------|--------------|------------|----------|--------------|----------|
|       |      |     |     | (p.Arg1014Gln)                              |                                                                                         | significance(Last reviewed: Apr 8, 2020)                                 | provided, multiple submitters, no conflicts          |              |                  |                |             |             |              |            |          |              |          |
| KCNH2 | 1017 | A   | S   | NM_000238.4(KCNH2):c.3049G>T (p.Ala1017Ser) | Arrhythmic not provided Long QT syndrome                                                | Uncertain significance(Last reviewed: Dec 8, 2021)                       | criteria provided, multiple submitters, no conflicts | VCV000565852 | 7                | 150947431      | 565852      | 561689      | rs950543448  | GOF        | 0.378    | 0.194        | 0.427    |
| KCNH2 | 1018 | P   | A   | NM_000238.4(KCNH2):c.3052C>G (p.Pro1018Ala) | Arrhythmic not provided Long QT syndrome                                                | Uncertain significance(Last reviewed: Feb 17, 2021)                      | criteria provided, multiple submitters, no conflicts | VCV000200520 | 7                | 150947428      | 200520      | 197152      | rs41313764   | GOF        | 0.346    | 0.244        | 0.41     |
| KCNH2 | 1018 | P   | L   | NM_000238.4(KCNH2):c.3053C>T (p.Pro1018Leu) | Long QT syndrome                                                                        | Uncertain significance(Last reviewed: Sep 17, 2018)                      | criteria provided, single submitter                  | VCV000651422 | 7                | 150947427      | 651422      | 635887      | rs866657878  | Neutral    | 0.327    | 0.332        | 0.341    |
| KCNH2 | 1020 | P   | S   | NM_000238.4(KCNH2):c.3058C>T (p.Pro1020Ser) | Long QT syndrome                                                                        | Uncertain significance(Last reviewed: Jun 14, 2016)                      | criteria provided, single submitter                  | VCV000359306 | 7                | 150947422      | 359306      | 302189      | rs41307274   | GOF        | 0.35     | 0.214        | 0.436    |
| KCNH2 | 1022 | L   | P   | NM_000238.4(KCNH2):c.3065T>C (p.Leu1022Pro) | Arrhythmia                                                                              | Uncertain significance(Last reviewed: Mar 9, 2021)                       | criteria provided, single submitter                  | VCV001332320 | 7                | 150947415      | 1332320     | 1323039     | NA           | Neutral    | 0.531    | 0.274        | 0.195    |
| KCNH2 | 1024 | N   | Y   | NM_000238.4(KCNH2):c.3070A>T (p.Asn1024Tyr) | Long QT syndrome                                                                        | Uncertain significance(Last reviewed: Sep 24, 2020)                      | criteria provided, single submitter                  | VCV001022039 | 7                | 150947410      | 1022039     | 1007335     | rs1800941962 | GOF        | 0.304    | 0.282        | 0.415    |
| KCNH2 | 1027 | L   | I   | NM_000238.4(KCNH2):c.3079C>A (p.Leu1027Ile) | Arrhythmia Cardiac arrhythmia                                                           | Conflicting interpretations of pathogenicity(Last reviewed: Oct 8, 2020) | criteria provided, conflicting interpretations       | VCV000200254 | 7                | 150947401      | 200254      | 197150      | rs794728346  | Neutral    | 0.498    | 0.326        | 0.176    |
| KCNH2 | 1032 | R   | P   | NM_000238.4(KCNH2):c.3095G>C (p.Arg1032Pro) | Arrhythmia                                                                              | Uncertain significance(Last reviewed: Nov 2, 2020)                       | criteria provided, single submitter                  | VCV001171150 | 7                | 150947385      | 1171150     | 1160689     | NA           | GOF        | 0.361    | 0.275        | 0.364    |
| KCNH2 | 1032 | R   | Q   | NM_000238.4(KCNH2):c.3095G>A (p.Arg1032Gln) | Long QT syndrome Arrhythmia Congenital long QT syndrome not provided Long QT syndrome 2 | Uncertain significance(Last reviewed: Nov 1, 2020)                       | criteria provided, multiple submitters, no conflicts | VCV000067466 | 7                | 150947385      | 67466       | 78362       | rs199473020  | GOF        | 0.365    | 0.221        | 0.414    |
| KCNH2 | 1032 | R   | W   | NM_000238.4(KCNH2):c.3094C>T (p.Arg1032Trp) | Arrhythmia not provided Long QT syndrome  Long QT syndrome 2                            | Uncertain significance(Last reviewed: Feb 1, 2021)                       | criteria provided, multiple submitters, no conflicts | VCV000200522 | 7                | 150947386      | 200522      | 197149      | rs373394254  | Neutral    | 0.312    | 0.443        | 0.246    |
| KCNH2 | 1033 | R   | L   | NM_000238.4(KCNH2):c.3098G>T (p.Arg1033Leu) | Long QT syndrome                                                                        | Uncertain significance(Last reviewed: Aug 2, 2020)                       | criteria provided, single submitter                  | VCV001059933 | 7                | 150947382      | 1059933     | 1044802     | NA           | Neutral    | 0.319    | 0.377        | 0.303    |
| KCNH2 | 1033 | R   | Q   | NM_000238.4(KCNH2):c.3098G>A (p.Arg1033Gln) | Long QT syndrome Arrhythmia                                                             | Uncertain significance(Last reviewed: Apr 19, 2021)                      | criteria provided, multiple submitters, no conflicts | VCV000456920 | 7                | 150947382      | 456920      | 456807      | rs750858069  | GOF        | 0.369    | 0.219        | 0.411    |
| KCNH2 | 1033 | R   | W   | NM_000238.4(KCNH2):c.3097C>T (p.Arg1033Trp) | Congenital long QT syndrome Arrhythmic not provided Long QT syndrome Long QT syndrome 1 | Uncertain significance(Last reviewed: Jul 27, 2021)                      | criteria provided, multiple submitters, no           | VCV000067467 | 7                | 150947383      | 67467       | 78363       | rs199473021  | Neutral    | 0.317    | 0.437        | 0.247    |

| gene  | pos  | aa1 | aa2 | Name                                        | Condition(s)                                                                                                                            | Clinical significance (Last reviewed)                                     | Review status                                        | Accession    | GRCh38Chromosome | GRCh38Location | VariationID | AlleleID(s) | dbSNP ID     | prediction | prob.LOF | prob.Neutral | prob.GOF |
|-------|------|-----|-----|---------------------------------------------|-----------------------------------------------------------------------------------------------------------------------------------------|---------------------------------------------------------------------------|------------------------------------------------------|--------------|------------------|----------------|-------------|-------------|--------------|------------|----------|--------------|----------|
|       |      |     |     |                                             |                                                                                                                                         |                                                                           | conflicts                                            |              |                  |                |             |             |              |            |          |              |          |
| KCNH2 | 1035 | R   | W   | NM_000238.4(KCNH2):c.3103C>T (p.Arg1035Trp) | Long QT syndrome not provided Arrhythmia                                                                                                | Uncertain significance(Last reviewed: Jan 20, 2021)                       | criteria provided, multiple submitters, no conflicts | VCV000067468 | 7                | 150947377      | 67468       | 78364       | rs199473543  | Neutral    | 0.332    | 0.433        | 0.235    |
| KCNH2 | 1036 | G   | D   | NM_000238.4(KCNH2):c.3107G>A (p.Gly1036Asp) | Long QT syndrome Congenital long QT syndrome Arrhythmia not provided not specified                                                      | Uncertain significance(Last reviewed: Nov 22, 2021)                       | criteria provided, multiple submitters, no conflicts | VCV000067469 | 7                | 150947373      | 67469       | 78365       | rs199473022  | GOF        | 0.467    | 0.204        | 0.329    |
| KCNH2 | 1037 | D   | N   | NM_000238.4(KCNH2):c.3109G>A (p.Asp1037Asn) | Long QT syndrome Arrhythmia not provided                                                                                                | Uncertain significance(Last reviewed: Mar 24, 2021)                       | criteria provided, multiple submitters, no conflicts | VCV000067470 | 7                | 150947371      | 67470       | 78366       | rs199473023  | GOF        | 0.406    | 0.171        | 0.423    |
| KCNH2 | 1038 | V   | L   | NM_000238.4(KCNH2):c.3112G>T (p.Val1038Leu) | Long QT syndrome Arrhythmia                                                                                                             | Uncertain significance(Last reviewed: Mar 12, 2019)                       | criteria provided, multiple submitters, no conflicts | VCV000405360 | 7                | 150947368      | 405360      | 395853      | rs199473544  | Neutral    | 0.455    | 0.383        | 0.163    |
| KCNH2 | 1038 | V   | M   | NM_000238.4(KCNH2):c.3112G>A (p.Val1038Met) | Arrhythmia not specified not provided Long QT syndrome Congenital long QT syndrome Long QT syndrome 2                                   | Conflicting interpretations of pathogenicity(Last reviewed: Dec 19, 2021) | criteria provided, conflicting interpretations       | VCV000067471 | 7                | 150947368      | 67471       | 78367       | rs199473544  | Neutral    | 0.444    | 0.394        | 0.162    |
| KCNH2 | 1040 | S   | G   | NM_000238.4(KCNH2):c.3118A>G (p.Ser1040Gly) | Long QT syndrome Arrhythmia SUDDEN INFANT DEATH SYNDROME                                                                                | Uncertain significance(Last reviewed: Apr 5, 2021)                        | criteria provided, multiple submitters, no conflicts | VCV000067472 | 7                | 150947362      | 67472       | 78368       | rs199473024  | GOF        | 0.418    | 0.259        | 0.323    |
| KCNH2 | 1040 | S   | N   | NM_000238.4(KCNH2):c.3119G>A (p.Ser1040Asn) | not provided                                                                                                                            | Uncertain significance(Last reviewed: Jul 29, 2014)                       | criteria provided, single submitter                  | VCV000200526 | 7                | 150947361      | 200526      | 197141      | rs794728404  | GOF        | 0.418    | 0.203        | 0.38     |
| KCNH2 | 1042 | L   | P   | NM_000238.4(KCNH2):c.3125T>C (p.Leu1042Pro) | not provided Cardiovascular phenotype                                                                                                   | Conflicting interpretations of pathogenicity(Last reviewed: Aug 19, 2016) | criteria provided, conflicting interpretations       | VCV000264155 | 7                | 150947355      | 264155      | 258465      | rs886039064  | Neutral    | 0.633    | 0.227        | 0.14     |
| KCNH2 | 1042 | L   | V   | NM_000238.4(KCNH2):c.3124C>G (p.Leu1042Val) | Hypertrophic cardiomyopathy                                                                                                             | Uncertain significance(Last reviewed: Apr 30, 2017)                       | criteria provided, single submitter                  | VCV000427971 | 7                | 150947356      | 427971      | 419273      | rs1346047270 | Neutral    | 0.54     | 0.319        | 0.141    |
| KCNH2 | 1045 | L   | F   | NM_000238.4(KCNH2):c.3133C>T (p.Leu1045Phe) | Arrhythmogenic right ventricular cardiomyopathy Primary dilated cardiomyopathy Congenital long QT syndrome  Long QT syndrome Arrhythmia | Benign(Last reviewed: Jul 27, 2020)                                       | criteria provided, multiple submitters, no conflicts | VCV000067473 | 7                | 150947347      | 67473       | 78369       | rs199473025  | Neutral    | 0.527    | 0.351        | 0.122    |
| KCNH2 | 1045 | L   | R   | NM_000238.4(KCNH2):c.3134T>G (p.Leu1045Arg) | Long QT syndrome                                                                                                                        | Uncertain significance(Last reviewed: Sep 7, 2020)                        | criteria provided, single submitter                  | VCV001025586 | 7                | 150947346      | 1025586     | 1007333     | rs1800934753 | Neutral    | 0.665    | 0.17         | 0.166    |
| KCNH2 | 1047 | R   | C   | NM_000238.4(KCNH2):c.3139C>T (p.Arg1047Cys) | not provided Long QT syndrome                                                                                                           | Uncertain significance(Last reviewed: Oct 9, 2020)                        | criteria provided, multiple submitters, no conflicts | VCV000161255 | 7                | 150947341      | 161255      | 171106      | rs377095107  | Neutral    | 0.329    | 0.446        | 0.224    |
| KCNH2 | 1047 | R   | H   | NM_000238.4(KCNH2):c.3140G>A (p.Arg1047His) | Long QT syndrome Arrhythmia                                                                                                             | Uncertain significance(Last reviewed: Oct 5, 2020)                        | criteria provided, multiple submitters, no           | VCV000628410 | 7                | 150947340      | 628410      | 617339      | rs36210421   | GOF        | 0.371    | 0.313        | 0.316    |

| gene  | pos  | aa1 | aa2 | Name                                        | Condition(s)                                                                                                                                     | Clinical significance (Last reviewed)                                      | Review status                                        | Accession     | GRCh38Chromosome | GRCh38Location | VariationID | AlleleID(s) | dbSNP ID     | prediction | prob.LOF | prob.Neutral | prob.GOF |  |
|-------|------|-----|-----|---------------------------------------------|--------------------------------------------------------------------------------------------------------------------------------------------------|----------------------------------------------------------------------------|------------------------------------------------------|---------------|------------------|----------------|-------------|-------------|--------------|------------|----------|--------------|----------|--|
|       |      |     |     |                                             |                                                                                                                                                  |                                                                            | conflicts                                            |               |                  |                |             |             |              |            |          |              |          |  |
| KCNH2 | 1047 | R   | L   | NM_000238.4(KCNH2):c.3140G>T (p.Arg1047Leu) | Long QT syndrome Long QT syndrome 2  Cardiovascular phenotype Arrhythmia Sudden unexplained death not specified Torsades de pointes not provided | Conflicting interpretations of pathogenicity (Last reviewed: Oct 5, 2021)  | criteria provided, conflicting interpretations       | VCV000036429  | 7                | 150947340      | 36429       | 45092       | rs36210421   | Neutral    | 0.319    | 0.432        | 0.25     |  |
| KCNH2 | 1049 | L   | P   | NM_000238.4(KCNH2):c.3146T>C (p.Leu1049Pro) | Congenital long QT syndrome                                                                                                                      | not provided                                                               | no assertion provided                                | VCV000067474  | 7                | 150947334      | 67474       | 78370       | rs199473026  | Neutral    | 0.649    | 0.217        | 0.134    |  |
| KCNH2 | 1051 | R   | S   | NM_000238.4(KCNH2):c.3153G>T (p.Arg1051Ser) | Long QT syndrome                                                                                                                                 | Uncertain significance (Last reviewed: Jul 6, 2019)                        | criteria provided, single submitter                  | VCV0000952274 | 7                | 150947054      | 952274      | 924751      | rs1800920453 | GOF        | 0.398    | 0.288        | 0.314    |  |
| KCNH2 | 1055 | R   | Q   | NM_000238.4(KCNH2):c.3164G>A (p.Arg1055Gln) | not provided not specified Cardiovascular phenotype Long QT syndrome Arrhythmia                                                                  | Conflicting interpretations of pathogenicity (Last reviewed: Sep 17, 2020) | criteria provided, conflicting interpretations       | VCV000067475  | 7                | 150947043      | 67475       | 78371       | rs41307270   | GOF        | 0.442    | 0.242        | 0.316    |  |
| KCNH2 | 1057 | S   | N   | NM_000238.4(KCNH2):c.3170G>A (p.Ser1057Asn) | Long QT syndrome                                                                                                                                 | Uncertain significance (Last reviewed: Feb 14, 2020)                       | criteria provided, single submitter                  | VCV001022238  | 7                | 150947037      | 1022238     | 1007332     | rs765524161  | GOF        | 0.527    | 0.187        | 0.286    |  |
| KCNH2 | 1058 | A   | E   | NM_000238.4(KCNH2):c.3173C>A (p.Ala1058Glu) | not provided                                                                                                                                     | not provided                                                               | no assertion provided                                | VCV000067476  | 7                | 150947034      | 67476       | 78372       | rs41313752   | GOF        | 0.528    | 0.209        | 0.263    |  |
| KCNH2 | 1058 | A   | T   | NM_000238.4(KCNH2):c.3172G>A (p.Ala1058Thr) | Long QT syndrome                                                                                                                                 | Uncertain significance (Last reviewed: May 31, 2017)                       | criteria provided, single submitter                  | VCV000456924  | 7                | 150947035      | 456924      | 457054      | rs555269990  | Neutral    | 0.47     | 0.282        | 0.248    |  |
| KCNH2 | 1060 | M   | V   | NM_000238.4(KCNH2):c.3178A>G (p.Met1060Val) | Arrhythmia                                                                                                                                       | Uncertain significance (Last reviewed: Feb 26, 2019)                       | criteria provided, single submitter                  | VCV0000924650 | 7                | 150947029      | 924650      | 910675      | rs767156792  | Neutral    | 0.503    | 0.345        | 0.152    |  |
| KCNH2 | 1062 | T   | I   | NM_000238.4(KCNH2):c.3185C>T (p.Thr1062Ile) | not provided Long QT syndrome                                                                                                                    | Uncertain significance (Last reviewed: Jul 10, 2018)                       | criteria provided, multiple submitters, no conflicts | VCV000586073  | 7                | 150947022      | 586073      | 576958      | rs761811244  | Neutral    | 0.352    | 0.472        | 0.176    |  |
| KCNH2 | 1063 | V   | L   | NM_000238.4(KCNH2):c.3187G>C (p.Val1063Leu) | Long QT syndrome                                                                                                                                 | Uncertain significance (Last reviewed: Aug 10, 2020)                       | criteria provided, single submitter                  | VCV000845043  | 7                | 150947020      | 845043      | 833314      | rs139722868  | Neutral    | 0.634    | 0.239        | 0.127    |  |
| KCNH2 | 1064 | L   | R   | NM_000238.4(KCNH2):c.3191T>G (p.Leu1064Arg) | Long QT syndrome                                                                                                                                 | Uncertain significance (Last reviewed: Jun 4, 2019)                        | criteria provided, single submitter                  | VCV000845095  | 7                | 150947016      | 845095      | 833313      | rs1800917926 | LOF        | 0.712    | 0.142        | 0.145    |  |
| KCNH2 | 1066 | L   | V   | NM_000238.4(KCNH2):c.3196C>G (p.Leu1066Val) | Congenital long QT syndrome                                                                                                                      | not provided                                                               | no assertion provided                                | VCV000067479  | 7                | 150947011      | 67479       | 78375       | rs199473027  | Neutral    | 0.574    | 0.293        | 0.134    |  |
| KCNH2 | 1068 | Q   | R   | NM_000238.4(KCNH2):c.3203A>G (p.Gln1068Arg) | Long QT syndrome not provided Cardiovascular phenotype Arrhythmia                                                                                | Conflicting interpretations of pathogenicity (Last reviewed: Mar 16, 2021) | criteria provided, conflicting interpretations       | VCV000067480  | 7                | 150947004      | 67480       | 78376       | rs151031345  | GOF        | 0.489    | 0.187        | 0.323    |  |
| KCNH2 | 1070 | Q   | L   | NM_000238.4(KCNH2):c.3209A>T (p.Gln1070Leu) | Long QT syndrome                                                                                                                                 | Uncertain significance (Last reviewed: Sep 9, 2020)                        | criteria provided, single submitter                  | VCV001043117  | 7                | 150946998      | 1043117     | 1027880     | rs1386424341 | Neutral    | 0.353    | 0.407        | 0.24     |  |
| KCNH2 | 1075 | P   | L   | NM_000238.4(KCNH2):c.3224C>T (p.Pro1075Leu) | Long QT syndrome Congenital long QT syndrome Long QT syndrome 2                                                                                  | Uncertain significance (Last reviewed: May 28, 2019)                       | criteria provided, multiple submitters, no conflicts | VCV000067481  | 7                | 150946983      | 67481       | 78377       | rs199473028  | Neutral    | 0.373    | 0.352        | 0.274    |  |
| KCNH2 | 1075 | P   | Q   | NM_000238.4(KCNH2):c.3224C>A                | Arrhythmia                                                                                                                                       | Uncertain                                                                  | criteria                                             | VCV000629130  | 7                | 150946983      | 629130      | 617336      | rs199473028  | GOF        | 0.399    | 0.215        | 0.387    |  |

| gene  | pos  | aa1 | aa2 | Name                                        | Condition(s)                                                                             | Clinical significance (Last reviewed)               | Review status                                        | Accession    | GRCh38Chromosome | GRCh38Location | VariationID | AlleleID(s) | dbSNP ID     | prediction | prob.LOF | prob.Neutral | prob.GOF |
|-------|------|-----|-----|---------------------------------------------|------------------------------------------------------------------------------------------|-----------------------------------------------------|------------------------------------------------------|--------------|------------------|----------------|-------------|-------------|--------------|------------|----------|--------------|----------|
|       |      |     |     | (p.Pro1075Gln)                              |                                                                                          | significance(Last reviewed: Aug 28, 2018)           | provided, single submitter                           |              |                  |                |             |             |              |            |          |              |          |
| KCNH2 | 1077 | A   | T   | NM_000238.4(KCNH2):c.3229G>A (p.Ala1077Thr) | not provided Long QT syndrome Arrhythmia                                                 | Uncertain significance(Last reviewed: Jun 10, 2021) | criteria provided, multiple submitters, no conflicts | VCV000526983 | 7                | 150946978      | 526983      | 522440      | rs201382073  | GOF        | 0.399    | 0.229        | 0.372    |
| KCNH2 | 1078 | Y   | C   | NM_000238.4(KCNH2):c.3233A>G (p.Tyr1078Cys) | Long QT syndrome Congenital long QT syndrome not specified                               | Uncertain significance(Last reviewed: Mar 22, 2019) | criteria provided, multiple submitters, no conflicts | VCV000067483 | 7                | 150946974      | 67483       | 78379       | rs199473029  | Neutral    | 0.401    | 0.423        | 0.176    |
| KCNH2 | 1083 | T   | A   | NM_000238.4(KCNH2):c.3247A>G (p.Thr1083Ala) | not provided Arrhythmia Long QT syndrome                                                 | Uncertain significance(Last reviewed: Oct 26, 2020) | criteria provided, multiple submitters, no conflicts | VCV000200529 | 7                | 150946960      | 200529      | 197137      | rs751559990  | Neutral    | 0.358    | 0.336        | 0.306    |
| KCNH2 | 1084 | P   | L   | NM_000238.4(KCNH2):c.3251C>T (p.Pro1084Leu) | Cardiovascular phenotype Long QT syndrome  Arrhythmia                                    | Uncertain significance(Last reviewed: Oct 9, 2019)  | criteria provided, multiple submitters, no conflicts | VCV000456925 | 7                | 150946956      | 456925      | 456805      | rs762510312  | Neutral    | 0.352    | 0.331        | 0.316    |
| KCNH2 | 1088 | P   | R   | NM_000238.4(KCNH2):c.3263C>G (p.Pro1088Arg) | Long QT syndrome                                                                         | Uncertain significance(Last reviewed: Aug 5, 2019)  | criteria provided, single submitter                  | VCV000954908 | 7                | 150946944      | 954908      | 945516      | rs1800912992 | GOF        | 0.412    | 0.198        | 0.391    |
| KCNH2 | 1093 | P   | L   | NM_000238.4(KCNH2):c.3278C>T (p.Pro1093Leu) | Arrhythmia Congenital long QT syndrome not specified Long QT syndrome Long QT syndrome 2 | Uncertain significance(Last reviewed: Oct 20, 2020) | criteria provided, multiple submitters, no conflicts | VCV000067485 | 7                | 150946929      | 67485       | 78381       | rs199473545  | Neutral    | 0.344    | 0.344        | 0.311    |
| KCNH2 | 1096 | P   | S   | NM_000238.4(KCNH2):c.3286C>T (p.Pro1096Ser) | Arrhythmia                                                                               | Uncertain significance(Last reviewed: Sep 23, 2019) | criteria provided, single submitter                  | VCV000921691 | 7                | 150946921      | 921691      | 910671      | rs1554423737 | GOF        | 0.364    | 0.202        | 0.434    |
| KCNH2 | 1096 | P   | T   | NM_000238.4(KCNH2):c.3286C>A (p.Pro1096Thr) | Long QT syndrome                                                                         | Uncertain significance(Last reviewed: Mar 9, 2017)  | criteria provided, single submitter                  | VCV000456927 | 7                | 150946921      | 456927      | 456465      | rs1554423737 | GOF        | 0.356    | 0.21         | 0.434    |
| KCNH2 | 1097 | V   | I   | NM_000238.4(KCNH2):c.3289G>A (p.Val1097Ile) | Long QT syndrome not specified not provided  Cardiovascular phenotype Arrhythmia         | Uncertain significance(Last reviewed: Sep 13, 2021) | criteria provided, multiple submitters, no conflicts | VCV000067486 | 7                | 150946918      | 67486       | 78382       | rs199473030  | Neutral    | 0.521    | 0.31         | 0.169    |
| KCNH2 | 1098 | S   | R   | NM_000238.4(KCNH2):c.3292A>C (p.Ser1098Arg) | Long QT syndrome                                                                         | Uncertain significance(Last reviewed: Nov 12, 2019) | criteria provided, single submitter                  | VCV000966117 | 7                | 150946915      | 966117      | 955091      | rs1800911203 | GOF        | 0.419    | 0.196        | 0.385    |
| KCNH2 | 1098 | S   | R   | NM_000238.4(KCNH2):c.3292A>C (p.Ser1098Arg) | Long QT syndrome                                                                         | Uncertain significance(Last reviewed: Nov 12, 2019) | criteria provided, single submitter                  | VCV000966117 | 7                | 150946915      | 966117      | 955091      | rs1800911203 | GOF        | 0.419    | 0.196        | 0.385    |
| KCNH2 | 1098 | S   | R   | NM_000238.4(KCNH2):c.3294C>G (p.Ser1098Arg) | Arrhythmia                                                                               | Uncertain significance(Last reviewed: Mar 9, 2019)  | criteria provided, single submitter                  | VCV000928123 | 7                | 150946913      | 928123      | 910669      | rs1203403811 | GOF        | 0.419    | 0.196        | 0.385    |
| KCNH2 | 1098 | S   | R   | NM_000238.4(KCNH2):c.3294C>G (p.Ser1098Arg) | Arrhythmia                                                                               | Uncertain significance(Last reviewed: Mar 9, 2019)  | criteria provided, single submitter                  | VCV000928123 | 7                | 150946913      | 928123      | 910669      | rs1203403811 | GOF        | 0.419    | 0.196        | 0.385    |
| KCNH2 | 1099 | P   | L   | NM_000238.4(KCNH2):c.3296C>T                | Long QT syndrome                                                                         | Uncertain                                           | criteria                                             | VCV000526951 | 7                | 150946911      | 526951      | 522764      | rs1339742380 | Neutral    | 0.409    | 0.342        | 0.249    |

| gene  | pos  | aa1 | aa2 | Name                                        | Condition(s)                                                          | Clinical significance (Last reviewed)                                    | Review status                                        | Accession    | GRCh38Chromosome | GRCh38Location | VariationID | AlleleID(s) | dbSNP ID     | prediction | prob.LOF | prob.Neutral | prob.GOF |
|-------|------|-----|-----|---------------------------------------------|-----------------------------------------------------------------------|--------------------------------------------------------------------------|------------------------------------------------------|--------------|------------------|----------------|-------------|-------------|--------------|------------|----------|--------------|----------|
|       |      |     |     | (p.Pro1099Leu)                              |                                                                       | significance(Last reviewed: Apr 4, 2018)                                 | provided, single submitter                           |              |                  |                |             |             |              |            |          |              |          |
| KCNH2 | 1101 | P   | L   | NM_000238.4(KCNH2):c.3302C>T (p.Pro1101Leu) | Congenital long QT syndrome                                           | not provided                                                             | no assertion provided                                | VCV000067487 | 7                | 150946905      | 67487       | 78383       | rs199473041  | Neutral    | 0.391    | 0.35         | 0.259    |
| KCNH2 | 1102 | T   | I   | NM_000238.4(KCNH2):c.3305C>T (p.Thr1102Ile) | not provided Long QT syndrome Arrhythmia                              | Uncertain significance(Last reviewed: Oct 9, 2020)                       | criteria provided, multiple submitters, no conflicts | VCV000200531 | 7                | 150946902      | 200531      | 197135      | rs794728405  | Neutral    | 0.339    | 0.333        | 0.328    |
| KCNH2 | 1107 | S   | L   | NM_000238.4(KCNH2):c.3320C>T (p.Ser1107Leu) | Long QT syndrome Short QT syndrome 1                                  | Uncertain significance(Last reviewed: Dec 3, 2019)                       | criteria provided, multiple submitters, no conflicts | VCV000843735 | 7                | 150946887      | 843735      | 833312      | rs1303580599 | Neutral    | 0.337    | 0.361        | 0.302    |
| KCNH2 | 1108 | L   | V   | NM_000238.4(KCNH2):c.3322C>G (p.Leu1108Val) | Long QT syndrome Arrhythmic Long QT syndrome 2 not provided           | Conflicting interpretations of pathogenicity(Last reviewed: Oct 6, 2020) | criteria provided, conflicting interpretations       | VCV000067488 | 7                | 150946885      | 67488       | 78384       | rs199473031  | Neutral    | 0.528    | 0.296        | 0.176    |
| KCNH2 | 1115 | M   | V   | NM_000238.4(KCNH2):c.3343A>G (p.Met1115Val) | Long QT syndrome Arrhythmic not provided  Congenital long QT syndrome | Uncertain significance(Last reviewed: Dec 16, 2019)                      | criteria provided, multiple submitters, no conflicts | VCV000067490 | 7                | 150945502      | 67490       | 78386       | rs199473546  | Neutral    | 0.504    | 0.314        | 0.181    |
| KCNH2 | 1116 | A   | V   | NM_000238.4(KCNH2):c.3347C>T (p.Ala1116Val) | Long QT syndrome Arrhythmic Congenital long QT syndrome               | Uncertain significance(Last reviewed: Mar 10, 2021)                      | criteria provided, multiple submitters, no conflicts | VCV000067491 | 7                | 150945498      | 67491       | 78387       | rs199473032  | Neutral    | 0.445    | 0.301        | 0.254    |
| KCNH2 | 1117 | C   | Y   | NM_000238.4(KCNH2):c.3350G>A (p.Cys1117Tyr) | Ventricular tachycardia                                               | Uncertain significance(Last reviewed: May 7, 2014)                       | no assertion criteria provided                       | VCV000180385 | 7                | 150945495      | 180385      | 178572      | rs730880119  | Neutral    | 0.532    | 0.299        | 0.169    |
| KCNH2 | 1118 | E   | K   | NM_000238.4(KCNH2):c.3352G>A (p.Glu1118Lys) | Long QT syndrome                                                      | Uncertain significance(Last reviewed: Jun 7, 2020)                       | criteria provided, single submitter                  | VCV000855130 | 7                | 150945493      | 855130      | 833311      | rs1800858264 | GOF        | 0.458    | 0.223        | 0.32     |
| KCNH2 | 1119 | E   | Q   | NM_000238.4(KCNH2):c.3355G>C (p.Glu1119Gln) | Long QT syndrome not provided Arrhythmia                              | Uncertain significance(Last reviewed: Jul 28, 2021)                      | criteria provided, multiple submitters, no conflicts | VCV000067492 | 7                | 150945490      | 67492       | 78388       | rs199473033  | GOF        | 0.472    | 0.233        | 0.296    |
| KCNH2 | 1120 | L   | V   | NM_000238.4(KCNH2):c.3358C>G (p.Leu1120Val) | Long QT syndrome                                                      | Uncertain significance(Last reviewed: Aug 8, 2018)                       | criteria provided, single submitter                  | VCV000661932 | 7                | 150945487      | 661932      | 635884      | rs1584839287 | Neutral    | 0.558    | 0.265        | 0.177    |
| KCNH2 | 1121 | P   | S   | NM_000238.4(KCNH2):c.3361C>T (p.Pro1121Ser) | Long QT syndrome Arrhythmia                                           | Uncertain significance(Last reviewed: Feb 18, 2021)                      | criteria provided, multiple submitters, no conflicts | VCV000920215 | 7                | 150945484      | 920215      | 910665      | rs1800857722 | GOF        | 0.426    | 0.209        | 0.366    |
| KCNH2 | 1122 | P   | L   | NM_000238.4(KCNH2):c.3365C>T (p.Pro1122Leu) | Arrhythmic not provided Long QT syndrome                              | Uncertain significance(Last reviewed: Feb 15, 2022)                      | criteria provided, multiple submitters, no conflicts | VCV000200534 | 7                | 150945480      | 200534      | 197129      | rs531460655  | Neutral    | 0.452    | 0.311        | 0.237    |
| KCNH2 | 1122 | P   | R   | NM_000238.4(KCNH2):c.3365C>G (p.Pro1122Arg) | not specified                                                         | Uncertain significance(Last reviewed: Jul 3, 2014)                       | no assertion criteria provided                       | VCV000234998 | 7                | 150945480      | 234998      | 236768      | rs531460655  | GOF        | 0.462    | 0.223        | 0.315    |
| KCNH2 | 1127 | L   | F   | NM_000238.4(KCNH2):c.3379C>T (p.Leu1127Phe) | Arrhythmia                                                            | Uncertain significance(Last reviewed: Jul 3, 2014)                       | criteria provided, single submitter                  | VCV000923705 | 7                | 150945466      | 923705      | 910664      | rs1800856518 | Neutral    | 0.518    | 0.314        | 0.169    |

| gene  | pos  | aa1 | aa2 | Name                                        | Condition(s)                                                                                                                   | Clinical significance (Last reviewed)                                    | Review status                                        | Accession    | GRCh38Chromosome | GRCh38Location | VariationID | AlleleID(s) | dbSNP ID     | prediction | prob.LOF | prob.Neutral | prob.GOF |
|-------|------|-----|-----|---------------------------------------------|--------------------------------------------------------------------------------------------------------------------------------|--------------------------------------------------------------------------|------------------------------------------------------|--------------|------------------|----------------|-------------|-------------|--------------|------------|----------|--------------|----------|
|       |      |     |     |                                             |                                                                                                                                | reviewed: Apr 14, 2019)                                                  | submitter                                            |              |                  |                |             |             |              |            |          |              |          |
| KCNH2 | 1131 | G   | V   | NM_000238.4(KCNH2):c.3392G>T (p.Gly1131Val) | Arrhythmia                                                                                                                     | Uncertain significance(Last reviewed: Dec 3, 2018)                       | criteria provided, single submitter                  | VCV000918364 | 7                | 150945453      | 918364      | 910663      | rs370558996  | Neutral    | 0.466    | 0.29         | 0.244    |
| KCNH2 | 1132 | P   | A   | NM_000238.4(KCNH2):c.3394C>G (p.Pro1132Ala) | Arrhythmia not provided Long QT syndrome                                                                                       | Uncertain significance(Last reviewed: Jul 28, 2021)                      | criteria provided, multiple submitters, no conflicts | VCV000191469 | 7                | 150945451      | 191469      | 189256      | rs786205422  | Neutral    | 0.459    | 0.294        | 0.247    |
| KCNH2 | 1135 | R   | H   | NM_000238.4(KCNH2):c.3404G>A (p.Arg1135His) | short QT syndrome                                                                                                              | not provided                                                             | no assertion provided                                | VCV000067493 | 7                | 150945441      | 67493       | 78389       | rs199473547  | Neutral    | 0.467    | 0.281        | 0.252    |
| KCNH2 | 1136 | L   | F   | NM_000238.4(KCNH2):c.3406C>T (p.Leu1136Phe) | Long QT syndrome                                                                                                               | Uncertain significance(Last reviewed: Apr 30, 2020)                      | criteria provided, single submitter                  | VCV001035669 | 7                | 150945439      | 1035669     | 1027879     | rs1344656004 | Neutral    | 0.534    | 0.312        | 0.154    |
| KCNH2 | 1139 | P   | L   | NM_000238.4(KCNH2):c.3416C>T (p.Pro1139Leu) | Long QT syndrome                                                                                                               | Uncertain significance(Last reviewed: Jun 14, 2016)                      | criteria provided, single submitter                  | VCV000359302 | 7                | 150945429      | 359302      | 310302      | rs886062086  | Neutral    | 0.405    | 0.34         | 0.254    |
| KCNH2 | 1144 | A   | T   | NM_000238.4(KCNH2):c.3430G>A (p.Ala1144Thr) | Congenital long QT syndrome                                                                                                    | not provided                                                             | no assertion provided                                | VCV000067495 | 7                | 150945415      | 67495       | 78391       | rs199473034  | GOF        | 0.436    | 0.204        | 0.36     |
| KCNH2 | 1146 | T   | S   | NM_000238.4(KCNH2):c.3436A>T (p.Thr1146Ser) | not provided Short QT syndrome 1 Long QT syndrome 2 Arrhythmia Cardiovascular phenotype Long QT syndrome                       | Conflicting interpretations of pathogenicity(Last reviewed: Dec 6, 2020) | criteria provided, conflicting interpretations       | VCV000359301 | 7                | 150945409      | 359301      | 302179      | rs778879572  | GOF        | 0.39     | 0.193        | 0.417    |
| KCNH2 | 1153 | H   | Y   | NM_000238.4(KCNH2):c.3457C>T (p.His1153Tyr) | Long QT syndrome Arrhythmia Long QT syndrome 2 Long QT syndrome 2 Short QT syndrome 1 not provided Congenital long QT syndrome | Uncertain significance(Last reviewed: Jun 15, 2021)                      | criteria provided, multiple submitters, no conflicts | VCV000067497 | 7                | 150945388      | 67497       | 78393       | rs199473035  | Neutral    | 0.388    | 0.334        | 0.278    |
| KCNH2 | 1154 | G   | S   | NM_000238.4(KCNH2):c.3460G>A (p.Gly1154Ser) | Long QT syndrome Arrhythmia not provided                                                                                       | Uncertain significance(Last reviewed: Jan 2, 2020)                       | criteria provided, multiple submitters, no conflicts | VCV000067498 | 7                | 150945385      | 67498       | 78394       | rs199473548  | GOF        | 0.434    | 0.178        | 0.387    |
| KCNH2 | 1156 | D   | G   | NM_000238.4(KCNH2):c.3467A>G (p.Asp1156Gly) | Arrhythmia                                                                                                                     | Uncertain significance(Last reviewed: Dec 11, 2019)                      | criteria provided, single submitter                  | VCV000926485 | 7                | 150945378      | 926485      | 910660      | rs1266712553 | Neutral    | 0.475    | 0.258        | 0.267    |
| KCNH2 | 1157 | P   | L   | NM_000238.4(KCNH2):c.3470C>T (p.Pro1157Leu) | Long QT syndrome not provided SUDDEN INFANT DEATH SYNDROME Arrhythmia                                                          | Uncertain significance(Last reviewed: Jun 22, 2021)                      | criteria provided, multiple submitters, no conflicts | VCV000067499 | 7                | 150945375      | 67499       | 78395       | rs143167166  | Neutral    | 0.465    | 0.31         | 0.225    |
| KCNH2 | 1157 | P   | S   | NM_000238.4(KCNH2):c.3469C>T (p.Pro1157Ser) | Arrhythmia Long QT syndrome                                                                                                    | Uncertain significance(Last reviewed: Mar 19, 2021)                      | criteria provided, multiple submitters, no conflicts | VCV000456933 | 7                | 150945376      | 456933      | 457045      | rs1449906095 | GOF        | 0.452    | 0.227        | 0.321    |
| KCNH5 | 5    | K   | N   | NM_139318.5(KCNH5):c.15G>C (p.Lys5Asn)      | Early infantile epileptic encephalopathy with suppression bursts                                                               | Uncertain significance(Last reviewed: Feb 2, 2020)                       | criteria provided, single submitter                  | VCV000949152 | 14               | 63045172       | 949152      | 927115      | rs775719605  | Neutral    | 0.654    | 0.155        | 0.191    |
| KCNH5 | 58   | V   | I   | NM_139318.5(KCNH5):c.172G>A (p.Val58Ile)    | Early infantile epileptic encephalopathy with suppression bursts                                                               | Uncertain significance(Last reviewed: Oct 9, 2020)                       | criteria provided, single submitter                  | VCV001058253 | 14               | 63016856       | 1058253     | 1048593     | NA           | LOF        | 0.775    | 0.112        | 0.112    |
| KCNH5 | 89   | E   | Q   | NM_139318.5(KCNH5):c.265G>C (p.Glu89Gln)    | Early infantile epileptic encephalopathy with                                                                                  | Uncertain                                                                | criteria                                             | VCV000582493 | 14               | 63006405       | 582493      | 568969      | rs1162818997 | LOF        | 0.665    | 0.126        | 0.209    |



| gene  | pos | aa1 | aa2 | Name                                      | Condition(s)                                                              | Clinical significance (Last reviewed)               | Review status                       | Accession    | GRCh38Chromosome | GRCh38Location | VariationID | AlleleID(s) | dbSNP ID     | prediction | prob.LOF | prob.Neutral | prob.GOF |
|-------|-----|-----|-----|-------------------------------------------|---------------------------------------------------------------------------|-----------------------------------------------------|-------------------------------------|--------------|------------------|----------------|-------------|-------------|--------------|------------|----------|--------------|----------|
|       |     |     |     |                                           | suppression bursts                                                        | significance(Last reviewed: Jun 19, 2018)           | provided, single submitter          |              |                  |                |             |             |              |            |          |              |          |
| KCNH5 | 108 | Y   | C   | NM_139318.5(KCNH5):c.323A>G (p.Tyr108Cys) | Early infantile epileptic encephalopathy with suppression bursts          | Uncertain significance(Last reviewed: Feb 21, 2019) | criteria provided, single submitter | VCV000835675 | 14               | 63001441       | 835675      | 841578      | rs1464940813 | LOF        | 0.848    | 0.073        | 0.079    |
| KCNH5 | 141 | D   | A   | NM_139318.5(KCNH5):c.422A>C (p.Asp141Ala) | Early infantile epileptic encephalopathy with suppression bursts          | Uncertain significance(Last reviewed: Mar 11, 2020) | criteria provided, single submitter | VCV001035483 | 14               | 63001342       | 1035483     | 1031646     | rs1891006879 | Neutral    | 0.568    | 0.232        | 0.199    |
| KCNH5 | 147 | T   | M   | NM_139318.5(KCNH5):c.440C>T (p.Thr147Met) | Early infantile epileptic encephalopathy with suppression bursts          | Uncertain significance(Last reviewed: Oct 23, 2019) | criteria provided, single submitter | VCV000860425 | 14               | 62987181       | 860425      | 841577      | rs180894715  | Neutral    | 0.619    | 0.186        | 0.195    |
| KCNH5 | 154 | R   | W   | NM_139318.5(KCNH5):c.460C>T (p.Arg154Trp) | Early infantile epileptic encephalopathy with suppression bursts          | Uncertain significance(Last reviewed: Dec 18, 2017) | criteria provided, single submitter | VCV000530526 | 14               | 62987161       | 530526      | 528714      | rs745970423  | LOF        | 0.681    | 0.14         | 0.179    |
| KCNH5 | 158 | N   | K   | NM_139318.5(KCNH5):c.474T>G (p.Asn158Lys) | Early infantile epileptic encephalopathy with suppression bursts          | Benign(Last reviewed: Jun 7, 2020)                  | criteria provided, single submitter | VCV000848600 | 14               | 62987147       | 848600      | 841576      | rs1890724757 | LOF        | 0.69     | 0.094        | 0.216    |
| KCNH5 | 167 | T   | M   | NM_139318.5(KCNH5):c.500C>T (p.Thr167Met) | Early infantile epileptic encephalopathy with suppression bursts          | Uncertain significance(Last reviewed: Feb 26, 2018) | criteria provided, single submitter | VCV000569692 | 14               | 62987121       | 569692      | 568968      | rs771253745  | Neutral    | 0.628    | 0.178        | 0.194    |
| KCNH5 | 172 | T   | R   | NM_139318.5(KCNH5):c.515C>G (p.Thr172Arg) | Early infantile epileptic encephalopathy with suppression bursts          | Likely benign(Last reviewed: Sep 29, 2020)          | criteria provided, single submitter | VCV000698214 | 14               | 62987106       | 698214      | 688322      | rs34764419   | Neutral    | 0.64     | 0.172        | 0.187    |
| KCNH5 | 184 | V   | I   | NM_139318.5(KCNH5):c.550G>A (p.Val184Ile) | Early infantile epileptic encephalopathy with suppression bursts          | Uncertain significance(Last reviewed: Jun 30, 2017) | criteria provided, single submitter | VCV000461397 | 14               | 62981264       | 461397      | 463348      | rs752609494  | LOF        | 0.762    | 0.123        | 0.115    |
| KCNH5 | 204 | P   | L   | NM_139318.5(KCNH5):c.611C>T (p.Pro204Leu) | Early infantile epileptic encephalopathy with suppression bursts          | Uncertain significance(Last reviewed: Aug 16, 2017) | criteria provided, single submitter | VCV000530445 | 14               | 62981203       | 530445      | 528233      | rs776842795  | LOF        | 0.691    | 0.142        | 0.168    |
| KCNH5 | 245 | I   | L   | NM_139318.5(KCNH5):c.733A>T (p.Ile245Leu) | Early infantile epileptic encephalopathy with suppression bursts          | Uncertain significance(Last reviewed: Apr 23, 2020) | criteria provided, single submitter | VCV000999581 | 14               | 62981081       | 999581      | 995892      | rs754761406  | LOF        | 0.731    | 0.153        | 0.115    |
| KCNH5 | 245 | I   | V   | NM_139318.5(KCNH5):c.733A>G (p.Ile245Val) | Early infantile epileptic encephalopathy with suppression bursts          | Uncertain significance(Last reviewed: Jul 16, 2020) | criteria provided, single submitter | VCV000461398 | 14               | 62981081       | 461398      | 463877      | rs754761406  | LOF        | 0.736    | 0.147        | 0.116    |
| KCNH5 | 246 | A   | S   | NM_139318.5(KCNH5):c.736G>T (p.Ala246Ser) | Early infantile epileptic encephalopathy with suppression bursts          | Benign(Last reviewed: Sep 9, 2020)                  | criteria provided, single submitter | VCV000574962 | 14               | 62981078       | 574962      | 572835      | rs114447363  | LOF        | 0.788    | 0.088        | 0.124    |
| KCNH5 | 256 | V   | I   | NM_139318.5(KCNH5):c.766G>A (p.Val256Ile) | Early infantile epileptic encephalopathy with suppression bursts          | Uncertain significance(Last reviewed: May 16, 2017) | criteria provided, single submitter | VCV000461399 | 14               | 62981048       | 461399      | 464357      | rs756506083  | LOF        | 0.822    | 0.078        | 0.1      |
| KCNH5 | 263 | V   | I   | NM_139318.5(KCNH5):c.787G>A (p.Val263Ile) | Early infantile epileptic encephalopathy with suppression bursts Seizures | Uncertain significance(Last reviewed: Dec 11, 2017) | criteria provided, single submitter | VCV000530474 | 14               | 62981027       | 530474      | 528231      | rs760127525  | LOF        | 0.82     | 0.078        | 0.103    |
| KCNH5 | 273 | P   | S   | NM_139318.5(KCNH5):c.817C>T (p.Pro273Ser) | Early infantile epileptic encephalopathy with suppression bursts          | Uncertain significance(Last reviewed: Jun 29, 2020) | criteria provided, single submitter | VCV000960733 | 14               | 62980997       | 960733      | 948599      | rs747654948  | LOF        | 0.751    | 0.1          | 0.149    |

| gene  | pos | aa1 | aa2 | Name                                       | Condition(s)                                                                  | Clinical significance (Last reviewed)               | Review status                       | Accession    | GRCh38Chromosome | GRCh38Location | VariationID | AlleleID(s) | dbSNP ID     | prediction | prob.LOF | prob.Neutral | prob.GOF |
|-------|-----|-----|-----|--------------------------------------------|-------------------------------------------------------------------------------|-----------------------------------------------------|-------------------------------------|--------------|------------------|----------------|-------------|-------------|--------------|------------|----------|--------------|----------|
| KCNH5 | 274 | G   | S   | NM_139318.5(KCNH5):c.820G>A (p.Gly274Ser)  | Early infantile epileptic encephalopathy with suppression bursts              | Uncertain significance(Last reviewed: Oct 14, 2018) | criteria provided, single submitter | VCV000646789 | 14               | 62980994       | 646789      | 642535      | rs182494425  | LOF        | 0.789    | 0.073        | 0.139    |
| KCNH5 | 310 | E   | D   | NM_139318.5(KCNH5):c.930A>T (p.Glu310Asp)  | Early infantile epileptic encephalopathy with suppression bursts              | Uncertain significance(Last reviewed: Aug 25, 2020) | criteria provided, single submitter | VCV001040470 | 14               | 62980884       | 1040470     | 1031645     | rs201960719  | LOF        | 0.764    | 0.103        | 0.133    |
| KCNH5 | 327 | R   | H   | NM_139318.5(KCNH5):c.980G>A (p.Arg327His)  | not provided Early infantile epileptic encephalopathy with suppression bursts | Pathogenic(Last reviewed: Oct 7, 2020)              | criteria provided, single submitter | VCV000100784 | 14               | 62950522       | 100784      | 106649      | rs587777164  | GOF        | 0.497    | 0.044        | 0.459    |
| KCNH5 | 333 | R   | H   | NM_139318.5(KCNH5):c.998G>A (p.Arg333His)  | Early infantile epileptic encephalopathy with suppression bursts              | Uncertain significance(Last reviewed: Mar 12, 2020) | criteria provided, single submitter | VCV001042182 | 14               | 62950504       | 1042182     | 1031644     | rs1383017734 | GOF        | 0.505    | 0.049        | 0.446    |
| KCNH5 | 335 | A   | T   | NM_139318.5(KCNH5):c.1003G>A (p.Ala335Thr) | Early infantile epileptic encephalopathy with suppression bursts              | Uncertain significance(Last reviewed: May 17, 2017) | criteria provided, single submitter | VCV000461384 | 14               | 62950499       | 461384      | 463873      | rs376158544  | LOF        | 0.75     | 0.058        | 0.193    |
| KCNH5 | 366 | I   | M   | NM_139318.5(KCNH5):c.1098A>G (p.Ile366Met) | Early infantile epileptic encephalopathy with suppression bursts              | Benign(Last reviewed: Dec 2, 2020)                  | criteria provided, single submitter | VCV000416115 | 14               | 62950404       | 416115      | 399839      | rs146883958  | LOF        | 0.819    | 0.082        | 0.099    |
| KCNH5 | 374 | E   | K   | NM_139318.5(KCNH5):c.1120G>A (p.Glu374Lys) | Early infantile epileptic encephalopathy with suppression bursts              | Likely benign(Last reviewed: Sep 1, 2020)           | criteria provided, single submitter | VCV000940401 | 14               | 62950382       | 940401      | 936650      | rs1889977806 | LOF        | 0.828    | 0.095        | 0.077    |
| KCNH5 | 396 | I   | F   | NM_139318.5(KCNH5):c.1186A>T (p.Ile396Phe) | Early infantile epileptic encephalopathy with suppression bursts              | Uncertain significance(Last reviewed: Jun 9, 2019)  | criteria provided, single submitter | VCV000938564 | 14               | 62950316       | 938564      | 936649      | rs1889976030 | LOF        | 0.803    | 0.082        | 0.115    |
| KCNH5 | 401 | R   | C   | NM_139318.5(KCNH5):c.1201C>T (p.Arg401Cys) | Early infantile epileptic encephalopathy with suppression bursts              | Uncertain significance(Last reviewed: Oct 15, 2019) | criteria provided, single submitter | VCV000937814 | 14               | 62950301       | 937814      | 936648      | rs753034623  | Neutral    | 0.678    | 0.171        | 0.151    |
| KCNH5 | 401 | R   | H   | NM_139318.5(KCNH5):c.1202G>A (p.Arg401His) | Early infantile epileptic encephalopathy with suppression bursts              | Uncertain significance(Last reviewed: Aug 13, 2019) | criteria provided, single submitter | VCV000949515 | 14               | 62950300       | 949515      | 927114      | rs1461051682 | LOF        | 0.677    | 0.146        | 0.177    |
| KCNH5 | 407 | G   | A   | NM_139318.5(KCNH5):c.1220G>C (p.Gly407Ala) | Early infantile epileptic encephalopathy with suppression bursts              | Uncertain significance(Last reviewed: Jul 8, 2019)  | criteria provided, single submitter | VCV000950621 | 14               | 62950282       | 950621      | 927113      | rs1889974797 | LOF        | 0.769    | 0.092        | 0.139    |
| KCNH5 | 447 | M   | V   | NM_139318.5(KCNH5):c.1339A>G (p.Met447Val) | Early infantile epileptic encephalopathy with suppression bursts              | Uncertain significance(Last reviewed: Mar 29, 2017) | criteria provided, single submitter | VCV000461386 | 14               | 62950163       | 461386      | 463861      | rs200506671  | LOF        | 0.772    | 0.089        | 0.139    |
| KCNH5 | 449 | S   | L   | NM_139318.5(KCNH5):c.1346C>T (p.Ser449Leu) | Early infantile epileptic encephalopathy with suppression bursts              | Uncertain significance(Last reviewed: May 25, 2018) | criteria provided, single submitter | VCV000572837 | 14               | 62950156       | 572837      | 568956      | rs369774413  | LOF        | 0.835    | 0.045        | 0.12     |
| KCNH5 | 455 | V   | I   | NM_139318.5(KCNH5):c.1363G>A (p.Val455Ile) | Early infantile epileptic encephalopathy with suppression bursts              | Uncertain significance(Last reviewed: Jan 19, 2019) | criteria provided, single submitter | VCV000846406 | 14               | 62950139       | 846406      | 841574      | rs1224129490 | LOF        | 0.794    | 0.093        | 0.114    |
| KCNH5 | 467 | V   | A   | NM_139318.5(KCNH5):c.1400T>C (p.Val467Ala) | Early infantile epileptic encephalopathy with suppression bursts              | Uncertain significance(Last reviewed: Oct 14, 2020) | criteria provided, single submitter | VCV000948390 | 14               | 62849822       | 948390      | 927112      | rs1887769181 | LOF        | 0.826    | 0.054        | 0.12     |
| KCNH5 | 479 | N   | S   | NM_139318.5(KCNH5):c.1436A>G (p.Asn479Ser) | Early infantile epileptic encephalopathy with suppression bursts              | Uncertain significance(Last reviewed: Jan 21, 2020) | criteria provided, single submitter | VCV001001238 | 14               | 62849786       | 1001238     | 995891      | rs1887768573 | LOF        | 0.702    | 0.107        | 0.191    |

| gene  | pos | aa1 | aa2 | Name                                       | Condition(s)                                                                  | Clinical significance (Last reviewed)               | Review status                                        | Accession    | GRCh38Chromosome | GRCh38Location | VariationID | AlleleID(s) | dbSNP ID     | prediction | prob.LOF | prob.Neutral | prob.GOF |
|-------|-----|-----|-----|--------------------------------------------|-------------------------------------------------------------------------------|-----------------------------------------------------|------------------------------------------------------|--------------|------------------|----------------|-------------|-------------|--------------|------------|----------|--------------|----------|
| KCNH5 | 500 | G   | D   | NM_139318.5(KCNH5):c.1499G>A (p.Gly500Asp) | Early infantile epileptic encephalopathy with suppression bursts              | Likely benign(Last reviewed: Oct 6, 2020)           | criteria provided, single submitter                  | VCV001154530 | 14               | 62849723       | 1154530     | 1144646     | NA           | LOF        | 0.738    | 0.088        | 0.174    |
| KCNH5 | 505 | V   | I   | NM_139318.5(KCNH5):c.1513G>A (p.Val505Ile) | Early infantile epileptic encephalopathy with suppression bursts              | Uncertain significance(Last reviewed: Mar 14, 2019) | criteria provided, single submitter                  | VCV000858394 | 14               | 62849709       | 858394      | 841573      | rs1480621890 | LOF        | 0.758    | 0.123        | 0.119    |
| KCNH5 | 527 | I   | F   | NM_139318.5(KCNH5):c.1579A>T (p.Ile527Phe) | not provided Early infantile epileptic encephalopathy with suppression bursts | Uncertain significance(Last reviewed: Oct 6, 2020)  | criteria provided, multiple submitters, no conflicts | VCV000658479 | 14               | 62802572       | 658479      | 642534      | rs149561461  | LOF        | 0.732    | 0.137        | 0.131    |
| KCNH5 | 542 | R   | W   | NM_139318.5(KCNH5):c.1624C>T (p.Arg542Trp) | Early infantile epileptic encephalopathy with suppression bursts              | Uncertain significance(Last reviewed: Aug 3, 2020)  | criteria provided, single submitter                  | VCV001017233 | 14               | 62802527       | 1017233     | 1011143     | rs543742412  | LOF        | 0.703    | 0.089        | 0.208    |
| KCNH5 | 553 | L   | S   | NM_139318.5(KCNH5):c.1658T>C (p.Leu553Ser) | Early infantile epileptic encephalopathy with suppression bursts              | Uncertain significance(Last reviewed: May 21, 2019) | criteria provided, single submitter                  | VCV000530494 | 14               | 62802493       | 530494      | 528242      | rs1406117275 | LOF        | 0.767    | 0.113        | 0.12     |
| KCNH5 | 556 | D   | N   | NM_139318.5(KCNH5):c.1666G>A (p.Asp556Asn) | Early infantile epileptic encephalopathy with suppression bursts              | Uncertain significance(Last reviewed: Jun 5, 2019)  | criteria provided, single submitter                  | VCV000944554 | 14               | 62802485       | 944554      | 927111      | rs150842380  | LOF        | 0.699    | 0.082        | 0.219    |
| KCNH5 | 598 | I   | V   | NM_139318.5(KCNH5):c.1792A>G (p.Ile598Val) | Early infantile epileptic encephalopathy with suppression bursts              | Uncertain significance(Last reviewed: Jul 31, 2019) | criteria provided, single submitter                  | VCV000935009 | 14               | 62802359       | 935009      | 936647      | rs1886679317 | LOF        | 0.838    | 0.085        | 0.077    |
| KCNH5 | 616 | I   | N   | NM_139318.5(KCNH5):c.1847T>A (p.Ile616Asn) | Early infantile epileptic encephalopathy with suppression bursts              | Uncertain significance(Last reviewed: May 17, 2018) | criteria provided, single submitter                  | VCV000581723 | 14               | 62779900       | 581723      | 568955      | rs753938626  | LOF        | 0.821    | 0.105        | 0.074    |
| KCNH5 | 622 | T   | I   | NM_139318.5(KCNH5):c.1865C>T (p.Thr622Ile) | Early infantile epileptic encephalopathy with suppression bursts              | Uncertain significance(Last reviewed: Jan 24, 2020) | criteria provided, single submitter                  | VCV000838252 | 14               | 62779882       | 838252      | 841572      | rs376649352  | Neutral    | 0.613    | 0.205        | 0.181    |
| KCNH5 | 624 | A   | G   | NM_139318.5(KCNH5):c.1871C>G (p.Ala624Gly) | Early infantile epileptic encephalopathy with suppression bursts              | Uncertain significance(Last reviewed: Apr 6, 2020)  | criteria provided, single submitter                  | VCV001017242 | 14               | 62779876       | 1017242     | 1011142     | rs762614737  | LOF        | 0.724    | 0.124        | 0.152    |
| KCNH5 | 629 | N   | I   | NM_139318.5(KCNH5):c.1886A>T (p.Asn629Ile) | Early infantile epileptic encephalopathy with suppression bursts              | Uncertain significance(Last reviewed: Sep 16, 2020) | criteria provided, single submitter                  | VCV001012036 | 14               | 62779861       | 1012036     | 995890      | rs1204494580 | LOF        | 0.831    | 0.092        | 0.077    |
| KCNH5 | 643 | R   | G   | NM_139318.5(KCNH5):c.1927C>G (p.Arg643Gly) | Early infantile epileptic encephalopathy with suppression bursts              | Uncertain significance(Last reviewed: Oct 13, 2019) | criteria provided, single submitter                  | VCV000965550 | 14               | 62779820       | 965550      | 957241      | rs771984476  | LOF        | 0.745    | 0.077        | 0.178    |
| KCNH5 | 654 | T   | A   | NM_139318.5(KCNH5):c.1960A>G (p.Thr654Ala) | Early infantile epileptic encephalopathy with suppression bursts              | Benign(Last reviewed: Nov 18, 2020)                 | criteria provided, single submitter                  | VCV001164896 | 14               | 62779787       | 1164896     | 1157294     | NA           | LOF        | 0.748    | 0.087        | 0.165    |
| KCNH5 | 657 | A   | G   | NM_139318.5(KCNH5):c.1970C>G (p.Ala657Gly) | Early infantile epileptic encephalopathy with suppression bursts              | Benign(Last reviewed: Aug 10, 2020)                 | criteria provided, single submitter                  | VCV001169943 | 14               | 62779777       | 1169943     | 1157293     | NA           | LOF        | 0.787    | 0.109        | 0.104    |
| KCNH5 | 675 | I   | T   | NM_139318.5(KCNH5):c.2024T>C (p.Ile675Thr) | Early infantile epileptic encephalopathy with suppression bursts              | Uncertain significance(Last reviewed: Aug 4, 2019)  | criteria provided, single submitter                  | VCV000943234 | 14               | 62708451       | 943234      | 936646      | rs747312358  | Neutral    | 0.691    | 0.166        | 0.142    |
| KCNH5 | 690 | L   | R   | NM_139318.5(KCNH5):c.2069T>G (p.Leu690Arg) | not provided                                                                  | Uncertain significance(Last reviewed: May 20,       | criteria provided, single submitter                  | VCV001163361 | 14               | 62708406       | 1163361     | 1152567     | NA           | Neutral    | 0.645    | 0.214        | 0.142    |

| gene  | pos | aa1 | aa2 | Name                                       | Condition(s)                                                     | Clinical significance (Last reviewed)               | Review status                       | Accession    | GRCh38Chromosome | GRCh38Location | VariationID | AlleleID(s) | dbSNP ID     | prediction | prob.LOF | prob.Neutral | prob.GOF |
|-------|-----|-----|-----|--------------------------------------------|------------------------------------------------------------------|-----------------------------------------------------|-------------------------------------|--------------|------------------|----------------|-------------|-------------|--------------|------------|----------|--------------|----------|
|       |     |     |     |                                            |                                                                  | 2019)                                               |                                     |              |                  |                |             |             |              |            |          |              |          |
| KCNH5 | 691 | R   | L   | NM_139318.5(KCNH5):c.2072G>T (p.Arg691Leu) | Early infantile epileptic encephalopathy with suppression bursts | Uncertain significance(Last reviewed: Aug 4, 2020)  | criteria provided, single submitter | VCV001002329 | 14               | 62708403       | 1002329     | 995889      | rs200737420  | Neutral    | 0.502    | 0.328        | 0.17     |
| KCNH5 | 691 | R   | Q   | NM_139318.5(KCNH5):c.2072G>A (p.Arg691Gln) | Early infantile epileptic encephalopathy with suppression bursts | Uncertain significance(Last reviewed: Apr 23, 2019) | criteria provided, single submitter | VCV000845946 | 14               | 62708403       | 845946      | 841571      | rs200737420  | Neutral    | 0.519    | 0.273        | 0.208    |
| KCNH5 | 692 | Q   | R   | NM_139318.5(KCNH5):c.2075A>G (p.Gln692Arg) | Early infantile epileptic encephalopathy with suppression bursts | Uncertain significance(Last reviewed: Oct 22, 2019) | criteria provided, single submitter | VCV000958018 | 14               | 62708400       | 958018      | 948598      | rs372088477  | Neutral    | 0.523    | 0.239        | 0.237    |
| KCNH5 | 699 | S   | G   | NM_139318.5(KCNH5):c.2095A>G (p.Ser699Gly) | Early infantile epileptic encephalopathy with suppression bursts | Uncertain significance(Last reviewed: Jun 4, 2018)  | criteria provided, single submitter | VCV000569642 | 14               | 62708380       | 569642      | 568163      | rs1360641528 | Neutral    | 0.529    | 0.307        | 0.165    |
| KCNH5 | 699 | S   | R   | NM_139318.5(KCNH5):c.2097C>A (p.Ser699Arg) | Early infantile epileptic encephalopathy with suppression bursts | Likely benign(Last reviewed: Nov 10, 2020)          | criteria provided, single submitter | VCV000410375 | 14               | 62708378       | 410375      | 399834      | rs148812753  | Neutral    | 0.545    | 0.253        | 0.202    |
| KCNH5 | 705 | P   | R   | NM_139318.5(KCNH5):c.2114C>G (p.Pro705Arg) | Early infantile epileptic encephalopathy with suppression bursts | Uncertain significance(Last reviewed: Aug 21, 2016) | criteria provided, single submitter | VCV000410376 | 14               | 62708361       | 410376      | 399689      | rs1060502866 | Neutral    | 0.681    | 0.213        | 0.106    |
| KCNH5 | 718 | E   | Q   | NM_139318.5(KCNH5):c.2152G>C (p.Glu718Gln) | Early infantile epileptic encephalopathy with suppression bursts | Uncertain significance(Last reviewed: Feb 17, 2020) | criteria provided, single submitter | VCV000948838 | 14               | 62708323       | 948838      | 927110      | rs1308657380 | Neutral    | 0.516    | 0.282        | 0.202    |
| KCNH5 | 720 | R   | Q   | NM_139318.5(KCNH5):c.2159G>A (p.Arg720Gln) | Early infantile epileptic encephalopathy with suppression bursts | Uncertain significance(Last reviewed: Nov 13, 2018) | criteria provided, single submitter | VCV000658599 | 14               | 62708316       | 658599      | 642533      | rs201820912  | Neutral    | 0.509    | 0.3          | 0.191    |
| KCNH5 | 745 | A   | T   | NM_139318.5(KCNH5):c.2233G>A (p.Ala745Thr) | Early infantile epileptic encephalopathy with suppression bursts | Benign(Last reviewed: Dec 5, 2020)                  | criteria provided, single submitter | VCV001166143 | 14               | 62708242       | 1166143     | 1157292     | NA           | Neutral    | 0.526    | 0.279        | 0.195    |
| KCNH5 | 746 | S   | P   | NM_139318.5(KCNH5):c.2236T>C (p.Ser746Pro) | Early infantile epileptic encephalopathy with suppression bursts | Likely benign(Last reviewed: Jun 22, 2020)          | criteria provided, single submitter | VCV000530451 | 14               | 62708239       | 530451      | 528234      | rs34439924   | Neutral    | 0.508    | 0.294        | 0.199    |
| KCNH5 | 750 | T   | I   | NM_139318.5(KCNH5):c.2249C>T (p.Thr750Ile) | Early infantile epileptic encephalopathy with suppression bursts | Uncertain significance(Last reviewed: May 20, 2020) | criteria provided, single submitter | VCV001055057 | 14               | 62708226       | 1055057     | 1048592     | NA           | Neutral    | 0.494    | 0.344        | 0.162    |
| KCNH5 | 770 | T   | N   | NM_139318.5(KCNH5):c.2309C>A (p.Thr770Asn) | not specified                                                    | Uncertain significance(Last reviewed: Oct 8, 2015)  | criteria provided, single submitter | VCV000435550 | 14               | 62708166       | 435550      | 429583      | rs1555351942 | Neutral    | 0.511    | 0.302        | 0.187    |
| KCNH5 | 772 | E   | G   | NM_139318.5(KCNH5):c.2315A>G (p.Glu772Gly) | Early infantile epileptic encephalopathy with suppression bursts | Benign(Last reviewed: Nov 15, 2020)                 | criteria provided, single submitter | VCV000416117 | 14               | 62708160       | 416117      | 400220      | rs79913182   | Neutral    | 0.549    | 0.295        | 0.157    |
| KCNH5 | 781 | A   | T   | NM_139318.5(KCNH5):c.2341G>A (p.Ala781Thr) | Early infantile epileptic encephalopathy with suppression bursts | Uncertain significance(Last reviewed: Dec 28, 2018) | criteria provided, single submitter | VCV000641941 | 14               | 62708134       | 641941      | 642532      | rs1595587605 | Neutral    | 0.532    | 0.306        | 0.162    |
| KCNH5 | 787 | N   | S   | NM_139318.5(KCNH5):c.2360A>G (p.Asn787Ser) | Early infantile epileptic encephalopathy with suppression bursts | Uncertain significance(Last reviewed: Aug 21, 2019) | criteria provided, single submitter | VCV000849400 | 14               | 62708115       | 849400      | 841570      | rs745444217  | Neutral    | 0.519    | 0.296        | 0.185    |
| KCNH5 | 789 | G   | C   | NM_139318.5(KCNH5):c.2365G>T (p.Gly789Cys) | Early infantile epileptic encephalopathy with suppression bursts | Likely benign(Last reviewed: Jul 29, 2020)          | criteria provided, single submitter | VCV000530610 | 14               | 62708110       | 530610      | 528595      | rs140205536  | Neutral    | 0.553    | 0.299        | 0.148    |

| gene  | pos | aa1 | aa2 | Name                                       | Condition(s)                                                     | Clinical significance (Last reviewed)               | Review status                       | Accession    | GRCh38Chromosome | GRCh38Location | VariationID | AlleleID(s) | dbSNP ID     | prediction | prob.LOF | prob.Neutral | prob.GOF |
|-------|-----|-----|-----|--------------------------------------------|------------------------------------------------------------------|-----------------------------------------------------|-------------------------------------|--------------|------------------|----------------|-------------|-------------|--------------|------------|----------|--------------|----------|
| KCNH5 | 789 | G   | S   | NM_139318.5(KCNH5):c.2365G>A (p.Gly789Ser) | Early infantile epileptic encephalopathy with suppression bursts | Uncertain significance(Last reviewed: Dec 24, 2018) | criteria provided, single submitter | VCV000649223 | 14               | 62708110       | 649223      | 642531      | rs140205536  | Neutral    | 0.513    | 0.294        | 0.193    |
| KCNH5 | 791 | D   | G   | NM_139318.5(KCNH5):c.2372A>G (p.Asp791Gly) | Early infantile epileptic encephalopathy with suppression bursts | Uncertain significance(Last reviewed: Jan 12, 2018) | criteria provided, single submitter | VCV000578531 | 14               | 62708103       | 578531      | 572830      | rs548465461  | Neutral    | 0.528    | 0.304        | 0.167    |
| KCNH5 | 794 | C   | W   | NM_139318.5(KCNH5):c.2382T>G (p.Cys794Trp) | Early infantile epileptic encephalopathy with suppression bursts | Likely benign(Last reviewed: Feb 27, 2020)          | criteria provided, single submitter | VCV000953736 | 14               | 62708093       | 953736      | 948597      | rs1884478264 | Neutral    | 0.632    | 0.255        | 0.113    |
| KCNH5 | 807 | N   | S   | NM_139318.5(KCNH5):c.2420A>G (p.Asn807Ser) | Early infantile epileptic encephalopathy with suppression bursts | Uncertain significance(Last reviewed: Jul 11, 2019) | criteria provided, single submitter | VCV000950048 | 14               | 62708055       | 950048      | 927109      | rs770323761  | Neutral    | 0.486    | 0.312        | 0.203    |
| KCNH5 | 813 | R   | Q   | NM_139318.5(KCNH5):c.2438G>A (p.Arg813Gln) | Early infantile epileptic encephalopathy with suppression bursts | Uncertain significance(Last reviewed: Mar 5, 2020)  | criteria provided, single submitter | VCV000530516 | 14               | 62708037       | 530516      | 528232      | rs534607642  | Neutral    | 0.528    | 0.32         | 0.152    |
| KCNH5 | 819 | G   | V   | NM_139318.5(KCNH5):c.2456G>T (p.Gly819Val) | Early infantile epileptic encephalopathy with suppression bursts | Uncertain significance(Last reviewed: Jul 30, 2019) | criteria provided, single submitter | VCV000962145 | 14               | 62708019       | 962145      | 948596      | rs373106772  | Neutral    | 0.543    | 0.301        | 0.156    |
| KCNH5 | 830 | N   | S   | NM_139318.5(KCNH5):c.2489A>G (p.Asn830Ser) | Early infantile epileptic encephalopathy with suppression bursts | Uncertain significance(Last reviewed: Jul 23, 2019) | criteria provided, single submitter | VCV000959141 | 14               | 62707986       | 959141      | 948595      | rs151103620  | Neutral    | 0.494    | 0.311        | 0.195    |
| KCNH5 | 845 | K   | R   | NM_139318.5(KCNH5):c.2534A>G (p.Lys845Arg) | Early infantile epileptic encephalopathy with suppression bursts | Uncertain significance(Last reviewed: Jul 18, 2019) | criteria provided, single submitter | VCV000648052 | 14               | 62707941       | 648052      | 642530      | rs1189342324 | Neutral    | 0.574    | 0.271        | 0.155    |
| KCNH5 | 853 | V   | M   | NM_139318.5(KCNH5):c.2557G>A (p.Val853Met) | Early infantile epileptic encephalopathy with suppression bursts | Uncertain significance(Last reviewed: Dec 5, 2018)  | criteria provided, single submitter | VCV000665274 | 14               | 62707918       | 665274      | 642529      | rs140331213  | Neutral    | 0.613    | 0.269        | 0.118    |
| KCNH5 | 854 | T   | I   | NM_139318.5(KCNH5):c.2561C>T (p.Thr854Ile) | Early infantile epileptic encephalopathy with suppression bursts | Uncertain significance(Last reviewed: Aug 22, 2020) | criteria provided, single submitter | VCV001052180 | 14               | 62707914       | 1052180     | 1048591     | NA           | Neutral    | 0.524    | 0.334        | 0.142    |
| KCNH5 | 862 | D   | G   | NM_139318.5(KCNH5):c.2585A>G (p.Asp862Gly) | Early infantile epileptic encephalopathy with suppression bursts | Uncertain significance(Last reviewed: Oct 16, 2018) | criteria provided, single submitter | VCV000664320 | 14               | 62707890       | 664320      | 642528      | rs1595587388 | Neutral    | 0.504    | 0.327        | 0.169    |
| KCNH5 | 864 | C   | Y   | NM_139318.5(KCNH5):c.2591G>A (p.Cys864Tyr) | Early infantile epileptic encephalopathy with suppression bursts | Uncertain significance(Last reviewed: Feb 20, 2019) | criteria provided, single submitter | VCV000652298 | 14               | 62707884       | 652298      | 642527      | rs1595587379 | Neutral    | 0.611    | 0.268        | 0.122    |
| KCNH5 | 878 | A   | T   | NM_139318.5(KCNH5):c.2632G>A (p.Ala878Thr) | Early infantile epileptic encephalopathy with suppression bursts | Uncertain significance(Last reviewed: Sep 8, 2020)  | criteria provided, single submitter | VCV000461393 | 14               | 62707843       | 461393      | 464339      | rs376837885  | Neutral    | 0.495    | 0.319        | 0.186    |
| KCNH5 | 896 | H   | Y   | NM_139318.5(KCNH5):c.2686C>T (p.His896Tyr) | Early infantile epileptic encephalopathy with suppression bursts | Uncertain significance(Last reviewed: Mar 6, 2020)  | criteria provided, single submitter | VCV001014460 | 14               | 62707789       | 1014460     | 1011141     | rs758357872  | Neutral    | 0.516    | 0.342        | 0.143    |
| KCNH5 | 902 | P   | A   | NM_139318.5(KCNH5):c.2704C>G (p.Pro902Ala) | Early infantile epileptic encephalopathy with suppression bursts | Uncertain significance(Last reviewed: Mar 4, 2020)  | criteria provided, single submitter | VCV001000405 | 14               | 62707771       | 1000405     | 995888      | rs757688048  | Neutral    | 0.493    | 0.336        | 0.171    |
| KCNH5 | 928 | M   | V   | NM_139318.5(KCNH5):c.2782A>G (p.Met928Val) | Early infantile epileptic encephalopathy with suppression bursts | Uncertain significance(Last reviewed: Mar 4, 2020)  | criteria provided, single submitter | VCV000581814 | 14               | 62707693       | 581814      | 568153      | rs775247224  | Neutral    | 0.584    | 0.279        | 0.137    |

| gene  | pos | aa1 | aa2 | Name                                       | Condition(s)                                                     | Clinical significance (Last reviewed)               | Review status                                        | Accession    | GRCh38Chromosome | GRCh38Location | VariationID | AlleleID(s) | dbSNP ID     | prediction | prob.LOF | prob.Neutral | prob.GOF |
|-------|-----|-----|-----|--------------------------------------------|------------------------------------------------------------------|-----------------------------------------------------|------------------------------------------------------|--------------|------------------|----------------|-------------|-------------|--------------|------------|----------|--------------|----------|
|       |     |     |     |                                            |                                                                  | reviewed: May 11, 2018)                             | submitter                                            |              |                  |                |             |             |              |            |          |              |          |
| KCNH5 | 930 | A   | V   | NM_139318.5(KCNH5):c.2789C>T (p.Ala930Val) | not provided                                                     | Uncertain significance(Last reviewed: Nov 12, 2019) | no assertion criteria provided                       | VCV000977409 | 14               | 62707686       | 977409      | 965537      | rs562140660  | Neutral    | 0.558    | 0.273        | 0.169    |
| KCNH5 | 938 | I   | V   | NM_139318.5(KCNH5):c.2812A>G (p.Ile938Val) | Early infantile epileptic encephalopathy with suppression bursts | Uncertain significance(Last reviewed: Oct 16, 2017) | criteria provided, single submitter                  | VCV000530444 | 14               | 62707663       | 530444      | 528227      | rs375347137  | Neutral    | 0.685    | 0.205        | 0.11     |
| KCNH5 | 943 | S   | L   | NM_139318.5(KCNH5):c.2828C>T (p.Ser943Leu) | Early infantile epileptic encephalopathy with suppression bursts | Uncertain significance(Last reviewed: Oct 31, 2018) | criteria provided, multiple submitters, no conflicts | VCV000530414 | 14               | 62707647       | 530414      | 528696      | rs761523326  | Neutral    | 0.509    | 0.327        | 0.164    |
| KCNH5 | 944 | E   | K   | NM_139318.5(KCNH5):c.2830G>A (p.Glu944Lys) | Early infantile epileptic encephalopathy with suppression bursts | Benign(Last reviewed: Apr 14, 2020)                 | criteria provided, single submitter                  | VCV001170778 | 14               | 62707645       | 1170778     | 1157290     | NA           | Neutral    | 0.554    | 0.274        | 0.172    |
| KCNH5 | 945 | K   | E   | NM_139318.5(KCNH5):c.2833A>G (p.Lys945Glu) | Early infantile epileptic encephalopathy with suppression bursts | Uncertain significance(Last reviewed: Feb 5, 2018)  | criteria provided, single submitter                  | VCV000575130 | 14               | 62707642       | 575130      | 568151      | rs1566633488 | Neutral    | 0.554    | 0.285        | 0.161    |
| KCNH5 | 962 | P   | S   | NM_139318.5(KCNH5):c.2884C>T (p.Pro962Ser) | Early infantile epileptic encephalopathy with suppression bursts | Uncertain significance(Last reviewed: Mar 11, 2020) | criteria provided, single submitter                  | VCV000461394 | 14               | 62707591       | 461394      | 464333      | rs202223175  | Neutral    | 0.528    | 0.321        | 0.151    |
| KCNH5 | 964 | Q   | E   | NM_139318.5(KCNH5):c.2890C>G (p.Gln964Glu) | Early infantile epileptic encephalopathy with suppression bursts | Uncertain significance(Last reviewed: Feb 19, 2018) | criteria provided, single submitter                  | VCV000568811 | 14               | 62707585       | 568811      | 568147      | rs753525158  | Neutral    | 0.548    | 0.291        | 0.161    |
| KCNH5 | 964 | Q   | K   | NM_139318.5(KCNH5):c.2890C>A (p.Gln964Lys) | Early infantile epileptic encephalopathy with suppression bursts | Uncertain significance(Last reviewed: Dec 29, 2016) | criteria provided, single submitter                  | VCV000241863 | 14               | 62707585       | 241863      | 241853      | rs753525158  | Neutral    | 0.532    | 0.288        | 0.18     |
| KCNH5 | 976 | P   | L   | NM_139318.5(KCNH5):c.2927C>T (p.Pro976Leu) | Early infantile epileptic encephalopathy with suppression bursts | Uncertain significance(Last reviewed: Sep 3, 2020)  | criteria provided, single submitter                  | VCV001056451 | 14               | 62707548       | 1056451     | 1048590     | NA           | Neutral    | 0.551    | 0.311        | 0.138    |
| KCNH5 | 983 | K   | R   | NM_139318.5(KCNH5):c.2948A>G (p.Lys983Arg) | Early infantile epileptic encephalopathy with suppression bursts | Benign(Last reviewed: Mar 18, 2020)                 | criteria provided, single submitter                  | VCV000962491 | 14               | 62707527       | 962491      | 948594      | rs1271834396 | Neutral    | 0.595    | 0.261        | 0.144    |
| KCNH5 | 984 | D   | V   | NM_139318.5(KCNH5):c.2951A>T (p.Asp984Val) | Early infantile epileptic encephalopathy with suppression bursts | Uncertain significance(Last reviewed: Jul 5, 2018)  | criteria provided, single submitter                  | VCV000575955 | 14               | 62707524       | 575955      | 572829      | rs1566633394 | Neutral    | 0.546    | 0.308        | 0.146    |
| KCNQ1 | 1   | M   | K   | NM_000218.3(KCNQ1):c.2T>A (p.Met1Lys)      | not provided                                                     | Pathogenic(Last reviewed: Feb 3, 2016)              | criteria provided, single submitter                  | VCV000488859 | 11               | 2445100        | 488859      | 481985      | rs199473485  | Neutral    | 0.661    | 0.179        | 0.159    |
| KCNQ1 | 1   | M   | L   | NM_000218.3(KCNQ1):c.1A>T (p.Met1Leu)      | Long QT syndrome                                                 | Pathogenic(Last reviewed: Aug 2, 2016)              | criteria provided, single submitter                  | VCV000220309 | 11               | 2445099        | 220309      | 222138      | rs199473441  | Neutral    | 0.635    | 0.224        | 0.141    |
| KCNQ1 | 1   | M   | T   | NM_000218.3(KCNQ1):c.2T>C (p.Met1Thr)      | Congenital long QT syndrome                                      | not provided                                        | no assertion provided                                | VCV000053033 | 11               | 2445100        | 53033       | 67701       | rs199473485  | Neutral    | 0.628    | 0.212        | 0.16     |
| KCNQ1 | 1   | M   | V   | NM_000218.3(KCNQ1):c.1A>G (p.Met1Val)      | Congenital long QT syndrome                                      | not provided                                        | no assertion provided                                | VCV000067064 | 11               | 2445099        | 67064       | 77960       | rs199473441  | Neutral    | 0.627    | 0.226        | 0.148    |
| KCNQ1 | 2   | A   | T   | NM_000218.3(KCNQ1):c.4G>A (p.Ala2Thr)      | not provided                                                     | Uncertain significance                              | no assertion criteria provided                       | VCV001050694 | 11               | 2445102        | 1050694     | 1038052     | NA           | Neutral    | 0.536    | 0.273        | 0.191    |
| KCNQ1 | 2   | A   | V   | NM_000218.3(KCNQ1):c.5C>T (p.Ala2Val)      | Congenital long QT syndrome not provided                         | Uncertain significance(Last reviewed: May 27,       | criteria provided, single submitter                  | VCV000067091 | 11               | 2445103        | 67091       | 77987       | rs199473442  | Neutral    | 0.525    | 0.299        | 0.177    |

| gene  | pos | aa1 | aa2 | Name                                      | Condition(s)                                                                                                                               | Clinical significance (Last reviewed)                                     | Review status                                        | Accession    | GRCh38Chromosome | GRCh38Location | VariationID | AlleleID(s) | dbSNP ID     | prediction | prob.LOF | prob.Neutral | prob.GOF |
|-------|-----|-----|-----|-------------------------------------------|--------------------------------------------------------------------------------------------------------------------------------------------|---------------------------------------------------------------------------|------------------------------------------------------|--------------|------------------|----------------|-------------|-------------|--------------|------------|----------|--------------|----------|
|       |     |     |     |                                           |                                                                                                                                            | 2014)                                                                     |                                                      |              |                  |                |             |             |              |            |          |              |          |
| KCNQ1 | 3   | A   | G   | NM_000218.3(KCNQ1):c.8C>G (p.Ala3Gly)     | not provided                                                                                                                               | Uncertain significance(Last reviewed: Dec 31, 2019)                       | criteria provided, single submitter                  | VCV000200866 | 11               | 2445106        | 200866      | 197406      | rs794728543  | Neutral    | 0.616    | 0.215        | 0.169    |
| KCNQ1 | 7   | P   | S   | NM_000218.3(KCNQ1):c.19C>T (p.Pro7Ser)    | Congenital long QT syndrome not specified  Long QT syndrome 1 Long QT syndrome                                                             | Uncertain significance(Last reviewed: Sep 2, 2021)                        | criteria provided, multiple submitters, no conflicts | VCV000053028 | 11               | 2445117        | 53028       | 67696       | rs199473443  | Neutral    | 0.56     | 0.218        | 0.221    |
| KCNQ1 | 9   | R   | T   | NM_000218.3(KCNQ1):c.26G>C (p.Arg9Thr)    | Long QT syndrome 1 Jervell and Lange-Nielsen syndrome 1                                                                                    | Uncertain significance                                                    | criteria provided, single submitter                  | VCV000979113 | 11               | 2445124        | 979113      | 967192      | rs1469698360 | Neutral    | 0.556    | 0.263        | 0.181    |
| KCNQ1 | 10  | A   | D   | NM_000218.3(KCNQ1):c.29C>A (p.Ala10Asp)   | short QT syndrome Long QT syndrome Familial atrial fibrillation Congenital long QT syndrome  Jervell and Lange-Nielsen syndrome            | Uncertain significance(Last reviewed: Jun 14, 2016)                       | criteria provided, single submitter                  | VCV000304214 | 11               | 2445127        | 304214      | 326169      | rs886048161  | Neutral    | 0.612    | 0.191        | 0.197    |
| KCNQ1 | 11  | E   | K   | NM_000218.3(KCNQ1):c.31G>A (p.Glu11Lys)   | not provided Cardiovascular phenotype                                                                                                      | Conflicting interpretations of pathogenicity(Last reviewed: Aug 12, 2019) | criteria provided, conflicting interpretations       | VCV000418271 | 11               | 2445129        | 418271      | 408324      | rs959449103  | Neutral    | 0.559    | 0.227        | 0.213    |
| KCNQ1 | 13  | K   | R   | NM_000218.3(KCNQ1):c.38A>G (p.Lys13Arg)   | Long QT syndrome                                                                                                                           | Uncertain significance(Last reviewed: Feb 13, 2018)                       | criteria provided, single submitter                  | VCV000405256 | 11               | 2445136        | 405256      | 398459      | rs1060500622 | Neutral    | 0.56     | 0.233        | 0.207    |
| KCNQ1 | 14  | R   | C   | NM_000218.3(KCNQ1):c.40C>T (p.Arg14Cys)   | not provided                                                                                                                               | not provided                                                              | no assertion provided                                | VCV000067071 | 11               | 2445138        | 67071       | 77967       | rs199473444  | Neutral    | 0.59     | 0.263        | 0.147    |
| KCNQ1 | 14  | R   | L   | NM_000218.3(KCNQ1):c.41G>T (p.Arg14Leu)   | Long QT syndrome not provided Long QT syndrome 1 Jervell and Lange-Nielsen syndrome 1 Atrial fibrillation, familial, 3 Short QT syndrome 2 | Uncertain significance(Last reviewed: Aug 2, 2020)                        | criteria provided, multiple submitters, no conflicts | VCV000804969 | 11               | 2445139        | 804969      | 793392      | rs1424013094 | Neutral    | 0.507    | 0.328        | 0.165    |
| KCNQ1 | 22  | G   | R   | NM_000218.3(KCNQ1):c.64G>C (p.Gly22Arg)   | Long QT syndrome not provided                                                                                                              | Uncertain significance(Last reviewed: Aug 8, 2018)                        | criteria provided, multiple submitters, no conflicts | VCV000200868 | 11               | 2445162        | 200868      | 197408      | rs794728545  | GOF        | 0.611    | 0.148        | 0.241    |
| KCNQ1 | 24  | R   | W   | NM_000218.3(KCNQ1):c.70C>T (p.Arg24Trp)   | Long QT syndrome                                                                                                                           | Uncertain significance(Last reviewed: Apr 24, 2019)                       | criteria provided, single submitter                  | VCV000946105 | 11               | 2445168        | 946105      | 926181      | rs990778345  | Neutral    | 0.579    | 0.266        | 0.155    |
| KCNQ1 | 25  | R   | P   | NM_000218.3(KCNQ1):c.74G>C (p.Arg25Pro)   | Conduction disorder of the heart                                                                                                           | Uncertain significance                                                    | criteria provided, single submitter                  | VCV000684795 | 11               | 2445172        | 684795      | 672417      | rs1589884210 | Neutral    | 0.578    | 0.246        | 0.176    |
| KCNQ1 | 27  | S   | R   | NM_000218.3(KCNQ1):c.81C>A (p.Ser27Arg)   | not provided                                                                                                                               | Uncertain significance(Last reviewed: May 7, 2014)                        | criteria provided, single submitter                  | VCV000200869 | 11               | 2445179        | 200869      | 197409      | rs794728546  | Neutral    | 0.558    | 0.189        | 0.254    |
| KCNQ1 | 28  | A   | G   | NM_000218.3(KCNQ1):c.83C>G (p.Ala28Gly)   | Long QT syndrome                                                                                                                           | Uncertain significance(Last reviewed: Oct 18, 2020)                       | criteria provided, single submitter                  | VCV001036317 | 11               | 2445181        | 1036317     | 1030169     | rs767089696  | Neutral    | 0.559    | 0.247        | 0.194    |
| KCNQ1 | 35  | P   | L   | NM_000218.3(KCNQ1):c.104C>T (p.Pro35Leu)  | Long QT syndrome                                                                                                                           | Uncertain significance(Last reviewed: Feb 10, 2020)                       | criteria provided, single submitter                  | VCV000840373 | 11               | 2445202        | 840373      | 838232      | rs1373379406 | Neutral    | 0.506    | 0.303        | 0.191    |
| KCNQ1 | 39  | F   | V   | NM_000218.3(KCNQ1):c.496T>G (p.Phe166Val) | Long QT syndrome                                                                                                                           | Uncertain significance(Last reviewed: Dec 3, 2019)                        | criteria provided, single submitter                  | VCV000846376 | 11               | 2570646        | 846376      | 838233      | rs768419064  | Neutral    | 0.487    | 0.346        | 0.167    |

| gene  | pos | aa1 | aa2 | Name                                      | Condition(s)                                                                                                 | Clinical significance (Last reviewed)               | Review status                                        | Accession    | GRCh38Chromosome | GRCh38Location | VariationID | AlleleID(s) | dbSNP ID     | prediction | prob.LOF | prob.Neutral | prob.GOF |
|-------|-----|-----|-----|-------------------------------------------|--------------------------------------------------------------------------------------------------------------|-----------------------------------------------------|------------------------------------------------------|--------------|------------------|----------------|-------------|-------------|--------------|------------|----------|--------------|----------|
| KCNQ1 | 45  | P   | R   | NM_000218.3(KCNQ1):c.134C>G (p.Pro45Arg)  | not provided                                                                                                 | Uncertain significance(Last reviewed: Jul 2, 2020)  | criteria provided, single submitter                  | VCV001312976 | 11               | 2445232        | 1312976     | 1303237     | NA           | Neutral    | 0.609    | 0.168        | 0.224    |
| KCNQ1 | 45  | V   | L   | NM_000218.3(KCNQ1):c.514G>C (p.Val172Leu) | Long QT syndrome                                                                                             | Uncertain significance(Last reviewed: Aug 6, 2018)  | criteria provided, single submitter                  | VCV000653086 | 11               | 2570664        | 653086      | 639902      | rs199472694  | Neutral    | 0.569    | 0.266        | 0.165    |
| KCNQ1 | 46  | A   | T   | NM_000218.3(KCNQ1):c.136G>A (p.Ala46Thr)  | not provided Cardiovascular phenotype not specified Congenital long QT syndrome Long QT syndrome 1           | Uncertain significance(Last reviewed: Sep 6, 2018)  | criteria provided, multiple submitters, no conflicts | VCV000052982 | 11               | 2445234        | 52982       | 67650       | rs199473671  | Neutral    | 0.432    | 0.395        | 0.173    |
| KCNQ1 | 48  | L   | P   | NM_000218.3(KCNQ1):c.524T>C (p.Leu175Pro) | Long QT syndrome                                                                                             | Uncertain significance(Last reviewed: Dec 18, 2018) | criteria provided, single submitter                  | VCV000644915 | 11               | 2570674        | 644915      | 639903      | rs1589956588 | Neutral    | 0.545    | 0.272        | 0.183    |
| KCNQ1 | 57  | G   | D   | NM_000218.3(KCNQ1):c.170G>A (p.Gly57Asp)  | Long QT syndrome                                                                                             | Uncertain significance(Last reviewed: Jan 31, 2020) | criteria provided, single submitter                  | VCV001057004 | 11               | 2445268        | 1057004     | 1047158     | NA           | Neutral    | 0.63     | 0.154        | 0.216    |
| KCNQ1 | 57  | G   | V   | NM_000218.3(KCNQ1):c.170G>T (p.Gly57Val)  | Congenital long QT syndrome                                                                                  | not provided                                        | no assertion provided                                | VCV000067051 | 11               | 2445268        | 67051       | 77947       | rs199473445  | Neutral    | 0.578    | 0.214        | 0.208    |
| KCNQ1 | 58  | V   | L   | NM_000218.3(KCNQ1):c.553G>C (p.Val185Leu) | Arrhythmialong QT syndrome                                                                                   | Uncertain significance(Last reviewed: Apr 13, 2021) | criteria provided, multiple submitters, no conflicts | VCV001044083 | 11               | 2570703        | 1044083     | 1030173     | rs749351255  | Neutral    | 0.548    | 0.277        | 0.175    |
| KCNQ1 | 59  | P   | A   | NM_000218.3(KCNQ1):c.175C>G (p.Pro59Ala)  | Cardiovascular phenotype                                                                                     | Uncertain significance(Last reviewed: Nov 27, 2017) | criteria provided, single submitter                  | VCV000518877 | 11               | 2445273        | 518877      | 510270      | rs1554958059 | Neutral    | 0.565    | 0.233        | 0.202    |
| KCNQ1 | 61  | P   | T   | NM_000218.3(KCNQ1):c.181C>A (p.Pro61Thr)  | not specified not provided                                                                                   | Uncertain significance(Last reviewed: Aug 16, 2019) | criteria provided, multiple submitters, no conflicts | VCV000517627 | 11               | 2445279        | 517627      | 497616      | rs1273257287 | Neutral    | 0.54     | 0.231        | 0.229    |
| KCNQ1 | 62  | A   | T   | NM_000218.3(KCNQ1):c.184G>A (p.Ala62Thr)  | not specified                                                                                                | Likely benign(Last reviewed: Dec 17, 2013)          | criteria provided, single submitter                  | VCV000200880 | 11               | 2445282        | 200880      | 197411      | rs794728554  | Neutral    | 0.516    | 0.244        | 0.239    |
| KCNQ1 | 63  | P   | S   | NM_000218.3(KCNQ1):c.187C>T (p.Pro63Ser)  | Long QT syndrome                                                                                             | Uncertain significance(Last reviewed: Jan 21, 2020) | criteria provided, single submitter                  | VCV001058075 | 11               | 2445285        | 1058075     | 1047159     | NA           | Neutral    | 0.555    | 0.222        | 0.223    |
| KCNQ1 | 63  | P   | T   | NM_000218.3(KCNQ1):c.187C>A (p.Pro63Thr)  | Atrial fibrillation, familial, 3 Short QT syndrome 2 Long QT syndrome 1 Jervell and Lange-Nielsen syndrome 1 | Uncertain significance(Last reviewed: Jan 13, 2018) | criteria provided, single submitter                  | VCV000879571 | 11               | 2445285        | 879571      | 867802      | rs1280717988 | Neutral    | 0.54     | 0.238        | 0.222    |
| KCNQ1 | 64  | P   | S   | NM_000218.3(KCNQ1):c.190C>T (p.Pro64Ser)  | not provided                                                                                                 | Uncertain significance(Last reviewed: Jan 31, 2020) | criteria provided, multiple submitters, no conflicts | VCV000502107 | 11               | 2445288        | 502107      | 493531      | rs1554958062 | Neutral    | 0.551    | 0.214        | 0.235    |
| KCNQ1 | 65  | R   | C   | NM_000218.3(KCNQ1):c.574C>T (p.Arg192Cys) | Arrhythmia not specified Long QT syndrome                                                                    | Uncertain significance(Last reviewed: Nov 17, 2020) | criteria provided, multiple submitters, no conflicts | VCV000578178 | 11               | 2570724        | 578178      | 567156      | rs775059928  | Neutral    | 0.607    | 0.238        | 0.154    |
| KCNQ1 | 66  | S   | F   | NM_000218.3(KCNQ1):c.197C>T (p.Ser66Phe)  | Long QT syndrome Congenital long QT syndrome                                                                 | Uncertain significance(Last reviewed: Nov 7, 2019)  | criteria provided, single submitter                  | VCV000067063 | 11               | 2445295        | 67063       | 77959       | rs199473446  | Neutral    | 0.514    | 0.291        | 0.195    |



| gene  | pos | aa1 | aa2 | Name                                      | Condition(s)                                                                                                               | Clinical significance (Last reviewed)               | Review status                                        | Accession    | GRCh38Chromosome | GRCh38Location | VariationID | AlleleID(s) | dbSNP ID     | prediction | prob.LOF | prob.Neutral | prob.GOF |
|-------|-----|-----|-----|-------------------------------------------|----------------------------------------------------------------------------------------------------------------------------|-----------------------------------------------------|------------------------------------------------------|--------------|------------------|----------------|-------------|-------------|--------------|------------|----------|--------------|----------|
| KCNQ1 | 66  | S   | Y   | NM_000218.3(KCNQ1):c.197C>A (p.Ser66Tyr)  | Long QT syndrome                                                                                                           | Uncertain significance(Last reviewed: Oct 16, 2019) | criteria provided, single submitter                  | VCV000933445 | 11               | 2445295        | 933445      | 935468      | rs199473446  | Neutral    | 0.507    | 0.274        | 0.219    |
| KCNQ1 | 70  | P   | T   | NM_000218.3(KCNQ1):c.208C>A (p.Pro70Thr)  | not provided                                                                                                               | Uncertain significance(Last reviewed: Jan 29, 2013) | criteria provided, single submitter                  | VCV000200871 | 11               | 2445306        | 200871      | 197413      | rs794728548  | Neutral    | 0.489    | 0.3          | 0.211    |
| KCNQ1 | 73  | P   | T   | NM_000218.3(KCNQ1):c.217C>A (p.Pro73Thr)  | Short QT syndrome 2 not provided  Cardiovascular phenotype Congenital long QT syndrome Long QT syndrome 1 Long QT syndrome | Uncertain significance(Last reviewed: Jun 2, 2021)  | criteria provided, multiple submitters, no conflicts | VCV000053031 | 11               | 2445315        | 53031       | 67699       | rs199472676  | Neutral    | 0.536    | 0.24         | 0.224    |
| KCNQ1 | 77  | S   | F   | NM_000218.3(KCNQ1):c.230C>T (p.Ser77Phe)  | not provided Long QT syndrome                                                                                              | Uncertain significance(Last reviewed: Mar 24, 2021) | criteria provided, multiple submitters, no conflicts | VCV000451983 | 11               | 2445328        | 451983      | 444781      | rs774349962  | Neutral    | 0.484    | 0.317        | 0.199    |
| KCNQ1 | 78  | D   | A   | NM_000218.3(KCNQ1):c.233A>C (p.Asp78Ala)  | Long QT syndrome                                                                                                           | Uncertain significance(Last reviewed: Aug 19, 2019) | criteria provided, single submitter                  | VCV000943522 | 11               | 2445331        | 943522      | 935469      | rs1846021008 | Neutral    | 0.488    | 0.314        | 0.199    |
| KCNQ1 | 78  | D   | H   | NM_000218.3(KCNQ1):c.232G>C (p.Asp78His)  | Long QT syndrome                                                                                                           | Uncertain significance(Last reviewed: Oct 3, 2020)  | criteria provided, single submitter                  | VCV001060673 | 11               | 2445330        | 1060673     | 1047160     | NA           | Neutral    | 0.494    | 0.305        | 0.201    |
| KCNQ1 | 80  | G   | A   | NM_000218.3(KCNQ1):c.239G>C (p.Gly80Ala)  | Long QT syndrome                                                                                                           | Uncertain significance(Last reviewed: Aug 27, 2019) | criteria provided, single submitter                  | VCV000960512 | 11               | 2445337        | 960512      | 947393      | rs1846021110 | Neutral    | 0.593    | 0.192        | 0.215    |
| KCNQ1 | 81  | P   | L   | NM_000218.3(KCNQ1):c.242C>T (p.Pro81Leu)  | not provided                                                                                                               | Uncertain significance(Last reviewed: Oct 15, 2018) | criteria provided, single submitter                  | VCV000200875 | 11               | 2445340        | 200875      | 197414      | rs771921468  | Neutral    | 0.566    | 0.253        | 0.182    |
| KCNQ1 | 83  | M   | I   | NM_000218.3(KCNQ1):c.630G>A (p.Met210Ile) | Arrhythmia                                                                                                                 | Uncertain significance(Last reviewed: Oct 18, 2019) | criteria provided, single submitter                  | VCV000923241 | 11               | 2571350        | 923241      | 911559      | rs776811872  | Neutral    | 0.363    | 0.495        | 0.141    |
| KCNQ1 | 83  | P   | S   | NM_000218.3(KCNQ1):c.247C>T (p.Pro83Ser)  | Long QT syndrome                                                                                                           | Uncertain significance(Last reviewed: Aug 20, 2020) | criteria provided, single submitter                  | VCV001040957 | 11               | 2445345        | 1040957     | 1030170     | rs772821418  | Neutral    | 0.514    | 0.316        | 0.17     |
| KCNQ1 | 84  | P   | R   | NM_000218.3(KCNQ1):c.251C>G (p.Pro84Arg)  | not provided                                                                                                               | Uncertain significance(Last reviewed: Jan 11, 2013) | criteria provided, single submitter                  | VCV000200876 | 11               | 2445349        | 200876      | 197415      | rs794728551  | Neutral    | 0.582    | 0.184        | 0.234    |
| KCNQ1 | 84  | P   | S   | NM_000218.3(KCNQ1):c.250C>T (p.Pro84Ser)  | Long QT syndrome                                                                                                           | Uncertain significance(Last reviewed: Feb 7, 2020)  | criteria provided, single submitter                  | VCV000948475 | 11               | 2445348        | 948475      | 926182      | rs1846021360 | Neutral    | 0.535    | 0.277        | 0.188    |
| KCNQ1 | 92  | S   | C   | NM_000218.3(KCNQ1):c.275C>G (p.Ser92Cys)  | not provided                                                                                                               | Uncertain significance(Last reviewed: Jan 16, 2019) | criteria provided, single submitter                  | VCV001211571 | 11               | 2445373        | 1211571     | 1201568     | NA           | Neutral    | 0.506    | 0.326        | 0.168    |
| KCNQ1 | 92  | S   | P   | NM_000218.3(KCNQ1):c.274T>C (p.Ser92Pro)  | Long QT syndrome                                                                                                           | Uncertain significance(Last reviewed: Apr 2, 2018)  | criteria provided, single submitter                  | VCV000577361 | 11               | 2445372        | 577361      | 565633      | rs764455359  | Neutral    | 0.415    | 0.407        | 0.179    |
| KCNQ1 | 95  | S   | R   | NM_000218.3(KCNQ1):c.285C>A (p.Ser95Arg)  | not specified                                                                                                              | Uncertain significance(Last reviewed: Jul 3, 2018)  | criteria provided, single submitter                  | VCV000666842 | 11               | 2445383        | 666842      | 654676      | rs1589884451 | Neutral    | 0.565    | 0.22         | 0.215    |

| gene  | pos | aa1 | aa2 | Name                                               | Condition(s)                                                                                                                                                            | Clinical significance (Last reviewed)                                     | Review status                                        | Accession    | GRCh38Chromosome | GRCh38Location    | VariationID | AlleleID(s) | dbSNP ID     | prediction | prob.LOF | prob.Neutral | prob.GOF |
|-------|-----|-----|-----|----------------------------------------------------|-------------------------------------------------------------------------------------------------------------------------------------------------------------------------|---------------------------------------------------------------------------|------------------------------------------------------|--------------|------------------|-------------------|-------------|-------------|--------------|------------|----------|--------------|----------|
| KCNQ1 | 96  | T   | R   | NM_000218.3(KCNQ1):c.287C>G (p.Thr96Arg)           | Long QT syndrome 1                                                                                                                                                      | Likely pathogenic(Last reviewed: Jan 1, 2019)                             | criteria provided, single submitter                  | VCV000983021 | 11               | 2445385           | 983021      | 970932      | rs1337409061 | Neutral    | 0.461    | 0.33         | 0.209    |
| KCNQ1 | 99  | P   | R   | NM_000218.3(KCNQ1):c.296C>G (p.Pro99Arg)           | not provided Long QT syndrome 1 Beckwith-Wiedemann syndrome Jervell and Lange-Nielsen syndrome 1 Atrial fibrillation, familial, 3  Short QT syndrome 2 Long QT syndrome | Uncertain significance(Last reviewed: Sep 24, 2020)                       | criteria provided, multiple submitters, no conflicts | VCV000200877 | 11               | 2445394           | 200877      | 197416      | rs370435862  | LOF        | 0.684    | 0.137        | 0.179    |
| KCNQ1 | 100 | I   | L   | NM_000218.3(KCNQ1):c.679A>C (p.Ile227Leu)          | not provided                                                                                                                                                            | Likely pathogenic(Last reviewed: Aug 10, 2012)                            | criteria provided, single submitter                  | VCV000200819 | 11               | 2571399           | 200819      | 197439      | rs794728511  | Neutral    | 0.368    | 0.479        | 0.153    |
| KCNQ1 | 104 | R   | L   | NM_000218.3(KCNQ1):c.692G>T (p.Arg231Leu)          | Cardiovascular phenotype                                                                                                                                                | Likely pathogenic(Last reviewed: Jun 15, 2016)                            | criteria provided, single submitter                  | VCV000519257 | 11               | 2572021           | 519257      | 510274      | rs199472709  | Neutral    | 0.543    | 0.211        | 0.246    |
| KCNQ1 | 104 | R   | S   | NM_000218.3(KCNQ1):c.691C>A (p.Arg231Ser)          | not provided                                                                                                                                                            | Pathogenic(Last reviewed: Aug 13, 2019)                                   | criteria provided, single submitter                  | VCV000280173 | 11               | 2572020           | 280173      | 264532      | rs199473457  | Neutral    | 0.559    | 0.25         | 0.191    |
| KCNQ1 | 105 | H   | L   | NM_000218.3(KCNQ1):c.314A>T (p.His105Leu)          | Congenital long QT syndrome                                                                                                                                             | not provided                                                              | no assertion provided                                | VCV000067065 | 11               | 2445412           | 67065       | 77961       | rs199473447  | Neutral    | 0.474    | 0.257        | 0.27     |
| KCNQ1 | 106 | L   | P   | NM_000218.3(KCNQ1):c.698T>C (p.Leu233Pro)          | not provided                                                                                                                                                            | Conflicting interpretations of pathogenicity(Last reviewed: Jun 15, 2020) | criteria provided, conflicting interpretations       | VCV000993829 | 11               | 2572027           | 993829      | 981737      | rs780236727  | Neutral    | 0.554    | 0.329        | 0.117    |
| KCNQ1 | 106 | V   | D   | NM_000218.3(KCNQ1):c.317T>A (p.Val106Asp)          | Long QT syndrome                                                                                                                                                        | Uncertain significance(Last reviewed: Apr 12, 2018)                       | criteria provided, single submitter                  | VCV000573930 | 11               | 2445415           | 573930      | 570472      | rs1565023268 | Neutral    | 0.689    | 0.189        | 0.123    |
| KCNQ1 | 107 | Q   | H   | NM_000218.3(KCNQ1):c.321G>T (p.Gln107His)          | Long QT syndrome 1                                                                                                                                                      | Likely pathogenic(Last reviewed: Jan 9, 2018)                             | criteria provided, single submitter                  | VCV000200878 | 11               | 2445419           | 200878      | 197417      | rs1554958092 | LOF        | 0.81     | 0.081        | 0.109    |
| KCNQ1 | 107 | Q   | L   | NM_000218.3(KCNQ1):c.701A>T (p.Gln234Leu)          | Long QT syndrome                                                                                                                                                        | Uncertain significance(Last reviewed: Dec 17, 2016)                       | criteria provided, single submitter                  | VCV000405267 | 11               | 2572030           | 405267      | 398593      | rs794728570  | GOF        | 0.672    | 0.082        | 0.246    |
| KCNQ1 | 107 | Q   | P   | NM_000218.3(KCNQ1):c.701A>C (p.Gln234Pro)          | not provided                                                                                                                                                            | Likely pathogenic(Last reviewed: Aug 14, 2019)                            | criteria provided, single submitter                  | VCV000200896 | 11               | 2572030           | 200896      | 197440      | rs794728570  | LOF        | 0.773    | 0.105        | 0.121    |
| KCNQ1 | 107 | Q   | R   | NM_000218.3(KCNQ1):c.701A>G (p.Gln234Arg)          | Long QT syndrome                                                                                                                                                        | Uncertain significance(Last reviewed: Aug 31, 2015)                       | criteria provided, single submitter                  | VCV000220083 | 11               | 2572030           | 220083      | 222139      | rs794728570  | LOF        | 0.828    | 0.072        | 0.1      |
| KCNQ1 | 109 | L   | P   | NM_000218.3(KCNQ1):c.707T>C (p.Leu236Pro)          | not provided Long QT syndrome 1                                                                                                                                         | Pathogenic/Likely pathogenic(Last reviewed: Apr 17, 2019)                 | criteria provided, multiple submitters, no conflicts | VCV000200820 | 11               | 2572036           | 200820      | 197441      | rs794728512  | Neutral    | 0.605    | 0.283        | 0.112    |
| KCNQ1 | 109 | L   | R   | NM_000218.3(KCNQ1):c.707T>G (p.Leu236Arg)          | not provided                                                                                                                                                            | Likely pathogenic(Last reviewed: Mar 27, 2015)                            | criteria provided, single submitter                  | VCV000200897 | 11               | 2572036           | 200897      | 197442      | rs794728512  | Neutral    | 0.734    | 0.162        | 0.104    |
| KCNQ1 | 110 | V   | E   | NM_000218.3(KCNQ1):c.329_330delinsAG (p.Val110Glu) | Long QT syndrome                                                                                                                                                        | Uncertain significance(Last reviewed: Jul 21, 2020)                       | criteria provided, single submitter                  | VCV001020240 | 11               | 2445427 - 2445428 | 1020240     | 1009621     | rs1846023075 | LOF        | 0.76     | 0.121        | 0.119    |
| KCNQ1 | 110 | V   | I   | NM_000218.3(KCNQ1):c.328G>A (p.Val110Ile)          | not provided Long QT syndrome not specified                                                                                                                             | Conflicting                                                               | criteria                                             | VCV000053034 | 11               | 2445426           | 53034       | 67702       | rs199472677  | Neutral    | 0.626    | 0.25         | 0.124    |

| gene  | pos | aa1 | aa2 | Name                                               | Condition(s)                                                     | Clinical significance (Last reviewed)                                      | Review status                                        | Accession    | GRCh38Chromosome | GRCh38Location    | VariationID | AlleleID(s) | dbSNP ID     | prediction | prob.LOF | prob.Neutral | prob.GOF |
|-------|-----|-----|-----|----------------------------------------------------|------------------------------------------------------------------|----------------------------------------------------------------------------|------------------------------------------------------|--------------|------------------|-------------------|-------------|-------------|--------------|------------|----------|--------------|----------|
|       |     |     |     |                                                    |                                                                  | interpretations of pathogenicity (Last reviewed: Sep 17, 2020)             | provided, conflicting interpretations                |              |                  |                   |             |             |              |            |          |              |          |
| KCNQ1 | 111 | Y   | C   | NM_000218.3(KCNQ1):c.332A>G (p.Tyr111Cys)          | not provided Congenital long QT syndrome                         | Pathogenic (Last reviewed: Jul 26, 2017)                                   | criteria provided, single submitter                  | VCV000053035 | 11               | 2445430           | 53035       | 67703       | rs199472678  | LOF        | 0.854    | 0.042        | 0.104    |
| KCNQ1 | 113 | H   | R   | NM_000218.3(KCNQ1):c.719A>G (p.His240Arg)          | Arrhythmia                                                       | Uncertain significance (Last reviewed: Feb 19, 2021)                       | criteria provided, single submitter                  | VCV001171337 | 11               | 2572048           | 1171337     | 1160869     | NA           | LOF        | 0.792    | 0.09         | 0.118    |
| KCNQ1 | 114 | L   | P   | NM_000218.3(KCNQ1):c.341T>C (p.Leu114Pro)          | Congenital long QT syndrome Long QT syndrome                     | Likely pathogenic (Last reviewed: May 15, 2017)                            | criteria provided, single submitter                  | VCV000053036 | 11               | 2445439           | 53036       | 67704       | rs199473448  | Neutral    | 0.729    | 0.169        | 0.103    |
| KCNQ1 | 114 | V   | F   | NM_000218.3(KCNQ1):c.721G>T (p.Val241Phe)          | Long QT syndrome                                                 | Uncertain significance (Last reviewed: May 15, 2016)                       | criteria provided, single submitter                  | VCV000405255 | 11               | 2572050           | 405255      | 398149      | rs199956744  | LOF        | 0.728    | 0.14         | 0.133    |
| KCNQ1 | 114 | V   | I   | NM_000218.3(KCNQ1):c.721G>A (p.Val241Ile)          | not provided Long QT syndrome                                    | Uncertain significance (Last reviewed: Oct 3, 2019)                        | criteria provided, multiple submitters, no conflicts | VCV000191477 | 11               | 2572050           | 191477      | 189329      | rs199956744  | Neutral    | 0.679    | 0.208        | 0.114    |
| KCNQ1 | 115 | E   | G   | NM_000218.3(KCNQ1):c.344A>G (p.Glu115Gly)          | Long QT syndrome Congenital long QT syndrome                     | Uncertain significance (Last reviewed: Jul 30, 2020)                       | criteria provided, single submitter                  | VCV000053037 | 11               | 2445442           | 53037       | 67705       | rs199472679  | LOF        | 0.816    | 0.087        | 0.097    |
| KCNQ1 | 115 | E   | K   | NM_000218.3(KCNQ1):c.343G>A (p.Glu115Lys)          | not provided                                                     | Pathogenic (Last reviewed: Sep 10, 2013)                                   | criteria provided, single submitter                  | VCV000200879 | 11               | 2445441           | 200879      | 197418      | rs794728553  | LOF        | 0.815    | 0.088        | 0.097    |
| KCNQ1 | 116 | R   | H   | NM_000218.3(KCNQ1):c.347G>A (p.Arg116His)          | not specified                                                    | Uncertain significance (Last reviewed: Feb 26, 2015)                       | criteria provided, single submitter                  | VCV000178873 | 11               | 2445445           | 178873      | 175698      | rs727504506  | LOF        | 0.768    | 0.111        | 0.121    |
| KCNQ1 | 117 | P   | L   | NM_000218.3(KCNQ1):c.350C>T (p.Pro117Leu)          | Long QT syndrome Long QT syndrome 1  Congenital long QT syndrome | Uncertain significance (Last reviewed: Sep 25, 2020)                       | criteria provided, single submitter                  | VCV000003141 | 11               | 2445448           | 3141        | 18180       | rs120074191  | LOF        | 0.855    | 0.036        | 0.109    |
| KCNQ1 | 117 | P   | S   | NM_000218.3(KCNQ1):c.349C>T (p.Pro117Ser)          | Long QT syndrome 1                                               | Likely pathogenic (Last reviewed: Jan 1, 2016)                             | criteria provided, single submitter                  | VCV000254159 | 11               | 2445447           | 254159      | 248631      | rs886037906  | LOF        | 0.894    | 0.025        | 0.08     |
| KCNQ1 | 119 | G   | D   | NM_000218.3(KCNQ1):c.356G>A (p.Gly119Asp)          | not provided                                                     | not provided                                                               | no assertion provided                                | VCV000067066 | 11               | 2445454           | 67066       | 77962       | rs199472680  | LOF        | 0.875    | 0.044        | 0.081    |
| KCNQ1 | 119 | G   | R   | NM_000218.3(KCNQ1):c.355G>C (p.Gly119Arg)          | Long QT syndrome 1 Long QT syndrome                              | Conflicting interpretations of pathogenicity (Last reviewed: Apr 12, 2018) | criteria provided, conflicting interpretations       | VCV000560702 | 11               | 2445453           | 560702      | 551782      | rs1325525794 | LOF        | 0.857    | 0.045        | 0.097    |
| KCNQ1 | 119 | G   | V   | NM_000218.3(KCNQ1):c.356G>T (p.Gly119Val)          | Long QT syndrome                                                 | Uncertain significance (Last reviewed: Aug 8, 2014)                        | criteria provided, single submitter                  | VCV001037209 | 11               | 2445454           | 1037209     | 1030171     | rs199472680  | LOF        | 0.857    | 0.051        | 0.092    |
| KCNQ1 | 121 | W   | F   | NM_000218.3(KCNQ1):c.743_744delinsTC (p.Trp248Phe) | Jervell and Lange-Nielsen syndrome 1                             | not provided                                                               | no assertion provided                                | VCV000053093 | 11               | 2572072 - 2572073 | 53093       | 67761       | rs397508123  | LOF        | 0.73     | 0.145        | 0.125    |
| KCNQ1 | 122 | C   | Y   | NM_000218.3(KCNQ1):c.365G>A (p.Cys122Tyr)          | not provided Congenital long QT syndrome Long QT syndrome        | Conflicting interpretations of pathogenicity (Last reviewed: Apr 25, 2019) | criteria provided, conflicting interpretations       | VCV000053039 | 11               | 2445463           | 53039       | 67707       | rs199472681  | LOF        | 0.76     | 0.037        | 0.202    |

| gene  | pos | aa1 | aa2 | Name                                      | Condition(s)                                 | Clinical significance (Last reviewed)                                     | Review status                                  | Accession    | GRCh38Chromosome | GRCh38Location | VariationID | AlleleID(s) | dbSNP ID     | prediction | prob.LOF | prob.Neutral | prob.GOF |
|-------|-----|-----|-----|-------------------------------------------|----------------------------------------------|---------------------------------------------------------------------------|------------------------------------------------|--------------|------------------|----------------|-------------|-------------|--------------|------------|----------|--------------|----------|
| KCNQ1 | 124 | L   | Q   | NM_000218.3(KCNQ1):c.752T>A (p.Leu251Gln) | Long QT syndrome                             | Uncertain significance(Last reviewed: May 12, 2020)                       | criteria provided, single submitter            | VCV001004846 | 11               | 2572081        | 1004846     | 994445      | rs199472716  | LOF        | 0.803    | 0.114        | 0.083    |
| KCNQ1 | 125 | Y   | C   | NM_000218.3(KCNQ1):c.374A>G (p.Tyr125Cys) | not provided                                 | Likely pathogenic(Last reviewed: Sep 2, 2015)                             | criteria provided, single submitter            | VCV000429656 | 11               | 2445472        | 429656      | 421849      | rs1131691513 | LOF        | 0.835    | 0.034        | 0.132    |
| KCNQ1 | 125 | Y   | D   | NM_000218.3(KCNQ1):c.373T>G (p.Tyr125Asp) | not provided                                 | Likely pathogenic(Last reviewed: Jan 12, 2012)                            | criteria provided, single submitter            | VCV000200910 | 11               | 2445471        | 200910      | 197420      | rs794728578  | LOF        | 0.873    | 0.023        | 0.105    |
| KCNQ1 | 125 | Y   | N   | NM_000218.3(KCNQ1):c.373T>A (p.Tyr125Asn) | Long QT syndrome                             | Likely pathogenic                                                         | criteria provided, single submitter            | VCV000684802 | 11               | 2445471        | 684802      | 672418      | rs794728578  | LOF        | 0.853    | 0.034        | 0.112    |
| KCNQ1 | 126 | H   | L   | NM_000218.3(KCNQ1):c.377A>T (p.His126Leu) | Long QT syndrome not provided                | Conflicting interpretations of pathogenicity(Last reviewed: Oct 6, 2017)  | criteria provided, conflicting interpretations | VCV000200911 | 11               | 2445475        | 200911      | 197421      | rs794728579  | GOF        | 0.611    | 0.122        | 0.267    |
| KCNQ1 | 126 | S   | A   | NM_000218.3(KCNQ1):c.757T>G (p.Ser253Ala) | Arrhythmia                                   | Uncertain significance(Last reviewed: Apr 20, 2021)                       | criteria provided, single submitter            | VCV000924383 | 11               | 2572086        | 924383      | 911565      | rs764781840  | GOF        | 0.5      | 0.236        | 0.264    |
| KCNQ1 | 126 | S   | C   | NM_000218.3(KCNQ1):c.758C>G (p.Ser253Cys) | Long QT syndrome 1                           | Pathogenic(Last reviewed: Jan 1, 2014)                                    | criteria provided, single submitter            | VCV000207971 | 11               | 2572087        | 207971      | 204199      | rs794728513  | LOF        | 0.66     | 0.107        | 0.233    |
| KCNQ1 | 126 | S   | F   | NM_000218.3(KCNQ1):c.758C>T (p.Ser253Phe) | not provided                                 | Likely pathogenic(Last reviewed: Feb 21, 2013)                            | criteria provided, single submitter            | VCV000200822 | 11               | 2572087        | 200822      | 197444      | rs794728513  | GOF        | 0.562    | 0.098        | 0.34     |
| KCNQ1 | 126 | S   | P   | NM_000218.3(KCNQ1):c.757T>C (p.Ser253Pro) | Long QT syndrome not provided                | Conflicting interpretations of pathogenicity(Last reviewed: Jun 26, 2019) | criteria provided, conflicting interpretations | VCV000200821 | 11               | 2572086        | 200821      | 197443      | rs764781840  | LOF        | 0.665    | 0.112        | 0.223    |
| KCNQ1 | 127 | F   | L   | NM_000218.3(KCNQ1):c.381C>A (p.Phe127Leu) | Congenital long QT syndrome                  | not provided                                                              | no assertion provided                          | VCV000067067 | 11               | 2445479        | 67067       | 77963       | rs199472682  | Neutral    | 0.63     | 0.256        | 0.114    |
| KCNQ1 | 129 | V   | A   | NM_000218.3(KCNQ1):c.386T>C (p.Val129Ala) | Long QT syndrome                             | Uncertain significance(Last reviewed: Oct 30, 2019)                       | criteria provided, single submitter            | VCV000945727 | 11               | 2445484        | 945727      | 926183      | rs1846024488 | Neutral    | 0.551    | 0.306        | 0.143    |
| KCNQ1 | 129 | V   | G   | NM_000218.3(KCNQ1):c.386T>G (p.Val129Gly) | Long QT syndrome                             | Uncertain significance(Last reviewed: Feb 24, 2020)                       | no assertion criteria provided                 | VCV000977167 | 11               | 2445484        | 977167      | 965307      | rs1846024488 | LOF        | 0.812    | 0.062        | 0.126    |
| KCNQ1 | 129 | V   | I   | NM_000218.3(KCNQ1):c.385G>A (p.Val129Ile) | not provided                                 | not provided                                                              | no assertion provided                          | VCV000067068 | 11               | 2445483        | 67068       | 77964       | rs199472683  | Neutral    | 0.455    | 0.411        | 0.134    |
| KCNQ1 | 131 | L   | P   | NM_000218.3(KCNQ1):c.392T>C (p.Leu131Pro) | not provided                                 | Uncertain significance(Last reviewed: Jan 12, 2018)                       | criteria provided, single submitter            | VCV000200873 | 11               | 2527933        | 200873      | 197423      | rs794728550  | LOF        | 0.826    | 0.086        | 0.088    |
| KCNQ1 | 132 | I   | L   | NM_000218.3(KCNQ1):c.394A>C (p.Ile132Leu) | Congenital long QT syndrome Arrhythmia       | Uncertain significance(Last reviewed: Jul 16, 2020)                       | criteria provided, single submitter            | VCV000053040 | 11               | 2527935        | 53040       | 67708       | rs199472684  | Neutral    | 0.468    | 0.412        | 0.12     |
| KCNQ1 | 133 | V   | I   | NM_000218.3(KCNQ1):c.397G>A (p.Val133Ile) | Long QT syndrome Congenital long QT syndrome | Uncertain significance(Last reviewed: Jan 23, 2020)                       | criteria provided, single submitter            | VCV000067069 | 11               | 2527938        | 67069       | 77965       | rs199473449  | Neutral    | 0.457    | 0.404        | 0.14     |

| gene  | pos | aa1 | aa2 | Name                                      | Condition(s)                                                                                   | Clinical significance (Last reviewed)                                     | Review status                                        | Accession    | GRCh38Chromosome | GRCh38Location | VariationID | AlleleID(s) | dbSNP ID     | prediction | prob.LOF | prob.Neutral | prob.GOF |
|-------|-----|-----|-----|-------------------------------------------|------------------------------------------------------------------------------------------------|---------------------------------------------------------------------------|------------------------------------------------------|--------------|------------------|----------------|-------------|-------------|--------------|------------|----------|--------------|----------|
| KCNQ1 | 134 | L   | P   | NM_000218.3(KCNQ1):c.401T>C (p.Leu134Pro) | Long QT syndrome Congenital long QT syndrome not provided                                      | Conflicting interpretations of pathogenicity(Last reviewed: Aug 13, 2019) | criteria provided, conflicting interpretations       | VCV000067070 | 11               | 2527942        | 67070       | 77966       | rs199472685  | LOF        | 0.817    | 0.091        | 0.091    |
| KCNQ1 | 135 | L   | P   | NM_000218.3(KCNQ1):c.785T>C (p.Leu262Pro) | Long QT syndrome 1 Prolonged QT interval                                                       | Pathogenic(Last reviewed: Jul 10, 2020)                                   | criteria provided, single submitter                  | VCV000560359 | 11               | 2572850        | 560359      | 551407      | rs1564821090 | LOF        | 0.785    | 0.118        | 0.097    |
| KCNQ1 | 136 | C   | F   | NM_000218.3(KCNQ1):c.407G>T (p.Cys136Phe) | Congenital long QT syndrome                                                                    | not provided                                                              | no assertion provided                                | VCV000053041 | 11               | 2527948        | 53041       | 67709       | rs199472686  | GOF        | 0.661    | 0.061        | 0.278    |
| KCNQ1 | 137 | L   | F   | NM_000218.3(KCNQ1):c.409C>T (p.Leu137Phe) | not provided Congenital long QT syndrome                                                       | Pathogenic(Last reviewed: Aug 19, 2014)                                   | criteria provided, single submitter                  | VCV000053042 | 11               | 2527950        | 53042       | 67710       | rs199473450  | Neutral    | 0.612    | 0.27         | 0.119    |
| KCNQ1 | 139 | L   | M   | NM_000218.3(KCNQ1):c.796C>A (p.Leu266Met) | Arrhythmia Short QT syndrome 2                                                                 | Uncertain significance(Last reviewed: Oct 5, 2018)                        | criteria provided, multiple submitters, no conflicts | VCV000598782 | 11               | 2572861        | 598782      | 589841      | rs1263583359 | Neutral    | 0.541    | 0.356        | 0.103    |
| KCNQ1 | 139 | L   | R   | NM_000218.3(KCNQ1):c.797T>G (p.Leu266Arg) | not provided Long QT syndrome                                                                  | Likely pathogenic(Last reviewed: Sep 23, 2020)                            | criteria provided, multiple submitters, no conflicts | VCV000393006 | 11               | 2572862        | 393006      | 372345      | rs199473460  | LOF        | 0.832    | 0.079        | 0.089    |
| KCNQ1 | 140 | S   | G   | NM_000218.3(KCNQ1):c.418A>G (p.Ser140Gly) | Atrial fibrillation, familial, 3 Atrial fibrillation                                           | Pathogenic(Last reviewed: Jan 10, 2003)                                   | no assertion criteria provided                       | VCV000003143 | 11               | 2527959        | 3143        | 18182       | rs120074192  | LOF        | 0.743    | 0.066        | 0.19     |
| KCNQ1 | 140 | Y   | F   | NM_000218.3(KCNQ1):c.800A>T (p.Tyr267Phe) | Cardiovascular phenotype Long QT syndrome                                                      | Uncertain significance(Last reviewed: Aug 8, 2020)                        | criteria provided, multiple submitters, no conflicts | VCV000264075 | 11               | 2572865        | 264075      | 258693      | rs886039033  | LOF        | 0.706    | 0.124        | 0.17     |
| KCNQ1 | 141 | I   | V   | NM_000218.3(KCNQ1):c.802A>G (p.Ile268Val) | not provided Arrhythmia                                                                        | Uncertain significance(Last reviewed: Nov 4, 2019)                        | criteria provided, multiple submitters, no conflicts | VCV000378922 | 11               | 2572867        | 378922      | 372346      | rs757421492  | Neutral    | 0.692    | 0.184        | 0.124    |
| KCNQ1 | 141 | V   | M   | NM_000218.3(KCNQ1):c.421G>A (p.Val141Met) | Short QT syndrome 2 Long QT syndrome Atrial fibrillation not provided Cardiovascular phenotype | Pathogenic(Last reviewed: Jan 17, 2020)                                   | criteria provided, multiple submitters, no conflicts | VCV000067072 | 11               | 2527962        | 67072       | 77968       | rs199472687  | Neutral    | 0.691    | 0.16         | 0.149    |
| KCNQ1 | 142 | G   | R   | NM_000218.3(KCNQ1):c.805G>C (p.Gly269Arg) | not provided                                                                                   | Pathogenic(Last reviewed: Dec 1, 2011)                                    | criteria provided, single submitter                  | VCV000200898 | 11               | 2572870        | 200898      | 197445      | rs120074193  | LOF        | 0.882    | 0.02         | 0.097    |
| KCNQ1 | 142 | G   | V   | NM_000218.3(KCNQ1):c.806G>T (p.Gly269Val) | not provided                                                                                   | Pathogenic(Last reviewed: Oct 14, 2014)                                   | criteria provided, single submitter                  | VCV000200899 | 11               | 2572871        | 200899      | 197446      | rs120074194  | LOF        | 0.795    | 0.06         | 0.145    |
| KCNQ1 | 143 | S   | F   | NM_000218.3(KCNQ1):c.428C>T (p.Ser143Phe) | Long QT syndrome                                                                               | Uncertain significance(Last reviewed: Aug 27, 2018)                       | criteria provided, single submitter                  | VCV000188120 | 11               | 2527969        | 188120      | 186152      | rs786204083  | GOF        | 0.719    | 0.032        | 0.249    |
| KCNQ1 | 144 | T   | A   | NM_000218.3(KCNQ1):c.430A>G (p.Thr144Ala) | Congenital long QT syndrome Long QT syndrome not provided Cardiovascular phenotype             | Conflicting interpretations of pathogenicity(Last reviewed: Jan 13, 2022) | criteria provided, conflicting interpretations       | VCV000067073 | 11               | 2527971        | 67073       | 77969       | rs199473451  | LOF        | 0.758    | 0.058        | 0.184    |
| KCNQ1 | 146 | E   | G   | NM_000218.3(KCNQ1):c.437A>G (p.Glu146Gly) | not specified not provided Long QT syndrome                                                    | Uncertain significance(Last reviewed: Jan 22, 2020)                       | criteria provided, multiple submitters, no conflicts | VCV000418272 | 11               | 2527978        | 418272      | 408327      | rs914460959  | LOF        | 0.848    | 0.061        | 0.091    |

| gene  | pos | aa1 | aa2 | Name                                      | Condition(s)                                                                                                | Clinical significance (Last reviewed)                                    | Review status                                        | Accession    | GRCh38Chromosome | GRCh38Location | VariationID | AlleleID(s) | dbSNP ID     | prediction | prob.LOF | prob.Neutral | prob.GOF |
|-------|-----|-----|-----|-------------------------------------------|-------------------------------------------------------------------------------------------------------------|--------------------------------------------------------------------------|------------------------------------------------------|--------------|------------------|----------------|-------------|-------------|--------------|------------|----------|--------------|----------|
| KCNQ1 | 146 | E   | K   | NM_000218.3(KCNQ1):c.436G>A (p.Glu146Lys) | Congenital long QT syndrome Long QT syndrome not provided Arrhythmia                                        | Uncertain significance(Last reviewed: Oct 23, 2020)                      | criteria provided, multiple submitters, no conflicts | VCV000053043 | 11               | 2527977        | 53043       | 67711       | rs199472688  | LOF        | 0.847    | 0.055        | 0.097    |
| KCNQ1 | 147 | Q   | L   | NM_000218.3(KCNQ1):c.440A>T (p.Gln147Leu) | not provided                                                                                                | Uncertain significance(Last reviewed: Jun 1, 2020)                       | criteria provided, single submitter                  | VCV001312672 | 11               | 2527981        | 1312672     | 1302933     | NA           | GOF        | 0.585    | 0.135        | 0.28     |
| KCNQ1 | 147 | Q   | R   | NM_000218.3(KCNQ1):c.440A>G (p.Gln147Arg) | Atrial fibrillation                                                                                         | not provided                                                             | no assertion provided                                | VCV000067074 | 11               | 2527981        | 67074       | 77970       | rs199472689  | LOF        | 0.756    | 0.101        | 0.143    |
| KCNQ1 | 149 | A   | T   | NM_000218.3(KCNQ1):c.445G>A (p.Ala149Thr) | Arrhythmia                                                                                                  | Uncertain significance(Last reviewed: Jul 15, 2021)                      | criteria provided, single submitter                  | VCV001331890 | 11               | 2527986        | 1331890     | 1322610     | NA           | Neutral    | 0.531    | 0.369        | 0.1      |
| KCNQ1 | 149 | S   | F   | NM_000218.3(KCNQ1):c.827C>T (p.Ser276Phe) | not provided                                                                                                | Likely pathogenic(Last reviewed: May 25, 2012)                           | criteria provided, single submitter                  | VCV000200823 | 11               | 2572892        | 200823      | 197447      | rs794728514  | LOF        | 0.686    | 0.135        | 0.179    |
| KCNQ1 | 150 | A   | G   | NM_000218.3(KCNQ1):c.449C>G (p.Ala150Gly) | Congenital long QT syndrome                                                                                 | not provided                                                             | no assertion provided                                | VCV000053044 | 11               | 2527990        | 53044       | 67712       | rs199473452  | Neutral    | 0.729    | 0.186        | 0.084    |
| KCNQ1 | 150 | A   | T   | NM_000218.3(KCNQ1):c.448G>A (p.Ala150Thr) | Arrhythmia Long QT syndrome                                                                                 | Uncertain significance(Last reviewed: May 27, 2020)                      | criteria provided, multiple submitters, no conflicts | VCV000200909 | 11               | 2527989        | 200909      | 197426      | rs794728577  | Neutral    | 0.555    | 0.358        | 0.087    |
| KCNQ1 | 152 | F   | C   | NM_000218.3(KCNQ1):c.836T>G (p.Phe279Cys) | Long QT syndrome                                                                                            | Uncertain significance(Last reviewed: Jul 19, 2018)                      | criteria provided, single submitter                  | VCV000663237 | 11               | 2572901        | 663237      | 639907      | rs1589958473 | LOF        | 0.902    | 0.033        | 0.065    |
| KCNQ1 | 153 | T   | M   | NM_000218.3(KCNQ1):c.458C>T (p.Thr153Met) | Long QT syndrome Hypertrophic cardiomyopathy Arrhythmia Cardiovascular phenotype not specified not provided | Conflicting interpretations of pathogenicity(Last reviewed: Aug 3, 2021) | criteria provided, conflicting interpretations       | VCV000067075 | 11               | 2527999        | 67075       | 77971       | rs143709408  | LOF        | 0.739    | 0.135        | 0.127    |
| KCNQ1 | 155 | L   | V   | NM_000218.3(KCNQ1):c.844C>G (p.Leu282Val) | Arrhythmia not provided                                                                                     | Uncertain significance(Last reviewed: Jan 8, 2020)                       | criteria provided, multiple submitters, no conflicts | VCV000919046 | 11               | 2572909        | 919046      | 911569      | rs979241598  | Neutral    | 0.662    | 0.262        | 0.076    |
| KCNQ1 | 156 | A   | P   | NM_000218.3(KCNQ1):c.847G>C (p.Ala283Pro) | Long QT syndrome                                                                                            | Uncertain significance(Last reviewed: Oct 8, 2016)                       | criteria provided, single submitter                  | VCV000405263 | 11               | 2572912        | 405263      | 398469      | rs1060500627 | LOF        | 0.872    | 0.054        | 0.074    |
| KCNQ1 | 156 | L   | P   | NM_000218.3(KCNQ1):c.467T>C (p.Leu156Pro) | not provided                                                                                                | Likely pathogenic                                                        | criteria provided, single submitter                  | VCV000684787 | 11               | 2528008        | 684787      | 672419      | rs1589931156 | LOF        | 0.906    | 0.036        | 0.058    |
| KCNQ1 | 157 | F   | C   | NM_000218.3(KCNQ1):c.470T>G (p.Phe157Cys) | Congenital long QT syndrome                                                                                 | not provided                                                             | no assertion provided                                | VCV000053046 | 11               | 2528011        | 53046       | 67714       | rs199472690  | LOF        | 0.898    | 0.032        | 0.07     |
| KCNQ1 | 159 | M   | L   | NM_000218.3(KCNQ1):c.475A>T (p.Met159Leu) | Long QT syndrome                                                                                            | Uncertain significance(Last reviewed: Oct 12, 2018)                      | criteria provided, single submitter                  | VCV000664331 | 11               | 2528016        | 664331      | 639900      | rs1589931165 | Neutral    | 0.658    | 0.241        | 0.101    |
| KCNQ1 | 160 | A   | S   | NM_000218.3(KCNQ1):c.859G>T (p.Ala287Ser) | Arrhythmia                                                                                                  | Uncertain significance(Last reviewed: Mar 6, 2020)                       | criteria provided, single submitter                  | VCV000926686 | 11               | 2572924        | 926686      | 911570      | rs765665086  | LOF        | 0.779    | 0.123        | 0.098    |
| KCNQ1 | 160 | A   | T   | NM_000218.3(KCNQ1):c.859G>A (p.Ala287Thr) | not provided Long QT syndrome Arrhythmia                                                                    | Uncertain significance(Last reviewed: Sep 18, 2020)                      | criteria provided, multiple submitters, no           | VCV000657731 | 11               | 2572924        | 657731      | 639908      | rs765665086  | Neutral    | 0.729    | 0.168        | 0.103    |

| gene  | pos | aa1 | aa2 | Name                                      | Condition(s)                                                                                                     | Clinical significance (Last reviewed)               | Review status                                        | Accession    | GRCh38Chromosome | GRCh38Location | VariationID | AlleleID(s) | dbSNP ID     | prediction | prob.LOF | prob.Neutral | prob.GOF |
|-------|-----|-----|-----|-------------------------------------------|------------------------------------------------------------------------------------------------------------------|-----------------------------------------------------|------------------------------------------------------|--------------|------------------|----------------|-------------|-------------|--------------|------------|----------|--------------|----------|
|       |     |     |     |                                           |                                                                                                                  |                                                     | conflicts                                            |              |                  |                |             |             |              |            |          |              |          |
| KCNQ1 | 160 | A   | V   | NM_000218.3(KCNQ1):c.860C>T (p.Ala287Val) | Arrhythmia                                                                                                       | Uncertain significance(Last reviewed: Nov 16, 2018) | criteria provided, single submitter                  | VCV000923836 | 11               | 2572925        | 923836      | 911571      | rs199472735  | Neutral    | 0.654    | 0.223        | 0.123    |
| KCNQ1 | 160 | E   | K   | NM_000218.3(KCNQ1):c.478G>A (p.Glu160Lys) | Congenital long QT syndrome                                                                                      | not provided                                        | no assertion provided                                | VCV000053049 | 11               | 2570628        | 53049       | 67717       | rs199473453  | LOF        | 0.867    | 0.044        | 0.088    |
| KCNQ1 | 160 | E   | V   | NM_000218.3(KCNQ1):c.479A>T (p.Glu160Val) | Congenital long QT syndrome                                                                                      | not provided                                        | no assertion provided                                | VCV000067076 | 11               | 2570629        | 67076       | 77972       | rs199472691  | LOF        | 0.785    | 0.086        | 0.129    |
| KCNQ1 | 161 | V   | M   | NM_000218.3(KCNQ1):c.862G>A (p.Val288Met) | not provided Arrhythmia                                                                                          | Uncertain significance(Last reviewed: Dec 9, 2020)  | criteria provided, multiple submitters, no conflicts | VCV000452888 | 11               | 2572927        | 452888      | 444784      | rs946704016  | Neutral    | 0.712    | 0.196        | 0.093    |
| KCNQ1 | 162 | V   | M   | NM_000218.3(KCNQ1):c.484G>A (p.Val162Met) | Arrhythmia not specified not provided Long QT syndrome Congenital long QT syndrome                               | Uncertain significance(Last reviewed: Jun 15, 2021) | criteria provided, multiple submitters, no conflicts | VCV000067077 | 11               | 2570634        | 67077       | 77973       | rs199472692  | Neutral    | 0.719    | 0.2          | 0.082    |
| KCNQ1 | 164 | V   | A   | NM_000218.3(KCNQ1):c.491T>C (p.Val164Ala) | Arrhythmia                                                                                                       | Uncertain significance(Last reviewed: Apr 2, 2019)  | criteria provided, single submitter                  | VCV000922815 | 11               | 2570641        | 922815      | 911552      | rs1848316801 | LOF        | 0.774    | 0.136        | 0.09     |
| KCNQ1 | 165 | V   | A   | NM_000218.3(KCNQ1):c.494T>C (p.Val165Ala) | Arrhythmia                                                                                                       | Uncertain significance(Last reviewed: Nov 28, 2018) | criteria provided, single submitter                  | VCV000922039 | 11               | 2570644        | 922039      | 911553      | rs1848317004 | Neutral    | 0.729    | 0.192        | 0.079    |
| KCNQ1 | 165 | V   | M   | NM_000218.3(KCNQ1):c.493G>A (p.Val165Met) | Arrhythmia not specified                                                                                         | Uncertain significance(Last reviewed: Jul 31, 2019) | criteria provided, multiple submitters, no conflicts | VCV000426347 | 11               | 2570643        | 426347      | 415264      | rs1085307580 | Neutral    | 0.719    | 0.197        | 0.084    |
| KCNQ1 | 167 | V   | M   | NM_000218.3(KCNQ1):c.880G>A (p.Val294Met) | Arrhythmia                                                                                                       | Uncertain significance(Last reviewed: Oct 30, 2018) | criteria provided, single submitter                  | VCV000629619 | 11               | 2572945        | 629619      | 617853      | rs749073770  | Neutral    | 0.744    | 0.159        | 0.097    |
| KCNQ1 | 168 | G   | R   | NM_000218.3(KCNQ1):c.502G>C (p.Gly168Arg) | Cardiovascular phenotype not provided Congenital long QT syndrome Long QT syndrome                               | Pathogenic(Last reviewed: Aug 11, 2020)             | criteria provided, multiple submitters, no conflicts | VCV000053053 | 11               | 2570652        | 53053       | 67721       | rs179489     | LOF        | 0.909    | 0.017        | 0.074    |
| KCNQ1 | 168 | G   | R   | NM_000218.3(KCNQ1):c.502G>C (p.Gly168Arg) | Cardiovascular phenotype not provided Congenital long QT syndrome Long QT syndrome                               | Pathogenic(Last reviewed: Aug 11, 2020)             | criteria provided, multiple submitters, no conflicts | VCV000053053 | 11               | 2570652        | 53053       | 67721       | rs179489     | LOF        | 0.909    | 0.017        | 0.074    |
| KCNQ1 | 168 | G   | R   | NM_000218.3(KCNQ1):c.502G>A (p.Gly168Arg) | Long QT syndrome 1 Long QT syndrome not provided Congenital long QT syndrome Arrhythmia Cardiovascular phenotype | Pathogenic(Last reviewed: Oct 28, 2020)             | criteria provided, multiple submitters, no conflicts | VCV000053052 | 11               | 2570652        | 53052       | 67720       | rs179489     | LOF        | 0.909    | 0.017        | 0.074    |
| KCNQ1 | 168 | G   | R   | NM_000218.3(KCNQ1):c.502G>A (p.Gly168Arg) | Long QT syndrome 1 Long QT syndrome not provided Congenital long QT syndrome Arrhythmia Cardiovascular phenotype | Pathogenic(Last reviewed: Oct 28, 2020)             | criteria provided, multiple submitters, no conflicts | VCV000053052 | 11               | 2570652        | 53052       | 67720       | rs179489     | LOF        | 0.909    | 0.017        | 0.074    |
| KCNQ1 | 169 | T   | M   | NM_000218.3(KCNQ1):c.506C>T (p.Thr169Met) | Long QT syndrome 1 Arrhythmia Long QT syndrome                                                                   | Uncertain significance(Last reviewed: Jan 4, 2021)  | criteria provided, multiple submitters, no conflicts | VCV000405270 | 11               | 2570656        | 405270      | 398114      | rs199472693  | LOF        | 0.73     | 0.11         | 0.161    |

| gene  | pos | aa1 | aa2 | Name                                      | Condition(s)                                                                                                                                                                                                                                                                                                                                                        | Clinical significance (Last reviewed)                                     | Review status                                        | Accession    | GRCh38Chromosome | GRCh38Location | VariationID | AlleleID(s) | dbSNP ID     | prediction | prob.LOF | prob.Neutral | prob.GOF |
|-------|-----|-----|-----|-------------------------------------------|---------------------------------------------------------------------------------------------------------------------------------------------------------------------------------------------------------------------------------------------------------------------------------------------------------------------------------------------------------------------|---------------------------------------------------------------------------|------------------------------------------------------|--------------|------------------|----------------|-------------|-------------|--------------|------------|----------|--------------|----------|
| KCNQ1 | 169 | T   | R   | NM_000218.3(KCNQ1):c.506C>G (p.Thr169Arg) | Congenital long QT syndrome                                                                                                                                                                                                                                                                                                                                         | not provided                                                              | no assertion provided                                | VCV000053055 | 11               | 2570656        | 53055       | 67723       | rs199472693  | LOF        | 0.842    | 0.065        | 0.093    |
| KCNQ1 | 171 | Y   | H   | NM_000218.3(KCNQ1):c.511T>C (p.Tyr171His) | Long QT syndrome                                                                                                                                                                                                                                                                                                                                                    | Uncertain significance(Last reviewed: Mar 6, 2020)                        | criteria provided, single submitter                  | VCV001034572 | 11               | 2570661        | 1034572     | 1030172     | rs1848317948 | LOF        | 0.869    | 0.044        | 0.087    |
| KCNQ1 | 172 | V   | M   | NM_000218.3(KCNQ1):c.514G>A (p.Val172Met) | Arrhythmic/Cardiovascular phenotype Short QT syndrome 2 Atrial fibrillation, familial, 3 Jervell and Lange-Nielsen syndrome 1 Congenital long QT syndrome not provided Long QT syndrome 1  Long QT syndrome Atrial fibrillation, familial, 3  Beckwith-Wiedemann syndrome Jervell and Lange-Nielsen syndrome 1 Long QT syndrome 1 Short QT syndrome 2 not specified | Conflicting interpretations of pathogenicity(Last reviewed: Jul 26, 2021) | criteria provided, conflicting interpretations       | VCV000067078 | 11               | 2570664        | 67078       | 77974       | rs199472694  | Neutral    | 0.626    | 0.286        | 0.088    |
| KCNQ1 | 173 | A   | S   | NM_000218.3(KCNQ1):c.898G>T (p.Ala300Ser) | Arrhythmia                                                                                                                                                                                                                                                                                                                                                          | Uncertain significance(Last reviewed: Nov 20, 2018)                       | criteria provided, single submitter                  | VCV000919940 | 11               | 2572963        | 919940      | 911578      | rs120074187  | Neutral    | 0.659    | 0.228        | 0.113    |
| KCNQ1 | 173 | V   | D   | NM_000218.3(KCNQ1):c.518T>A (p.Val173Asp) | Congenital long QT syndrome Recurrent spontaneous abortion                                                                                                                                                                                                                                                                                                          | Pathogenic(Last reviewed: Mar 1, 2021)                                    | criteria provided, single submitter                  | VCV000053057 | 11               | 2570668        | 53057       | 67725       | rs199472695  | LOF        | 0.858    | 0.058        | 0.085    |
| KCNQ1 | 174 | D   | V   | NM_000218.3(KCNQ1):c.902A>T (p.Asp301Val) | Cardiovascular phenotype Long QT syndrome                                                                                                                                                                                                                                                                                                                           | Conflicting interpretations of pathogenicity(Last reviewed: Sep 9, 2019)  | criteria provided, conflicting interpretations       | VCV000519367 | 11               | 2572967        | 519367      | 510276      | rs1554893260 | LOF        | 0.801    | 0.035        | 0.164    |
| KCNQ1 | 174 | R   | C   | NM_000218.3(KCNQ1):c.520C>T (p.Arg174Cys) | Long QT syndrome not provided Congenital long QT syndrome Arrhythmic Long QT syndrome 1                                                                                                                                                                                                                                                                             | Pathogenic/Likely pathogenic(Last reviewed: Dec 14, 2021)                 | criteria provided, multiple submitters, no conflicts | VCV000053058 | 11               | 2570670        | 53058       | 67726       | rs199472696  | LOF        | 0.887    | 0.013        | 0.1      |
| KCNQ1 | 174 | R   | H   | NM_000218.3(KCNQ1):c.521G>A (p.Arg174His) | Congenital long QT syndrome not provided Long QT syndrome Long QT syndrome 1                                                                                                                                                                                                                                                                                        | Pathogenic/Likely pathogenic(Last reviewed: Oct 7, 2020)                  | criteria provided, multiple submitters, no conflicts | VCV000053059 | 11               | 2570671        | 53059       | 67727       | rs199472697  | LOF        | 0.862    | 0.031        | 0.106    |
| KCNQ1 | 174 | R   | L   | NM_000218.3(KCNQ1):c.521G>T (p.Arg174Leu) | not provided                                                                                                                                                                                                                                                                                                                                                        | Likely pathogenic(Last reviewed: Jun 17, 2014)                            | criteria provided, single submitter                  | VCV000200814 | 11               | 2570671        | 200814      | 197429      | rs199472697  | LOF        | 0.767    | 0.032        | 0.201    |
| KCNQ1 | 174 | R   | P   | NM_000218.3(KCNQ1):c.521G>C (p.Arg174Pro) | Congenital long QT syndrome                                                                                                                                                                                                                                                                                                                                         | not provided                                                              | no assertion provided                                | VCV000053060 | 11               | 2570671        | 53060       | 67728       | rs199472697  | LOF        | 0.845    | 0.039        | 0.116    |
| KCNQ1 | 175 | A   | V   | NM_000218.3(KCNQ1):c.905C>T (p.Ala302Val) | not provided Long QT syndrome 1  Cardiovascular phenotype Long QT syndrome  Congenital long QT syndrome                                                                                                                                                                                                                                                             | Pathogenic/Likely pathogenic(Last reviewed: Dec 1, 2021)                  | criteria provided, multiple submitters, no conflicts | VCV000036439 | 11               | 2572970        | 36439       | 45102       | rs193922365  | Neutral    | 0.698    | 0.175        | 0.127    |
| KCNQ1 | 175 | L   | F   | NM_000218.3(KCNQ1):c.523C>T (p.Leu175Phe) | Long QT syndrome 1                                                                                                                                                                                                                                                                                                                                                  | Uncertain significance(Last reviewed: Nov 16, 2016)                       | criteria provided, single submitter                  | VCV000431030 | 11               | 2570673        | 431030      | 424564      | rs1131692322 | LOF        | 0.772    | 0.134        | 0.094    |
| KCNQ1 | 176 | W   | R   | NM_000218.3(KCNQ1):c.526T>C (p.Trp176Arg) | not provided                                                                                                                                                                                                                                                                                                                                                        | Conflicting interpretations of pathogenicity(Last reviewed: Aug 21, 2019) | criteria provided, conflicting interpretations       | VCV000449041 | 11               | 2570676        | 449041      | 444782      | rs1554892900 | LOF        | 0.857    | 0.046        | 0.097    |
| KCNQ1 | 177 | W   | S   | NM_000218.3(KCNQ1):c.911G>C (p.Trp304Ser) | not provided                                                                                                                                                                                                                                                                                                                                                        | Likely pathogenic(Last reviewed: Apr 12, 2021)                            | criteria provided, single submitter                  | VCV001212402 | 11               | 2572976        | 1212402     | 1202396     | NA           | LOF        | 0.897    | 0.026        | 0.078    |
| KCNQ1 | 178 | A   | P   | NM_000218.3(KCNQ1):c.532G>C (p.Ala178Pro) | Congenital long QT syndrome Long QT syndrome 1                                                                                                                                                                                                                                                                                                                      | Pathogenic(Last reviewed: Jan 1,                                          | no assertion criteria provided                       | VCV000003113 | 11               | 2570682        | 3113        | 18152       | rs120074177  | LOF        | 0.876    | 0.037        | 0.086    |



| gene  | pos | aa1 | aa2 | Name                                      | Condition(s)                                                                                                                                                  | Clinical significance (Last reviewed)                                     | Review status                                        | Accession    | GRCh38Chromosome | GRCh38Location | VariationID | AlleleID(s) | dbSNP ID     | prediction | prob.LOF | prob.Neutral | prob.GOF |
|-------|-----|-----|-----|-------------------------------------------|---------------------------------------------------------------------------------------------------------------------------------------------------------------|---------------------------------------------------------------------------|------------------------------------------------------|--------------|------------------|----------------|-------------|-------------|--------------|------------|----------|--------------|----------|
|       |     |     |     |                                           |                                                                                                                                                               | 1996)                                                                     |                                                      |              |                  |                |             |             |              |            |          |              |          |
| KCNQ1 | 178 | A   | T   | NM_000218.3(KCNQ1):c.532G>A (p.Ala178Thr) | Cardiovascular phenotype Long QT syndrome not provided Congenital long QT syndrome Long QT syndrome 1 Long QT syndrome 1 Jervell and Lange-Nielsen syndrome 1 | Pathogenic/Likely pathogenic(Last reviewed: May 4, 2021)                  | criteria provided, multiple submitters, no conflicts | VCV000053061 | 11               | 2570682        | 53061       | 67729       | rs120074177  | LOF        | 0.856    | 0.048        | 0.096    |
| KCNQ1 | 178 | W   | L   | NM_000218.3(KCNQ1):c.914G>T (p.Trp305Leu) | not provided Jervell and Lange-Nielsen syndrome 1 Long QT syndrome 1                                                                                          | Pathogenic(Last reviewed: Jan 3, 2022)                                    | criteria provided, multiple submitters, no conflicts | VCV000200824 | 11               | 2572979        | 200824      | 197448      | rs120074186  | LOF        | 0.874    | 0.03         | 0.096    |
| KCNQ1 | 179 | G   | A   | NM_000218.3(KCNQ1):c.536G>C (p.Gly179Ala) | not provided                                                                                                                                                  | Likely pathogenic(Last reviewed: Jan 11, 2018)                            | criteria provided, single submitter                  | VCV000378906 | 11               | 2570686        | 378906      | 372137      | rs76737438   | LOF        | 0.894    | 0.024        | 0.081    |
| KCNQ1 | 179 | G   | E   | NM_000218.3(KCNQ1):c.917G>A (p.Gly306Glu) | Long QT syndrome                                                                                                                                              | Uncertain significance(Last reviewed: Jun 30, 2020)                       | criteria provided, single submitter                  | VCV000998695 | 11               | 2572982        | 998695      | 994446      | rs199472742  | LOF        | 0.915    | 0.014        | 0.071    |
| KCNQ1 | 179 | G   | S   | NM_000218.3(KCNQ1):c.535G>A (p.Gly179Ser) | Congenital long QT syndrome Long QT syndrome 1 not provided Arrhythmic Cardiovascular phenotype Long QT syndrome                                              | Pathogenic(Last reviewed: Aug 30, 2021)                                   | criteria provided, multiple submitters, no conflicts | VCV000053063 | 11               | 2570685        | 53063       | 67731       | rs199473394  | LOF        | 0.902    | 0.023        | 0.075    |
| KCNQ1 | 180 | V   | E   | NM_000218.3(KCNQ1):c.920T>A (p.Val307Glu) | Long QT syndrome                                                                                                                                              | Uncertain significance(Last reviewed: Mar 1, 2019)                        | criteria provided, single submitter                  | VCV000849152 | 11               | 2572985        | 849152      | 838239      | rs1589958619 | LOF        | 0.791    | 0.067        | 0.142    |
| KCNQ1 | 181 | R   | C   | NM_000218.3(KCNQ1):c.541C>T (p.Arg181Cys) | Arrhythmic not provided                                                                                                                                       | Uncertain significance(Last reviewed: Oct 30, 2018)                       | criteria provided, single submitter                  | VCV000067079 | 11               | 2570691        | 67079       | 77975       | rs199473395  | LOF        | 0.835    | 0.068        | 0.097    |
| KCNQ1 | 183 | K   | R   | NM_000218.3(KCNQ1):c.548A>G (p.Lys183Arg) | Congenital long QT syndrome                                                                                                                                   | not provided                                                              | no assertion provided                                | VCV000067080 | 11               | 2570698        | 67080       | 77976       | rs199473396  | LOF        | 0.84     | 0.073        | 0.087    |
| KCNQ1 | 184 | Y   | D   | NM_000218.3(KCNQ1):c.550T>G (p.Tyr184Asp) | not provided                                                                                                                                                  | Likely pathogenic(Last reviewed: May 2, 2016)                             | criteria provided, single submitter                  | VCV000200815 | 11               | 2570700        | 200815      | 197430      | rs199473661  | LOF        | 0.752    | 0.073        | 0.175    |
| KCNQ1 | 184 | Y   | H   | NM_000218.3(KCNQ1):c.550T>C (p.Tyr184His) | Congenital long QT syndrome not provided Long QT syndrome                                                                                                     | Conflicting interpretations of pathogenicity(Last reviewed: Jun 22, 2020) | criteria provided, conflicting interpretations       | VCV000067081 | 11               | 2570700        | 67081       | 77977       | rs199473661  | LOF        | 0.685    | 0.136        | 0.18     |
| KCNQ1 | 184 | Y   | S   | NM_000218.3(KCNQ1):c.551A>C (p.Tyr184Ser) | Long QT syndrome 1 Congenital long QT syndrome                                                                                                                | Pathogenic(Last reviewed: May 28, 2019)                                   | criteria provided, single submitter                  | VCV000053064 | 11               | 2570701        | 53064       | 67732       | rs199473397  | LOF        | 0.667    | 0.122        | 0.211    |
| KCNQ1 | 185 | T   | S   | NM_000218.3(KCNQ1):c.934A>T (p.Thr312Ser) | Long QT syndrome 1                                                                                                                                            | Likely pathogenic                                                         | no assertion criteria provided                       | VCV000522585 | 11               | 2583447        | 522585      | 513199      | rs1554894445 | Neutral    | 0.498    | 0.304        | 0.199    |
| KCNQ1 | 185 | V   | M   | NM_000218.3(KCNQ1):c.553G>A (p.Val185Met) | Arrhythmia                                                                                                                                                    | Uncertain significance(Last reviewed: Jun 19, 2019)                       | criteria provided, single submitter                  | VCV000919842 | 11               | 2570703        | 919842      | 911555      | rs749351255  | Neutral    | 0.572    | 0.256        | 0.173    |
| KCNQ1 | 186 | G   | A   | NM_000218.3(KCNQ1):c.557G>C (p.Gly186Ala) | not specified                                                                                                                                                 | Uncertain significance(Last reviewed: Oct 19, 2021)                       | criteria provided, single submitter                  | VCV001321388 | 11               | 2570707        | 1321388     | 1311672     | NA           | LOF        | 0.784    | 0.074        | 0.142    |
| KCNQ1 | 186 | G   | C   | NM_000218.3(KCNQ1):c.556G>T (p.Gly186Cys) | not provided                                                                                                                                                  | Likely pathogenic(Last reviewed: May 2, 2016)                             | criteria provided, single submitter                  | VCV000432149 | 11               | 2570706        | 432149      | 425920      | rs199473398  | LOF        | 0.845    | 0.045        | 0.11     |

| gene  | pos | aa1 | aa2 | Name                                      | Condition(s)                                                                              | Clinical significance (Last reviewed)                     | Review status                                        | Accession     | GRCh38Chromosome | GRCh38Location | VariationID | AlleleID(s) | dbSNP ID     | prediction | prob.LOF | prob.Neutral | prob.GOF |
|-------|-----|-----|-----|-------------------------------------------|-------------------------------------------------------------------------------------------|-----------------------------------------------------------|------------------------------------------------------|---------------|------------------|----------------|-------------|-------------|--------------|------------|----------|--------------|----------|
| KCNQ1 | 186 | G   | D   | NM_000218.3(KCNQ1):c.557G>A (p.Gly186Asp) | Arrhythmic(not provided) Long QT syndrome  Congenital long QT syndrome Long QT syndrome 1 | Likely pathogenic(Last reviewed: Apr 8, 2020)             | criteria provided, multiple submitters, no conflicts | VCV000207967  | 11               | 2570707        | 207967      | 204198      | rs794728568  | LOF        | 0.85     | 0.04         | 0.11     |
| KCNQ1 | 186 | G   | R   | NM_000218.3(KCNQ1):c.556G>C (p.Gly186Arg) | Long QT syndrome Congenital long QT syndrome                                              | Likely pathogenic(Last reviewed: Oct 31, 2019)            | criteria provided, single submitter                  | VCV000053065  | 11               | 2570706        | 53065       | 67733       | rs199473398  | LOF        | 0.83     | 0.034        | 0.136    |
| KCNQ1 | 186 | G   | S   | NM_000218.3(KCNQ1):c.556G>A (p.Gly186Ser) | Congenital long QT syndrome Long QT syndrome 1                                            | Uncertain significance(Last reviewed: Dec 17, 2018)       | criteria provided, single submitter                  | VCV000067082  | 11               | 2570706        | 67082       | 77978       | rs199473398  | LOF        | 0.795    | 0.076        | 0.129    |
| KCNQ1 | 186 | G   | V   | NM_000218.3(KCNQ1):c.557G>T (p.Gly186Val) | not provided                                                                              | Pathogenic(Last reviewed: Nov 28, 2011)                   | criteria provided, single submitter                  | VCV000200894  | 11               | 2570707        | 200894      | 197432      | rs794728568  | LOF        | 0.782    | 0.07         | 0.148    |
| KCNQ1 | 187 | L   | F   | NM_000218.3(KCNQ1):c.559C>T (p.Leu187Phe) | not provided                                                                              | Uncertain significance(Last reviewed: Oct 3, 2019)        | criteria provided, single submitter                  | VCV001309157  | 11               | 2570709        | 1309157     | 1299857     | NA           | Neutral    | 0.488    | 0.401        | 0.111    |
| KCNQ1 | 187 | L   | P   | NM_000218.3(KCNQ1):c.560T>C (p.Leu187Pro) | not provided Congenital long QT syndrome Long QT syndrome                                 | Pathogenic/Likely pathogenic(Last reviewed: Sep 10, 2020) | criteria provided, multiple submitters, no conflicts | VCV000053066  | 11               | 2570710        | 53066       | 67734       | rs199473399  | Neutral    | 0.484    | 0.403        | 0.113    |
| KCNQ1 | 187 | L   | R   | NM_000218.3(KCNQ1):c.560T>G (p.Leu187Arg) | Long QT syndrome                                                                          | Uncertain significance(Last reviewed: May 30, 2019)       | criteria provided, single submitter                  | VCV0000843851 | 11               | 2570710        | 843851      | 838234      | rs199473399  | Neutral    | 0.657    | 0.233        | 0.11     |
| KCNQ1 | 188 | W   | S   | NM_000218.3(KCNQ1):c.563G>C (p.Trp188Ser) | Long QT syndrome                                                                          | Uncertain significance(Last reviewed: Jul 30, 2018)       | criteria provided, single submitter                  | VCV000643351  | 11               | 2570713        | 643351      | 639904      | rs1240024663 | LOF        | 0.77     | 0.114        | 0.116    |
| KCNQ1 | 188 | Y   | H   | NM_000218.3(KCNQ1):c.943T>C (p.Tyr315His) | not provided                                                                              | Pathogenic(Last reviewed: Sep 11, 2017)                   | criteria provided, single submitter                  | VCV000449302  | 11               | 2583456        | 449302      | 444785      | rs1554894448 | Neutral    | 0.61     | 0.263        | 0.126    |
| KCNQ1 | 189 | G   | E   | NM_000218.3(KCNQ1):c.566G>A (p.Gly189Glu) | Congenital long QT syndrome                                                               | not provided                                              | no assertion provided                                | VCV000053068  | 11               | 2570716        | 53068       | 67736       | rs199473400  | LOF        | 0.908    | 0.018        | 0.074    |
| KCNQ1 | 189 | G   | R   | NM_000218.3(KCNQ1):c.565G>C (p.Gly189Arg) | Congenital long QT syndrome                                                               | not provided                                              | no assertion provided                                | VCV000067083  | 11               | 2570715        | 67083       | 77979       | rs104894252  | LOF        | 0.903    | 0.017        | 0.08     |
| KCNQ1 | 189 | G   | R   | NM_000218.3(KCNQ1):c.565G>C (p.Gly189Arg) | Congenital long QT syndrome                                                               | not provided                                              | no assertion provided                                | VCV000067083  | 11               | 2570715        | 67083       | 77979       | rs104894252  | LOF        | 0.903    | 0.017        | 0.08     |
| KCNQ1 | 189 | G   | R   | NM_000218.3(KCNQ1):c.565G>A (p.Gly189Arg) | not provided Congenital long QT syndrome Long QT syndrome 1 Long QT syndrome              | Pathogenic/Likely pathogenic(Last reviewed: Jun 18, 2020) | criteria provided, multiple submitters, no conflicts | VCV000003114  | 11               | 2570715        | 3114        | 18153       | rs104894252  | LOF        | 0.903    | 0.017        | 0.08     |
| KCNQ1 | 189 | G   | R   | NM_000218.3(KCNQ1):c.565G>A (p.Gly189Arg) | not provided Congenital long QT syndrome Long QT syndrome 1 Long QT syndrome              | Pathogenic/Likely pathogenic(Last reviewed: Jun 18, 2020) | criteria provided, multiple submitters, no conflicts | VCV000003114  | 11               | 2570715        | 3114        | 18153       | rs104894252  | LOF        | 0.903    | 0.017        | 0.08     |
| KCNQ1 | 189 | G   | W   | NM_000218.3(KCNQ1):c.946G>T (p.Gly316Trp) | not provided                                                                              | Pathogenic(Last reviewed: Nov 18, 2013)                   | criteria provided, single submitter                  | VCV000200826  | 11               | 2583459        | 200826      | 197451      | rs104894255  | LOF        | 0.834    | 0.021        | 0.145    |
| KCNQ1 | 190 | D   | A   | NM_000218.3(KCNQ1):c.950A>C (p.Asp317Ala) | Long QT syndrome                                                                          | Uncertain significance(Last reviewed: Jul 8, 2020)        | criteria provided, single submitter                  | VCV001056776  | 11               | 2583463        | 1056776     | 1047163     | NA           | LOF        | 0.823    | 0.049        | 0.128    |
| KCNQ1 | 190 | R   | L   | NM_000218.3(KCNQ1):c.569G>T (p.Arg190Leu) | Long QT syndrome Arrhythmic(not provided)  Long QT syndrome 1 Congenital long QT          | Pathogenic/Likely pathogenic(Last reviewed: Jul 8, 2020)  | criteria provided, single submitter                  | VCV000067084  | 11               | 2570719        | 67084       | 77980       | rs120074178  | LOF        | 0.747    | 0.043        | 0.209    |

| gene  | pos | aa1 | aa2 | Name                                      | Condition(s)                                                                                                     | Clinical significance (Last reviewed)                                     | Review status                                        | Accession    | GRCh38Chromosome | GRCh38Location | VariationID | AlleleID(s) | dbSNP ID    | prediction | prob.LOF | prob.Neutral | prob.GOF |  |
|-------|-----|-----|-----|-------------------------------------------|------------------------------------------------------------------------------------------------------------------|---------------------------------------------------------------------------|------------------------------------------------------|--------------|------------------|----------------|-------------|-------------|-------------|------------|----------|--------------|----------|--|
|       |     |     |     |                                           | syndrome                                                                                                         |                                                                           | reviewed: Aug 27, 2019)                              |              |                  |                |             |             |             |            |          |              |          |  |
| KCNQ1 | 190 | R   | P   | NM_000218.3(KCNQ1):c.569G>C (p.Arg190Pro) | Long QT syndrome                                                                                                 | Uncertain significance(Last reviewed: Mar 11, 2016)                       | criteria provided, single submitter                  | VCV000237228 | 11               | 2570719        | 237228      | 241085      | rs120074178 | LOF        | 0.842    | 0.05         | 0.108    |  |
| KCNQ1 | 190 | R   | Q   | NM_000218.3(KCNQ1):c.569G>A (p.Arg190Gln) | not provided Long QT syndrome Cardiovascular phenotype Long QT syndrome 1 Arrhythmic Congenital long QT syndrome | Pathogenic(Last reviewed: Nov 29, 2021)                                   | criteria provided, multiple submitters, no conflicts | VCV000003117 | 11               | 2570719        | 3117        | 18156       | rs120074178 | LOF        | 0.855    | 0.048        | 0.097    |  |
| KCNQ1 | 190 | R   | W   | NM_000218.3(KCNQ1):c.568C>T (p.Arg190Trp) | Long QT syndrome Cardiovascular phenotype not provided Congenital long QT syndrome                               | Pathogenic/Likely pathogenic(Last reviewed: Aug 13, 2021)                 | criteria provided, multiple submitters, no conflicts | VCV000053070 | 11               | 2570718        | 53070       | 67738       | rs199473662 | LOF        | 0.791    | 0.036        | 0.173    |  |
| KCNQ1 | 191 | K   | T   | NM_000218.3(KCNQ1):c.953A>C (p.Lys318Thr) | not provided                                                                                                     | Uncertain significance(Last reviewed: Feb 3, 2017)                        | criteria provided, single submitter                  | VCV000200827 | 11               | 2583466        | 200827      | 197452      | rs794728516 | Neutral    | 0.724    | 0.148        | 0.128    |  |
| KCNQ1 | 191 | L   | P   | NM_000218.3(KCNQ1):c.572T>C (p.Leu191Pro) | Congenital long QT syndrome                                                                                      | not provided                                                              | no assertion provided                                | VCV000053071 | 11               | 2570722        | 53071       | 67739       | rs199473401 | Neutral    | 0.7      | 0.202        | 0.098    |  |
| KCNQ1 | 192 | R   | H   | NM_000218.3(KCNQ1):c.575G>A (p.Arg192His) | Arrhythmic Congenital long QT syndrome Long QT syndrome not provided Long QT syndrome 1                          | Conflicting interpretations of pathogenicity(Last reviewed: Apr 15, 2021) | criteria provided, conflicting interpretations       | VCV000067085 | 11               | 2570725        | 67085       | 77981       | rs199472698 | LOF        | 0.778    | 0.094        | 0.128    |  |
| KCNQ1 | 192 | R   | P   | NM_000218.3(KCNQ1):c.575G>C (p.Arg192Pro) | Long QT syndrome Congenital long QT syndrome not provided                                                        | Uncertain significance(Last reviewed: Nov 8, 2019)                        | criteria provided, multiple submitters, no conflicts | VCV000053073 | 11               | 2570725        | 53073       | 67741       | rs199472698 | LOF        | 0.75     | 0.114        | 0.136    |  |
| KCNQ1 | 193 | F   | L   | NM_000218.3(KCNQ1):c.579T>A (p.Phe193Leu) | not provided                                                                                                     | not provided                                                              | no assertion provided                                | VCV000067086 | 11               | 2570729        | 67086       | 77982       | rs199473454 | LOF        | 0.778    | 0.105        | 0.117    |  |
| KCNQ1 | 193 | F   | L   | NM_000218.3(KCNQ1):c.579T>A (p.Phe193Leu) | not provided                                                                                                     | not provided                                                              | no assertion provided                                | VCV000067086 | 11               | 2570729        | 67086       | 77982       | rs199473454 | LOF        | 0.778    | 0.105        | 0.117    |  |
| KCNQ1 | 193 | F   | L   | NM_000218.3(KCNQ1):c.577T>C (p.Phe193Leu) | Long QT syndrome 1                                                                                               | not provided                                                              | no assertion provided                                | VCV000053074 | 11               | 2570727        | 53074       | 67742       | rs397508119 | LOF        | 0.778    | 0.105        | 0.117    |  |
| KCNQ1 | 193 | F   | L   | NM_000218.3(KCNQ1):c.577T>C (p.Phe193Leu) | Long QT syndrome 1                                                                                               | not provided                                                              | no assertion provided                                | VCV000053074 | 11               | 2570727        | 53074       | 67742       | rs397508119 | LOF        | 0.778    | 0.105        | 0.117    |  |
| KCNQ1 | 194 | A   | P   | NM_000218.3(KCNQ1):c.580G>C (p.Ala194Pro) | Congenital long QT syndrome Long QT syndrome not provided                                                        | Uncertain significance(Last reviewed: Aug 22, 2019)                       | criteria provided, multiple submitters, no conflicts | VCV000053075 | 11               | 2570730        | 53075       | 67743       | rs199472699 | Neutral    | 0.729    | 0.168        | 0.103    |  |
| KCNQ1 | 194 | Q   | P   | NM_000218.3(KCNQ1):c.962A>C (p.Gln321Pro) | not provided Long QT syndrome                                                                                    | Uncertain significance(Last reviewed: Oct 8, 2020)                        | criteria provided, multiple submitters, no conflicts | VCV000200829 | 11               | 2583475        | 200829      | 197454      | rs794728518 | LOF        | 0.797    | 0.087        | 0.116    |  |
| KCNQ1 | 195 | R   | P   | NM_000218.3(KCNQ1):c.584G>C (p.Arg195Pro) | Long QT syndrome                                                                                                 | Uncertain significance                                                    | criteria provided, single submitter                  | VCV000684829 | 11               | 2570734        | 684829      | 672420      | rs138362632 | LOF        | 0.874    | 0.035        | 0.092    |  |
| KCNQ1 | 195 | R   | Q   | NM_000218.3(KCNQ1):c.584G>A (p.Arg195Gln) | Cardiovascular phenotype not specified not provided Long QT syndrome Arrhythmia                                  | Conflicting interpretations of pathogenicity(Last reviewed: Apr 20, 2020) | criteria provided, conflicting interpretations       | VCV000067088 | 11               | 2570734        | 67088       | 77984       | rs138362632 | LOF        | 0.884    | 0.031        | 0.085    |  |
| KCNQ1 | 195 | R   | W   | NM_000218.3(KCNQ1):c.583C>T (p.Arg195Trp) | Arrhythmia Congenital long QT syndrome Long                                                                      | Uncertain                                                                 | criteria                                             | VCV000067087 | 11               | 2570733        | 67087       | 77983       | rs150172393 | LOF        | 0.821    | 0.04         | 0.139    |  |

| gene  | pos | aa1 | aa2 | Name                                      | Condition(s)                                                                       | Clinical significance (Last reviewed)               | Review status                                        | Accession    | GRCh38Chromosome | GRCh38Location | VariationID | AlleleID(s) | dbSNP ID     | prediction | prob.LOF | prob.Neutral | prob.GOF |
|-------|-----|-----|-----|-------------------------------------------|------------------------------------------------------------------------------------|-----------------------------------------------------|------------------------------------------------------|--------------|------------------|----------------|-------------|-------------|--------------|------------|----------|--------------|----------|
|       |     |     |     |                                           | QT syndrome                                                                        | significance(Last reviewed: Oct 14, 2020)           | provided, multiple submitters, no conflicts          |              |                  |                |             |             |              |            |          |              |          |
| KCNQ1 | 195 | T   | R   | NM_000218.3(KCNQ1):c.965C>G (p.Thr322Arg) | not provided                                                                       | Pathogenic(Last reviewed: May 17, 2013)             | criteria provided, single submitter                  | VCV000200830 | 11               | 2583478        | 200830      | 197455      | rs199472755  | LOF        | 0.864    | 0.047        | 0.089    |
| KCNQ1 | 196 | K   | Q   | NM_000218.3(KCNQ1):c.586A>C (p.Lys196Gln) | Autosomal dominant KCNQ1-related disease                                           | Uncertain significance(Last reviewed: Aug 25, 2019) | no assertion criteria provided                       | VCV000800853 | 11               | 2570736        | 800853      | 788850      | rs1589956747 | LOF        | 0.864    | 0.049        | 0.087    |
| KCNQ1 | 196 | K   | T   | NM_000218.3(KCNQ1):c.587A>C (p.Lys196Thr) | not provided                                                                       | Uncertain significance(Last reviewed: Jul 9, 2020)  | criteria provided, single submitter                  | VCV000200816 | 11               | 2570737        | 200816      | 197434      | rs794728509  | LOF        | 0.862    | 0.048        | 0.089    |
| KCNQ1 | 197 | P   | H   | NM_000218.3(KCNQ1):c.590C>A (p.Pro197His) | Long QT syndrome                                                                   | Uncertain significance(Last reviewed: Aug 12, 2017) | criteria provided, single submitter                  | VCV000527016 | 11               | 2570740        | 527016      | 526103      | rs200108320  | LOF        | 0.876    | 0.021        | 0.104    |
| KCNQ1 | 197 | P   | L   | NM_000218.3(KCNQ1):c.590C>T (p.Pro197Leu) | Arrhythmia not provided Long QT syndrome                                           | Uncertain significance(Last reviewed: Feb 19, 2021) | criteria provided, multiple submitters, no conflicts | VCV000191476 | 11               | 2570740        | 191476      | 189328      | rs200108320  | LOF        | 0.738    | 0.043        | 0.219    |
| KCNQ1 | 197 | P   | S   | NM_000218.3(KCNQ1):c.589C>T (p.Pro197Ser) | not provided                                                                       | Likely pathogenic(Last reviewed: Aug 2, 2019)       | criteria provided, single submitter                  | VCV000200817 | 11               | 2570739        | 200817      | 197435      | rs794728510  | LOF        | 0.868    | 0.03         | 0.102    |
| KCNQ1 | 197 | V   | F   | NM_000218.3(KCNQ1):c.970G>T (p.Val324Phe) | Arrhythmia                                                                         | Uncertain significance(Last reviewed: Nov 25, 2019) | criteria provided, single submitter                  | VCV000924962 | 11               | 2583483        | 924962      | 911584      | rs1848536066 | LOF        | 0.734    | 0.11         | 0.156    |
| KCNQ1 | 198 | G   | E   | NM_000218.3(KCNQ1):c.974G>A (p.Gly325Glu) | not provided                                                                       | Likely pathogenic(Last reviewed: Aug 14, 2019)      | criteria provided, single submitter                  | VCV000200831 | 11               | 2583487        | 200831      | 197457      | rs794728519  | LOF        | 0.862    | 0.024        | 0.113    |
| KCNQ1 | 198 | G   | R   | NM_000218.3(KCNQ1):c.973G>C (p.Gly325Arg) | Long QT syndrome                                                                   | Pathogenic(Last reviewed: Aug 20, 2018)             | criteria provided, single submitter                  | VCV000660595 | 11               | 2583486        | 660595      | 639910      | rs199472756  | LOF        | 0.867    | 0.02         | 0.113    |
| KCNQ1 | 198 | I   | V   | NM_000218.3(KCNQ1):c.592A>G (p.Ile198Val) | Congenital long QT syndrome not provided                                           | Uncertain significance(Last reviewed: Feb 5, 2021)  | criteria provided, single submitter                  | VCV000067089 | 11               | 2570742        | 67089       | 77985       | rs199472700  | Neutral    | 0.7      | 0.208        | 0.092    |
| KCNQ1 | 199 | S   | A   | NM_000218.3(KCNQ1):c.595T>G (p.Ser199Ala) | Congenital long QT syndrome                                                        | not provided                                        | no assertion provided                                | VCV000067090 | 11               | 2570745        | 67090       | 77986       | rs199472701  | GOF        | 0.557    | 0.115        | 0.328    |
| KCNQ1 | 202 | A   | T   | NM_000218.3(KCNQ1):c.985G>A (p.Ala329Thr) | Cardiovascular phenotype                                                           | Uncertain significance(Last reviewed: Jul 19, 2017) | criteria provided, single submitter                  | VCV000518688 | 11               | 2583498        | 518688      | 510277      | rs543428644  | Neutral    | 0.496    | 0.279        | 0.224    |
| KCNQ1 | 202 | A   | V   | NM_000218.3(KCNQ1):c.986C>T (p.Ala329Val) | Arrhythmia                                                                         | Uncertain significance(Last reviewed: Nov 24, 2020) | criteria provided, single submitter                  | VCV001171771 | 11               | 2583499        | 1171771     | 1160872     | NA           | Neutral    | 0.423    | 0.337        | 0.24     |
| KCNQ1 | 202 | D   | G   | NM_000218.3(KCNQ1):c.605A>G (p.Asp202Gly) | not provided                                                                       | Pathogenic(Last reviewed: Oct 25, 2011)             | criteria provided, single submitter                  | VCV000200895 | 11               | 2571325        | 200895      | 197437      | rs794728569  | LOF        | 0.769    | 0.054        | 0.177    |
| KCNQ1 | 202 | D   | H   | NM_000218.3(KCNQ1):c.604G>C (p.Asp202His) | Congenital long QT syndrome                                                        | not provided                                        | no assertion provided                                | VCV000067092 | 11               | 2570754        | 67092       | 77988       | rs199472702  | LOF        | 0.707    | 0.058        | 0.235    |
| KCNQ1 | 202 | D   | N   | NM_000218.3(KCNQ1):c.604G>A (p.Asp202Asn) | Long QT syndrome not provided Cardiovascular phenotype Congenital long QT syndrome | Pathogenic/Likely pathogenic(Last reviewed: Dec 14, | criteria provided, multiple                          | VCV000053077 | 11               | 2570754        | 53077       | 67745       | rs199472702  | LOF        | 0.779    | 0.057        | 0.164    |

| gene  | pos | aa1 | aa2 | Name                                       | Condition(s)                                                                                                                                              | Clinical significance (Last reviewed)                                     | Review status                                        | Accession    | GRCh38Chromosome | GRCh38Location | VariationID | AlleleID(s) | dbSNP ID     | prediction | prob.LOF | prob.Neutral | prob.GOF |  |
|-------|-----|-----|-----|--------------------------------------------|-----------------------------------------------------------------------------------------------------------------------------------------------------------|---------------------------------------------------------------------------|------------------------------------------------------|--------------|------------------|----------------|-------------|-------------|--------------|------------|----------|--------------|----------|--|
|       |     |     |     |                                            |                                                                                                                                                           | 2020)                                                                     | submitters, no conflicts                             |              |                  |                |             |             |              |            |          |              |          |  |
| KCNQ1 | 203 | L   | P   | NM_000218.3(KCNQ1):c.608T>C (p.Leu203Pro)  | Congenital long QT syndrome Marfan syndrome                                                                                                               | Likely pathogenic(Last reviewed: Sep 30, 2016)                            | criteria provided, single submitter                  | VCV000067093 | 11               | 2571328        | 67093       | 77989       | rs199472823  | LOF        | 0.837    | 0.076        | 0.087    |  |
| KCNQ1 | 204 | I   | F   | NM_000218.3(KCNQ1):c.610A>T (p.Ile204Phe)  | Congenital long QT syndrome                                                                                                                               | not provided                                                              | no assertion provided                                | VCV000053078 | 11               | 2571330        | 53078       | 67746       | rs199472703  | Neutral    | 0.647    | 0.258        | 0.094    |  |
| KCNQ1 | 204 | I   | M   | NM_000218.3(KCNQ1):c.612C>G (p.Ile204Met)  | not provided Long QT syndrome Congenital long QT syndrome                                                                                                 | Conflicting interpretations of pathogenicity(Last reviewed: Mar 19, 2020) | criteria provided, conflicting interpretations       | VCV000053079 | 11               | 2571332        | 53079       | 67747       | rs199473455  | Neutral    | 0.616    | 0.3          | 0.084    |  |
| KCNQ1 | 205 | V   | M   | NM_000218.3(KCNQ1):c.613G>A (p.Val205Met)  | Long QT syndrome Congenital long QT syndrome not provided Long QT syndrome 1  Cardiovascular phenotype                                                    | Pathogenic(Last reviewed: Oct 27, 2021)                                   | criteria provided, multiple submitters, no conflicts | VCV000037255 | 11               | 2571333        | 37255       | 45847       | rs151344631  | Neutral    | 0.516    | 0.34         | 0.144    |  |
| KCNQ1 | 207 | V   | M   | NM_000218.3(KCNQ1):c.619G>A (p.Val207Met)  | not specified Arrhythmia Long QT syndrome not provided                                                                                                    | Likely benign(Last reviewed: May 12, 2021)                                | criteria provided, multiple submitters, no conflicts | VCV000042492 | 11               | 2571339        | 42492       | 51662       | rs75813654   | Neutral    | 0.475    | 0.414        | 0.111    |  |
| KCNQ1 | 209 | S   | F   | NM_000218.3(KCNQ1):c.626C>T (p.Ser209Phe)  | Congenital long QT syndrome                                                                                                                               | not provided                                                              | no assertion provided                                | VCV000053080 | 11               | 2571346        | 53080       | 67748       | rs199472704  | GOF        | 0.438    | 0.093        | 0.469    |  |
| KCNQ1 | 209 | S   | P   | NM_000218.3(KCNQ1):c.625T>C (p.Ser209Pro)  | Atrial fibrillation, familial, 3 Atrial fibrillation  Long QT syndrome                                                                                    | Pathogenic(Last reviewed: Jun 24, 2016)                                   | criteria provided, single submitter                  | VCV000067094 | 11               | 2571345        | 67094       | 77990       | rs199472705  | GOF        | 0.604    | 0.096        | 0.3      |  |
| KCNQ1 | 210 | I   | F   | NM_000218.3(KCNQ1):c.1009A>T (p.Ile337Phe) | Long QT syndrome not provided                                                                                                                             | Conflicting interpretations of pathogenicity(Last reviewed: Apr 17, 2019) | criteria provided, conflicting interpretations       | VCV000200832 | 11               | 2583522        | 200832      | 197459      | rs794728520  | Neutral    | 0.584    | 0.301        | 0.115    |  |
| KCNQ1 | 210 | I   | M   | NM_000218.3(KCNQ1):c.1011C>G (p.Ile337Met) | not provided                                                                                                                                              | Uncertain significance(Last reviewed: Feb 3, 2013)                        | criteria provided, single submitter                  | VCV000200833 | 11               | 2583524        | 200833      | 197460      | rs794728521  | Neutral    | 0.55     | 0.349        | 0.102    |  |
| KCNQ1 | 210 | M   | T   | NM_000218.3(KCNQ1):c.629T>C (p.Met210Thr)  | Cardiovascular phenotype                                                                                                                                  | Uncertain significance(Last reviewed: May 6, 2015)                        | criteria provided, single submitter                  | VCV000263972 | 11               | 2571349        | 263972      | 258691      | rs886038994  | Neutral    | 0.616    | 0.247        | 0.137    |  |
| KCNQ1 | 210 | M   | V   | NM_000218.3(KCNQ1):c.628A>G (p.Met210Val)  | Arrhythmia                                                                                                                                                | Uncertain significance(Last reviewed: Jan 8, 2020)                        | criteria provided, single submitter                  | VCV000922727 | 11               | 2571348        | 922727      | 911558      | rs1848330783 | Neutral    | 0.485    | 0.391        | 0.124    |  |
| KCNQ1 | 214 | C   | W   | NM_000218.3(KCNQ1):c.642C>G (p.Cys214Trp)  | Long QT syndrome                                                                                                                                          | Uncertain significance(Last reviewed: Aug 24, 2019)                       | criteria provided, single submitter                  | VCV000942858 | 11               | 2571362        | 942858      | 935470      | rs775479779  | LOF        | 0.773    | 0.046        | 0.181    |  |
| KCNQ1 | 215 | V   | G   | NM_000218.3(KCNQ1):c.644T>G (p.Val215Gly)  | Long QT syndrome 1 Atrial fibrillation, familial, 3 Beckwith-Wiedemann syndrome Short QT syndrome 2 Jervell and Lange-Nielsen syndrome 1 Long QT syndrome | Uncertain significance(Last reviewed: Oct 31, 2018)                       | criteria provided, multiple submitters, no conflicts | VCV000456868 | 11               | 2571364        | 456868      | 461128      | rs368011737  | LOF        | 0.796    | 0.098        | 0.106    |  |
| KCNQ1 | 215 | V   | M   | NM_000218.3(KCNQ1):c.643G>A (p.Val215Met)  | Long QT syndrome not provided Congenital long QT syndrome                                                                                                 | Uncertain significance(Last reviewed: May 18, 2021)                       | criteria provided, multiple submitters, no conflicts | VCV000053081 | 11               | 2571363        | 53081       | 67749       | rs17215479   | Neutral    | 0.476    | 0.405        | 0.119    |  |
| KCNQ1 | 217 | A   | G   | NM_000218.3(KCNQ1):c.1031C>G (p.Ala344Gly) | not provided                                                                                                                                              | Likely pathogenic(Last reviewed: Mar 19, 2020)                            | criteria provided, single submitter                  | VCV000200900 | 11               | 2583544        | 200900      | 197463      | rs199472763  | LOF        | 0.827    | 0.074        | 0.1      |  |

| gene  | pos | aa1 | aa2 | Name                                       | Condition(s)                                                                                                                   | Clinical significance (Last reviewed)                                     | Review status                                        | Accession    | GRCh38Chromosome | GRCh38Location | VariationID | AlleleID(s) | dbSNP ID     | prediction | prob.LOF | prob.Neutral | prob.GOF |
|-------|-----|-----|-----|--------------------------------------------|--------------------------------------------------------------------------------------------------------------------------------|---------------------------------------------------------------------------|------------------------------------------------------|--------------|------------------|----------------|-------------|-------------|--------------|------------|----------|--------------|----------|
|       |     |     |     |                                            |                                                                                                                                | reviewed: Jul 5, 2016)                                                    | submitter                                            |              |                  |                |             |             |              |            |          |              |          |
| KCNQ1 | 217 | A   | T   | NM_000218.3(KCNQ1):c.1030G>A (p.Ala344Thr) | not provided                                                                                                                   | Likely pathogenic(Last reviewed: Apr 8, 2019)                             | criteria provided, single submitter                  | VCV000449042 | 11               | 2583543        | 449042      | 444786      | rs1554894481 | LOF        | 0.751    | 0.124        | 0.125    |
| KCNQ1 | 217 | S   | F   | NM_000218.3(KCNQ1):c.650C>T (p.Ser217Phe)  | short QT syndrome Jervell and Lange-Nielsen syndrome Familial atrial fibrillation Congenital long QT syndrome Long QT syndrome | Uncertain significance(Last reviewed: Jun 14, 2016)                       | criteria provided, single submitter                  | VCV000304217 | 11               | 2571370        | 304217      | 327120      | rs886048163  | LOF        | 0.727    | 0.088        | 0.184    |
| KCNQ1 | 218 | G   | R   | NM_000218.3(KCNQ1):c.1033G>A (p.Gly345Arg) | Long QT syndrome not provided                                                                                                  | Pathogenic(Last reviewed: Jun 16, 2020)                                   | criteria provided, single submitter                  | VCV000200837 | 11               | 2585212        | 200837      | 197468      | rs199473471  | LOF        | 0.877    | 0.026        | 0.097    |
| KCNQ1 | 218 | K   | E   | NM_000218.3(KCNQ1):c.652A>G (p.Lys218Glu)  | Torsades de pointes not provided                                                                                               | Uncertain significance(Last reviewed: Nov 6, 2017)                        | criteria provided, single submitter                  | VCV000067095 | 11               | 2571372        | 67095       | 77991       | rs36210419   | LOF        | 0.883    | 0.03         | 0.087    |
| KCNQ1 | 218 | K   | T   | NM_000218.3(KCNQ1):c.653A>C (p.Lys218Thr)  | Arrhythmia                                                                                                                     | Uncertain significance(Last reviewed: Jul 20, 2019)                       | criteria provided, single submitter                  | VCV000925518 | 11               | 2571373        | 925518      | 911560      | rs1848331549 | LOF        | 0.874    | 0.038        | 0.088    |
| KCNQ1 | 220 | Q   | K   | NM_000218.3(KCNQ1):c.658C>A (p.Gln220Lys)  | Arrhythmia                                                                                                                     | Uncertain significance(Last reviewed: Oct 17, 2019)                       | criteria provided, single submitter                  | VCV000927874 | 11               | 2571378        | 927874      | 911561      | rs755789171  | LOF        | 0.807    | 0.054        | 0.139    |
| KCNQ1 | 223 | G   | V   | NM_000218.3(KCNQ1):c.1049G>T (p.Gly350Val) | Long QT syndrome not provided                                                                                                  | Likely pathogenic(Last reviewed: Dec 9, 2016)                             | criteria provided, multiple submitters, no conflicts | VCV000200838 | 11               | 2585228        | 200838      | 197469      | rs794728524  | LOF        | 0.81     | 0.032        | 0.158    |
| KCNQ1 | 224 | F   | L   | NM_000218.3(KCNQ1):c.1051T>C (p.Phe351Leu) | Long QT syndrome 1 not provided                                                                                                | Uncertain significance(Last reviewed: Jan 9, 2020)                        | criteria provided, single submitter                  | VCV000207968 | 11               | 2585230        | 207968      | 204200      | rs779383393  | LOF        | 0.787    | 0.082        | 0.131    |
| KCNQ1 | 224 | T   | M   | NM_000218.3(KCNQ1):c.671C>T (p.Thr224Met)  | Long QT syndrome Arrhythmia Congenital long QT syndrome                                                                        | Pathogenic/Likely pathogenic(Last reviewed: Feb 24, 2021)                 | criteria provided, multiple submitters, no conflicts | VCV000067096 | 11               | 2571391        | 67096       | 77992       | rs199472706  | LOF        | 0.719    | 0.059        | 0.221    |
| KCNQ1 | 225 | S   | L   | NM_000218.3(KCNQ1):c.674C>T (p.Ser225Leu)  | not provided Long QT syndrome 1 Long QT syndrome Congenital long QT syndrome Arrhythmia                                        | Pathogenic/Likely pathogenic(Last reviewed: Oct 28, 2020)                 | criteria provided, multiple submitters, no conflicts | VCV000053083 | 11               | 2571394        | 53083       | 67751       | rs199473456  | GOF        | 0.649    | 0.059        | 0.292    |
| KCNQ1 | 226 | A   | V   | NM_000218.3(KCNQ1):c.677C>T (p.Ala226Val)  | Congenital long QT syndrome not provided Long QT syndrome                                                                      | Uncertain significance(Last reviewed: Oct 29, 2018)                       | criteria provided, multiple submitters, no conflicts | VCV000067097 | 11               | 2571397        | 67097       | 77993       | rs199472707  | LOF        | 0.774    | 0.115        | 0.111    |
| KCNQ1 | 229 | G   | D   | NM_000218.3(KCNQ1):c.686G>A (p.Gly229Asp)  | Atrial fibrillation, familial, 3 not provided  Congenital long QT syndrome Long QT syndrome                                    | Conflicting interpretations of pathogenicity(Last reviewed: May 26, 2020) | criteria provided, conflicting interpretations       | VCV000053085 | 11               | 2572015        | 53085       | 67753       | rs199472708  | LOF        | 0.92     | 0.015        | 0.065    |
| KCNQ1 | 230 | Q   | E   | NM_000218.3(KCNQ1):c.1069C>G (p.Gln357Glu) | Long QT syndrome                                                                                                               | Uncertain significance(Last reviewed: Dec 29, 2017)                       | criteria provided, single submitter                  | VCV000526978 | 11               | 2585248        | 526978      | 526549      | rs1554894743 | LOF        | 0.903    | 0.018        | 0.079    |
| KCNQ1 | 230 | Q   | H   | NM_000218.2(KCNQ1):c.1071G>Y (p.Gln357His) | Congenital long QT syndrome                                                                                                    | not provided                                                              | no assertion provided                                | VCV000132649 | 11               | 2585250        | 132649      | 136397      | rs758766691  | LOF        | 0.888    | 0.021        | 0.091    |
| KCNQ1 | 231 | R   | C   | NM_000218.3(KCNQ1):c.691C>T (p.Arg231Cys)  | Congenital long QT syndrome Long QT syndrome 1 Long QT syndrome not provided                                                   | Pathogenic/Likely pathogenic(Last reviewed: Jul 5, 2016)                  | criteria provided, single submitter                  | VCV000053086 | 11               | 2572020        | 53086       | 67754       | rs199473457  | LOF        | 0.905    | 0.011        | 0.084    |

| gene  | pos | aa1 | aa2 | Name                                       | Condition(s)                                                                                                                                                                                                                                              | Clinical significance (Last reviewed)                                     | Review status                                        | Accession    | GRCh38Chromosome | GRCh38Location | VariationID | AlleleID(s) | dbSNP ID     | prediction | prob.LOF | prob.Neutral | prob.GOF |
|-------|-----|-----|-----|--------------------------------------------|-----------------------------------------------------------------------------------------------------------------------------------------------------------------------------------------------------------------------------------------------------------|---------------------------------------------------------------------------|------------------------------------------------------|--------------|------------------|----------------|-------------|-------------|--------------|------------|----------|--------------|----------|
|       |     |     |     |                                            |                                                                                                                                                                                                                                                           | reviewed: Oct 1, 2021)                                                    | multiple submitters, no conflicts                    |              |                  |                |             |             |              |            |          |              |          |
| KCNQ1 | 231 | R   | H   | NM_000218.3(KCNQ1):c.692G>A (p.Arg231His)  | Atrial fibrillation, familial, 3 Long QT syndrome  Atrial fibrillation, familial, 3 Beckwith-Wiedemann syndrome Long QT syndrome 1  Jervell and Lange-Nielsen syndrome 1 Short QT syndrome 2 not provided Long QT syndrome 1  Congenital long QT syndrome | Pathogenic(Last reviewed: Dec 8, 2020)                                    | criteria provided, multiple submitters, no conflicts | VCV000053087 | 11               | 2572021        | 53087       | 67755       | rs199472709  | LOF        | 0.889    | 0.011        | 0.1      |
| KCNQ1 | 232 | Q   | P   | NM_000218.3(KCNQ1):c.1076A>C (p.Gln359Pro) | not provided                                                                                                                                                                                                                                              | Likely pathogenic(Last reviewed: Jun 3, 2015)                             | criteria provided, single submitter                  | VCV000427114 | 11               | 2585255        | 427114      | 415265      | rs1085307965 | LOF        | 0.898    | 0.022        | 0.08     |
| KCNQ1 | 233 | R   | K   | NM_000218.3(KCNQ1):c.1079G>A (p.Arg360Lys) | Arrhythmia                                                                                                                                                                                                                                                | Uncertain significance(Last reviewed: Oct 14, 2020)                       | criteria provided, single submitter                  | VCV001172261 | 11               | 2585258        | 1172261     | 1160873     | NA           | LOF        | 0.87     | 0.033        | 0.098    |
| KCNQ1 | 233 | R   | W   | NM_000218.3(KCNQ1):c.1078A>T (p.Arg360Trp) | not provided                                                                                                                                                                                                                                              | Likely pathogenic(Last reviewed: Feb 26, 2018)                            | criteria provided, single submitter                  | VCV000200839 | 11               | 2585257        | 200839      | 197470      | rs199473406  | LOF        | 0.817    | 0.025        | 0.158    |
| KCNQ1 | 235 | I   | N   | NM_000218.3(KCNQ1):c.704T>A (p.Ile235Asn)  | Congenital long QT syndrome Long QT syndrome Arrhythmia                                                                                                                                                                                                   | Pathogenic(Last reviewed: Aug 31, 2021)                                   | criteria provided, multiple submitters, no conflicts | VCV000053088 | 11               | 2572033        | 53088       | 67756       | rs199472710  | LOF        | 0.909    | 0.014        | 0.077    |
| KCNQ1 | 239 | L   | P   | NM_000218.3(KCNQ1):c.716T>C (p.Leu239Pro)  | Congenital long QT syndrome                                                                                                                                                                                                                               | not provided                                                              | no assertion provided                                | VCV000053089 | 11               | 2572045        | 53089       | 67757       | rs199473458  | LOF        | 0.836    | 0.082        | 0.082    |
| KCNQ1 | 239 | R   | L   | NM_000218.3(KCNQ1):c.1097G>T (p.Arg366Leu) | not provided                                                                                                                                                                                                                                              | Likely pathogenic(Last reviewed: Jan 13, 2020)                            | criteria provided, single submitter                  | VCV001185948 | 11               | 2585276        | 1185948     | 1177444     | NA           | LOF        | 0.792    | 0.043        | 0.164    |
| KCNQ1 | 240 | Q   | H   | NM_000218.3(KCNQ1):c.1101G>C (p.Gln367His) | not provided                                                                                                                                                                                                                                              | Uncertain significance(Last reviewed: Apr 27, 2021)                       | criteria provided, single submitter                  | VCV001203515 | 11               | 2585280        | 1203515     | 1194487     | NA           | LOF        | 0.878    | 0.016        | 0.106    |
| KCNQ1 | 240 | Q   | R   | NM_000218.3(KCNQ1):c.1100A>G (p.Gln367Arg) | not provided                                                                                                                                                                                                                                              | Uncertain significance(Last reviewed: Oct 7, 2020)                        | criteria provided, single submitter                  | VCV001215084 | 11               | 2585279        | 1215084     | 1205067     | NA           | LOF        | 0.882    | 0.016        | 0.102    |
| KCNQ1 | 241 | V   | G   | NM_000218.3(KCNQ1):c.722T>G (p.Val241Gly)  | Congenital long QT syndrome                                                                                                                                                                                                                               | not provided                                                              | no assertion provided                                | VCV000067098 | 11               | 2572051        | 67098       | 77994       | rs199472711  | LOF        | 0.876    | 0.04         | 0.083    |
| KCNQ1 | 242 | D   | E   | NM_000218.3(KCNQ1):c.726C>A (p.Asp242Glu)  | not provided Long QT syndrome                                                                                                                                                                                                                             | Conflicting interpretations of pathogenicity(Last reviewed: Sep 28, 2021) | criteria provided, conflicting interpretations       | VCV000665471 | 11               | 2572055        | 665471      | 639906      | rs1589957756 | LOF        | 0.913    | 0.02         | 0.066    |
| KCNQ1 | 242 | D   | N   | NM_000218.3(KCNQ1):c.724G>A (p.Asp242Asn)  | Wolff-Parkinson-White pattern Congenital long QT syndrome Long QT syndrome not provided                                                                                                                                                                   | Pathogenic(Last reviewed: Jul 8, 2020)                                    | criteria provided, multiple submitters, no conflicts | VCV000053090 | 11               | 2572053        | 53090       | 67758       | rs199472712  | LOF        | 0.907    | 0.028        | 0.065    |
| KCNQ1 | 242 | D   | Y   | NM_000218.3(KCNQ1):c.724G>T (p.Asp242Tyr)  | Congenital long QT syndrome not provided Long QT syndrome                                                                                                                                                                                                 | Likely pathogenic(Last reviewed: Jun 15, 2021)                            | criteria provided, multiple submitters, no conflicts | VCV000067099 | 11               | 2572053        | 67099       | 77995       | rs199472712  | LOF        | 0.846    | 0.034        | 0.12     |
| KCNQ1 | 242 | P   | A   | NM_000218.3(KCNQ1):c.1105C>G (p.Pro369Ala) | Inborn genetic diseases not provided not specified                                                                                                                                                                                                        | Conflicting interpretations of pathogenicity(Last reviewed: Dec 6, 2017)  | criteria provided, conflicting interpretations       | VCV000200840 | 11               | 2585284        | 200840      | 197472      | rs794728525  | LOF        | 0.871    | 0.038        | 0.091    |

| gene  | pos | aa1 | aa2 | Name                                       | Condition(s)                                                                                  | Clinical significance (Last reviewed)                                     | Review status                                        | Accession    | GRCh38Chromosome | GRCh38Location | VariationID | AlleleID(s) | dbSNP ID     | prediction | prob.LOF | prob.Neutral | prob.GOF |
|-------|-----|-----|-----|--------------------------------------------|-----------------------------------------------------------------------------------------------|---------------------------------------------------------------------------|------------------------------------------------------|--------------|------------------|----------------|-------------|-------------|--------------|------------|----------|--------------|----------|
| KCNQ1 | 242 | P   | L   | NM_000218.3(KCNQ1):c.1106C>T (p.Pro369Leu) | not provided                                                                                  | Uncertain significance(Last reviewed: Feb 3, 2022)                        | criteria provided, single submitter                  | VCV001339593 | 11               | 2585285        | 1339593     | 1330759     | NA           | LOF        | 0.819    | 0.042        | 0.139    |
| KCNQ1 | 243 | A   | E   | NM_000218.3(KCNQ1):c.1109C>A (p.Ala370Glu) | Long QT syndrome 1                                                                            | Likely pathogenic(Last reviewed: Sep 10, 2019)                            | criteria provided, single submitter                  | VCV000869435 | 11               | 2585288        | 869435      | 857652      | rs775362401  | LOF        | 0.916    | 0.017        | 0.068    |
| KCNQ1 | 243 | A   | V   | NM_000218.3(KCNQ1):c.1109C>T (p.Ala370Val) | not provided Long QT syndrome Arrhythmia                                                      | Uncertain significance(Last reviewed: Mar 1, 2021)                        | criteria provided, multiple submitters, no conflicts | VCV000629754 | 11               | 2585288        | 629754      | 617855      | rs775362401  | LOF        | 0.88     | 0.04         | 0.08     |
| KCNQ1 | 243 | R   | C   | NM_000218.3(KCNQ1):c.727C>T (p.Arg243Cys)  | not provided Congenital long QT syndrome Long QT syndrome                                     | Pathogenic(Last reviewed: Oct 20, 2020)                                   | criteria provided, multiple submitters, no conflicts | VCV000053091 | 11               | 2572056        | 53091       | 67759       | rs199472713  | LOF        | 0.899    | 0.02         | 0.081    |
| KCNQ1 | 243 | R   | H   | NM_000218.3(KCNQ1):c.728G>A (p.Arg243His)  | Congenital long QT syndrome Arrhythmial Jervell and Lange-Nielsen syndrome 1 Long QT syndrome | Conflicting interpretations of pathogenicity(Last reviewed: Jan 3, 2022)  | criteria provided, conflicting interpretations       | VCV000053092 | 11               | 2572057        | 53092       | 67760       | rs120074196  | LOF        | 0.902    | 0.014        | 0.084    |
| KCNQ1 | 243 | R   | P   | NM_000218.3(KCNQ1):c.728G>C (p.Arg243Pro)  | Long QT syndrome 1/2, digenic Congenital long QT syndrome                                     | Pathogenic(Last reviewed: Sep 1, 2006)                                    | no assertion criteria provided                       | VCV000003150 | 11               | 2572057        | 3150        | 18189       | rs120074196  | LOF        | 0.907    | 0.016        | 0.077    |
| KCNQ1 | 243 | R   | S   | NM_000218.3(KCNQ1):c.727C>A (p.Arg243Ser)  | Congenital long QT syndrome Long QT syndrome                                                  | Uncertain significance(Last reviewed: Oct 26, 2017)                       | criteria provided, single submitter                  | VCV000067100 | 11               | 2572056        | 67100       | 77996       | rs199472713  | LOF        | 0.911    | 0.013        | 0.075    |
| KCNQ1 | 244 | A   | P   | NM_000218.3(KCNQ1):c.1111G>C (p.Ala371Pro) | Long QT syndrome                                                                              | Likely pathogenic(Last reviewed: Sep 13, 2019)                            | criteria provided, single submitter                  | VCV000237221 | 11               | 2585290        | 237221      | 241086      | rs199473412  | LOF        | 0.876    | 0.051        | 0.073    |
| KCNQ1 | 245 | G   | R   | NM_000218.3(KCNQ1):c.733G>A (p.Gly245Arg)  | Long QT syndrome                                                                              | Uncertain significance(Last reviewed: May 12, 2019)                       | criteria provided, single submitter                  | VCV000950580 | 11               | 2572062        | 950580      | 926184      | rs1060500628 | LOF        | 0.88     | 0.022        | 0.098    |
| KCNQ1 | 248 | I   | F   | NM_000218.3(KCNQ1):c.1123A>T (p.Ile375Phe) | not provided                                                                                  | Uncertain significance(Last reviewed: Apr 22, 2020)                       | criteria provided, single submitter                  | VCV000200841 | 11               | 2585302        | 200841      | 197474      | rs794728526  | LOF        | 0.828    | 0.084        | 0.089    |
| KCNQ1 | 248 | W   | C   | NM_000218.3(KCNQ1):c.744G>C (p.Trp248Cys)  | Congenital long QT syndrome                                                                   | not provided                                                              | no assertion provided                                | VCV000067102 | 11               | 2572073        | 67102       | 77998       | rs199472714  | LOF        | 0.917    | 0.017        | 0.066    |
| KCNQ1 | 248 | W   | R   | NM_000218.3(KCNQ1):c.742T>C (p.Trp248Arg)  | Congenital long QT syndrome Long QT syndrome not provided                                     | Conflicting interpretations of pathogenicity(Last reviewed: Aug 24, 2017) | criteria provided, conflicting interpretations       | VCV000067101 | 11               | 2572071        | 67101       | 77997       | rs199473459  | LOF        | 0.89     | 0.019        | 0.09     |
| KCNQ1 | 249 | Q   | E   | NM_000218.3(KCNQ1):c.1126C>G (p.Gln376Glu) | not specified Long QT syndrome                                                                | Uncertain significance(Last reviewed: Sep 11, 2019)                       | criteria provided, multiple submitters, no conflicts | VCV000811417 | 11               | 2585305        | 811417      | 799643      | rs1564825414 | LOF        | 0.808    | 0.043        | 0.148    |
| KCNQ1 | 249 | Q   | H   | NM_000218.3(KCNQ1):c.1128G>T (p.Gln376His) | not specified                                                                                 | Uncertain significance(Last reviewed: Sep 3, 2019)                        | criteria provided, single submitter                  | VCV000928773 | 11               | 2585307        | 928773      | 917084      | rs1848577607 | LOF        | 0.773    | 0.055        | 0.172    |
| KCNQ1 | 250 | L   | H   | NM_000218.3(KCNQ1):c.749T>A (p.Leu250His)  | Congenital long QT syndrome                                                                   | not provided                                                              | no assertion provided                                | VCV000053094 | 11               | 2572078        | 53094       | 67762       | rs199472715  | LOF        | 0.879    | 0.028        | 0.093    |
| KCNQ1 | 250 | L   | P   | NM_000218.3(KCNQ1):c.749T>C                | Congenital long QT syndrome Long QT                                                           | Uncertain                                                                 | criteria                                             | VCV000067103 | 11               | 2572078        | 67103       | 77999       | rs199472715  | LOF        | 0.868    | 0.044        | 0.088    |



| gene  | pos | aa1 | aa2 | Name                                       | Condition(s)                                                                                          | Clinical significance (Last reviewed)               | Review status                                        | Accession    | GRCh38Chromosome | GRCh38Location | VariationID | AlleleID(s) | dbSNP ID                | prediction | prob.LOF | prob.Neutral | prob.GOF |
|-------|-----|-----|-----|--------------------------------------------|-------------------------------------------------------------------------------------------------------|-----------------------------------------------------|------------------------------------------------------|--------------|------------------|----------------|-------------|-------------|-------------------------|------------|----------|--------------|----------|
|       |     |     |     | (p.Leu250Pro)                              | syndrome                                                                                              | significance(Last reviewed: Nov 29, 2019)           | provided, single submitter                           |              |                  |                |             |             |                         |            |          |              |          |
| KCNQ1 | 251 | A   | S   | NM_000218.3(KCNQ1):c.1132G>T (p.Ala378Ser) | Long QT syndrome                                                                                      | Uncertain significance(Last reviewed: Apr 10, 2019) | criteria provided, single submitter                  | VCV000948540 | 11               | 2587573        | 948540      | 926185      | rs756571615             | LOF        | 0.757    | 0.113        | 0.13     |
| KCNQ1 | 251 | L   | P   | NM_000218.3(KCNQ1):c.752T>C (p.Leu251Pro)  | not provided Congenital long QT syndrome Long QT syndrome 1                                           | Pathogenic(Last reviewed: Jun 26, 2020)             | criteria provided, multiple submitters, no conflicts | VCV000053095 | 11               | 2572081        | 53095       | 67763       | rs199472716             | LOF        | 0.838    | 0.063        | 0.099    |
| KCNQ1 | 253 | R   | K   | NM_000218.3(KCNQ1):c.1139G>A (p.Arg380Lys) | Arrhythmia                                                                                            | Uncertain significance(Last reviewed: Nov 17, 2020) | criteria provided, single submitter                  | VCV001171179 | 11               | 2587580        | 1171179     | 1160874     | NA                      | LOF        | 0.85     | 0.021        | 0.129    |
| KCNQ1 | 254 | C   | Y   | NM_000218.3(KCNQ1):c.1142G>A (p.Cys381Tyr) | not provided                                                                                          | Likely pathogenic(Last reviewed: Apr 22, 2013)      | criteria provided, single submitter                  | VCV000200844 | 11               | 2587583        | 200844      | 197476      | rs368507376             | LOF        | 0.822    | 0.027        | 0.151    |
| KCNQ1 | 254 | V   | L   | NM_000218.3(KCNQ1):c.760G>T (p.Val254Leu)  | Cardiovascular phenotype Congenital long QT syndrome                                                  | Likely pathogenic(Last reviewed: Jan 4, 2017)       | criteria provided, single submitter                  | VCV000053096 | 11               | 2572089        | 53096       | 67764       | rs120074179             | LOF        | 0.779    | 0.102        | 0.119    |
| KCNQ1 | 254 | V   | L   | NM_000218.3(KCNQ1):c.760G>T (p.Val254Leu)  | Cardiovascular phenotype Congenital long QT syndrome                                                  | Likely pathogenic(Last reviewed: Jan 4, 2017)       | criteria provided, single submitter                  | VCV000053096 | 11               | 2572089        | 53096       | 67764       | rs120074179             | LOF        | 0.779    | 0.102        | 0.119    |
| KCNQ1 | 254 | V   | L   | NM_000218.3(KCNQ1):c.760G>C (p.Val254Leu)  | Congenital long QT syndrome                                                                           | not provided                                        | no assertion provided                                | VCV000067104 | 11               | 2572089        | 67104       | 78000       | rs120074179             | LOF        | 0.779    | 0.102        | 0.119    |
| KCNQ1 | 254 | V   | L   | NM_000218.3(KCNQ1):c.760G>C (p.Val254Leu)  | Congenital long QT syndrome                                                                           | not provided                                        | no assertion provided                                | VCV000067104 | 11               | 2572089        | 67104       | 78000       | rs120074179             | LOF        | 0.779    | 0.102        | 0.119    |
| KCNQ1 | 254 | V   | M   | NM_000218.2(KCNQ1):c.[1249G>A;760G>A]      | Long QT syndrome 1                                                                                    | Pathogenic(Last reviewed: Mar 1, 2004)              | no assertion criteria provided                       | VCV000444879 | 11 11            | 2572089        | 444879      | 18157 38428 | rs120074179 rs267607197 | LOF        | 0.82     | 0.071        | 0.109    |
| KCNQ1 | 254 | V   | M   | NM_000218.2(KCNQ1):c.[1249G>A;760G>A]      | Long QT syndrome 1                                                                                    | Pathogenic(Last reviewed: Mar 1, 2004)              | no assertion criteria provided                       | VCV000444879 | 11 11            | 2572089        | 444879      | 18157 38428 | rs120074179 rs267607197 | LOF        | 0.82     | 0.071        | 0.109    |
| KCNQ1 | 254 | V   | M   | NM_000218.3(KCNQ1):c.760G>A (p.Val254Met)  | Long QT syndrome Cardiovascular phenotype Long QT syndrome 1 Congenital long QT syndrome not provided | Pathogenic(Last reviewed: Oct 30, 2020)             | criteria provided, multiple submitters, no conflicts | VCV000003118 | 11               | 2572089        | 3118        | 18157       | rs120074179             | LOF        | 0.82     | 0.071        | 0.109    |
| KCNQ1 | 254 | V   | M   | NM_000218.3(KCNQ1):c.760G>A (p.Val254Met)  | Long QT syndrome Cardiovascular phenotype Long QT syndrome 1 Congenital long QT syndrome not provided | Pathogenic(Last reviewed: Oct 30, 2020)             | criteria provided, multiple submitters, no conflicts | VCV000003118 | 11               | 2572089        | 3118        | 18157       | rs120074179             | LOF        | 0.82     | 0.071        | 0.109    |
| KCNQ1 | 258 | H   | N   | NM_000218.3(KCNQ1):c.772C>A (p.His258Asn)  | Congenital long QT syndrome                                                                           | not provided                                        | no assertion provided                                | VCV000053098 | 11               | 2572101        | 53098       | 67766       | rs199472717             | LOF        | 0.799    | 0.04         | 0.161    |
| KCNQ1 | 258 | H   | P   | NM_000218.3(KCNQ1):c.773A>C (p.His258Pro)  | Congenital long QT syndrome not provided                                                              | Pathogenic(Last reviewed: Sep 6, 2019)              | criteria provided, single submitter                  | VCV000067105 | 11               | 2572102        | 67105       | 78001       | rs199472718             | LOF        | 0.801    | 0.046        | 0.153    |
| KCNQ1 | 258 | H   | R   | NM_000218.3(KCNQ1):c.773A>G (p.His258Arg)  | not provided Congenital long QT syndrome                                                              | Likely pathogenic(Last reviewed: May 1, 2019)       | criteria provided, single submitter                  | VCV000053099 | 11               | 2572102        | 53099       | 67767       | rs199472718             | LOF        | 0.779    | 0.033        | 0.188    |
| KCNQ1 | 259 | R   | C   | NM_000218.3(KCNQ1):c.775C>T (p.Arg259Cys)  | Cardiovascular phenotype not provided Long QT syndrome Congenital long QT syndrome Long QT syndrome 1 | Pathogenic(Last reviewed: Dec 23, 2020)             | criteria provided, multiple                          | VCV000053100 | 11               | 2572104        | 53100       | 67768       | rs199472719             | LOF        | 0.871    | 0.022        | 0.107    |

| gene  | pos | aa1 | aa2 | Name                                               | Condition(s)                                                                                                                                                                            | Clinical significance (Last reviewed)                                    | Review status                                        | Accession     | GRCh38Chromosome | GRCh38Location    | VariationID | AlleleID(s) | dbSNP ID     | prediction | prob.LOF | prob.Neutral | prob.GOF |  |
|-------|-----|-----|-----|----------------------------------------------------|-----------------------------------------------------------------------------------------------------------------------------------------------------------------------------------------|--------------------------------------------------------------------------|------------------------------------------------------|---------------|------------------|-------------------|-------------|-------------|--------------|------------|----------|--------------|----------|--|
|       |     |     |     |                                                    |                                                                                                                                                                                         |                                                                          | submitters, no conflicts                             |               |                  |                   |             |             |              |            |          |              |          |  |
| KCNQ1 | 259 | R   | H   | NM_000218.3(KCNQ1):c.776G>A (p.Arg259His)          | Congenital long QT syndrome Long QT syndrome 1 Long QT syndrome Arrhythmic Atrial fibrillation, familial, 3 Long QT syndrome 1 Short QT syndrome 2 KCNQ1-Related Disorders not provided | Conflicting interpretations of pathogenicity(Last reviewed: Jan 5, 2022) | criteria provided, conflicting interpretations       | VCV000053101  | 11               | 2572105           | 53101       | 67769       | rs199472720  | LOF        | 0.808    | 0.032        | 0.16     |  |
| KCNQ1 | 259 | R   | L   | NM_000218.3(KCNQ1):c.776G>T (p.Arg259Leu)          | Congenital long QT syndrome Long QT syndrome not provided                                                                                                                               | Pathogenic(Last reviewed: Dec 28, 2018)                                  | criteria provided, multiple submitters, no conflicts | VCV000053102  | 11               | 2572105           | 53102       | 67770       | rs199472720  | LOF        | 0.766    | 0.047        | 0.188    |  |
| KCNQ1 | 259 | R   | P   | NM_000218.3(KCNQ1):c.776G>C (p.Arg259Pro)          | Long QT syndrome 1                                                                                                                                                                      | Likely pathogenic(Last reviewed: Sep 10, 2019)                           | criteria provided, single submitter                  | VCV0000869436 | 11               | 2572105           | 869436      | 857651      | rs199472720  | LOF        | 0.827    | 0.036        | 0.137    |  |
| KCNQ1 | 261 | E   | D   | NM_000218.3(KCNQ1):c.783G>C (p.Glu261Asp)          | Congenital long QT syndrome Long QT syndrome                                                                                                                                            | Pathogenic(Last reviewed: Sep 19, 2017)                                  | criteria provided, single submitter                  | VCV000053104  | 11               | 2572848           | 53104       | 67772       | rs199472721  | LOF        | 0.877    | 0.024        | 0.099    |  |
| KCNQ1 | 261 | E   | K   | NM_000218.3(KCNQ1):c.781G>A (p.Glu261Lys)          | Congenital long QT syndrome Long QT syndrome                                                                                                                                            | Uncertain significance(Last reviewed: Dec 10, 2018)                      | criteria provided, single submitter                  | VCV000053103  | 11               | 2572846           | 53103       | 67771       | rs199472722  | LOF        | 0.853    | 0.027        | 0.121    |  |
| KCNQ1 | 261 | E   | L   | NM_000218.3(KCNQ1):c.781_782delinsTT (p.Glu261Leu) | Long QT syndrome                                                                                                                                                                        | Pathogenic(Last reviewed: Sep 27, 2017)                                  | criteria provided, single submitter                  | VCV000405253  | 11               | 2572846 - 2572847 | 405253      | 398119      | rs1060500621 | LOF        | 0.792    | 0.048        | 0.16     |  |
| KCNQ1 | 261 | E   | Q   | NM_000218.3(KCNQ1):c.781G>C (p.Glu261Gln)          | Congenital long QT syndrome not provided                                                                                                                                                | Likely pathogenic(Last reviewed: Sep 19, 2016)                           | criteria provided, single submitter                  | VCV000067106  | 11               | 2572846           | 67106       | 78002       | rs199472722  | LOF        | 0.855    | 0.03         | 0.115    |  |
| KCNQ1 | 262 | L   | V   | NM_000218.3(KCNQ1):c.784C>G (p.Leu262Val)          | not provided Congenital long QT syndrome                                                                                                                                                | Uncertain significance(Last reviewed: Oct 17, 2019)                      | criteria provided, single submitter                  | VCV000053105  | 11               | 2572849           | 53105       | 67773       | rs199472723  | LOF        | 0.822    | 0.108        | 0.07     |  |
| KCNQ1 | 262 | S   | A   | NM_000218.3(KCNQ1):c.1165T>G (p.Ser389Ala)         | Long QT syndrome                                                                                                                                                                        | Uncertain significance(Last reviewed: Jul 16, 2018)                      | criteria provided, single submitter                  | VCV0000574906 | 11               | 2587606           | 574906      | 570495      | rs199472772  | LOF        | 0.792    | 0.074        | 0.134    |  |
| KCNQ1 | 262 | S   | D   | NM_000218.3(KCNQ1):c.1165_1166inv (p.Ser389Asp)    | Long QT syndrome                                                                                                                                                                        | Uncertain significance(Last reviewed: Aug 21, 2017)                      | criteria provided, single submitter                  | VCV0000526914 | 11               | 2587606 - 2587607 | 526914      | 526107      | NA           | LOF        | 0.87     | 0.041        | 0.089    |  |
| KCNQ1 | 265 | T   | I   | NM_000218.3(KCNQ1):c.794C>T (p.Thr265Ile)          | not provided Congenital long QT syndrome                                                                                                                                                | Pathogenic(Last reviewed: Jun 28, 2012)                                  | criteria provided, single submitter                  | VCV000053106  | 11               | 2572859           | 53106       | 67774       | rs199472724  | LOF        | 0.809    | 0.06         | 0.13     |  |
| KCNQ1 | 266 | K   | E   | NM_000218.3(KCNQ1):c.1177A>G (p.Lys393Glu)         | Arrhythmia                                                                                                                                                                              | Uncertain significance(Last reviewed: Apr 14, 2019)                      | criteria provided, single submitter                  | VCV0000919675 | 11               | 2587618           | 919675      | 911592      | rs1848611273 | LOF        | 0.925    | 0.014        | 0.061    |  |
| KCNQ1 | 266 | L   | P   | NM_000218.3(KCNQ1):c.797T>C (p.Leu266Pro)          | Cardiovascular phenotype not provided Congenital long QT syndrome Long QT syndrome                                                                                                      | Pathogenic(Last reviewed: Jun 15, 2020)                                  | criteria provided, multiple submitters, no conflicts | VCV000053108  | 11               | 2572862           | 53108       | 67776       | rs199473460  | LOF        | 0.921    | 0.017        | 0.061    |  |
| KCNQ1 | 267 | I   | T   | NM_000218.3(KCNQ1):c.1181T>C (p.Ile394Thr)         | Arrhythmia                                                                                                                                                                              | Uncertain significance(Last reviewed: Dec 2, 2019)                       | criteria provided, single submitter                  | VCV000923338  | 11               | 2587622           | 923338      | 911593      | rs1437113154 | LOF        | 0.904    | 0.027        | 0.069    |  |
| KCNQ1 | 268 | I   | S   | NM_000218.3(KCNQ1):c.803T>G (p.Ile268Ser)          | Congenital long QT syndrome not provided Long QT syndrome                                                                                                                               | Uncertain significance(Last reviewed: May 17,                            | criteria provided, multiple                          | VCV000067107  | 11               | 2572868           | 67107       | 78003       | rs199472725  | LOF        | 0.897    | 0.041        | 0.062    |  |

| gene  | pos | aa1 | aa2 | Name                                       | Condition(s)                                                                                                                                                                                                                        | Clinical significance (Last reviewed)                                     | Review status                                        | Accession    | GRCh38Chromosome | GRCh38Location | VariationID | AlleleID(s) | dbSNP ID     | prediction | prob.LOF | prob.Neutral | prob.GOF |  |
|-------|-----|-----|-----|--------------------------------------------|-------------------------------------------------------------------------------------------------------------------------------------------------------------------------------------------------------------------------------------|---------------------------------------------------------------------------|------------------------------------------------------|--------------|------------------|----------------|-------------|-------------|--------------|------------|----------|--------------|----------|--|
|       |     |     |     |                                            |                                                                                                                                                                                                                                     | 2017)                                                                     | submitters, no conflicts                             |              |                  |                |             |             |              |            |          |              |          |  |
| KCNQ1 | 269 | G   | D   | NM_000218.3(KCNQ1):c.806G>A (p.Gly269Asp)  | Long QT syndrome 1 not provided Congenital long QT syndrome Long QT syndrome                                                                                                                                                        | Pathogenic(Last reviewed: Jul 1, 2021)                                    | criteria provided, multiple submitters, no conflicts | VCV000003145 | 11               | 2572871        | 3145        | 18184       | rs120074194  | LOF        | 0.922    | 0.012        | 0.066    |  |
| KCNQ1 | 269 | G   | S   | NM_000218.3(KCNQ1):c.805G>A (p.Gly269Ser)  | not provided Long QT syndrome Atrial fibrillation, familial, 3 Beckwith-Wiedemann syndrome Short QT syndrome 2 Jervell and Lange-Nielsen syndrome 1 Long QT syndrome 1 not specified Congenital long QT syndrome Long QT syndrome 1 | Pathogenic(Last reviewed: Oct 28, 2020)                                   | criteria provided, multiple submitters, no conflicts | VCV000003144 | 11               | 2572870        | 3144        | 18183       | rs120074193  | LOF        | 0.898    | 0.027        | 0.075    |  |
| KCNQ1 | 270 | R   | Q   | NM_000218.3(KCNQ1):c.1190G>A (p.Arg397Gln) | Long QT syndrome not provided                                                                                                                                                                                                       | Uncertain significance(Last reviewed: Dec 21, 2021)                       | criteria provided, multiple submitters, no conflicts | VCV000372649 | 11               | 2587631        | 372649      | 359874      | rs374090960  | LOF        | 0.918    | 0.015        | 0.067    |  |
| KCNQ1 | 272 | A   | G   | NM_000218.3(KCNQ1):c.1196C>G (p.Ala399Gly) | not provided not specified Arrhythmia                                                                                                                                                                                               | Uncertain significance(Last reviewed: Aug 25, 2020)                       | criteria provided, multiple submitters, no conflicts | VCV000228760 | 11               | 2587637        | 228760      | 230194      | rs876657836  | LOF        | 0.88     | 0.044        | 0.076    |  |
| KCNQ1 | 272 | A   | S   | NM_000218.3(KCNQ1):c.1195G>T (p.Ala399Ser) | Arrhythmia Long QT syndrome Inborn genetic diseases                                                                                                                                                                                 | Uncertain significance(Last reviewed: Nov 17, 2020)                       | criteria provided, multiple submitters, no conflicts | VCV000985535 | 11               | 2587636        | 985535      | 973791      | rs571899254  | LOF        | 0.857    | 0.066        | 0.077    |  |
| KCNQ1 | 272 | A   | V   | NM_000218.3(KCNQ1):c.1196C>T (p.Ala399Val) | Arrhythmia not provided Long QT syndrome                                                                                                                                                                                            | Uncertain significance(Last reviewed: Jun 29, 2021)                       | criteria provided, multiple submitters, no conflicts | VCV000918468 | 11               | 2587637        | 918468      | 911595      | rs876657836  | LOF        | 0.811    | 0.099        | 0.09     |  |
| KCNQ1 | 272 | G   | D   | NM_000218.3(KCNQ1):c.815G>A (p.Gly272Asp)  | Long QT syndrome Congenital long QT syndrome not provided                                                                                                                                                                           | Pathogenic(Last reviewed: Aug 20, 2021)                                   | criteria provided, multiple submitters, no conflicts | VCV000053109 | 11               | 2572880        | 53109       | 67777       | rs199472726  | LOF        | 0.924    | 0.012        | 0.064    |  |
| KCNQ1 | 272 | G   | V   | NM_000218.3(KCNQ1):c.815G>T (p.Gly272Val)  | Congenital long QT syndrome                                                                                                                                                                                                         | not provided                                                              | no assertion provided                                | VCV000067108 | 11               | 2572880        | 67108       | 78004       | rs199472726  | LOF        | 0.871    | 0.03         | 0.099    |  |
| KCNQ1 | 273 | L   | F   | NM_000218.3(KCNQ1):c.817C>T (p.Leu273Phe)  | Cardiovascular phenotype Congenital long QT syndrome not provided Long QT syndrome 1 Long QT syndrome                                                                                                                               | Pathogenic(Last reviewed: Oct 20, 2020)                                   | criteria provided, multiple submitters, no conflicts | VCV000003119 | 11               | 2572882        | 3119        | 18158       | rs120074180  | LOF        | 0.841    | 0.083        | 0.076    |  |
| KCNQ1 | 273 | L   | P   | NM_000218.3(KCNQ1):c.818T>C (p.Leu273Pro)  | Long QT syndrome                                                                                                                                                                                                                    | Uncertain significance(Last reviewed: Sep 20, 2016)                       | criteria provided, single submitter                  | VCV000405254 | 11               | 2572883        | 405254      | 398124      | rs199472727  | LOF        | 0.903    | 0.035        | 0.061    |  |
| KCNQ1 | 273 | L   | R   | NM_000218.3(KCNQ1):c.818T>G (p.Leu273Arg)  | Congenital long QT syndrome                                                                                                                                                                                                         | not provided                                                              | no assertion provided                                | VCV000053110 | 11               | 2572883        | 53110       | 67778       | rs199472727  | LOF        | 0.922    | 0.024        | 0.054    |  |
| KCNQ1 | 273 | P   | A   | NM_000218.3(KCNQ1):c.1198C>G (p.Pro400Ala) | Arrhythmia Long QT syndrome Cardiovascular phenotype                                                                                                                                                                                | Conflicting interpretations of pathogenicity(Last reviewed: Nov 16, 2018) | criteria provided, conflicting interpretations       | VCV000518535 | 11               | 2587639        | 518535      | 510278      | rs1489132337 | LOF        | 0.858    | 0.047        | 0.095    |  |
| KCNQ1 | 274 | I   | V   | NM_000218.3(KCNQ1):c.820A>G (p.Ile274Val)  | Long QT syndrome Short QT syndrome 2 Atrial fibrillation, familial, 3 Jervell and Lange-Nielsen syndrome 1 Congenital long QT syndrome not specified Arrhythmia SUDDEN INFANT DEATH SYNDROME not provided Long QT syndrome 1        | Conflicting interpretations of pathogenicity(Last reviewed: Jul 7, 2021)  | criteria provided, conflicting interpretations       | VCV000067109 | 11               | 2572885        | 67109       | 78005       | rs199472728  | LOF        | 0.856    | 0.061        | 0.083    |  |
| KCNQ1 | 274 | R   | Q   | NM_000218.3(KCNQ1):c.1202G>A               | not specified Long QT syndrome                                                                                                                                                                                                      | Uncertain                                                                 | criteria                                             | VCV000228765 | 11               | 2587643        | 228765      | 230195      | rs542628042  | LOF        | 0.92     | 0.014        | 0.067    |  |

| gene  | pos | aa1 | aa2 | Name                                       | Condition(s)                                                                          | Clinical significance (Last reviewed)                                    | Review status                                        | Accession    | GRCh38Chromosome | GRCh38Location | VariationID | AlleleID(s) | dbSNP ID     | prediction | prob.LOF | prob.Neutral | prob.GOF |
|-------|-----|-----|-----|--------------------------------------------|---------------------------------------------------------------------------------------|--------------------------------------------------------------------------|------------------------------------------------------|--------------|------------------|----------------|-------------|-------------|--------------|------------|----------|--------------|----------|
|       |     |     |     | (p.Arg401Gln)                              |                                                                                       | significance(Last reviewed: Sep 24, 2019)                                | provided, multiple submitters, no conflicts          |              |                  |                |             |             |              |            |          |              |          |
| KCNQ1 | 274 | R   | W   | NM_000218.3(KCNQ1):c.1201C>T (p.Arg401Trp) | not provided not specified Arrhythmic Long QT syndrome                                | Uncertain significance(Last reviewed: Jun 3, 2021)                       | criteria provided, multiple submitters, no conflicts | VCV000200903 | 11               | 2587642        | 200903      | 197478      | rs766616232  | LOF        | 0.883    | 0.014        | 0.103    |
| KCNQ1 | 275 | F   | S   | NM_000218.3(KCNQ1):c.824T>C (p.Phe275Ser)  | Congenital long QT syndrome                                                           | not provided                                                             | no assertion provided                                | VCV000053111 | 11               | 2572889        | 53111       | 67779       | rs199472729  | LOF        | 0.925    | 0.014        | 0.061    |
| KCNQ1 | 275 | S   | N   | NM_000218.3(KCNQ1):c.1205G>A (p.Ser402Asn) | Long QT syndrome                                                                      | Uncertain significance(Last reviewed: Jan 24, 2016)                      | criteria provided, single submitter                  | VCV000237222 | 11               | 2587646        | 237222      | 241087      | rs878853753  | LOF        | 0.915    | 0.018        | 0.067    |
| KCNQ1 | 277 | S   | L   | NM_000218.3(KCNQ1):c.830C>T (p.Ser277Leu)  | Congenital long QT syndrome Cardiovascular phenotype not provided Long QT syndrome    | Pathogenic(Last reviewed: Sep 7, 2020)                                   | criteria provided, multiple submitters, no conflicts | VCV000053116 | 11               | 2572895        | 53116       | 67784       | rs199472730  | LOF        | 0.779    | 0.035        | 0.186    |
| KCNQ1 | 277 | S   | P   | NM_000218.3(KCNQ1):c.829T>C (p.Ser277Pro)  | Congenital long QT syndrome                                                           | not provided                                                             | no assertion provided                                | VCV000067110 | 11               | 2572894        | 67110       | 78006       | rs199473461  | LOF        | 0.856    | 0.025        | 0.119    |
| KCNQ1 | 277 | S   | W   | NM_000218.3(KCNQ1):c.830C>G (p.Ser277Trp)  | Long QT syndrome Congenital long QT syndrome not provided                             | Pathogenic/Likely pathogenic(Last reviewed: Oct 2, 2019)                 | criteria provided, multiple submitters, no conflicts | VCV000053115 | 11               | 2572895        | 53115       | 67783       | rs199472730  | LOF        | 0.817    | 0.015        | 0.168    |
| KCNQ1 | 277 | T   | S   | NM_000218.3(KCNQ1):c.1211C>G (p.Thr404Ser) | Arrhythmia                                                                            | Uncertain significance(Last reviewed: Jan 10, 2019)                      | criteria provided, single submitter                  | VCV000918527 | 11               | 2587652        | 918527      | 911597      | rs1490239200 | LOF        | 0.849    | 0.045        | 0.105    |
| KCNQ1 | 278 | Y   | H   | NM_000218.3(KCNQ1):c.832T>C (p.Tyr278His)  | Congenital long QT syndrome                                                           | not provided                                                             | no assertion provided                                | VCV000067111 | 11               | 2572897        | 67111       | 78007       | rs199472731  | LOF        | 0.909    | 0.023        | 0.067    |
| KCNQ1 | 279 | F   | I   | NM_000218.3(KCNQ1):c.835T>A (p.Phe279Ile)  | Short QT syndrome 2                                                                   | Pathogenic(Last reviewed: Feb 9, 2017)                                   | no assertion criteria provided                       | VCV000375594 | 11               | 2572900        | 375594      | 362405      | rs1057519584 | LOF        | 0.847    | 0.083        | 0.07     |
| KCNQ1 | 280 | V   | E   | NM_000218.3(KCNQ1):c.839T>A (p.Val280Glu)  | Congenital long QT syndrome Arrhythmic Long QT syndrome                               | Uncertain significance(Last reviewed: Jul 29, 2019)                      | criteria provided, multiple submitters, no conflicts | VCV000053117 | 11               | 2572904        | 53117       | 67785       | rs199473462  | LOF        | 0.904    | 0.027        | 0.069    |
| KCNQ1 | 281 | Y   | C   | NM_000218.3(KCNQ1):c.842A>G (p.Tyr281Cys)  | Congenital long QT syndrome                                                           | not provided                                                             | no assertion provided                                | VCV000067112 | 11               | 2572907        | 67112       | 78008       | rs199472732  | LOF        | 0.924    | 0.009        | 0.067    |
| KCNQ1 | 282 | L   | P   | NM_000218.3(KCNQ1):c.845T>C (p.Leu282Pro)  | Congenital long QT syndrome                                                           | not provided                                                             | no assertion provided                                | VCV000067113 | 11               | 2572910        | 67113       | 78009       | rs199472733  | LOF        | 0.874    | 0.057        | 0.069    |
| KCNQ1 | 283 | A   | G   | NM_000218.3(KCNQ1):c.848C>G (p.Ala283Gly)  | Congenital long QT syndrome not provided                                              | Uncertain significance(Last reviewed: Aug 7, 2017)                       | criteria provided, single submitter                  | VCV000067114 | 11               | 2572913        | 67114       | 78010       | rs199473463  | LOF        | 0.813    | 0.079        | 0.108    |
| KCNQ1 | 284 | E   | G   | NM_000218.3(KCNQ1):c.851A>G (p.Glu284Gly)  | Long QT syndrome                                                                      | Uncertain significance(Last reviewed: Nov 11, 2019)                      | criteria provided, single submitter                  | VCV000965412 | 11               | 2572916        | 965412      | 956453      | rs1848362105 | LOF        | 0.861    | 0.036        | 0.103    |
| KCNQ1 | 284 | E   | K   | NM_000218.3(KCNQ1):c.850G>A (p.Glu284Lys)  | Long QT syndrome Congenital long QT syndrome not provided                             | Conflicting interpretations of pathogenicity(Last reviewed: Aug 6, 2020) | criteria provided, conflicting interpretations       | VCV000067115 | 11               | 2572915        | 67115       | 78011       | rs199472734  | LOF        | 0.852    | 0.038        | 0.11     |
| KCNQ1 | 287 | A   | E   | NM_000218.3(KCNQ1):c.860C>A (p.Ala287Glu)  | Congenital long QT syndrome Arrhythmic not specified Cardiovascular phenotype Long QT | Uncertain significance(Last reviewed: Aug 6, 2020)                       | criteria provided, multiple submitters, no conflicts | VCV000053118 | 11               | 2572925        | 53118       | 67786       | rs199472735  | LOF        | 0.801    | 0.054        | 0.146    |

| gene  | pos | aa1 | aa2 | Name                                       | Condition(s)                                                                                                                                                                                 | Clinical significance (Last reviewed)                                     | Review status                                        | Accession    | GRCh38Chromosome | GRCh38Location | VariationID | AlleleID(s) | dbSNP ID     | prediction | prob.LOF | prob.Neutral | prob.GOF |
|-------|-----|-----|-----|--------------------------------------------|----------------------------------------------------------------------------------------------------------------------------------------------------------------------------------------------|---------------------------------------------------------------------------|------------------------------------------------------|--------------|------------------|----------------|-------------|-------------|--------------|------------|----------|--------------|----------|
|       |     |     |     |                                            | syndrome not provided                                                                                                                                                                        | reviewed: Oct 9, 2020)                                                    | multiple submitters, no conflicts                    |              |                  |                |             |             |              |            |          |              |          |
| KCNQ1 | 289 | V   | M   | NM_000218.3(KCNQ1):c.1246G>A (p.Val416Met) | Arrhythmia                                                                                                                                                                                   | Uncertain significance(Last reviewed: Apr 2, 2019)                        | criteria provided, single submitter                  | VCV000926680 | 11               | 2587687        | 926680      | 911601      | rs777546418  | Neutral    | 0.689    | 0.169        | 0.142    |
| KCNQ1 | 290 | E   | K   | NM_000218.3(KCNQ1):c.868G>A (p.Glu290Lys)  | Congenital long QT syndrome not specified Long QT syndrome 1 Arrhythmia Jervell and Lange-Nielsen syndrome 1 Atrial fibrillation, familial, 3 Short QT syndrome 2                            | Uncertain significance(Last reviewed: May 19, 2021)                       | criteria provided, multiple submitters, no conflicts | VCV000053120 | 11               | 2572933        | 53120       | 67788       | rs199473464  | LOF        | 0.843    | 0.052        | 0.105    |
| KCNQ1 | 291 | V   | I   | NM_000218.3(KCNQ1):c.1252G>A (p.Val418Ile) | not provided Arrhythmia                                                                                                                                                                      | Uncertain significance(Last reviewed: Sep 16, 2020)                       | criteria provided, multiple submitters, no conflicts | VCV000927875 | 11               | 2588713        | 927875      | 911603      | rs777347006  | LOF        | 0.807    | 0.09         | 0.104    |
| KCNQ1 | 292 | G   | D   | NM_000218.3(KCNQ1):c.875G>A (p.Gly292Asp)  | Arrhythmia Cardiovascular phenotype Congenital long QT syndrome not provided Long QT syndrome                                                                                                | Uncertain significance(Last reviewed: May 13, 2020)                       | criteria provided, multiple submitters, no conflicts | VCV000067116 | 11               | 2572940        | 67116       | 78012       | rs199472736  | LOF        | 0.875    | 0.045        | 0.079    |
| KCNQ1 | 292 | K   | R   | NM_000218.3(KCNQ1):c.1256A>G (p.Lys419Arg) | Arrhythmia                                                                                                                                                                                   | Uncertain significance(Last reviewed: Oct 26, 2018)                       | criteria provided, single submitter                  | VCV000629983 | 11               | 2588717        | 629983      | 617856      | rs757328965  | LOF        | 0.857    | 0.053        | 0.089    |
| KCNQ1 | 292 | K   | T   | NM_000218.3(KCNQ1):c.1256A>C (p.Lys419Thr) | not provided                                                                                                                                                                                 | Uncertain significance(Last reviewed: May 1, 2017)                        | criteria provided, single submitter                  | VCV000501370 | 11               | 2588717        | 501370      | 492794      | rs757328965  | LOF        | 0.861    | 0.05         | 0.089    |
| KCNQ1 | 293 | R   | C   | NM_000218.3(KCNQ1):c.877C>T (p.Arg293Cys)  | Arrhythmia Cardiovascular phenotype Atrial fibrillation, familial, 3 Congenital long QT syndrome Long QT syndrome not provided Long QT syndrome 1                                            | Conflicting interpretations of pathogenicity(Last reviewed: Jul 26, 2021) | criteria provided, conflicting interpretations       | VCV000067117 | 11               | 2572942        | 67117       | 78013       | rs199472737  | LOF        | 0.745    | 0.139        | 0.116    |
| KCNQ1 | 293 | R   | H   | NM_000218.3(KCNQ1):c.878G>A (p.Arg293His)  | not specified Arrhythmia not provided Long QT syndrome 1                                                                                                                                     | Conflicting interpretations of pathogenicity(Last reviewed: Nov 4, 2020)  | criteria provided, conflicting interpretations       | VCV000067118 | 11               | 2572943        | 67118       | 78014       | rs199473465  | LOF        | 0.722    | 0.152        | 0.126    |
| KCNQ1 | 296 | F   | S   | NM_000218.3(KCNQ1):c.887T>C (p.Phe296Ser)  | Long QT syndrome Congenital long QT syndrome                                                                                                                                                 | Likely pathogenic(Last reviewed: Aug 26, 2020)                            | criteria provided, single submitter                  | VCV000067119 | 11               | 2572952        | 67119       | 78015       | rs199472738  | LOF        | 0.722    | 0.041        | 0.237    |
| KCNQ1 | 297 | G   | S   | NM_000218.3(KCNQ1):c.889G>A (p.Gly297Ser)  | Long QT syndrome not specified not provided                                                                                                                                                  | Uncertain significance(Last reviewed: Jul 27, 2020)                       | criteria provided, multiple submitters, no conflicts | VCV000067120 | 11               | 2572954        | 67120       | 78016       | rs34320941   | LOF        | 0.749    | 0.057        | 0.194    |
| KCNQ1 | 300 | A   | E   | NM_000218.3(KCNQ1):c.899C>A (p.Ala300Glu)  | Long QT syndrome not provided                                                                                                                                                                | Uncertain significance(Last reviewed: Feb 17, 2020)                       | criteria provided, multiple submitters, no conflicts | VCV000405257 | 11               | 2572964        | 405257      | 398596      | rs1001293702 | LOF        | 0.908    | 0.017        | 0.074    |
| KCNQ1 | 300 | A   | T   | NM_000218.3(KCNQ1):c.898G>A (p.Ala300Thr)  | Long QT syndrome Cardiovascular phenotype Atrial fibrillation, familial, 3 Short QT syndrome 2 Long QT syndrome 1 Jervell and Lange-Nielsen syndrome 1 not specified not provided Arrhythmia | Conflicting interpretations of pathogenicity(Last reviewed: Nov 4, 2020)  | criteria provided, conflicting interpretations       | VCV000003128 | 11               | 2572963        | 3128        | 18167       | rs120074187  | LOF        | 0.874    | 0.041        | 0.085    |
| KCNQ1 | 302 | A   | E   | NM_000218.3(KCNQ1):c.905C>A (p.Ala302Glu)  | Long QT syndrome Congenital long QT syndrome not provided                                                                                                                                    | Conflicting interpretations of pathogenicity(Last reviewed: Oct 9, 2020)  | criteria provided, conflicting                       | VCV000067121 | 11               | 2572970        | 67121       | 78017       | rs193922365  | LOF        | 0.918    | 0.014        | 0.068    |

| gene  | pos | aa1 | aa2 | Name                                       | Condition(s)                                                                                                             | Clinical significance (Last reviewed)                     | Review status                                        | Accession    | GRCh38Chromosome | GRCh38Location | VariationID | AlleleID(s) | dbSNP ID     | prediction | prob.LOF | prob.Neutral | prob.GOF |  |
|-------|-----|-----|-----|--------------------------------------------|--------------------------------------------------------------------------------------------------------------------------|-----------------------------------------------------------|------------------------------------------------------|--------------|------------------|----------------|-------------|-------------|--------------|------------|----------|--------------|----------|--|
|       |     |     |     |                                            |                                                                                                                          |                                                           | reviewed: May 30, 2018)                              |              |                  |                |             |             |              |            |          |              |          |  |
| KCNQ1 | 302 | A   | T   | NM_000218.3(KCNQ1):c.904G>A (p.Ala302Thr)  | Congenital long QT syndrome                                                                                              | not provided                                              | no assertion provided                                | VCV000053121 | 11               | 2572969        | 53121       | 67789       | rs199472739  | LOF        | 0.886    | 0.033        | 0.081    |  |
| KCNQ1 | 302 | N   | S   | NM_000218.3(KCNQ1):c.1286A>G (p.Asn429Ser) | not provided Long QT syndrome                                                                                            | Uncertain significance(Last reviewed: Nov 1, 2020)        | criteria provided, multiple submitters, no conflicts | VCV000579711 | 11               | 2588747        | 579711      | 565639      | rs1464968488 | LOF        | 0.911    | 0.014        | 0.075    |  |
| KCNQ1 | 303 | L   | P   | NM_000218.3(KCNQ1):c.908T>C (p.Leu303Pro)  | Congenital long QT syndrome                                                                                              | not provided                                              | no assertion provided                                | VCV000067122 | 11               | 2572973        | 67122       | 78018       | rs199472740  | LOF        | 0.856    | 0.06         | 0.084    |  |
| KCNQ1 | 304 | W   | R   | NM_000218.3(KCNQ1):c.910T>C (p.Trp304Arg)  | Congenital long QT syndrome                                                                                              | not provided                                              | no assertion provided                                | VCV000053122 | 11               | 2572975        | 53122       | 67790       | rs199473466  | LOF        | 0.892    | 0.016        | 0.092    |  |
| KCNQ1 | 305 | T   | I   | NM_000218.3(KCNQ1):c.1295C>T (p.Thr432Ile) | not specified                                                                                                            | Uncertain significance(Last reviewed: Jun 21, 2016)       | criteria provided, single submitter                  | VCV000505109 | 11               | 2588756        | 505109      | 496996      | rs751644427  | LOF        | 0.791    | 0.037        | 0.173    |  |
| KCNQ1 | 305 | W   | R   | NM_000218.3(KCNQ1):c.913T>C (p.Trp305Arg)  | Congenital long QT syndrome                                                                                              | not provided                                              | no assertion provided                                | VCV000053123 | 11               | 2572978        | 53123       | 67791       | rs199472741  | LOF        | 0.904    | 0.011        | 0.085    |  |
| KCNQ1 | 305 | W   | S   | NM_000218.3(KCNQ1):c.914G>C (p.Trp305Ser)  | Long QT syndrome Jervell and Lange-Nielsen syndrome 1 Cardiovascular phenotype  Congenital long QT syndrome not provided | Pathogenic/Likely pathogenic(Last reviewed: Dec 20, 2018) | criteria provided, multiple submitters, no conflicts | VCV000003127 | 11               | 2572979        | 3127        | 18166       | rs120074186  | LOF        | 0.908    | 0.012        | 0.08     |  |
| KCNQ1 | 306 | G   | R   | NM_000218.3(KCNQ1):c.916G>A (p.Gly306Arg)  | not provided Long QT syndrome 1 Congenital long QT syndrome                                                              | Pathogenic(Last reviewed: Aug 3, 2021)                    | criteria provided, single submitter                  | VCV000003115 | 11               | 2572981        | 3115        | 18154       | rs120074181  | LOF        | 0.92     | 0.008        | 0.072    |  |
| KCNQ1 | 306 | G   | R   | NM_000218.3(KCNQ1):c.916G>A (p.Gly306Arg)  | not provided Long QT syndrome 1 Congenital long QT syndrome                                                              | Pathogenic(Last reviewed: Aug 3, 2021)                    | criteria provided, single submitter                  | VCV000003115 | 11               | 2572981        | 3115        | 18154       | rs120074181  | LOF        | 0.92     | 0.008        | 0.072    |  |
| KCNQ1 | 306 | G   | R   | NM_000218.3(KCNQ1):c.916G>C (p.Gly306Arg)  | Congenital long QT syndrome                                                                                              | not provided                                              | no assertion provided                                | VCV000067123 | 11               | 2572981        | 67123       | 78019       | rs120074181  | LOF        | 0.92     | 0.008        | 0.072    |  |
| KCNQ1 | 306 | G   | R   | NM_000218.3(KCNQ1):c.916G>C (p.Gly306Arg)  | Congenital long QT syndrome                                                                                              | not provided                                              | no assertion provided                                | VCV000067123 | 11               | 2572981        | 67123       | 78019       | rs120074181  | LOF        | 0.92     | 0.008        | 0.072    |  |
| KCNQ1 | 306 | G   | V   | NM_000218.3(KCNQ1):c.917G>T (p.Gly306Val)  | Congenital long QT syndrome                                                                                              | not provided                                              | no assertion provided                                | VCV000053125 | 11               | 2572982        | 53125       | 67793       | rs199472742  | LOF        | 0.876    | 0.015        | 0.109    |  |
| KCNQ1 | 307 | V   | L   | NM_000218.3(KCNQ1):c.919G>T (p.Val307Leu)  | Long QT syndrome                                                                                                         | Uncertain significance(Last reviewed: Jul 1, 2020)        | criteria provided, single submitter                  | VCV000859740 | 11               | 2572984        | 859740      | 838238      | rs120074195  | LOF        | 0.789    | 0.078        | 0.133    |  |
| KCNQ1 | 307 | V   | L   | NM_000218.3(KCNQ1):c.919G>T (p.Val307Leu)  | Long QT syndrome                                                                                                         | Uncertain significance(Last reviewed: Jul 1, 2020)        | criteria provided, single submitter                  | VCV000859740 | 11               | 2572984        | 859740      | 838238      | rs120074195  | LOF        | 0.789    | 0.078        | 0.133    |  |
| KCNQ1 | 307 | V   | L   | NM_000218.3(KCNQ1):c.919G>C (p.Val307Leu)  | short QT syndrome Short QT syndrome 2                                                                                    | Pathogenic(Last reviewed: May 25, 2004)                   | no assertion criteria provided                       | VCV000003148 | 11               | 2572984        | 3148        | 18187       | rs120074195  | LOF        | 0.789    | 0.078        | 0.133    |  |
| KCNQ1 | 307 | V   | L   | NM_000218.3(KCNQ1):c.919G>C (p.Val307Leu)  | short QT syndrome Short QT syndrome 2                                                                                    | Pathogenic(Last reviewed: May 25, 2004)                   | no assertion criteria provided                       | VCV000003148 | 11               | 2572984        | 3148        | 18187       | rs120074195  | LOF        | 0.789    | 0.078        | 0.133    |  |
| KCNQ1 | 307 | V   | M   | NM_000218.3(KCNQ1):c.919G>A (p.Val307Met)  | Arrhythmia                                                                                                               | Uncertain significance(Last reviewed: Mar 16, 2019)       | criteria provided, single submitter                  | VCV000922206 | 11               | 2572984        | 922206      | 911581      | rs120074195  | LOF        | 0.827    | 0.061        | 0.112    |  |
| KCNQ1 | 308 | V   | D   | NM_000218.3(KCNQ1):c.923T>A (p.Val308Asp)  | Congenital long QT syndrome                                                                                              | not provided                                              | no assertion provided                                | VCV000053130 | 11               | 2583436        | 53130       | 67798       | rs199473467  | LOF        | 0.913    | 0.014        | 0.073    |  |
| KCNQ1 | 309 | T   | I   | NM_000218.3(KCNQ1):c.926C>T (p.Thr309Ile)  | Long QT syndrome Congenital long QT syndrome                                                                             | Likely pathogenic(Last reviewed: Jul 29, 2020)            | criteria provided, single submitter                  | VCV000053132 | 11               | 2583439        | 53132       | 67800       | rs199472743  | LOF        | 0.803    | 0.032        | 0.165    |  |

| gene  | pos | aa1 | aa2 | Name                                       | Condition(s)                                                                                           | Clinical significance (Last reviewed)                     | Review status                                        | Accession    | GRCh38Chromosome | GRCh38Location | VariationID | AlleleID(s) | dbSNP ID     | prediction | prob.LOF | prob.Neutral | prob.GOF |
|-------|-----|-----|-----|--------------------------------------------|--------------------------------------------------------------------------------------------------------|-----------------------------------------------------------|------------------------------------------------------|--------------|------------------|----------------|-------------|-------------|--------------|------------|----------|--------------|----------|
| KCNQ1 | 309 | T   | R   | NM_000218.3(KCNQ1):c.926C>G (p.Thr309Arg)  | Congenital long QT syndrome                                                                            | not provided                                              | no assertion provided                                | VCV000053131 | 11               | 2583439        | 53131       | 67799       | rs199472743  | LOF        | 0.875    | 0.019        | 0.106    |
| KCNQ1 | 309 | T   | S   | NM_000218.3(KCNQ1):c.925A>T (p.Thr309Ser)  | Congenital long QT syndrome                                                                            | not provided                                              | no assertion provided                                | VCV000068483 | 11               | 2583438        | 68483       | 79375       | rs199473468  | LOF        | 0.848    | 0.039        | 0.113    |
| KCNQ1 | 310 | V   | D   | NM_000218.3(KCNQ1):c.929T>A (p.Val310Asp)  | Congenital long QT syndrome                                                                            | not provided                                              | no assertion provided                                | VCV000067124 | 11               | 2583442        | 67124       | 78020       | rs199472744  | LOF        | 0.896    | 0.023        | 0.08     |
| KCNQ1 | 310 | V   | I   | NM_000218.3(KCNQ1):c.928G>A (p.Val310Ile)  | Congenital long QT syndrome not provided                                                               | Likely pathogenic(Last reviewed: Jul 28, 2017)            | criteria provided, single submitter                  | VCV000053133 | 11               | 2583441        | 53133       | 67801       | rs199472745  | LOF        | 0.818    | 0.076        | 0.106    |
| KCNQ1 | 311 | T   | A   | NM_000218.3(KCNQ1):c.931A>G (p.Thr311Ala)  | Congenital long QT syndrome                                                                            | not provided                                              | no assertion provided                                | VCV000067125 | 11               | 2583444        | 67125       | 78021       | rs199473469  | LOF        | 0.793    | 0.05         | 0.157    |
| KCNQ1 | 311 | T   | I   | NM_000218.3(KCNQ1):c.932C>T (p.Thr311Ile)  | Congenital long QT syndrome                                                                            | not provided                                              | no assertion provided                                | VCV000053134 | 11               | 2583445        | 53134       | 67802       | rs199472746  | LOF        | 0.779    | 0.044        | 0.177    |
| KCNQ1 | 312 | T   | I   | NM_000218.3(KCNQ1):c.935C>T (p.Thr312Ile)  | Long QT syndrome Long QT syndrome 1  Congenital long QT syndrome not provided  Arrhythmia              | Pathogenic/Likely pathogenic(Last reviewed: Jun 15, 2021) | criteria provided, multiple submitters, no conflicts | VCV000003116 | 11               | 2583448        | 3116        | 18155       | rs120074182  | LOF        | 0.906    | 0.017        | 0.077    |
| KCNQ1 | 313 | I   | F   | NM_000218.3(KCNQ1):c.937A>T (p.Ile313Phe)  | Long QT syndrome                                                                                       | Uncertain significance(Last reviewed: Oct 11, 2018)       | criteria provided, single submitter                  | VCV000664353 | 11               | 2583450        | 664353      | 639909      | rs1589965249 | LOF        | 0.903    | 0.022        | 0.075    |
| KCNQ1 | 313 | I   | M   | NM_000218.3(KCNQ1):c.939C>G (p.Ile313Met)  | Congenital long QT syndrome                                                                            | not provided                                              | no assertion provided                                | VCV000053135 | 11               | 2583452        | 53135       | 67803       | rs199472747  | LOF        | 0.906    | 0.02         | 0.074    |
| KCNQ1 | 314 | G   | A   | NM_000218.3(KCNQ1):c.941G>C (p.Gly314Ala)  | Congenital long QT syndrome                                                                            | not provided                                              | no assertion provided                                | VCV000067126 | 11               | 2583454        | 67126       | 78022       | rs199472748  | LOF        | 0.916    | 0.014        | 0.07     |
| KCNQ1 | 314 | G   | C   | NM_000218.3(KCNQ1):c.940G>T (p.Gly314Cys)  | Congenital long QT syndrome                                                                            | not provided                                              | no assertion provided                                | VCV000053137 | 11               | 2583453        | 53137       | 67805       | rs120074184  | LOF        | 0.923    | 0.017        | 0.061    |
| KCNQ1 | 314 | G   | D   | NM_000218.3(KCNQ1):c.941G>A (p.Gly314Asp)  | not provided Congenital long QT syndrome                                                               | Pathogenic(Last reviewed: Jul 9, 2021)                    | criteria provided, single submitter                  | VCV000053138 | 11               | 2583454        | 53138       | 67806       | rs199472748  | LOF        | 0.918    | 0.013        | 0.069    |
| KCNQ1 | 314 | G   | R   | NM_000218.3(KCNQ1):c.940G>C (p.Gly314Arg)  | Cardiovascular phenotype Congenital long QT syndrome                                                   | Pathogenic(Last reviewed: May 12, 2017)                   | criteria provided, single submitter                  | VCV000053136 | 11               | 2583453        | 53136       | 67804       | rs120074184  | LOF        | 0.912    | 0.013        | 0.075    |
| KCNQ1 | 314 | G   | S   | NM_000218.3(KCNQ1):c.940G>A (p.Gly314Ser)  | Long QT syndrome Congenital long QT syndrome not provided Long QT syndrome 1                           | Pathogenic(Last reviewed: Aug 26, 2021)                   | criteria provided, multiple submitters, no conflicts | VCV000003123 | 11               | 2583453        | 3123        | 18162       | rs120074184  | LOF        | 0.914    | 0.013        | 0.073    |
| KCNQ1 | 314 | P   | L   | NM_000218.3(KCNQ1):c.1322C>T (p.Pro441Leu) | Long QT syndrome                                                                                       | Uncertain significance(Last reviewed: Apr 2, 2019)        | no assertion criteria provided                       | VCV000977165 | 11               | 2588783        | 977165      | 965308      | rs1848630761 | LOF        | 0.915    | 0.019        | 0.067    |
| KCNQ1 | 315 | Y   | C   | NM_000218.3(KCNQ1):c.944A>G (p.Tyr315Cys)  | Long QT syndrome Cardiovascular phenotype  not provided Congenital long QT syndrome Long QT syndrome 1 | Pathogenic/Likely pathogenic(Last reviewed: Aug 14, 2020) | criteria provided, multiple submitters, no conflicts | VCV000053140 | 11               | 2583457        | 53140       | 67808       | rs74462309   | LOF        | 0.896    | 0.02         | 0.084    |
| KCNQ1 | 315 | Y   | F   | NM_000218.3(KCNQ1):c.944A>T (p.Tyr315Phe)  | Congenital long QT syndrome                                                                            | not provided                                              | no assertion provided                                | VCV000053141 | 11               | 2583457        | 53141       | 67809       | rs74462309   | LOF        | 0.881    | 0.03         | 0.089    |
| KCNQ1 | 315 | Y   | S   | NM_000218.3(KCNQ1):c.944A>C (p.Tyr315Ser)  | Long QT syndrome Congenital long QT syndrome                                                           | Pathogenic(Last reviewed: Mar 9, 2020)                    | criteria provided, single submitter                  | VCV000053139 | 11               | 2583457        | 53139       | 67807       | rs74462309   | LOF        | 0.884    | 0.016        | 0.1      |
| KCNQ1 | 316 | G   | E   | NM_000218.3(KCNQ1):c.947G>A (p.Gly316Glu)  | Congenital long QT syndrome                                                                            | not provided                                              | no assertion provided                                | VCV000053144 | 11               | 2583460        | 53144       | 67812       | rs199472749  | LOF        | 0.917    | 0.013        | 0.069    |
| KCNQ1 | 316 | G   | R   | NM_000218.3(KCNQ1):c.946G>A (p.Gly316Arg)  | not provided Congenital long QT syndrome Long QT syndrome                                              | Conflicting interpretations of                            | criteria provided,                                   | VCV000053142 | 11               | 2583459        | 53142       | 67810       | rs104894255  | LOF        | 0.914    | 0.013        | 0.073    |

| gene  | pos | aa1 | aa2 | Name                                       | Condition(s)                                                                        | Clinical significance (Last reviewed)                                    | Review status                                        | Accession    | GRCh38Chromosome | GRCh38Location | VariationID | AlleleID(s) | dbSNP ID     | prediction | prob.LOF | prob.Neutral | prob.GOF |
|-------|-----|-----|-----|--------------------------------------------|-------------------------------------------------------------------------------------|--------------------------------------------------------------------------|------------------------------------------------------|--------------|------------------|----------------|-------------|-------------|--------------|------------|----------|--------------|----------|
|       |     |     |     |                                            |                                                                                     | pathogenicity(Last reviewed: Oct 5, 2020)                                | conflicting interpretations                          |              |                  |                |             |             |              |            |          |              |          |
| KCNQ1 | 316 | G   | R   | NM_000218.3(KCNQ1):c.946G>A (p.Gly316Arg)  | not provided Congenital long QT syndrome Long QT syndrome                           | Conflicting interpretations of pathogenicity(Last reviewed: Oct 5, 2020) | criteria provided, conflicting interpretations       | VCV000053142 | 11               | 2583459        | 53142       | 67810       | rs104894255  | LOF        | 0.914    | 0.013        | 0.073    |
| KCNQ1 | 316 | G   | R   | NM_000218.3(KCNQ1):c.946G>C (p.Gly316Arg)  | Congenital long QT syndrome                                                         | not provided                                                             | no assertion provided                                | VCV000053143 | 11               | 2583459        | 53143       | 67811       | rs104894255  | LOF        | 0.914    | 0.013        | 0.073    |
| KCNQ1 | 316 | G   | R   | NM_000218.3(KCNQ1):c.946G>C (p.Gly316Arg)  | Congenital long QT syndrome                                                         | not provided                                                             | no assertion provided                                | VCV000053143 | 11               | 2583459        | 53143       | 67811       | rs104894255  | LOF        | 0.914    | 0.013        | 0.073    |
| KCNQ1 | 316 | G   | V   | NM_000218.3(KCNQ1):c.947G>T (p.Gly316Val)  | Congenital long QT syndrome                                                         | not provided                                                             | no assertion provided                                | VCV000067127 | 11               | 2583460        | 67127       | 78023       | rs199472749  | LOF        | 0.92     | 0.015        | 0.064    |
| KCNQ1 | 316 | I   | V   | NM_000218.3(KCNQ1):c.1327A>G (p.Ile443Val) | Long QT syndrome                                                                    | Uncertain significance(Last reviewed: Oct 24, 2020)                      | criteria provided, single submitter                  | VCV001018531 | 11               | 2588788        | 1018531     | 1009623     | rs1848631038 | LOF        | 0.906    | 0.023        | 0.071    |
| KCNQ1 | 317 | D   | G   | NM_000218.3(KCNQ1):c.950A>G (p.Asp317Gly)  | Long QT syndrome Congenital long QT syndrome not provided                           | Pathogenic/Likely pathogenic(Last reviewed: Aug 5, 2020)                 | criteria provided, multiple submitters, no conflicts | VCV000067129 | 11               | 2583463        | 67129       | 78025       | rs199472750  | LOF        | 0.875    | 0.052        | 0.074    |
| KCNQ1 | 317 | D   | N   | NM_000218.3(KCNQ1):c.949G>A (p.Asp317Asn)  | Long QT syndrome Cardiovascular phenotypel not provided Congenital long QT syndrome | Pathogenic(Last reviewed: Jun 27, 2019)                                  | criteria provided, multiple submitters, no conflicts | VCV000053145 | 11               | 2583462        | 53145       | 67813       | rs199472751  | LOF        | 0.879    | 0.044        | 0.077    |
| KCNQ1 | 317 | D   | Y   | NM_000218.3(KCNQ1):c.949G>T (p.Asp317Tyr)  | Congenital long QT syndrome                                                         | not provided                                                             | no assertion provided                                | VCV000067128 | 11               | 2583462        | 67128       | 78024       | rs199472751  | LOF        | 0.865    | 0.053        | 0.082    |
| KCNQ1 | 318 | K   | N   | NM_000218.3(KCNQ1):c.954G>C (p.Lys318Asn)  | not provided Congenital long QT syndrome                                            | Pathogenic(Last reviewed: Jun 21, 2013)                                  | criteria provided, single submitter                  | VCV000053146 | 11               | 2583467        | 53146       | 67814       | rs199472752  | LOF        | 0.875    | 0.039        | 0.086    |
| KCNQ1 | 319 | D   | E   | NM_000218.3(KCNQ1):c.1338C>A (p.Asp446Glu) | Arrhythmia                                                                          | Likely benign(Last reviewed: Mar 19, 2019)                               | criteria provided, single submitter                  | VCV000926541 | 11               | 2588799        | 926541      | 911612      | rs199472780  | LOF        | 0.861    | 0.029        | 0.11     |
| KCNQ1 | 319 | D   | N   | NM_000218.3(KCNQ1):c.1336G>A (p.Asp446Asn) | Arrhythmia not provided                                                             | Uncertain significance(Last reviewed: Apr 15, 2021)                      | criteria provided, multiple submitters, no conflicts | VCV000200846 | 11               | 2588797        | 200846      | 197481      | rs149089817  | LOF        | 0.844    | 0.039        | 0.117    |
| KCNQ1 | 319 | V   | M   | NM_000218.3(KCNQ1):c.955G>A (p.Val319Met)  | Long QT syndrome                                                                    | Uncertain significance(Last reviewed: Oct 8, 2020)                       | criteria provided, single submitter                  | VCV001044172 | 11               | 2583468        | 1044172     | 1030174     | rs1310931869 | LOF        | 0.757    | 0.086        | 0.157    |
| KCNQ1 | 320 | P   | A   | NM_000218.3(KCNQ1):c.958C>G (p.Pro320Ala)  | Congenital long QT syndrome                                                         | not provided                                                             | no assertion provided                                | VCV000053147 | 11               | 2583471        | 53147       | 67815       | rs199472753  | LOF        | 0.876    | 0.026        | 0.099    |
| KCNQ1 | 320 | P   | H   | NM_000218.3(KCNQ1):c.1340C>A (p.Pro447His) | Cardiovascular phenotypelLong QT syndrome                                           | Uncertain significance(Last reviewed: Sep 10, 2020)                      | criteria provided, multiple submitters, no conflicts | VCV000264157 | 11               | 2588801        | 264157      | 258695      | rs143149582  | LOF        | 0.888    | 0.021        | 0.091    |
| KCNQ1 | 320 | P   | H   | NM_000218.3(KCNQ1):c.1340C>A (p.Pro447His) | Cardiovascular phenotypelLong QT syndrome                                           | Uncertain significance(Last reviewed: Sep 10, 2020)                      | criteria provided, multiple submitters, no conflicts | VCV000264157 | 11               | 2588801        | 264157      | 258695      | rs143149582  | LOF        | 0.888    | 0.021        | 0.091    |
| KCNQ1 | 320 | P   | H   | NM_000218.3(KCNQ1):c.959C>A (p.Pro320His)  | Long QT syndrome Congenital long QT syndrome                                        | Pathogenic(Last reviewed: Aug 26, 2018)                                  | criteria provided, single submitter                  | VCV000053148 | 11               | 2583472        | 53148       | 67816       | rs199473470  | LOF        | 0.888    | 0.021        | 0.091    |



| gene  | pos | aa1 | aa2 | Name                                       | Condition(s)                                                                                                                                           | Clinical significance (Last reviewed)                                     | Review status                                        | Accession    | GRCh38Chromosome | GRCh38Location | VariationID | AlleleID(s) | dbSNP ID     | prediction | prob.LOF | prob.Neutral | prob.GOF |
|-------|-----|-----|-----|--------------------------------------------|--------------------------------------------------------------------------------------------------------------------------------------------------------|---------------------------------------------------------------------------|------------------------------------------------------|--------------|------------------|----------------|-------------|-------------|--------------|------------|----------|--------------|----------|
| KCNQ1 | 320 | P   | H   | NM_000218.3(KCNQ1):c.959C>A (p.Pro320His)  | Long QT syndrome Congenital long QT syndrome                                                                                                           | Pathogenic(Last reviewed: Aug 26, 2018)                                   | criteria provided, single submitter                  | VCV000053148 | 11               | 2583472        | 53148       | 67816       | rs199473470  | LOF        | 0.888    | 0.021        | 0.091    |
| KCNQ1 | 320 | P   | S   | NM_000218.3(KCNQ1):c.958C>T (p.Pro320Ser)  | Long QT syndrome not specified Congenital long QT syndrome not provided                                                                                | Conflicting interpretations of pathogenicity(Last reviewed: Nov 15, 2021) | criteria provided, conflicting interpretations       | VCV000067130 | 11               | 2583471        | 67130       | 78026       | rs199472753  | LOF        | 0.881    | 0.024        | 0.095    |
| KCNQ1 | 321 | P   | Q   | NM_000218.3(KCNQ1):c.1343C>A (p.Pro448Gln) | Long QT syndrome                                                                                                                                       | Uncertain significance(Last reviewed: Aug 25, 2015)                       | criteria provided, single submitter                  | VCV000219923 | 11               | 2588804        | 219923      | 222140      | rs12720449   | LOF        | 0.809    | 0.054        | 0.137    |
| KCNQ1 | 322 | T   | A   | NM_000218.3(KCNQ1):c.964A>G (p.Thr322Ala)  | Long QT syndrome Long QT syndrome 1 not provided Congenital long QT syndrome                                                                           | Pathogenic(Last reviewed: Dec 30, 2020)                                   | criteria provided, multiple submitters, no conflicts | VCV000053149 | 11               | 2583477        | 53149       | 67817       | rs199472754  | LOF        | 0.873    | 0.032        | 0.095    |
| KCNQ1 | 322 | T   | K   | NM_000218.3(KCNQ1):c.965C>A (p.Thr322Lys)  | Long QT syndrome 1 Congenital long QT syndrome                                                                                                         | Likely pathogenic(Last reviewed: May 27, 2019)                            | criteria provided, single submitter                  | VCV000053150 | 11               | 2583478        | 53150       | 67818       | rs199472755  | LOF        | 0.882    | 0.028        | 0.089    |
| KCNQ1 | 322 | T   | M   | NM_000218.3(KCNQ1):c.965C>T (p.Thr322Met)  | not provided Cardiovascular phenotype Long QT syndrome Congenital long QT syndrome                                                                     | Pathogenic(Last reviewed: Nov 4, 2020)                                    | criteria provided, multiple submitters, no conflicts | VCV000053151 | 11               | 2583478        | 53151       | 67819       | rs199472755  | LOF        | 0.865    | 0.037        | 0.098    |
| KCNQ1 | 322 | T   | P   | NM_000218.3(KCNQ1):c.964A>C (p.Thr322Pro)  | Long QT syndrome                                                                                                                                       | Uncertain significance(Last reviewed: Sep 22, 2019)                       | criteria provided, single submitter                  | VCV000960695 | 11               | 2583477        | 960695      | 947394      | rs199472754  | LOF        | 0.886    | 0.033        | 0.081    |
| KCNQ1 | 323 | E   | G   | NM_000218.3(KCNQ1):c.1349A>G (p.Glu450Gly) | Arrhythmia                                                                                                                                             | Uncertain significance(Last reviewed: Feb 17, 2014)                       | criteria provided, single submitter                  | VCV000374106 | 11               | 2588810        | 374106      | 360930      | rs1057518902 | LOF        | 0.833    | 0.072        | 0.095    |
| KCNQ1 | 323 | E   | K   | NM_000218.3(KCNQ1):c.1348G>A (p.Glu450Lys) | Long QT syndrome not provided                                                                                                                          | Conflicting interpretations of pathogenicity(Last reviewed: Oct 20, 2020) | criteria provided, conflicting interpretations       | VCV001002115 | 11               | 2588809        | 1002115     | 994447      | rs148266527  | LOF        | 0.818    | 0.074        | 0.108    |
| KCNQ1 | 325 | G   | R   | NM_000218.3(KCNQ1):c.973G>A (p.Gly325Arg)  | not provided Long QT syndrome Congenital long QT syndrome Long QT syndrome 1                                                                           | Pathogenic(Last reviewed: Aug 28, 2020)                                   | criteria provided, multiple submitters, no conflicts | VCV000053152 | 11               | 2583486        | 53152       | 67820       | rs199472756  | LOF        | 0.89     | 0.01         | 0.1      |
| KCNQ1 | 325 | R   | L   | NM_000218.3(KCNQ1):c.1355G>T (p.Arg452Leu) | not provided                                                                                                                                           | Pathogenic(Last reviewed: Jan 9, 2012)                                    | criteria provided, single submitter                  | VCV000200904 | 11               | 2588816        | 200904      | 197482      | rs145229963  | LOF        | 0.794    | 0.022        | 0.184    |
| KCNQ1 | 330 | S   | F   | NM_000218.3(KCNQ1):c.1370C>T (p.Ser457Phe) | not provided                                                                                                                                           | Uncertain significance(Last reviewed: Nov 25, 2020)                       | criteria provided, single submitter                  | VCV001190302 | 11               | 2588831        | 1190302     | 1180816     | NA           | LOF        | 0.787    | 0.034        | 0.179    |
| KCNQ1 | 331 | C   | Y   | NM_000218.3(KCNQ1):c.992G>A (p.Cys331Tyr)  | Long QT syndrome                                                                                                                                       | Uncertain significance(Last reviewed: Feb 22, 2019)                       | criteria provided, single submitter                  | VCV000835945 | 11               | 2583505        | 835945      | 838240      | rs1848536656 | LOF        | 0.881    | 0.018        | 0.1      |
| KCNQ1 | 332 | D   | N   | NM_000218.3(KCNQ1):c.1375G>A (p.Asp459Asn) | Long QT syndrome Atrial fibrillation, familial, 3  Short QT syndrome 2 not provided Long QT syndrome 1 Jervell and Lange-Nielsen syndrome 1 Arrhythmia | Conflicting interpretations of pathogenicity(Last reviewed: Mar 9, 2021)  | criteria provided, conflicting interpretations       | VCV000628813 | 11               | 2588836        | 628813      | 617858      | rs747704276  | LOF        | 0.92     | 0.016        | 0.064    |
| KCNQ1 | 333 | G   | D   | NM_000218.3(KCNQ1):c.1379G>A (p.Gly460Asp) | not provided Arrhythmia                                                                                                                                | Uncertain significance(Last reviewed:)                                    | criteria provided,                                   | VCV000919916 | 11               | 2588840        | 919916      | 911615      | rs770410327  | LOF        | 0.917    | 0.012        | 0.07     |

| gene  | pos | aa1 | aa2 | Name                                       | Condition(s)                                                                                                                        | Clinical significance (Last reviewed)                     | Review status                                        | Accession    | GRCh38Chromosome | GRCh38Location | VariationID | AlleleID(s) | dbSNP ID    | prediction | prob.LOF | prob.Neutral | prob.GOF |  |
|-------|-----|-----|-----|--------------------------------------------|-------------------------------------------------------------------------------------------------------------------------------------|-----------------------------------------------------------|------------------------------------------------------|--------------|------------------|----------------|-------------|-------------|-------------|------------|----------|--------------|----------|--|
|       |     |     |     |                                            |                                                                                                                                     |                                                           | reviewed: Mar 1, 2021)                               |              |                  |                |             |             |             |            |          |              |          |  |
| KCNQ1 | 335 | F   | L   | NM_000218.3(KCNQ1):c.1003T>C (p.Phe335Leu) | not provided                                                                                                                        | not provided                                              | no assertion provided                                | VCV000067003 | 11               | 2583516        | 67003       | 77899       | rs199472757 | LOF        | 0.854    | 0.076        | 0.07     |  |
| KCNQ1 | 336 | S   | T   | NM_000218.3(KCNQ1):c.1388G>C (p.Ser463Thr) | Long QT syndrome Arrhythmia                                                                                                         | Uncertain significance(Last reviewed: Sep 24, 2020)       | criteria provided, multiple submitters, no conflicts | VCV000526963 | 11               | 2588849        | 526963      | 526552      | rs184636161 | LOF        | 0.869    | 0.031        | 0.099    |  |
| KCNQ1 | 338 | S   | F   | NM_000218.3(KCNQ1):c.1013C>T (p.Ser338Phe) | Long QT syndrome Congenital long QT syndrome                                                                                        | Likely pathogenic(Last reviewed: Sep 26, 2016)            | criteria provided, single submitter                  | VCV000052928 | 11               | 2583526        | 52928       | 67596       | rs199472758 | LOF        | 0.826    | 0.027        | 0.148    |  |
| KCNQ1 | 339 | F   | S   | NM_000218.3(KCNQ1):c.1016T>C (p.Phe339Ser) | not provided Congenital long QT syndrome Long QT syndrome 1                                                                         | Pathogenic/Likely pathogenic(Last reviewed: Jan 27, 2020) | criteria provided, multiple submitters, no conflicts | VCV000052929 | 11               | 2583529        | 52929       | 67597       | rs199472759 | LOF        | 0.926    | 0.014        | 0.06     |  |
| KCNQ1 | 339 | F   | Y   | NM_000218.3(KCNQ1):c.1016T>A (p.Phe339Tyr) | Long QT syndrome 1 Congenital long QT syndrome Long QT syndrome                                                                     | Uncertain significance(Last reviewed: Oct 15, 2018)       | criteria provided, multiple submitters, no conflicts | VCV000067004 | 11               | 2583529        | 67004       | 77900       | rs199472759 | LOF        | 0.902    | 0.029        | 0.069    |  |
| KCNQ1 | 341 | A   | E   | NM_000218.3(KCNQ1):c.1022C>A (p.Ala341Glu) | Cardiovascular phenotype Long QT syndrome Long QT syndrome 1 Long QT syndrome 1/2, digenic Congenital long QT syndrome not provided | Pathogenic(Last reviewed: Jun 10, 2021)                   | criteria provided, multiple submitters, no conflicts | VCV000003120 | 11               | 2583535        | 3120        | 18159       | rs12720459  | LOF        | 0.909    | 0.024        | 0.067    |  |
| KCNQ1 | 341 | A   | G   | NM_000218.3(KCNQ1):c.1022C>G (p.Ala341Gly) | Congenital long QT syndrome not provided                                                                                            | Pathogenic(Last reviewed: May 30, 2013)                   | criteria provided, single submitter                  | VCV000067005 | 11               | 2583535        | 67005       | 77901       | rs12720459  | LOF        | 0.886    | 0.041        | 0.073    |  |
| KCNQ1 | 341 | A   | V   | NM_000218.3(KCNQ1):c.1022C>T (p.Ala341Val) | Long QT syndrome 1 Long QT syndrome Cardiovascular phenotype not provided                                                           | Pathogenic(Last reviewed: Oct 8, 2020)                    | criteria provided, multiple submitters, no conflicts | VCV000003121 | 11               | 2583535        | 3121        | 18160       | rs12720459  | LOF        | 0.825    | 0.088        | 0.087    |  |
| KCNQ1 | 342 | L   | F   | NM_000218.3(KCNQ1):c.1024C>T (p.Leu342Phe) | not provided Cardiovascular phenotype Congenital long QT syndrome Long QT syndrome                                                  | Pathogenic/Likely pathogenic(Last reviewed: Jan 31, 2020) | criteria provided, multiple submitters, no conflicts | VCV000052932 | 11               | 2583537        | 52932       | 67600       | rs199472760 | LOF        | 0.851    | 0.081        | 0.068    |  |
| KCNQ1 | 342 | L   | H   | NM_000218.3(KCNQ1):c.1025T>A (p.Leu342His) | Long QT syndrome                                                                                                                    | Uncertain significance(Last reviewed: Jun 12, 2017)       | criteria provided, single submitter                  | VCV000405269 | 11               | 2583538        | 405269      | 398476      | rs794728522 | LOF        | 0.918    | 0.029        | 0.053    |  |
| KCNQ1 | 343 | P   | L   | NM_000218.3(KCNQ1):c.1028C>T (p.Pro343Leu) | Congenital long QT syndrome                                                                                                         | not provided                                              | no assertion provided                                | VCV000052935 | 11               | 2583541        | 52935       | 67603       | rs199472761 | LOF        | 0.847    | 0.032        | 0.121    |  |
| KCNQ1 | 343 | P   | R   | NM_000218.3(KCNQ1):c.1028C>G (p.Pro343Arg) | Congenital long QT syndrome                                                                                                         | not provided                                              | no assertion provided                                | VCV000052934 | 11               | 2583541        | 52934       | 67602       | rs199472761 | LOF        | 0.928    | 0.012        | 0.06     |  |
| KCNQ1 | 343 | P   | S   | NM_000218.3(KCNQ1):c.1027C>T (p.Pro343Ser) | Congenital long QT syndrome Long QT syndrome                                                                                        | Pathogenic(Last reviewed: Sep 8, 2020)                    | criteria provided, single submitter                  | VCV000052933 | 11               | 2583540        | 52933       | 67601       | rs199472762 | LOF        | 0.907    | 0.024        | 0.069    |  |
| KCNQ1 | 344 | A   | E   | NM_000218.3(KCNQ1):c.1031C>A (p.Ala344Glu) | not specified Long QT syndrome Congenital long QT syndrome Cardiovascular phenotype                                                 | Pathogenic/Likely pathogenic(Last reviewed: Sep 9, 2019)  | criteria provided, multiple submitters, no conflicts | VCV000067006 | 11               | 2583544        | 67006       | 77902       | rs199472763 | LOF        | 0.9      | 0.028        | 0.072    |  |
| KCNQ1 | 344 | A   | V   | NM_000218.3(KCNQ1):c.1031C>T (p.Ala344Val) | not provided Long QT syndrome Congenital long QT syndrome                                                                           | Pathogenic(Last reviewed: Oct 5, 2020)                    | criteria provided, multiple                          | VCV000052936 | 11               | 2583544        | 52936       | 67604       | rs199472763 | LOF        | 0.808    | 0.099        | 0.093    |  |

| gene  | pos | aa1 | aa2 | Name                                       | Condition(s)                                                                                                                                                                                                                                                                                                                                                                                                                                                                                                                                   | Clinical significance (Last reviewed)                                    | Review status                                        | Accession    | GRCh38Chromosome | GRCh38Location | VariationID | AlleleID(s) | dbSNP ID    | prediction | prob.LOF | prob.Neutral | prob.GOF |
|-------|-----|-----|-----|--------------------------------------------|------------------------------------------------------------------------------------------------------------------------------------------------------------------------------------------------------------------------------------------------------------------------------------------------------------------------------------------------------------------------------------------------------------------------------------------------------------------------------------------------------------------------------------------------|--------------------------------------------------------------------------|------------------------------------------------------|--------------|------------------|----------------|-------------|-------------|-------------|------------|----------|--------------|----------|
|       |     |     |     |                                            |                                                                                                                                                                                                                                                                                                                                                                                                                                                                                                                                                |                                                                          | submitters, no conflicts                             |              |                  |                |             |             |             |            |          |              |          |
| KCNQ1 | 345 | G   | E   | NM_000218.3(KCNQ1):c.1034G>A (p.Gly345Glu) | Long QT syndrome 1 Congenital long QT syndrome                                                                                                                                                                                                                                                                                                                                                                                                                                                                                                 | Pathogenic(Last reviewed: Jan 1, 1996)                                   | no assertion criteria provided                       | VCV000003122 | 11               | 2585213        | 3122        | 18161       | rs120074183 | LOF        | 0.923    | 0.011        | 0.066    |
| KCNQ1 | 345 | G   | R   | NM_000218.3(KCNQ1):c.1033G>C (p.Gly345Arg) | Long QT syndrome Congenital long QT syndrome                                                                                                                                                                                                                                                                                                                                                                                                                                                                                                   | Pathogenic(Last reviewed: Aug 6, 2015)                                   | criteria provided, single submitter                  | VCV000052940 | 11               | 2585212        | 52940       | 67608       | rs199473471 | LOF        | 0.925    | 0.011        | 0.065    |
| KCNQ1 | 349 | S   | P   | NM_000218.3(KCNQ1):c.1045T>C (p.Ser349Pro) | Congenital long QT syndrome Long QT syndrome                                                                                                                                                                                                                                                                                                                                                                                                                                                                                                   | Likely pathogenic(Last reviewed: Oct 30, 2017)                           | criteria provided, single submitter                  | VCV000052941 | 11               | 2585224        | 52941       | 67609       | rs199472764 | LOF        | 0.81     | 0.086        | 0.104    |
| KCNQ1 | 349 | S   | W   | NM_000218.3(KCNQ1):c.1046C>G (p.Ser349Trp) | Long QT syndrome not provided Congenital long QT syndrome                                                                                                                                                                                                                                                                                                                                                                                                                                                                                      | Pathogenic/Likely pathogenic(Last reviewed: Apr 3, 2019)                 | criteria provided, multiple submitters, no conflicts | VCV000052942 | 11               | 2585225        | 52942       | 67610       | rs199472765 | LOF        | 0.789    | 0.045        | 0.165    |
| KCNQ1 | 350 | G   | R   | NM_000218.3(KCNQ1):c.1048G>C (p.Gly350Arg) | Congenital long QT syndrome                                                                                                                                                                                                                                                                                                                                                                                                                                                                                                                    | not provided                                                             | no assertion provided                                | VCV000052943 | 11               | 2585227        | 52943       | 67611       | rs199472824 | LOF        | 0.912    | 0.021        | 0.067    |
| KCNQ1 | 350 | G   | R   | NM_000218.3(KCNQ1):c.1048G>C (p.Gly350Arg) | Congenital long QT syndrome                                                                                                                                                                                                                                                                                                                                                                                                                                                                                                                    | not provided                                                             | no assertion provided                                | VCV000052943 | 11               | 2585227        | 52943       | 67611       | rs199472824 | LOF        | 0.912    | 0.021        | 0.067    |
| KCNQ1 | 350 | G   | R   | NM_000218.3(KCNQ1):c.1048G>A (p.Gly350Arg) | Congenital long QT syndrome                                                                                                                                                                                                                                                                                                                                                                                                                                                                                                                    | not provided                                                             | no assertion provided                                | VCV000067007 | 11               | 2585227        | 67007       | 77903       | rs199472824 | LOF        | 0.912    | 0.021        | 0.067    |
| KCNQ1 | 350 | G   | R   | NM_000218.3(KCNQ1):c.1048G>A (p.Gly350Arg) | Congenital long QT syndrome                                                                                                                                                                                                                                                                                                                                                                                                                                                                                                                    | not provided                                                             | no assertion provided                                | VCV000067007 | 11               | 2585227        | 67007       | 77903       | rs199472824 | LOF        | 0.912    | 0.021        | 0.067    |
| KCNQ1 | 351 | F   | S   | NM_000218.3(KCNQ1):c.1052T>C (p.Phe351Ser) | Congenital long QT syndrome                                                                                                                                                                                                                                                                                                                                                                                                                                                                                                                    | not provided                                                             | no assertion provided                                | VCV000052944 | 11               | 2585231        | 52944       | 67612       | rs199473402 | LOF        | 0.76     | 0.149        | 0.092    |
| KCNQ1 | 353 | L   | P   | NM_000218.3(KCNQ1):c.1058T>C (p.Leu353Pro) | Congenital long QT syndrome not provided Long QT syndrome                                                                                                                                                                                                                                                                                                                                                                                                                                                                                      | Uncertain significance(Last reviewed: Dec 3, 2019)                       | criteria provided, multiple submitters, no conflicts | VCV000052945 | 11               | 2585237        | 52945       | 67613       | rs199473403 | Neutral    | 0.625    | 0.281        | 0.094    |
| KCNQ1 | 354 | K   | R   | NM_000218.3(KCNQ1):c.1061A>G (p.Lys354Arg) | Congenital long QT syndrome                                                                                                                                                                                                                                                                                                                                                                                                                                                                                                                    | not provided                                                             | no assertion provided                                | VCV000067008 | 11               | 2585240        | 67008       | 77904       | rs199473404 | Neutral    | 0.71     | 0.195        | 0.095    |
| KCNQ1 | 357 | Q   | R   | NM_000218.3(KCNQ1):c.1070A>G (p.Gln357Arg) | Long QT syndrome Congenital long QT syndrome Arrhythmia                                                                                                                                                                                                                                                                                                                                                                                                                                                                                        | Uncertain significance(Last reviewed: Jul 17, 2020)                      | criteria provided, multiple submitters, no conflicts | VCV000052948 | 11               | 2585249        | 52948       | 67616       | rs199473405 | LOF        | 0.774    | 0.143        | 0.083    |
| KCNQ1 | 360 | R   | G   | NM_000218.3(KCNQ1):c.1078A>G (p.Arg360Gly) | Congenital long QT syndrome                                                                                                                                                                                                                                                                                                                                                                                                                                                                                                                    | not provided                                                             | no assertion provided                                | VCV000067009 | 11               | 2585257        | 67009       | 77905       | rs199473406 | LOF        | 0.767    | 0.146        | 0.087    |
| KCNQ1 | 360 | R   | M   | NM_000218.3(KCNQ1):c.1079G>T (p.Arg360Met) | Congenital long QT syndrome                                                                                                                                                                                                                                                                                                                                                                                                                                                                                                                    | not provided                                                             | no assertion provided                                | VCV000067010 | 11               | 2585258        | 67010       | 77906       | rs199473407 | Neutral    | 0.618    | 0.278        | 0.104    |
| KCNQ1 | 360 | R   | T   | NM_000218.3(KCNQ1):c.1079G>C (p.Arg360Thr) | Congenital long QT syndrome                                                                                                                                                                                                                                                                                                                                                                                                                                                                                                                    | not provided                                                             | no assertion provided                                | VCV000052951 | 11               | 2585258        | 52951       | 67619       | rs199473407 | Neutral    | 0.589    | 0.315        | 0.096    |
| KCNQ1 | 362 | K   | R   | NM_000218.3(KCNQ1):c.1085A>G (p.Lys362Arg) | Long QT syndrome 1 Decreased fetal movement Abnormality of the nares Generalized hypotonia Diffuse white matter abnormalities Enlarged naris Abnormal cerebral white matter morphology Polyhydramnios High palate Primary microcephaly Toe clinodactyly Generalized neonatal hypotonia Neonatal hypotonia Secondary microcephaly not provided Congenital long QT syndrome Arrhythmia Long QT syndrome Atrial fibrillation, familial, 3 Long QT syndrome 1 Short QT syndrome 2 Beckwith-Wiedemann syndrome Jervell and Lange-Nielsen syndrome 1 | Conflicting interpretations of pathogenicity(Last reviewed: Jun 3, 2021) | criteria provided, conflicting interpretations       | VCV000052953 | 11               | 2585264        | 52953       | 67621       | rs12720458  | LOF        | 0.771    | 0.15         | 0.079    |
| KCNQ1 | 363 | H   | N   | NM_000218.3(KCNQ1):c.1087C>A               | Long QT syndrome Congenital long QT                                                                                                                                                                                                                                                                                                                                                                                                                                                                                                            | Conflicting                                                              | criteria                                             | VCV000052954 | 11               | 2585266        | 52954       | 67622       | rs199473408 | Neutral    | 0.728    | 0.199        | 0.074    |

| gene  | pos | aa1 | aa2 | Name                                       | Condition(s)                                                                                          | Clinical significance (Last reviewed)                                     | Review status                                        | Accession    | GRCh38Chromosome | GRCh38Location | VariationID | AlleleID(s) | dbSNP ID     | prediction | prob.LOF | prob.Neutral | prob.GOF |
|-------|-----|-----|-----|--------------------------------------------|-------------------------------------------------------------------------------------------------------|---------------------------------------------------------------------------|------------------------------------------------------|--------------|------------------|----------------|-------------|-------------|--------------|------------|----------|--------------|----------|
|       |     |     |     | (p.His363Asn)                              | syndrome not provided                                                                                 | interpretations of pathogenicity(Last reviewed: May 15, 2019)             | provided, conflicting interpretations                |              |                  |                |             |             |              |            |          |              |          |
| KCNQ1 | 365 | N   | H   | NM_000218.3(KCNQ1):c.1093A>C (p.Asn365His) | Congenital long QT syndrome                                                                           | not provided                                                              | no assertion provided                                | VCV000067011 | 11               | 2585272        | 67011       | 77907       | rs199473409  | Neutral    | 0.704    | 0.222        | 0.074    |
| KCNQ1 | 366 | R   | P   | NM_000218.3(KCNQ1):c.1097G>C (p.Arg366Pro) | Congenital long QT syndrome                                                                           | not provided                                                              | no assertion provided                                | VCV000052957 | 11               | 2585276        | 52957       | 67625       | rs199473410  | LOF        | 0.778    | 0.146        | 0.075    |
| KCNQ1 | 366 | R   | Q   | NM_000218.3(KCNQ1):c.1097G>A (p.Arg366Gln) | not provided Congenital long QT syndrome Long QT syndrome                                             | Pathogenic(Last reviewed: Sep 15, 2021)                                   | criteria provided, multiple submitters, no conflicts | VCV000052956 | 11               | 2585276        | 52956       | 67624       | rs199473410  | LOF        | 0.8      | 0.13         | 0.07     |
| KCNQ1 | 366 | R   | W   | NM_000218.3(KCNQ1):c.1096C>T (p.Arg366Trp) | Cardiovascular phenotype not provided Long QT syndrome Congenital long QT syndrome Long QT syndrome 1 | Pathogenic/Likely pathogenic(Last reviewed: Jan 10, 2022)                 | criteria provided, multiple submitters, no conflicts | VCV000052955 | 11               | 2585275        | 52955       | 67623       | rs199473411  | Neutral    | 0.659    | 0.242        | 0.099    |
| KCNQ1 | 367 | Q   | H   | NM_000218.3(KCNQ1):c.1101G>T (p.Gln367His) | Long QT syndrome Congenital long QT syndrome                                                          | Uncertain significance(Last reviewed: Mar 25, 2018)                       | criteria provided, single submitter                  | VCV000052958 | 11               | 2585280        | 52958       | 67626       | rs199473663  | Neutral    | 0.753    | 0.172        | 0.076    |
| KCNQ1 | 371 | A   | E   | NM_000218.3(KCNQ1):c.1112C>A (p.Ala371Glu) | Long QT syndrome                                                                                      | Uncertain significance(Last reviewed: Aug 20, 2020)                       | criteria provided, single submitter                  | VCV001038475 | 11               | 2585291        | 1038475     | 1030175     | rs1848577150 | LOF        | 0.903    | 0.028        | 0.069    |
| KCNQ1 | 371 | A   | T   | NM_000218.3(KCNQ1):c.1111G>A (p.Ala371Thr) | Congenital long QT syndrome                                                                           | not provided                                                              | no assertion provided                                | VCV000052959 | 11               | 2585290        | 52959       | 67627       | rs199473412  | LOF        | 0.858    | 0.072        | 0.07     |
| KCNQ1 | 372 | A   | D   | NM_000218.3(KCNQ1):c.1115C>A (p.Ala372Asp) | Congenital long QT syndrome                                                                           | not provided                                                              | no assertion provided                                | VCV000052960 | 11               | 2585294        | 52960       | 67628       | rs199473472  | LOF        | 0.848    | 0.075        | 0.077    |
| KCNQ1 | 373 | S   | P   | NM_000218.3(KCNQ1):c.1117T>C (p.Ser373Pro) | Congenital long QT syndrome                                                                           | not provided                                                              | no assertion provided                                | VCV000067012 | 11               | 2585296        | 67012       | 77908       | rs199472766  | Neutral    | 0.739    | 0.17         | 0.091    |
| KCNQ1 | 374 | L   | H   | NM_000218.3(KCNQ1):c.1121T>A (p.Leu374His) | Long QT syndrome not provided Congenital long QT syndrome Arrhythmia Cardiovascular phenotype         | Conflicting interpretations of pathogenicity(Last reviewed: Feb 10, 2021) | criteria provided, conflicting interpretations       | VCV000052961 | 11               | 2585300        | 52961       | 67629       | rs199472767  | LOF        | 0.878    | 0.059        | 0.064    |
| KCNQ1 | 379 | W   | G   | NM_000218.3(KCNQ1):c.1135T>G (p.Trp379Gly) | Congenital long QT syndrome not provided                                                              | Uncertain significance(Last reviewed: Jan 17, 2020)                       | criteria provided, single submitter                  | VCV000067014 | 11               | 2587576        | 67014       | 77910       | rs199472768  | LOF        | 0.917    | 0.023        | 0.06     |
| KCNQ1 | 379 | W   | R   | NM_000218.3(KCNQ1):c.1135T>C (p.Trp379Arg) | SUDDEN INFANT DEATH SYNDROME Long QT syndrome not provided                                            | Conflicting interpretations of pathogenicity(Last reviewed: May 26, 2020) | criteria provided, conflicting interpretations       | VCV000067013 | 11               | 2587576        | 67013       | 77909       | rs199472768  | LOF        | 0.891    | 0.025        | 0.084    |
| KCNQ1 | 379 | W   | S   | NM_000218.3(KCNQ1):c.1136G>C (p.Trp379Ser) | Congenital long QT syndrome                                                                           | not provided                                                              | no assertion provided                                | VCV000067015 | 11               | 2587577        | 67015       | 77911       | rs199472769  | LOF        | 0.903    | 0.028        | 0.07     |
| KCNQ1 | 380 | R   | G   | NM_000218.3(KCNQ1):c.1138A>G (p.Arg380Gly) | Congenital long QT syndrome                                                                           | not provided                                                              | no assertion provided                                | VCV000067016 | 11               | 2587579        | 67016       | 77912       | rs199472770  | LOF        | 0.862    | 0.073        | 0.065    |
| KCNQ1 | 380 | R   | Q   | NM_000218.3(KCNQ1):c.1520G>A (p.Arg507Gln) | Long QT syndrome Arrhythmia Cardiovascular phenotype                                                  | Uncertain significance(Last reviewed: Apr 20, 2021)                       | criteria provided, multiple submitters, no conflicts | VCV000519296 | 11               | 2768849        | 519296      | 510280      | rs369571296  | LOF        | 0.821    | 0.107        | 0.072    |
| KCNQ1 | 380 | R   | S   | NM_000218.3(KCNQ1):c.1140G>T (p.Arg380Ser) | Congenital long QT syndrome Long QT syndrome                                                          | Pathogenic(Last reviewed: Aug 22, 2019)                                   | criteria provided, single submitter                  | VCV000052964 | 11               | 2587581        | 52964       | 67632       | rs199472771  | LOF        | 0.806    | 0.12         | 0.074    |
| KCNQ1 | 380 | R   | W   | NM_000218.3(KCNQ1):c.1138A>T               | Long QT syndrome                                                                                      | Uncertain                                                                 | criteria                                             | VCV000581004 | 11               | 2587579        | 581004      | 564562      | rs199472770  | LOF        | 0.761    | 0.134        | 0.104    |

| gene  | pos | aa1 | aa2 | Name                                       | Condition(s)                                                                                                                                                                                                   | Clinical significance (Last reviewed)                                     | Review status                                        | Accession    | GRCh38Chromosome | GRCh38Location | VariationID | AlleleID(s) | dbSNP ID     | prediction | prob.LOF | prob.Neutral | prob.GOF |
|-------|-----|-----|-----|--------------------------------------------|----------------------------------------------------------------------------------------------------------------------------------------------------------------------------------------------------------------|---------------------------------------------------------------------------|------------------------------------------------------|--------------|------------------|----------------|-------------|-------------|--------------|------------|----------|--------------|----------|
|       |     |     |     | (p.Arg380Trp)                              |                                                                                                                                                                                                                | significance(Last reviewed: Jun 21, 2019)                                 | provided, single submitter                           |              |                  |                |             |             |              |            |          |              |          |
| KCNQ1 | 381 | C   | W   | NM_000218.3(KCNQ1):c.1143C>G (p.Cys381Trp) | Arrhythmia                                                                                                                                                                                                     | Uncertain significance(Last reviewed: Jan 28, 2019)                       | criteria provided, single submitter                  | VCV000928367 | 11               | 2587584        | 928367      | 911588      | rs1848610060 | LOF        | 0.835    | 0.055        | 0.11     |
| KCNQ1 | 383 | H   | P   | NM_000218.3(KCNQ1):c.1529A>C (p.His510Pro) | not provided                                                                                                                                                                                                   | Uncertain significance(Last reviewed: Mar 15, 2019)                       | criteria provided, single submitter                  | VCV001308222 | 11               | 2768858        | 1308222     | 1296843     | NA           | LOF        | 0.797    | 0.124        | 0.079    |
| KCNQ1 | 384 | A   | T   | NM_000218.3(KCNQ1):c.1150G>A (p.Ala384Thr) | Long QT syndrome                                                                                                                                                                                               | Uncertain significance(Last reviewed: Dec 18, 2019)                       | criteria provided, single submitter                  | VCV000842623 | 11               | 2587591        | 842623      | 838242      | rs1848610150 | Neutral    | 0.445    | 0.486        | 0.069    |
| KCNQ1 | 384 | R   | Q   | NM_000218.3(KCNQ1):c.1532G>A (p.Arg511Gln) | Long QT syndrome Arrhythmia                                                                                                                                                                                    | Uncertain significance(Last reviewed: Oct 23, 2019)                       | criteria provided, multiple submitters, no conflicts | VCV000526906 | 11               | 2768861        | 526906      | 526237      | rs753962384  | LOF        | 0.774    | 0.152        | 0.074    |
| KCNQ1 | 385 | E   | K   | NM_000218.3(KCNQ1):c.1153G>A (p.Glu385Lys) | Congenital long QT syndrome Long QT syndrome                                                                                                                                                                   | Uncertain significance(Last reviewed: May 7, 2019)                        | criteria provided, single submitter                  | VCV000067017 | 11               | 2587594        | 67017       | 77913       | rs199473473  | LOF        | 0.781    | 0.145        | 0.073    |
| KCNQ1 | 386 | T   | S   | NM_000218.3(KCNQ1):c.1537A>T (p.Thr513Ser) | not specified                                                                                                                                                                                                  | Uncertain significance(Last reviewed: Mar 5, 2013)                        | no assertion criteria provided                       | VCV000235000 | 11               | 2768866        | 235000      | 236781      | rs778975231  | Neutral    | 0.522    | 0.383        | 0.094    |
| KCNQ1 | 388 | D   | N   | NM_000218.3(KCNQ1):c.1162G>A (p.Asp388Asn) | Arrhythmia not specified                                                                                                                                                                                       | Uncertain significance(Last reviewed: Apr 2, 2020)                        | criteria provided, multiple submitters, no conflicts | VCV000928161 | 11               | 2587603        | 928161      | 911590      | rs537637760  | LOF        | 0.764    | 0.12         | 0.115    |
| KCNQ1 | 388 | K   | N   | NM_000218.3(KCNQ1):c.1545G>T (p.Lys515Asn) | not provided                                                                                                                                                                                                   | Likely pathogenic(Last reviewed: Oct 25, 2013)                            | criteria provided, single submitter                  | VCV000200852 | 11               | 2768874        | 200852      | 197491      | rs794728532  | LOF        | 0.749    | 0.145        | 0.106    |
| KCNQ1 | 389 | S   | P   | NM_000218.3(KCNQ1):c.1165T>C (p.Ser389Pro) | Congenital long QT syndrome                                                                                                                                                                                    | not provided                                                              | no assertion criteria provided                       | VCV000067018 | 11               | 2587606        | 67018       | 77914       | rs199472772  | Neutral    | 0.632    | 0.261        | 0.106    |
| KCNQ1 | 389 | S   | Y   | NM_000218.3(KCNQ1):c.1166C>A (p.Ser389Tyr) | Congenital long QT syndrome not provided                                                                                                                                                                       | Uncertain significance(Last reviewed: Nov 6, 2019)                        | criteria provided, single submitter                  | VCV000052966 | 11               | 2587607        | 52966       | 67634       | rs199472773  | Neutral    | 0.488    | 0.406        | 0.106    |
| KCNQ1 | 391 | T   | I   | NM_000218.3(KCNQ1):c.1172C>T (p.Thr391Ile) | Congenital long QT syndrome                                                                                                                                                                                    | not provided                                                              | no assertion criteria provided                       | VCV000052967 | 11               | 2587613        | 52967       | 67635       | rs199473474  | Neutral    | 0.494    | 0.397        | 0.109    |
| KCNQ1 | 392 | W   | R   | NM_000218.3(KCNQ1):c.1174T>C (p.Trp392Arg) | Congenital long QT syndrome not provided                                                                                                                                                                       | Pathogenic/Likely pathogenic                                              | no assertion criteria provided                       | VCV000067019 | 11               | 2587615        | 67019       | 77915       | rs199472774  | LOF        | 0.87     | 0.036        | 0.095    |
| KCNQ1 | 393 | K   | M   | NM_000218.3(KCNQ1):c.1178A>T (p.Lys393Met) | Long QT syndrome not provided Congenital long QT syndrome Arrhythmia                                                                                                                                           | Conflicting interpretations of pathogenicity(Last reviewed: Oct 11, 2021) | criteria provided, conflicting interpretations       | VCV000052969 | 11               | 2587619        | 52969       | 67637       | rs199472775  | Neutral    | 0.475    | 0.426        | 0.1      |
| KCNQ1 | 393 | K   | N   | NM_000218.3(KCNQ1):c.1179G>T (p.Lys393Asn) | Cardiomyopathy Arrhythmia not specified Short QT syndrome 2 Atrial fibrillation, familial, 3 Jervell and Lange-Nielsen syndrome 1 Long QT syndrome not provided Long QT syndrome 1 Congenital long QT syndrome | Conflicting interpretations of pathogenicity(Last reviewed: Mar 25, 2021) | criteria provided, conflicting interpretations       | VCV000067020 | 11               | 2587620        | 67020       | 77916       | rs12720457   | Neutral    | 0.491    | 0.415        | 0.094    |
| KCNQ1 | 393 | M   | I   | NM_000218.3(KCNQ1):c.1560G>A (p.Met520Ile) | not provided Long QT syndrome                                                                                                                                                                                  | Uncertain significance(Last reviewed: Nov 5, 2020)                        | criteria provided, multiple submitters, no           | VCV001044140 | 11               | 2768889        | 1044140     | 1030181     | rs1846543163 | Neutral    | 0.339    | 0.588        | 0.073    |

| gene  | pos | aa1 | aa2 | Name                                       | Condition(s)                                                                                                                                                                                                                                   | Clinical significance (Last reviewed)                                     | Review status                                        | Accession    | GRCh38Chromosome | GRCh38Location | VariationID | AlleleID(s) | dbSNP ID     | prediction | prob.LOF | prob.Neutral | prob.GOF |  |
|-------|-----|-----|-----|--------------------------------------------|------------------------------------------------------------------------------------------------------------------------------------------------------------------------------------------------------------------------------------------------|---------------------------------------------------------------------------|------------------------------------------------------|--------------|------------------|----------------|-------------|-------------|--------------|------------|----------|--------------|----------|--|
|       |     |     |     |                                            |                                                                                                                                                                                                                                                |                                                                           | conflicts                                            |              |                  |                |             |             |              |            |          |              |          |  |
| KCNQ1 | 393 | M   | T   | NM_000218.3(KCNQ1):c.1559T>C (p.Met520Thr) | Long QT syndrome                                                                                                                                                                                                                               | Uncertain significance(Last reviewed: Mar 14, 2020)                       | criteria provided, single submitter                  | VCV001018501 | 11               | 2768888        | 1018501     | 1009624     | rs199473479  | Neutral    | 0.309    | 0.614        | 0.077    |  |
| KCNQ1 | 397 | R   | W   | NM_000218.3(KCNQ1):c.1189C>T (p.Arg397Trp) | Long QT syndrome 1 Congenital long QT syndrome not specified Long QT syndrome not provided Arrhythmic Familial atrial fibrillation Jervell and Lange-Nielsen syndrome Cardiovascular phenotype Wolff-Parkinson-White pattern short QT syndrome | Conflicting interpretations of pathogenicity(Last reviewed: Apr 29, 2021) | criteria provided, conflicting interpretations       | VCV000052970 | 11               | 2587630        | 52970       | 67638       | rs199472776  | Neutral    | 0.344    | 0.555        | 0.101    |  |
| KCNQ1 | 398 | K   | R   | NM_000218.3(KCNQ1):c.1193A>G (p.Lys398Arg) | Arrhythmia not provided Congenital long QT syndrome Long QT syndrome                                                                                                                                                                           | Uncertain significance(Last reviewed: Mar 9, 2021)                        | criteria provided, multiple submitters, no conflicts | VCV000067021 | 11               | 2587634        | 67021       | 77917       | rs199472777  | Neutral    | 0.587    | 0.298        | 0.115    |  |
| KCNQ1 | 399 | K   | N   | NM_000218.3(KCNQ1):c.1578G>T (p.Lys526Asn) | Cardiovascular phenotype                                                                                                                                                                                                                       | Uncertain significance(Last reviewed: Oct 25, 2016)                       | criteria provided, single submitter                  | VCV000519343 | 11               | 2768907        | 519343      | 510281      | rs1554919483 | Neutral    | 0.475    | 0.394        | 0.131    |  |
| KCNQ1 | 401 | K   | R   | NM_000218.3(KCNQ1):c.1583A>G (p.Lys528Arg) | Arrhythmia                                                                                                                                                                                                                                     | Uncertain significance(Last reviewed: Aug 20, 2019)                       | criteria provided, single submitter                  | VCV000922455 | 11               | 2768912        | 922455      | 911636      | rs1846543781 | Neutral    | 0.52     | 0.304        | 0.175    |  |
| KCNQ1 | 403 | Q   | P   | NM_000218.3(KCNQ1):c.1589A>C (p.Gln530Pro) | not provided                                                                                                                                                                                                                                   | Uncertain significance(Last reviewed: Apr 23, 2021)                       | criteria provided, single submitter                  | VCV000392431 | 11               | 2768918        | 392431      | 372149      | rs1057524487 | Neutral    | 0.358    | 0.482        | 0.16     |  |
| KCNQ1 | 405 | A   | V   | NM_000218.3(KCNQ1):c.1595C>T (p.Ala532Val) | Long QT syndrome                                                                                                                                                                                                                               | Uncertain significance(Last reviewed: Mar 28, 2019)                       | criteria provided, single submitter                  | VCV000841742 | 11               | 2775964        | 841742      | 838248      | rs867549263  | Neutral    | 0.345    | 0.52         | 0.135    |  |
| KCNQ1 | 406 | R   | Q   | NM_000218.3(KCNQ1):c.1598G>A (p.Arg533Gln) | not provided Arrhythmia                                                                                                                                                                                                                        | Uncertain significance(Last reviewed: Dec 13, 2019)                       | criteria provided, multiple submitters, no conflicts | VCV000444243 | 11               | 2775967        | 444243      | 437883      | rs574321120  | Neutral    | 0.478    | 0.361        | 0.16     |  |
| KCNQ1 | 408 | P   | A   | NM_000218.3(KCNQ1):c.1222C>G (p.Pro408Ala) | Long QT syndrome not specified Arrhythmia not provided Atrial fibrillation, familial, 3 Jervell and Lange-Nielsen syndrome 1 Cardiovascular phenotype Short QT syndrome 2 Long QT syndrome 1                                                   | Benign/Likely benign(Last reviewed: Dec 4, 2020)                          | criteria provided, multiple submitters, no conflicts | VCV000042484 | 11               | 2587663        | 42484       | 51654       | rs28730756   | Neutral    | 0.48     | 0.308        | 0.212    |  |
| KCNQ1 | 413 | K   | R   | NM_000218.3(KCNQ1):c.1238A>G (p.Lys413Arg) | Arrhythmia                                                                                                                                                                                                                                     | Uncertain significance(Last reviewed: Nov 12, 2020)                       | criteria provided, single submitter                  | VCV000919123 | 11               | 2587679        | 919123      | 911600      | rs1351149628 | Neutral    | 0.532    | 0.282        | 0.186    |  |
| KCNQ1 | 417 | Q   | L   | NM_000218.3(KCNQ1):c.1631A>T (p.Gln544Leu) | not provided                                                                                                                                                                                                                                   | Uncertain significance(Last reviewed: Jul 23, 2018)                       | criteria provided, single submitter                  | VCV000200906 | 11               | 2776000        | 200906      | 197492      | rs794728574  | Neutral    | 0.318    | 0.558        | 0.125    |  |
| KCNQ1 | 417 | V   | M   | NM_000218.3(KCNQ1):c.1249G>A (p.Val417Met) | Arrhythmia                                                                                                                                                                                                                                     | Likely benign(Last reviewed: May 24, 2019)                                | criteria provided, single submitter                  | VCV000446189 | 11               | 2587690        | 446189      | 38428       | rs267607197  | Neutral    | 0.478    | 0.405        | 0.117    |  |
| KCNQ1 | 422 | K   | E   | NM_000218.3(KCNQ1):c.1264A>G (p.Lys422Glu) | Long QT syndrome 1                                                                                                                                                                                                                             | Uncertain significance(Last reviewed: Feb 3, 2020)                        | criteria provided, single submitter                  | VCV000812542 | 11               | 2588725        | 812542      | 800784      | rs1589969375 | Neutral    | 0.524    | 0.318        | 0.159    |  |
| KCNQ1 | 422 | K   | T   | NM_000218.3(KCNQ1):c.1265A>C (p.Lys422Thr) | Congenital long QT syndrome                                                                                                                                                                                                                    | not provided                                                              | no assertion provided                                | VCV000067022 | 11               | 2588726        | 67022       | 77918       | rs199472778  | Neutral    | 0.384    | 0.467        | 0.15     |  |
| KCNQ1 | 425 | L   | I   | NM_000218.3(KCNQ1):c.1654C>A (p.Leu552Ile) | Arrhythmia                                                                                                                                                                                                                                     | Uncertain significance(Last reviewed: Apr 29, 2021)                       | criteria provided, single submitter                  | VCV001331959 | 11               | 2776023        | 1331959     | 1322679     | NA           | Neutral    | 0.519    | 0.344        | 0.137    |  |

| gene  | pos | aa1 | aa2 | Name                                       | Condition(s)                                                                                                                                                                                    | Clinical significance (Last reviewed)                                     | Review status                                        | Accession    | GRCh38Chromosome | GRCh38Location | VariationID | AlleleID(s) | dbSNP ID     | prediction | prob.LOF | prob.Neutral | prob.GOF |
|-------|-----|-----|-----|--------------------------------------------|-------------------------------------------------------------------------------------------------------------------------------------------------------------------------------------------------|---------------------------------------------------------------------------|------------------------------------------------------|--------------|------------------|----------------|-------------|-------------|--------------|------------|----------|--------------|----------|
|       |     |     |     |                                            |                                                                                                                                                                                                 | reviewed: Apr 13, 2021)                                                   | submitter                                            |              |                  |                |             |             |              |            |          |              |          |
| KCNQ1 | 427 | V   | M   | NM_000218.3(KCNQ1):c.1660G>A (p.Val554Met) | not provided                                                                                                                                                                                    | Pathogenic(Last reviewed: Apr 16, 2013)                                   | criteria provided, single submitter                  | VCV000200853 | 11               | 2776029        | 200853      | 197493      | rs794728533  | Neutral    | 0.457    | 0.411        | 0.133    |
| KCNQ1 | 428 | D   | G   | NM_000218.3(KCNQ1):c.1283A>G (p.Asp428Gly) | not provided                                                                                                                                                                                    | not provided                                                              | no assertion provided                                | VCV000067023 | 11               | 2588744        | 67023       | 77919       | rs199472779  | Neutral    | 0.517    | 0.304        | 0.179    |
| KCNQ1 | 428 | R   | L   | NM_000218.3(KCNQ1):c.1664G>T (p.Arg555Leu) | Long QT syndrome                                                                                                                                                                                | Uncertain significance(Last reviewed: Sep 24, 2019)                       | criteria provided, single submitter                  | VCV000940744 | 11               | 2776033        | 940744      | 935472      | rs199472800  | Neutral    | 0.33     | 0.539        | 0.132    |
| KCNQ1 | 434 | R   | K   | NM_000218.3(KCNQ1):c.1682G>A (p.Arg561Lys) | not provided                                                                                                                                                                                    | Likely pathogenic(Last reviewed: Nov 19, 2013)                            | criteria provided, single submitter                  | VCV000200854 | 11               | 2776051        | 200854      | 197495      | rs794728534  | Neutral    | 0.522    | 0.293        | 0.185    |
| KCNQ1 | 435 | E   | K   | NM_000218.3(KCNQ1):c.1303G>A (p.Glu435Lys) | Arrhythmia                                                                                                                                                                                      | Uncertain significance(Last reviewed: Sep 27, 2019)                       | criteria provided, single submitter                  | VCV000923088 | 11               | 2588764        | 923088      | 911608      | rs1848630440 | Neutral    | 0.529    | 0.241        | 0.23     |
| KCNQ1 | 435 | R   | S   | NM_000218.3(KCNQ1):c.1686G>T (p.Arg562Ser) | not provided                                                                                                                                                                                    | Pathogenic(Last reviewed: Dec 3, 2012)                                    | criteria provided, single submitter                  | VCV000200855 | 11               | 2776986        | 200855      | 197497      | rs794728535  | Neutral    | 0.451    | 0.385        | 0.165    |
| KCNQ1 | 437 | D   | G   | NM_000218.3(KCNQ1):c.1691A>G (p.Asp564Gly) | Long QT syndrome 1                                                                                                                                                                              | Likely pathogenic(Last reviewed: Feb 18, 2017)                            | no assertion criteria provided                       | VCV000403694 | 11               | 2776991        | 403694      | 390668      | rs1554920808 | Neutral    | 0.534    | 0.282        | 0.184    |
| KCNQ1 | 440 | I   | F   | NM_000218.3(KCNQ1):c.1699A>T (p.Ile567Phe) | not provided                                                                                                                                                                                    | Likely pathogenic(Last reviewed: Oct 1, 2020)                             | criteria provided, single submitter                  | VCV001012792 | 11               | 2776999        | 1012792     | 1000727     | rs1846717292 | Neutral    | 0.523    | 0.349        | 0.128    |
| KCNQ1 | 441 | P   | S   | NM_000218.3(KCNQ1):c.1321C>T (p.Pro441Ser) | not specified Long QT syndrome not provided                                                                                                                                                     | Uncertain significance(Last reviewed: Jul 2, 2018)                        | criteria provided, multiple submitters, no conflicts | VCV000067024 | 11               | 2588782        | 67024       | 77920       | rs199473475  | Neutral    | 0.547    | 0.278        | 0.175    |
| KCNQ1 | 442 | H   | D   | NM_000218.3(KCNQ1):c.1324C>G (p.His442Asp) | Long QT syndrome                                                                                                                                                                                | Uncertain significance(Last reviewed: Aug 31, 2019)                       | criteria provided, single submitter                  | VCV000963906 | 11               | 2588785        | 963906      | 947395      | rs72549409   | Neutral    | 0.552    | 0.272        | 0.176    |
| KCNQ1 | 443 | P   | L   | NM_000218.3(KCNQ1):c.1709C>T (p.Pro570Leu) | Long QT syndrome 1                                                                                                                                                                              | Uncertain significance(Last reviewed: Nov 30, 2018)                       | criteria provided, single submitter                  | VCV000637976 | 11               | 2777009        | 637976      | 625809      | rs1590082242 | Neutral    | 0.456    | 0.396        | 0.148    |
| KCNQ1 | 446 | D   | E   | NM_000218.3(KCNQ1):c.1338C>G (p.Asp446Glu) | Long QT syndrome Congenital long QT syndrome Arrhythmia                                                                                                                                         | Conflicting interpretations of pathogenicity(Last reviewed: Aug 26, 2020) | criteria provided, conflicting interpretations       | VCV000067025 | 11               | 2588799        | 67025       | 77921       | rs199472780  | Neutral    | 0.594    | 0.231        | 0.176    |
| KCNQ1 | 448 | P   | L   | NM_000218.3(KCNQ1):c.1343C>T (p.Pro448Leu) | Long QT syndrome not specified Short QT syndrome 2 Jervell and Lange-Nielsen syndrome 1 Atrial fibrillation, familial, 3 not provided Long QT syndrome 1 Congenital long QT syndrome Arrhythmia | Conflicting interpretations of pathogenicity(Last reviewed: Mar 4, 2020)  | criteria provided, conflicting interpretations       | VCV000067027 | 11               | 2588804        | 67027       | 77923       | rs12720449   | Neutral    | 0.389    | 0.406        | 0.205    |
| KCNQ1 | 448 | P   | R   | NM_000218.3(KCNQ1):c.1343C>G (p.Pro448Arg) | Cardiovascular phenotype Short QT syndrome 2 Atrial fibrillation, familial, 3 Jervell and Lange-Nielsen syndrome 1 not specified not provided Long QT syndrome Arrhythmia Long QT syndrome 1    | Benign/Likely benign(Last reviewed: Dec 8, 2020)                          | criteria provided, multiple submitters, no conflicts | VCV000067026 | 11               | 2588804        | 67026       | 77922       | rs12720449   | GOF        | 0.489    | 0.17         | 0.341    |
| KCNQ1 | 449 | E   | K   | NM_000218.3(KCNQ1):c.1345G>A (p.Glu449Lys) | Arrhythmia Long QT syndrome                                                                                                                                                                     | Uncertain significance(Last reviewed: May 20,                             | criteria provided, multiple                          | VCV000924512 | 11               | 2588806        | 924512      | 911613      | rs372583676  | Neutral    | 0.527    | 0.266        | 0.207    |

| gene  | pos | aa1 | aa2 | Name                                       | Condition(s)                                                                                                                                                                                                                                                                                                                             | Clinical significance (Last reviewed)                                      | Review status                                        | Accession    | GRCh38Chromosome | GRCh38Location | VariationID | AlleleID(s) | dbSNP ID     | prediction | prob.LOF | prob.Neutral | prob.GOF |  |
|-------|-----|-----|-----|--------------------------------------------|------------------------------------------------------------------------------------------------------------------------------------------------------------------------------------------------------------------------------------------------------------------------------------------------------------------------------------------|----------------------------------------------------------------------------|------------------------------------------------------|--------------|------------------|----------------|-------------|-------------|--------------|------------|----------|--------------|----------|--|
|       |     |     |     |                                            |                                                                                                                                                                                                                                                                                                                                          | 2020)                                                                      | submitters, no conflicts                             |              |                  |                |             |             |              |            |          |              |          |  |
| KCNQ1 | 449 | V   | I   | NM_000218.3(KCNQ1):c.1726G>A (p.Val576Ile) | Arrhythmia not provided Long QT syndrome  Long QT syndrome 1 not specified                                                                                                                                                                                                                                                               | Conflicting interpretations of pathogenicity (Last reviewed: Jan 23, 2020) | criteria provided, conflicting interpretations       | VCV000200813 | 11               | 2777026        | 200813      | 197500      | rs750409379  | Neutral    | 0.431    | 0.447        | 0.122    |  |
| KCNQ1 | 451 | E   | K   | NM_000218.3(KCNQ1):c.1732G>A (p.Glu578Lys) | not specified                                                                                                                                                                                                                                                                                                                            | Uncertain significance (Last reviewed: Mar 18, 2016)                       | criteria provided, single submitter                  | VCV000372394 | 11               | 2777032        | 372394      | 359875      | rs1057517750 | Neutral    | 0.508    | 0.297        | 0.195    |  |
| KCNQ1 | 451 | R   | Q   | NM_000218.3(KCNQ1):c.1352G>A (p.Arg451Gln) | Long QT syndrome Atrial fibrillation, familial, 3  Short QT syndrome 2 Jervell and Lange-Nielsen syndrome 1 Long QT syndrome 1 not provided  Arrhythmia                                                                                                                                                                                  | Conflicting interpretations of pathogenicity (Last reviewed: Apr 6, 2021)  | criteria provided, conflicting interpretations       | VCV000067029 | 11               | 2588813        | 67029       | 77925       | rs199472781  | Neutral    | 0.438    | 0.423        | 0.139    |  |
| KCNQ1 | 451 | R   | W   | NM_000218.3(KCNQ1):c.1351C>T (p.Arg451Trp) | Long QT syndrome Arrhythmia Congenital long QT syndrome not provided                                                                                                                                                                                                                                                                     | Uncertain significance (Last reviewed: Oct 6, 2020)                        | criteria provided, multiple submitters, no conflicts | VCV000067028 | 11               | 2588812        | 67028       | 77924       | rs199472782  | Neutral    | 0.272    | 0.618        | 0.11     |  |
| KCNQ1 | 452 | R   | Q   | NM_000218.3(KCNQ1):c.1355G>A (p.Arg452Gln) | Long QT syndrome Arrhythmia short QT syndrome Cardiovascular phenotype not provided not specified Jervell and Lange-Nielsen syndrome Familial atrial fibrillation  Congenital long QT syndrome Atrial fibrillation, familial, 3 Beckwith-Wiedemann syndrome  Jervell and Lange-Nielsen syndrome 1 Long QT syndrome 1 Short QT syndrome 2 | Uncertain significance (Last reviewed: Apr 6, 2021)                        | criteria provided, multiple submitters, no conflicts | VCV000067030 | 11               | 2588816        | 67030       | 77926       | rs145229963  | Neutral    | 0.472    | 0.391        | 0.137    |  |
| KCNQ1 | 452 | R   | W   | NM_000218.3(KCNQ1):c.1354C>T (p.Arg452Trp) | Long QT syndrome Long QT syndrome 1 not provided Congenital long QT syndrome  Arrhythmia Cardiovascular phenotype Atrial fibrillation, familial, 3 Long QT syndrome 1 Short QT syndrome 2 Beckwith-Wiedemann syndrome Jervell and Lange-Nielsen syndrome 1                                                                               | Conflicting interpretations of pathogenicity (Last reviewed: Jun 2, 2021)  | criteria provided, conflicting interpretations       | VCV000052980 | 11               | 2588815        | 52980       | 67648       | rs140452381  | Neutral    | 0.253    | 0.638        | 0.109    |  |
| KCNQ1 | 455 | H   | Y   | NM_000218.3(KCNQ1):c.1363C>T (p.His455Tyr) | Congenital long QT syndrome                                                                                                                                                                                                                                                                                                              | not provided                                                               | no assertion provided                                | VCV000052981 | 11               | 2588824        | 52981       | 67649       | rs199473476  | Neutral    | 0.352    | 0.527        | 0.121    |  |
| KCNQ1 | 460 | G   | S   | NM_000218.3(KCNQ1):c.1378G>A (p.Gly460Ser) | Long QT syndrome not provided SUDDEN INFANT DEATH SYNDROME Arrhythmia                                                                                                                                                                                                                                                                    | Uncertain significance (Last reviewed: Dec 11, 2020)                       | criteria provided, multiple submitters, no conflicts | VCV000067031 | 11               | 2588839        | 67031       | 77927       | rs199472783  | GOF        | 0.571    | 0.138        | 0.291    |  |
| KCNQ1 | 461 | I   | F   | NM_000218.3(KCNQ1):c.1762A>T (p.Ile588Phe) | not provided Long QT syndrome 1                                                                                                                                                                                                                                                                                                          | Pathogenic/Likely pathogenic (Last reviewed: May 17, 2020)                 | criteria provided, multiple submitters, no conflicts | VCV000200856 | 11               | 2778005        | 200856      | 197501      | rs794728536  | Neutral    | 0.462    | 0.404        | 0.134    |  |
| KCNQ1 | 461 | I   | T   | NM_000218.3(KCNQ1):c.1763T>C (p.Ile588Thr) | not provided                                                                                                                                                                                                                                                                                                                             | Likely pathogenic (Last reviewed: Aug 25, 2011)                            | criteria provided, single submitter                  | VCV000200908 | 11               | 2778006        | 200908      | 197502      | rs794728576  | Neutral    | 0.518    | 0.309        | 0.173    |  |
| KCNQ1 | 461 | I   | V   | NM_000218.3(KCNQ1):c.1762A>G (p.Ile588Val) | Arrhythmia                                                                                                                                                                                                                                                                                                                               | Uncertain significance (Last reviewed: Sep 13, 2019)                       | criteria provided, single submitter                  | VCV000918864 | 11               | 2778005        | 918864      | 911641      | rs794728536  | Neutral    | 0.523    | 0.338        | 0.139    |  |
| KCNQ1 | 462 | D   | N   | NM_000218.3(KCNQ1):c.1384G>A (p.Asp462Asn) | Long QT syndrome                                                                                                                                                                                                                                                                                                                         | Uncertain significance (Last reviewed: Aug 14, 2020)                       | criteria provided, single submitter                  | VCV000940662 | 11               | 2588845        | 940662      | 935471      | rs776205380  | Neutral    | 0.551    | 0.266        | 0.183    |  |
| KCNQ1 | 462 | G   | S   | NM_000218.3(KCNQ1):c.1765G>A (p.Gly589Ser) | Arrhythmia Long QT syndrome                                                                                                                                                                                                                                                                                                              | Uncertain significance (Last reviewed: Aug 14, 2020)                       | criteria provided,                                   | VCV000923600 | 11               | 2778008        | 923600      | 911643      | rs780676796  | Neutral    | 0.552    | 0.249        | 0.199    |  |



| gene  | pos | aa1 | aa2 | Name                                       | Condition(s)                                                                                                                                                                                                           | Clinical significance (Last reviewed)                                    | Review status                                        | Accession    | GRCh38Chromosome | GRCh38Location | VariationID | AlleleID(s) | dbSNP ID     | prediction | prob.LOF | prob.Neutral | prob.GOF |
|-------|-----|-----|-----|--------------------------------------------|------------------------------------------------------------------------------------------------------------------------------------------------------------------------------------------------------------------------|--------------------------------------------------------------------------|------------------------------------------------------|--------------|------------------|----------------|-------------|-------------|--------------|------------|----------|--------------|----------|
|       |     |     |     |                                            |                                                                                                                                                                                                                        | reviewed: Oct 8, 2020)                                                   | multiple submitters, no conflicts                    |              |                  |                |             |             |              |            |          |              |          |
| KCNQ1 | 463 | A   | P   | NM_000218.3(KCNQ1):c.1768G>C (p.Ala590Pro) | Cardiovascular phenotype                                                                                                                                                                                               | Uncertain significance(Last reviewed: Jul 6, 2016)                       | criteria provided, single submitter                  | VCV000519284 | 11               | 2778011        | 519284      | 510282      | rs199472813  | Neutral    | 0.522    | 0.308        | 0.17     |
| KCNQ1 | 463 | S   | G   | NM_000218.3(KCNQ1):c.1387A>G (p.Ser463Gly) | Arrhythmia                                                                                                                                                                                                             | Uncertain significance(Last reviewed: Jul 25, 2019)                      | criteria provided, single submitter                  | VCV000923366 | 11               | 2588848        | 923366      | 911616      | rs1848632977 | Neutral    | 0.504    | 0.34         | 0.155    |
| KCNQ1 | 464 | R   | L   | NM_000218.3(KCNQ1):c.1772G>T (p.Arg591Leu) | not provided                                                                                                                                                                                                           | Pathogenic(Last reviewed: Nov 4, 2013)                                   | criteria provided, single submitter                  | VCV000200857 | 11               | 2778015        | 200857      | 197503      | rs199472814  | Neutral    | 0.315    | 0.565        | 0.119    |
| KCNQ1 | 464 | R   | P   | NM_000218.3(KCNQ1):c.1772G>C (p.Arg591Pro) | Long QT syndrome                                                                                                                                                                                                       | Uncertain significance(Last reviewed: Oct 17, 2019)                      | criteria provided, single submitter                  | VCV000854899 | 11               | 2778015        | 854899      | 838249      | rs199472814  | Neutral    | 0.464    | 0.39         | 0.146    |
| KCNQ1 | 466 | N   | K   | NM_000218.3(KCNQ1):c.1779C>G (p.Asn593Lys) | Long QT syndrome                                                                                                                                                                                                       | Uncertain significance(Last reviewed: Oct 27, 2020)                      | criteria provided, single submitter                  | VCV001044816 | 11               | 2778022        | 1044816     | 1030183     | rs1421636319 | Neutral    | 0.513    | 0.273        | 0.214    |
| KCNQ1 | 469 | E   | G   | NM_000218.3(KCNQ1):c.1787A>G (p.Glu596Gly) | not provided                                                                                                                                                                                                           | Pathogenic(Last reviewed: Apr 12, 2014)                                  | criteria provided, single submitter                  | VCV000200859 | 11               | 2778030        | 200859      | 197505      | rs794728538  | Neutral    | 0.509    | 0.314        | 0.177    |
| KCNQ1 | 511 | R   | W   | NM_000218.3(KCNQ1):c.1531C>T (p.Arg511Trp) | Long QT syndrome Congenital long QT syndrome not provided                                                                                                                                                              | Uncertain significance(Last reviewed: Oct 22, 2020)                      | criteria provided, multiple submitters, no conflicts | VCV000067034 | 11               | 2768860        | 67034       | 77930       | rs199472785  | Neutral    | 0.707    | 0.207        | 0.086    |
| KCNQ1 | 514 | I   | T   | NM_000218.3(KCNQ1):c.1541T>C (p.Ile514Thr) | Congenital long QT syndrome Long QT syndrome 1                                                                                                                                                                         | Uncertain significance(Last reviewed: Nov 16, 2018)                      | criteria provided, single submitter                  | VCV000052990 | 11               | 2768870        | 52990       | 67658       | rs199472786  | LOF        | 0.91     | 0.03         | 0.06     |
| KCNQ1 | 517 | I   | T   | NM_000218.3(KCNQ1):c.1550T>C (p.Ile517Thr) | Congenital long QT syndrome                                                                                                                                                                                            | not provided                                                             | no assertion provided                                | VCV000067035 | 11               | 2768879        | 67035       | 77931       | rs199473478  | LOF        | 0.908    | 0.03         | 0.061    |
| KCNQ1 | 518 | R   | G   | NM_000218.3(KCNQ1):c.1552C>G (p.Arg518Gly) | Long QT syndrome 1 Long QT syndrome  Congenital long QT syndrome                                                                                                                                                       | Likely pathogenic(Last reviewed: May 15, 2019)                           | criteria provided, multiple submitters, no conflicts | VCV000052991 | 11               | 2768881        | 52991       | 67659       | rs17215500   | LOF        | 0.901    | 0.045        | 0.054    |
| KCNQ1 | 518 | R   | P   | NM_000218.3(KCNQ1):c.1553G>C (p.Arg518Pro) | Congenital long QT syndrome not provided                                                                                                                                                                               | Uncertain significance(Last reviewed: Apr 6, 2018)                       | criteria provided, single submitter                  | VCV000052992 | 11               | 2768882        | 52992       | 67660       | rs145974930  | LOF        | 0.873    | 0.065        | 0.062    |
| KCNQ1 | 518 | R   | Q   | NM_000218.3(KCNQ1):c.1553G>A (p.Arg518Gln) | Long QT syndrome not specified Congenital long QT syndrome not provided Arrhythmia                                                                                                                                     | Uncertain significance(Last reviewed: Jan 24, 2022)                      | criteria provided, multiple submitters, no conflicts | VCV000067036 | 11               | 2768882        | 67036       | 77932       | rs145974930  | LOF        | 0.881    | 0.061        | 0.059    |
| KCNQ1 | 519 | R   | C   | NM_000218.3(KCNQ1):c.1555C>T (p.Arg519Cys) | Congenital long QT syndrome Arrhythmic Cardiovascular phenotype not specified Atrial fibrillation, familial, 3 Beckwith-Wiedemann syndrome Jervell and Lange-Nielsen syndrome 1 Long QT syndrome 1 Short QT syndrome 2 | Uncertain significance(Last reviewed: Mar 24, 2020)                      | criteria provided, multiple submitters, no conflicts | VCV000067037 | 11               | 2768884        | 67037       | 77933       | rs199472787  | LOF        | 0.883    | 0.058        | 0.06     |
| KCNQ1 | 519 | R   | H   | NM_000218.3(KCNQ1):c.1556G>A (p.Arg519His) | Short QT syndrome 2 Atrial fibrillation, familial, 3 Jervell and Lange-Nielsen syndrome 1 Long QT syndrome not provided Arrhythmic Long QT syndrome 1                                                                  | Conflicting interpretations of pathogenicity(Last reviewed: Jun 4, 2020) | criteria provided, conflicting interpretations       | VCV000067038 | 11               | 2768885        | 67038       | 77934       | rs199472788  | LOF        | 0.863    | 0.075        | 0.062    |
| KCNQ1 | 520 | M   | R   | NM_000218.3(KCNQ1):c.1559T>G (p.Met520Arg) | Cardiovascular phenotype not provided  Congenital long QT syndrome Long QT                                                                                                                                             | Pathogenic Likely pathogenic(Last reviewed: Oct 8, 2020)                 | criteria provided,                                   | VCV000052993 | 11               | 2768888        | 52993       | 67661       | rs199473479  | LOF        | 0.902    | 0.02         | 0.077    |

| gene  | pos | aa1 | aa2 | Name                                       | Condition(s)                                                                                                                                                                                                          | Clinical significance (Last reviewed)                                     | Review status                                        | Accession     | GRCh38Chromosome | GRCh38Location | VariationID | AlleleID(s) | dbSNP ID    | prediction | prob.LOF | prob.Neutral | prob.GOF |  |
|-------|-----|-----|-----|--------------------------------------------|-----------------------------------------------------------------------------------------------------------------------------------------------------------------------------------------------------------------------|---------------------------------------------------------------------------|------------------------------------------------------|---------------|------------------|----------------|-------------|-------------|-------------|------------|----------|--------------|----------|--|
|       |     |     |     |                                            | syndrome                                                                                                                                                                                                              |                                                                           | multiple submitters, no conflicts                    |               |                  |                |             |             |             |            |          |              |          |  |
| KCNQ1 | 522 | Y   | S   | NM_000218.3(KCNQ1):c.1565A>C (p.Tyr522Ser) | Congenital long QT syndrome not provided                                                                                                                                                                              | Pathogenic(Last reviewed: Aug 14, 2012)                                   | criteria provided, single submitter                  | VCV000067039  | 11               | 2768894        | 67039       | 77935       | rs199472789 | LOF        | 0.9      | 0.047        | 0.054    |  |
| KCNQ1 | 524 | V   | G   | NM_000218.3(KCNQ1):c.1571T>G (p.Val524Gly) | Congenital long QT syndrome not provided Long QT syndrome                                                                                                                                                             | Pathogenic/Likely pathogenic(Last reviewed: Nov 25, 2020)                 | criteria provided, multiple submitters, no conflicts | VCV000052994  | 11               | 2768900        | 52994       | 67662       | rs199472790 | LOF        | 0.884    | 0.056        | 0.06     |  |
| KCNQ1 | 525 | A   | T   | NM_000218.3(KCNQ1):c.1573G>A (p.Ala525Thr) | not provided Long QT syndrome 1, recessive  Cardiovascular phenotype Congenital long QT syndrome                                                                                                                      | Pathogenic/Likely pathogenic(Last reviewed: Jun 1, 2016)                  | criteria provided, multiple submitters, no conflicts | VCV000003132  | 11               | 2768902        | 3132        | 18171       | rs120074188 | LOF        | 0.891    | 0.051        | 0.058    |  |
| KCNQ1 | 525 | A   | V   | NM_000218.3(KCNQ1):c.1574C>T (p.Ala525Val) | Congenital long QT syndrome                                                                                                                                                                                           | not provided                                                              | no assertion provided                                | VCV000067040  | 11               | 2768903        | 67040       | 77936       | rs199472791 | LOF        | 0.863    | 0.073        | 0.064    |  |
| KCNQ1 | 526 | K   | E   | NM_000218.3(KCNQ1):c.1576A>G (p.Lys526Glu) | Long QT syndrome Congenital long QT syndrome not provided                                                                                                                                                             | Uncertain significance(Last reviewed: Oct 7, 2018)                        | criteria provided, multiple submitters, no conflicts | VCV000052995  | 11               | 2768905        | 52995       | 67663       | rs199472792 | LOF        | 0.807    | 0.122        | 0.071    |  |
| KCNQ1 | 526 | K   | Q   | NM_000218.3(KCNQ1):c.1576A>C (p.Lys526Gln) | Long QT syndrome Long QT syndrome 1                                                                                                                                                                                   | Uncertain significance(Last reviewed: Jan 30, 2020)                       | criteria provided, multiple submitters, no conflicts | VCV0000853542 | 11               | 2768905        | 853542      | 838247      | rs199472792 | Neutral    | 0.725    | 0.198        | 0.077    |  |
| KCNQ1 | 533 | R   | W   | NM_000218.3(KCNQ1):c.1597C>T (p.Arg533Trp) | Arrhythmic Long QT syndrome Congenital long QT syndrome Long QT syndrome 1                                                                                                                                            | Conflicting interpretations of pathogenicity(Last reviewed: Jan 24, 2020) | criteria provided, conflicting interpretations       | VCV000067041  | 11               | 2775966        | 67041       | 77937       | rs199472793 | Neutral    | 0.493    | 0.408        | 0.099    |  |
| KCNQ1 | 539 | R   | Q   | NM_000218.3(KCNQ1):c.1616G>A (p.Arg539Gln) | Long QT syndrome Cardiovascular phenotype  not provided Arrhythmic Long QT syndrome 1  Congenital long QT syndrome                                                                                                    | Conflicting interpretations of pathogenicity(Last reviewed: May 26, 2021) | criteria provided, conflicting interpretations       | VCV000067042  | 11               | 2775985        | 67042       | 77938       | rs199472794 | LOF        | 0.811    | 0.129        | 0.06     |  |
| KCNQ1 | 539 | R   | W   | NM_000218.3(KCNQ1):c.1615C>T (p.Arg539Trp) | Long QT syndrome 1 Atrial fibrillation, familial, 3 Beckwith-Wiedemann syndrome Long QT syndrome 1 Jervell and Lange-Nielsen syndrome 1 Short QT syndrome 2 Long QT syndrome not provided Congenital long QT syndrome | Pathogenic(Last reviewed: Mar 18, 2020)                                   | criteria provided, multiple submitters, no conflicts | VCV000052998  | 11               | 2775984        | 52998       | 67666       | rs199472795 | Neutral    | 0.671    | 0.245        | 0.085    |  |
| KCNQ1 | 541 | V   | I   | NM_000218.3(KCNQ1):c.1621G>A (p.Val541Ile) | Long QT syndrome not specified Congenital long QT syndrome Wolff-Parkinson-White pattern not provided Arrhythmic Long QT syndrome 1                                                                                   | Conflicting interpretations of pathogenicity(Last reviewed: Nov 25, 2020) | criteria provided, conflicting interpretations       | VCV000067043  | 11               | 2775990        | 67043       | 77939       | rs199472796 | LOF        | 0.851    | 0.082        | 0.067    |  |
| KCNQ1 | 543 | E   | K   | NM_000218.3(KCNQ1):c.1627G>A (p.Glu543Lys) | Congenital long QT syndrome                                                                                                                                                                                           | not provided                                                              | no assertion provided                                | VCV000067044  | 11               | 2775996        | 67044       | 77940       | rs199472797 | LOF        | 0.845    | 0.096        | 0.059    |  |
| KCNQ1 | 546 | S   | L   | NM_000218.3(KCNQ1):c.1637C>T (p.Ser546Leu) | Long QT syndrome 1 Long QT syndrome not provided Congenital long QT syndrome  Arrhythmic Cardiovascular phenotype                                                                                                     | Pathogenic/Likely pathogenic(Last reviewed: Jan 3, 2022)                  | criteria provided, multiple submitters, no conflicts | VCV000053000  | 11               | 2776006        | 53000       | 67668       | rs199473480 | Neutral    | 0.712    | 0.187        | 0.101    |  |
| KCNQ1 | 547 | Q   | R   | NM_000218.3(KCNQ1):c.1640A>G (p.Gln547Arg) | Congenital long QT syndrome Arrhythmia                                                                                                                                                                                | Uncertain significance(Last reviewed: Apr 13, 2020)                       | criteria provided, single submitter                  | VCV000067045  | 11               | 2776009        | 67045       | 77941       | rs199472798 | LOF        | 0.856    | 0.083        | 0.061    |  |
| KCNQ1 | 548 | G   | D   | NM_000218.3(KCNQ1):c.1643G>A (p.Gly548Asp) | Congenital long QT syndrome Long QT syndrome                                                                                                                                                                          | Uncertain significance(Last reviewed: Apr 13, 2020)                       | criteria provided, single submitter                  | VCV000053001  | 11               | 2776012        | 53001       | 67669       | rs199472799 | LOF        | 0.913    | 0.036        | 0.051    |  |

| gene  | pos | aa1 | aa2 | Name                                       | Condition(s)                                                                                                                           | Clinical significance (Last reviewed)                                     | Review status                                        | Accession    | GRCh38Chromosome | GRCh38Location | VariationID | AlleleID(s) | dbSNP ID     | prediction | prob.LOF | prob.Neutral | prob.GOF |
|-------|-----|-----|-----|--------------------------------------------|----------------------------------------------------------------------------------------------------------------------------------------|---------------------------------------------------------------------------|------------------------------------------------------|--------------|------------------|----------------|-------------|-------------|--------------|------------|----------|--------------|----------|
|       |     |     |     |                                            |                                                                                                                                        | reviewed: Oct 20, 2020)                                                   | submitter                                            |              |                  |                |             |             |              |            |          |              |          |
| KCNQ1 | 554 | V   | A   | NM_000218.3(KCNQ1):c.1661T>C (p.Val554Ile) | Congenital long QT syndrome                                                                                                            | not provided                                                              | no assertion provided                                | VCV000053002 | 11               | 2776030        | 53002       | 67670       | rs199473481  | Neutral    | 0.733    | 0.194        | 0.073    |
| KCNQ1 | 554 | V   | L   | NM_000218.3(KCNQ1):c.1660G>T (p.Val554Leu) | Arrhythmia                                                                                                                             | Uncertain significance(Last reviewed: Dec 10, 2020)                       | criteria provided, single submitter                  | VCV000923332 | 11               | 2776029        | 923332      | 911638      | rs794728533  | Neutral    | 0.709    | 0.214        | 0.077    |
| KCNQ1 | 555 | R   | C   | NM_000218.3(KCNQ1):c.1663C>T (p.Arg555Cys) | Long QT syndrome Cardiovascular phenotype Prolonged QT interval not provided Long QT syndrome 1 Congenital long QT syndrome Arrhythmia | Pathogenic(Last reviewed: Mar 26, 2021)                                   | criteria provided, multiple submitters, no conflicts | VCV000003126 | 11               | 2776032        | 3126        | 18165       | rs120074185  | LOF        | 0.862    | 0.078        | 0.061    |
| KCNQ1 | 555 | R   | H   | NM_000218.3(KCNQ1):c.1664G>A (p.Arg555His) | Congenital long QT syndrome Cardiovascular phenotype Long QT syndrome not provided                                                     | Pathogenic/Likely pathogenic(Last reviewed: Jul 10, 2021)                 | criteria provided, multiple submitters, no conflicts | VCV000053003 | 11               | 2776033        | 53003       | 67671       | rs199472800  | LOF        | 0.795    | 0.137        | 0.068    |
| KCNQ1 | 555 | R   | S   | NM_000218.3(KCNQ1):c.1663C>A (p.Arg555Ser) | Congenital long QT syndrome Long QT syndrome not provided                                                                              | Conflicting interpretations of pathogenicity(Last reviewed: Mar 11, 2020) | criteria provided, conflicting interpretations       | VCV000067046 | 11               | 2776032        | 67046       | 77942       | rs120074185  | LOF        | 0.788    | 0.143        | 0.069    |
| KCNQ1 | 557 | K   | E   | NM_000218.3(KCNQ1):c.1669A>G (p.Lys557Glu) | Congenital long QT syndrome Cardiovascular phenotype Long QT syndrome not provided                                                     | Pathogenic/Likely pathogenic(Last reviewed: Oct 5, 2020)                  | criteria provided, multiple submitters, no conflicts | VCV000067047 | 11               | 2776038        | 67047       | 77943       | rs199472801  | LOF        | 0.867    | 0.079        | 0.055    |
| KCNQ1 | 562 | R   | M   | NM_000218.3(KCNQ1):c.1685G>T (p.Arg562Met) | Congenital long QT syndrome                                                                                                            | not provided                                                              | no assertion provided                                | VCV000067048 | 11               | 2776054        | 67048       | 77944       | rs199472802  | Neutral    | 0.758    | 0.176        | 0.067    |
| KCNQ1 | 565 | Q   | P   | NM_000218.3(KCNQ1):c.1694A>C (p.Gln565Pro) | Long QT syndrome                                                                                                                       | Uncertain significance(Last reviewed: Sep 24, 2019)                       | criteria provided, single submitter                  | VCV000940743 | 11               | 2776994        | 940743      | 935473      | rs1846716972 | Neutral    | 0.692    | 0.234        | 0.074    |
| KCNQ1 | 566 | S   | F   | NM_000218.3(KCNQ1):c.1697C>T (p.Ser566Phe) | Long QT syndrome 1 Congenital long QT syndrome Long QT syndrome not specified not provided                                             | Likely pathogenic(Last reviewed: Jan 18, 2021)                            | criteria provided, multiple submitters, no conflicts | VCV000053006 | 11               | 2776997        | 53006       | 67674       | rs199472804  | Neutral    | 0.539    | 0.373        | 0.088    |
| KCNQ1 | 566 | S   | P   | NM_000218.3(KCNQ1):c.1696T>C (p.Ser566Pro) | Congenital long QT syndrome                                                                                                            | not provided                                                              | no assertion provided                                | VCV000067049 | 11               | 2776996        | 67049       | 77945       | rs199472803  | Neutral    | 0.694    | 0.234        | 0.072    |
| KCNQ1 | 566 | S   | Y   | NM_000218.3(KCNQ1):c.1697C>A (p.Ser566Tyr) | not provided Congenital long QT syndrome Long QT syndrome                                                                              | Conflicting interpretations of pathogenicity(Last reviewed: Jul 10, 2020) | criteria provided, conflicting interpretations       | VCV000053005 | 11               | 2776997        | 53005       | 67673       | rs199472804  | Neutral    | 0.571    | 0.35         | 0.079    |
| KCNQ1 | 567 | I   | S   | NM_000218.3(KCNQ1):c.1700T>G (p.Ile567Ser) | Congenital long QT syndrome                                                                                                            | not provided                                                              | no assertion provided                                | VCV000053008 | 11               | 2777000        | 53008       | 67676       | rs199472805  | Neutral    | 0.722    | 0.182        | 0.095    |
| KCNQ1 | 567 | I   | T   | NM_000218.3(KCNQ1):c.1700T>C (p.Ile567Thr) | Long QT syndrome 1 Long QT syndrome Congenital long QT syndrome Arrhythmial not provided                                               | Pathogenic/Likely pathogenic(Last reviewed: Sep 28, 2021)                 | criteria provided, multiple submitters, no conflicts | VCV000053007 | 11               | 2777000        | 53007       | 67675       | rs199472805  | Neutral    | 0.652    | 0.257        | 0.091    |
| KCNQ1 | 568 | G   | A   | NM_000218.3(KCNQ1):c.1703G>C (p.Gly568Ala) | Long QT syndrome 1 Congenital long QT syndrome                                                                                         | Pathogenic(Last reviewed: Jan 1, 2012)                                    | no assertion criteria provided                       | VCV000053010 | 11               | 2777003        | 53010       | 67678       | rs199472806  | Neutral    | 0.713    | 0.188        | 0.099    |
| KCNQ1 | 568 | G   | R   | NM_000218.3(KCNQ1):c.1702G>A (p.Gly568Arg) | Congenital long QT syndrome Cardiovascular phenotype not provided not specified Long QT syndrome                                       | Pathogenic/Likely pathogenic(Last reviewed: Jun 13, 2021)                 | criteria provided, multiple submitters, no conflicts | VCV000053009 | 11               | 2777002        | 53009       | 67677       | rs199472807  | LOF        | 0.76     | 0.087        | 0.153    |

| gene  | pos | aa1 | aa2 | Name                                       | Condition(s)                                                                                                                                                                                                                                                                | Clinical significance (Last reviewed)                     | Review status                                        | Accession    | GRCh38Chromosome | GRCh38Location | VariationID | AlleleID(s) | dbSNP ID    | prediction | prob.LOF | prob.Neutral | prob.GOF |
|-------|-----|-----|-----|--------------------------------------------|-----------------------------------------------------------------------------------------------------------------------------------------------------------------------------------------------------------------------------------------------------------------------------|-----------------------------------------------------------|------------------------------------------------------|--------------|------------------|----------------|-------------|-------------|-------------|------------|----------|--------------|----------|
| KCNQ1 | 568 | G   | R   | NM_000218.3(KCNQ1):c.1702G>A (p.Gly568Arg) | Congenital long QT syndrome Cardiovascular phenotype not provided not specified Long QT syndrome                                                                                                                                                                            | Pathogenic Likely pathogenic(Last reviewed: Jun 13, 2021) | criteria provided, multiple submitters, no conflicts | VCV000053009 | 11               | 2777002        | 53009       | 67677       | rs199472807 | LOF        | 0.76     | 0.087        | 0.153    |
| KCNQ1 | 568 | G   | R   | NM_000218.3(KCNQ1):c.1702G>C (p.Gly568Arg) | Long QT syndrome                                                                                                                                                                                                                                                            | Likely pathogenic(Last reviewed: Mar 8, 2018)             | criteria provided, single submitter                  | VCV000570319 | 11               | 2777002        | 570319      | 565649      | rs199472807 | LOF        | 0.76     | 0.087        | 0.153    |
| KCNQ1 | 568 | G   | R   | NM_000218.3(KCNQ1):c.1702G>C (p.Gly568Arg) | Long QT syndrome                                                                                                                                                                                                                                                            | Likely pathogenic(Last reviewed: Mar 8, 2018)             | criteria provided, single submitter                  | VCV000570319 | 11               | 2777002        | 570319      | 565649      | rs199472807 | LOF        | 0.76     | 0.087        | 0.153    |
| KCNQ1 | 569 | K   | E   | NM_000218.3(KCNQ1):c.1705A>G (p.Lys569Glu) | Congenital long QT syndrome                                                                                                                                                                                                                                                 | not provided                                              | no assertion provided                                | VCV000067050 | 11               | 2777005        | 67050       | 77946       | rs199472808 | Neutral    | 0.695    | 0.213        | 0.092    |
| KCNQ1 | 571 | S   | L   | NM_000218.3(KCNQ1):c.1712C>T (p.Ser571Leu) | Congenital long QT syndrome Long QT syndrome                                                                                                                                                                                                                                | Uncertain significance(Last reviewed: Sep 3, 2020)        | criteria provided, single submitter                  | VCV000067052 | 11               | 2777012        | 67052       | 77948       | rs199472809 | Neutral    | 0.365    | 0.534        | 0.101    |
| KCNQ1 | 573 | F   | L   | NM_000218.3(KCNQ1):c.1719C>A (p.Phe573Leu) | Congenital long QT syndrome                                                                                                                                                                                                                                                 | not provided                                              | no assertion provided                                | VCV000053012 | 11               | 2777019        | 53012       | 67680       | rs199472810 | Neutral    | 0.554    | 0.337        | 0.109    |
| KCNQ1 | 574 | I   | V   | NM_000218.3(KCNQ1):c.1720A>G (p.Ile574Val) | Long QT syndrome Arrhythmia                                                                                                                                                                                                                                                 | Uncertain significance(Last reviewed: Oct 16, 2019)       | criteria provided, multiple submitters, no conflicts | VCV000630538 | 11               | 2777020        | 630538      | 617861      | rs761947465 | Neutral    | 0.573    | 0.322        | 0.105    |
| KCNQ1 | 583 | R   | C   | NM_000218.3(KCNQ1):c.1747C>T (p.Arg583Cys) | not provided Atrial fibrillation, familial, 3  Beckwith-Wiedemann syndrome Short QT syndrome 2 Jervell and Lange-Nielsen syndrome 1 Long QT syndrome 1 Acquired susceptibility to long QT syndrome 1 KCNQ1-Related Disorders Congenital long QT syndrome Long QT syndrome 1 | Likely pathogenic(Last reviewed: Nov 11, 2021)            | criteria provided, multiple submitters, no conflicts | VCV000003142 | 11               | 2777990        | 3142        | 18181       | rs17221854  | Neutral    | 0.454    | 0.433        | 0.113    |
| KCNQ1 | 583 | R   | H   | NM_000218.3(KCNQ1):c.1748G>A (p.Arg583His) | Long QT syndrome Arrhythmia Congenital long QT syndrome not provided                                                                                                                                                                                                        | Uncertain significance(Last reviewed: Oct 21, 2020)       | criteria provided, multiple submitters, no conflicts | VCV000067053 | 11               | 2777991        | 67053       | 77949       | rs199473482 | Neutral    | 0.474    | 0.403        | 0.123    |
| KCNQ1 | 584 | G   | S   | NM_000218.3(KCNQ1):c.1750G>A (p.Gly584Ser) | Long QT syndrome Arrhythmia SUDDEN INFANT DEATH SYNDROME                                                                                                                                                                                                                    | Uncertain significance(Last reviewed: Sep 1, 2020)        | criteria provided, multiple submitters, no conflicts | VCV000067054 | 11               | 2777993        | 67054       | 77950       | rs199472811 | Neutral    | 0.629    | 0.186        | 0.185    |
| KCNQ1 | 586 | N   | D   | NM_000218.3(KCNQ1):c.1756A>G (p.Asn586Asp) | Congenital long QT syndrome                                                                                                                                                                                                                                                 | not provided                                              | no assertion provided                                | VCV000053014 | 11               | 2777999        | 53014       | 67682       | rs199472812 | Neutral    | 0.664    | 0.216        | 0.119    |
| KCNQ1 | 587 | T   | M   | NM_000218.3(KCNQ1):c.1760C>T (p.Thr587Met) | Jervell and Lange-Nielsen syndrome 1  Cardiovascular phenotype not provided  Congenital long QT syndrome Long QT syndrome                                                                                                                                                   | Pathogenic(Last reviewed: Oct 29, 2020)                   | criteria provided, multiple submitters, no conflicts | VCV000003138 | 11               | 2778003        | 3138        | 18177       | rs120074189 | Neutral    | 0.469    | 0.454        | 0.077    |
| KCNQ1 | 587 | T   | R   | NM_000218.3(KCNQ1):c.1760C>G (p.Thr587Arg) | Long QT syndrome                                                                                                                                                                                                                                                            | Uncertain significance(Last reviewed: Feb 1, 2020)        | criteria provided, single submitter                  | VCV001037124 | 11               | 2778003        | 1037124     | 1030182     | rs120074189 | Neutral    | 0.675    | 0.198        | 0.127    |
| KCNQ1 | 589 | G   | D   | NM_000218.3(KCNQ1):c.1766G>A (p.Gly589Asp) | Long QT syndrome Jervell and Lange-Nielsen syndrome 1 Long QT syndrome 1  Cardiovascular phenotype Long QT syndrome 1  Jervell and Lange-Nielsen syndrome 1  Congenital long QT syndrome Arrhythmia not provided                                                            | Pathogenic(Last reviewed: Feb 5, 2020)                    | criteria provided, multiple submitters, no conflicts | VCV000003140 | 11               | 2778009        | 3140        | 18179       | rs120074190 | LOF        | 0.812    | 0.08         | 0.107    |
| KCNQ1 | 590 | A   | T   | NM_000218.3(KCNQ1):c.1768G>A (p.Ala590Thr) | not provided Long QT syndrome 1 Congenital long QT syndrome Arrhythmia not specified                                                                                                                                                                                        | Conflicting interpretations of                            | criteria provided,                                   | VCV000053015 | 11               | 2778011        | 53015       | 67683       | rs199472813 | Neutral    | 0.628    | 0.278        | 0.093    |

| gene  | pos | aa1 | aa2 | Name                                       | Condition(s)                                                                                                                                                   | Clinical significance (Last reviewed)                                     | Review status                                        | Accession    | GRCh38Chromosome | GRCh38Location | VariationID | AlleleID(s) | dbSNP ID    | prediction | prob.LOF | prob.Neutral | prob.GOF |
|-------|-----|-----|-----|--------------------------------------------|----------------------------------------------------------------------------------------------------------------------------------------------------------------|---------------------------------------------------------------------------|------------------------------------------------------|--------------|------------------|----------------|-------------|-------------|-------------|------------|----------|--------------|----------|
|       |     |     |     |                                            |                                                                                                                                                                | pathogenicity(Last reviewed: May 4, 2021)                                 | conflicting interpretations                          |              |                  |                |             |             |             |            |          |              |          |
| KCNQ1 | 591 | R   | C   | NM_000218.3(KCNQ1):c.1771C>T (p.Arg591Cys) | Congenital long QT syndrome Arrhythmia                                                                                                                         | Uncertain significance(Last reviewed: Feb 18, 2020)                       | criteria provided, single submitter                  | VCV000053016 | 11               | 2778014        | 53016       | 67684       | rs199473483 | Neutral    | 0.673    | 0.249        | 0.079    |
| KCNQ1 | 591 | R   | H   | NM_000218.3(KCNQ1):c.1772G>A (p.Arg591His) | Long QT syndrome not provided Long QT syndrome 1 Congenital long QT syndrome                                                                                   | Pathogenic(Last reviewed: Jan 3, 2022)                                    | criteria provided, multiple submitters, no conflicts | VCV000053017 | 11               | 2778015        | 53017       | 67685       | rs199472814 | Neutral    | 0.641    | 0.28         | 0.078    |
| KCNQ1 | 594 | R   | P   | NM_000218.3(KCNQ1):c.1781G>C (p.Arg594Pro) | not provided Cardiovascular phenotype  Congenital long QT syndrome Long QT syndrome                                                                            | Conflicting interpretations of pathogenicity(Last reviewed: Jan 13, 2022) | criteria provided, conflicting interpretations       | VCV000053019 | 11               | 2778024        | 53019       | 67687       | rs199472815 | Neutral    | 0.623    | 0.289        | 0.088    |
| KCNQ1 | 594 | R   | Q   | NM_000218.3(KCNQ1):c.1781G>A (p.Arg594Gln) | Long QT syndrome Cardiovascular phenotype  Long QT syndrome 1 Congenital long QT syndrome Long QT syndrome 1 Jervell and Lange-Nielsen syndrome 1 not provided | Pathogenic/Likely pathogenic(Last reviewed: Nov 18, 2021)                 | criteria provided, multiple submitters, no conflicts | VCV000053018 | 11               | 2778024        | 53018       | 67686       | rs199472815 | Neutral    | 0.663    | 0.254        | 0.083    |
| KCNQ1 | 596 | E   | K   | NM_000218.3(KCNQ1):c.1786G>A (p.Glu596Lys) | Congenital long QT syndrome Long QT syndrome                                                                                                                   | Uncertain significance(Last reviewed: Apr 20, 2020)                       | criteria provided, single submitter                  | VCV000067055 | 11               | 2778029        | 67055       | 77951       | rs199472816 | LOF        | 0.749    | 0.154        | 0.097    |
| KCNQ1 | 598 | K   | R   | NM_000218.3(KCNQ1):c.1793A>G (p.Lys598Arg) | SUDDEN INFANT DEATH SYNDROME Long QT syndrome 1                                                                                                                | Uncertain significance(Last reviewed: Nov 3, 2021)                        | criteria provided, single submitter                  | VCV000067056 | 11               | 2778036        | 67056       | 77952       | rs199472817 | Neutral    | 0.697    | 0.198        | 0.105    |
| KCNQ2 | 1   | M   | K   | NM_172107.4(KCNQ2):c.2T>A (p.Met1Lys)      | not provided Early infantile epileptic encephalopathy with suppression bursts                                                                                  | Pathogenic/Likely pathogenic(Last reviewed: Dec 2, 2018)                  | criteria provided, multiple submitters, no conflicts | VCV000497690 | 20               | 63472462       | 497690      | 489114      | rs118192186 | LOF        | 0.8      | 0.095        | 0.105    |
| KCNQ2 | 1   | M   | T   | NM_172107.4(KCNQ2):c.2T>C (p.Met1Thr)      | Early infantile epileptic encephalopathy with suppression bursts Benign familial neonatal seizures 1                                                           | Pathogenic(Last reviewed: Jan 15, 2020)                                   | criteria provided, single submitter                  | VCV000021783 | 20               | 63472462       | 21783       | 34635       | rs118192186 | LOF        | 0.8      | 0.092        | 0.108    |
| KCNQ2 | 1   | M   | V   | NM_172107.4(KCNQ2):c.1A>G (p.Met1Val)      | Early infantile epileptic encephalopathy with suppression bursts not provided Benign familial neonatal seizures 1                                              | Pathogenic/Likely pathogenic(Last reviewed: Jun 6, 2020)                  | criteria provided, multiple submitters, no conflicts | VCV000021774 | 20               | 63472463       | 21774       | 34626       | rs118192185 | LOF        | 0.795    | 0.094        | 0.111    |
| KCNQ2 | 4   | K   | N   | NM_172107.4(KCNQ2):c.12G>C (p.Lys4Asn)     | not provided not specified                                                                                                                                     | Uncertain significance(Last reviewed: Feb 26, 2020)                       | criteria provided, single submitter                  | VCV000373753 | 20               | 63472452       | 373753      | 360440      | rs776223064 | LOF        | 0.832    | 0.065        | 0.103    |
| KCNQ2 | 6   | R   | P   | NM_172107.4(KCNQ2):c.17G>C (p.Arg6Pro)     | not provided                                                                                                                                                   | Uncertain significance(Last reviewed: Jun 11, 2019)                       | criteria provided, single submitter                  | VCV000429227 | 20               | 63472447       | 429227      | 422347      | rs866843916 | LOF        | 0.838    | 0.064        | 0.098    |
| KCNQ2 | 8   | G   | C   | NM_172107.4(KCNQ2):c.22G>T (p.Gly8Cys)     | not provided                                                                                                                                                   | Uncertain significance(Last reviewed: Feb 1, 2018)                        | criteria provided, single submitter                  | VCV000450703 | 20               | 63472442       | 450703      | 446297      | rs769045070 | LOF        | 0.813    | 0.078        | 0.11     |
| KCNQ2 | 8   | G   | S   | NM_172107.4(KCNQ2):c.22G>A (p.Gly8Ser)     | Early infantile epileptic encephalopathy with suppression bursts                                                                                               | Uncertain significance(Last reviewed: Jun 4, 2019)                        | criteria provided, single submitter                  | VCV000939478 | 20               | 63472442       | 939478      | 939037      | rs769045070 | LOF        | 0.817    | 0.079        | 0.104    |
| KCNQ2 | 9   | G   | D   | NM_172107.4(KCNQ2):c.26G>A (p.Gly9Asp)     | Early infantile epileptic encephalopathy 7                                                                                                                     | Likely pathogenic(Last reviewed: Jan 1,                                   | criteria provided, single submitter                  | VCV000562034 | 20               | 63472438       | 562034      | 553187      | NA          | LOF        | 0.815    | 0.082        | 0.103    |

| gene  | pos | aa1 | aa2 | Name                                              | Condition(s)                                                                                                | Clinical significance (Last reviewed)                                    | Review status                                        | Accession    | GRCh38Chromosome | GRCh38Location      | VariationID | AlleleID(s) | dbSNP ID     | prediction | prob.LOF | prob.Neutral | prob.GOF |
|-------|-----|-----|-----|---------------------------------------------------|-------------------------------------------------------------------------------------------------------------|--------------------------------------------------------------------------|------------------------------------------------------|--------------|------------------|---------------------|-------------|-------------|--------------|------------|----------|--------------|----------|
|       |     |     |     |                                                   |                                                                                                             | 2017)                                                                    |                                                      |              |                  |                     |             |             |              |            |          |              |          |
| KCNQ2 | 11  | Y   | H   | NM_172107.4(KCNQ2):c.31T>C (p.Tyr11His)           | Early infantile epileptic encephalopathy with suppression bursts                                            | Uncertain significance(Last reviewed: May 7, 2017)                       | criteria provided, single submitter                  | VCV000461420 | 20               | 63472433            | 461420      | 471005      | rs1270851643 | LOF        | 0.816    | 0.07         | 0.114    |
| KCNQ2 | 17  | E   | D   | NM_172107.4(KCNQ2):c.51G>T (p.Glu17Asp)           | Early infantile epileptic encephalopathy 7                                                                  | Uncertain significance(Last reviewed: Jun 28, 2019)                      | criteria provided, single submitter                  | VCV001029261 | 20               | 63472413            | 1029261     | 1018721     | rs2082239531 | LOF        | 0.825    | 0.073        | 0.102    |
| KCNQ2 | 21  | K   | E   | NM_172107.4(KCNQ2):c.61A>G (p.Lys21Glu)           | Early infantile epileptic encephalopathy with suppression bursts                                            | Uncertain significance(Last reviewed: Jun 26, 2020)                      | criteria provided, single submitter                  | VCV001051012 | 20               | 63472403            | 1051012     | 1051788     | NA           | LOF        | 0.848    | 0.053        | 0.099    |
| KCNQ2 | 22  | V   | M   | NM_172107.4(KCNQ2):c.64G>A (p.Val22Met)           | Early infantile epileptic encephalopathy 7 Early infantile epileptic encephalopathy with suppression bursts | Uncertain significance(Last reviewed: Oct 7, 2020)                       | criteria provided, multiple submitters, no conflicts | VCV001023279 | 20               | 63472400            | 1023279     | 1014211     | rs2082239153 | LOF        | 0.825    | 0.087        | 0.088    |
| KCNQ2 | 35  | T   | S   | NM_172107.4(KCNQ2):c.104C>G (p.Thr35Ser)          | Early infantile epileptic encephalopathy with suppression bursts                                            | Uncertain significance(Last reviewed: Jul 30, 2020)                      | criteria provided, single submitter                  | VCV001063140 | 20               | 63472360            | 1063140     | 1051787     | NA           | LOF        | 0.827    | 0.063        | 0.11     |
| KCNQ2 | 40  | L   | P   | NM_172107.4(KCNQ2):c.119T>C (p.Leu40Pro)          | Early infantile epileptic encephalopathy with suppression bursts                                            | Uncertain significance(Last reviewed: Jan 4, 2019)                       | criteria provided, single submitter                  | VCV000852195 | 20               | 63472345            | 852195      | 848549      | rs2082237607 | LOF        | 0.847    | 0.062        | 0.091    |
| KCNQ2 | 43  | A   | V   | NM_172107.4(KCNQ2):c.128C>T (p.Ala43Val)          | Early infantile epileptic encephalopathy with suppression bursts(not provided) Seizures                     | Conflicting interpretations of pathogenicity(Last reviewed: Sep 1, 2020) | criteria provided, conflicting interpretations       | VCV000205939 | 20               | 63472336            | 205939      | 203807      | rs749554385  | LOF        | 0.818    | 0.06         | 0.122    |
| KCNQ2 | 50  | R   | H   | NM_172107.4(KCNQ2):c.149G>A (p.Arg50His)          | Early infantile epileptic encephalopathy with suppression bursts(not provided)                              | Uncertain significance(Last reviewed: Sep 24, 2019)                      | criteria provided, multiple submitters, no conflicts | VCV000425273 | 20               | 63472315            | 425273      | 413607      | rs1064797286 | LOF        | 0.852    | 0.049        | 0.099    |
| KCNQ2 | 53  | I   | T   | NM_172107.4(KCNQ2):c.158T>C (p.Ile53Thr)          | Early infantile epileptic encephalopathy with suppression bursts                                            | Uncertain significance(Last reviewed: Aug 30, 2018)                      | criteria provided, single submitter                  | VCV000639171 | 20               | 63472306            | 639171      | 650470      | rs1038663676 | LOF        | 0.841    | 0.056        | 0.104    |
| KCNQ2 | 57  | P   | S   | NM_172107.4(KCNQ2):c.169C>T (p.Pro57Ser)          | Early infantile epileptic encephalopathy with suppression bursts                                            | Uncertain significance(Last reviewed: Aug 26, 2020)                      | criteria provided, single submitter                  | VCV001057327 | 20               | 63472295            | 1057327     | 1051785     | NA           | LOF        | 0.826    | 0.071        | 0.103    |
| KCNQ2 | 58  | R   | S   | NM_172107.4(KCNQ2):c.171_172delinsAA (p.Arg58Ser) | Early infantile epileptic encephalopathy 7                                                                  | Pathogenic(Last reviewed: Nov 1, 2021)                                   | criteria provided, single submitter                  | VCV001326316 | 20               | 63472292 - 63472293 | 1326316     | 1316718     | NA           | LOF        | 0.839    | 0.057        | 0.104    |
| KCNQ2 | 62  | A   | V   | NM_172107.4(KCNQ2):c.185C>T (p.Ala62Val)          | Early infantile epileptic encephalopathy with suppression bursts(not specified)                             | Likely benign(Last reviewed: Jul 1, 2019)                                | criteria provided, multiple submitters, no conflicts | VCV000205857 | 20               | 63472279            | 205857      | 203806      | rs796052612  | LOF        | 0.798    | 0.073        | 0.129    |
| KCNQ2 | 64  | A   | S   | NM_172107.4(KCNQ2):c.190G>T (p.Ala64Ser)          | Early infantile epileptic encephalopathy with suppression bursts(not specified)                             | Conflicting interpretations of pathogenicity(Last reviewed: Jul 9, 2020) | criteria provided, conflicting interpretations       | VCV000205858 | 20               | 63472274            | 205858      | 203805      | rs780110473  | LOF        | 0.796    | 0.086        | 0.118    |
| KCNQ2 | 67  | P   | A   | NM_172107.4(KCNQ2):c.199C>G (p.Pro67Ala)          | Early infantile epileptic encephalopathy with suppression bursts                                            | Uncertain significance(Last reviewed: Aug 23, 2019)                      | criteria provided, single submitter                  | VCV000842102 | 20               | 63472265            | 842102      | 848548      | rs972841085  | LOF        | 0.843    | 0.059        | 0.098    |
| KCNQ2 | 67  | P   | S   | NM_172107.4(KCNQ2):c.199C>T (p.Pro67Ser)          | Early infantile epileptic encephalopathy 7                                                                  | Uncertain                                                                | criteria                                             | VCV000931897 | 20               | 63472265            | 931897      | 919926      | rs972841085  | LOF        | 0.839    | 0.06         | 0.101    |

| gene  | pos | aa1 | aa2 | Name                                      | Condition(s)                                                                                         | Clinical significance (Last reviewed)               | Review status                                        | Accession    | GRCh38Chromosome | GRCh38Location | VariationID | AlleleID(s) | dbSNP ID     | prediction | prob.LOF | prob.Neutral | prob.GOF |
|-------|-----|-----|-----|-------------------------------------------|------------------------------------------------------------------------------------------------------|-----------------------------------------------------|------------------------------------------------------|--------------|------------------|----------------|-------------|-------------|--------------|------------|----------|--------------|----------|
|       |     |     |     |                                           |                                                                                                      | significance(Last reviewed: Apr 2, 2020)            | provided, single submitter                           |              |                  |                |             |             |              |            |          |              |          |
| KCNQ2 | 80  | F   | S   | NM_172107.4(KCNQ2):c.239T>C (p.Phe80Ser)  | Early infantile epileptic encephalopathy with suppression bursts                                     | Uncertain significance(Last reviewed: Oct 30, 2019) | criteria provided, single submitter                  | VCV000963165 | 20               | 63472225       | 963165      | 951151      | rs2082234077 | LOF        | 0.854    | 0.053        | 0.094    |
| KCNQ2 | 82  | Y   | N   | NM_172107.4(KCNQ2):c.244T>A (p.Tyr82Asn)  | Early infantile epileptic encephalopathy with suppression bursts                                     | Uncertain significance(Last reviewed: Nov 13, 2018) | criteria provided, single submitter                  | VCV000649095 | 20               | 63472220       | 649095      | 650471      | rs1600885336 | LOF        | 0.818    | 0.05         | 0.132    |
| KCNQ2 | 85  | L   | P   | NM_172107.4(KCNQ2):c.254T>C (p.Leu85Pro)  | Early infantile epileptic encephalopathy with suppression bursts                                     | Uncertain significance(Last reviewed: Mar 6, 2020)  | criteria provided, single submitter                  | VCV000962209 | 20               | 63472210       | 962209      | 951150      | rs2082233689 | LOF        | 0.846    | 0.066        | 0.088    |
| KCNQ2 | 88  | P   | Q   | NM_172107.4(KCNQ2):c.263C>A (p.Pro88Gln)  | Early infantile epileptic encephalopathy with suppression bursts                                     | Uncertain significance(Last reviewed: Sep 16, 2020) | criteria provided, single submitter                  | VCV001058247 | 20               | 63472201       | 1058247     | 1051784     | NA           | LOF        | 0.865    | 0.04         | 0.095    |
| KCNQ2 | 96  | H   | N   | NM_172107.4(KCNQ2):c.286C>A (p.His96Asn)  | Epileptic encephalopathy, early infantile, 1                                                         | Pathogenic(Last reviewed: Jan 1, 2019)              | no assertion criteria provided                       | VCV000975416 | 20               | 63472178       | 975416      | 963918      | rs2082232988 | LOF        | 0.852    | 0.052        | 0.096    |
| KCNQ2 | 96  | H   | P   | NM_172107.4(KCNQ2):c.287A>C (p.His96Pro)  | not provided                                                                                         | Likely pathogenic(Last reviewed: Jun 22, 2015)      | criteria provided, single submitter                  | VCV000372576 | 20               | 63472177       | 372576      | 360479      | rs868055567  | LOF        | 0.859    | 0.054        | 0.088    |
| KCNQ2 | 96  | H   | Y   | NM_172107.4(KCNQ2):c.286C>T (p.His96Tyr)  | Early infantile epileptic encephalopathy with suppression bursts                                     | Uncertain significance(Last reviewed: Apr 9, 2019)  | criteria provided, single submitter                  | VCV000856094 | 20               | 63472178       | 856094      | 848547      | rs2082232988 | LOF        | 0.865    | 0.037        | 0.099    |
| KCNQ2 | 97  | A   | V   | NM_172107.4(KCNQ2):c.290C>T (p.Ala97Val)  | not provided                                                                                         | Uncertain significance(Last reviewed: Oct 1, 2020)  | criteria provided, multiple submitters, no conflicts | VCV000430277 | 20               | 63472174       | 430277      | 422346      | rs1131691879 | LOF        | 0.848    | 0.05         | 0.102    |
| KCNQ2 | 101 | L   | H   | NM_172107.4(KCNQ2):c.302T>A (p.Leu101His) | Early infantile epileptic encephalopathy with suppression bursts                                     | Likely pathogenic(Last reviewed: Feb 1, 2020)       | criteria provided, single submitter                  | VCV000944053 | 20               | 63446832       | 944053      | 929253      | rs2081442073 | LOF        | 0.853    | 0.048        | 0.099    |
| KCNQ2 | 103 | V   | I   | NM_172107.4(KCNQ2):c.307G>A (p.Val103Ile) | Early infantile epileptic encephalopathy with suppression bursts(not provided)                       | Uncertain significance(Last reviewed: Mar 10, 2020) | criteria provided, multiple submitters, no conflicts | VCV000450514 | 20               | 63446827       | 450514      | 446295      | rs1555874588 | LOF        | 0.816    | 0.042        | 0.143    |
| KCNQ2 | 104 | F   | S   | NM_172107.4(KCNQ2):c.311T>C (p.Phe104Ser) | not provided                                                                                         | Likely pathogenic(Last reviewed: Mar 22, 2017)      | criteria provided, single submitter                  | VCV000424370 | 20               | 63446823       | 424370      | 410835      | rs1064796940 | LOF        | 0.858    | 0.05         | 0.092    |
| KCNQ2 | 106 | C   | G   | NM_172107.4(KCNQ2):c.316T>G (p.Cys106Gly) | Early infantile epileptic encephalopathy 7                                                           | Likely pathogenic                                   | criteria provided, single submitter                  | VCV001332854 | 20               | 63446818       | 1332854     | 1323572     | NA           | LOF        | 0.852    | 0.064        | 0.083    |
| KCNQ2 | 107 | L   | F   | NM_172107.4(KCNQ2):c.319C>T (p.Leu107Phe) | Early infantile epileptic encephalopathy with suppression bursts Benign familial neonatal seizures 1 | Pathogenic(Last reviewed: Oct 8, 2018)              | criteria provided, single submitter                  | VCV000219241 | 20               | 63446815       | 219241      | 217263      | rs864321712  | LOF        | 0.825    | 0.042        | 0.133    |
| KCNQ2 | 107 | L   | P   | NM_172107.4(KCNQ2):c.320T>C (p.Leu107Pro) | not provided                                                                                         | Uncertain significance(Last reviewed: Feb 1, 2017)  | criteria provided, single submitter                  | VCV000444571 | 20               | 63446814       | 444571      | 438211      | rs1555874569 | LOF        | 0.846    | 0.059        | 0.094    |
| KCNQ2 | 108 | V   | M   | NM_172107.4(KCNQ2):c.322G>A (p.Val108Met) | not provided Early infantile epileptic encephalopathy with suppression bursts                        | Uncertain significance(Last reviewed: Oct 8,        | criteria provided, multiple                          | VCV000391566 | 20               | 63446812       | 391566      | 378224      | rs749164961  | LOF        | 0.829    | 0.04         | 0.132    |

| gene  | pos | aa1 | aa2 | Name                                               | Condition(s)                                                                                                                                                                                                               | Clinical significance (Last reviewed)                                    | Review status                                        | Accession    | GRCh38Chromosome | GRCh38Location      | VariationID | AlleleID(s) | dbSNP ID     | prediction | prob.LOF | prob.Neutral | prob.GOF |
|-------|-----|-----|-----|----------------------------------------------------|----------------------------------------------------------------------------------------------------------------------------------------------------------------------------------------------------------------------------|--------------------------------------------------------------------------|------------------------------------------------------|--------------|------------------|---------------------|-------------|-------------|--------------|------------|----------|--------------|----------|
|       |     |     |     |                                                    |                                                                                                                                                                                                                            | 2019)                                                                    | submitters, no conflicts                             |              |                  |                     |             |             |              |            |          |              |          |
| KCNQ2 | 112 | F   | L   | NM_172107.4(KCNQ2):c.336T>G (p.Phe112Leu)          | Early infantile epileptic encephalopathy with suppression bursts                                                                                                                                                           | Uncertain significance(Last reviewed: Apr 10, 2020)                      | criteria provided, single submitter                  | VCV000846358 | 20               | 63446798            | 846358      | 848546      | rs2081440418 | LOF        | 0.859    | 0.036        | 0.105    |
| KCNQ2 | 113 | S   | F   | NM_172107.4(KCNQ2):c.338C>T (p.Ser113Phe)          | Early infantile epileptic encephalopathy with suppression bursts(not provided)                                                                                                                                             | Conflicting interpretations of pathogenicity(Last reviewed: Dec 4, 2019) | criteria provided, conflicting interpretations       | VCV000205862 | 20               | 63446796            | 205862      | 203800      | rs796052616  | LOF        | 0.869    | 0.036        | 0.094    |
| KCNQ2 | 113 | S   | Y   | NM_172107.4(KCNQ2):c.338_339delinsAT (p.Ser113Tyr) | not provided                                                                                                                                                                                                               | Likely pathogenic(Last reviewed: Apr 27, 2017)                           | criteria provided, single submitter                  | VCV000449878 | 20               | 63446795 - 63446796 | 449878      | 446294      | rs1555874555 | LOF        | 0.864    | 0.038        | 0.098    |
| KCNQ2 | 114 | T   | A   | NM_172107.4(KCNQ2):c.340A>G (p.Thr114Ala)          | Benign familial neonatal seizures 1                                                                                                                                                                                        | Pathogenic(Last reviewed: Mar 31, 2016)                                  | no assertion criteria provided                       | VCV000369741 | 20               | 63446794            | 369741      | 354032      | rs1057516076 | LOF        | 0.853    | 0.044        | 0.103    |
| KCNQ2 | 114 | T   | I   | NM_172107.4(KCNQ2):c.341C>T (p.Thr114Ile)          | Early infantile epileptic encephalopathy 7                                                                                                                                                                                 | Pathogenic(Last reviewed: Mar 31, 2016)                                  | no assertion criteria provided                       | VCV000369742 | 20               | 63446793            | 369742      | 354031      | rs1057516077 | LOF        | 0.879    | 0.031        | 0.089    |
| KCNQ2 | 114 | T   | P   | NM_172107.4(KCNQ2):c.340A>C (p.Thr114Pro)          | not provided                                                                                                                                                                                                               | Likely pathogenic(Last reviewed: Jul 7, 2020)                            | criteria provided, single submitter                  | VCV001197529 | 20               | 63446794            | 1197529     | 1188893     | NA           | LOF        | 0.851    | 0.057        | 0.092    |
| KCNQ2 | 114 | T   | S   | NM_172107.4(KCNQ2):c.341C>G (p.Thr114Ser)          | Early infantile epileptic encephalopathy with suppression bursts                                                                                                                                                           | Uncertain significance(Last reviewed: Apr 25, 2019)                      | criteria provided, single submitter                  | VCV000952581 | 20               | 63446793            | 952581      | 929252      | rs1057516077 | LOF        | 0.841    | 0.053        | 0.106    |
| KCNQ2 | 119 | E   | G   | NM_172107.4(KCNQ2):c.356A>G (p.Glu119Gly)          | Benign familial neonatal seizures 1                                                                                                                                                                                        | Pathogenic(Last reviewed: Mar 31, 2016)                                  | no assertion criteria provided                       | VCV000021786 | 20               | 63446778            | 21786       | 34638       | rs118192193  | LOF        | 0.866    | 0.048        | 0.086    |
| KCNQ2 | 122 | S   | L   | NM_172107.4(KCNQ2):c.365C>T (p.Ser122Leu)          | Early infantile epileptic encephalopathy with suppression bursts(KCNQ2-Related Disorders) not provided Benign familial neonatal seizures 1 Early infantile epileptic encephalopathy 7  Benign familial neonatal seizures 1 | Pathogenic/Likely pathogenic(Last reviewed: Jun 5, 2020)                 | criteria provided, multiple submitters, no conflicts | VCV000021787 | 20               | 63446769            | 21787       | 34639       | rs118192194  | LOF        | 0.886    | 0.028        | 0.086    |
| KCNQ2 | 127 | Y   | C   | NM_172107.4(KCNQ2):c.380A>G (p.Tyr127Cys)          | Early infantile epileptic encephalopathy with suppression bursts(not provided)                                                                                                                                             | Pathogenic/Likely pathogenic(Last reviewed: Dec 10, 2020)                | criteria provided, multiple submitters, no conflicts | VCV000205863 | 20               | 63446754            | 205863      | 203799      | rs796052617  | LOF        | 0.856    | 0.041        | 0.104    |
| KCNQ2 | 129 | L   | V   | NM_172107.4(KCNQ2):c.385C>G (p.Leu129Val)          | Benign familial neonatal seizures 1 Early infantile epileptic encephalopathy 7                                                                                                                                             | Likely pathogenic(Last reviewed: Nov 1, 2021)                            | criteria provided, single submitter                  | VCV001326323 | 20               | 63446749            | 1326323     | 1316725     | NA           | LOF        | 0.846    | 0.041        | 0.112    |
| KCNQ2 | 130 | E   | K   | NM_172107.4(KCNQ2):c.388G>A (p.Glu130Lys)          | Early infantile epileptic encephalopathy 7                                                                                                                                                                                 | Pathogenic                                                               | no assertion criteria provided                       | VCV000219238 | 20               | 63445364            | 219238      | 217262      | rs864321710  | LOF        | 0.865    | 0.038        | 0.097    |
| KCNQ2 | 132 | V   | L   | NM_172107.4(KCNQ2):c.394G>T (p.Val132Leu)          | Early infantile epileptic encephalopathy with suppression bursts                                                                                                                                                           | Uncertain significance(Last reviewed: Aug 7, 2018)                       | criteria provided, single submitter                  | VCV000656207 | 20               | 63445358            | 656207      | 650473      | rs1600789325 | LOF        | 0.836    | 0.04         | 0.124    |
| KCNQ2 | 132 | V   | M   | NM_172107.4(KCNQ2):c.394G>A (p.Val132Met)          | Benign familial neonatal seizures 1 Early infantile epileptic encephalopathy 7 Early infantile epileptic encephalopathy with suppression bursts(not provided)                                                              | Conflicting interpretations of pathogenicity(Last reviewed: Nov 1, 2021) | criteria provided, conflicting interpretations       | VCV000872263 | 20               | 63445358            | 872263      | 860674      | rs1600789325 | LOF        | 0.843    | 0.04         | 0.117    |
| KCNQ2 | 134 | I   | V   | NM_172107.4(KCNQ2):c.400A>G (p.Ile134Val)          | Early infantile epileptic encephalopathy with suppression bursts                                                                                                                                                           | Uncertain significance(Last reviewed: Jul 13, 2020)                      | criteria provided, single submitter                  | VCV001009644 | 20               | 63445352            | 1009644     | 999090      | rs2081381281 | LOF        | 0.837    | 0.042        | 0.121    |



| gene  | pos | aa1 | aa2 | Name                                      | Condition(s)                                                                                                                                                                           | Clinical significance (Last reviewed)                                    | Review status                                        | Accession    | GRCh38Chromosome | GRCh38Location | VariationID | AlleleID(s) | dbSNP ID     | prediction | prob.LOF | prob.Neutral | prob.GOF |
|-------|-----|-----|-----|-------------------------------------------|----------------------------------------------------------------------------------------------------------------------------------------------------------------------------------------|--------------------------------------------------------------------------|------------------------------------------------------|--------------|------------------|----------------|-------------|-------------|--------------|------------|----------|--------------|----------|
| KCNQ2 | 135 | V   | L   | NM_172107.4(KCNQ2):c.403G>T (p.Val135Leu) | Early infantile epileptic encephalopathy with suppression bursts                                                                                                                       | Uncertain significance(Last reviewed: Feb 22, 2020)                      | criteria provided, single submitter                  | VCV000937749 | 20               | 63445349       | 937749      | 939035      | rs775649577  | LOF        | 0.836    | 0.04         | 0.124    |
| KCNQ2 | 139 | V   | M   | NM_172107.4(KCNQ2):c.415G>A (p.Val139Met) | not provided                                                                                                                                                                           | Uncertain significance(Last reviewed: Jul 19, 2017)                      | criteria provided, single submitter                  | VCV000450575 | 20               | 63445337       | 450575      | 446293      | rs773083197  | LOF        | 0.844    | 0.04         | 0.117    |
| KCNQ2 | 144 | R   | G   | NM_172107.4(KCNQ2):c.430C>G (p.Arg144Gly) | Early infantile epileptic encephalopathy 7 KCNQ2-Related Disorders Inborn genetic diseases                                                                                             | Likely pathogenic(Last reviewed: Dec 6, 2019)                            | criteria provided, multiple submitters, no conflicts | VCV000520399 | 20               | 63445322       | 520399      | 511019      | rs1555873985 | LOF        | 0.773    | 0.077        | 0.15     |
| KCNQ2 | 144 | R   | Q   | NM_172107.4(KCNQ2):c.431G>A (p.Arg144Gln) | Early infantile epileptic encephalopathy with suppression bursts Early infantile epileptic encephalopathy 7 Intellectual disability not provided                                       | Pathogenic/Likely pathogenic(Last reviewed: Oct 23, 2020)                | criteria provided, multiple submitters, no conflicts | VCV000205864 | 20               | 63445321       | 205864      | 203798      | rs796052618  | LOF        | 0.724    | 0.047        | 0.229    |
| KCNQ2 | 144 | R   | W   | NM_172107.4(KCNQ2):c.430C>T (p.Arg144Trp) | Benign familial neonatal seizures 1 Early infantile epileptic encephalopathy 7 Early infantile epileptic encephalopathy 7 Intellectual disability Inborn genetic diseases not provided | Conflicting interpretations of pathogenicity(Last reviewed: Oct 1, 2020) | criteria provided, conflicting interpretations       | VCV000452487 | 20               | 63445322       | 452487      | 446292      | NA           | LOF        | 0.825    | 0.039        | 0.136    |
| KCNQ2 | 146 | W   | R   | NM_172107.4(KCNQ2):c.436T>A (p.Trp146Arg) | not specified                                                                                                                                                                          | Uncertain significance(Last reviewed: Jun 26, 2017)                      | criteria provided, single submitter                  | VCV000432987 | 20               | 63445316       | 432987      | 426355      | rs1555873982 | LOF        | 0.876    | 0.039        | 0.084    |
| KCNQ2 | 147 | A   | P   | NM_172107.4(KCNQ2):c.439G>C (p.Ala147Pro) | Seizures                                                                                                                                                                               | Uncertain significance(Last reviewed: Jan 30, 2017)                      | criteria provided, single submitter                  | VCV000590026 | 20               | 63445313       | 590026      | 580568      | rs1568941739 | LOF        | 0.829    | 0.089        | 0.082    |
| KCNQ2 | 148 | A   | T   | NM_172107.4(KCNQ2):c.442G>A (p.Ala148Thr) | Early infantile epileptic encephalopathy with suppression bursts                                                                                                                       | Uncertain significance(Last reviewed: Nov 16, 2019)                      | criteria provided, single submitter                  | VCV000967422 | 20               | 63445310       | 967422      | 958870      | rs2081379814 | LOF        | 0.847    | 0.066        | 0.088    |
| KCNQ2 | 154 | Y   | D   | NM_172107.4(KCNQ2):c.460T>G (p.Tyr154Asp) | Benign familial neonatal seizures 1                                                                                                                                                    | Pathogenic(Last reviewed: Mar 31, 2016)                                  | no assertion criteria provided                       | VCV000369743 | 20               | 63445292       | 369743      | 354030      | rs1057516078 | LOF        | 0.871    | 0.043        | 0.086    |
| KCNQ2 | 155 | R   | C   | NM_172107.4(KCNQ2):c.463C>T (p.Arg155Cys) | not provided                                                                                                                                                                           | Uncertain significance(Last reviewed: Oct 2, 2015)                       | criteria provided, single submitter                  | VCV000283735 | 20               | 63445289       | 283735      | 267972      | rs886042698  | LOF        | 0.859    | 0.042        | 0.098    |
| KCNQ2 | 155 | R   | H   | NM_172107.4(KCNQ2):c.464G>A (p.Arg155His) | Early infantile epileptic encephalopathy with suppression bursts                                                                                                                       | Uncertain significance(Last reviewed: Nov 4, 2019)                       | criteria provided, single submitter                  | VCV000965462 | 20               | 63445288       | 965462      | 958869      | rs779076192  | LOF        | 0.867    | 0.036        | 0.097    |
| KCNQ2 | 158 | R   | K   | NM_172107.4(KCNQ2):c.473G>A (p.Arg158Lys) | Early infantile epileptic encephalopathy with suppression bursts                                                                                                                       | Uncertain significance(Last reviewed: Aug 2, 2020)                       | criteria provided, single submitter                  | VCV001053573 | 20               | 63445279       | 1053573     | 1051783     | NA           | LOF        | 0.827    | 0.09         | 0.083    |
| KCNQ2 | 159 | G   | E   | NM_172107.4(KCNQ2):c.476G>A (p.Gly159Glu) | Benign familial neonatal seizures 1                                                                                                                                                    | Pathogenic(Last reviewed: Mar 31, 2016)                                  | no assertion criteria provided                       | VCV000369747 | 20               | 63445276       | 369747      | 354027      | rs1057516081 | LOF        | 0.852    | 0.056        | 0.093    |
| KCNQ2 | 159 | G   | R   | NM_172107.4(KCNQ2):c.475G>A (p.Gly159Arg) | Benign familial neonatal seizures 1                                                                                                                                                    | Pathogenic(Last reviewed: Mar 31, 2016)                                  | no assertion criteria provided                       | VCV000369746 | 20               | 63445277       | 369746      | 354028      | rs1057516080 | LOF        | 0.867    | 0.045        | 0.088    |
| KCNQ2 | 159 | G   | V   | NM_172107.4(KCNQ2):c.476G>T (p.Gly159Val) | Early infantile epileptic encephalopathy 7                                                                                                                                             | Likely pathogenic(Last reviewed: Mar 27, 2017)                           | no assertion criteria provided                       | VCV000438297 | 20               | 63445276       | 438297      | 431924      | rs1057516081 | LOF        | 0.881    | 0.042        | 0.076    |
| KCNQ2 | 160 | R   | P   | NM_172107.4(KCNQ2):c.479G>C               | not specified                                                                                                                                                                          | Uncertain                                                                | criteria                                             | VCV000373279 | 20               | 63445273       | 373279      | 360501      | rs1057518323 | LOF        | 0.824    | 0.05         | 0.126    |

| gene  | pos | aa1 | aa2 | Name                                      | Condition(s)                                                                                                                                                 | Clinical significance (Last reviewed)                                    | Review status                                        | Accession    | GRCh38Chromosome | GRCh38Location | VariationID | AlleleID(s) | dbSNP ID     | prediction | prob.LOF | prob.Neutral | prob.GOF |
|-------|-----|-----|-----|-------------------------------------------|--------------------------------------------------------------------------------------------------------------------------------------------------------------|--------------------------------------------------------------------------|------------------------------------------------------|--------------|------------------|----------------|-------------|-------------|--------------|------------|----------|--------------|----------|
|       |     |     |     | (p.Arg160Pro)                             |                                                                                                                                                              | significance(Last reviewed: Nov 16, 2016)                                | provided, single submitter                           |              |                  |                |             |             |              |            |          |              |          |
| KCNQ2 | 160 | R   | W   | NM_172107.4(KCNQ2):c.478C>T (p.Arg160Trp) | not provided                                                                                                                                                 | Likely pathogenic(Last reviewed: May 29, 2019)                           | criteria provided, single submitter                  | VCV001215427 | 20               | 63445274       | 1215427     | 1205409     | NA           | LOF        | 0.851    | 0.033        | 0.116    |
| KCNQ2 | 161 | L   | P   | NM_172107.4(KCNQ2):c.482T>C (p.Leu161Pro) | not provided                                                                                                                                                 | Uncertain significance(Last reviewed: Mar 4, 2019)                       | criteria provided, single submitter                  | VCV001307528 | 20               | 63445270       | 1307528     | 1298798     | NA           | LOF        | 0.849    | 0.065        | 0.086    |
| KCNQ2 | 162 | K   | R   | NM_172107.4(KCNQ2):c.485A>G (p.Lys162Arg) | not provided Early infantile epileptic encephalopathy with suppression bursts                                                                                | Uncertain significance(Last reviewed: May 21, 2019)                      | criteria provided, multiple submitters, no conflicts | VCV000392510 | 20               | 63445267       | 392510      | 378416      | rs754250122  | LOF        | 0.804    | 0.04         | 0.156    |
| KCNQ2 | 169 | C   | F   | NM_172107.4(KCNQ2):c.506G>T (p.Cys169Phe) | not provided KCNQ2-Related Disorders                                                                                                                         | Likely pathogenic(Last reviewed: Mar 11, 2021)                           | criteria provided, multiple submitters, no conflicts | VCV000418726 | 20               | 63445246       | 418726      | 410832      | rs1064793392 | LOF        | 0.845    | 0.039        | 0.116    |
| KCNQ2 | 169 | C   | R   | NM_172107.4(KCNQ2):c.505T>C (p.Cys169Arg) | not provided                                                                                                                                                 | Likely pathogenic(Last reviewed: Mar 5, 2020)                            | criteria provided, single submitter                  | VCV000450447 | 20               | 63445247       | 450447      | 446291      | rs1555873939 | LOF        | 0.864    | 0.042        | 0.094    |
| KCNQ2 | 170 | V   | L   | NM_172107.4(KCNQ2):c.508G>C (p.Val170Leu) | not provided                                                                                                                                                 | Uncertain significance(Last reviewed: Mar 1, 2021)                       | criteria provided, single submitter                  | VCV001175999 | 20               | 63445244       | 1175999     | 1166355     | NA           | LOF        | 0.76     | 0.037        | 0.203    |
| KCNQ2 | 172 | D   | G   | NM_172107.4(KCNQ2):c.515A>G (p.Asp172Gly) | Early infantile epileptic encephalopathy with suppression bursts                                                                                             | Likely pathogenic(Last reviewed: Dec 14, 2017)                           | criteria provided, single submitter                  | VCV000461422 | 20               | 63444834       | 461422      | 470490      | rs1555873823 | LOF        | 0.843    | 0.065        | 0.092    |
| KCNQ2 | 175 | V   | L   | NM_172107.4(KCNQ2):c.523G>C (p.Val175Leu) | not provided Early infantile epileptic encephalopathy 7                                                                                                      | Pathogenic(Last reviewed: May 29, 2018)                                  | criteria provided, single submitter                  | VCV000369748 | 20               | 63444826       | 369748      | 354026      | rs1057516082 | LOF        | 0.75     | 0.036        | 0.213    |
| KCNQ2 | 177 | I   | V   | NM_172107.4(KCNQ2):c.529A>G (p.Ile177Val) | Early infantile epileptic encephalopathy with suppression bursts                                                                                             | Uncertain significance(Last reviewed: Sep 4, 2019)                       | criteria provided, single submitter                  | VCV000934162 | 20               | 63444820       | 934162      | 939034      | rs542553752  | LOF        | 0.797    | 0.047        | 0.156    |
| KCNQ2 | 178 | A   | T   | NM_172107.4(KCNQ2):c.532G>A (p.Ala178Thr) | not provided Early infantile epileptic encephalopathy with suppression bursts                                                                                | Uncertain significance(Last reviewed: Mar 28, 2019)                      | criteria provided, multiple submitters, no conflicts | VCV000444570 | 20               | 63444817       | 444570      | 438210      | rs1555873790 | LOF        | 0.834    | 0.055        | 0.111    |
| KCNQ2 | 178 | A   | V   | NM_172107.4(KCNQ2):c.533C>T (p.Ala178Val) | Early infantile epileptic encephalopathy 7                                                                                                                   | Likely pathogenic(Last reviewed: Nov 1, 2021)                            | criteria provided, single submitter                  | VCV001326315 | 20               | 63444816       | 1326315     | 1316717     | NA           | LOF        | 0.824    | 0.047        | 0.129    |
| KCNQ2 | 182 | V   | M   | NM_172107.4(KCNQ2):c.544G>A (p.Val182Met) | Early infantile epileptic encephalopathy with suppression bursts not provided                                                                                | Conflicting interpretations of pathogenicity(Last reviewed: Apr 8, 2020) | criteria provided, conflicting interpretations       | VCV000427046 | 20               | 63444805       | 427046      | 415697      | rs1085307920 | LOF        | 0.77     | 0.037        | 0.193    |
| KCNQ2 | 185 | A   | S   | NM_172107.4(KCNQ2):c.553G>T (p.Ala185Ser) | Early infantile epileptic encephalopathy with suppression bursts                                                                                             | Uncertain significance(Last reviewed: May 14, 2019)                      | criteria provided, single submitter                  | VCV000952406 | 20               | 63444796       | 952406      | 929251      | rs1600786349 | LOF        | 0.828    | 0.068        | 0.105    |
| KCNQ2 | 185 | A   | T   | NM_172107.4(KCNQ2):c.553G>A (p.Ala185Thr) | Benign familial neonatal seizures 1 Early infantile epileptic encephalopathy 7 not provided Early infantile epileptic encephalopathy with suppression bursts | Conflicting interpretations of pathogenicity(Last reviewed: Nov 1,       | criteria provided, conflicting interpretations       | VCV000809271 | 20               | 63444796       | 809271      | 798007      | rs1600786349 | LOF        | 0.834    | 0.058        | 0.108    |

| gene  | pos | aa1 | aa2 | Name                                      | Condition(s)                                                                                                                                     | Clinical significance (Last reviewed)                                     | Review status                                        | Accession    | GRCh38Chromosome | GRCh38Location | VariationID | AlleleID(s) | dbSNP ID     | prediction | prob.LOF | prob.Neutral | prob.GOF |
|-------|-----|-----|-----|-------------------------------------------|--------------------------------------------------------------------------------------------------------------------------------------------------|---------------------------------------------------------------------------|------------------------------------------------------|--------------|------------------|----------------|-------------|-------------|--------------|------------|----------|--------------|----------|
|       |     |     |     |                                           |                                                                                                                                                  | 2021)                                                                     |                                                      |              |                  |                |             |             |              |            |          |              |          |
| KCNQ2 | 185 | A   | V   | NM_172107.4(KCNQ2):c.554C>T (p.Ala185Val) | not provided                                                                                                                                     | Uncertain significance(Last reviewed: May 11, 2017)                       | criteria provided, single submitter                  | VCV000429684 | 20               | 63444795       | 429684      | 422345      | rs1131691529 | LOF        | 0.839    | 0.045        | 0.116    |
| KCNQ2 | 186 | G   | S   | NM_172107.4(KCNQ2):c.556G>A (p.Gly186Ser) | not provided Early infantile epileptic encephalopathy with suppression bursts                                                                    | Conflicting interpretations of pathogenicity(Last reviewed: Jan 6, 2022)  | criteria provided, conflicting interpretations       | VCV000958083 | 20               | 63444793       | 958083      | 951148      | rs2081363570 | LOF        | 0.86     | 0.054        | 0.085    |
| KCNQ2 | 187 | S   | F   | NM_172107.4(KCNQ2):c.560C>T (p.Ser187Phe) | Early infantile epileptic encephalopathy with suppression bursts                                                                                 | Uncertain significance(Last reviewed: Jun 7, 2020)                        | criteria provided, single submitter                  | VCV001020770 | 20               | 63444789       | 1020770     | 1014210     | rs2081363375 | LOF        | 0.877    | 0.034        | 0.089    |
| KCNQ2 | 188 | Q   | K   | NM_172107.4(KCNQ2):c.562C>A (p.Gln188Lys) | Benign familial neonatal seizures 1 Early infantile epileptic encephalopathy 7                                                                   | Likely pathogenic(Last reviewed: Jul 7, 2020)                             | no assertion criteria provided                       | VCV000978712 | 20               | 63444787       | 978712      | 966804      | rs2081363302 | LOF        | 0.885    | 0.038        | 0.077    |
| KCNQ2 | 188 | Q   | P   | NM_172107.4(KCNQ2):c.563A>C (p.Gln188Pro) | not provided                                                                                                                                     | Uncertain significance(Last reviewed: Apr 1, 2019)                        | criteria provided, single submitter                  | VCV000425272 | 20               | 63444786       | 425272      | 413606      | rs1064797285 | LOF        | 0.882    | 0.045        | 0.074    |
| KCNQ2 | 189 | G   | V   | NM_172107.4(KCNQ2):c.566G>T (p.Gly189Val) | Early infantile epileptic encephalopathy 7                                                                                                       | Pathogenic(Last reviewed: Mar 31, 2016)                                   | no assertion criteria provided                       | VCV000369751 | 20               | 63444783       | 369751      | 354025      | rs1057516083 | LOF        | 0.891    | 0.037        | 0.073    |
| KCNQ2 | 190 | N   | K   | NM_172107.4(KCNQ2):c.570C>A (p.Asn190Lys) | Early infantile epileptic encephalopathy with suppression bursts                                                                                 | Uncertain significance(Last reviewed: Mar 23, 2020)                       | criteria provided, single submitter                  | VCV001058699 | 20               | 63444779       | 1058699     | 1051782     | NA           | LOF        | 0.874    | 0.032        | 0.094    |
| KCNQ2 | 191 | V   | I   | NM_172107.4(KCNQ2):c.571G>A (p.Val191Ile) | Early infantile epileptic encephalopathy with suppression bursts                                                                                 | Uncertain significance(Last reviewed: Dec 5, 2017)                        | criteria provided, single submitter                  | VCV000530415 | 20               | 63444778       | 530415      | 534212      | rs745564113  | LOF        | 0.871    | 0.033        | 0.096    |
| KCNQ2 | 193 | A   | D   | NM_172107.4(KCNQ2):c.578C>A (p.Ala193Asp) | not provided                                                                                                                                     | Pathogenic(Last reviewed: May 3, 2012)                                    | criteria provided, single submitter                  | VCV000205865 | 20               | 63444771       | 205865      | 203796      | rs796052619  | LOF        | 0.857    | 0.066        | 0.078    |
| KCNQ2 | 193 | A   | V   | NM_172107.4(KCNQ2):c.578C>T (p.Ala193Val) | Early infantile epileptic encephalopathy 7  Benign familial neonatal seizures 1 Early infantile epileptic encephalopathy with suppression bursts | Conflicting interpretations of pathogenicity(Last reviewed: Sep 15, 2020) | criteria provided, conflicting interpretations       | VCV000977299 | 20               | 63444771       | 977299      | 965428      | rs796052619  | LOF        | 0.877    | 0.044        | 0.079    |
| KCNQ2 | 194 | T   | I   | NM_172107.4(KCNQ2):c.581C>T (p.Thr194Ile) | Early infantile epileptic encephalopathy 7                                                                                                       | Likely pathogenic(Last reviewed: Feb 14, 2020)                            | criteria provided, single submitter                  | VCV000870206 | 20               | 63444768       | 870206      | 858357      | rs2081362775 | LOF        | 0.879    | 0.031        | 0.09     |
| KCNQ2 | 195 | S   | C   | NM_172107.4(KCNQ2):c.584C>G (p.Ser195Cys) | Early infantile epileptic encephalopathy 7  Benign familial neonatal seizures 1 Early infantile epileptic encephalopathy 7                       | Likely pathogenic(Last reviewed: Nov 1, 2021)                             | criteria provided, multiple submitters, no conflicts | VCV000982654 | 20               | 63444765       | 982654      | 971152      | rs1568940442 | LOF        | 0.866    | 0.041        | 0.094    |
| KCNQ2 | 195 | S   | F   | NM_172107.4(KCNQ2):c.584C>T (p.Ser195Phe) | Seizures Early infantile epileptic encephalopathy with suppression bursts                                                                        | Conflicting interpretations of pathogenicity(Last reviewed: Jan 15, 2020) | criteria provided, conflicting interpretations       | VCV000590184 | 20               | 63444765       | 590184      | 580684      | rs1568940442 | LOF        | 0.881    | 0.032        | 0.087    |
| KCNQ2 | 195 | S   | P   | NM_172107.4(KCNQ2):c.583T>C (p.Ser195Pro) | Early infantile epileptic encephalopathy with suppression bursts not provided Early infantile epileptic encephalopathy 7                         | Pathogenic/Likely pathogenic(Last reviewed: Feb 2, 2019)                  | criteria provided, multiple submitters, no conflicts | VCV000205866 | 20               | 63444766       | 205866      | 203795      | rs796052620  | LOF        | 0.851    | 0.057        | 0.091    |
| KCNQ2 | 196 | A   | V   | NM_172107.4(KCNQ2):c.587C>T (p.Ala196Val) | Early infantile epileptic encephalopathy 7  Benign familial neonatal seizures 1 Early                                                            | Pathogenic(Last reviewed: Sep 16,                                         | criteria provided,                                   | VCV000021792 | 20               | 63444762       | 21792       | 34644       | rs118192199  | LOF        | 0.857    | 0.045        | 0.098    |

| gene  | pos | aa1 | aa2 | Name                                      | Condition(s)                                                                                                                                                                                   | Clinical significance (Last reviewed)                                     | Review status                                        | Accession    | GRCh38Chromosome | GRCh38Location | VariationID | AlleleID(s) | dbSNP ID     | prediction | prob.LOF | prob.Neutral | prob.GOF |
|-------|-----|-----|-----|-------------------------------------------|------------------------------------------------------------------------------------------------------------------------------------------------------------------------------------------------|---------------------------------------------------------------------------|------------------------------------------------------|--------------|------------------|----------------|-------------|-------------|--------------|------------|----------|--------------|----------|
|       |     |     |     |                                           | infantile epileptic encephalopathy with suppression bursts not provided                                                                                                                        | 2021)                                                                     | multiple submitters, no conflicts                    |              |                  |                |             |             |              |            |          |              |          |
| KCNQ2 | 197 | L   | P   | NM_172107.4(KCNQ2):c.590T>C (p.Leu197Pro) | Epileptic encephalopathy                                                                                                                                                                       | Likely pathogenic                                                         | no assertion criteria provided                       | VCV000812790 | 20               | 63444759       | 812790      | 801203      | rs1600786071 | LOF        | 0.851    | 0.052        | 0.097    |
| KCNQ2 | 198 | R   | P   | NM_172107.4(KCNQ2):c.593G>C (p.Arg198Pro) | Early infantile epileptic encephalopathy with suppression bursts                                                                                                                               | Likely pathogenic(Last reviewed: Sep 20, 2020)                            | criteria provided, single submitter                  | VCV001066808 | 20               | 63444756       | 1066808     | 1056624     | NA           | GOF        | 0.564    | 0.044        | 0.392    |
| KCNQ2 | 198 | R   | Q   | NM_172107.4(KCNQ2):c.593G>A (p.Arg198Gln) | Early infantile epileptic encephalopathy with suppression bursts See cases Inborn genetic diseases not provided Benign familial neonatal seizures 1 Early infantile epileptic encephalopathy 7 | Pathogenic(Last reviewed: Apr 26, 2021)                                   | criteria provided, multiple submitters, no conflicts | VCV000205867 | 20               | 63444756       | 205867      | 203794      | rs796052621  | GOF        | 0.478    | 0.035        | 0.486    |
| KCNQ2 | 200 | L   | P   | NM_172107.4(KCNQ2):c.599T>C (p.Leu200Pro) | not provided                                                                                                                                                                                   | Likely pathogenic(Last reviewed: Jul 23, 2013)                            | criteria provided, single submitter                  | VCV000205868 | 20               | 63444750       | 205868      | 203793      | rs796052622  | LOF        | 0.855    | 0.05         | 0.095    |
| KCNQ2 | 201 | R   | C   | NM_172107.4(KCNQ2):c.601C>T (p.Arg201Cys) | Early infantile epileptic encephalopathy 7 Early infantile epileptic encephalopathy with suppression bursts not provided Benign familial neonatal seizures 1                                   | Conflicting interpretations of pathogenicity(Last reviewed: Nov 16, 2021) | criteria provided, conflicting interpretations       | VCV000205869 | 20               | 63444748       | 205869      | 203792      | rs796052623  | GOF        | 0.572    | 0.043        | 0.385    |
| KCNQ2 | 201 | R   | H   | NM_172107.4(KCNQ2):c.602G>A (p.Arg201His) | not provided Severe intellectual deficiency Early infantile epileptic encephalopathy with suppression bursts Early infantile epileptic encephalopathy 7                                        | Pathogenic(Last reviewed: Apr 1, 2021)                                    | criteria provided, multiple submitters, no conflicts | VCV000369753 | 20               | 63444747       | 369753      | 354023      | rs1057516085 | GOF        | 0.467    | 0.037        | 0.496    |
| KCNQ2 | 203 | L   | P   | NM_172107.4(KCNQ2):c.608T>C (p.Leu203Pro) | Early infantile epileptic encephalopathy 7                                                                                                                                                     | Pathogenic(Last reviewed: Mar 31, 2016)                                   | no assertion criteria provided                       | VCV000369754 | 20               | 63444741       | 369754      | 354022      | rs1057516086 | LOF        | 0.856    | 0.049        | 0.095    |
| KCNQ2 | 204 | Q   | H   | NM_172107.4(KCNQ2):c.612G>T (p.Gln204His) | not provided                                                                                                                                                                                   | Likely pathogenic(Last reviewed: Nov 23, 2016)                            | criteria provided, single submitter                  | VCV000205872 | 20               | 63444737       | 205872      | 203789      | rs796052625  | GOF        | 0.539    | 0.04         | 0.421    |
| KCNQ2 | 204 | Q   | H   | NM_172107.4(KCNQ2):c.612G>T (p.Gln204His) | not provided                                                                                                                                                                                   | Likely pathogenic(Last reviewed: Nov 23, 2016)                            | criteria provided, single submitter                  | VCV000205872 | 20               | 63444737       | 205872      | 203789      | rs796052625  | GOF        | 0.539    | 0.04         | 0.421    |
| KCNQ2 | 204 | Q   | H   | NM_172107.4(KCNQ2):c.612G>C (p.Gln204His) | not provided                                                                                                                                                                                   | Likely pathogenic(Last reviewed: Sep 2, 2020)                             | criteria provided, single submitter                  | VCV000205871 | 20               | 63444737       | 205871      | 203790      | rs796052625  | GOF        | 0.539    | 0.04         | 0.421    |
| KCNQ2 | 204 | Q   | H   | NM_172107.4(KCNQ2):c.612G>C (p.Gln204His) | not provided                                                                                                                                                                                   | Likely pathogenic(Last reviewed: Sep 2, 2020)                             | criteria provided, single submitter                  | VCV000205871 | 20               | 63444737       | 205871      | 203790      | rs796052625  | GOF        | 0.539    | 0.04         | 0.421    |
| KCNQ2 | 204 | Q   | R   | NM_172107.4(KCNQ2):c.611A>G (p.Gln204Arg) | not provided                                                                                                                                                                                   | Pathogenic(Last reviewed: Sep 11, 2012)                                   | criteria provided, single submitter                  | VCV000205870 | 20               | 63444738       | 205870      | 203791      | rs796052624  | GOF        | 0.629    | 0.036        | 0.335    |
| KCNQ2 | 205 | I   | M   | NM_172107.4(KCNQ2):c.615T>G (p.Ile205Met) | Early infantile epileptic encephalopathy with suppression bursts                                                                                                                               | Uncertain significance(Last reviewed: Jan 8, 2020)                        | criteria provided, single submitter                  | VCV000851348 | 20               | 63444734       | 851348      | 848544      | rs971211988  | LOF        | 0.861    | 0.032        | 0.106    |
| KCNQ2 | 205 | I   | V   | NM_172107.4(KCNQ2):c.613A>G (p.Ile205Val) | Early infantile epileptic encephalopathy 7                                                                                                                                                     | Pathogenic(Last reviewed: Mar 31, 2016)                                   | no assertion criteria provided                       | VCV000369755 | 20               | 63444736       | 369755      | 354021      | rs1057516087 | LOF        | 0.863    | 0.034        | 0.103    |
| KCNQ2 | 206 | L   | P   | NM_172107.4(KCNQ2):c.617T>C (p.Leu206Pro) | Benign familial neonatal seizures 1                                                                                                                                                            | Likely pathogenic(Last reviewed: May 28, 2019)                            | criteria provided, single submitter                  | VCV000803624 | 20               | 63444732       | 803624      | 792001      | rs1339542565 | LOF        | 0.858    | 0.048        | 0.094    |

| gene  | pos | aa1 | aa2 | Name                                      | Condition(s)                                                                                                                                                                                                                                                   | Clinical significance (Last reviewed)                     | Review status                                        | Accession    | GRCh38Chromosome | GRCh38Location | VariationID | AlleleID(s) | dbSNP ID     | prediction | prob.LOF | prob.Neutral | prob.GOF |
|-------|-----|-----|-----|-------------------------------------------|----------------------------------------------------------------------------------------------------------------------------------------------------------------------------------------------------------------------------------------------------------------|-----------------------------------------------------------|------------------------------------------------------|--------------|------------------|----------------|-------------|-------------|--------------|------------|----------|--------------|----------|
| KCNQ2 | 206 | L   | R   | NM_172107.4(KCNQ2):c.617T>G (p.Leu206Arg) | Benign familial neonatal seizures 1 Early infantile epileptic encephalopathy 7 Early infantile epileptic encephalopathy 7                                                                                                                                      | Pathogenic(Last reviewed: Nov 1, 2021)                    | criteria provided, single submitter                  | VCV001326322 | 20               | 63444732       | 1326322     | 1316724     | NA           | LOF        | 0.868    | 0.035        | 0.097    |
| KCNQ2 | 207 | R   | Q   | NM_172107.4(KCNQ2):c.620G>A (p.Arg207Gln) | Early infantile epileptic encephalopathy with suppression bursts Seizures, benign familial neonatal, 1, and/or myokymia Early infantile epileptic encephalopathy 7 Benign familial neonatal seizures 1 not provided Early infantile epileptic encephalopathy 7 | Pathogenic/Likely pathogenic(Last reviewed: Mar 2, 2020)  | criteria provided, multiple submitters, no conflicts | VCV000007391 | 20               | 63444729       | 7391        | 22430       | rs118192200  | GOF        | 0.474    | 0.036        | 0.49     |
| KCNQ2 | 207 | R   | W   | NM_172107.4(KCNQ2):c.619C>T (p.Arg207Trp) | Early infantile epileptic encephalopathy with suppression bursts Benign familial neonatal seizures 1 Seizures, benign familial neonatal, 1, and/or myokymia Inborn genetic diseases not provided                                                               | Pathogenic(Last reviewed: Sep 15, 2021)                   | criteria provided, multiple submitters, no conflicts | VCV000007386 | 20               | 63444730       | 7386        | 22425       | rs74315391   | GOF        | 0.629    | 0.036        | 0.336    |
| KCNQ2 | 208 | M   | V   | NM_172107.4(KCNQ2):c.622A>G (p.Met208Val) | Early infantile epileptic encephalopathy with suppression bursts Benign familial neonatal seizures 1                                                                                                                                                           | Likely pathogenic(Last reviewed: Aug 15, 2019)            | criteria provided, single submitter                  | VCV000021793 | 20               | 63444727       | 21793       | 34645       | rs118192201  | LOF        | 0.868    | 0.034        | 0.098    |
| KCNQ2 | 209 | I   | T   | NM_172107.4(KCNQ2):c.626T>C (p.Ile209Thr) | Seizures                                                                                                                                                                                                                                                       | Pathogenic(Last reviewed: Jan 28, 2020)                   | no assertion criteria provided                       | VCV000812512 | 20               | 63444723       | 812512      | 800755      | rs1600785769 | LOF        | 0.861    | 0.037        | 0.102    |
| KCNQ2 | 210 | R   | C   | NM_172107.4(KCNQ2):c.628C>T (p.Arg210Cys) | Intellectual disability Early infantile epileptic encephalopathy 7 Early infantile epileptic encephalopathy with suppression bursts                                                                                                                            | Pathogenic(Last reviewed: Aug 29, 2019)                   | criteria provided, single submitter                  | VCV000205873 | 20               | 63444721       | 205873      | 203788      | rs796052626  | GOF        | 0.583    | 0.042        | 0.375    |
| KCNQ2 | 210 | R   | H   | NM_172107.4(KCNQ2):c.629G>A (p.Arg210His) | Early infantile epileptic encephalopathy 7 Early infantile epileptic encephalopathy with suppression bursts not provided                                                                                                                                       | Pathogenic(Last reviewed: Sep 1, 2021)                    | criteria provided, multiple submitters, no conflicts | VCV000279931 | 20               | 63444720       | 279931      | 264902      | rs886041262  | GOF        | 0.485    | 0.036        | 0.479    |
| KCNQ2 | 210 | R   | P   | NM_172107.4(KCNQ2):c.629G>C (p.Arg210Pro) | Early infantile epileptic encephalopathy 7 not provided                                                                                                                                                                                                        | Pathogenic(Last reviewed: May 25, 2018)                   | criteria provided, multiple submitters, no conflicts | VCV000280614 | 20               | 63444720       | 280614      | 265110      | rs886041262  | GOF        | 0.575    | 0.043        | 0.382    |
| KCNQ2 | 211 | M   | V   | NM_172107.4(KCNQ2):c.631A>G (p.Met211Val) | not provided                                                                                                                                                                                                                                                   | Likely pathogenic(Last reviewed: Jan 11, 2017)            | criteria provided, single submitter                  | VCV000392705 | 20               | 63444718       | 392705      | 378211      | rs1057524599 | LOF        | 0.869    | 0.033        | 0.098    |
| KCNQ2 | 212 | D   | A   | NM_172107.4(KCNQ2):c.635A>C (p.Asp212Ala) | Early infantile epileptic encephalopathy with suppression bursts                                                                                                                                                                                               | Pathogenic(Last reviewed: Jun 17, 2019)                   | criteria provided, single submitter                  | VCV000944385 | 20               | 63444714       | 944385      | 929250      | rs118192202  | LOF        | 0.822    | 0.04         | 0.137    |
| KCNQ2 | 212 | D   | E   | NM_172107.4(KCNQ2):c.636C>A (p.Asp212Glu) | not provided                                                                                                                                                                                                                                                   | Pathogenic(Last reviewed: Apr 10, 2014)                   | criteria provided, single submitter                  | VCV000205874 | 20               | 63444713       | 205874      | 203787      | rs796052627  | LOF        | 0.797    | 0.041        | 0.162    |
| KCNQ2 | 212 | D   | G   | NM_172107.4(KCNQ2):c.635A>G (p.Asp212Gly) | Benign familial neonatal seizures 1                                                                                                                                                                                                                            | Pathogenic(Last reviewed: Mar 31, 2016)                   | no assertion criteria provided                       | VCV000021794 | 20               | 63444714       | 21794       | 34646       | rs118192202  | LOF        | 0.809    | 0.061        | 0.131    |
| KCNQ2 | 212 | D   | V   | NM_172107.4(KCNQ2):c.635A>T (p.Asp212Val) | not provided                                                                                                                                                                                                                                                   | Likely pathogenic(Last reviewed: Apr 11, 2016)            | criteria provided, single submitter                  | VCV000420930 | 20               | 63444714       | 420930      | 410831      | rs118192202  | LOF        | 0.856    | 0.032        | 0.112    |
| KCNQ2 | 213 | R   | Q   | NM_172107.4(KCNQ2):c.638G>A (p.Arg213Gln) | not provided Early infantile epileptic encephalopathy with suppression bursts Benign familial neonatal seizures 1 Early infantile epileptic encephalopathy 7 Early infantile epileptic encephalopathy 7                                                        | Pathogenic/Likely pathogenic(Last reviewed: Oct 31, 2018) | criteria provided, multiple submitters, no conflicts | VCV000039760 | 20               | 63444711       | 39760       | 48359       | NA           | GOF        | 0.574    | 0.033        | 0.393    |
| KCNQ2 | 213 | R   | W   | NM_172107.4(KCNQ2):c.637C>T (p.Arg213Trp) | Early infantile epileptic encephalopathy with suppression bursts not provided Early infantile epileptic encephalopathy 7 Benign familial neonatal seizures 1                                                                                                   | Pathogenic(Last reviewed: Oct 19, 2020)                   | criteria provided, multiple submitters, no conflicts | VCV000021795 | 20               | 63444712       | 21795       | 34647       | rs118192203  | GOF        | 0.696    | 0.034        | 0.27     |

| gene  | pos | aa1 | aa2 | Name                                      | Condition(s)                                                                                                                                                                                  | Clinical significance (Last reviewed)                                    | Review status                                        | Accession                                      | GRCh38Chromosome                    | GRCh38Location | VariationID | AlleleID(s) | dbSNP ID     | prediction | prob.LOF     | prob.Neutral | prob.GOF |       |       |
|-------|-----|-----|-----|-------------------------------------------|-----------------------------------------------------------------------------------------------------------------------------------------------------------------------------------------------|--------------------------------------------------------------------------|------------------------------------------------------|------------------------------------------------|-------------------------------------|----------------|-------------|-------------|--------------|------------|--------------|--------------|----------|-------|-------|
| KCNQ2 | 214 | R   | P   | NM_172107.4(KCNQ2):c.641G>C (p.Arg214Pro) |                                                                                                                                                                                               |                                                                          | not provided                                         | Likely pathogenic(Last reviewed: Dec 6, 2016)  | criteria provided, single submitter | VCV000373698   | 20          | 63444708    | 373698       | 360499     | rs1057518555 | LOF          | 0.869    | 0.035 | 0.097 |
| KCNQ2 | 214 | R   | Q   | NM_172107.4(KCNQ2):c.641G>A (p.Arg214Gln) | Early infantile epileptic encephalopathy with suppression bursts                                                                                                                              | Pathogenic(Last reviewed: Sep 9, 2020)                                   | criteria provided, single submitter                  | VCV000578032                                   | 20                                  | 63444708       | 578032      | 575133      | rs1057518555 | LOF        | 0.86         | 0.029        | 0.11     |       |       |
| KCNQ2 | 214 | R   | W   | NM_172107.4(KCNQ2):c.640C>T (p.Arg214Trp) | Benign familial neonatal seizures 1[not provided]                                                                                                                                             | Pathogenic/Likely pathogenic(Last reviewed: Nov 1, 2019)                 | criteria provided, multiple submitters, no conflicts | VCV000007385                                   | 20                                  | 63444709       | 7385        | 22424       | rs28939684   | LOF        | 0.868        | 0.032        | 0.099    |       |       |
| KCNQ2 | 215 | G   | R   | NM_172107.4(KCNQ2):c.643G>A (p.Gly215Arg) | Early infantile epileptic encephalopathy 7                                                                                                                                                    | Pathogenic(Last reviewed: Mar 31, 2016)                                  | no assertion criteria provided                       | VCV000369756                                   | 20                                  | 63444706       | 369756      | 354020      | rs1057516088 | LOF        | 0.878        | 0.034        | 0.088    |       |       |
| KCNQ2 | 217 | T   | A   | NM_172107.4(KCNQ2):c.649A>G (p.Thr217Ala) | Benign familial neonatal seizures 1[Early infantile epileptic encephalopathy with suppression bursts]                                                                                         | Uncertain significance(Last reviewed: Jun 30, 2020)                      | criteria provided, single submitter                  | VCV000369757                                   | 20                                  | 63444700       | 369757      | 354019      | rs1057516089 | LOF        | 0.807        | 0.041        | 0.153    |       |       |
| KCNQ2 | 217 | T   | I   | NM_172107.4(KCNQ2):c.650C>T (p.Thr217Ile) | Early infantile epileptic encephalopathy with suppression bursts[Benign familial neonatal seizures 1][Early infantile epileptic encephalopathy 7][Early infantile epileptic encephalopathy 7] | Conflicting interpretations of pathogenicity(Last reviewed: Nov 1, 2021) | criteria provided, conflicting interpretations       | VCV000813779                                   | 20                                  | 63444699       | 813779      | 802038      | NA           | LOF        | 0.855        | 0.03         | 0.115    |       |       |
| KCNQ2 | 217 | T   | N   | NM_172107.4(KCNQ2):c.650C>A (p.Thr217Asn) | Benign familial neonatal seizures 1                                                                                                                                                           | Pathogenic(Last reviewed: Mar 31, 2016)                                  | no assertion criteria provided                       | VCV000369758                                   | 20                                  | 63444699       | 369758      | 354018      | rs1057516090 | LOF        | 0.765        | 0.049        | 0.186    |       |       |
| KCNQ2 | 217 | T   | P   | NM_172107.4(KCNQ2):c.649A>C (p.Thr217Pro) | Benign familial neonatal seizures 1                                                                                                                                                           | Likely pathogenic(Last reviewed: May 28, 2019)                           | criteria provided, single submitter                  | VCV000803623                                   | 20                                  | 63444700       | 803623      | 792000      | rs1057516089 | LOF        | 0.813        | 0.051        | 0.136    |       |       |
| KCNQ2 | 219 | K   | N   | NM_172107.4(KCNQ2):c.657G>C (p.Lys219Asn) |                                                                                                                                                                                               |                                                                          | not provided                                         | Likely pathogenic(Last reviewed: Jan 10, 2017) | criteria provided, single submitter | VCV000391958   | 20          | 63444692    | 391958       | 377148     | rs770290221  | LOF          | 0.802    | 0.041 | 0.157 |
| KCNQ2 | 223 | S   | F   | NM_172107.4(KCNQ2):c.668C>T (p.Ser223Phe) | Benign familial neonatal seizures 1[Early infantile epileptic encephalopathy 7]                                                                                                               | Likely pathogenic(Last reviewed: Nov 1, 2021)                            | criteria provided, single submitter                  | VCV001326326                                   | 20                                  | 63444681       | 1326326     | 1316728     | NA           | LOF        | 0.864        | 0.033        | 0.103    |       |       |
| KCNQ2 | 223 | S   | P   | NM_172107.4(KCNQ2):c.667T>C (p.Ser223Pro) | Early infantile epileptic encephalopathy with suppression bursts                                                                                                                              | Pathogenic(Last reviewed: Dec 20, 2019)                                  | criteria provided, single submitter                  | VCV000841056                                   | 20                                  | 63444682       | 841056      | 848543      | rs2081358991 | LOF        | 0.851        | 0.05         | 0.099    |       |       |
| KCNQ2 | 224 | V   | L   | NM_172107.4(KCNQ2):c.670G>C (p.Val224Leu) | Early infantile epileptic encephalopathy 7                                                                                                                                                    | Likely pathogenic(Last reviewed: Feb 24, 2021)                           | criteria provided, single submitter                  | VCV001048634                                   | 20                                  | 63444679       | 1048634     | 1036749     | NA           | LOF        | 0.848        | 0.034        | 0.118    |       |       |
| KCNQ2 | 228 | H   | Q   | NM_172107.4(KCNQ2):c.684C>A (p.His228Gln) | Early infantile epileptic encephalopathy with suppression bursts[Benign familial neonatal seizures 1]                                                                                         | Likely pathogenic(Last reviewed: Mar 4, 2020)                            | criteria provided, single submitter                  | VCV000021797                                   | 20                                  | 63444665       | 21797       | 34649       | rs118192204  | LOF        | 0.848        | 0.035        | 0.118    |       |       |
| KCNQ2 | 228 | H   | R   | NM_172107.4(KCNQ2):c.683A>G (p.His228Arg) | KCNQ2-Related Disorders                                                                                                                                                                       | not provided                                                             | no assertion provided                                | VCV000972975                                   | 20                                  | 63444666       | 972975      | 961353      | rs2081358611 | LOF        | 0.863        | 0.032        | 0.105    |       |       |
| KCNQ2 | 228 | H   | Y   | NM_172107.4(KCNQ2):c.682C>T (p.His228Tyr) |                                                                                                                                                                                               |                                                                          | not provided                                         | Likely pathogenic(Last reviewed: Aug 31, 2020) | criteria provided, single submitter | VCV000432161   | 20          | 63444667    | 432161       | 426354     | rs1555873665 | LOF          | 0.866    | 0.031 | 0.103 |
| KCNQ2 | 230 | K   | M   | NM_172107.4(KCNQ2):c.689A>T (p.Lys230Met) | Early infantile epileptic encephalopathy with suppression bursts                                                                                                                              | Likely pathogenic(Last reviewed: Jun 19, 2019)                           | criteria provided, single submitter                  | VCV000933711                                   | 20                                  | 63444660       | 933711      | 939033      | rs2081358317 | LOF        | 0.83         | 0.03         | 0.14     |       |       |

| gene  | pos | aa1 | aa2 | Name                                      | Condition(s)                                                                           | Clinical significance (Last reviewed)                                     | Review status                                        | Accession    | GRCh38Chromosome | GRCh38Location | VariationID | AlleleID(s) | dbSNP ID     | prediction | prob.LOF | prob.Neutral | prob.GOF |
|-------|-----|-----|-----|-------------------------------------------|----------------------------------------------------------------------------------------|---------------------------------------------------------------------------|------------------------------------------------------|--------------|------------------|----------------|-------------|-------------|--------------|------------|----------|--------------|----------|
| KCNQ2 | 231 | E   | D   | NM_172107.4(KCNQ2):c.693G>T (p.Glu231Asp) | Seizures                                                                               | Pathogenic/Likely pathogenic(Last reviewed: Dec 13, 2016)                 | criteria provided, multiple submitters, no conflicts | VCV000211234 | 20               | 63442529       | 211234      | 208706      | rs797044938  | LOF        | 0.833    | 0.049        | 0.118    |
| KCNQ2 | 231 | E   | D   | NM_172107.4(KCNQ2):c.693G>T (p.Glu231Asp) | Seizures                                                                               | Pathogenic/Likely pathogenic(Last reviewed: Dec 13, 2016)                 | criteria provided, multiple submitters, no conflicts | VCV000211234 | 20               | 63442529       | 211234      | 208706      | rs797044938  | LOF        | 0.833    | 0.049        | 0.118    |
| KCNQ2 | 231 | E   | D   | NM_172107.4(KCNQ2):c.693G>C (p.Glu231Asp) | Inborn genetic diseases                                                                | Pathogenic(Last reviewed: Apr 8, 2015)                                    | criteria provided, single submitter                  | VCV000208761 | 20               | 63442529       | 208761      | 205322      | rs797044938  | LOF        | 0.833    | 0.049        | 0.118    |
| KCNQ2 | 231 | E   | D   | NM_172107.4(KCNQ2):c.693G>C (p.Glu231Asp) | Inborn genetic diseases                                                                | Pathogenic(Last reviewed: Apr 8, 2015)                                    | criteria provided, single submitter                  | VCV000208761 | 20               | 63442529       | 208761      | 205322      | rs797044938  | LOF        | 0.833    | 0.049        | 0.118    |
| KCNQ2 | 231 | E   | G   | NM_172107.4(KCNQ2):c.692A>G (p.Glu231Gly) | not provided                                                                           | Pathogenic(Last reviewed: May 9, 2013)                                    | criteria provided, single submitter                  | VCV000205876 | 20               | 63442530       | 205876      | 203784      | rs796052629  | LOF        | 0.838    | 0.058        | 0.103    |
| KCNQ2 | 231 | E   | Q   | NM_172107.4(KCNQ2):c.691G>C (p.Glu231Gln) | not provided                                                                           | Pathogenic(Last reviewed: Aug 18, 2015)                                   | criteria provided, single submitter                  | VCV000419718 | 20               | 63442531       | 419718      | 410830      | rs1064794063 | LOF        | 0.839    | 0.039        | 0.122    |
| KCNQ2 | 234 | T   | I   | NM_172107.4(KCNQ2):c.701C>T (p.Thr234Ile) | Early infantile epileptic encephalopathy with suppression bursts Seizures not provided | Conflicting interpretations of pathogenicity(Last reviewed: Oct 22, 2019) | criteria provided, conflicting interpretations       | VCV000197892 | 20               | 63442521       | 197892      | 195053      | rs794727741  | LOF        | 0.864    | 0.033        | 0.103    |
| KCNQ2 | 234 | T   | P   | NM_172107.4(KCNQ2):c.700A>C (p.Thr234Pro) | Early infantile epileptic encephalopathy 7                                             | Pathogenic(Last reviewed: Mar 31, 2016)                                   | no assertion criteria provided                       | VCV000369759 | 20               | 63442522       | 369759      | 354017      | rs1057516091 | LOF        | 0.839    | 0.062        | 0.098    |
| KCNQ2 | 235 | A   | T   | NM_172107.4(KCNQ2):c.703G>A (p.Ala235Thr) | Early infantile epileptic encephalopathy with suppression bursts not provided          | Uncertain significance(Last reviewed: Oct 1, 2020)                        | criteria provided, multiple submitters, no conflicts | VCV000872261 | 20               | 63442519       | 872261      | 860672      | rs2081192615 | LOF        | 0.845    | 0.062        | 0.093    |
| KCNQ2 | 235 | A   | V   | NM_172107.4(KCNQ2):c.704C>T (p.Ala235Val) | Seizures Early infantile epileptic encephalopathy 7                                    | Likely pathogenic(Last reviewed: Aug 16, 2018)                            | criteria provided, multiple submitters, no conflicts | VCV000211235 | 20               | 63442518       | 211235      | 208705      | rs797045638  | LOF        | 0.861    | 0.045        | 0.094    |
| KCNQ2 | 236 | W   | R   | NM_172107.4(KCNQ2):c.706T>C (p.Trp236Arg) | Early infantile epileptic encephalopathy 7                                             | Likely pathogenic(Last reviewed: Oct 2, 2021)                             | criteria provided, single submitter                  | VCV001320124 | 20               | 63442516       | 1320124     | 1310369     | NA           | LOF        | 0.875    | 0.036        | 0.089    |
| KCNQ2 | 237 | Y   | C   | NM_172107.4(KCNQ2):c.710A>G (p.Tyr237Cys) | Inborn genetic diseases                                                                | Pathogenic(Last reviewed: Sep 24, 2013)                                   | criteria provided, single submitter                  | VCV000208758 | 20               | 63442512       | 208758      | 205321      | rs797044935  | LOF        | 0.848    | 0.042        | 0.11     |
| KCNQ2 | 238 | I   | L   | NM_172107.4(KCNQ2):c.712A>C (p.Ile238Leu) | not provided                                                                           | Likely pathogenic(Last reviewed: Jan 30, 2018)                            | criteria provided, single submitter                  | VCV000421609 | 20               | 63442510       | 421609      | 410829      | rs747050726  | LOF        | 0.809    | 0.036        | 0.155    |
| KCNQ2 | 238 | I   | V   | NM_172107.4(KCNQ2):c.712A>G (p.Ile238Val) | Early infantile epileptic encephalopathy with suppression bursts                       | Uncertain significance(Last reviewed: Oct 3, 2017)                        | criteria provided, single submitter                  | VCV000530433 | 20               | 63442510       | 530433      | 533636      | rs747050726  | LOF        | 0.822    | 0.039        | 0.139    |
| KCNQ2 | 239 | G   | R   | NM_172107.4(KCNQ2):c.715G>C (p.Gly239Arg) | Early infantile epileptic encephalopathy 7                                             | Pathogenic(Last reviewed: Mar 31, 2016)                                   | no assertion criteria provided                       | VCV000369760 | 20               | 63442507       | 369760      | 354016      | rs1057516092 | LOF        | 0.879    | 0.041        | 0.08     |
| KCNQ2 | 239 | G   | V   | NM_172107.4(KCNQ2):c.716G>T (p.Gly239Val) | Benign familial neonatal seizures 1 not provided                                       | Conflicting interpretations of pathogenicity(Last reviewed: Oct 22, 2019) | criteria provided, conflicting                       | VCV000205877 | 20               | 63442506       | 205877      | 203783      | rs796052630  | LOF        | 0.88     | 0.037        | 0.082    |

| gene  | pos | aa1 | aa2 | Name                                      | Condition(s)                                                                                                                                    | Clinical significance (Last reviewed)                    | Review status                                        | Accession    | GRCh38Chromosome | GRCh38Location | VariationID | AlleleID(s) | dbSNP ID     | prediction | prob.LOF | prob.Neutral | prob.GOF |
|-------|-----|-----|-----|-------------------------------------------|-------------------------------------------------------------------------------------------------------------------------------------------------|----------------------------------------------------------|------------------------------------------------------|--------------|------------------|----------------|-------------|-------------|--------------|------------|----------|--------------|----------|
|       |     |     |     |                                           |                                                                                                                                                 | reviewed: May 28, 2019)                                  | interpretations                                      |              |                  |                |             |             |              |            |          |              |          |
| KCNQ2 | 242 | C   | G   | NM_172107.4(KCNQ2):c.724T>G (p.Cys242Gly) | KCNQ2-Related Disorders                                                                                                                         | Likely pathogenic(Last reviewed: Mar 26, 2018)           | no assertion criteria provided                       | VCV000545120 | 20               | 63442498       | 545120      | 535384      | rs1555871915 | LOF        | 0.848    | 0.069        | 0.083    |
| KCNQ2 | 243 | L   | F   | NM_172107.4(KCNQ2):c.727C>T (p.Leu243Phe) | Benign familial neonatal seizures 1                                                                                                             | Pathogenic(Last reviewed: Mar 31, 2016)                  | no assertion criteria provided                       | VCV000021798 | 20               | 63442495       | 21798       | 34650       | rs118192205  | LOF        | 0.836    | 0.041        | 0.123    |
| KCNQ2 | 243 | L   | V   | NM_172107.4(KCNQ2):c.727C>G (p.Leu243Val) | Early infantile epileptic encephalopathy 7                                                                                                      | Likely pathogenic(Last reviewed: Jan 6, 2018)            | criteria provided, single submitter                  | VCV000692002 | 20               | 63442495       | 692002      | 679811      | rs118192205  | LOF        | 0.838    | 0.043        | 0.119    |
| KCNQ2 | 245 | L   | P   | NM_172107.4(KCNQ2):c.734T>C (p.Leu245Pro) | Early infantile epileptic encephalopathy with suppression bursts                                                                                | Pathogenic(Last reviewed: Sep 8, 2020)                   | criteria provided, single submitter                  | VCV001074752 | 20               | 63442488       | 1074752     | 1064859     | NA           | LOF        | 0.847    | 0.059        | 0.094    |
| KCNQ2 | 247 | S   | L   | NM_172107.4(KCNQ2):c.740C>T (p.Ser247Leu) | Inborn genetic diseases(not provided)                                                                                                           | Pathogenic/Likely pathogenic(Last reviewed: Dec 1, 2020) | criteria provided, multiple submitters, no conflicts | VCV000205878 | 20               | 63442482       | 205878      | 203782      | rs74315392   | LOF        | 0.868    | 0.033        | 0.099    |
| KCNQ2 | 247 | S   | P   | NM_172107.4(KCNQ2):c.739T>C (p.Ser247Pro) | Early infantile epileptic encephalopathy 7                                                                                                      | Likely pathogenic(Last reviewed: Aug 22, 2018)           | criteria provided, single submitter                  | VCV000813771 | 20               | 63442483       | 813771      | 802036      | NA           | LOF        | 0.847    | 0.062        | 0.091    |
| KCNQ2 | 247 | S   | W   | NM_172107.4(KCNQ2):c.740C>G (p.Ser247Trp) | Early infantile epileptic encephalopathy with suppression bursts Early infantile epileptic encephalopathy 7 Benign familial neonatal seizures 2 | Pathogenic(Last reviewed: Feb 21, 2020)                  | criteria provided, single submitter                  | VCV000007389 | 20               | 63442482       | 7389        | 22428       | rs74315392   | LOF        | 0.869    | 0.036        | 0.094    |
| KCNQ2 | 248 | F   | S   | NM_172107.4(KCNQ2):c.743T>C (p.Phe248Ser) | not provided                                                                                                                                    | Likely pathogenic(Last reviewed: Feb 10, 2016)           | criteria provided, single submitter                  | VCV000372909 | 20               | 63442479       | 372909      | 360484      | rs1057518068 | LOF        | 0.858    | 0.049        | 0.093    |
| KCNQ2 | 249 | L   | P   | NM_172107.4(KCNQ2):c.746T>C (p.Leu249Pro) | Intellectual disability                                                                                                                         | Likely pathogenic(Last reviewed: Dec 1, 2019)            | no assertion criteria provided                       | VCV000870318 | 20               | 63442476       | 870318      | 858396      | rs2081190512 | LOF        | 0.851    | 0.056        | 0.092    |
| KCNQ2 | 250 | V   | G   | NM_172107.4(KCNQ2):c.749T>G (p.Val250Gly) | Early infantile epileptic encephalopathy with suppression bursts Benign familial neonatal seizures 1                                            | Likely pathogenic(Last reviewed: Jan 8, 2020)            | criteria provided, single submitter                  | VCV000021800 | 20               | 63442473       | 21800       | 34652       | rs118192206  | LOF        | 0.832    | 0.076        | 0.092    |
| KCNQ2 | 250 | V   | L   | NM_172107.4(KCNQ2):c.748G>T (p.Val250Leu) | Early infantile epileptic encephalopathy with suppression bursts(not provided)                                                                  | Pathogenic(Last reviewed: Jul 29, 2020)                  | criteria provided, multiple submitters, no conflicts | VCV000872260 | 20               | 63442474       | 872260      | 860671      | rs2081190344 | LOF        | 0.837    | 0.036        | 0.127    |
| KCNQ2 | 252 | L   | F   | NM_172107.4(KCNQ2):c.756G>T (p.Leu252Phe) | Early infantile epileptic encephalopathy with suppression bursts                                                                                | Uncertain significance(Last reviewed: Feb 6, 2020)       | criteria provided, single submitter                  | VCV001001558 | 20               | 63442466       | 1001558     | 999088      | rs2081190032 | LOF        | 0.854    | 0.043        | 0.103    |
| KCNQ2 | 253 | A   | S   | NM_172107.4(KCNQ2):c.757G>T (p.Ala253Ser) | Early infantile epileptic encephalopathy 7                                                                                                      | Pathogenic(Last reviewed: Sep 29, 2020)                  | criteria provided, single submitter                  | VCV000975904 | 20               | 63442465       | 975904      | 964543      | rs1057516093 | LOF        | 0.829    | 0.088        | 0.084    |
| KCNQ2 | 253 | A   | T   | NM_172107.4(KCNQ2):c.757G>A (p.Ala253Thr) | Early infantile epileptic encephalopathy 7                                                                                                      | Pathogenic(Last reviewed: Mar 31, 2016)                  | no assertion criteria provided                       | VCV000369761 | 20               | 63442465       | 369761      | 354015      | rs1057516093 | LOF        | 0.843    | 0.075        | 0.083    |
| KCNQ2 | 254 | E   | D   | NM_172107.4(KCNQ2):c.762G>C (p.Glu254Asp) | Early infantile epileptic encephalopathy 7                                                                                                      | Likely pathogenic(Last reviewed: Sep 7, 2016)            | criteria provided, single submitter                  | VCV000976223 | 20               | 63442460       | 976223      | 964542      | rs2081189736 | LOF        | 0.816    | 0.069        | 0.115    |



| gene  | pos | aa1 | aa2 | Name                                      | Condition(s)                                                                                                | Clinical significance (Last reviewed)                                    | Review status                                        | Accession    | GRCh38Chromosome | GRCh38Location | VariationID | AlleleID(s) | dbSNP ID     | prediction | prob.LOF | prob.Neutral | prob.GOF |
|-------|-----|-----|-----|-------------------------------------------|-------------------------------------------------------------------------------------------------------------|--------------------------------------------------------------------------|------------------------------------------------------|--------------|------------------|----------------|-------------|-------------|--------------|------------|----------|--------------|----------|
| KCNQ2 | 254 | E   | G   | NM_172107.4(KCNQ2):c.761A>G (p.Glu254Gly) | not provided Early infantile epileptic encephalopathy with suppression bursts                               | Uncertain significance(Last reviewed: Dec 14, 2019)                      | criteria provided, multiple submitters, no conflicts | VCV000197889 | 20               | 63442461       | 197889      | 195050      | rs794727739  | LOF        | 0.823    | 0.083        | 0.094    |
| KCNQ2 | 255 | K   | R   | NM_172107.4(KCNQ2):c.764A>G (p.Lys255Arg) | not provided                                                                                                | Likely pathogenic(Last reviewed: Jun 19, 2017)                           | criteria provided, single submitter                  | VCV000432713 | 20               | 63442458       | 432713      | 426353      | rs1555871862 | LOF        | 0.868    | 0.035        | 0.098    |
| KCNQ2 | 256 | G   | R   | NM_172107.4(KCNQ2):c.766G>A (p.Gly256Arg) | Early infantile epileptic encephalopathy 7                                                                  | Likely pathogenic(Last reviewed: Dec 23, 2019)                           | criteria provided, single submitter                  | VCV000975979 | 20               | 63442456       | 975979      | 964541      | rs1057518500 | LOF        | 0.865    | 0.052        | 0.082    |
| KCNQ2 | 256 | G   | R   | NM_172107.4(KCNQ2):c.766G>A (p.Gly256Arg) | Early infantile epileptic encephalopathy 7                                                                  | Likely pathogenic(Last reviewed: Dec 23, 2019)                           | criteria provided, single submitter                  | VCV000975979 | 20               | 63442456       | 975979      | 964541      | rs1057518500 | LOF        | 0.865    | 0.052        | 0.082    |
| KCNQ2 | 256 | G   | R   | NM_172107.4(KCNQ2):c.766G>C (p.Gly256Arg) | not specified                                                                                               | Uncertain significance(Last reviewed: Nov 28, 2016)                      | criteria provided, single submitter                  | VCV000373592 | 20               | 63442456       | 373592      | 360589      | rs1057518500 | LOF        | 0.865    | 0.052        | 0.082    |
| KCNQ2 | 256 | G   | R   | NM_172107.4(KCNQ2):c.766G>C (p.Gly256Arg) | not specified                                                                                               | Uncertain significance(Last reviewed: Nov 28, 2016)                      | criteria provided, single submitter                  | VCV000373592 | 20               | 63442456       | 373592      | 360589      | rs1057518500 | LOF        | 0.865    | 0.052        | 0.082    |
| KCNQ2 | 256 | G   | V   | NM_172107.4(KCNQ2):c.767G>T (p.Gly256Val) | Early infantile epileptic encephalopathy with suppression bursts                                            | Uncertain significance(Last reviewed: Feb 21, 2020)                      | criteria provided, single submitter                  | VCV000945463 | 20               | 63442455       | 945463      | 929249      | rs1371722284 | LOF        | 0.871    | 0.048        | 0.081    |
| KCNQ2 | 258 | N   | K   | NM_172107.4(KCNQ2):c.774C>G (p.Asn258Lys) | Early infantile epileptic encephalopathy with suppression bursts                                            | Uncertain significance(Last reviewed: Feb 18, 2018)                      | criteria provided, single submitter                  | VCV000566350 | 20               | 63442448       | 566350      | 572968      | rs770187706  | LOF        | 0.875    | 0.039        | 0.086    |
| KCNQ2 | 258 | N   | S   | NM_172107.4(KCNQ2):c.773A>G (p.Asn258Ser) | Benign familial neonatal seizures 1                                                                         | Pathogenic(Last reviewed: Mar 31, 2016)                                  | no assertion criteria provided                       | VCV000021801 | 20               | 63442449       | 21801       | 34653       | rs118192207  | LOF        | 0.868    | 0.044        | 0.088    |
| KCNQ2 | 259 | D   | E   | NM_172107.4(KCNQ2):c.777C>A (p.Asp259Glu) | Early infantile epileptic encephalopathy with suppression bursts                                            | Uncertain significance(Last reviewed: Nov 20, 2019)                      | criteria provided, single submitter                  | VCV000852143 | 20               | 63442445       | 852143      | 848541      | rs2081188808 | LOF        | 0.818    | 0.084        | 0.098    |
| KCNQ2 | 259 | D   | G   | NM_172107.4(KCNQ2):c.776A>G (p.Asp259Gly) | not provided                                                                                                | Likely pathogenic(Last reviewed: Nov 28, 2016)                           | criteria provided, single submitter                  | VCV000373573 | 20               | 63442446       | 373573      | 360437      | rs1057518489 | LOF        | 0.816    | 0.087        | 0.097    |
| KCNQ2 | 259 | D   | N   | NM_172107.4(KCNQ2):c.775G>A (p.Asp259Asn) | Benign familial neonatal seizures 1 Early infantile epileptic encephalopathy with suppression bursts        | Conflicting interpretations of pathogenicity(Last reviewed: Oct 4, 2019) | criteria provided, conflicting interpretations       | VCV000692196 | 20               | 63442447       | 692196      | 679939      | rs777257591  | LOF        | 0.817    | 0.084        | 0.099    |
| KCNQ2 | 259 | D   | Y   | NM_172107.4(KCNQ2):c.775G>T (p.Asp259Tyr) | Benign familial neonatal seizures 1                                                                         | Pathogenic                                                               | no assertion criteria provided                       | VCV000219240 | 20               | 63442447       | 219240      | 217261      | rs777257591  | LOF        | 0.816    | 0.075        | 0.108    |
| KCNQ2 | 260 | H   | Y   | NM_172107.4(KCNQ2):c.778C>T (p.His260Tyr) | Early infantile epileptic encephalopathy 7                                                                  | Likely pathogenic(Last reviewed: Jan 1, 2018)                            | criteria provided, single submitter                  | VCV000495248 | 20               | 63442444       | 495248      | 486774      | rs1555871832 | LOF        | 0.872    | 0.04         | 0.088    |
| KCNQ2 | 261 | F   | C   | NM_172107.4(KCNQ2):c.782T>G (p.Phe261Cys) | Early infantile epileptic encephalopathy 7 Early infantile epileptic encephalopathy with suppression bursts | Likely pathogenic(Last reviewed: Jun 7, 2019)                            | criteria provided, multiple submitters, no conflicts | VCV000946410 | 20               | 63442440       | 946410      | 929248      | rs796052631  | LOF        | 0.87     | 0.042        | 0.088    |
| KCNQ2 | 261 | F   | S   | NM_172107.4(KCNQ2):c.782T>C               | Seizures not provided                                                                                       | Conflicting                                                              | criteria                                             | VCV000205879 | 20               | 63442440       | 205879      | 203781      | rs796052631  | LOF        | 0.883    | 0.044        | 0.073    |

| gene  | pos | aa1 | aa2 | Name                                      | Condition(s)                                                                                                                                                                                                                                                     | Clinical significance (Last reviewed)                          | Review status                                        | Accession    | GRCh38Chromosome | GRCh38Location | VariationID | AlleleID(s) | dbSNP ID     | prediction | prob.LOF | prob.Neutral | prob.GOF |
|-------|-----|-----|-----|-------------------------------------------|------------------------------------------------------------------------------------------------------------------------------------------------------------------------------------------------------------------------------------------------------------------|----------------------------------------------------------------|------------------------------------------------------|--------------|------------------|----------------|-------------|-------------|--------------|------------|----------|--------------|----------|
|       |     |     |     | (p.Phe261Ser)                             |                                                                                                                                                                                                                                                                  | interpretations of pathogenicity (Last reviewed: Jun 27, 2016) | provided, conflicting interpretations                |              |                  |                |             |             |              |            |          |              |          |
| KCNQ2 | 263 | T   | A   | NM_172107.4(KCNQ2):c.787A>G (p.Thr263Ala) | Epileptic encephalopathy, early infantile, 1                                                                                                                                                                                                                     | Likely pathogenic (Last reviewed: Jan 1, 2019)                 | no assertion criteria provided                       | VCV000975414 | 20               | 63442435       | 975414      | 963917      | rs2081188385 | LOF        | 0.853    | 0.059        | 0.088    |
| KCNQ2 | 263 | T   | I   | NM_172107.4(KCNQ2):c.788C>T (p.Thr263Ile) | Early infantile epileptic encephalopathy with suppression bursts                                                                                                                                                                                                 | Pathogenic (Last reviewed: May 8, 2019)                        | criteria provided, single submitter                  | VCV000571819 | 20               | 63442434       | 571819      | 573613      | rs1568932462 | LOF        | 0.848    | 0.056        | 0.096    |
| KCNQ2 | 264 | Y   | N   | NM_172107.4(KCNQ2):c.790T>A (p.Tyr264Asn) | not provided                                                                                                                                                                                                                                                     | Likely pathogenic (Last reviewed: Sep 27, 2015)                | criteria provided, single submitter                  | VCV000205880 | 20               | 63442432       | 205880      | 203780      | rs796052632  | LOF        | 0.854    | 0.048        | 0.098    |
| KCNQ2 | 265 | A   | P   | NM_172107.4(KCNQ2):c.793G>C (p.Ala265Pro) | Early infantile epileptic encephalopathy 7                                                                                                                                                                                                                       | Pathogenic (Last reviewed: Mar 31, 2016)                       | no assertion criteria provided                       | VCV000369762 | 20               | 63442429       | 369762      | 354014      | rs794727740  | LOF        | 0.837    | 0.086        | 0.077    |
| KCNQ2 | 265 | A   | T   | NM_172107.4(KCNQ2):c.793G>A (p.Ala265Thr) | Seizures Early infantile epileptic encephalopathy with suppression bursts not provided Early infantile epileptic encephalopathy 7                                                                                                                                | Pathogenic/Likely pathogenic (Last reviewed: Oct 23, 2020)     | criteria provided, multiple submitters, no conflicts | VCV000197891 | 20               | 63442429       | 197891      | 195052      | rs794727740  | LOF        | 0.85     | 0.069        | 0.082    |
| KCNQ2 | 265 | A   | V   | NM_172107.4(KCNQ2):c.794C>T (p.Ala265Val) | Intellectual disability Early infantile epileptic encephalopathy 7 Early infantile epileptic encephalopathy 7 Benign familial neonatal seizures 1 KCNQ2-Related Disorders Seizures Early infantile epileptic encephalopathy with suppression bursts not provided | Pathogenic/Likely pathogenic (Last reviewed: Aug 1, 2020)      | criteria provided, multiple submitters, no conflicts | VCV000120176 | 20               | 63442428       | 120176      | 125784      | rs587777219  | LOF        | 0.873    | 0.05         | 0.076    |
| KCNQ2 | 266 | D   | E   | NM_172107.4(KCNQ2):c.798T>A (p.Asp266Glu) | Epileptic encephalopathy                                                                                                                                                                                                                                         | Pathogenic (Last reviewed: Nov 16, 2016)                       | criteria provided, single submitter                  | VCV000375518 | 20               | 63442424       | 375518      | 362349      | rs1057519536 | LOF        | 0.835    | 0.056        | 0.109    |
| KCNQ2 | 266 | D   | G   | NM_172107.4(KCNQ2):c.797A>G (p.Asp266Gly) | Early infantile epileptic encephalopathy with suppression bursts                                                                                                                                                                                                 | Likely pathogenic (Last reviewed: Sep 1, 2020)                 | criteria provided, single submitter                  | VCV000852899 | 20               | 63442425       | 852899      | 848540      | rs2081187692 | LOF        | 0.824    | 0.087        | 0.089    |
| KCNQ2 | 267 | A   | T   | NM_172107.4(KCNQ2):c.799G>A (p.Ala267Thr) | not provided                                                                                                                                                                                                                                                     | Likely pathogenic (Last reviewed: May 2, 2019)                 | criteria provided, single submitter                  | VCV001210663 | 20               | 63442423       | 1210663     | 1200662     | NA           | LOF        | 0.827    | 0.084        | 0.089    |
| KCNQ2 | 267 | A   | V   | NM_172107.4(KCNQ2):c.800C>T (p.Ala267Val) | Early infantile epileptic encephalopathy with suppression bursts                                                                                                                                                                                                 | Uncertain significance (Last reviewed: Jul 9, 2019)            | criteria provided, single submitter                  | VCV000951223 | 20               | 63442422       | 951223      | 929247      | rs2081187554 | LOF        | 0.861    | 0.059        | 0.079    |
| KCNQ2 | 268 | L   | F   | NM_172107.4(KCNQ2):c.802C>T (p.Leu268Phe) | Epileptic encephalopathy not provided Early infantile epileptic encephalopathy 7                                                                                                                                                                                 | Likely pathogenic (Last reviewed: Dec 1, 2021)                 | criteria provided, multiple submitters, no conflicts | VCV000369763 | 20               | 63442420       | 369763      | 354013      | rs1057516094 | LOF        | 0.866    | 0.042        | 0.093    |
| KCNQ2 | 268 | L   | P   | NM_172107.4(KCNQ2):c.803T>C (p.Leu268Pro) | Early infantile epileptic encephalopathy 7                                                                                                                                                                                                                       | Pathogenic                                                     | no assertion criteria provided                       | VCV000219236 | 20               | 63442419       | 219236      | 217260      | rs864321708  | LOF        | 0.86     | 0.063        | 0.078    |
| KCNQ2 | 269 | W   | L   | NM_172107.4(KCNQ2):c.806G>T (p.Trp269Leu) | not provided                                                                                                                                                                                                                                                     | Likely pathogenic (Last reviewed: Jan 9, 2013)                 | criteria provided, single submitter                  | VCV000205881 | 20               | 63442416       | 205881      | 203778      | rs796052633  | LOF        | 0.879    | 0.036        | 0.085    |
| KCNQ2 | 269 | W   | S   | NM_172107.4(KCNQ2):c.806G>C (p.Trp269Ser) | Early infantile epileptic encephalopathy 7                                                                                                                                                                                                                       | Likely pathogenic (Last reviewed: Mar 29, 2021)                | criteria provided, single submitter                  | VCV001285561 | 20               | 63442416       | 1285561     | 1275404     | NA           | LOF        | 0.879    | 0.045        | 0.076    |
| KCNQ2 | 270 | W   | C   | NM_172107.4(KCNQ2):c.810G>T (p.Trp270Cys) | Early infantile epileptic encephalopathy with suppression bursts                                                                                                                                                                                                 | Uncertain significance (Last reviewed: Dec 27,                 | criteria provided, single submitter                  | VCV000851253 | 20               | 63442412       | 851253      | 848539      | rs2081187047 | LOF        | 0.87     | 0.041        | 0.089    |

| gene  | pos | aa1 | aa2 | Name                                      | Condition(s)                                                                                                             | Clinical significance (Last reviewed)                    | Review status                                        | Accession    | GRCh38Chromosome | GRCh38Location | VariationID | AlleleID(s) | dbSNP ID     | prediction | prob.LOF | prob.Neutral | prob.GOF |
|-------|-----|-----|-----|-------------------------------------------|--------------------------------------------------------------------------------------------------------------------------|----------------------------------------------------------|------------------------------------------------------|--------------|------------------|----------------|-------------|-------------|--------------|------------|----------|--------------|----------|
|       |     |     |     |                                           |                                                                                                                          | 2019)                                                    |                                                      |              |                  |                |             |             |              |            |          |              |          |
| KCNQ2 | 271 | G   | D   | NM_172107.4(KCNQ2):c.812G>A (p.Gly271Asp) | Early infantile epileptic encephalopathy with suppression bursts                                                         | Uncertain significance(Last reviewed: Jun 22, 2018)      | criteria provided, single submitter                  | VCV000565381 | 20               | 63442410       | 565381      | 573608      | rs118192209  | LOF        | 0.834    | 0.077        | 0.089    |
| KCNQ2 | 271 | G   | R   | NM_172107.4(KCNQ2):c.811G>C (p.Gly271Arg) | not provided                                                                                                             | Likely pathogenic(Last reviewed: Oct 1, 2016)            | criteria provided, single submitter                  | VCV000425271 | 20               | 63442411       | 425271      | 413605      | rs1064797284 | LOF        | 0.868    | 0.047        | 0.084    |
| KCNQ2 | 271 | G   | V   | NM_172107.4(KCNQ2):c.812G>T (p.Gly271Val) | Benign familial neonatal seizures 1                                                                                      | Pathogenic(Last reviewed: Mar 31, 2016)                  | no assertion criteria provided                       | VCV000021803 | 20               | 63442410       | 21803       | 34655       | rs118192209  | LOF        | 0.881    | 0.045        | 0.074    |
| KCNQ2 | 272 | L   | P   | NM_172107.4(KCNQ2):c.815T>C (p.Leu272Pro) | not provided                                                                                                             | Uncertain significance(Last reviewed: Jul 1, 2016)       | criteria provided, single submitter                  | VCV000374744 | 20               | 63442407       | 374744      | 361630      | rs1057519227 | LOF        | 0.861    | 0.063        | 0.076    |
| KCNQ2 | 273 | I   | M   | NM_172107.4(KCNQ2):c.819C>G (p.Ile273Met) | not provided                                                                                                             | Likely pathogenic(Last reviewed: Oct 20, 2016)           | criteria provided, single submitter                  | VCV000422481 | 20               | 63439706       | 422481      | 410828      | rs771282785  | LOF        | 0.86     | 0.04         | 0.1      |
| KCNQ2 | 273 | I   | N   | NM_172107.4(KCNQ2):c.818T>A (p.Ile273Asn) | not provided                                                                                                             | Likely pathogenic(Last reviewed: Jun 17, 2013)           | criteria provided, single submitter                  | VCV000205883 | 20               | 63439707       | 205883      | 203776      | rs796052635  | LOF        | 0.859    | 0.057        | 0.084    |
| KCNQ2 | 274 | T   | M   | NM_172107.4(KCNQ2):c.821C>T (p.Thr274Met) | Early infantile epileptic encephalopathy 7(not provided)Early infantile epileptic encephalopathy with suppression bursts | Pathogenic(Last reviewed: Jan 3, 2022)                   | criteria provided, multiple submitters, no conflicts | VCV000167208 | 20               | 63439704       | 167208      | 177432      | rs727503974  | LOF        | 0.853    | 0.043        | 0.103    |
| KCNQ2 | 275 | L   | V   | NM_172107.4(KCNQ2):c.823C>G (p.Leu275Val) | not provided                                                                                                             | Likely pathogenic(Last reviewed: Jul 17, 2019)           | criteria provided, single submitter                  | VCV001177922 | 20               | 63439702       | 1177922     | 1167758     | NA           | LOF        | 0.865    | 0.044        | 0.091    |
| KCNQ2 | 276 | T   | I   | NM_172107.4(KCNQ2):c.827C>T (p.Thr276Ile) | not provided Early infantile epileptic encephalopathy 7                                                                  | Pathogenic(Last reviewed: Sep 8, 2020)                   | criteria provided, single submitter                  | VCV000369764 | 20               | 63439698       | 369764      | 354012      | rs1057516095 | LOF        | 0.881    | 0.039        | 0.08     |
| KCNQ2 | 276 | T   | N   | NM_172107.4(KCNQ2):c.827C>A (p.Thr276Asn) | Early infantile epileptic encephalopathy with suppression bursts                                                         | Pathogenic(Last reviewed: Nov 11, 2019)                  | criteria provided, single submitter                  | VCV000941582 | 20               | 63439698       | 941582      | 939031      | rs1057516095 | LOF        | 0.863    | 0.058        | 0.079    |
| KCNQ2 | 277 | T   | N   | NM_172107.4(KCNQ2):c.830C>A (p.Thr277Asn) | Early infantile epileptic encephalopathy with suppression bursts                                                         | Uncertain significance(Last reviewed: Dec 11, 2018)      | criteria provided, single submitter                  | VCV000665007 | 20               | 63439695       | 665007      | 650413      | rs1600755607 | LOF        | 0.868    | 0.047        | 0.085    |
| KCNQ2 | 277 | T   | P   | NM_172107.4(KCNQ2):c.829A>C (p.Thr277Pro) | Early infantile epileptic encephalopathy with suppression bursts                                                         | Uncertain significance(Last reviewed: Jul 11, 2019)      | criteria provided, single submitter                  | VCV000643905 | 20               | 63439696       | 643905      | 650412      | rs1555870554 | LOF        | 0.869    | 0.05         | 0.08     |
| KCNQ2 | 277 | T   | S   | NM_172107.4(KCNQ2):c.829A>T (p.Thr277Ser) | Early infantile epileptic encephalopathy with suppression bursts Early infantile epileptic encephalopathy 7              | Likely pathogenic(Last reviewed: Aug 24, 2020)           | criteria provided, multiple submitters, no conflicts | VCV000495250 | 20               | 63439696       | 495250      | 486773      | rs1555870554 | LOF        | 0.868    | 0.047        | 0.086    |
| KCNQ2 | 278 | I   | N   | NM_172107.4(KCNQ2):c.833T>A (p.Ile278Asn) | not provided                                                                                                             | Likely pathogenic(Last reviewed: Oct 20, 2016)           | criteria provided, single submitter                  | VCV000390326 | 20               | 63439692       | 390326      | 379751      | rs1057523728 | LOF        | 0.872    | 0.05         | 0.079    |
| KCNQ2 | 278 | I   | T   | NM_172107.4(KCNQ2):c.833T>C (p.Ile278Thr) | not provided Early infantile epileptic encephalopathy 7                                                                  | Pathogenic/Likely pathogenic(Last reviewed: Dec 2, 2021) | criteria provided, multiple submitters, no conflicts | VCV000429212 | 20               | 63439692       | 429212      | 422344      | rs1057523728 | LOF        | 0.87     | 0.045        | 0.084    |

| gene  | pos | aa1 | aa2 | Name                                      | Condition(s)                                                                                                              | Clinical significance (Last reviewed)                                     | Review status                                        | Accession    | GRCh38Chromosome | GRCh38Location | VariationID | AlleleID(s) | dbSNP ID     | prediction | prob.LOF | prob.Neutral | prob.GOF |
|-------|-----|-----|-----|-------------------------------------------|---------------------------------------------------------------------------------------------------------------------------|---------------------------------------------------------------------------|------------------------------------------------------|--------------|------------------|----------------|-------------|-------------|--------------|------------|----------|--------------|----------|
| KCNQ2 | 279 | G   | C   | NM_172107.4(KCNQ2):c.835G>T (p.Gly279Cys) | Early infantile epileptic encephalopathy 7                                                                                | Pathogenic(Last reviewed: Mar 31, 2016)                                   | no assertion criteria provided                       | VCV000369765 | 20               | 63439690       | 369765      | 354011      | rs1057516096 | LOF        | 0.864    | 0.05         | 0.086    |
| KCNQ2 | 280 | Y   | C   | NM_172107.4(KCNQ2):c.839A>G (p.Tyr280Cys) | Seizures                                                                                                                  | Likely pathogenic(Last reviewed: Oct 12, 2016)                            | criteria provided, single submitter                  | VCV000589856 | 20               | 63439686       | 589856      | 580436      | rs1568927820 | LOF        | 0.86     | 0.05         | 0.09     |
| KCNQ2 | 280 | Y   | H   | NM_172107.4(KCNQ2):c.838T>C (p.Tyr280His) | Early infantile epileptic encephalopathy 7                                                                                | Pathogenic(Last reviewed: Sep 25, 2020)                                   | no assertion criteria provided                       | VCV000982412 | 20               | 63439687       | 982412      | 970531      | rs2081102604 | LOF        | 0.874    | 0.045        | 0.081    |
| KCNQ2 | 281 | G   | E   | NM_172107.4(KCNQ2):c.842G>A (p.Gly281Glu) | not provided                                                                                                              | Likely pathogenic(Last reviewed: Aug 11, 2016)                            | criteria provided, single submitter                  | VCV000421991 | 20               | 63439683       | 421991      | 410827      | rs1064795489 | LOF        | 0.863    | 0.049        | 0.088    |
| KCNQ2 | 281 | G   | R   | NM_172107.4(KCNQ2):c.841G>C (p.Gly281Arg) | Early infantile epileptic encephalopathy 7                                                                                | Likely pathogenic(Last reviewed: Nov 8, 2017)                             | criteria provided, single submitter                  | VCV000488538 | 20               | 63439684       | 488538      | 481406      | rs794727813  | LOF        | 0.857    | 0.046        | 0.097    |
| KCNQ2 | 281 | G   | R   | NM_172107.4(KCNQ2):c.841G>C (p.Gly281Arg) | Early infantile epileptic encephalopathy 7                                                                                | Likely pathogenic(Last reviewed: Nov 8, 2017)                             | criteria provided, single submitter                  | VCV000488538 | 20               | 63439684       | 488538      | 481406      | rs794727813  | LOF        | 0.857    | 0.046        | 0.097    |
| KCNQ2 | 281 | G   | R   | NM_172107.4(KCNQ2):c.841G>A (p.Gly281Arg) | Early infantile epileptic encephalopathy with suppression bursts(not provided) Early infantile epileptic encephalopathy 7 | Conflicting interpretations of pathogenicity(Last reviewed: Aug 2, 2020)  | criteria provided, conflicting interpretations       | VCV000198284 | 20               | 63439684       | 198284      | 195445      | rs794727813  | LOF        | 0.857    | 0.046        | 0.097    |
| KCNQ2 | 281 | G   | R   | NM_172107.4(KCNQ2):c.841G>A (p.Gly281Arg) | Early infantile epileptic encephalopathy with suppression bursts(not provided) Early infantile epileptic encephalopathy 7 | Conflicting interpretations of pathogenicity(Last reviewed: Aug 2, 2020)  | criteria provided, conflicting interpretations       | VCV000198284 | 20               | 63439684       | 198284      | 195445      | rs794727813  | LOF        | 0.857    | 0.046        | 0.097    |
| KCNQ2 | 281 | G   | W   | NM_172107.4(KCNQ2):c.841G>T (p.Gly281Trp) | not provided Early infantile epileptic encephalopathy 7                                                                   | Pathogenic(Last reviewed: Oct 3, 2017)                                    | criteria provided, multiple submitters, no conflicts | VCV000216949 | 20               | 63439684       | 216949      | 213659      | rs794727813  | LOF        | 0.863    | 0.052        | 0.086    |
| KCNQ2 | 282 | D   | H   | NM_172107.4(KCNQ2):c.844G>C (p.Asp282His) | Early infantile epileptic encephalopathy with suppression bursts(not provided)                                            | Conflicting interpretations of pathogenicity(Last reviewed: Aug 31, 2020) | criteria provided, conflicting interpretations       | VCV000430396 | 20               | 63439681       | 430396      | 422343      | rs796052636  | LOF        | 0.878    | 0.044        | 0.078    |
| KCNQ2 | 282 | D   | N   | NM_172107.4(KCNQ2):c.844G>A (p.Asp282Asn) | Early infantile epileptic encephalopathy with suppression bursts(not provided)                                            | Pathogenic/Likely pathogenic(Last reviewed: Jan 29, 2020)                 | criteria provided, multiple submitters, no conflicts | VCV000205884 | 20               | 63439681       | 205884      | 203775      | rs796052636  | LOF        | 0.873    | 0.049        | 0.079    |
| KCNQ2 | 282 | D   | V   | NM_172107.4(KCNQ2):c.845A>T (p.Asp282Val) | Epileptic encephalopathy                                                                                                  | Pathogenic                                                                | no assertion criteria provided                       | VCV000812789 | 20               | 63439680       | 812789      | 801202      | rs1600755440 | LOF        | 0.879    | 0.043        | 0.077    |
| KCNQ2 | 283 | K   | E   | NM_172107.4(KCNQ2):c.847A>G (p.Lys283Glu) | Early infantile epileptic encephalopathy with suppression bursts                                                          | Likely pathogenic(Last reviewed: Feb 7, 2019)                             | criteria provided, single submitter                  | VCV000648864 | 20               | 63439678       | 648864      | 650414      | rs1600755429 | LOF        | 0.872    | 0.038        | 0.089    |
| KCNQ2 | 283 | K   | R   | NM_172107.4(KCNQ2):c.848A>G (p.Lys283Arg) | not provided                                                                                                              | Pathogenic(Last reviewed: May 20, 2021)                                   | criteria provided, single submitter                  | VCV000205885 | 20               | 63439677       | 205885      | 203774      | rs796052637  | LOF        | 0.88     | 0.035        | 0.085    |
| KCNQ2 | 284 | Y   | C   | NM_172107.4(KCNQ2):c.851A>G (p.Tyr284Cys) | Benign familial neonatal seizures 1                                                                                       | Pathogenic(Last reviewed: Mar 31, 2016)                                   | no assertion criteria provided                       | VCV000007381 | 20               | 63439674       | 7381        | 22420       | rs28939683   | LOF        | 0.863    | 0.04         | 0.098    |
| KCNQ2 | 284 | Y   | D   | NM_172107.4(KCNQ2):c.850T>G (p.Tyr284Asp) | Early infantile epileptic encephalopathy 7                                                                                | Pathogenic                                                                | no assertion criteria provided                       | VCV000219234 | 20               | 63439675       | 219234      | 217259      | rs864321706  | LOF        | 0.876    | 0.043        | 0.081    |

| gene  | pos | aa1 | aa2 | Name                                      | Condition(s)                                                                                                             | Clinical significance (Last reviewed)               | Review status                                        | Accession    | GRCh38Chromosome | GRCh38Location | VariationID | AlleleID(s) | dbSNP ID     | prediction | prob.LOF | prob.Neutral | prob.GOF |
|-------|-----|-----|-----|-------------------------------------------|--------------------------------------------------------------------------------------------------------------------------|-----------------------------------------------------|------------------------------------------------------|--------------|------------------|----------------|-------------|-------------|--------------|------------|----------|--------------|----------|
| KCNQ2 | 285 | P   | H   | NM_172107.4(KCNQ2):c.854C>A (p.Pro285His) | Early infantile epileptic encephalopathy 7                                                                               | Pathogenic(Last reviewed: Mar 31, 2016)             | no assertion criteria provided                       | VCV000369766 | 20               | 63439671       | 369766      | 354010      | rs1057516097 | LOF        | 0.883    | 0.041        | 0.076    |
| KCNQ2 | 285 | P   | L   | NM_172107.4(KCNQ2):c.854C>T (p.Pro285Leu) | not provided                                                                                                             | Likely pathogenic(Last reviewed: Sep 1, 2019)       | criteria provided, single submitter                  | VCV000871424 | 20               | 63439671       | 871424      | 860670      | rs1057516097 | LOF        | 0.894    | 0.034        | 0.072    |
| KCNQ2 | 285 | P   | S   | NM_172107.4(KCNQ2):c.853C>T (p.Pro285Ser) | Early infantile epileptic encephalopathy 7                                                                               | Likely pathogenic(Last reviewed: Jan 11, 2019)      | criteria provided, single submitter                  | VCV000975869 | 20               | 63439672       | 975869      | 964540      | rs2081101244 | LOF        | 0.879    | 0.046        | 0.075    |
| KCNQ2 | 287 | T   | I   | NM_172107.4(KCNQ2):c.860C>T (p.Thr287Ile) | not provided                                                                                                             | Uncertain significance(Last reviewed: Apr 7, 2014)  | criteria provided, single submitter                  | VCV000167207 | 20               | 63439665       | 167207      | 177168      | rs727503973  | LOF        | 0.85     | 0.055        | 0.095    |
| KCNQ2 | 287 | T   | N   | NM_172107.4(KCNQ2):c.860C>A (p.Thr287Asn) | Early infantile epileptic encephalopathy 7                                                                               | Pathogenic(Last reviewed: Mar 31, 2016)             | no assertion criteria provided                       | VCV000369767 | 20               | 63439665       | 369767      | 354009      | rs727503973  | LOF        | 0.853    | 0.065        | 0.082    |
| KCNQ2 | 288 | W   | C   | NM_172107.4(KCNQ2):c.864G>C (p.Trp288Cys) | Early infantile epileptic encephalopathy with suppression bursts                                                         | Uncertain significance(Last reviewed: May 2, 2019)  | criteria provided, single submitter                  | VCV000838229 | 20               | 63439661       | 838229      | 848538      | rs2081100544 | LOF        | 0.865    | 0.044        | 0.091    |
| KCNQ2 | 290 | G   | D   | NM_172107.4(KCNQ2):c.869G>A (p.Gly290Asp) | Benign familial neonatal seizures 1 Early infantile epileptic encephalopathy 7 not provided                              | Pathogenic(Last reviewed: Oct 11, 2018)             | criteria provided, single submitter                  | VCV000039762 | 20               | 63439656       | 39762       | 48361       | rs397514582  | LOF        | 0.826    | 0.083        | 0.091    |
| KCNQ2 | 290 | G   | S   | NM_172107.4(KCNQ2):c.868G>A (p.Gly290Ser) | not provided Early infantile epileptic encephalopathy with suppression bursts Early infantile epileptic encephalopathy 7 | Pathogenic(Last reviewed: Oct 2, 2021)              | criteria provided, multiple submitters, no conflicts | VCV000369768 | 20               | 63439657       | 369768      | 354008      | rs1057516098 | LOF        | 0.833    | 0.081        | 0.086    |
| KCNQ2 | 290 | G   | V   | NM_172107.4(KCNQ2):c.869G>T (p.Gly290Val) | Generalized hypotonia Seizures                                                                                           | Pathogenic(Last reviewed: Jan 1, 2017)              | criteria provided, single submitter                  | VCV000523563 | 20               | 63439656       | 523563      | 514107      | rs397514582  | LOF        | 0.879    | 0.048        | 0.073    |
| KCNQ2 | 291 | R   | S   | NM_172107.4(KCNQ2):c.873G>C (p.Arg291Ser) | Seizures                                                                                                                 | Uncertain significance(Last reviewed: Apr 20, 2016) | criteria provided, single submitter                  | VCV000587825 | 20               | 63439652       | 587825      | 580433      | rs1057519535 | LOF        | 0.808    | 0.047        | 0.145    |
| KCNQ2 | 291 | R   | S   | NM_172107.4(KCNQ2):c.873G>C (p.Arg291Ser) | Seizures                                                                                                                 | Uncertain significance(Last reviewed: Apr 20, 2016) | criteria provided, single submitter                  | VCV000587825 | 20               | 63439652       | 587825      | 580433      | rs1057519535 | LOF        | 0.808    | 0.047        | 0.145    |
| KCNQ2 | 291 | R   | S   | NM_172107.4(KCNQ2):c.873G>T (p.Arg291Ser) | Epileptic encephalopathy                                                                                                 | Likely pathogenic(Last reviewed: Nov 16, 2016)      | criteria provided, single submitter                  | VCV000375517 | 20               | 63439652       | 375517      | 362348      | rs1057519535 | LOF        | 0.808    | 0.047        | 0.145    |
| KCNQ2 | 291 | R   | S   | NM_172107.4(KCNQ2):c.873G>T (p.Arg291Ser) | Epileptic encephalopathy                                                                                                 | Likely pathogenic(Last reviewed: Nov 16, 2016)      | criteria provided, single submitter                  | VCV000375517 | 20               | 63439652       | 375517      | 362348      | rs1057519535 | LOF        | 0.808    | 0.047        | 0.145    |
| KCNQ2 | 292 | L   | P   | NM_172107.4(KCNQ2):c.875T>C (p.Leu292Pro) | Early infantile epileptic encephalopathy 7 Early infantile epileptic encephalopathy with suppression bursts              | Likely pathogenic(Last reviewed: Jun 7, 2019)       | criteria provided, multiple submitters, no conflicts | VCV000405208 | 20               | 63439650       | 405208      | 404202      | rs1060500602 | LOF        | 0.835    | 0.083        | 0.082    |
| KCNQ2 | 293 | L   | F   | NM_172107.4(KCNQ2):c.877C>T (p.Leu293Phe) | Early infantile epileptic encephalopathy with suppression bursts                                                         | Uncertain significance(Last reviewed: Jun 7, 2019)  | criteria provided, single submitter                  | VCV000948377 | 20               | 63439648       | 948377      | 929246      | rs2081099943 | LOF        | 0.838    | 0.057        | 0.105    |
| KCNQ2 | 293 | L   | P   | NM_172107.4(KCNQ2):c.878T>C (p.Leu293Pro) | Early infantile epileptic encephalopathy 7                                                                               | Pathogenic(Last reviewed: May 13, 2021)             | no assertion criteria provided                       | VCV001164059 | 20               | 63439647       | 1164059     | 1153056     | NA           | LOF        | 0.824    | 0.092        | 0.084    |

| gene  | pos | aa1 | aa2 | Name                                      | Condition(s)                                                                                                                                                                | Clinical significance (Last reviewed)                                     | Review status                                        | Accession    | GRCh38Chromosome | GRCh38Location | VariationID | AlleleID(s) | dbSNP ID     | prediction | prob.LOF | prob.Neutral | prob.GOF |
|-------|-----|-----|-----|-------------------------------------------|-----------------------------------------------------------------------------------------------------------------------------------------------------------------------------|---------------------------------------------------------------------------|------------------------------------------------------|--------------|------------------|----------------|-------------|-------------|--------------|------------|----------|--------------|----------|
| KCNQ2 | 294 | A   | G   | NM_172107.4(KCNQ2):c.881C>G (p.Ala294Gly) | Benign familial neonatal seizures 1                                                                                                                                         | Pathogenic(Last reviewed: Mar 31, 2016)                                   | no assertion criteria provided                       | VCV000021805 | 20               | 63439644       | 21805       | 34657       | rs118192211  | Neutral    | 0.651    | 0.26         | 0.089    |
| KCNQ2 | 294 | A   | S   | NM_172107.4(KCNQ2):c.880G>T (p.Ala294Ser) | Early infantile epileptic encephalopathy with suppression bursts                                                                                                            | Uncertain significance(Last reviewed: Feb 10, 2020)                       | criteria provided, single submitter                  | VCV001002473 | 20               | 63439645       | 1002473     | 999087      | rs2081099858 | Neutral    | 0.724    | 0.178        | 0.098    |
| KCNQ2 | 294 | A   | V   | NM_172107.4(KCNQ2):c.881C>T (p.Ala294Val) | Early infantile epileptic encephalopathy 7  Epileptic encephalopathy Early infantile epileptic encephalopathy with suppression bursts  KCNQ2-Related Disorders not provided | Pathogenic(Last reviewed: Dec 20, 2019)                                   | criteria provided, multiple submitters, no conflicts | VCV000205886 | 20               | 63439644       | 205886      | 203772      | NA           | LOF        | 0.815    | 0.095        | 0.09     |
| KCNQ2 | 296 | T   | N   | NM_172107.4(KCNQ2):c.887C>A (p.Thr296Asn) | Early infantile epileptic encephalopathy with suppression bursts                                                                                                            | Uncertain significance(Last reviewed: Jun 6, 2019)                        | criteria provided, single submitter                  | VCV000940822 | 20               | 63439638       | 940822      | 939030      | rs2081099327 | LOF        | 0.837    | 0.073        | 0.091    |
| KCNQ2 | 296 | T   | P   | NM_172107.4(KCNQ2):c.886A>C (p.Thr296Pro) | Early infantile epileptic encephalopathy 7                                                                                                                                  | Pathogenic(Last reviewed: Mar 31, 2016)                                   | no assertion criteria provided                       | VCV000369769 | 20               | 63439639       | 369769      | 354007      | rs756921902  | LOF        | 0.837    | 0.075        | 0.088    |
| KCNQ2 | 301 | G   | D   | NM_172107.4(KCNQ2):c.902G>A (p.Gly301Asp) | Seizures Early infantile epileptic encephalopathy 7 Benign familial neonatal seizures 1 Early infantile epileptic encephalopathy 7                                          | Pathogenic(Last reviewed: Aug 1, 2017)                                    | criteria provided, multiple submitters, no conflicts | VCV000431095 | 20               | 63439623       | 431095      | 424618      | rs1131691936 | LOF        | 0.831    | 0.085        | 0.084    |
| KCNQ2 | 301 | G   | S   | NM_172107.4(KCNQ2):c.901G>A (p.Gly301Ser) | Epileptic encephalopathy not provided Early infantile epileptic encephalopathy 7 Early infantile epileptic encephalopathy with suppression bursts                           | Conflicting interpretations of pathogenicity(Last reviewed: Oct 2, 2021)  | criteria provided, conflicting interpretations       | VCV000369770 | 20               | 63439624       | 369770      | 354006      | rs1057516099 | LOF        | 0.832    | 0.083        | 0.085    |
| KCNQ2 | 301 | G   | V   | NM_172107.4(KCNQ2):c.902G>T (p.Gly301Val) | Early infantile epileptic encephalopathy with suppression bursts not provided                                                                                               | Conflicting interpretations of pathogenicity(Last reviewed: Feb 21, 2020) | criteria provided, conflicting interpretations       | VCV000430386 | 20               | 63439623       | 430386      | 422342      | rs1131691936 | LOF        | 0.869    | 0.048        | 0.083    |
| KCNQ2 | 303 | S   | C   | NM_172107.4(KCNQ2):c.908C>G (p.Ser303Cys) | Early infantile epileptic encephalopathy with suppression bursts                                                                                                            | Uncertain significance(Last reviewed: Oct 28, 2020)                       | criteria provided, single submitter                  | VCV000942443 | 20               | 63439617       | 942443      | 939029      | rs2081098548 | LOF        | 0.85     | 0.053        | 0.096    |
| KCNQ2 | 304 | F   | C   | NM_172107.4(KCNQ2):c.911T>G (p.Phe304Cys) | Early infantile epileptic encephalopathy with suppression bursts                                                                                                            | Uncertain significance(Last reviewed: Mar 26, 2020)                       | criteria provided, single submitter                  | VCV001060320 | 20               | 63439614       | 1060320     | 1051781     | NA           | LOF        | 0.841    | 0.053        | 0.106    |
| KCNQ2 | 304 | F   | S   | NM_172107.4(KCNQ2):c.911T>C (p.Phe304Ser) | not provided Early infantile epileptic encephalopathy 7                                                                                                                     | Pathogenic(Last reviewed: Sep 9, 2019)                                    | criteria provided, single submitter                  | VCV000369771 | 20               | 63439614       | 369771      | 354005      | rs1057516100 | LOF        | 0.852    | 0.058        | 0.089    |
| KCNQ2 | 305 | F   | L   | NM_172107.4(KCNQ2):c.915C>G (p.Phe305Leu) | Early infantile epileptic encephalopathy with suppression bursts                                                                                                            | Pathogenic(Last reviewed: Mar 7, 2020)                                    | criteria provided, single submitter                  | VCV000461423 | 20               | 63439610       | 461423      | 470995      | rs775918190  | LOF        | 0.826    | 0.041        | 0.133    |
| KCNQ2 | 305 | F   | L   | NM_172107.4(KCNQ2):c.915C>G (p.Phe305Leu) | Early infantile epileptic encephalopathy with suppression bursts                                                                                                            | Pathogenic(Last reviewed: Mar 7, 2020)                                    | criteria provided, single submitter                  | VCV000461423 | 20               | 63439610       | 461423      | 470995      | rs775918190  | LOF        | 0.826    | 0.041        | 0.133    |
| KCNQ2 | 305 | F   | L   | NM_172107.4(KCNQ2):c.915C>A (p.Phe305Leu) | Early infantile epileptic encephalopathy 7 Early infantile epileptic encephalopathy with suppression bursts not provided                                                    | Pathogenic/Likely pathogenic(Last reviewed: Mar 18, 2019)                 | criteria provided, multiple submitters, no conflicts | VCV000205887 | 20               | 63439610       | 205887      | 203771      | rs775918190  | LOF        | 0.826    | 0.041        | 0.133    |
| KCNQ2 | 305 | F   | L   | NM_172107.4(KCNQ2):c.915C>A (p.Phe305Leu) | Early infantile epileptic encephalopathy 7 Early infantile epileptic encephalopathy with suppression bursts not provided                                                    | Pathogenic/Likely pathogenic(Last reviewed: Mar 18, 2019)                 | criteria provided, multiple submitters, no conflicts | VCV000205887 | 20               | 63439610       | 205887      | 203771      | rs775918190  | LOF        | 0.826    | 0.041        | 0.133    |

| gene  | pos | aa1 | aa2 | Name                                      | Condition(s)                                                                                                                                                                                            | Clinical significance (Last reviewed)                                    | Review status                                        | Accession    | GRCh38Chromosome | GRCh38Location | VariationID | AlleleID(s) | dbSNP ID     | prediction | prob.LOF | prob.Neutral | prob.GOF |
|-------|-----|-----|-----|-------------------------------------------|---------------------------------------------------------------------------------------------------------------------------------------------------------------------------------------------------------|--------------------------------------------------------------------------|------------------------------------------------------|--------------|------------------|----------------|-------------|-------------|--------------|------------|----------|--------------|----------|
| KCNQ2 | 306 | A   | E   | NM_172107.4(KCNQ2):c.917C>A (p.Ala306Glu) | Early infantile epileptic encephalopathy with suppression bursts                                                                                                                                        | Likely pathogenic(Last reviewed: Oct 5, 2020)                            | criteria provided, single submitter                  | VCV001066055 | 20               | 63439608       | 1066055     | 1056622     | NA           | LOF        | 0.817    | 0.087        | 0.096    |
| KCNQ2 | 306 | A   | P   | NM_172107.4(KCNQ2):c.916G>C (p.Ala306Pro) | not provided                                                                                                                                                                                            | Pathogenic(Last reviewed: Sep 2, 2020)                                   | criteria provided, single submitter                  | VCV000205888 | 20               | 63439609       | 205888      | 203770      | rs74315390   | LOF        | 0.796    | 0.116        | 0.088    |
| KCNQ2 | 306 | A   | T   | NM_172107.4(KCNQ2):c.916G>A (p.Ala306Thr) | Early infantile epileptic encephalopathy with suppression bursts Benign familial neonatal seizures 1 Seizures not provided                                                                              | Pathogenic(Last reviewed: Oct 26, 2020)                                  | criteria provided, multiple submitters, no conflicts | VCV000007382 | 20               | 63439609       | 7382        | 22421       | rs74315390   | LOF        | 0.813    | 0.09         | 0.097    |
| KCNQ2 | 306 | A   | V   | NM_172107.4(KCNQ2):c.917C>T (p.Ala306Val) | Early infantile epileptic encephalopathy with suppression bursts not provided Benign familial neonatal seizures 1 Early infantile epileptic encephalopathy 7 Early infantile epileptic encephalopathy 7 | Pathogenic(Last reviewed: Apr 6, 2021)                                   | criteria provided, multiple submitters, no conflicts | VCV000219235 | 20               | 63439608       | 219235      | 217258      | rs864321707  | LOF        | 0.84     | 0.063        | 0.098    |
| KCNQ2 | 309 | A   | V   | NM_172107.4(KCNQ2):c.926C>T (p.Ala309Val) | Early infantile epileptic encephalopathy 7 Early infantile epileptic encephalopathy with suppression bursts                                                                                             | Pathogenic(Last reviewed: Mar 10, 2020)                                  | criteria provided, multiple submitters, no conflicts | VCV000369772 | 20               | 63439599       | 369772      | 354004      | NA           | LOF        | 0.843    | 0.062        | 0.095    |
| KCNQ2 | 310 | G   | S   | NM_172107.4(KCNQ2):c.928G>A (p.Gly310Ser) | Early infantile epileptic encephalopathy with suppression bursts Early infantile epileptic encephalopathy 7                                                                                             | Conflicting interpretations of pathogenicity(Last reviewed: Mar 6, 2018) | criteria provided, conflicting interpretations       | VCV000576538 | 20               | 63438720       | 576538      | 572967      | rs1568925719 | LOF        | 0.837    | 0.079        | 0.084    |
| KCNQ2 | 311 | I   | N   | NM_172107.4(KCNQ2):c.932T>A (p.Ile311Asn) | not provided                                                                                                                                                                                            | Likely pathogenic(Last reviewed: May 5, 2017)                            | criteria provided, single submitter                  | VCV000429385 | 20               | 63438716       | 429385      | 422341      | rs1131691356 | LOF        | 0.842    | 0.064        | 0.093    |
| KCNQ2 | 312 | L   | F   | NM_172107.4(KCNQ2):c.936G>T (p.Leu312Phe) | Benign familial neonatal seizures 1                                                                                                                                                                     | Likely pathogenic(Last reviewed: Dec 7, 2021)                            | criteria provided, single submitter                  | VCV001329944 | 20               | 63438712       | 1329944     | 1320628     | NA           | LOF        | 0.824    | 0.047        | 0.129    |
| KCNQ2 | 312 | L   | S   | NM_172107.4(KCNQ2):c.935T>C (p.Leu312Ser) | not provided                                                                                                                                                                                            | Likely pathogenic(Last reviewed: Dec 15, 2016)                           | criteria provided, single submitter                  | VCV000373802 | 20               | 63438713       | 373802      | 360476      | rs1057518619 | LOF        | 0.84     | 0.066        | 0.094    |
| KCNQ2 | 313 | G   | W   | NM_172107.4(KCNQ2):c.937G>T (p.Gly313Trp) | not provided                                                                                                                                                                                            | Uncertain significance(Last reviewed: Nov 4, 2013)                       | criteria provided, single submitter                  | VCV000205890 | 20               | 63438711       | 205890      | 203768      | rs796052639  | LOF        | 0.878    | 0.041        | 0.081    |
| KCNQ2 | 314 | S   | P   | NM_172107.4(KCNQ2):c.940T>C (p.Ser314Pro) | not provided                                                                                                                                                                                            | Likely pathogenic(Last reviewed: May 25, 2016)                           | criteria provided, single submitter                  | VCV000421323 | 20               | 63438708       | 421323      | 410826      | rs1064795058 | LOF        | 0.817    | 0.073        | 0.11     |
| KCNQ2 | 315 | G   | R   | NM_172107.4(KCNQ2):c.943G>C (p.Gly315Arg) | Early infantile epileptic encephalopathy 7                                                                                                                                                              | Pathogenic(Last reviewed: Mar 31, 2016)                                  | no assertion criteria provided                       | VCV000219237 | 20               | 63438705       | 219237      | 217257      | rs864321709  | LOF        | 0.865    | 0.043        | 0.092    |
| KCNQ2 | 317 | A   | T   | NM_172107.4(KCNQ2):c.949G>A (p.Ala317Thr) | Early infantile epileptic encephalopathy 7                                                                                                                                                              | Likely pathogenic(Last reviewed: Sep 12, 2019)                           | criteria provided, single submitter                  | VCV000812166 | 20               | 63438699       | 812166      | 800409      | rs1600751236 | LOF        | 0.827    | 0.035        | 0.138    |
| KCNQ2 | 319 | K   | E   | NM_172107.4(KCNQ2):c.955A>G (p.Lys319Glu) | Benign familial neonatal seizures 1                                                                                                                                                                     | Likely pathogenic(Last reviewed: Jul 16, 2021)                           | no assertion criteria provided                       | VCV001077102 | 20               | 63438693       | 1077102     | 1065742     | NA           | LOF        | 0.883    | 0.031        | 0.085    |
| KCNQ2 | 319 | K   | R   | NM_172107.4(KCNQ2):c.956A>G (p.Lys319Arg) | not provided                                                                                                                                                                                            | Likely pathogenic(Last reviewed: Feb 7, 2017)                            | criteria provided, single submitter                  | VCV000393264 | 20               | 63438692       | 393264      | 377145      | rs1057524860 | LOF        | 0.885    | 0.031        | 0.085    |

| gene  | pos | aa1 | aa2 | Name                                       | Condition(s)                                                                                                                                                                | Clinical significance (Last reviewed)                                     | Review status                                        | Accession    | GRCh38Chromosome | GRCh38Location | VariationID | AlleleID(s) | dbSNP ID     | prediction | prob.LOF | prob.Neutral | prob.GOF |
|-------|-----|-----|-----|--------------------------------------------|-----------------------------------------------------------------------------------------------------------------------------------------------------------------------------|---------------------------------------------------------------------------|------------------------------------------------------|--------------|------------------|----------------|-------------|-------------|--------------|------------|----------|--------------|----------|
| KCNQ2 | 324 | H   | Y   | NM_172107.4(KCNQ2):c.970C>T (p.His324Tyr)  | Early infantile epileptic encephalopathy with suppression bursts                                                                                                            | Likely pathogenic(Last reviewed: Aug 16, 2020)                            | criteria provided, single submitter                  | VCV001066649 | 20               | 63438678       | 1066649     | 1056621     | NA           | LOF        | 0.832    | 0.033        | 0.136    |
| KCNQ2 | 325 | R   | G   | NM_172107.4(KCNQ2):c.973A>G (p.Arg325Gly)  | Early infantile epileptic encephalopathy 7                                                                                                                                  | Pathogenic(Last reviewed: Mar 31, 2016)                                   | no assertion criteria provided                       | VCV000369775 | 20               | 63438675       | 369775      | 354001      | rs1057516103 | LOF        | 0.86     | 0.04         | 0.1      |
| KCNQ2 | 327 | K   | N   | NM_172107.4(KCNQ2):c.981G>T (p.Lys327Asn)  | Early infantile epileptic encephalopathy with suppression bursts                                                                                                            | Uncertain significance(Last reviewed: Apr 15, 2020)                       | criteria provided, single submitter                  | VCV001059815 | 20               | 63438667       | 1059815     | 1051780     | NA           | LOF        | 0.886    | 0.036        | 0.079    |
| KCNQ2 | 328 | H   | N   | NM_172107.4(KCNQ2):c.982C>A (p.His328Asn)  | not provided Early infantile epileptic encephalopathy with suppression bursts                                                                                               | Conflicting interpretations of pathogenicity(Last reviewed: Aug 20, 2020) | criteria provided, conflicting interpretations       | VCV000431951 | 20               | 63438666       | 431951      | 426352      | rs1555869803 | LOF        | 0.866    | 0.037        | 0.097    |
| KCNQ2 | 329 | F   | S   | NM_172107.4(KCNQ2):c.986T>C (p.Phe329Ser)  | not provided                                                                                                                                                                | Likely pathogenic(Last reviewed: Feb 16, 2017)                            | criteria provided, single submitter                  | VCV000423623 | 20               | 63438662       | 423623      | 410825      | rs1064796535 | LOF        | 0.797    | 0.039        | 0.164    |
| KCNQ2 | 331 | K   | T   | NM_172107.4(KCNQ2):c.992A>C (p.Lys331Thr)  | not provided                                                                                                                                                                | Likely pathogenic(Last reviewed: May 18, 2017)                            | criteria provided, single submitter                  | VCV000618186 | 20               | 63438656       | 618186      | 610161      | rs1568925523 | LOF        | 0.879    | 0.033        | 0.087    |
| KCNQ2 | 332 | R   | G   | NM_172107.4(KCNQ2):c.994A>G (p.Arg332Gly)  | Seizures Inborn genetic diseases Early infantile epileptic encephalopathy with suppression bursts                                                                           | Likely pathogenic(Last reviewed: Apr 23, 2017)                            | criteria provided, multiple submitters, no conflicts | VCV000461424 | 20               | 63438654       | 461424      | 470488      | rs1555869758 | LOF        | 0.872    | 0.038        | 0.089    |
| KCNQ2 | 332 | R   | K   | NM_172107.4(KCNQ2):c.995G>A (p.Arg332Lys)  | not provided                                                                                                                                                                | Uncertain significance(Last reviewed: Oct 31, 2012)                       | criteria provided, single submitter                  | VCV000205891 | 20               | 63438653       | 205891      | 203767      | rs796052640  | LOF        | 0.894    | 0.031        | 0.074    |
| KCNQ2 | 333 | R   | Q   | NM_172107.4(KCNQ2):c.998G>A (p.Arg333Gln)  | Early infantile epileptic encephalopathy with suppression bursts not provided Benign familial neonatal seizures 1                                                           | Pathogenic(Last reviewed: Nov 29, 2021)                                   | criteria provided, multiple submitters, no conflicts | VCV000021810 | 20               | 63438650       | 21810       | 34662       | rs118192216  | LOF        | 0.878    | 0.032        | 0.09     |
| KCNQ2 | 333 | R   | W   | NM_172107.4(KCNQ2):c.997C>T (p.Arg333Trp)  | Early infantile epileptic encephalopathy with suppression bursts not provided Early infantile epileptic encephalopathy 7                                                    | Pathogenic(Last reviewed: Aug 27, 2021)                                   | criteria provided, multiple submitters, no conflicts | VCV000021809 | 20               | 63438651       | 21809       | 34661       | rs118192215  | LOF        | 0.865    | 0.034        | 0.101    |
| KCNQ2 | 335 | P   | A   | NM_172107.4(KCNQ2):c.1003C>G (p.Pro335Ala) | Early infantile epileptic encephalopathy with suppression bursts                                                                                                            | Pathogenic(Last reviewed: Nov 25, 2018)                                   | criteria provided, single submitter                  | VCV000646824 | 20               | 63438645       | 646824      | 650418      | rs1555869700 | LOF        | 0.864    | 0.035        | 0.101    |
| KCNQ2 | 335 | P   | L   | NM_172107.4(KCNQ2):c.1004C>T (p.Pro335Leu) | not provided Seizures Epicentrus Autistic behavior Intellectual disability, moderate Abnormal facial shape Early infantile epileptic encephalopathy with suppression bursts | Pathogenic/Likely pathogenic(Last reviewed: Jul 14, 2021)                 | criteria provided, multiple submitters, no conflicts | VCV000205892 | 20               | 63438644       | 205892      | 203766      | rs796052641  | LOF        | 0.848    | 0.034        | 0.118    |
| KCNQ2 | 335 | P   | S   | NM_172107.4(KCNQ2):c.1003C>T (p.Pro335Ser) | Early infantile epileptic encephalopathy with suppression bursts                                                                                                            | Likely pathogenic(Last reviewed: Feb 10, 2018)                            | criteria provided, single submitter                  | VCV000530528 | 20               | 63438645       | 530528      | 533690      | rs1555869700 | LOF        | 0.869    | 0.035        | 0.096    |
| KCNQ2 | 336 | A   | V   | NM_172107.4(KCNQ2):c.1007C>T (p.Ala336Val) | not provided                                                                                                                                                                | Likely pathogenic(Last reviewed: Mar 7, 2019)                             | criteria provided, single submitter                  | VCV001202917 | 20               | 63438641       | 1202917     | 1195548     | NA           | LOF        | 0.82     | 0.035        | 0.145    |
| KCNQ2 | 337 | A   | G   | NM_172107.4(KCNQ2):c.1010C>G (p.Ala337Gly) | Early infantile epileptic encephalopathy 7 not provided                                                                                                                     | Pathogenic(Last reviewed: Feb 6, 2014)                                    | criteria provided, single submitter                  | VCV000205894 | 20               | 63438638       | 205894      | 203764      | rs796052643  | LOF        | 0.839    | 0.044        | 0.117    |



| gene  | pos | aa1 | aa2 | Name                                       | Condition(s)                                                                                                                | Clinical significance (Last reviewed)                                    | Review status                                  | Accession    | GRCh38Chromosome | GRCh38Location | VariationID | AlleleID(s) | dbSNP ID     | prediction | prob.LOF | prob.Neutral | prob.GOF |
|-------|-----|-----|-----|--------------------------------------------|-----------------------------------------------------------------------------------------------------------------------------|--------------------------------------------------------------------------|------------------------------------------------|--------------|------------------|----------------|-------------|-------------|--------------|------------|----------|--------------|----------|
| KCNQ2 | 337 | A   | T   | NM_172107.4(KCNQ2):c.1009G>A (p.Ala337Thr) | not provided                                                                                                                | Pathogenic(Last reviewed: Aug 30, 2012)                                  | criteria provided, single submitter            | VCV000205893 | 20               | 63438639       | 205893      | 203765      | rs796052642  | LOF        | 0.821    | 0.035        | 0.144    |
| KCNQ2 | 339 | L   | Q   | NM_172107.4(KCNQ2):c.1016T>A (p.Leu339Gln) | Early infantile epileptic encephalopathy 7                                                                                  | Likely pathogenic(Last reviewed: Jan 1, 2018)                            | criteria provided, single submitter            | VCV000495272 | 20               | 63438632       | 495272      | 486772      | rs118192217  | LOF        | 0.807    | 0.035        | 0.158    |
| KCNQ2 | 339 | L   | R   | NM_172107.4(KCNQ2):c.1016T>G (p.Leu339Arg) | Benign familial neonatal seizures 1                                                                                         | Pathogenic(Last reviewed: Mar 31, 2016)                                  | no assertion criteria provided                 | VCV000021755 | 20               | 63438632       | 21755       | 34607       | rs118192217  | LOF        | 0.83     | 0.035        | 0.135    |
| KCNQ2 | 340 | I   | M   | NM_172107.4(KCNQ2):c.1020C>G (p.Ile340Met) | not provided                                                                                                                | Likely pathogenic(Last reviewed: Jul 17, 2014)                           | criteria provided, single submitter            | VCV000205896 | 20               | 63438628       | 205896      | 203763      | rs752073942  | LOF        | 0.73     | 0.036        | 0.233    |
| KCNQ2 | 341 | Q   | H   | NM_172107.4(KCNQ2):c.1023G>C (p.Gln341His) | Early infantile epileptic encephalopathy with suppression bursts                                                            | Pathogenic(Last reviewed: Apr 15, 2020)                                  | criteria provided, single submitter            | VCV000856627 | 20               | 63438625       | 856627      | 848537      | rs2081071680 | LOF        | 0.872    | 0.031        | 0.097    |
| KCNQ2 | 341 | Q   | R   | NM_172107.4(KCNQ2):c.1022A>G (p.Gln341Arg) | Early infantile epileptic encephalopathy 7                                                                                  | Pathogenic(Last reviewed: Dec 19, 2018)                                  | criteria provided, single submitter            | VCV000976423 | 20               | 63438626       | 976423      | 964539      | rs2081071796 | LOF        | 0.886    | 0.031        | 0.083    |
| KCNQ2 | 342 | S   | L   | NM_172107.4(KCNQ2):c.1025C>T (p.Ser342Leu) | Early infantile epileptic encephalopathy with suppression bursts                                                            | Uncertain significance(Last reviewed: Oct 28, 2020)                      | criteria provided, single submitter            | VCV001044294 | 20               | 63433902       | 1044294     | 1034795     | rs2080907267 | LOF        | 0.799    | 0.035        | 0.165    |
| KCNQ2 | 344 | W   | R   | NM_172107.4(KCNQ2):c.1030T>C (p.Trp344Arg) | Benign familial neonatal seizures 1                                                                                         | Pathogenic(Last reviewed: Mar 31, 2016)                                  | no assertion criteria provided                 | VCV000369777 | 20               | 63433897       | 369777      | 353999      | rs1057516105 | LOF        | 0.826    | 0.036        | 0.139    |
| KCNQ2 | 348 | A   | T   | NM_172107.4(KCNQ2):c.1042G>A (p.Ala348Thr) | Early infantile epileptic encephalopathy with suppression bursts                                                            | Uncertain significance(Last reviewed: May 5, 2019)                       | criteria provided, single submitter            | VCV000950074 | 20               | 63433885       | 950074      | 929245      | rs2080906700 | LOF        | 0.837    | 0.036        | 0.127    |
| KCNQ2 | 348 | A   | V   | NM_172107.4(KCNQ2):c.1043C>T (p.Ala348Val) | Early infantile epileptic encephalopathy with suppression bursts                                                            | Uncertain significance(Last reviewed: Jan 11, 2019)                      | criteria provided, single submitter            | VCV000567177 | 20               | 63433884       | 567177      | 572963      | rs1568916986 | LOF        | 0.804    | 0.036        | 0.16     |
| KCNQ2 | 349 | T   | A   | NM_172107.4(KCNQ2):c.1045A>G (p.Thr349Ala) | not provided                                                                                                                | Uncertain significance(Last reviewed: Nov 1, 2021)                       | criteria provided, single submitter            | VCV001335466 | 20               | 63433882       | 1335466     | 1326437     | NA           | LOF        | 0.842    | 0.041        | 0.118    |
| KCNQ2 | 349 | T   | I   | NM_172107.4(KCNQ2):c.1046C>T (p.Thr349Ile) | Benign familial neonatal seizures 1 Epileptic encephalopathy, early infantile, 1 Early infantile epileptic encephalopathy 7 | Conflicting interpretations of pathogenicity(Last reviewed: Jan 3, 2022) | criteria provided, conflicting interpretations | VCV000975417 | 20               | 63433881       | 975417      | 963916      | rs2080906453 | LOF        | 0.81     | 0.041        | 0.149    |
| KCNQ2 | 349 | T   | P   | NM_172107.4(KCNQ2):c.1045A>C (p.Thr349Pro) | Benign familial neonatal seizures 1 Early infantile epileptic encephalopathy 7                                              | Likely pathogenic(Last reviewed: Nov 1, 2021)                            | criteria provided, single submitter            | VCV001326317 | 20               | 63433882       | 1326317     | 1316719     | NA           | LOF        | 0.86     | 0.046        | 0.094    |
| KCNQ2 | 350 | N   | I   | NM_172107.4(KCNQ2):c.1049A>T (p.Asn350Ile) | not provided                                                                                                                | Likely pathogenic(Last reviewed: Mar 5, 2014)                            | criteria provided, single submitter            | VCV000205897 | 20               | 63433878       | 205897      | 203761      | rs772800738  | LOF        | 0.823    | 0.039        | 0.138    |
| KCNQ2 | 350 | N   | K   | NM_172107.4(KCNQ2):c.1050C>A (p.Asn350Lys) | Benign familial neonatal seizures 1                                                                                         | Likely pathogenic(Last reviewed: May 28, 2019)                           | criteria provided, single submitter            | VCV000803621 | 20               | 63433877       | 803621      | 791998      | rs1371059392 | LOF        | 0.875    | 0.036        | 0.088    |
| KCNQ2 | 350 | N   | S   | NM_172107.4(KCNQ2):c.1049A>G (p.Asn350Ser) | Early infantile epileptic encephalopathy with suppression bursts                                                            | Uncertain significance(Last reviewed: Sep 8, 2020)                       | criteria provided, single submitter            | VCV001053550 | 20               | 63433878       | 1053550     | 1051779     | NA           | LOF        | 0.857    | 0.038        | 0.104    |

| gene  | pos | aa1 | aa2 | Name                                                 | Condition(s)                                                                                                              | Clinical significance (Last reviewed)                                     | Review status                                        | Accession    | GRCh38Chromosome | GRCh38Location      | VariationID | AlleleID(s) | dbSNP ID     | prediction | prob.LOF | prob.Neutral | prob.GOF |
|-------|-----|-----|-----|------------------------------------------------------|---------------------------------------------------------------------------------------------------------------------------|---------------------------------------------------------------------------|------------------------------------------------------|--------------|------------------|---------------------|-------------|-------------|--------------|------------|----------|--------------|----------|
| KCNQ2 | 351 | L   | F   | NM_172107.4(KCNQ2):c.1051C>T (p.Leu351Phe)           | Benign familial neonatal seizures 1                                                                                       | Pathogenic(Last reviewed: Mar 31, 2016)                                   | no assertion criteria provided                       | VCV000369779 | 20               | 63433876            | 369779      | 353997      | rs1057516106 | GOF        | 0.514    | 0.047        | 0.439    |
| KCNQ2 | 351 | L   | V   | NM_172107.4(KCNQ2):c.1051C>G (p.Leu351Val)           | Benign familial neonatal seizures 1 Epilepsy, benign neonatal, 1, and/or myokymia                                         | Likely pathogenic(Last reviewed: Sep 28, 2018)                            | criteria provided, single submitter                  | VCV000369778 | 20               | 63433876            | 369778      | 353998      | rs1057516106 | GOF        | 0.475    | 0.048        | 0.476    |
| KCNQ2 | 352 | S   | P   | NM_172107.4(KCNQ2):c.1054T>C (p.Ser352Pro)           | Benign familial neonatal seizures 1                                                                                       | Pathogenic(Last reviewed: Mar 31, 2016)                                   | no assertion criteria provided                       | VCV000369781 | 20               | 63433873            | 369781      | 353995      | rs1057516108 | LOF        | 0.833    | 0.045        | 0.122    |
| KCNQ2 | 353 | R   | C   | NM_172107.4(KCNQ2):c.1057C>T (p.Arg353Cys)           | Early infantile epileptic encephalopathy with suppression bursts(not specified/not provided)                              | Conflicting interpretations of pathogenicity(Last reviewed: Dec 23, 2020) | criteria provided, conflicting interpretations       | VCV000205898 | 20               | 63433870            | 205898      | 203760      | rs118192218  | LOF        | 0.815    | 0.047        | 0.139    |
| KCNQ2 | 353 | R   | G   | NM_172107.4(KCNQ2):c.1056_1057delinsCG (p.Arg353Gly) | Early infantile epileptic encephalopathy with suppression bursts                                                          | Pathogenic(Last reviewed: Oct 19, 2020)                                   | criteria provided, single submitter                  | VCV001074881 | 20               | 63433870 - 63433871 | 1074881     | 1064856     | NA           | LOF        | 0.864    | 0.046        | 0.09     |
| KCNQ2 | 353 | R   | G   | NM_172107.4(KCNQ2):c.1056_1057delinsCG (p.Arg353Gly) | Early infantile epileptic encephalopathy with suppression bursts                                                          | Pathogenic(Last reviewed: Oct 19, 2020)                                   | criteria provided, single submitter                  | VCV001074881 | 20               | 63433870 - 63433871 | 1074881     | 1064856     | NA           | LOF        | 0.864    | 0.046        | 0.09     |
| KCNQ2 | 353 | R   | G   | NM_172107.4(KCNQ2):c.1057C>G (p.Arg353Gly)           | Benign familial neonatal seizures 1                                                                                       | Pathogenic(Last reviewed: Mar 31, 2016)                                   | no assertion criteria provided                       | VCV000021756 | 20               | 63433870            | 21756       | 34608       | rs118192218  | LOF        | 0.864    | 0.046        | 0.09     |
| KCNQ2 | 353 | R   | G   | NM_172107.4(KCNQ2):c.1057C>G (p.Arg353Gly)           | Benign familial neonatal seizures 1                                                                                       | Pathogenic(Last reviewed: Mar 31, 2016)                                   | no assertion criteria provided                       | VCV000021756 | 20               | 63433870            | 21756       | 34608       | rs118192218  | LOF        | 0.864    | 0.046        | 0.09     |
| KCNQ2 | 353 | R   | H   | NM_172107.4(KCNQ2):c.1058G>A (p.Arg353His)           | Early infantile epileptic encephalopathy 7(not provided) Early infantile epileptic encephalopathy with suppression bursts | Pathogenic/Likely pathogenic(Last reviewed: Oct 6, 2020)                  | criteria provided, multiple submitters, no conflicts | VCV000205899 | 20               | 63433869            | 205899      | 203759      | rs796052645  | LOF        | 0.875    | 0.037        | 0.088    |
| KCNQ2 | 355 | D   | E   | NM_172107.4(KCNQ2):c.1065C>A (p.Asp355Glu)           | Early infantile epileptic encephalopathy with suppression bursts                                                          | Likely pathogenic(Last reviewed: Jan 8, 2020)                             | criteria provided, single submitter                  | VCV000963965 | 20               | 63433862            | 963965      | 951147      | rs200395340  | LOF        | 0.879    | 0.041        | 0.079    |
| KCNQ2 | 355 | D   | E   | NM_172107.4(KCNQ2):c.1065C>A (p.Asp355Glu)           | Early infantile epileptic encephalopathy with suppression bursts                                                          | Likely pathogenic(Last reviewed: Jan 8, 2020)                             | criteria provided, single submitter                  | VCV000963965 | 20               | 63433862            | 963965      | 951147      | rs200395340  | LOF        | 0.879    | 0.041        | 0.079    |
| KCNQ2 | 355 | D   | E   | NM_172107.4(KCNQ2):c.1065C>G (p.Asp355Glu)           | not provided                                                                                                              | Uncertain significance(Last reviewed: Mar 30, 2017)                       | criteria provided, single submitter                  | VCV000445403 | 20               | 63433862            | 445403      | 438675      | rs200395340  | LOF        | 0.879    | 0.041        | 0.079    |
| KCNQ2 | 355 | D   | E   | NM_172107.4(KCNQ2):c.1065C>G (p.Asp355Glu)           | not provided                                                                                                              | Uncertain significance(Last reviewed: Mar 30, 2017)                       | criteria provided, single submitter                  | VCV000445403 | 20               | 63433862            | 445403      | 438675      | rs200395340  | LOF        | 0.879    | 0.041        | 0.079    |
| KCNQ2 | 355 | D   | G   | NM_172107.4(KCNQ2):c.1064A>G (p.Asp355Gly)           | Early infantile epileptic encephalopathy with suppression bursts                                                          | Pathogenic(Last reviewed: Jun 26, 2020)                                   | criteria provided, single submitter                  | VCV001074630 | 20               | 63433863            | 1074630     | 1064855     | NA           | LOF        | 0.864    | 0.047        | 0.09     |
| KCNQ2 | 355 | D   | V   | NM_172107.4(KCNQ2):c.1064A>T (p.Asp355Val)           | Early infantile epileptic encephalopathy 7                                                                                | Likely pathogenic(Last reviewed: Nov 26, 2018)                            | criteria provided, single submitter                  | VCV000976159 | 20               | 63433863            | 976159      | 964538      | rs2080905274 | LOF        | 0.838    | 0.039        | 0.123    |
| KCNQ2 | 355 | D   | Y   | NM_172107.4(KCNQ2):c.1063G>T (p.Asp355Tyr)           | Early infantile epileptic encephalopathy with suppression bursts                                                          | Uncertain significance(Last reviewed: Jul 9, 2020)                        | criteria provided, single submitter                  | VCV001003511 | 20               | 63433864            | 1003511     | 999086      | rs2080905348 | LOF        | 0.858    | 0.038        | 0.104    |
| KCNQ2 | 356 | L   | P   | NM_172107.4(KCNQ2):c.1067T>C (p.Leu356Pro)           | not provided Early infantile epileptic encephalopathy with suppression bursts                                             | Conflicting interpretations of                                            | criteria provided,                                   | VCV000422045 | 20               | 63433860            | 422045      | 410824      | rs1057518772 | LOF        | 0.807    | 0.039        | 0.154    |

| gene  | pos | aa1 | aa2 | Name                                       | Condition(s)                                                                                                      | Clinical significance (Last reviewed)                                     | Review status                                        | Accession    | GRCh38Chromosome | GRCh38Location | VariationID | AlleleID(s) | dbSNP ID     | prediction | prob.LOF | prob.Neutral | prob.GOF |
|-------|-----|-----|-----|--------------------------------------------|-------------------------------------------------------------------------------------------------------------------|---------------------------------------------------------------------------|------------------------------------------------------|--------------|------------------|----------------|-------------|-------------|--------------|------------|----------|--------------|----------|
|       |     |     |     |                                            |                                                                                                                   | pathogenicity(Last reviewed: Dec 5, 2018)                                 | conflicting interpretations                          |              |                  |                |             |             |              |            |          |              |          |
| KCNQ2 | 356 | L   | R   | NM_172107.4(KCNQ2):c.1067T>G (p.Leu356Arg) | Intellectual disability Early infantile epileptic encephalopathy 7                                                | Likely pathogenic(Last reviewed: Jan 1, 2016)                             | criteria provided, single submitter                  | VCV000373925 | 20               | 63433860       | 373925      | 361066      | rs1057518772 | LOF        | 0.821    | 0.034        | 0.144    |
| KCNQ2 | 356 | L   | V   | NM_172107.4(KCNQ2):c.1066C>G (p.Leu356Val) | Early infantile epileptic encephalopathy 7                                                                        | Pathogenic(Last reviewed: Mar 31, 2016)                                   | no assertion criteria provided                       | VCV000369782 | 20               | 63433861       | 369782      | 353994      | rs1057516109 | GOF        | 0.669    | 0.038        | 0.293    |
| KCNQ2 | 358 | S   | F   | NM_172107.4(KCNQ2):c.1073C>T (p.Ser358Phe) | Benign familial neonatal seizures 1                                                                               | Pathogenic(Last reviewed: Mar 31, 2016)                                   | no assertion criteria provided                       | VCV000369783 | 20               | 63433854       | 369783      | 353993      | rs1057516110 | LOF        | 0.799    | 0.035        | 0.166    |
| KCNQ2 | 358 | S   | P   | NM_172107.4(KCNQ2):c.1072T>C (p.Ser358Pro) | Early infantile epileptic encephalopathy with suppression bursts                                                  | Uncertain significance(Last reviewed: Nov 26, 2019)                       | criteria provided, single submitter                  | VCV000844119 | 20               | 63433855       | 844119      | 848536      | rs2080904614 | LOF        | 0.858    | 0.038        | 0.104    |
| KCNQ2 | 359 | T   | A   | NM_172107.4(KCNQ2):c.1075A>G (p.Thr359Ala) | Early infantile epileptic encephalopathy with suppression bursts not provided                                     | Conflicting interpretations of pathogenicity(Last reviewed: Jun 25, 2019) | criteria provided, conflicting interpretations       | VCV000418633 | 20               | 63433852       | 418633      | 410823      | rs1064793334 | LOF        | 0.821    | 0.033        | 0.146    |
| KCNQ2 | 359 | T   | K   | NM_172107.4(KCNQ2):c.1076C>A (p.Thr359Lys) | Early infantile epileptic encephalopathy with suppression bursts Benign familial neonatal seizures 1              | Pathogenic(Last reviewed: Sep 24, 2018)                                   | criteria provided, single submitter                  | VCV000021757 | 20               | 63433851       | 21757       | 34609       | rs118192219  | LOF        | 0.869    | 0.031        | 0.1      |
| KCNQ2 | 359 | T   | M   | NM_172107.4(KCNQ2):c.1076C>T (p.Thr359Met) | Early infantile epileptic encephalopathy with suppression bursts not provided Benign familial neonatal seizures 1 | Conflicting interpretations of pathogenicity(Last reviewed: Aug 19, 2021) | criteria provided, conflicting interpretations       | VCV000976330 | 20               | 63433851       | 976330      | 964537      | rs118192219  | LOF        | 0.789    | 0.032        | 0.18     |
| KCNQ2 | 360 | W   | C   | NM_172107.4(KCNQ2):c.1080G>T (p.Trp360Cys) | Early infantile epileptic encephalopathy 7                                                                        | Likely pathogenic(Last reviewed: Jan 18, 2018)                            | criteria provided, single submitter                  | VCV000637022 | 20               | 63433847       | 637022      | 624870      | rs1600732174 | GOF        | 0.642    | 0.05         | 0.308    |
| KCNQ2 | 360 | W   | R   | NM_172107.4(KCNQ2):c.1078T>C (p.Trp360Arg) | Early infantile epileptic encephalopathy with suppression bursts                                                  | Uncertain significance(Last reviewed: Mar 21, 2019)                       | criteria provided, single submitter                  | VCV000848129 | 20               | 63433849       | 848129      | 848535      | rs2080904141 | LOF        | 0.825    | 0.037        | 0.138    |
| KCNQ2 | 362 | Y   | C   | NM_172107.4(KCNQ2):c.1085A>G (p.Tyr362Cys) | Benign familial neonatal seizures 1                                                                               | Pathogenic(Last reviewed: Mar 31, 2016)                                   | no assertion criteria provided                       | VCV000369784 | 20               | 63433842       | 369784      | 353992      | rs1057516111 | GOF        | 0.475    | 0.049        | 0.476    |
| KCNQ2 | 363 | Y   | C   | NM_172107.4(KCNQ2):c.1088A>G (p.Tyr363Cys) | not provided                                                                                                      | Uncertain significance(Last reviewed: Jun 1, 2016)                        | criteria provided, multiple submitters, no conflicts | VCV000198922 | 20               | 63433839       | 198922      | 196082      | rs794727935  | GOF        | 0.551    | 0.045        | 0.404    |
| KCNQ2 | 367 | V   | I   | NM_172107.4(KCNQ2):c.1099G>A (p.Val367Ile) | not provided                                                                                                      | Uncertain significance(Last reviewed: Apr 15, 2020)                       | criteria provided, single submitter                  | VCV001202324 | 20               | 63433828       | 1202324     | 1192273     | NA           | GOF        | 0.613    | 0.043        | 0.344    |
| KCNQ2 | 368 | T   | N   | NM_172107.4(KCNQ2):c.1103C>A (p.Thr368Asn) | Early infantile epileptic encephalopathy with suppression bursts                                                  | Uncertain significance(Last reviewed: Jun 17, 2019)                       | criteria provided, single submitter                  | VCV000946732 | 20               | 63433824       | 946732      | 929244      | rs900170305  | LOF        | 0.81     | 0.041        | 0.149    |
| KCNQ2 | 368 | T   | S   | NM_172107.4(KCNQ2):c.1103C>G (p.Thr368Ser) | not provided                                                                                                      | Uncertain significance(Last reviewed: Sep 10, 2019)                       | criteria provided, single submitter                  | VCV001311180 | 20               | 63433824       | 1311180     | 1300561     | NA           | LOF        | 0.775    | 0.041        | 0.184    |
| KCNQ2 | 370 | P   | R   | NM_172107.4(KCNQ2):c.1109C>G (p.Pro370Arg) | Early infantile epileptic encephalopathy with suppression bursts                                                  | Uncertain significance(Last reviewed: May 19,                             | criteria provided, single submitter                  | VCV000405211 | 20               | 63433818       | 405211      | 403698      | rs765394232  | LOF        | 0.837    | 0.042        | 0.121    |

| gene  | pos | aa1 | aa2 | Name                                       | Condition(s)                                                                            | Clinical significance (Last reviewed)                                     | Review status                                        | Accession    | GRCh38Chromosome | GRCh38Location | VariationID | AlleleID(s) | dbSNP ID     | prediction | prob.LOF | prob.Neutral | prob.GOF |
|-------|-----|-----|-----|--------------------------------------------|-----------------------------------------------------------------------------------------|---------------------------------------------------------------------------|------------------------------------------------------|--------------|------------------|----------------|-------------|-------------|--------------|------------|----------|--------------|----------|
|       |     |     |     |                                            |                                                                                         | 2018)                                                                     |                                                      |              |                  |                |             |             |              |            |          |              |          |
| KCNQ2 | 370 | P   | T   | NM_172107.4(KCNQ2):c.1108C>A (p.Pro370Thr) | Early infantile epileptic encephalopathy with suppression bursts                        | Uncertain significance(Last reviewed: Mar 17, 2020)                       | criteria provided, single submitter                  | VCV001024136 | 20               | 63433819       | 1024136     | 1014209     | rs2080902130 | LOF        | 0.789    | 0.041        | 0.17     |
| KCNQ2 | 371 | M   | L   | NM_172107.4(KCNQ2):c.1111A>C (p.Met371Leu) | not provided                                                                            | Uncertain significance(Last reviewed: Nov 1, 2019)                        | criteria provided, single submitter                  | VCV001309884 | 20               | 63433816       | 1309884     | 1299259     | NA           | GOF        | 0.624    | 0.045        | 0.331    |
| KCNQ2 | 373 | R   | I   | NM_172107.4(KCNQ2):c.1118G>T (p.Ser373Ile) | Early infantile epileptic encephalopathy 7                                              | Uncertain significance(Last reviewed: Jan 3, 2022)                        | criteria provided, single submitter                  | VCV001333324 | 20               | 63433809       | 1333324     | 1324099     | NA           | LOF        | 0.745    | 0.051        | 0.204    |
| KCNQ2 | 374 | S   | L   | NM_172107.4(KCNQ2):c.1121C>T (p.Ser374Leu) | Seizures Early infantile epileptic encephalopathy with suppression bursts not specified | Conflicting interpretations of pathogenicity(Last reviewed: Sep 16, 2020) | criteria provided, conflicting interpretations       | VCV000513677 | 20               | 63431367       | 513677      | 507877      | rs777940990  | LOF        | 0.751    | 0.06         | 0.188    |
| KCNQ2 | 374 | Y   | C   | NM_172107.4(KCNQ2):c.1118+3A>G             | Benign familial neonatal seizures 1                                                     | Pathogenic(Last reviewed: Mar 31, 2016)                                   | no assertion criteria provided                       | VCV000369785 | 20               | 63433806       | 369785      | 353991      | rs1057516112 | GOF        | 0.686    | 0.066        | 0.249    |
| KCNQ2 | 374 | Y   | D   | NM_172107.4(KCNQ2):c.1118+2T>G             | Early infantile epileptic encephalopathy with suppression bursts not provided           | Pathogenic(Last reviewed: Feb 2, 2020)                                    | criteria provided, multiple submitters, no conflicts | VCV001073519 | 20               | 63433807       | 1073519     | 1064852     | NA           | LOF        | 0.787    | 0.064        | 0.149    |
| KCNQ2 | 374 | Y   | H   | NM_172107.4(KCNQ2):c.1118+2T>C             | Early infantile epileptic encephalopathy with suppression bursts not provided           | Pathogenic/Likely pathogenic(Last reviewed: Mar 18, 2020)                 | criteria provided, multiple submitters, no conflicts | VCV000283350 | 20               | 63433807       | 283350      | 267587      | rs886042605  | LOF        | 0.756    | 0.058        | 0.186    |
| KCNQ2 | 375 | R   | C   | NM_172107.4(KCNQ2):c.1118+5C>T             | Early infantile epileptic encephalopathy with suppression bursts                        | Uncertain significance(Last reviewed: Oct 25, 2019)                       | criteria provided, single submitter                  | VCV000840062 | 20               | 63433804       | 840062      | 852381      | rs903746022  | LOF        | 0.76     | 0.062        | 0.177    |
| KCNQ2 | 376 | R   | C   | NM_172107.4(KCNQ2):c.1118+8C>T             | not specified                                                                           | Likely benign(Last reviewed: Mar 16, 2017)                                | criteria provided, single submitter                  | VCV000516129 | 20               | 63433801       | 516129      | 507301      | rs754114486  | LOF        | 0.75     | 0.07         | 0.179    |
| KCNQ2 | 377 | R   | W   | NM_172107.4(KCNQ2):c.1118+11C>T            | not specified                                                                           | Likely benign(Last reviewed: Jan 4, 2018)                                 | criteria provided, single submitter                  | VCV000514453 | 20               | 63433798       | 514453      | 508271      | rs138176417  | LOF        | 0.799    | 0.055        | 0.146    |
| KCNQ2 | 378 | T   | S   | NM_172107.4(KCNQ2):c.1133C>G (p.Thr378Ser) | not provided                                                                            | Uncertain significance(Last reviewed: Feb 20, 2020)                       | criteria provided, single submitter                  | VCV001304076 | 20               | 63431355       | 1304076     | 1294351     | NA           | LOF        | 0.752    | 0.054        | 0.194    |
| KCNQ2 | 379 | P   | L   | NM_172107.4(KCNQ2):c.1118+18C>T            | Early infantile epileptic encephalopathy 7                                              | Uncertain significance(Last reviewed: Jan 17, 2020)                       | criteria provided, single submitter                  | VCV001029262 | 20               | 63433791       | 1029262     | 1018720     | rs2080900462 | GOF        | 0.705    | 0.061        | 0.234    |
| KCNQ2 | 379 | Y   | F   | NM_172107.4(KCNQ2):c.1136A>T (p.Tyr379Phe) | not provided                                                                            | Uncertain significance(Last reviewed: May 26, 2017)                       | criteria provided, single submitter                  | VCV000430416 | 20               | 63431352       | 430416      | 422340      | rs752773828  | GOF        | 0.628    | 0.056        | 0.317    |
| KCNQ2 | 380 | G   | R   | NM_172107.4(KCNQ2):c.1138G>A (p.Gly380Arg) | Early infantile epileptic encephalopathy with suppression bursts                        | Uncertain significance(Last reviewed: Mar 4, 2020)                        | criteria provided, single submitter                  | VCV001016895 | 20               | 63431350       | 1016895     | 1014208     | rs764614789  | LOF        | 0.796    | 0.069        | 0.135    |
| KCNQ2 | 381 | A   | D   | NM_172107.4(KCNQ2):c.1142C>A (p.Ala381Asp) | not provided                                                                            | Uncertain significance(Last reviewed: Oct 14, 2019)                       | criteria provided, single submitter                  | VCV001308969 | 20               | 63431346       | 1308969     | 1300997     | NA           | LOF        | 0.763    | 0.058        | 0.179    |

| gene  | pos | aa1 | aa2 | Name                                       | Condition(s)                                                                                                                                                 | Clinical significance (Last reviewed)               | Review status                                        | Accession    | GRCh38Chromosome | GRCh38Location | VariationID | AlleleID(s) | dbSNP ID     | prediction | prob.LOF | prob.Neutral | prob.GOF |
|-------|-----|-----|-----|--------------------------------------------|--------------------------------------------------------------------------------------------------------------------------------------------------------------|-----------------------------------------------------|------------------------------------------------------|--------------|------------------|----------------|-------------|-------------|--------------|------------|----------|--------------|----------|
| KCNQ2 | 385 | I   | N   | NM_172107.4(KCNQ2):c.1154T>A (p.Ile385Asn) | not provided                                                                                                                                                 | Uncertain significance(Last reviewed: Aug 1, 2016)  | criteria provided, single submitter                  | VCV000374487 | 20               | 63428430       | 374487      | 361373      | rs1057519123 | GOF        | 0.709    | 0.054        | 0.237    |
| KCNQ2 | 391 | I   | V   | NM_172107.4(KCNQ2):c.1118+53A>G            | not specified                                                                                                                                                | Likely benign(Last reviewed: Dec 27, 2012)          | criteria provided, single submitter                  | VCV000205834 | 20               | 63433756       | 205834      | 203756      | rs780492963  | GOF        | 0.527    | 0.054        | 0.42     |
| KCNQ2 | 391 | L   | P   | NM_172107.4(KCNQ2):c.1172T>C (p.Leu391Pro) | not provided                                                                                                                                                 | Uncertain significance(Last reviewed: Mar 8, 2012)  | criteria provided, single submitter                  | VCV000205900 | 20               | 63428412       | 205900      | 203752      | rs796052646  | GOF        | 0.688    | 0.056        | 0.256    |
| KCNQ2 | 393 | L   | V   | NM_172107.4(KCNQ2):c.1207C>G (p.Leu403Val) | Early infantile epileptic encephalopathy with suppression bursts                                                                                             | Uncertain significance(Last reviewed: Jul 10, 2020) | criteria provided, single submitter                  | VCV000998578 | 20               | 63428377       | 998578      | 999085      | rs1166282198 | GOF        | 0.53     | 0.053        | 0.417    |
| KCNQ2 | 394 | L   | P   | NM_172107.4(KCNQ2):c.1181T>C (p.Leu394Pro) | Early infantile epileptic encephalopathy with suppression bursts                                                                                             | Uncertain significance(Last reviewed: Feb 27, 2019) | criteria provided, single submitter                  | VCV000842767 | 20               | 63428403       | 842767      | 848534      | rs2080695319 | LOF        | 0.738    | 0.067        | 0.195    |
| KCNQ2 | 398 | D   | H   | NM_172107.4(KCNQ2):c.1222G>C (p.Asp408His) | Early infantile epileptic encephalopathy with suppression bursts                                                                                             | Uncertain significance(Last reviewed: Jul 17, 2019) | criteria provided, single submitter                  | VCV000951470 | 20               | 63424202       | 951470      | 929243      | rs2080560881 | LOF        | 0.822    | 0.06         | 0.117    |
| KCNQ2 | 400 | K   | E   | NM_172107.4(KCNQ2):c.1198A>G (p.Lys400Glu) | not provided                                                                                                                                                 | Uncertain significance(Last reviewed: Jul 23, 2018) | criteria provided, single submitter                  | VCV000205901 | 20               | 63428386       | 205901      | 203751      | rs796052647  | LOF        | 0.834    | 0.062        | 0.104    |
| KCNQ2 | 401 | P   | Q   | NM_172107.4(KCNQ2):c.1232C>A (p.Pro411Gln) | Early infantile epileptic encephalopathy with suppression bursts                                                                                             | Uncertain significance(Last reviewed: Sep 10, 2020) | criteria provided, single submitter                  | VCV001025896 | 20               | 63424192       | 1025896     | 1014207     | rs754682495  | LOF        | 0.811    | 0.063        | 0.125    |
| KCNQ2 | 401 | P   | R   | NM_172107.4(KCNQ2):c.1232C>G (p.Pro411Arg) | Early infantile epileptic encephalopathy with suppression bursts                                                                                             | Uncertain significance(Last reviewed: Aug 7, 2020)  | criteria provided, single submitter                  | VCV001057136 | 20               | 63424192       | 1057136     | 1051778     | NA           | LOF        | 0.814    | 0.068        | 0.118    |
| KCNQ2 | 404 | A   | D   | NM_172107.4(KCNQ2):c.1211C>A (p.Ala404Asp) | Early infantile epileptic encephalopathy with suppression bursts                                                                                             | Uncertain significance(Last reviewed: Oct 25, 2016) | criteria provided, single submitter                  | VCV000405207 | 20               | 63428373       | 405207      | 403693      | rs1060500601 | LOF        | 0.783    | 0.068        | 0.149    |
| KCNQ2 | 406 | R   | G   | NM_172107.4(KCNQ2):c.1216A>G (p.Arg406Gly) | Early infantile epileptic encephalopathy with suppression bursts(not provided)                                                                               | Uncertain significance(Last reviewed: Feb 19, 2018) | criteria provided, multiple submitters, no conflicts | VCV000452880 | 20               | 63428368       | 452880      | 446288      | rs1240338507 | LOF        | 0.831    | 0.061        | 0.108    |
| KCNQ2 | 410 | P   | L   | NM_172107.4(KCNQ2):c.1229C>T (p.Pro410Leu) | not provided Early infantile epileptic encephalopathy with suppression bursts Early infantile epileptic encephalopathy 7 Benign familial neonatal seizures 1 | Uncertain significance(Last reviewed: Oct 1, 2020)  | criteria provided, multiple submitters, no conflicts | VCV000461403 | 20               | 63424195       | 461403      | 470987      | rs752579642  | LOF        | 0.791    | 0.077        | 0.131    |
| KCNQ2 | 411 | P   | L   | NM_172107.4(KCNQ2):c.1232C>T (p.Pro411Leu) | Early infantile epileptic encephalopathy with suppression bursts                                                                                             | Likely benign(Last reviewed: Jul 3, 2017)           | criteria provided, single submitter                  | VCV000461404 | 20               | 63424192       | 461404      | 469445      | rs754682495  | LOF        | 0.785    | 0.081        | 0.134    |
| KCNQ2 | 413 | P   | R   | NM_172107.4(KCNQ2):c.1238C>G (p.Pro413Arg) | Early infantile epileptic encephalopathy with suppression bursts                                                                                             | Uncertain significance(Last reviewed: May 31, 2017) | criteria provided, single submitter                  | VCV000461405 | 20               | 63424186       | 461405      | 470986      | rs1270343938 | LOF        | 0.814    | 0.079        | 0.108    |
| KCNQ2 | 414 | S   | C   | NM_172107.4(KCNQ2):c.1241C>G (p.Ser414Cys) | not provided Early infantile epileptic encephalopathy with suppression bursts                                                                                | Uncertain significance(Last reviewed: Nov 27, 2019) | criteria provided, multiple submitters, no conflicts | VCV000449179 | 20               | 63424183       | 449179      | 446286      | rs1555859111 | LOF        | 0.804    | 0.066        | 0.13     |

| gene  | pos | aa1 | aa2 | Name                                       | Condition(s)                                                                                                             | Clinical significance (Last reviewed)                                     | Review status                                        | Accession    | GRCh38Chromosome | GRCh38Location | VariationID | AlleleID(s) | dbSNP ID     | prediction | prob.LOF | prob.Neutral | prob.GOF |
|-------|-----|-----|-----|--------------------------------------------|--------------------------------------------------------------------------------------------------------------------------|---------------------------------------------------------------------------|------------------------------------------------------|--------------|------------------|----------------|-------------|-------------|--------------|------------|----------|--------------|----------|
| KCNQ2 | 417 | K   | E   | NM_172107.4(KCNQ2):c.1249A>G (p.Lys417Glu) | not provided                                                                                                             | Uncertain significance(Last reviewed: Jun 20, 2019)                       | criteria provided, single submitter                  | VCV001306474 | 20               | 63419671       | 1306474     | 1296417     | NA           | LOF        | 0.801    | 0.092        | 0.107    |
| KCNQ2 | 417 | S   | P   | NM_172107.4(KCNQ2):c.1333T>C (p.Ser445Pro) | Early infantile epileptic encephalopathy with suppression bursts                                                         | Uncertain significance(Last reviewed: Jun 29, 2020)                       | criteria provided, single submitter                  | VCV001009330 | 20               | 63415095       | 1009330     | 999084      | rs2080246296 | LOF        | 0.789    | 0.096        | 0.115    |
| KCNQ2 | 418 | G   | V   | NM_172107.4(KCNQ2):c.1253G>T (p.Gly418Val) | not specified Early infantile epileptic encephalopathy with suppression bursts                                           | Likely benign(Last reviewed: Oct 9, 2020)                                 | criteria provided, multiple submitters, no conflicts | VCV000205902 | 20               | 63419667       | 205902      | 203750      | rs201750561  | LOF        | 0.763    | 0.09         | 0.147    |
| KCNQ2 | 420 | P   | L   | NM_172107.4(KCNQ2):c.1259C>T (p.Pro420Leu) | Early infantile epileptic encephalopathy with suppression bursts not provided Early infantile epileptic encephalopathy 7 | Uncertain significance(Last reviewed: Mar 5, 2020)                        | criteria provided, multiple submitters, no conflicts | VCV000287222 | 20               | 63419661       | 287222      | 271459      | rs139164500  | LOF        | 0.756    | 0.075        | 0.169    |
| KCNQ2 | 420 | P   | Q   | NM_172107.4(KCNQ2):c.1259C>A (p.Pro420Gln) | Early infantile epileptic encephalopathy with suppression bursts                                                         | Uncertain significance(Last reviewed: Feb 21, 2020)                       | criteria provided, single submitter                  | VCV000855526 | 20               | 63419661       | 855526      | 848532      | rs139164500  | LOF        | 0.785    | 0.075        | 0.14     |
| KCNQ2 | 420 | P   | R   | NM_172107.4(KCNQ2):c.1259C>G (p.Pro420Arg) | not provided                                                                                                             | Uncertain significance(Last reviewed: Jul 23, 2014)                       | criteria provided, single submitter                  | VCV000205903 | 20               | 63419661       | 205903      | 203749      | rs139164500  | LOF        | 0.789    | 0.08         | 0.132    |
| KCNQ2 | 420 | P   | S   | NM_172107.4(KCNQ2):c.1258C>T (p.Pro420Ser) | Early infantile epileptic encephalopathy with suppression bursts                                                         | Uncertain significance(Last reviewed: May 5, 2019)                        | criteria provided, single submitter                  | VCV000837816 | 20               | 63419662       | 837816      | 848533      | rs2080406431 | LOF        | 0.775    | 0.076        | 0.148    |
| KCNQ2 | 421 | A   | V   | NM_172107.4(KCNQ2):c.1352C>T (p.Ala451Val) | Early infantile epileptic encephalopathy with suppression bursts                                                         | Uncertain significance(Last reviewed: May 13, 2020)                       | criteria provided, single submitter                  | VCV000999695 | 20               | 63415076       | 999695      | 999083      | rs774027338  | GOF        | 0.656    | 0.059        | 0.285    |
| KCNQ2 | 422 | A   | T   | NM_172107.4(KCNQ2):c.1354G>A (p.Ala452Thr) | Early infantile epileptic encephalopathy with suppression bursts                                                         | Uncertain significance(Last reviewed: Jun 8, 2020)                        | criteria provided, single submitter                  | VCV001011047 | 20               | 63415074       | 1011047     | 999082      | rs2080245324 | LOF        | 0.752    | 0.072        | 0.176    |
| KCNQ2 | 424 | P   | S   | NM_172107.4(KCNQ2):c.1270C>T (p.Pro424Ser) | Seizures not provided Early infantile epileptic encephalopathy with suppression bursts                                   | Conflicting interpretations of pathogenicity(Last reviewed: Oct 16, 2020) | criteria provided, conflicting interpretations       | VCV000405210 | 20               | 63419650       | 405210      | 404201      | rs748120886  | LOF        | 0.771    | 0.083        | 0.146    |
| KCNQ2 | 427 | G   | E   | NM_172107.4(KCNQ2):c.1280G>A (p.Gly427Glu) | Early infantile epileptic encephalopathy 7                                                                               | Uncertain significance(Last reviewed: Aug 25, 2019)                       | no assertion criteria provided                       | VCV000800807 | 20               | 63419640       | 800807      | 788941      | rs1601590796 | LOF        | 0.79     | 0.081        | 0.129    |
| KCNQ2 | 428 | P   | L   | NM_172107.4(KCNQ2):c.1373C>T (p.Pro458Leu) | Early infantile epileptic encephalopathy with suppression bursts                                                         | Uncertain significance(Last reviewed: May 4, 2020)                        | criteria provided, single submitter                  | VCV001002529 | 20               | 63415055       | 1002529     | 999081      | rs1206195455 | LOF        | 0.734    | 0.075        | 0.191    |
| KCNQ2 | 429 | C   | F   | NM_172107.4(KCNQ2):c.1286G>T (p.Cys429Phe) | Early infantile epileptic encephalopathy with suppression bursts                                                         | Uncertain significance(Last reviewed: Jul 5, 2019)                        | criteria provided, single submitter                  | VCV000665620 | 20               | 63419634       | 665620      | 650426      | rs1601590761 | LOF        | 0.703    | 0.068        | 0.23     |
| KCNQ2 | 429 | C   | Y   | NM_172107.4(KCNQ2):c.1286G>A (p.Cys429Tyr) | Early infantile epileptic encephalopathy with suppression bursts                                                         | Uncertain significance(Last reviewed: Dec 8, 2019)                        | criteria provided, single submitter                  | VCV000844133 | 20               | 63419634       | 844133      | 848531      | rs1601590761 | LOF        | 0.719    | 0.067        | 0.214    |
| KCNQ2 | 430 | P   | S   | NM_172107.4(KCNQ2):c.1288C>T (p.Pro430Ser) | Benign familial neonatal seizures 1                                                                                      | Pathogenic(Last reviewed: Mar 31, 2016)                                   | no assertion criteria provided                       | VCV000021761 | 20               | 63419632       | 21761       | 34613       | rs118192224  | LOF        | 0.781    | 0.084        | 0.135    |

| gene  | pos | aa1 | aa2 | Name                                       | Condition(s)                                                                                         | Clinical significance (Last reviewed)                                     | Review status                                        | Accession    | GRCh38Chromosome | GRCh38Location | VariationID | AlleleID(s) | dbSNP ID     | prediction | prob.LOF | prob.Neutral | prob.GOF |
|-------|-----|-----|-----|--------------------------------------------|------------------------------------------------------------------------------------------------------|---------------------------------------------------------------------------|------------------------------------------------------|--------------|------------------|----------------|-------------|-------------|--------------|------------|----------|--------------|----------|
| KCNQ2 | 432 | A   | T   | NM_172107.4(KCNQ2):c.1378G>A (p.Ala460Thr) | Early infantile epileptic encephalopathy with suppression bursts                                     | Uncertain significance(Last reviewed: Oct 3, 2020)                        | criteria provided, single submitter                  | VCV000937790 | 20               | 63415050       | 937790      | 939028      | rs1284566908 | LOF        | 0.767    | 0.077        | 0.156    |
| KCNQ2 | 432 | R   | C   | NM_172107.4(KCNQ2):c.1294C>T (p.Arg432Cys) | Early infantile epileptic encephalopathy with suppression bursts                                     | Uncertain significance(Last reviewed: Oct 24, 2020)                       | criteria provided, single submitter                  | VCV000575399 | 20               | 63419626       | 575399      | 572959      | rs368720575  | LOF        | 0.776    | 0.085        | 0.138    |
| KCNQ2 | 432 | R   | H   | NM_172107.4(KCNQ2):c.1295G>A (p.Arg432His) | Early infantile epileptic encephalopathy with suppression bursts not provided                        | Conflicting interpretations of pathogenicity(Last reviewed: Sep 24, 2019) | criteria provided, conflicting interpretations       | VCV000424483 | 20               | 63419625       | 424483      | 410820      | rs758074713  | LOF        | 0.802    | 0.078        | 0.119    |
| KCNQ2 | 434 | S   | N   | NM_172107.4(KCNQ2):c.1301G>A (p.Ser434Asn) | not provided                                                                                         | Uncertain significance(Last reviewed: Jan 23, 2020)                       | criteria provided, single submitter                  | VCV001312018 | 20               | 63419619       | 1312018     | 1302549     | NA           | LOF        | 0.859    | 0.05         | 0.092    |
| KCNQ2 | 435 | R   | Q   | NM_172107.4(KCNQ2):c.1394G>A (p.Arg465Gln) | Early infantile epileptic encephalopathy with suppression bursts                                     | Uncertain significance(Last reviewed: Feb 22, 2019)                       | criteria provided, single submitter                  | VCV000861986 | 20               | 63415034       | 861986      | 848529      | rs1459078042 | LOF        | 0.865    | 0.044        | 0.09     |
| KCNQ2 | 440 | D   | H   | NM_172107.4(KCNQ2):c.1408G>C (p.Asp470His) | Early infantile epileptic encephalopathy with suppression bursts                                     | Uncertain significance(Last reviewed: Aug 8, 2019)                        | criteria provided, single submitter                  | VCV000936153 | 20               | 63415020       | 936153      | 939027      | rs751907059  | LOF        | 0.834    | 0.065        | 0.101    |
| KCNQ2 | 440 | D   | N   | NM_172107.4(KCNQ2):c.1408G>A (p.Asp470Asn) | not provided                                                                                         | Uncertain significance(Last reviewed: Aug 22, 2019)                       | criteria provided, single submitter                  | VCV001212149 | 20               | 63415020       | 1212149     | 1202144     | NA           | LOF        | 0.833    | 0.07         | 0.097    |
| KCNQ2 | 442 | R   | C   | NM_172107.4(KCNQ2):c.1324C>T (p.Arg442Cys) | Early infantile epileptic encephalopathy with suppression bursts                                     | Uncertain significance(Last reviewed: Jun 30, 2017)                       | criteria provided, single submitter                  | VCV000461407 | 20               | 63415104       | 461407      | 470485      | rs1354411692 | LOF        | 0.826    | 0.055        | 0.119    |
| KCNQ2 | 443 | Q   | H   | NM_172107.4(KCNQ2):c.1383G>T (p.Gln461His) | Early infantile epileptic encephalopathy with suppression bursts                                     | Uncertain significance(Last reviewed: Oct 25, 2020)                       | criteria provided, single submitter                  | VCV000842741 | 20               | 63415045       | 842741      | 848530      | rs1349137821 | LOF        | 0.853    | 0.046        | 0.101    |
| KCNQ2 | 450 | V   | M   | NM_172107.4(KCNQ2):c.1348G>A (p.Val450Met) | not provided Seizures Early infantile epileptic encephalopathy with suppression bursts not specified | Benign/Likely benign(Last reviewed: Oct 11, 2021)                         | criteria provided, multiple submitters, no conflicts | VCV000129332 | 20               | 63415080       | 129332      | 134778      | rs146492238  | GOF        | 0.698    | 0.056        | 0.246    |
| KCNQ2 | 459 | R   | G   | NM_172107.4(KCNQ2):c.1465G>G (p.Arg489Gly) | Early infantile epileptic encephalopathy with suppression bursts                                     | Uncertain significance(Last reviewed: Feb 21, 2020)                       | criteria provided, single submitter                  | VCV001020383 | 20               | 63414963       | 1020383     | 1014206     | rs775387876  | LOF        | 0.816    | 0.076        | 0.107    |
| KCNQ2 | 461 | Q   | P   | NM_172107.4(KCNQ2):c.1382A>C (p.Gln461Pro) | Early infantile epileptic encephalopathy 7                                                           | Pathogenic(Last reviewed: Mar 31, 2016)                                   | no assertion criteria provided                       | VCV000369794 | 20               | 63415046       | 369794      | 353986      | rs1057516116 | LOF        | 0.799    | 0.074        | 0.127    |
| KCNQ2 | 465 | A   | P   | NM_172107.4(KCNQ2):c.1483G>C (p.Ala495Pro) | Early infantile epileptic encephalopathy with suppression bursts                                     | Uncertain significance(Last reviewed: Jun 22, 2020)                       | criteria provided, single submitter                  | VCV001015967 | 20               | 63414945       | 1015967     | 1014205     | rs200251507  | LOF        | 0.798    | 0.07         | 0.133    |
| KCNQ2 | 469 | A   | T   | NM_172107.4(KCNQ2):c.1405G>A (p.Ala469Thr) | not provided                                                                                         | Conflicting interpretations of pathogenicity(Last reviewed: Mar 1, 2020)  | criteria provided, conflicting interpretations       | VCV000205905 | 20               | 63415023       | 205905      | 203737      | rs781778855  | LOF        | 0.756    | 0.06         | 0.185    |
| KCNQ2 | 469 | R   | C   | NM_172107.4(KCNQ2):c.1489C>T (p.Arg497Cys) | Early infantile epileptic encephalopathy with suppression bursts                                     | Uncertain significance(Last reviewed: Mar 15, 2019)                       | criteria provided, single submitter                  | VCV000840173 | 20               | 63414939       | 840173      | 848527      | rs540461827  | LOF        | 0.772    | 0.069        | 0.159    |

| gene  | pos | aa1 | aa2 | Name                                                 | Condition(s)                                                                                                                                                 | Clinical significance (Last reviewed)                                     | Review status                                        | Accession    | GRCh38Chromosome | GRCh38Location      | VariationID | AlleleID(s) | dbSNP ID     | prediction | prob.LOF | prob.Neutral | prob.GOF |
|-------|-----|-----|-----|------------------------------------------------------|--------------------------------------------------------------------------------------------------------------------------------------------------------------|---------------------------------------------------------------------------|------------------------------------------------------|--------------|------------------|---------------------|-------------|-------------|--------------|------------|----------|--------------|----------|
| KCNQ2 | 470 | I   | V   | NM_172107.4(KCNQ2):c.1492A>G (p.Ile498Val)           | Early infantile epileptic encephalopathy with suppression bursts                                                                                             | Uncertain significance(Last reviewed: Aug 24, 2018)                       | criteria provided, single submitter                  | VCV000644498 | 20               | 63414936            | 644498      | 650430      | rs1601572937 | LOF        | 0.745    | 0.063        | 0.192    |
| KCNQ2 | 471 | A   | V   | NM_172107.4(KCNQ2):c.1502_1503delinsTG (p.Ala501Val) | Early infantile epileptic encephalopathy with suppression bursts                                                                                             | Uncertain significance(Last reviewed: Feb 22, 2019)                       | criteria provided, single submitter                  | VCV000851545 | 20               | 63414925 - 63414926 | 851545      | 848526      | rs2080237716 | LOF        | 0.727    | 0.061        | 0.212    |
| KCNQ2 | 471 | A   | V   | NM_172107.4(KCNQ2):c.1502_1503delinsTG (p.Ala501Val) | Early infantile epileptic encephalopathy with suppression bursts                                                                                             | Uncertain significance(Last reviewed: Feb 22, 2019)                       | criteria provided, single submitter                  | VCV000851545 | 20               | 63414925 - 63414926 | 851545      | 848526      | rs2080237716 | LOF        | 0.727    | 0.061        | 0.212    |
| KCNQ2 | 471 | A   | V   | NM_172107.4(KCNQ2):c.1502C>T (p.Ala501Val)           | not provided                                                                                                                                                 | Uncertain significance                                                    | no assertion criteria provided                       | VCV001049677 | 20               | 63414926            | 1049677     | 1038782     | NA           | LOF        | 0.727    | 0.061        | 0.212    |
| KCNQ2 | 471 | A   | V   | NM_172107.4(KCNQ2):c.1502C>T (p.Ala501Val)           | not provided                                                                                                                                                 | Uncertain significance                                                    | no assertion criteria provided                       | VCV001049677 | 20               | 63414926            | 1049677     | 1038782     | NA           | LOF        | 0.727    | 0.061        | 0.212    |
| KCNQ2 | 472 | A   | T   | NM_172107.4(KCNQ2):c.1504G>A (p.Ala502Thr)           | Early infantile epileptic encephalopathy with suppression bursts                                                                                             | Uncertain significance(Last reviewed: Nov 17, 2019)                       | criteria provided, single submitter                  | VCV000855445 | 20               | 63414924            | 855445      | 848525      | rs540103798  | LOF        | 0.781    | 0.058        | 0.16     |
| KCNQ2 | 473 | R   | W   | NM_172107.4(KCNQ2):c.1471C>T (p.Arg491Trp)           | Early infantile epileptic encephalopathy with suppression bursts                                                                                             | Uncertain significance(Last reviewed: Feb 19, 2019)                       | criteria provided, single submitter                  | VCV000847091 | 20               | 63414957            | 847091      | 848528      | rs1251584590 | LOF        | 0.801    | 0.064        | 0.135    |
| KCNQ2 | 493 | R   | C   | NM_172107.4(KCNQ2):c.1477C>T (p.Arg493Cys)           | not provided                                                                                                                                                 | Uncertain significance(Last reviewed: Mar 20, 2017)                       | criteria provided, single submitter                  | VCV000424395 | 20               | 63414951            | 424395      | 410819      | rs759338332  | LOF        | 0.83     | 0.047        | 0.123    |
| KCNQ2 | 497 | R   | H   | NM_172107.4(KCNQ2):c.1490G>A (p.Arg497His)           | not provided Early infantile epileptic encephalopathy with suppression bursts                                                                                | Uncertain significance(Last reviewed: Aug 23, 2019)                       | criteria provided, multiple submitters, no conflicts | VCV000530434 | 20               | 63414938            | 530434      | 533616      | rs769414365  | LOF        | 0.867    | 0.042        | 0.091    |
| KCNQ2 | 501 | A   | P   | NM_172107.4(KCNQ2):c.1501G>C (p.Ala501Pro)           | Early infantile epileptic encephalopathy 7                                                                                                                   | Pathogenic(Last reviewed: Mar 31, 2016)                                   | no assertion criteria provided                       | VCV000369797 | 20               | 63414927            | 369797      | 353984      | rs1057516118 | LOF        | 0.781    | 0.056        | 0.163    |
| KCNQ2 | 502 | A   | S   | NM_172107.4(KCNQ2):c.1504G>T (p.Ala502Ser)           | Early infantile epileptic encephalopathy with suppression bursts                                                                                             | Uncertain significance(Last reviewed: Nov 19, 2017)                       | criteria provided, single submitter                  | VCV000530467 | 20               | 63414924            | 530467      | 533677      | rs540103798  | LOF        | 0.763    | 0.047        | 0.189    |
| KCNQ2 | 502 | A   | V   | NM_172107.4(KCNQ2):c.1505C>T (p.Ala502Val)           | Early infantile epileptic encephalopathy with suppression bursts not provided Benign familial neonatal seizures 1 Early infantile epileptic encephalopathy 7 | Conflicting interpretations of pathogenicity(Last reviewed: Aug 31, 2020) | criteria provided, conflicting interpretations       | VCV000205906 | 20               | 63414923            | 205906      | 203736      | rs375264483  | GOF        | 0.684    | 0.047        | 0.269    |
| KCNQ2 | 507 | V   | I   | NM_172107.4(KCNQ2):c.1612G>A (p.Val538Ile)           | not provided                                                                                                                                                 | Uncertain significance(Last reviewed: Oct 2, 2019)                        | criteria provided, single submitter                  | VCV001218158 | 20               | 63414107            | 1218158     | 1208140     | NA           | LOF        | 0.726    | 0.055        | 0.219    |
| KCNQ2 | 509 | I   | V   | NM_172107.4(KCNQ2):c.1618A>G (p.Ile540Val)           | Early infantile epileptic encephalopathy with suppression bursts                                                                                             | Likely pathogenic(Last reviewed: Sep 20, 2020)                            | criteria provided, single submitter                  | VCV001067283 | 20               | 63414101            | 1067283     | 1056619     | NA           | LOF        | 0.751    | 0.057        | 0.192    |
| KCNQ2 | 512 | I   | S   | NM_172107.4(KCNQ2):c.1619T>G (p.Ile540Ser)           | Early infantile epileptic encephalopathy with suppression bursts                                                                                             | Likely pathogenic(Last reviewed: Jul 5, 2019)                             | criteria provided, single submitter                  | VCV000947411 | 20               | 63414100            | 947411      | 929237      | rs2080210194 | LOF        | 0.713    | 0.063        | 0.224    |
| KCNQ2 | 513 | C   | R   | NM_172107.4(KCNQ2):c.1630T>C (p.Cys544Arg)           | Early infantile epileptic encephalopathy with suppression bursts                                                                                             | Uncertain significance(Last reviewed: Oct 9, 2020)                        | criteria provided, single submitter                  | VCV001036550 | 20               | 63414089            | 1036550     | 1034794     | rs118192232  | LOF        | 0.81     | 0.073        | 0.117    |



| gene  | pos | aa1 | aa2 | Name                                       | Condition(s)                                                                                                                             | Clinical significance (Last reviewed)                                     | Review status                                        | Accession    | GRCh38Chromosome | GRCh38Location | VariationID | AlleleID(s) | dbSNP ID     | prediction | prob.LOF | prob.Neutral | prob.GOF |
|-------|-----|-----|-----|--------------------------------------------|------------------------------------------------------------------------------------------------------------------------------------------|---------------------------------------------------------------------------|------------------------------------------------------|--------------|------------------|----------------|-------------|-------------|--------------|------------|----------|--------------|----------|
| KCNQ2 | 514 | G   | E   | NM_172107.4(KCNQ2):c.1541G>A (p.Gly514Glu) | not provided                                                                                                                             | Uncertain significance(Last reviewed: Aug 1, 2017)                        | criteria provided, single submitter                  | VCV000450825 | 20               | 63414178       | 450825      | 446284      | rs1358495877 | LOF        | 0.822    | 0.073        | 0.104    |
| KCNQ2 | 514 | G   | R   | NM_172107.4(KCNQ2):c.1540G>A (p.Gly514Arg) | not provided                                                                                                                             | Uncertain significance(Last reviewed: Nov 15, 2018)                       | criteria provided, single submitter                  | VCV000205948 | 20               | 63414179       | 205948      | 203735      | rs772669887  | LOF        | 0.817    | 0.074        | 0.108    |
| KCNQ2 | 515 | E   | D   | NM_172107.4(KCNQ2):c.1545G>T (p.Glu515Asp) | not specified Early infantile epileptic encephalopathy with suppression bursts not provided                                              | Conflicting interpretations of pathogenicity(Last reviewed: Feb 6, 2020)  | criteria provided, conflicting interpretations       | VCV000445484 | 20               | 63414174       | 445484      | 438756      | rs117067974  | LOF        | 0.85     | 0.062        | 0.088    |
| KCNQ2 | 515 | E   | D   | NM_172107.4(KCNQ2):c.1545G>T (p.Glu515Asp) | not specified Early infantile epileptic encephalopathy with suppression bursts not provided                                              | Conflicting interpretations of pathogenicity(Last reviewed: Feb 6, 2020)  | criteria provided, conflicting interpretations       | VCV000445484 | 20               | 63414174       | 445484      | 438756      | rs117067974  | LOF        | 0.85     | 0.062        | 0.088    |
| KCNQ2 | 515 | E   | D   | NM_172107.4(KCNQ2):c.1545G>C (p.Glu515Asp) | Early infantile epileptic encephalopathy with suppression bursts Seizures not specified not provided Benign familial neonatal seizures 1 | Conflicting interpretations of pathogenicity(Last reviewed: Aug 30, 2021) | criteria provided, conflicting interpretations       | VCV000021764 | 20               | 63414174       | 21764       | 34616       | rs117067974  | LOF        | 0.85     | 0.062        | 0.088    |
| KCNQ2 | 515 | E   | D   | NM_172107.4(KCNQ2):c.1545G>C (p.Glu515Asp) | Early infantile epileptic encephalopathy with suppression bursts Seizures not specified not provided Benign familial neonatal seizures 1 | Conflicting interpretations of pathogenicity(Last reviewed: Aug 30, 2021) | criteria provided, conflicting interpretations       | VCV000021764 | 20               | 63414174       | 21764       | 34616       | rs117067974  | LOF        | 0.85     | 0.062        | 0.088    |
| KCNQ2 | 518 | M   | I   | NM_172107.4(KCNQ2):c.1638G>A (p.Met546Ile) | Benign familial neonatal seizures 1 Early infantile epileptic encephalopathy with suppression bursts                                     | Uncertain significance(Last reviewed: Jun 15, 2019)                       | criteria provided, single submitter                  | VCV000934692 | 20               | 63413575       | 934692      | 939025      | rs2080191127 | GOF        | 0.66     | 0.052        | 0.288    |
| KCNQ2 | 520 | S   | P   | NM_172107.4(KCNQ2):c.1651T>C (p.Ser551Pro) | Early infantile epileptic encephalopathy with suppression bursts                                                                         | Uncertain significance(Last reviewed: Jun 25, 2020)                       | criteria provided, single submitter                  | VCV001034586 | 20               | 63413562       | 1034586     | 1034793     | rs2080190604 | LOF        | 0.855    | 0.052        | 0.093    |
| KCNQ2 | 521 | K   | R   | NM_172107.4(KCNQ2):c.1655A>G (p.Lys552Arg) | Early infantile epileptic encephalopathy with suppression bursts                                                                         | Uncertain significance(Last reviewed: Aug 6, 2018)                        | criteria provided, single submitter                  | VCV000642572 | 20               | 63413558       | 642572      | 650433      | rs1555853613 | LOF        | 0.864    | 0.053        | 0.084    |
| KCNQ2 | 524 | F   | I   | NM_172107.4(KCNQ2):c.1663T>A (p.Phe555Ile) | Benign familial neonatal seizures 1 Early infantile epileptic encephalopathy 7                                                           | Likely pathogenic(Last reviewed: Nov 1, 2021)                             | criteria provided, single submitter                  | VCV001326319 | 20               | 63413550       | 1326319     | 1316721     | NA           | GOF        | 0.623    | 0.047        | 0.33     |
| KCNQ2 | 525 | C   | S   | NM_172107.4(KCNQ2):c.1573T>A (p.Cys525Ser) | Early infantile epileptic encephalopathy with suppression bursts not provided                                                            | Uncertain significance(Last reviewed: Dec 3, 2018)                        | criteria provided, multiple submitters, no conflicts | VCV000205907 | 20               | 63414146       | 205907      | 203734      | rs371162714  | LOF        | 0.77     | 0.05         | 0.18     |
| KCNQ2 | 526 | K   | N   | NM_172107.4(KCNQ2):c.1662G>T (p.Lys554Asn) | Early infantile epileptic encephalopathy 7  Benign familial neonatal seizures 2 Benign familial neonatal seizures 1                      | Pathogenic(Last reviewed: Mar 31, 2016)                                   | no assertion criteria provided                       | VCV000007388 | 20               | 63413551       | 7388        | 22427       | rs267607198  | LOF        | 0.861    | 0.039        | 0.099    |
| KCNQ2 | 530 | E   | K   | NM_172107.4(KCNQ2):c.1588G>A (p.Glu530Lys) | Early infantile epileptic encephalopathy with suppression bursts Early infantile epileptic encephalopathy 7                              | Conflicting interpretations of pathogenicity(Last reviewed: Aug 20, 2020) | criteria provided, conflicting interpretations       | VCV000495266 | 20               | 63414131       | 495266      | 486771      | rs897976020  | LOF        | 0.816    | 0.095        | 0.089    |
| KCNQ2 | 530 | P   | S   | NM_172107.4(KCNQ2):c.1681C>T (p.Pro561Ser) | KCNQ2-Related Disorders                                                                                                                  | Pathogenic(Last reviewed: May 14, 2020)                                   | criteria provided, single submitter                  | VCV001301899 | 20               | 63413532       | 1301899     | 1292181     | NA           | LOF        | 0.813    | 0.094        | 0.094    |
| KCNQ2 | 530 | S   | N   | NM_172107.4(KCNQ2):c.1673G>A (p.Ser558Asn) | Early infantile epileptic encephalopathy with suppression bursts                                                                         | Uncertain significance(Last reviewed: Aug 1, 2017)                        | criteria provided, single submitter                  | VCV000660856 | 20               | 63413540       | 660856      | 650434      | rs1601566660 | LOF        | 0.819    | 0.092        | 0.089    |

| gene  | pos | aa1 | aa2 | Name                                       | Condition(s)                                                                                                                                                                                                                                         | Clinical significance (Last reviewed)                                     | Review status                                        | Accession    | GRCh38Chromosome | GRCh38Location | VariationID | AlleleID(s) | dbSNP ID     | prediction | prob.LOF | prob.Neutral | prob.GOF |
|-------|-----|-----|-----|--------------------------------------------|------------------------------------------------------------------------------------------------------------------------------------------------------------------------------------------------------------------------------------------------------|---------------------------------------------------------------------------|------------------------------------------------------|--------------|------------------|----------------|-------------|-------------|--------------|------------|----------|--------------|----------|
|       |     |     |     |                                            |                                                                                                                                                                                                                                                      | reviewed: Sep 13, 2018)                                                   | submitter                                            |              |                  |                |             |             |              |            |          |              |          |
| KCNQ2 | 531 | D   | V   | NM_172107.4(KCNQ2):c.1592A>T (p.Asp531Val) | Early infantile epileptic encephalopathy with suppression bursts                                                                                                                                                                                     | Uncertain significance(Last reviewed: Nov 10, 2017)                       | criteria provided, single submitter                  | VCV000530537 | 20               | 63414127       | 530537      | 534194      | rs1555854018 | LOF        | 0.81     | 0.093        | 0.097    |
| KCNQ2 | 532 | D   | G   | NM_172107.4(KCNQ2):c.1688A>G (p.Asp563Gly) | Early infantile epileptic encephalopathy with suppression bursts                                                                                                                                                                                     | Pathogenic(Last reviewed: Dec 10, 2019)                                   | criteria provided, single submitter                  | VCV000836158 | 20               | 63413525       | 836158      | 848523      | rs2080189052 | LOF        | 0.866    | 0.052        | 0.082    |
| KCNQ2 | 533 | P   | R   | NM_172107.4(KCNQ2):c.1682C>G (p.Pro561Arg) | Early infantile epileptic encephalopathy with suppression bursts                                                                                                                                                                                     | Uncertain significance(Last reviewed: Aug 28, 2019)                       | criteria provided, single submitter                  | VCV000943803 | 20               | 63413531       | 943803      | 939024      | rs796052652  | LOF        | 0.86     | 0.043        | 0.097    |
| KCNQ2 | 534 | M   | I   | NM_172107.4(KCNQ2):c.1695G>A (p.Met565Ile) | not provided                                                                                                                                                                                                                                         | Uncertain significance(Last reviewed: Dec 1, 2020)                        | criteria provided, single submitter                  | VCV001013460 | 20               | 63413518       | 1013460     | 1001175     | rs2080188612 | LOF        | 0.8      | 0.04         | 0.16     |
| KCNQ2 | 536 | V   | I   | NM_172107.4(KCNQ2):c.1699G>A (p.Val567Ile) | not provided                                                                                                                                                                                                                                         | Uncertain significance(Last reviewed: Mar 1, 2021)                        | criteria provided, single submitter                  | VCV001175997 | 20               | 63413514       | 1175997     | 1166353     | NA           | GOF        | 0.716    | 0.038        | 0.246    |
| KCNQ2 | 541 | R   | G   | NM_172107.4(KCNQ2):c.1621A>G (p.Arg541Gly) | Early infantile epileptic encephalopathy 7                                                                                                                                                                                                           | Pathogenic(Last reviewed: Mar 31, 2016)                                   | no assertion criteria provided                       | VCV000369800 | 20               | 63414098       | 369800      | 353981      | rs1555853971 | LOF        | 0.848    | 0.052        | 0.1      |
| KCNQ2 | 541 | R   | T   | NM_172107.4(KCNQ2):c.1622G>C (p.Arg541Thr) | Benign familial neonatal seizures 1 Early infantile epileptic encephalopathy with suppression bursts                                                                                                                                                 | Conflicting interpretations of pathogenicity(Last reviewed: Mar 11, 2020) | criteria provided, conflicting interpretations       | VCV000488537 | 20               | 63414097       | 488537      | 481405      | rs1555853970 | LOF        | 0.849    | 0.036        | 0.115    |
| KCNQ2 | 542 | A   | V   | NM_172107.4(KCNQ2):c.1625C>T (p.Ala542Val) | not provided                                                                                                                                                                                                                                         | Uncertain significance(Last reviewed: Jan 17, 2015)                       | criteria provided, single submitter                  | VCV000205949 | 20               | 63414094       | 205949      | 203732      | rs796052648  | LOF        | 0.871    | 0.046        | 0.082    |
| KCNQ2 | 543 | G   | S   | NM_172107.4(KCNQ2):c.1720G>A (p.Gly574Ser) | Early infantile epileptic encephalopathy with suppression bursts                                                                                                                                                                                     | Uncertain significance(Last reviewed: May 14, 2020)                       | criteria provided, single submitter                  | VCV001022468 | 20               | 63413493       | 1022468     | 1014204     | rs2080187424 | LOF        | 0.86     | 0.06         | 0.08     |
| KCNQ2 | 543 | V   | M   | NM_172107.4(KCNQ2):c.1627G>A (p.Val543Met) | Early infantile epileptic encephalopathy 7 not provided Early infantile epileptic encephalopathy with suppression bursts Benign familial neonatal seizures 1 Early infantile epileptic encephalopathy 7 Benign familial neonatal seizures 1 Seizures | Conflicting interpretations of pathogenicity(Last reviewed: Sep 1, 2020)  | criteria provided, conflicting interpretations       | VCV000194446 | 20               | 63414092       | 194446      | 191609      | rs794727134  | LOF        | 0.859    | 0.037        | 0.104    |
| KCNQ2 | 544 | C   | Y   | NM_172107.4(KCNQ2):c.1631G>A (p.Cys544Tyr) | not provided                                                                                                                                                                                                                                         | Likely pathogenic(Last reviewed: Nov 28, 2016)                            | criteria provided, single submitter                  | VCV000373576 | 20               | 63414088       | 373576      | 360583      | rs1057518492 | LOF        | 0.867    | 0.041        | 0.092    |
| KCNQ2 | 545 | V   | I   | NM_172107.4(KCNQ2):c.1633G>A (p.Val545Ile) | not provided Early infantile epileptic encephalopathy with suppression bursts                                                                                                                                                                        | Uncertain significance(Last reviewed: Aug 25, 2019)                       | criteria provided, multiple submitters, no conflicts | VCV000205911 | 20               | 63413580       | 205911      | 203730      | rs757608181  | LOF        | 0.857    | 0.038        | 0.105    |
| KCNQ2 | 546 | M   | T   | NM_172107.4(KCNQ2):c.1637T>C (p.Met546Thr) | not provided                                                                                                                                                                                                                                         | Pathogenic(Last reviewed: Aug 16, 2016)                                   | criteria provided, single submitter                  | VCV000280703 | 20               | 63413576       | 280703      | 265109      | rs886041860  | LOF        | 0.865    | 0.049        | 0.086    |
| KCNQ2 | 546 | M   | V   | NM_172107.4(KCNQ2):c.1636A>G (p.Met546Val) | Early infantile epileptic encephalopathy 7                                                                                                                                                                                                           | Pathogenic(Last reviewed: Mar 31, 2016)                                   | no assertion criteria provided                       | VCV000039761 | 20               | 63413577       | 39761       | 48360       | rs397515420  | LOF        | 0.87     | 0.04         | 0.09     |
| KCNQ2 | 546 | V   | M   | NM_172107.4(KCNQ2):c.1690G>A (p.Val564Met) | Early infantile epileptic encephalopathy 7                                                                                                                                                                                                           | Likely pathogenic(Last reviewed: Aug 11,                                  | criteria provided, single submitter                  | VCV000813775 | 20               | 63413523       | 813775      | 802033      | NA           | LOF        | 0.86     | 0.036        | 0.104    |

| gene  | pos | aa1 | aa2 | Name                                       | Condition(s)                                                                                                                                                          | Clinical significance (Last reviewed)                                    | Review status                                        | Accession    | GRCh38Chromosome | GRCh38Location | VariationID | AlleleID(s) | dbSNP ID     | prediction | prob.LOF | prob.Neutral | prob.GOF |  |
|-------|-----|-----|-----|--------------------------------------------|-----------------------------------------------------------------------------------------------------------------------------------------------------------------------|--------------------------------------------------------------------------|------------------------------------------------------|--------------|------------------|----------------|-------------|-------------|--------------|------------|----------|--------------|----------|--|
|       |     |     |     |                                            |                                                                                                                                                                       |                                                                          |                                                      |              |                  |                |             |             |              |            |          |              |          |  |
| KCNQ2 | 547 | R   | G   | NM_172107.4(KCNQ2):c.1639C>G (p.Arg547Gly) | Benign familial neonatal seizures 1                                                                                                                                   | Likely pathogenic(Last reviewed: Apr 12, 2016)                           | criteria provided, single submitter                  | VCV000226112 | 20               | 63413574       | 226112      | 227922      | rs796052650  | LOF        | 0.849    | 0.053        | 0.098    |  |
| KCNQ2 | 547 | R   | Q   | NM_172107.4(KCNQ2):c.1640G>A (p.Arg547Gln) | not provided                                                                                                                                                          | Uncertain significance(Last reviewed: May 20, 2021)                      | criteria provided, single submitter                  | VCV000390674 | 20               | 63413573       | 390674      | 379746      | rs760984494  | LOF        | 0.846    | 0.035        | 0.119    |  |
| KCNQ2 | 547 | R   | W   | NM_172107.4(KCNQ2):c.1639C>T (p.Arg547Trp) | Benign familial neonatal seizures 1(not provided)Early infantile epileptic encephalopathy with suppression bursts                                                     | Pathogenic/Likely pathogenic(Last reviewed: Apr 9, 2021)                 | criteria provided, multiple submitters, no conflicts | VCV000205912 | 20               | 63413574       | 205912      | 203729      | rs796052650  | LOF        | 0.866    | 0.033        | 0.101    |  |
| KCNQ2 | 552 | K   | N   | NM_172107.4(KCNQ2):c.1749G>C (p.Lys583Asn) | Early infantile epileptic encephalopathy with suppression bursts Early infantile epileptic encephalopathy 7                                                           | Likely pathogenic(Last reviewed: May 13, 2021)                           | criteria provided, multiple submitters, no conflicts | VCV001068430 | 20               | 63413464       | 1068430     | 1056618     | NA           | LOF        | 0.849    | 0.042        | 0.109    |  |
| KCNQ2 | 552 | K   | T   | NM_172107.4(KCNQ2):c.1655A>C (p.Lys552Thr) | Early infantile epileptic encephalopathy 7                                                                                                                            | Pathogenic(Last reviewed: Mar 31, 2016)                                  | no assertion criteria provided                       | VCV000369804 | 20               | 63413558       | 369804      | 353978      | rs1555853613 | LOF        | 0.863    | 0.037        | 0.1      |  |
| KCNQ2 | 553 | R   | L   | NM_172107.4(KCNQ2):c.1658G>T (p.Arg553Leu) | not provided Early infantile epileptic encephalopathy 7                                                                                                               | Pathogenic(Last reviewed: Nov 8, 2017)                                   | criteria provided, single submitter                  | VCV000369805 | 20               | 63413555       | 369805      | 353977      | rs118192234  | LOF        | 0.884    | 0.029        | 0.087    |  |
| KCNQ2 | 553 | R   | P   | NM_172107.4(KCNQ2):c.1658G>C (p.Arg553Pro) | Benign familial neonatal seizures 1                                                                                                                                   | Likely pathogenic(Last reviewed: Jun 20, 2017)                           | criteria provided, single submitter                  | VCV000560650 | 20               | 63413555       | 560650      | 551748      | rs118192234  | LOF        | 0.876    | 0.039        | 0.084    |  |
| KCNQ2 | 553 | R   | Q   | NM_172107.4(KCNQ2):c.1658G>A (p.Arg553Gln) | not provided Benign familial neonatal seizures 1 Early infantile epileptic encephalopathy with suppression bursts                                                     | Pathogenic(Last reviewed: Feb 18, 2021)                                  | criteria provided, multiple submitters, no conflicts | VCV000021767 | 20               | 63413555       | 21767       | 34619       | rs118192234  | LOF        | 0.867    | 0.032        | 0.101    |  |
| KCNQ2 | 553 | R   | W   | NM_172107.4(KCNQ2):c.1657C>T (p.Arg553Trp) | Early infantile epileptic encephalopathy 7 Early infantile epileptic encephalopathy with suppression bursts Benign familial neonatal seizures 1 Seizures not provided | Conflicting interpretations of pathogenicity(Last reviewed: Aug 1, 2021) | criteria provided, conflicting interpretations       | VCV000205913 | 20               | 63413556       | 205913      | 203728      | rs759584387  | LOF        | 0.881    | 0.032        | 0.087    |  |
| KCNQ2 | 555 | F   | L   | NM_172107.4(KCNQ2):c.1663T>C (p.Phe555Leu) | Benign familial neonatal seizures 1                                                                                                                                   | Likely pathogenic(Last reviewed: Feb 22, 2018)                           | criteria provided, single submitter                  | VCV000813758 | 20               | 63413550       | 813758      | 802034      | NA           | LOF        | 0.875    | 0.035        | 0.09     |  |
| KCNQ2 | 556 | K   | E   | NM_172107.4(KCNQ2):c.1666A>G (p.Lys556Glu) | Early infantile epileptic encephalopathy 7                                                                                                                            | Pathogenic(Last reviewed: Mar 31, 2016)                                  | no assertion criteria provided                       | VCV000205914 | 20               | 63413547       | 205914      | 203727      | rs1555853593 | LOF        | 0.88     | 0.039        | 0.081    |  |
| KCNQ2 | 557 | L   | P   | NM_172107.4(KCNQ2):c.1754T>C (p.Leu585Pro) | Early infantile epileptic encephalopathy with suppression bursts                                                                                                      | Uncertain significance(Last reviewed: Apr 18, 2019)                      | criteria provided, single submitter                  | VCV000843962 | 20               | 63413459       | 843962      | 848521      | rs2080185796 | LOF        | 0.877    | 0.053        | 0.07     |  |
| KCNQ2 | 559 | D   | A   | NM_172107.4(KCNQ2):c.1769A>C (p.Asp590Ala) | not provided                                                                                                                                                          | Uncertain significance(Last reviewed: May 31, 2019)                      | criteria provided, single submitter                  | VCV001306160 | 20               | 63408531       | 1306160     | 1297431     | NA           | LOF        | 0.886    | 0.041        | 0.073    |  |
| KCNQ2 | 560 | R   | Q   | NM_172107.4(KCNQ2):c.1679G>A (p.Arg560Gln) | not provided Early infantile epileptic encephalopathy with suppression bursts                                                                                         | Likely pathogenic(Last reviewed: Aug 20, 2020)                           | criteria provided, multiple submitters, no conflicts | VCV000372677 | 20               | 63413534       | 372677      | 360435      | rs1057517919 | LOF        | 0.845    | 0.071        | 0.084    |  |
| KCNQ2 | 560 | R   | W   | NM_172107.4(KCNQ2):c.1678C>T (p.Arg560Trp) | Early infantile epileptic encephalopathy with suppression bursts(not provided) Early infantile                                                                        | Pathogenic/Likely pathogenic(Last reviewed: Apr 12, 2016)                | criteria provided, single submitter                  | VCV000205915 | 20               | 63413535       | 205915      | 203726      | rs773171451  | LOF        | 0.835    | 0.076        | 0.089    |  |

| gene  | pos | aa1 | aa2 | Name                                       | Condition(s)                                                                                                                                                                                                     | Clinical significance (Last reviewed)                                     | Review status                                        | Accession    | GRCh38Chromosome | GRCh38Location | VariationID | AlleleID(s) | dbSNP ID     | prediction | prob.LOF | prob.Neutral | prob.GOF |  |
|-------|-----|-----|-----|--------------------------------------------|------------------------------------------------------------------------------------------------------------------------------------------------------------------------------------------------------------------|---------------------------------------------------------------------------|------------------------------------------------------|--------------|------------------|----------------|-------------|-------------|--------------|------------|----------|--------------|----------|--|
|       |     |     |     |                                            | epileptic encephalopathy 7 Absent speech Limb dystonia Global developmental delay Neurodevelopmental disorder                                                                                                    | reviewed: Oct 26, 2021)                                                   | multiple submitters, no conflicts                    |              |                  |                |             |             |              |            |          |              |          |  |
| KCNQ2 | 561 | P   | L   | NM_172107.4(KCNQ2):c.1682C>T (p.Pro561Leu) | not provided Early infantile epileptic encephalopathy 7                                                                                                                                                          | Pathogenic(Last reviewed: Dec 18, 2018)                                   | criteria provided, single submitter                  | VCV000205916 | 20               | 63413531       | 205916      | 203725      | rs796052652  | LOF        | 0.882    | 0.038        | 0.079    |  |
| KCNQ2 | 563 | D   | E   | NM_172107.4(KCNQ2):c.1689C>G (p.Asp563Glu) | Early infantile epileptic encephalopathy 7                                                                                                                                                                       | Pathogenic(Last reviewed: Mar 31, 2016)                                   | no assertion criteria provided                       | VCV000369806 | 20               | 63413524       | 369806      | 353976      | rs35450031   | LOF        | 0.869    | 0.047        | 0.084    |  |
| KCNQ2 | 563 | D   | N   | NM_172107.4(KCNQ2):c.1687G>A (p.Asp563Asn) | Seizures Early infantile epileptic encephalopathy with suppression bursts not provided Early infantile epileptic encephalopathy 7 Benign familial neonatal seizures 1 Early infantile epileptic encephalopathy 7 | Pathogenic(Last reviewed: Sep 15, 2020)                                   | criteria provided, multiple submitters, no conflicts | VCV000205917 | 20               | 63413526       | 205917      | 203724      | rs796052653  | LOF        | 0.863    | 0.051        | 0.086    |  |
| KCNQ2 | 563 | D   | Y   | NM_172107.4(KCNQ2):c.1687G>T (p.Asp563Tyr) | not provided                                                                                                                                                                                                     | Pathogenic(Last reviewed: Jan 20, 2021)                                   | criteria provided, single submitter                  | VCV000429424 | 20               | 63413526       | 429424      | 422338      | rs796052653  | LOF        | 0.881    | 0.04         | 0.08     |  |
| KCNQ2 | 563 | R   | P   | NM_172107.4(KCNQ2):c.1742G>C (p.Arg581Pro) | not provided Early infantile epileptic encephalopathy with suppression bursts                                                                                                                                    | Conflicting interpretations of pathogenicity(Last reviewed: Jun 15, 2020) | criteria provided, conflicting interpretations       | VCV000804957 | 20               | 63413471       | 804957      | 793850      | rs118192235  | LOF        | 0.882    | 0.041        | 0.077    |  |
| KCNQ2 | 565 | V   | M   | NM_172107.4(KCNQ2):c.1777G>A (p.Val593Met) | Early infantile epileptic encephalopathy with suppression bursts                                                                                                                                                 | Uncertain significance(Last reviewed: Feb 21, 2020)                       | criteria provided, single submitter                  | VCV000934644 | 20               | 63408523       | 934644      | 939023      | rs372976131  | LOF        | 0.863    | 0.036        | 0.1      |  |
| KCNQ2 | 567 | V   | D   | NM_172107.4(KCNQ2):c.1700T>A (p.Val567Asp) | not provided                                                                                                                                                                                                     | Pathogenic(Last reviewed: Sep 14, 2020)                                   | criteria provided, single submitter                  | VCV000429666 | 20               | 63413513       | 429666      | 422337      | rs1131691518 | LOF        | 0.868    | 0.052        | 0.08     |  |
| KCNQ2 | 573 | M   | R   | NM_172107.4(KCNQ2):c.1763+1576T>G          | Early infantile epileptic encephalopathy 7                                                                                                                                                                       | Uncertain significance(Last reviewed: May 12, 2020)                       | criteria provided, single submitter                  | VCV001098634 | 20               | 63411874       | 1098634     | 1087405     | NA           | LOF        | 0.88     | 0.041        | 0.079    |  |
| KCNQ2 | 574 | G   | D   | NM_172107.4(KCNQ2):c.1721G>A (p.Gly574Asp) | Early infantile epileptic encephalopathy 7                                                                                                                                                                       | Likely pathogenic(Last reviewed: Feb 19, 2020)                            | no assertion criteria provided                       | VCV000205918 | 20               | 63413492       | 205918      | 203723      | rs796052654  | LOF        | 0.849    | 0.066        | 0.085    |  |
| KCNQ2 | 578 | M   | I   | NM_172107.4(KCNQ2):c.1734G>C (p.Met578Ile) | Early infantile epileptic encephalopathy 7 not provided                                                                                                                                                          | Pathogenic(Last reviewed: Jul 30, 2020)                                   | criteria provided, single submitter                  | VCV000205919 | 20               | 63413479       | 205919      | 203722      | rs796052655  | LOF        | 0.867    | 0.042        | 0.091    |  |
| KCNQ2 | 578 | M   | T   | NM_172107.4(KCNQ2):c.1733T>C (p.Met578Thr) | not provided                                                                                                                                                                                                     | Likely pathogenic(Last reviewed: Sep 19, 2017)                            | criteria provided, single submitter                  | VCV000452187 | 20               | 63413480       | 452187      | 446282      | rs1555853524 | LOF        | 0.876    | 0.046        | 0.078    |  |
| KCNQ2 | 578 | M   | V   | NM_172107.4(KCNQ2):c.1732A>G (p.Met578Val) | not provided Benign familial neonatal seizures 1                                                                                                                                                                 | Likely pathogenic(Last reviewed: Jan 15, 2019)                            | criteria provided, single submitter                  | VCV000369807 | 20               | 63413481       | 369807      | 353975      | rs1057516123 | LOF        | 0.87     | 0.042        | 0.088    |  |
| KCNQ2 | 579 | E   | K   | NM_172107.4(KCNQ2):c.1828G>A (p.Glu610Lys) | Early infantile epileptic encephalopathy 7                                                                                                                                                                       | Uncertain significance(Last reviewed: Apr 30, 2019)                       | criteria provided, single submitter                  | VCV000930863 | 20               | 63408472       | 930863      | 919925      | rs1350422852 | LOF        | 0.876    | 0.042        | 0.082    |  |
| KCNQ2 | 579 | E   | Q   | NM_172107.4(KCNQ2):c.1828G>C (p.Glu610Gln) | Early infantile epileptic encephalopathy with suppression bursts                                                                                                                                                 | Uncertain significance(Last reviewed: Aug 25, 2020)                       | criteria provided, single submitter                  | VCV001006547 | 20               | 63408472       | 1006547     | 999079      | rs1350422852 | LOF        | 0.87     | 0.045        | 0.086    |  |
| KCNQ2 | 580 | P   | L   | NM_172107.4(KCNQ2):c.1823C>T (p.Pro608Leu) | Early infantile epileptic encephalopathy with suppression bursts                                                                                                                                                 | Uncertain significance(Last reviewed: Mar 30, 2019)                       | criteria provided, single submitter                  | VCV000844345 | 20               | 63408477       | 844345      | 848520      | rs140217688  | LOF        | 0.876    | 0.039        | 0.085    |  |

| gene  | pos | aa1 | aa2 | Name                                       | Condition(s)                                                                                                                               | Clinical significance (Last reviewed)                                     | Review status                                        | Accession    | GRCh38Chromosome | GRCh38Location | VariationID | AlleleID(s) | dbSNP ID     | prediction | prob.LOF | prob.Neutral | prob.GOF |
|-------|-----|-----|-----|--------------------------------------------|--------------------------------------------------------------------------------------------------------------------------------------------|---------------------------------------------------------------------------|------------------------------------------------------|--------------|------------------|----------------|-------------|-------------|--------------|------------|----------|--------------|----------|
| KCNQ2 | 581 | R   | G   | NM_172107.4(KCNQ2):c.1741C>G (p.Arg581Gly) | Early infantile epileptic encephalopathy 7 Early infantile epileptic encephalopathy with suppression bursts not provided                   | Pathogenic(Last reviewed: Jul 26, 2019)                                   | criteria provided, multiple submitters, no conflicts | VCV000265380 | 20               | 63413472       | 265380      | 260235      | rs118192236  | LOF        | 0.861    | 0.049        | 0.09     |
| KCNQ2 | 581 | R   | L   | NM_172107.4(KCNQ2):c.1742G>T (p.Arg581Leu) | not provided                                                                                                                               | Likely pathogenic(Last reviewed: Aug 8, 2012)                             | criteria provided, single submitter                  | VCV000205920 | 20               | 63413471       | 205920      | 203720      | rs118192235  | LOF        | 0.881    | 0.029        | 0.09     |
| KCNQ2 | 581 | R   | Q   | NM_172107.4(KCNQ2):c.1742G>A (p.Arg581Gln) | not provided Benign familial neonatal seizures 1 Epileptic encephalopathy Early infantile epileptic encephalopathy with suppression bursts | Pathogenic/Likely pathogenic(Last reviewed: Sep 4, 2020)                  | criteria provided, multiple submitters, no conflicts | VCV000021769 | 20               | 63413471       | 21769       | 34621       | rs118192235  | LOF        | 0.858    | 0.033        | 0.109    |
| KCNQ2 | 586 | Q   | P   | NM_172107.4(KCNQ2):c.1757A>C (p.Gln586Pro) | not provided Early infantile epileptic encephalopathy with suppression bursts                                                              | Uncertain significance(Last reviewed: Jul 31, 2020)                       | criteria provided, multiple submitters, no conflicts | VCV000205921 | 20               | 63413456       | 205921      | 203719      | rs796052656  | LOF        | 0.864    | 0.05         | 0.086    |
| KCNQ2 | 588 | R   | S   | NM_172107.4(KCNQ2):c.1764A>T (p.Arg588Ser) | Benign familial neonatal seizures 1                                                                                                        | Pathogenic(Last reviewed: Mar 31, 2016)                                   | no assertion criteria provided                       | VCV000021770 | 20               | 63408536       | 21770       | 34622       | rs118192237  | LOF        | 0.862    | 0.039        | 0.099    |
| KCNQ2 | 592 | I   | M   | NM_172107.4(KCNQ2):c.1776C>G (p.Ile592Met) | Benign Rolandic epilepsy                                                                                                                   | Pathogenic(Last reviewed: Mar 31, 2016)                                   | no assertion criteria provided                       | VCV000369810 | 20               | 63408524       | 369810      | 353974      | rs201868078  | LOF        | 0.865    | 0.038        | 0.096    |
| KCNQ2 | 595 | R   | W   | NM_172107.4(KCNQ2):c.1783C>T (p.Arg595Trp) | Benign familial neonatal seizures 1 not provided                                                                                           | Uncertain significance(Last reviewed: Jun 24, 2019)                       | criteria provided, single submitter                  | VCV000369811 | 20               | 63408517       | 369811      | 353973      | rs1555851550 | LOF        | 0.849    | 0.06         | 0.091    |
| KCNQ2 | 598 | A   | V   | NM_172107.4(KCNQ2):c.1793C>T (p.Ala598Val) | Early infantile epileptic encephalopathy with suppression bursts not provided                                                              | Uncertain significance(Last reviewed: Jul 14, 2019)                       | criteria provided, multiple submitters, no conflicts | VCV000205922 | 20               | 63408507       | 205922      | 203717      | rs746079131  | LOF        | 0.792    | 0.079        | 0.129    |
| KCNQ2 | 600 | T   | M   | NM_172107.4(KCNQ2):c.1799C>T (p.Thr600Met) | Early infantile epileptic encephalopathy with suppression bursts                                                                           | Uncertain significance(Last reviewed: Oct 8, 2020)                        | criteria provided, single submitter                  | VCV000570302 | 20               | 63408501       | 570302      | 571351      | rs1203090297 | LOF        | 0.778    | 0.102        | 0.12     |
| KCNQ2 | 602 | M   | T   | NM_172107.4(KCNQ2):c.1898T>C (p.Met603Thr) | Early infantile epileptic encephalopathy with suppression bursts                                                                           | Uncertain significance(Last reviewed: Aug 14, 2018)                       | criteria provided, single submitter                  | VCV000646001 | 20               | 63407365       | 646001      | 650443      | rs777332271  | LOF        | 0.821    | 0.08         | 0.098    |
| KCNQ2 | 604 | R   | C   | NM_172107.4(KCNQ2):c.1810C>T (p.Arg604Cys) | Early infantile epileptic encephalopathy with suppression bursts not provided                                                              | Uncertain significance(Last reviewed: Sep 2, 2020)                        | criteria provided, multiple submitters, no conflicts | VCV000205923 | 20               | 63408490       | 205923      | 203716      | rs780942181  | LOF        | 0.809    | 0.086        | 0.105    |
| KCNQ2 | 604 | R   | H   | NM_172107.4(KCNQ2):c.1811G>A (p.Arg604His) | Early infantile epileptic encephalopathy 7 Early infantile epileptic encephalopathy with suppression bursts                                | Uncertain significance(Last reviewed: Aug 20, 2020)                       | criteria provided, single submitter                  | VCV000568566 | 20               | 63408489       | 568566      | 573602      | rs1203495492 | LOF        | 0.827    | 0.079        | 0.094    |
| KCNQ2 | 605 | T   | I   | NM_172107.4(KCNQ2):c.1814C>T (p.Thr605Ile) | Early infantile epileptic encephalopathy with suppression bursts                                                                           | Uncertain significance(Last reviewed: Oct 27, 2017)                       | criteria provided, single submitter                  | VCV000405209 | 20               | 63408486       | 405209      | 404199      | rs751334184  | LOF        | 0.797    | 0.086        | 0.117    |
| KCNQ2 | 605 | T   | S   | NM_172107.4(KCNQ2):c.1814C>G (p.Thr605Ser) | Early infantile epileptic encephalopathy with suppression bursts not provided                                                              | Conflicting interpretations of pathogenicity(Last reviewed: Sep 19, 2020) | criteria provided, conflicting interpretations       | VCV000205924 | 20               | 63408486       | 205924      | 203715      | rs751334184  | LOF        | 0.798    | 0.094        | 0.109    |
| KCNQ2 | 611 | A   | V   | NM_172107.4(KCNQ2):c.1832C>T (p.Ala611Val) | not provided Early infantile epileptic encephalopathy with suppression bursts                                                              | Benign/Likely benign(Last reviewed: )                                     | criteria provided,                                   | VCV000205847 | 20               | 63408468       | 205847      | 203714      | rs199644682  | LOF        | 0.768    | 0.096        | 0.135    |

| gene  | pos | aa1 | aa2 | Name                                       | Condition(s)                                                                                                                                    | Clinical significance (Last reviewed)                                     | Review status                                        | Accession    | GRCh38Chromosome | GRCh38Location | VariationID | AlleleID(s) | dbSNP ID     | prediction | prob.LOF | prob.Neutral | prob.GOF |
|-------|-----|-----|-----|--------------------------------------------|-------------------------------------------------------------------------------------------------------------------------------------------------|---------------------------------------------------------------------------|------------------------------------------------------|--------------|------------------|----------------|-------------|-------------|--------------|------------|----------|--------------|----------|
|       |     |     |     |                                            |                                                                                                                                                 | Oct 6, 2020)                                                              | multiple submitters, no conflicts                    |              |                  |                |             |             |              |            |          |              |          |
| KCNQ2 | 612 | E   | K   | NM_172107.4(KCNQ2):c.1834G>A (p.Glu612Lys) | Early infantile epileptic encephalopathy with suppression bursts                                                                                | Uncertain significance(Last reviewed: Apr 23, 2018)                       | criteria provided, single submitter                  | VCV000575263 | 20               | 63408466       | 575263      | 573600      | rs1180808546 | LOF        | 0.792    | 0.1          | 0.108    |
| KCNQ2 | 612 | I   | L   | NM_172107.4(KCNQ2):c.1927A>C (p.Ile643Leu) | KCNQ2-Related Disorders Early infantile epileptic encephalopathy with suppression bursts                                                        | Uncertain significance(Last reviewed: Jan 12, 2021)                       | criteria provided, multiple submitters, no conflicts | VCV000639127 | 20               | 63407336       | 639127      | 650444      | rs1021032210 | LOF        | 0.789    | 0.09         | 0.121    |
| KCNQ2 | 622 | R   | W   | NM_172107.4(KCNQ2):c.1864C>T (p.Arg622Trp) | not provided Early infantile epileptic encephalopathy with suppression bursts                                                                   | Conflicting interpretations of pathogenicity(Last reviewed: Aug 27, 2020) | criteria provided, conflicting interpretations       | VCV000420848 | 20               | 63408436       | 420848      | 410816      | rs772405187  | LOF        | 0.864    | 0.054        | 0.082    |
| KCNQ2 | 624 | G   | R   | NM_172107.4(KCNQ2):c.1870G>A (p.Gly624Arg) | Early infantile epileptic encephalopathy with suppression bursts                                                                                | Uncertain significance(Last reviewed: Jun 9, 2018)                        | criteria provided, single submitter                  | VCV000580776 | 20               | 63408430       | 580776      | 571349      | rs771211103  | LOF        | 0.84     | 0.064        | 0.096    |
| KCNQ2 | 624 | G   | R   | NM_172107.4(KCNQ2):c.1870G>A (p.Gly624Arg) | Early infantile epileptic encephalopathy with suppression bursts                                                                                | Uncertain significance(Last reviewed: Jun 9, 2018)                        | criteria provided, single submitter                  | VCV000580776 | 20               | 63408430       | 580776      | 571349      | rs771211103  | LOF        | 0.84     | 0.064        | 0.096    |
| KCNQ2 | 624 | G   | R   | NM_172107.4(KCNQ2):c.1870G>C (p.Gly624Arg) | Early infantile epileptic encephalopathy with suppression bursts                                                                                | Uncertain significance(Last reviewed: Apr 5, 2017)                        | criteria provided, single submitter                  | VCV000405213 | 20               | 63408430       | 405213      | 404203      | rs771211103  | LOF        | 0.84     | 0.064        | 0.096    |
| KCNQ2 | 624 | G   | R   | NM_172107.4(KCNQ2):c.1870G>C (p.Gly624Arg) | Early infantile epileptic encephalopathy with suppression bursts                                                                                | Uncertain significance(Last reviewed: Apr 5, 2017)                        | criteria provided, single submitter                  | VCV000405213 | 20               | 63408430       | 405213      | 404203      | rs771211103  | LOF        | 0.84     | 0.064        | 0.096    |
| KCNQ2 | 625 | E   | K   | NM_172107.4(KCNQ2):c.1966G>A (p.Glu656Lys) | Early infantile epileptic encephalopathy with suppression bursts                                                                                | Uncertain significance(Last reviewed: Jan 21, 2020)                       | criteria provided, single submitter                  | VCV000961623 | 20               | 63407297       | 961623      | 951146      | rs545544936  | LOF        | 0.87     | 0.051        | 0.079    |
| KCNQ2 | 626 | A   | T   | NM_172107.4(KCNQ2):c.1969G>A (p.Ala657Thr) | Early infantile epileptic encephalopathy with suppression bursts                                                                                | Uncertain significance(Last reviewed: Jun 12, 2020)                       | criteria provided, single submitter                  | VCV001026116 | 20               | 63407294       | 1026116     | 1014202     | rs780679486  | LOF        | 0.867    | 0.053        | 0.08     |
| KCNQ2 | 636 | P   | L   | NM_172107.4(KCNQ2):c.1991C>T (p.Pro664Leu) | Early infantile epileptic encephalopathy with suppression bursts                                                                                | Uncertain significance(Last reviewed: Sep 24, 2020)                       | criteria provided, single submitter                  | VCV000936289 | 20               | 63407272       | 936289      | 939022      | rs765493484  | LOF        | 0.885    | 0.038        | 0.077    |
| KCNQ2 | 637 | L   | R   | NM_172107.4(KCNQ2):c.1910T>G (p.Leu637Arg) | Benign familial neonatal seizures 1                                                                                                             | Pathogenic(Last reviewed: Mar 31, 2016)                                   | no assertion criteria provided                       | VCV000021771 | 20               | 63407353       | 21771       | 34623       | rs118192240  | LOF        | 0.88     | 0.042        | 0.078    |
| KCNQ2 | 637 | T   | N   | NM_172107.4(KCNQ2):c.1964C>A (p.Thr655Asn) | not provided                                                                                                                                    | Uncertain significance(Last reviewed: Mar 1, 2018)                        | criteria provided, single submitter                  | VCV000809268 | 20               | 63407299       | 809268      | 798004      | rs1459962137 | LOF        | 0.869    | 0.052        | 0.079    |
| KCNQ2 | 638 | P   | L   | NM_172107.4(KCNQ2):c.1997C>T (p.Pro666Leu) | Early infantile epileptic encephalopathy with suppression bursts Benign familial neonatal seizures 1 Early infantile epileptic encephalopathy 7 | Conflicting interpretations of pathogenicity(Last reviewed: Mar 17, 2020) | criteria provided, conflicting interpretations       | VCV000803618 | 20               | 63407266       | 803618      | 791995      | rs762130930  | LOF        | 0.883    | 0.039        | 0.078    |
| KCNQ2 | 640 | L   | P   | NM_172107.4(KCNQ2):c.1919T>C (p.Leu640Pro) | Early infantile epileptic encephalopathy with suppression bursts                                                                                | Uncertain significance(Last reviewed: Mar 28, 2018)                       | criteria provided, single submitter                  | VCV000581083 | 20               | 63407344       | 581083      | 571347      | rs1568862485 | LOF        | 0.863    | 0.059        | 0.078    |

| gene  | pos | aa1 | aa2 | Name                                       | Condition(s)                                                                                                             | Clinical significance (Last reviewed)                                     | Review status                                        | Accession    | GRCh38Chromosome | GRCh38Location | VariationID | AlleleID(s) | dbSNP ID     | prediction | prob.LOF | prob.Neutral | prob.GOF |
|-------|-----|-----|-----|--------------------------------------------|--------------------------------------------------------------------------------------------------------------------------|---------------------------------------------------------------------------|------------------------------------------------------|--------------|------------------|----------------|-------------|-------------|--------------|------------|----------|--------------|----------|
| KCNQ2 | 646 | Q   | R   | NM_172107.4(KCNQ2):c.1937A>G (p.Gln646Arg) | not provided                                                                                                             | Likely pathogenic(Last reviewed: Aug 8, 2013)                             | criteria provided, single submitter                  | VCV000205925 | 20               | 63407326       | 205925      | 203710      | rs766755499  | LOF        | 0.876    | 0.045        | 0.079    |
| KCNQ2 | 647 | R   | Q   | NM_172107.4(KCNQ2):c.1940G>A (p.Arg647Gln) | Early infantile epileptic encephalopathy with suppression bursts(not provided)                                           | Uncertain significance(Last reviewed: Jun 6, 2020)                        | criteria provided, multiple submitters, no conflicts | VCV000501056 | 20               | 63407323       | 501056      | 492480      | rs765583552  | LOF        | 0.868    | 0.046        | 0.086    |
| KCNQ2 | 647 | R   | W   | NM_172107.4(KCNQ2):c.1939C>T (p.Arg647Trp) | Early infantile epileptic encephalopathy with suppression bursts                                                         | Uncertain significance(Last reviewed: Apr 10, 2018)                       | criteria provided, single submitter                  | VCV000579920 | 20               | 63407324       | 579920      | 573598      | rs773450069  | LOF        | 0.858    | 0.05         | 0.092    |
| KCNQ2 | 650 | D   | N   | NM_172107.4(KCNQ2):c.2041G>A (p.Asp681Asn) | not provided                                                                                                             | Uncertain significance(Last reviewed: Dec 31, 2018)                       | criteria provided, single submitter                  | VCV000804958 | 20               | 63407222       | 804958      | 793849      | rs1380546879 | LOF        | 0.833    | 0.076        | 0.091    |
| KCNQ2 | 652 | P   | L   | NM_172107.4(KCNQ2):c.1955C>T (p.Pro652Leu) | Early infantile epileptic encephalopathy with suppression bursts Early infantile epileptic encephalopathy 7 not provided | Conflicting interpretations of pathogenicity(Last reviewed: May 14, 2021) | criteria provided, conflicting interpretations       | VCV000205951 | 20               | 63407308       | 205951      | 203708      | rs770730662  | LOF        | 0.822    | 0.071        | 0.107    |
| KCNQ2 | 652 | P   | R   | NM_172107.4(KCNQ2):c.1955C>G (p.Pro652Arg) | Early infantile epileptic encephalopathy with suppression bursts(not provided)                                           | Uncertain significance(Last reviewed: Sep 19, 2018)                       | criteria provided, multiple submitters, no conflicts | VCV000430045 | 20               | 63407308       | 430045      | 422336      | rs770730662  | LOF        | 0.813    | 0.079        | 0.107    |
| KCNQ2 | 662 | S   | R   | NM_172107.4(KCNQ2):c.2079C>G (p.Ser693Arg) | Early infantile epileptic encephalopathy with suppression bursts(not provided)                                           | Uncertain significance(Last reviewed: Jul 10, 2020)                       | criteria provided, multiple submitters, no conflicts | VCV001007306 | 20               | 63407184       | 1007306     | 999078      | rs2079971597 | LOF        | 0.788    | 0.103        | 0.11     |
| KCNQ2 | 667 | A   | V   | NM_172107.4(KCNQ2):c.2000C>T (p.Ala667Val) | Early infantile epileptic encephalopathy with suppression bursts(not specified)                                          | Uncertain significance(Last reviewed: Feb 18, 2020)                       | criteria provided, multiple submitters, no conflicts | VCV000373184 | 20               | 63407263       | 373184      | 360475      | rs563291132  | LOF        | 0.805    | 0.083        | 0.112    |
| KCNQ2 | 668 | K   | E   | NM_172107.4(KCNQ2):c.2095A>G (p.Lys699Glu) | Early infantile epileptic encephalopathy with suppression bursts                                                         | Uncertain significance(Last reviewed: May 6, 2020)                        | criteria provided, single submitter                  | VCV001051022 | 20               | 63407168       | 1051022     | 1051777     | NA           | LOF        | 0.826    | 0.082        | 0.092    |
| KCNQ2 | 669 | P   | L   | NM_172107.4(KCNQ2):c.2006C>T (p.Pro669Leu) | Early infantile epileptic encephalopathy with suppression bursts                                                         | Uncertain significance(Last reviewed: Mar 6, 2020)                        | criteria provided, single submitter                  | VCV000651375 | 20               | 63407257       | 651375      | 650447      | rs774306858  | LOF        | 0.784    | 0.106        | 0.11     |
| KCNQ2 | 670 | F   | L   | NM_172107.4(KCNQ2):c.2103C>G (p.Phe701Leu) | Early infantile epileptic encephalopathy with suppression bursts                                                         | Uncertain significance(Last reviewed: Jun 23, 2020)                       | criteria provided, single submitter                  | VCV001052247 | 20               | 63407160       | 1052247     | 1051776     | NA           | LOF        | 0.797    | 0.095        | 0.108    |
| KCNQ2 | 673 | P   | S   | NM_172107.4(KCNQ2):c.2110C>T (p.Pro704Ser) | not provided                                                                                                             | Uncertain significance(Last reviewed: Dec 31, 2019)                       | criteria provided, single submitter                  | VCV001311778 | 20               | 63407153       | 1311778     | 1299835     | NA           | LOF        | 0.779    | 0.112        | 0.109    |
| KCNQ2 | 674 | S   | L   | NM_172107.4(KCNQ2):c.2105C>T (p.Ser702Leu) | Early infantile epileptic encephalopathy with suppression bursts                                                         | Uncertain significance(Last reviewed: Oct 4, 2018)                        | criteria provided, single submitter                  | VCV000658483 | 20               | 63407158       | 658483      | 650450      | rs1555850884 | LOF        | 0.784    | 0.099        | 0.117    |
| KCNQ2 | 675 | D   | E   | NM_172107.4(KCNQ2):c.2025C>G (p.Asp675Glu) | Early infantile epileptic encephalopathy with suppression bursts(not provided)                                           | Uncertain significance(Last reviewed: Aug 1, 2020)                        | criteria provided, multiple submitters, no conflicts | VCV000530521 | 20               | 63407238       | 530521      | 533682      | rs553337046  | LOF        | 0.787    | 0.11         | 0.103    |

| gene  | pos | aa1 | aa2 | Name                                       | Condition(s)                                                                            | Clinical significance (Last reviewed)                                     | Review status                                        | Accession    | GRCh38Chromosome | GRCh38Location | VariationID | AlleleID(s) | dbSNP ID     | prediction | prob.LOF | prob.Neutral | prob.GOF |
|-------|-----|-----|-----|--------------------------------------------|-----------------------------------------------------------------------------------------|---------------------------------------------------------------------------|------------------------------------------------------|--------------|------------------|----------------|-------------|-------------|--------------|------------|----------|--------------|----------|
| KCNQ2 | 677 | P   | H   | NM_172107.4(KCNQ2):c.2123C>A (p.Pro708His) | Early infantile epileptic encephalopathy with suppression bursts                        | Uncertain significance(Last reviewed: Dec 4, 2019)                        | criteria provided, single submitter                  | VCV000848817 | 20               | 63407140       | 848817      | 848518      | rs1360560623 | LOF        | 0.792    | 0.105        | 0.103    |
| KCNQ2 | 677 | R   | P   | NM_172107.4(KCNQ2):c.2030G>C (p.Arg677Pro) | Early infantile epileptic encephalopathy 7  Benign familial neonatal seizures 1         | Uncertain significance(Last reviewed: May 22, 2018)                       | criteria provided, single submitter                  | VCV000626125 | 20               | 63407233       | 626125      | 614476      | rs1326189284 | LOF        | 0.823    | 0.088        | 0.089    |
| KCNQ2 | 677 | R   | W   | NM_172107.4(KCNQ2):c.2029C>T (p.Arg677Trp) | Early infantile epileptic encephalopathy with suppression bursts                        | Uncertain significance(Last reviewed: Apr 3, 2018)                        | criteria provided, single submitter                  | VCV000582756 | 20               | 63407234       | 582756      | 575131      | rs371851085  | LOF        | 0.819    | 0.086        | 0.095    |
| KCNQ2 | 679 | A   | V   | NM_172107.4(KCNQ2):c.2120C>T (p.Ala707Val) | Early infantile epileptic encephalopathy with suppression bursts                        | Uncertain significance(Last reviewed: Aug 20, 2020)                       | criteria provided, single submitter                  | VCV001039210 | 20               | 63407143       | 1039210     | 1034791     | rs753033741  | LOF        | 0.765    | 0.093        | 0.141    |
| KCNQ2 | 681 | P   | L   | NM_172107.4(KCNQ2):c.2126C>T (p.Pro709Leu) | Early infantile epileptic encephalopathy with suppression bursts                        | Uncertain significance(Last reviewed: Dec 27, 2019)                       | criteria provided, single submitter                  | VCV000858105 | 20               | 63407137       | 858105      | 848517      | rs2079968880 | LOF        | 0.773    | 0.105        | 0.122    |
| KCNQ2 | 684 | G   | S   | NM_172107.4(KCNQ2):c.2050G>A (p.Gly684Ser) | not provided                                                                            | Uncertain significance(Last reviewed: Nov 26, 2013)                       | criteria provided, single submitter                  | VCV000205928 | 20               | 63407213       | 205928      | 203706      | rs577281854  | LOF        | 0.776    | 0.108        | 0.115    |
| KCNQ2 | 686 | I   | V   | NM_172107.4(KCNQ2):c.2056A>G (p.Ile686Val) | Early infantile epileptic encephalopathy with suppression bursts                        | Uncertain significance(Last reviewed: Aug 25, 2020)                       | criteria provided, single submitter                  | VCV001041204 | 20               | 63407207       | 1041204     | 1034792     | rs558926802  | LOF        | 0.799    | 0.073        | 0.128    |
| KCNQ2 | 689 | I   | L   | NM_172107.4(KCNQ2):c.2065A>C (p.Ile689Leu) | Seizures Early infantile epileptic encephalopathy with suppression bursts not specified | Benign(Last reviewed: Nov 13, 2020)                                       | criteria provided, multiple submitters, no conflicts | VCV000205848 | 20               | 63407198       | 205848      | 203705      | rs201701585  | LOF        | 0.779    | 0.08         | 0.141    |
| KCNQ2 | 690 | V   | M   | NM_172107.4(KCNQ2):c.2068G>A (p.Val690Met) | not provided                                                                            | Uncertain significance(Last reviewed: Nov 1, 2017)                        | criteria provided, single submitter                  | VCV000546903 | 20               | 63407195       | 546903      | 537392      | rs373902907  | LOF        | 0.787    | 0.08         | 0.133    |
| KCNQ2 | 691 | R   | H   | NM_172107.4(KCNQ2):c.2072G>A (p.Arg691His) | not specified Early infantile epileptic encephalopathy with suppression bursts          | Conflicting interpretations of pathogenicity(Last reviewed: Aug 23, 2018) | criteria provided, conflicting interpretations       | VCV000205930 | 20               | 63407191       | 205930      | 203704      | rs773194884  | LOF        | 0.817    | 0.084        | 0.099    |
| KCNQ2 | 694 | R   | H   | NM_172107.4(KCNQ2):c.2174G>A (p.Arg725His) | Early infantile epileptic encephalopathy with suppression bursts                        | Uncertain significance(Last reviewed: Mar 10, 2020)                       | criteria provided, single submitter                  | VCV001022214 | 20               | 63407089       | 1022214     | 1014201     | rs775271635  | LOF        | 0.818    | 0.084        | 0.098    |
| KCNQ2 | 694 | S   | T   | NM_172107.4(KCNQ2):c.2081G>C (p.Ser694Thr) | Early infantile epileptic encephalopathy with suppression bursts                        | Uncertain significance(Last reviewed: Oct 21, 2020)                       | criteria provided, single submitter                  | VCV000405206 | 20               | 63407182       | 405206      | 404190      | rs769558746  | LOF        | 0.796    | 0.091        | 0.113    |
| KCNQ2 | 696 | E   | K   | NM_172107.4(KCNQ2):c.2032G>A (p.Glu678Lys) | Early infantile epileptic encephalopathy with suppression bursts                        | Uncertain significance(Last reviewed: Feb 17, 2020)                       | criteria provided, single submitter                  | VCV000964951 | 20               | 63407231       | 964951      | 958866      | rs2079974270 | LOF        | 0.762    | 0.125        | 0.113    |
| KCNQ2 | 696 | G   | S   | NM_172107.4(KCNQ2):c.2179G>A (p.Gly727Ser) | Early infantile epileptic encephalopathy with suppression bursts                        | Uncertain significance(Last reviewed: Apr 19, 2019)                       | criteria provided, single submitter                  | VCV000840292 | 20               | 63407084       | 840292      | 848516      | rs368549458  | LOF        | 0.742    | 0.137        | 0.121    |
| KCNQ2 | 696 | P   | L   | NM_172107.4(KCNQ2):c.2171C>T (p.Pro724Leu) | Early infantile epileptic encephalopathy with suppression bursts                        | Uncertain significance(Last reviewed: Nov 9, 2018)                        | criteria provided, single submitter                  | VCV000642202 | 20               | 63407092       | 642202      | 650452      | rs761544880  | LOF        | 0.757    | 0.124        | 0.119    |



| gene  | pos | aa1 | aa2 | Name                                       | Condition(s)                                                                  | Clinical significance (Last reviewed)                                     | Review status                                  | Accession    | GRCh38Chromosome | GRCh38Location | VariationID | AlleleID(s) | dbSNP ID     | prediction | prob.LOF | prob.Neutral | prob.GOF |
|-------|-----|-----|-----|--------------------------------------------|-------------------------------------------------------------------------------|---------------------------------------------------------------------------|------------------------------------------------|--------------|------------------|----------------|-------------|-------------|--------------|------------|----------|--------------|----------|
| KCNQ2 | 696 | T   | M   | NM_172107.4(KCNQ2):c.2087C>T (p.Thr696Met) | Early infantile epileptic encephalopathy with suppression bursts not provided | Conflicting interpretations of pathogenicity(Last reviewed: Jun 4, 2021)  | criteria provided, conflicting interpretations | VCV000461412 | 20               | 63407176       | 461412      | 471465      | rs570139975  | LOF        | 0.764    | 0.114        | 0.123    |
| KCNQ2 | 699 | T   | A   | NM_172107.4(KCNQ2):c.2188A>G (p.Thr730Ala) | Early infantile epileptic encephalopathy with suppression bursts              | Uncertain significance(Last reviewed: Apr 5, 2020)                        | criteria provided, single submitter            | VCV001010969 | 20               | 63407075       | 1010969     | 999077      | rs1441250745 | LOF        | 0.772    | 0.113        | 0.116    |
| KCNQ2 | 705 | V   | M   | NM_172107.4(KCNQ2):c.2197G>A (p.Val733Met) | Early infantile epileptic encephalopathy with suppression bursts              | Uncertain significance(Last reviewed: Aug 2, 2020)                        | criteria provided, single submitter            | VCV000850259 | 20               | 63407066       | 850259      | 848515      | rs756563523  | LOF        | 0.782    | 0.099        | 0.119    |
| KCNQ2 | 706 | G   | D   | NM_172107.4(KCNQ2):c.2210G>A (p.Gly737Asp) | Early infantile epileptic encephalopathy with suppression bursts              | Uncertain significance(Last reviewed: Nov 7, 2018)                        | criteria provided, single submitter            | VCV000657511 | 20               | 63407053       | 657511      | 650453      | rs751657917  | LOF        | 0.736    | 0.146        | 0.118    |
| KCNQ2 | 707 | A   | T   | NM_172107.4(KCNQ2):c.2119G>A (p.Ala707Thr) | Early infantile epileptic encephalopathy with suppression bursts Seizures     | Conflicting interpretations of pathogenicity(Last reviewed: Aug 17, 2020) | criteria provided, conflicting interpretations | VCV000577370 | 20               | 63407144       | 577370      | 571344      | rs543477138  | LOF        | 0.756    | 0.119        | 0.125    |
| KCNQ2 | 707 | D   | N   | NM_172107.4(KCNQ2):c.2203G>A (p.Asp735Asn) | Early infantile epileptic encephalopathy with suppression bursts              | Uncertain significance(Last reviewed: Sep 10, 2019)                       | criteria provided, single submitter            | VCV000937305 | 20               | 63407060       | 937305      | 939021      | rs1333247951 | LOF        | 0.752    | 0.135        | 0.113    |
| KCNQ2 | 708 | L   | Q   | NM_172107.4(KCNQ2):c.2216T>A (p.Leu739Gln) | Early infantile epileptic encephalopathy with suppression bursts              | Uncertain significance(Last reviewed: Mar 6, 2020)                        | criteria provided, single submitter            | VCV001006011 | 20               | 63407047       | 1006011     | 999076      | rs2079965385 | LOF        | 0.778    | 0.107        | 0.114    |
| KCNQ2 | 713 | R   | C   | NM_172107.4(KCNQ2):c.2221C>T (p.Arg741Cys) | Early infantile epileptic encephalopathy with suppression bursts              | Uncertain significance(Last reviewed: Feb 22, 2019)                       | criteria provided, single submitter            | VCV000846206 | 20               | 63407042       | 846206      | 848514      | rs2079965070 | LOF        | 0.79     | 0.094        | 0.116    |
| KCNQ2 | 716 | A   | V   | NM_172107.4(KCNQ2):c.2240C>T (p.Ala747Val) | Early infantile epileptic encephalopathy with suppression bursts              | Uncertain significance(Last reviewed: Sep 24, 2019)                       | criteria provided, single submitter            | VCV000937276 | 20               | 63407023       | 937276      | 939020      | rs1244838198 | LOF        | 0.792    | 0.088        | 0.12     |
| KCNQ2 | 716 | T   | I   | NM_172107.4(KCNQ2):c.2147C>T (p.Thr716Ile) | Early infantile epileptic encephalopathy 7                                    | Pathogenic                                                                | no assertion criteria provided                 | VCV000219239 | 20               | 63407116       | 219239      | 217256      | rs864321711  | LOF        | 0.798    | 0.084        | 0.118    |
| KCNQ2 | 719 | R   | W   | NM_172107.4(KCNQ2):c.2248C>T (p.Arg750Trp) | Early infantile epileptic encephalopathy with suppression bursts              | Uncertain significance(Last reviewed: Jun 6, 2020)                        | criteria provided, single submitter            | VCV001040518 | 20               | 63407015       | 1040518     | 1034790     | rs759060719  | LOF        | 0.799    | 0.097        | 0.104    |
| KCNQ2 | 722 | S   | N   | NM_172107.4(KCNQ2):c.2165G>A (p.Ser722Asn) | Early infantile epileptic encephalopathy with suppression bursts              | Uncertain significance(Last reviewed: May 18, 2017)                       | criteria provided, single submitter            | VCV000461413 | 20               | 63407098       | 461413      | 470984      | rs980574000  | LOF        | 0.752    | 0.135        | 0.114    |
| KCNQ2 | 725 | P   | L   | NM_172107.4(KCNQ2):c.2228C>T (p.Pro743Leu) | Early infantile epileptic encephalopathy with suppression bursts              | Uncertain significance(Last reviewed: Aug 21, 2020)                       | criteria provided, single submitter            | VCV000971350 | 20               | 63407035       | 971350      | 958865      | rs757187432  | LOF        | 0.762    | 0.126        | 0.113    |
| KCNQ2 | 725 | R   | C   | NM_172107.4(KCNQ2):c.2173C>T (p.Arg725Cys) | Early infantile epileptic encephalopathy with suppression bursts not provided | Conflicting interpretations of pathogenicity(Last reviewed: Mar 31, 2021) | criteria provided, conflicting interpretations | VCV000461414 | 20               | 63407090       | 461414      | 469438      | rs768284828  | LOF        | 0.779    | 0.115        | 0.106    |
| KCNQ2 | 726 | A   | T   | NM_172107.4(KCNQ2):c.2260G>A (p.Ala754Thr) | Early infantile epileptic encephalopathy with suppression bursts              | Uncertain significance(Last reviewed: Sep 15, 2020)                       | criteria provided, single submitter            | VCV001040253 | 20               | 63407003       | 1040253     | 1034789     | rs773822234  | LOF        | 0.749    | 0.128        | 0.123    |

| gene  | pos | aa1 | aa2 | Name                                                 | Condition(s)                                                                                                                                    | Clinical significance (Last reviewed)                                     | Review status                                        | Accession    | GRCh38Chromosome | GRCh38Location      | VariationID | AlleleID(s) | dbSNP ID     | prediction | prob.LOF | prob.Neutral | prob.GOF |
|-------|-----|-----|-----|------------------------------------------------------|-------------------------------------------------------------------------------------------------------------------------------------------------|---------------------------------------------------------------------------|------------------------------------------------------|--------------|------------------|---------------------|-------------|-------------|--------------|------------|----------|--------------|----------|
| KCNQ2 | 726 | P   | A   | NM_172107.4(KCNQ2):c.2122C>G (p.Pro708Ala)           | Early infantile epileptic encephalopathy with suppression bursts                                                                                | Uncertain significance(Last reviewed: Nov 10, 2019)                       | criteria provided, single submitter                  | VCV000958346 | 20               | 63407141            | 958346      | 951144      | rs767485841  | LOF        | 0.746    | 0.138        | 0.115    |
| KCNQ2 | 730 | A   | S   | NM_172107.4(KCNQ2):c.2281G>T (p.Ala761Ser)           | not provided Early infantile epileptic encephalopathy with suppression bursts                                                                   | Conflicting interpretations of pathogenicity(Last reviewed: Mar 12, 2021) | criteria provided, conflicting interpretations       | VCV001041104 | 20               | 63406982            | 1041104     | 1034788     | rs587780366  | LOF        | 0.774    | 0.113        | 0.113    |
| KCNQ2 | 731 | E   | K   | NM_172107.4(KCNQ2):c.2245G>A (p.Glu749Lys)           | Early infantile epileptic encephalopathy 7 not provided                                                                                         | Uncertain significance(Last reviewed: May 1, 2016)                        | criteria provided, multiple submitters, no conflicts | VCV000809267 | 20               | 63407018            | 809267      | 798003      | rs796052658  | LOF        | 0.793    | 0.104        | 0.103    |
| KCNQ2 | 736 | R   | Q   | NM_172107.4(KCNQ2):c.2300G>A (p.Arg767Gln)           | Early infantile epileptic encephalopathy with suppression bursts                                                                                | Uncertain significance(Last reviewed: Feb 17, 2020)                       | criteria provided, single submitter                  | VCV000842415 | 20               | 63406963            | 842415      | 848512      | rs752551225  | LOF        | 0.784    | 0.111        | 0.105    |
| KCNQ2 | 737 | G   | S   | NM_172107.4(KCNQ2):c.2209G>A (p.Gly737Ser)           | not provided                                                                                                                                    | Likely benign(Last reviewed: Sep 3, 2020)                                 | criteria provided, single submitter                  | VCV000339330 | 20               | 63407054            | 339330      | 346010      | rs755013341  | LOF        | 0.749    | 0.13         | 0.121    |
| KCNQ2 | 740 | V   | A   | NM_172107.4(KCNQ2):c.2219T>C (p.Val740Ala)           | not provided                                                                                                                                    | Uncertain significance(Last reviewed: Mar 30, 2017)                       | criteria provided, single submitter                  | VCV000424526 | 20               | 63407044            | 424526      | 410814      | rs1064797020 | LOF        | 0.791    | 0.094        | 0.115    |
| KCNQ2 | 743 | C   | Y   | NM_172107.4(KCNQ2):c.2321_2322delinsAT (p.Cys774Tyr) | Early infantile epileptic encephalopathy with suppression bursts                                                                                | Uncertain significance(Last reviewed: Jun 14, 2019)                       | criteria provided, single submitter                  | VCV000855374 | 20               | 63406941 - 63406942 | 855374      | 848511      | rs2079958591 | LOF        | 0.789    | 0.104        | 0.107    |
| KCNQ2 | 745 | P   | L   | NM_172107.4(KCNQ2):c.2234C>T (p.Pro745Leu)           | Intellectual disability not specified                                                                                                           | Uncertain significance(Last reviewed: Nov 29, 2016)                       | criteria provided, single submitter                  | VCV000373718 | 20               | 63407029            | 373718      | 360471      | rs1057518569 | LOF        | 0.786    | 0.104        | 0.11     |
| KCNQ2 | 751 | R   | W   | NM_172107.4(KCNQ2):c.2344C>T (p.Arg782Trp)           | not provided                                                                                                                                    | Uncertain significance(Last reviewed: Jun 14, 2019)                       | criteria provided, single submitter                  | VCV001302247 | 20               | 63406919            | 1302247     | 1292529     | NA           | LOF        | 0.792    | 0.103        | 0.105    |
| KCNQ2 | 751 | S   | L   | NM_172107.4(KCNQ2):c.2252C>T (p.Ser751Leu)           | Early infantile epileptic encephalopathy with suppression bursts Early infantile epileptic encephalopathy 7                                     | Uncertain significance(Last reviewed: Aug 20, 2020)                       | criteria provided, multiple submitters, no conflicts | VCV000339329 | 20               | 63407011            | 339329      | 346004      | rs774002673  | LOF        | 0.781    | 0.101        | 0.117    |
| KCNQ2 | 755 | Y   | C   | NM_172107.4(KCNQ2):c.2264A>G (p.Tyr755Cys)           | Early infantile epileptic encephalopathy with suppression bursts not specified not provided Seizures                                            | Benign/Likely benign(Last reviewed: Dec 2, 2020)                          | criteria provided, multiple submitters, no conflicts | VCV000129333 | 20               | 63406999            | 129333      | 134779      | rs3746366    | LOF        | 0.76     | 0.119        | 0.121    |
| KCNQ2 | 756 | G   | S   | NM_172107.4(KCNQ2):c.2266G>A (p.Gly756Ser)           | Early infantile epileptic encephalopathy with suppression bursts Seizures not provided                                                          | Benign/Likely benign(Last reviewed: Nov 24, 2020)                         | criteria provided, multiple submitters, no conflicts | VCV000205849 | 20               | 63406997            | 205849      | 203700      | rs200909197  | LOF        | 0.738    | 0.14         | 0.122    |
| KCNQ2 | 759 | I   | T   | NM_172107.4(KCNQ2):c.2369T>C (p.Ile790Thr)           | not provided                                                                                                                                    | Uncertain significance(Last reviewed: Apr 8, 2019)                        | criteria provided, single submitter                  | VCV001304987 | 20               | 63406894            | 1304987     | 1295262     | NA           | LOF        | 0.758    | 0.122        | 0.12     |
| KCNQ2 | 760 | R   | C   | NM_172107.4(KCNQ2):c.2278C>T (p.Arg760Cys)           | Early infantile epileptic encephalopathy with suppression bursts Benign familial neonatal seizures 1 Early infantile epileptic encephalopathy 7 | Uncertain significance(Last reviewed: Oct 31, 2018)                       | criteria provided, multiple submitters, no conflicts | VCV000530437 | 20               | 63406985            | 530437      | 533610      | rs1449467609 | LOF        | 0.778    | 0.111        | 0.111    |
| KCNQ2 | 760 | R   | H   | NM_172107.4(KCNQ2):c.2279G>A                         | Early infantile epileptic encephalopathy with                                                                                                   | Uncertain                                                                 | criteria                                             | VCV000216827 | 20               | 63406984            | 216827      | 213472      | rs758530960  | LOF        | 0.788    | 0.109        | 0.103    |

| gene  | pos | aa1 | aa2 | Name                                       | Condition(s)                                                                                                                                                                        | Clinical significance (Last reviewed)                                     | Review status                                        | Accession    | GRCh38Chromosome | GRCh38Location | VariationID | AlleleID(s) | dbSNP ID    | prediction | prob.LOF | prob.Neutral | prob.GOF |
|-------|-----|-----|-----|--------------------------------------------|-------------------------------------------------------------------------------------------------------------------------------------------------------------------------------------|---------------------------------------------------------------------------|------------------------------------------------------|--------------|------------------|----------------|-------------|-------------|-------------|------------|----------|--------------|----------|
|       |     |     |     | (p.Arg760His)                              | suppression bursts                                                                                                                                                                  | significance(Last reviewed: Apr 17, 2020)                                 | provided, single submitter                           |              |                  |                |             |             |             |            |          |              |          |
| KCNQ2 | 761 | A   | T   | NM_172107.4(KCNQ2):c.2281G>A (p.Ala761Thr) | not provided                                                                                                                                                                        | Uncertain significance(Last reviewed: Aug 8, 2013)                        | criteria provided, single submitter                  | VCV000129334 | 20               | 63406982       | 129334      | 134780      | rs587780366 | LOF        | 0.771    | 0.104        | 0.125    |
| KCNQ2 | 762 | V   | M   | NM_172107.4(KCNQ2):c.2377G>A (p.Val793Met) | Early infantile epileptic encephalopathy with suppression bursts                                                                                                                    | Uncertain significance(Last reviewed: Oct 9, 2020)                        | criteria provided, single submitter                  | VCV001025174 | 20               | 63406886       | 1025174     | 1014200     | rs377227909 | LOF        | 0.769    | 0.113        | 0.118    |
| KCNQ2 | 767 | R   | W   | NM_172107.4(KCNQ2):c.2299C>T (p.Arg767Trp) | Early infantile epileptic encephalopathy with suppression bursts not provided                                                                                                       | Uncertain significance(Last reviewed: Dec 26, 2018)                       | criteria provided, multiple submitters, no conflicts | VCV000432454 | 20               | 63406964       | 432454      | 426350      | rs755823361 | LOF        | 0.781    | 0.115        | 0.104    |
| KCNQ2 | 768 | T   | M   | NM_172107.4(KCNQ2):c.2357C>T (p.Thr786Met) | Early infantile epileptic encephalopathy with suppression bursts                                                                                                                    | Uncertain significance(Last reviewed: Jan 23, 2019)                       | criteria provided, single submitter                  | VCV000852085 | 20               | 63406906       | 852085      | 848510      | rs754872408 | LOF        | 0.757    | 0.123        | 0.12     |
| KCNQ2 | 771 | T   | I   | NM_172107.4(KCNQ2):c.2312C>T (p.Thr771Ile) | Early infantile epileptic encephalopathy with suppression bursts not provided                                                                                                       | Conflicting interpretations of pathogenicity(Last reviewed: Sep 14, 2020) | criteria provided, conflicting interpretations       | VCV000461417 | 20               | 63406951       | 461417      | 471463      | rs759258191 | LOF        | 0.764    | 0.114        | 0.121    |
| KCNQ2 | 772 | P   | L   | NM_172107.4(KCNQ2):c.2315C>T (p.Pro772Leu) | Early infantile epileptic encephalopathy with suppression bursts                                                                                                                    | Uncertain significance(Last reviewed: Mar 7, 2019)                        | criteria provided, single submitter                  | VCV000530457 | 20               | 63406948       | 530457      | 533670      | rs774206764 | LOF        | 0.753    | 0.129        | 0.117    |
| KCNQ2 | 774 | C   | F   | NM_172107.4(KCNQ2):c.2321G>T (p.Cys774Phe) | not provided                                                                                                                                                                        | Uncertain significance(Last reviewed: Apr 19, 2017)                       | criteria provided, single submitter                  | VCV000426357 | 20               | 63406942       | 426357      | 415695      | rs762596565 | LOF        | 0.766    | 0.114        | 0.12     |
| KCNQ2 | 777 | P   | R   | NM_172107.4(KCNQ2):c.2330C>G (p.Pro777Arg) | Early infantile epileptic encephalopathy with suppression bursts not provided                                                                                                       | Conflicting interpretations of pathogenicity(Last reviewed: Oct 11, 2020) | criteria provided, conflicting interpretations       | VCV000205851 | 20               | 63406933       | 205851      | 203698      | rs142729516 | LOF        | 0.753    | 0.132        | 0.114    |
| KCNQ2 | 777 | P   | S   | NM_172107.4(KCNQ2):c.2329C>T (p.Pro777Ser) | Early infantile epileptic encephalopathy with suppression bursts not provided Continuous spike and waves during slow-wave sleep syndrome                                            | Conflicting interpretations of pathogenicity(Last reviewed: Aug 1, 2021)  | criteria provided, conflicting interpretations       | VCV000205850 | 20               | 63406934       | 205850      | 203699      | rs748400155 | LOF        | 0.753    | 0.133        | 0.114    |
| KCNQ2 | 780 | N   | T   | NM_172107.4(KCNQ2):c.2339A>C (p.Asn780Thr) | not provided Benign familial neonatal seizures 1 Early infantile epileptic encephalopathy with suppression bursts Seizures Early infantile epileptic encephalopathy 7 not specified | Benign(Last reviewed: Aug 19, 2021)                                       | criteria provided, multiple submitters, no conflicts | VCV000021779 | 20               | 63406924       | 21779       | 34631       | rs1801475   | LOF        | 0.773    | 0.11         | 0.116    |
| KCNQ2 | 785 | A   | S   | NM_172107.4(KCNQ2):c.2446G>T (p.Ala816Ser) | Early infantile epileptic encephalopathy with suppression bursts                                                                                                                    | Uncertain significance(Last reviewed: Mar 10, 2020)                       | criteria provided, single submitter                  | VCV001023639 | 20               | 63406817       | 1023639     | 1014199     | rs796052660 | LOF        | 0.799    | 0.101        | 0.1      |
| KCNQ2 | 785 | D   | E   | NM_172107.4(KCNQ2):c.2355C>A (p.Asp785Glu) | not provided                                                                                                                                                                        | Uncertain significance(Last reviewed: Jun 1, 2017)                        | criteria provided, single submitter                  | VCV000444569 | 20               | 63406908       | 444569      | 438209      | rs781121496 | LOF        | 0.796    | 0.107        | 0.097    |
| KCNQ2 | 793 | V   | L   | NM_172107.4(KCNQ2):c.2377G>T (p.Val793Leu) | Early infantile epileptic encephalopathy with suppression bursts not provided                                                                                                       | Conflicting interpretations of pathogenicity(Last reviewed: Aug 28, 2020) | criteria provided, conflicting interpretations       | VCV000279817 | 20               | 63406886       | 279817      | 264882      | rs377227909 | LOF        | 0.811    | 0.073        | 0.116    |
| KCNQ2 | 795 | P   | R   | NM_172107.4(KCNQ2):c.2477C>G               | not provided                                                                                                                                                                        | Uncertain                                                                 | criteria                                             | VCV001314255 | 20               | 63406786       | 1314255     | 1304516     | NA          | LOF        | 0.795    | 0.1          | 0.106    |

| gene  | pos | aa1 | aa2 | Name                                       | Condition(s)                                                                                                | Clinical significance (Last reviewed)               | Review status                                        | Accession    | GRCh38Chromosome | GRCh38Location | VariationID | AlleleID(s) | dbSNP ID     | prediction | prob.LOF | prob.Neutral | prob.GOF |
|-------|-----|-----|-----|--------------------------------------------|-------------------------------------------------------------------------------------------------------------|-----------------------------------------------------|------------------------------------------------------|--------------|------------------|----------------|-------------|-------------|--------------|------------|----------|--------------|----------|
|       |     |     |     | (p.Pro826Arg)                              |                                                                                                             | significance(Last reviewed: Apr 6, 2021)            | provided, single submitter                           |              |                  |                |             |             |              |            |          |              |          |
| KCNQ2 | 802 | F   | L   | NM_172107.4(KCNQ2):c.2404T>C (p.Phe802Leu) | Early infantile epileptic encephalopathy with suppression bursts(not provided)                              | Uncertain significance(Last reviewed: Oct 8, 2020)  | criteria provided, multiple submitters, no conflicts | VCV000205932 | 20               | 63406859       | 205932      | 203697      | rs796052659  | LOF        | 0.805    | 0.07         | 0.125    |
| KCNQ2 | 816 | A   | T   | NM_172107.4(KCNQ2):c.2446G>A (p.Ala816Thr) | not provided                                                                                                | Uncertain significance(Last reviewed: Jul 23, 2018) | criteria provided, single submitter                  | VCV000205933 | 20               | 63406817       | 205933      | 203696      | rs796052660  | LOF        | 0.773    | 0.103        | 0.124    |
| KCNQ2 | 822 | A   | T   | NM_172107.4(KCNQ2):c.2464G>A (p.Ala822Thr) | Early infantile epileptic encephalopathy with suppression bursts                                            | Uncertain significance(Last reviewed: Oct 27, 2020) | criteria provided, single submitter                  | VCV000461419 | 20               | 63406799       | 461419      | 470980      | rs751425807  | LOF        | 0.794    | 0.089        | 0.118    |
| KCNQ2 | 822 | A   | V   | NM_172107.4(KCNQ2):c.2465C>T (p.Ala822Val) | Early infantile epileptic encephalopathy with suppression bursts(not provided)                              | Uncertain significance(Last reviewed: Jul 18, 2018) | criteria provided, multiple submitters, no conflicts | VCV000205934 | 20               | 63406798       | 205934      | 203695      | rs796052661  | LOF        | 0.789    | 0.084        | 0.126    |
| KCNQ2 | 822 | G   | R   | NM_172107.4(KCNQ2):c.2548G>A (p.Gly850Arg) | Early infantile epileptic encephalopathy with suppression bursts                                            | Uncertain significance(Last reviewed: Apr 9, 2020)  | criteria provided, single submitter                  | VCV000855255 | 20               | 63406715       | 855255      | 848508      | rs779986547  | LOF        | 0.787    | 0.101        | 0.112    |
| KCNQ2 | 825 | A   | G   | NM_172107.4(KCNQ2):c.2474C>G (p.Ala825Gly) | Early infantile epileptic encephalopathy 7 Early infantile epileptic encephalopathy with suppression bursts | Uncertain significance(Last reviewed: May 9, 2019)  | criteria provided, multiple submitters, no conflicts | VCV000582445 | 20               | 63406789       | 582445      | 571338      | rs1568858969 | LOF        | 0.83     | 0.083        | 0.087    |
| KCNQ2 | 828 | C   | G   | NM_172107.4(KCNQ2):c.2536T>G (p.Cys846Gly) | Early infantile epileptic encephalopathy with suppression bursts                                            | Uncertain significance(Last reviewed: May 21, 2020) | criteria provided, single submitter                  | VCV001046700 | 20               | 63406727       | 1046700     | 1034784     | rs2079947062 | LOF        | 0.831    | 0.081        | 0.087    |
| KCNQ2 | 834 | I   | V   | NM_172107.4(KCNQ2):c.2500A>G (p.Ile834Val) | Early infantile epileptic encephalopathy with suppression bursts(not provided)                              | Uncertain significance(Last reviewed: Feb 4, 2019)  | criteria provided, multiple submitters, no conflicts | VCV000502110 | 20               | 63406763       | 502110      | 493534      | rs1555850289 | LOF        | 0.827    | 0.061        | 0.111    |
| KCNQ2 | 835 | A   | V   | NM_172107.4(KCNQ2):c.2504C>T (p.Ala835Val) | Early infantile epileptic encephalopathy with suppression bursts                                            | Uncertain significance(Last reviewed: Apr 6, 2018)  | criteria provided, single submitter                  | VCV000578192 | 20               | 63406759       | 578192      | 575130      | rs754310883  | LOF        | 0.836    | 0.061        | 0.103    |
| KCNQ2 | 842 | V   | M   | NM_172107.4(KCNQ2):c.2470G>A (p.Val824Met) | Early infantile epileptic encephalopathy with suppression bursts                                            | Uncertain significance(Last reviewed: Oct 8, 2020)  | criteria provided, single submitter                  | VCV001038229 | 20               | 63406793       | 1038229     | 1034786     | rs750108040  | LOF        | 0.823    | 0.076        | 0.101    |
| KCNQ2 | 843 | R   | K   | NM_172107.4(KCNQ2):c.2612G>A (p.Arg871Lys) | Early infantile epileptic encephalopathy with suppression bursts                                            | Uncertain significance(Last reviewed: Oct 28, 2020) | criteria provided, single submitter                  | VCV001039409 | 20               | 63406651       | 1039409     | 1034782     | rs2079942562 | LOF        | 0.849    | 0.069        | 0.082    |
| KCNQ2 | 848 | P   | L   | NM_172107.4(KCNQ2):c.2543C>T (p.Pro848Leu) | not provided Early infantile epileptic encephalopathy with suppression bursts                               | Uncertain significance(Last reviewed: Jan 3, 2022)  | criteria provided, multiple submitters, no conflicts | VCV000205935 | 20               | 63406720       | 205935      | 203693      | rs377633507  | LOF        | 0.814    | 0.086        | 0.1      |
| KCNQ2 | 852 | P   | L   | NM_172107.4(KCNQ2):c.2555C>T (p.Pro852Leu) | Early infantile epileptic encephalopathy with suppression bursts(not provided)                              | Uncertain significance(Last reviewed: Sep 1, 2021)  | criteria provided, multiple submitters, no conflicts | VCV000205936 | 20               | 63406708       | 205936      | 203692      | rs745508762  | LOF        | 0.807    | 0.088        | 0.105    |
| KCNQ2 | 854 | R   | C   | NM_172107.4(KCNQ2):c.2560C>T               | not provided Early infantile epileptic                                                                      | Benign(Last reviewed: Sep 1, 2021)                  | criteria provided, multiple submitters, no conflicts | VCV000379065 | 20               | 63406703       | 379065      | 378378      | rs373536274  | LOF        | 0.808    | 0.091        | 0.1      |

| gene  | pos | aa1 | aa2 | Name                                       | Condition(s)                                                                                                                                                  | Clinical significance (Last reviewed)                                     | Review status                                        | Accession    | GRCh38Chromosome | GRCh38Location | VariationID | AlleleID(s) | dbSNP ID     | prediction | prob.LOF | prob.Neutral | prob.GOF |
|-------|-----|-----|-----|--------------------------------------------|---------------------------------------------------------------------------------------------------------------------------------------------------------------|---------------------------------------------------------------------------|------------------------------------------------------|--------------|------------------|----------------|-------------|-------------|--------------|------------|----------|--------------|----------|
|       |     |     |     | (p.Arg854Cys)                              | encephalopathy with suppression bursts                                                                                                                        | reviewed: Sep 30, 2020)                                                   | provided, multiple submitters, no conflicts          |              |                  |                |             |             |              |            |          |              |          |
| KCNQ2 | 855 | S   | L   | NM_172107.4(KCNQ2):c.2564C>T (p.Ser855Leu) | Early infantile epileptic encephalopathy with suppression bursts Benign familial neonatal seizures 1 not provided                                             | Conflicting interpretations of pathogenicity(Last reviewed: Dec 18, 2020) | criteria provided, conflicting interpretations       | VCV000021780 | 20               | 63406699       | 21780       | 34632       | rs12481082   | LOF        | 0.832    | 0.07         | 0.098    |
| KCNQ2 | 858 | G   | S   | NM_172107.4(KCNQ2):c.2572G>A (p.Gly858Ser) | Early infantile epileptic encephalopathy with suppression bursts not provided                                                                                 | Conflicting interpretations of pathogenicity(Last reviewed: Nov 1, 2021)  | criteria provided, conflicting interpretations       | VCV000205937 | 20               | 63406691       | 205937      | 203690      | rs756609768  | LOF        | 0.79     | 0.106        | 0.104    |
| KCNQ2 | 862 | F   | L   | NM_172107.4(KCNQ2):c.2584T>C (p.Phe862Leu) | not provided                                                                                                                                                  | Uncertain significance(Last reviewed: Jan 17, 2017)                       | criteria provided, single submitter                  | VCV000205938 | 20               | 63406679       | 205938      | 203689      | rs796052662  | LOF        | 0.781    | 0.094        | 0.125    |
| KCNQ2 | 868 | A   | P   | NM_172107.4(KCNQ2):c.2602G>C (p.Ala868Pro) | not provided                                                                                                                                                  | Uncertain significance(Last reviewed: Oct 6, 2017)                        | criteria provided, single submitter                  | VCV000452658 | 20               | 63406661       | 452658      | 446281      | rs774595024  | LOF        | 0.788    | 0.108        | 0.104    |
| KCNQ2 | 871 | R   | S   | NM_172107.4(KCNQ2):c.2613G>T (p.Arg871Ser) | Benign familial neonatal seizures 1 Early infantile epileptic encephalopathy with suppression bursts Early infantile epileptic encephalopathy 7 not specified | Benign/Likely benign(Last reviewed: Oct 9, 2020)                          | criteria provided, multiple submitters, no conflicts | VCV000129343 | 20               | 63406650       | 129343      | 134789      | rs587780369  | LOF        | 0.815    | 0.097        | 0.089    |
| KCNQ3 | 1   | M   | T   | NM_004519.4(KCNQ3):c.2T>C (p.Met1Thr)      | Benign familial neonatal seizures                                                                                                                             | Uncertain significance(Last reviewed: Sep 3, 2020)                        | criteria provided, single submitter                  | VCV001059498 | 8                | 132480531      | 1059498     | 1045256     | NA           | Neutral    | 0.685    | 0.207        | 0.108    |
| KCNQ3 | 9   | M   | I   | NM_004519.4(KCNQ3):c.387G>C (p.Val129=)    | Benign familial neonatal seizures                                                                                                                             | Uncertain significance(Last reviewed: Feb 1, 2017)                        | criteria provided, single submitter                  | VCV000405214 | 8                | 132186181      | 405214      | 396571      | rs1060500604 | Neutral    | 0.707    | 0.188        | 0.106    |
| KCNQ3 | 11  | A   | V   | NM_004519.4(KCNQ3):c.32C>T (p.Ala11Val)    | Benign familial neonatal seizures                                                                                                                             | Uncertain significance(Last reviewed: Feb 2, 2019)                        | criteria provided, single submitter                  | VCV000840823 | 8                | 132480501      | 840823      | 834141      | rs1822534206 | Neutral    | 0.672    | 0.204        | 0.124    |
| KCNQ3 | 12  | A   | V   | NM_004519.4(KCNQ3):c.35C>T (p.Ala12Val)    | not specified not provided Benign familial neonatal seizures                                                                                                  | Conflicting interpretations of pathogenicity(Last reviewed: Jan 4, 2019)  | criteria provided, conflicting interpretations       | VCV000205956 | 8                | 132480498      | 205956      | 202192      | rs796052672  | Neutral    | 0.71     | 0.17         | 0.12     |
| KCNQ3 | 15  | G   | R   | NM_004519.4(KCNQ3):c.403G>C (p.Gly135Arg)  | Benign familial neonatal seizures 2                                                                                                                           | Uncertain significance(Last reviewed: Mar 5, 2019)                        | criteria provided, single submitter                  | VCV000931102 | 8                | 132186165      | 931102      | 919140      | rs1826949712 | Neutral    | 0.702    | 0.181        | 0.118    |
| KCNQ3 | 15  | G   | V   | NM_004519.4(KCNQ3):c.404G>T (p.Gly135Val)  | Benign familial neonatal seizures                                                                                                                             | Uncertain significance(Last reviewed: Aug 23, 2020)                       | criteria provided, single submitter                  | VCV001040583 | 8                | 132186164      | 1040583     | 1028294     | rs1826949634 | Neutral    | 0.681    | 0.199        | 0.12     |
| KCNQ3 | 17  | D   | N   | NM_004519.4(KCNQ3):c.49G>A (p.Asp17Asn)    | Benign familial neonatal seizures                                                                                                                             | Uncertain significance(Last reviewed: Dec 18, 2017)                       | criteria provided, single submitter                  | VCV000538548 | 8                | 132480484      | 538548      | 523494      | rs1355500787 | Neutral    | 0.653    | 0.227        | 0.12     |
| KCNQ3 | 21  | G   | R   | NM_004519.4(KCNQ3):c.61G>A (p.Gly21Arg)    | Benign familial neonatal seizures                                                                                                                             | Uncertain significance(Last reviewed: Mar 4, 2020)                        | criteria provided, single submitter                  | VCV000838374 | 8                | 132480472      | 838374      | 834140      | rs1822526871 | Neutral    | 0.716    | 0.169        | 0.115    |
| KCNQ3 | 23  | G   | S   | NM_004519.4(KCNQ3):c.67G>A (p.Gly23Ser)    | not provided                                                                                                                                                  | Uncertain significance(Last reviewed: Dec 18, 2017)                       | criteria provided, single submitter                  | VCV001163893 | 8                | 132480466      | 1163893     | 1152291     | NA           | Neutral    | 0.694    | 0.19         | 0.116    |

| gene  | pos | aa1 | aa2 | Name                                         | Condition(s)                                                 | Clinical significance (Last reviewed)               | Review status                       | Accession    | GRCh38Chromosome | GRCh38Location        | VariationID | AlleleID(s) | dbSNP ID     | prediction | prob.LOF | prob.Neutral | prob.GOF |
|-------|-----|-----|-----|----------------------------------------------|--------------------------------------------------------------|-----------------------------------------------------|-------------------------------------|--------------|------------------|-----------------------|-------------|-------------|--------------|------------|----------|--------------|----------|
|       |     |     |     |                                              |                                                              | reviewed: Jul 16, 2020)                             | submitter                           |              |                  |                       |             |             |              |            |          |              |          |
| KCNQ3 | 24  | G   | R   | NM_004519.4(KCNQ3):c.70G>A (p.Gly24Arg)      | Benign familial neonatal seizures                            | Uncertain significance(Last reviewed: Aug 10, 2020) | criteria provided, single submitter | VCV001062443 | 8                | 132480463             | 1062443     | 1045254     | NA           | Neutral    | 0.693    | 0.19         | 0.116    |
| KCNQ3 | 25  | A   | T   | NM_004519.4(KCNQ3):c.73G>A (p.Ala25Thr)      | Seizures                                                     | Uncertain significance(Last reviewed: Jun 15, 2016) | criteria provided, single submitter | VCV000587943 | 8                | 132480460             | 587943      | 579508      | rs1280461599 | Neutral    | 0.696    | 0.196        | 0.107    |
| KCNQ3 | 31  | G   | R   | NM_004519.4(KCNQ3):c.91G>A (p.Gly31Arg)      | Benign familial neonatal seizures                            | Uncertain significance(Last reviewed: Sep 3, 2019)  | criteria provided, single submitter | VCV000954939 | 8                | 132480442             | 954939      | 945855      | rs1433483426 | Neutral    | 0.712    | 0.172        | 0.116    |
| KCNQ3 | 33  | A   | V   | NM_004519.4(KCNQ3):c.98C>T (p.Ala33Val)      | Benign familial neonatal seizures                            | Uncertain significance(Last reviewed: Jan 24, 2019) | criteria provided, single submitter | VCV000835443 | 8                | 132480435             | 835443      | 834138      | rs761196042  | Neutral    | 0.683    | 0.205        | 0.112    |
| KCNQ3 | 34  | A   | E   | NM_004519.4(KCNQ3):c.101C>A (p.Ala34Glu)     | not provided                                                 | Uncertain significance(Last reviewed: Dec 1, 2019)  | criteria provided, single submitter | VCV000871939 | 8                | 132480432             | 871939      | 859650      | rs1412895282 | Neutral    | 0.718    | 0.173        | 0.109    |
| KCNQ3 | 36  | A   | P   | NM_004519.4(KCNQ3):c.105_106inv (p.Ala36Pro) | Benign familial neonatal seizures                            | Uncertain significance(Last reviewed: Oct 24, 2016) | criteria provided, single submitter | VCV000405215 | 8                | 132480427 - 132480428 | 405215      | 396572      | NA           | Neutral    | 0.695    | 0.194        | 0.111    |
| KCNQ3 | 38  | D   | E   | NM_004519.4(KCNQ3):c.114C>G (p.Asp38Glu)     | Benign familial neonatal seizures                            | Uncertain significance(Last reviewed: Oct 20, 2020) | criteria provided, single submitter | VCV001045214 | 8                | 132480419             | 1045214     | 1028296     | rs1477607835 | Neutral    | 0.667    | 0.224        | 0.109    |
| KCNQ3 | 39  | E   | G   | NM_004519.4(KCNQ3):c.116A>G (p.Glu39Gly)     | Benign familial neonatal seizures                            | Uncertain significance(Last reviewed: Jun 30, 2020) | criteria provided, single submitter | VCV001040473 | 8                | 132480417             | 1040473     | 1028295     | rs1822522895 | Neutral    | 0.66     | 0.226        | 0.113    |
| KCNQ3 | 39  | E   | Q   | NM_004519.4(KCNQ3):c.115G>C (p.Glu39Gln)     | Benign familial neonatal seizures                            | Uncertain significance(Last reviewed: Apr 23, 2019) | criteria provided, single submitter | VCV000645492 | 8                | 132480418             | 645492      | 636603      | rs1448580874 | Neutral    | 0.656    | 0.226        | 0.118    |
| KCNQ3 | 43  | V   | M   | NM_004519.4(KCNQ3):c.127G>A (p.Val43Met)     | not provided                                                 | Uncertain significance(Last reviewed: May 13, 2014) | criteria provided, single submitter | VCV000193284 | 8                | 132480406             | 193284      | 190448      | rs794726918  | Neutral    | 0.699    | 0.201        | 0.101    |
| KCNQ3 | 49  | D   | N   | NM_004519.4(KCNQ3):c.145G>A (p.Asp49Asn)     | Benign familial neonatal seizures 2 Benign Neonatal Epilepsy | Uncertain significance(Last reviewed: Jan 13, 2018) | criteria provided, single submitter | VCV000361882 | 8                | 132480388             | 361882      | 307891      | rs886062693  | Neutral    | 0.688    | 0.184        | 0.128    |
| KCNQ3 | 50  | E   | K   | NM_004519.4(KCNQ3):c.508G>A (p.Glu170Lys)    | Benign familial neonatal seizures                            | Uncertain significance(Last reviewed: May 4, 2020)  | criteria provided, single submitter | VCV001036952 | 8                | 132184337             | 1036952     | 1028292     | rs1826889658 | Neutral    | 0.706    | 0.179        | 0.115    |
| KCNQ3 | 51  | E   | D   | NM_004519.4(KCNQ3):c.153G>C (p.Glu51Asp)     | Benign familial neonatal seizures                            | Uncertain significance(Last reviewed: Mar 4, 2019)  | criteria provided, single submitter | VCV000834158 | 8                | 132480380             | 834158      | 834136      | rs1405186695 | Neutral    | 0.696    | 0.181        | 0.124    |
| KCNQ3 | 52  | Q   | E   | NM_004519.4(KCNQ3):c.154C>G (p.Gln52Glu)     | not provided                                                 | Uncertain significance(Last reviewed: Nov 30, 2016) | criteria provided, single submitter | VCV000498242 | 8                | 132480379             | 498242      | 489666      | rs1327292650 | LOF        | 0.725    | 0.146        | 0.129    |
| KCNQ3 | 57  | L   | P   | NM_004519.4(KCNQ3):c.170T>C (p.Leu57Pro)     | Benign familial neonatal seizures Benign Neonatal Epilepsy   | Uncertain significance(Last reviewed: Apr 11,       | criteria provided, multiple         | VCV000361881 | 8                | 132480363             | 361881      | 304271      | rs886062692  | LOF        | 0.811    | 0.111        | 0.079    |

| gene  | pos | aa1 | aa2 | Name                                      | Condition(s)                                             | Clinical significance (Last reviewed)               | Review status                                        | Accession    | GRCh38Chromosome | GRCh38Location | VariationID | AlleleID(s) | dbSNP ID     | prediction | prob.LOF | prob.Neutral | prob.GOF |  |
|-------|-----|-----|-----|-------------------------------------------|----------------------------------------------------------|-----------------------------------------------------|------------------------------------------------------|--------------|------------------|----------------|-------------|-------------|--------------|------------|----------|--------------|----------|--|
|       |     |     |     |                                           |                                                          | 2019)                                               | submitters, no conflicts                             |              |                  |                |             |             |              |            |          |              |          |  |
| KCNQ3 | 58  | G   | E   | NM_004519.4(KCNQ3):c.173G>A (p.Gly58Glu)  | Benign familial neonatal seizures                        | Uncertain significance(Last reviewed: Aug 8, 2019)  | criteria provided, single submitter                  | VCV000958186 | 8                | 132480360      | 958186      | 945854      | rs1822520136 | LOF        | 0.784    | 0.103        | 0.113    |  |
| KCNQ3 | 58  | G   | V   | NM_004519.4(KCNQ3):c.173G>T (p.Gly58Val)  | not provided                                             | Uncertain significance(Last reviewed: May 20, 2020) | criteria provided, single submitter                  | VCV001196914 | 8                | 132480360      | 1196914     | 1187314     | NA           | LOF        | 0.768    | 0.11         | 0.122    |  |
| KCNQ3 | 60  | G   | R   | NM_004519.4(KCNQ3):c.178G>A (p.Gly60Arg)  | Benign familial neonatal seizures                        | Uncertain significance(Last reviewed: Oct 9, 2019)  | criteria provided, single submitter                  | VCV000941767 | 8                | 132480355      | 941767      | 934097      | rs1283325203 | LOF        | 0.769    | 0.11         | 0.121    |  |
| KCNQ3 | 65  | G   | A   | NM_004519.4(KCNQ3):c.194G>C (p.Gly65Ala)  | not provided                                             | Likely pathogenic(Last reviewed: Apr 1, 2020)       | criteria provided, single submitter                  | VCV000932600 | 8                | 132480339      | 932600      | 920788      | rs1822519573 | LOF        | 0.765    | 0.123        | 0.112    |  |
| KCNQ3 | 65  | G   | R   | NM_004519.4(KCNQ3):c.193G>C (p.Gly65Arg)  | Benign familial neonatal seizures                        | Uncertain significance(Last reviewed: Jan 18, 2020) | criteria provided, single submitter                  | VCV001051202 | 8                | 132480340      | 1051202     | 1045253     | NA           | LOF        | 0.781    | 0.107        | 0.112    |  |
| KCNQ3 | 69  | G   | D   | NM_004519.4(KCNQ3):c.566G>A (p.Gly189Asp) | Benign familial neonatal seizures                        | Uncertain significance(Last reviewed: Jun 27, 2020) | criteria provided, single submitter                  | VCV001037603 | 8                | 132184279      | 1037603     | 1028291     | rs1826887156 | LOF        | 0.826    | 0.078        | 0.096    |  |
| KCNQ3 | 72  | G   | S   | NM_004519.4(KCNQ3):c.214G>A (p.Gly72Ser)  | See cases Benign familial neonatal seizures              | Uncertain significance(Last reviewed: Aug 4, 2020)  | criteria provided, multiple submitters, no conflicts | VCV000664040 | 8                | 132480319      | 664040      | 636602      | rs759310149  | Neutral    | 0.701    | 0.179        | 0.12     |  |
| KCNQ3 | 74  | R   | H   | NM_004519.4(KCNQ3):c.221G>A (p.Arg74His)  | Benign familial neonatal seizures                        | Uncertain significance(Last reviewed: Feb 18, 2020) | criteria provided, single submitter                  | VCV000962495 | 8                | 132480312      | 962495      | 945853      | rs1163071564 | Neutral    | 0.682    | 0.195        | 0.124    |  |
| KCNQ3 | 75  | D   | E   | NM_004519.4(KCNQ3):c.225C>G (p.Asp75Glu)  | Seizures Benign familial neonatal seizures not specified | Likely benign(Last reviewed: Nov 11, 2020)          | criteria provided, multiple submitters, no conflicts | VCV000205957 | 8                | 132480308      | 205957      | 202187      | rs138254004  | Neutral    | 0.679    | 0.2          | 0.121    |  |
| KCNQ3 | 84  | G   | V   | NM_004519.4(KCNQ3):c.251G>T (p.Gly84Val)  | Benign familial neonatal seizures                        | Uncertain significance(Last reviewed: Jun 26, 2020) | criteria provided, single submitter                  | VCV001015105 | 8                | 132480282      | 1015105     | 1007770     | rs781753428  | LOF        | 0.786    | 0.092        | 0.122    |  |
| KCNQ3 | 85  | I   | L   | NM_004519.4(KCNQ3):c.253A>C (p.Ile85Leu)  | Benign familial neonatal seizures                        | Uncertain significance(Last reviewed: Jul 30, 2019) | criteria provided, single submitter                  | VCV000978547 | 8                | 132480280      | 978547      | 945852      | rs969479579  | LOF        | 0.802    | 0.101        | 0.097    |  |
| KCNQ3 | 87  | L   | F   | NM_004519.4(KCNQ3):c.259C>T (p.Leu87Phe)  | Benign familial neonatal seizures                        | Uncertain significance(Last reviewed: Aug 3, 2018)  | criteria provided, single submitter                  | VCV000640814 | 8                | 132480274      | 640814      | 636601      | rs752131052  | LOF        | 0.827    | 0.087        | 0.086    |  |
| KCNQ3 | 94  | S   | R   | NM_004519.4(KCNQ3):c.282C>G (p.Ser94Arg)  | Benign familial neonatal seizures 2                      | Uncertain significance(Last reviewed: Jan 13, 2018) | criteria provided, single submitter                  | VCV000910649 | 8                | 132480251      | 910649      | 898896      | rs200519334  | LOF        | 0.769    | 0.093        | 0.138    |  |
| KCNQ3 | 98  | K   | R   | NM_004519.4(KCNQ3):c.293A>G (p.Lys98Arg)  | not provided Seizures                                    | Uncertain significance(Last reviewed: Mar 24, 2020) | criteria provided, multiple submitters, no conflicts | VCV000431878 | 8                | 132480240      | 431878      | 425778      | rs143194379  | LOF        | 0.75     | 0.11         | 0.14     |  |

| gene  | pos | aa1 | aa2 | Name                                      | Condition(s)                                                          | Clinical significance (Last reviewed)               | Review status                                        | Accession    | GRCh38Chromosome | GRCh38Location | VariationID | AlleleID(s) | dbSNP ID     | prediction | prob.LOF | prob.Neutral | prob.GOF |
|-------|-----|-----|-----|-------------------------------------------|-----------------------------------------------------------------------|-----------------------------------------------------|------------------------------------------------------|--------------|------------------|----------------|-------------|-------------|--------------|------------|----------|--------------|----------|
| KCNQ3 | 107 | R   | Q   | NM_004519.4(KCNQ3):c.680G>A (p.Arg227Gln) | Benign familial neonatal seizures 2                                   | Uncertain significance(Last reviewed: May 6, 2019)  | criteria provided, single submitter                  | VCV000975970 | 8                | 132180254      | 975970      | 964298      | rs1826712021 | LOF        | 0.838    | 0.033        | 0.129    |
| KCNQ3 | 110 | L   | F   | NM_004519.4(KCNQ3):c.330G>C (p.Leu110Phe) | not provided                                                          | Uncertain significance(Last reviewed: Jul 19, 2013) | criteria provided, single submitter                  | VCV000205958 | 8                | 132480203      | 205958      | 202186      | rs796052673  | LOF        | 0.847    | 0.064        | 0.089    |
| KCNQ3 | 110 | R   | S   | NM_004519.4(KCNQ3):c.688C>A (p.Arg230Ser) | Intellectual disability                                               | Pathogenic(Last reviewed: Apr 20, 2020)             | criteria provided, single submitter                  | VCV000978934 | 8                | 132180246      | 978934      | 966957      | rs796052676  | LOF        | 0.819    | 0.055        | 0.126    |
| KCNQ3 | 113 | D   | N   | NM_004519.4(KCNQ3):c.337G>A (p.Asp113Asn) | Benign familial neonatal seizures Benign familial neonatal seizures 2 | Uncertain significance(Last reviewed: Oct 14, 2018) | criteria provided, multiple submitters, no conflicts | VCV000665904 | 8                | 132480196      | 665904      | 636600      | rs1299548932 | LOF        | 0.845    | 0.017        | 0.137    |
| KCNQ3 | 116 | R   | C   | NM_004519.4(KCNQ3):c.706C>T (p.Arg236Cys) | Benign familial neonatal seizures                                     | Uncertain significance(Last reviewed: Aug 30, 2020) | criteria provided, single submitter                  | VCV001038319 | 8                | 132180228      | 1038319     | 1028290     | rs1180768843 | LOF        | 0.767    | 0.042        | 0.191    |
| KCNQ3 | 116 | R   | H   | NM_004519.4(KCNQ3):c.707G>A (p.Arg236His) | Benign familial neonatal seizures                                     | Uncertain significance(Last reviewed: Oct 26, 2020) | criteria provided, single submitter                  | VCV001026294 | 8                | 132180227      | 1026294     | 1007767     | rs750016305  | LOF        | 0.781    | 0.027        | 0.191    |
| KCNQ3 | 118 | P   | L   | NM_004519.4(KCNQ3):c.353C>T (p.Pro118Leu) | Benign familial neonatal seizures                                     | Uncertain significance(Last reviewed: Sep 21, 2020) | criteria provided, single submitter                  | VCV001003299 | 8                | 132480180      | 1003299     | 992558      | rs1822515868 | LOF        | 0.846    | 0.038        | 0.116    |
| KCNQ3 | 120 | G   | C   | NM_004519.4(KCNQ3):c.358G>T (p.Gly120Cys) | Benign familial neonatal seizures                                     | Uncertain significance(Last reviewed: Nov 7, 2019)  | criteria provided, single submitter                  | VCV000961761 | 8                | 132480175      | 961761      | 945851      | rs1822515624 | LOF        | 0.856    | 0.028        | 0.115    |
| KCNQ3 | 122 | R   | Q   | NM_004519.4(KCNQ3):c.725G>A (p.Arg242Gln) | not provided Benign familial neonatal seizures                        | Uncertain significance(Last reviewed: Jan 8, 2021)  | criteria provided, multiple submitters, no conflicts | VCV000934080 | 8                | 132180209      | 934080      | 934096      | rs1826708929 | LOF        | 0.818    | 0.02         | 0.161    |
| KCNQ3 | 124 | L   | V   | NM_004519.4(KCNQ3):c.370C>G (p.Leu124Val) | Benign familial neonatal seizures                                     | Uncertain significance(Last reviewed: Jan 20, 2020) | criteria provided, single submitter                  | VCV001007285 | 8                | 132480163      | 1007285     | 992557      | rs371579261  | LOF        | 0.838    | 0.071        | 0.091    |
| KCNQ3 | 125 | Y   | H   | NM_004519.4(KCNQ3):c.373T>C (p.Tyr125His) | Benign familial neonatal seizures                                     | Uncertain significance(Last reviewed: May 27, 2019) | criteria provided, single submitter                  | VCV000852826 | 8                | 132480160      | 852826      | 834135      | rs1416256789 | LOF        | 0.866    | 0.043        | 0.092    |
| KCNQ3 | 129 | L   | F   | NM_004519.4(KCNQ3):c.745C>T (p.Leu249Phe) | Benign familial neonatal seizures                                     | Uncertain significance(Last reviewed: Feb 6, 2020)  | criteria provided, single submitter                  | VCV001055480 | 8                | 132180189      | 1055480     | 1045249     | NA           | LOF        | 0.85     | 0.066        | 0.084    |
| KCNQ3 | 135 | G   | E   | NM_004519.4(KCNQ3):c.404G>A (p.Gly135Glu) | Benign familial neonatal seizures                                     | Uncertain significance(Last reviewed: Sep 20, 2020) | criteria provided, single submitter                  | VCV001062958 | 8                | 132186164      | 1062958     | 1045252     | NA           | LOF        | 0.874    | 0.035        | 0.091    |
| KCNQ3 | 137 | H   | Y   | NM_004519.4(KCNQ3):c.769C>T (p.His257Tyr) | Benign familial neonatal seizures                                     | Uncertain significance(Last reviewed: Aug 25, 2019) | criteria provided, single submitter                  | VCV000937869 | 8                | 132180165      | 937869      | 934095      | rs1826707510 | LOF        | 0.863    | 0.04         | 0.097    |
| KCNQ3 | 138 | I   | T   | NM_004519.4(KCNQ3):c.413T>C (p.Ile138Thr) | Benign familial neonatal seizures                                     | Uncertain significance(Last reviewed: Mar 15, 2020) | criteria provided, single submitter                  | VCV001042285 | 8                | 132186155      | 1042285     | 1028293     | rs367706720  | LOF        | 0.862    | 0.059        | 0.08     |



| gene  | pos | aa1 | aa2 | Name                                      | Condition(s)                                      | Clinical significance (Last reviewed)               | Review status                       | Accession    | GRCh38Chromosome | GRCh38Location | VariationID | AlleleID(s) | dbSNP ID     | prediction | prob.LOF | prob.Neutral | prob.GOF |
|-------|-----|-----|-----|-------------------------------------------|---------------------------------------------------|-----------------------------------------------------|-------------------------------------|--------------|------------------|----------------|-------------|-------------|--------------|------------|----------|--------------|----------|
| KCNQ3 | 141 | L   | F   | NM_004519.4(KCNQ3):c.781C>T (p.Leu261Phe) | not provided                                      | Uncertain significance(Last reviewed: Jun 11, 2019) | criteria provided, single submitter | VCV001303275 | 8                | 132175605      | 1303275     | 1293553     | NA           | LOF        | 0.848    | 0.064        | 0.087    |
| KCNQ3 | 141 | V   | I   | NM_004519.4(KCNQ3):c.421G>A (p.Val141Ile) | Benign familial neonatal seizures                 | Uncertain significance(Last reviewed: Sep 20, 2020) | criteria provided, single submitter | VCV000952875 | 8                | 132186147      | 952875      | 925018      | rs767730041  | LOF        | 0.836    | 0.068        | 0.096    |
| KCNQ3 | 150 | T   | N   | NM_004519.4(KCNQ3):c.449C>A (p.Thr150Asn) | Benign familial neonatal seizures                 | Uncertain significance(Last reviewed: Jul 21, 2020) | criteria provided, single submitter | VCV000579229 | 8                | 132186119      | 579229      | 567370      | rs974274243  | LOF        | 0.862    | 0.033        | 0.105    |
| KCNQ3 | 159 | V   | F   | NM_004519.4(KCNQ3):c.835G>T (p.Val279Phe) | Benign familial neonatal seizures 2               | not provided                                        | no assertion provided               | VCV001334438 | 8                | 132175551      | 1334438     | 1325333     | NA           | LOF        | 0.857    | 0.053        | 0.089    |
| KCNQ3 | 163 | E   | K   | NM_004519.4(KCNQ3):c.847G>A (p.Glu283Lys) | Benign familial neonatal seizures                 | Uncertain significance(Last reviewed: Mar 5, 2020)  | criteria provided, single submitter | VCV000663040 | 8                | 132175539      | 663040      | 636598      | rs1586801275 | LOF        | 0.862    | 0.034        | 0.104    |
| KCNQ3 | 163 | E   | Q   | NM_004519.4(KCNQ3):c.847G>C (p.Glu283Gln) | Benign familial neonatal seizures                 | Uncertain significance(Last reviewed: Oct 15, 2019) | criteria provided, single submitter | VCV000971003 | 8                | 132175539      | 971003      | 955290      | rs1586801275 | LOF        | 0.861    | 0.033        | 0.106    |
| KCNQ3 | 163 | E   | V   | NM_004519.4(KCNQ3):c.848A>T (p.Glu283Val) | Benign familial neonatal seizures 2               | Uncertain significance(Last reviewed: Jan 12, 2018) | criteria provided, single submitter | VCV000909732 | 8                | 132175538      | 909732      | 898893      | rs1826520634 | LOF        | 0.861    | 0.038        | 0.101    |
| KCNQ3 | 164 | I   | V   | NM_004519.4(KCNQ3):c.490A>G (p.Ile164Val) | Benign familial neonatal seizures                 | Uncertain significance(Last reviewed: May 29, 2019) | criteria provided, single submitter | VCV000839067 | 8                | 132184355      | 839067      | 834134      | rs1826890238 | LOF        | 0.853    | 0.056        | 0.092    |
| KCNQ3 | 166 | V   | F   | NM_004519.4(KCNQ3):c.856G>T (p.Val286Phe) | Benign familial neonatal seizures                 | Uncertain significance(Last reviewed: Oct 25, 2019) | criteria provided, single submitter | VCV000965065 | 8                | 132175530      | 965065      | 955289      | rs549372035  | LOF        | 0.855    | 0.06         | 0.085    |
| KCNQ3 | 173 | G   | V   | NM_004519.4(KCNQ3):c.878G>T (p.Gly293Val) | Benign familial neonatal seizures                 | Uncertain significance(Last reviewed: Jan 23, 2020) | criteria provided, single submitter | VCV000967531 | 8                | 132175508      | 967531      | 955288      | rs1064795142 | LOF        | 0.866    | 0.047        | 0.087    |
| KCNQ3 | 180 | F   | C   | NM_004519.4(KCNQ3):c.899T>G (p.Phe300Cys) | Benign familial neonatal seizures                 | Uncertain significance(Last reviewed: Sep 23, 2020) | criteria provided, single submitter | VCV000999329 | 8                | 132175487      | 999329      | 992556      | rs1554627439 | LOF        | 0.867    | 0.034        | 0.099    |
| KCNQ3 | 183 | R   | Q   | NM_004519.4(KCNQ3):c.548G>A (p.Arg183Gln) | Benign familial neonatal seizures                 | Uncertain significance(Last reviewed: Oct 24, 2020) | criteria provided, single submitter | VCV001062685 | 8                | 132184297      | 1062685     | 1045251     | NA           | LOF        | 0.816    | 0.042        | 0.143    |
| KCNQ3 | 185 | D   | Y   | NM_004519.4(KCNQ3):c.913G>T (p.Asp305Tyr) | not provided                                      | Likely pathogenic(Last reviewed: May 11, 2015)      | criteria provided, single submitter | VCV000427162 | 8                | 132175473      | 427162      | 415123      | rs1085307996 | LOF        | 0.831    | 0.055        | 0.113    |
| KCNQ3 | 188 | R   | W   | NM_004519.4(KCNQ3):c.562C>T (p.Arg188Trp) | not provided                                      | Uncertain significance(Last reviewed: Jan 12, 2016) | criteria provided, single submitter | VCV000206002 | 8                | 132184283      | 206002      | 202184      | rs754551218  | LOF        | 0.79     | 0.059        | 0.15     |
| KCNQ3 | 188 | W   | S   | NM_004519.4(KCNQ3):c.923G>C (p.Trp308Ser) | Benign familial neonatal seizures 2(not provided) | Likely pathogenic(Last reviewed: Mar 16, 2016)      | criteria provided, single submitter | VCV000420680 | 8                | 132175463      | 420680      | 407312      | rs1064794632 | LOF        | 0.806    | 0.075        | 0.119    |
| KCNQ3 | 190 | G   | D   | NM_004519.4(KCNQ3):c.929G>A (p.Gly310Asp) | Benign familial neonatal seizures                 | Likely pathogenic(Last reviewed: Sep 29,            | criteria provided, single submitter | VCV001067197 | 8                | 132175457      | 1067197     | 1055704     | NA           | LOF        | 0.879    | 0.021        | 0.1      |

| gene  | pos | aa1 | aa2 | Name                                       | Condition(s)                                                                                                                                                                                                                                                                            | Clinical significance (Last reviewed)                     | Review status                                        | Accession    | GRCh38Chromosome | GRCh38Location | VariationID | AlleleID(s) | dbSNP ID     | prediction | prob.LOF | prob.Neutral | prob.GOF |
|-------|-----|-----|-----|--------------------------------------------|-----------------------------------------------------------------------------------------------------------------------------------------------------------------------------------------------------------------------------------------------------------------------------------------|-----------------------------------------------------------|------------------------------------------------------|--------------|------------------|----------------|-------------|-------------|--------------|------------|----------|--------------|----------|
|       |     |     |     |                                            |                                                                                                                                                                                                                                                                                         | 2020)                                                     |                                                      |              |                  |                |             |             |              |            |          |              |          |
| KCNQ3 | 190 | R   | Q   | NM_004519.4(KCNQ3):c.569G>A (p.Arg190Gln)  | not provided                                                                                                                                                                                                                                                                            | Uncertain significance(Last reviewed: Jan 29, 2019)       | criteria provided, single submitter                  | VCV000205960 | 8                | 132184276      | 205960      | 202183      | rs796052674  | LOF        | 0.813    | 0.02         | 0.166    |
| KCNQ3 | 193 | T   | I   | NM_004519.4(KCNQ3):c.938C>T (p.Thr313Ile)  | not provided                                                                                                                                                                                                                                                                            | Likely pathogenic(Last reviewed: Aug 1, 2020)             | criteria provided, single submitter                  | VCV001012603 | 8                | 132174345      | 1012603     | 1000614     | rs1826478037 | LOF        | 0.869    | 0.02         | 0.111    |
| KCNQ3 | 196 | T   | N   | NM_004519.4(KCNQ3):c.947C>A (p.Thr316Asn)  | Benign familial neonatal seizures                                                                                                                                                                                                                                                       | Uncertain significance(Last reviewed: Jul 7, 2020)        | criteria provided, single submitter                  | VCV000999109 | 8                | 132174336      | 999109      | 992555      | rs1826477775 | LOF        | 0.802    | 0.096        | 0.102    |
| KCNQ3 | 202 | K   | Q   | NM_004519.4(KCNQ3):c.964A>C (p.Lys322Gln)  | Benign familial neonatal seizures                                                                                                                                                                                                                                                       | Uncertain significance(Last reviewed: Jul 25, 2020)       | criteria provided, single submitter                  | VCV001003471 | 8                | 132174319      | 1003471     | 992554      | rs1826477076 | LOF        | 0.84     | 0.029        | 0.131    |
| KCNQ3 | 203 | I   | T   | NM_004519.4(KCNQ3):c.608T>C (p.Ile203Thr)  | Benign familial neonatal seizures                                                                                                                                                                                                                                                       | Uncertain significance(Last reviewed: Oct 12, 2017)       | criteria provided, single submitter                  | VCV000538552 | 8                | 132180326      | 538552      | 523627      | rs1554628237 | LOF        | 0.858    | 0.063        | 0.08     |
| KCNQ3 | 203 | I   | V   | NM_004519.4(KCNQ3):c.607A>G (p.Ile203Val)  | Benign familial neonatal seizures                                                                                                                                                                                                                                                       | Uncertain significance(Last reviewed: May 4, 2020)        | criteria provided, single submitter                  | VCV001015294 | 8                | 132180327      | 1015294     | 1007768     | rs370369681  | LOF        | 0.817    | 0.088        | 0.095    |
| KCNQ3 | 210 | R   | H   | NM_004519.4(KCNQ3):c.989G>A (p.Arg330His)  | Benign familial neonatal seizures Benign familial neonatal seizures 2                                                                                                                                                                                                                   | Uncertain significance(Last reviewed: Jul 29, 2020)       | criteria provided, single submitter                  | VCV000852086 | 8                | 132174294      | 852086      | 834131      | rs1162306056 | LOF        | 0.846    | 0.04         | 0.114    |
| KCNQ3 | 210 | R   | L   | NM_004519.4(KCNQ3):c.989G>T (p.Arg330Leu)  | Benign familial neonatal seizures 2                                                                                                                                                                                                                                                     | not provided                                              | no assertion provided                                | VCV001334436 | 8                | 132174294      | 1334436     | 1325331     | NA           | LOF        | 0.828    | 0.059        | 0.113    |
| KCNQ3 | 214 | A   | T   | NM_004519.4(KCNQ3):c.640G>A (p.Ala214Thr)  | Benign familial neonatal seizures                                                                                                                                                                                                                                                       | Uncertain significance(Last reviewed: Apr 6, 2018)        | criteria provided, single submitter                  | VCV000581829 | 8                | 132180294      | 581829      | 562365      | rs1563791055 | LOF        | 0.871    | 0.043        | 0.085    |
| KCNQ3 | 219 | G   | V   | NM_004519.4(KCNQ3):c.656G>T (p.Gly219Val)  | Benign familial neonatal seizures                                                                                                                                                                                                                                                       | Uncertain significance(Last reviewed: Mar 6, 2020)        | criteria provided, single submitter                  | VCV000863246 | 8                | 132180278      | 863246      | 834133      | rs1826713982 | LOF        | 0.888    | 0.026        | 0.086    |
| KCNQ3 | 220 | G   | V   | NM_004519.4(KCNQ3):c.1019G>T (p.Gly340Val) | Benign familial neonatal seizures 2                                                                                                                                                                                                                                                     | not provided                                              | no assertion provided                                | VCV001334437 | 8                | 132174264      | 1334437     | 1325332     | NA           | LOF        | 0.871    | 0.023        | 0.106    |
| KCNQ3 | 223 | F   | S   | NM_004519.4(KCNQ3):c.1028T>C (p.Phe343Ser) | not provided                                                                                                                                                                                                                                                                            | Uncertain significance(Last reviewed: Feb 21, 2020)       | criteria provided, single submitter                  | VCV001315235 | 8                | 132174255      | 1315235     | 1305496     | NA           | LOF        | 0.898    | 0.024        | 0.077    |
| KCNQ3 | 230 | R   | C   | NM_004519.4(KCNQ3):c.688C>T (p.Arg230Cys)  | Intellectual disability Benign familial neonatal seizures Severe neurodevelopmental delay  Benign familial neonatal seizures Lennox-Gastaut syndrome Intellectual disability  Seizures, benign familial infantile, 5 Autistic behavior Benign familial neonatal seizures 2 not provided | Pathogenic/Likely pathogenic(Last reviewed: Jan 21, 2022) | criteria provided, multiple submitters, no conflicts | VCV000205963 | 8                | 132180246      | 205963      | 202181      | rs796052676  | GOF        | 0.478    | 0.044        | 0.478    |
| KCNQ3 | 230 | R   | H   | NM_004519.4(KCNQ3):c.689G>A (p.Arg230His)  | Benign familial neonatal seizures 2 Inborn genetic diseases Benign familial neonatal seizures not provided                                                                                                                                                                              | Pathogenic/Likely pathogenic(Last reviewed: Jun 19, 2020) | criteria provided, multiple submitters, no conflicts | VCV000424397 | 8                | 132180245      | 424397      | 407314      | NA           | GOF        | 0.429    | 0.037        | 0.534    |
| KCNQ3 | 236 | A   | T   | NM_004519.4(KCNQ3):c.1066G>A (p.Ala356Thr) | Benign familial neonatal seizures 2                                                                                                                                                                                                                                                     | Likely pathogenic(Last reviewed: Jun 10, 2021)            | no assertion criteria provided                       | VCV001319941 | 8                | 132172672      | 1319941     | 1310189     | NA           | GOF        | 0.667    | 0.027        | 0.305    |

| gene  | pos | aa1 | aa2 | Name                                       | Condition(s)                                                                         | Clinical significance (Last reviewed)                                     | Review status                                        | Accession    | GRCh38Chromosome | GRCh38Location | VariationID | AlleleID(s) | dbSNP ID     | prediction | prob.LOF | prob.Neutral | prob.GOF |
|-------|-----|-----|-----|--------------------------------------------|--------------------------------------------------------------------------------------|---------------------------------------------------------------------------|------------------------------------------------------|--------------|------------------|----------------|-------------|-------------|--------------|------------|----------|--------------|----------|
| KCNQ3 | 244 | R   | C   | NM_004519.4(KCNQ3):c.1090C>T (p.Arg364Cys) | Benign familial neonatal seizures                                                    | Uncertain significance(Last reviewed: Dec 10, 2018)                       | criteria provided, single submitter                  | VCV000656938 | 8                | 132172648      | 656938      | 636595      | rs1459374430 | GOF        | 0.716    | 0.042        | 0.241    |
| KCNQ3 | 244 | R   | H   | NM_004519.4(KCNQ3):c.1091G>A (p.Arg364His) | Benign familial neonatal seizures(not provided)  Benign familial neonatal seizures 2 | Conflicting interpretations of pathogenicity(Last reviewed: Mar 17, 2020) | criteria provided, conflicting interpretations       | VCV000934997 | 8                | 132172647      | 934997      | 934093      | rs1204519015 | GOF        | 0.726    | 0.027        | 0.247    |
| KCNQ3 | 247 | H   | N   | NM_004519.4(KCNQ3):c.1099C>A (p.His367Asn) | Benign familial neonatal seizures                                                    | Uncertain significance(Last reviewed: Jun 1, 2020)                        | criteria provided, single submitter                  | VCV001015596 | 8                | 132172639      | 1015596     | 1007765     | rs1826414946 | LOF        | 0.826    | 0.026        | 0.148    |
| KCNQ3 | 253 | A   | G   | NM_004519.4(KCNQ3):c.758C>G (p.Ala253Gly)  | Benign familial neonatal seizures                                                    | Uncertain significance(Last reviewed: Nov 25, 2019)                       | criteria provided, single submitter                  | VCV000860349 | 8                | 132180176      | 860349      | 834132      | rs1826707798 | LOF        | 0.83     | 0.035        | 0.135    |
| KCNQ3 | 253 | K   | T   | NM_004519.4(KCNQ3):c.1118A>C (p.Lys373Thr) | not provided                                                                         | Uncertain significance(Last reviewed: Feb 3, 2020)                        | criteria provided, single submitter                  | VCV001315047 | 8                | 132172620      | 1315047     | 1305308     | NA           | LOF        | 0.776    | 0.027        | 0.198    |
| KCNQ3 | 255 | A   | T   | NM_004519.4(KCNQ3):c.1123G>A (p.Ala375Thr) | Benign familial neonatal seizures                                                    | Likely pathogenic(Last reviewed: Jun 12, 2020)                            | criteria provided, single submitter                  | VCV001067624 | 8                | 132172615      | 1067624     | 1055703     | NA           | LOF        | 0.811    | 0.024        | 0.165    |
| KCNQ3 | 258 | L   | V   | NM_004519.4(KCNQ3):c.1132C>G (p.Leu378Val) | not provided                                                                         | Uncertain significance(Last reviewed: Oct 27, 2021)                       | criteria provided, single submitter                  | VCV001254648 | 8                | 132172606      | 1254648     | 1244581     | NA           | LOF        | 0.832    | 0.044        | 0.124    |
| KCNQ3 | 262 | A   | T   | NM_004519.4(KCNQ3):c.1144G>A (p.Ala382Thr) | Benign familial neonatal seizures                                                    | Uncertain significance(Last reviewed: Mar 4, 2020)                        | criteria provided, single submitter                  | VCV001058084 | 8                | 132170425      | 1058084     | 1045248     | NA           | LOF        | 0.88     | 0.036        | 0.083    |
| KCNQ3 | 263 | T   | M   | NM_004519.4(KCNQ3):c.788C>T (p.Thr263Met)  | Benign familial neonatal seizures(not provided)                                      | Uncertain significance(Last reviewed: May 20, 2020)                       | criteria provided, multiple submitters, no conflicts | VCV000498225 | 8                | 132175598      | 498225      | 489649      | rs1479652323 | LOF        | 0.862    | 0.024        | 0.114    |
| KCNQ3 | 266 | Y   | C   | NM_004519.4(KCNQ3):c.797A>G (p.Tyr266Cys)  | not provided                                                                         | Likely pathogenic(Last reviewed: Jan 24, 2013)                            | criteria provided, single submitter                  | VCV000205964 | 8                | 132175589      | 205964      | 202180      | rs796052677  | LOF        | 0.855    | 0.057        | 0.088    |
| KCNQ3 | 286 | V   | I   | NM_004519.4(KCNQ3):c.856G>A (p.Val286Ile)  | not provided Benign familial neonatal seizures                                       | Uncertain significance(Last reviewed: Jul 29, 2020)                       | criteria provided, multiple submitters, no conflicts | VCV000205965 | 8                | 132175530      | 205965      | 202179      | rs549372035  | LOF        | 0.847    | 0.064        | 0.09     |
| KCNQ3 | 287 | P   | L   | NM_004519.4(KCNQ3):c.860C>T (p.Pro287Leu)  | Benign familial neonatal seizures                                                    | Uncertain significance(Last reviewed: May 3, 2019)                        | criteria provided, single submitter                  | VCV000405220 | 8                | 132175526      | 405220      | 395912      | rs531151809  | LOF        | 0.83     | 0.08         | 0.09     |
| KCNQ3 | 293 | G   | E   | NM_004519.4(KCNQ3):c.878G>A (p.Gly293Glu)  | not provided                                                                         | Likely pathogenic(Last reviewed: Mar 9, 2017)                             | criteria provided, single submitter                  | VCV000421443 | 8                | 132175508      | 421443      | 407313      | rs1064795142 | LOF        | 0.794    | 0.124        | 0.082    |
| KCNQ3 | 299 | E   | K   | NM_004519.4(KCNQ3):c.895G>A (p.Glu299Lys)  | Benign familial neonatal seizures 2                                                  | not provided                                                              | no assertion provided                                | VCV000021413 | 8                | 132175491      | 21413       | 34265       | rs118192247  | LOF        | 0.888    | 0.027        | 0.085    |
| KCNQ3 | 300 | F   | S   | NM_004519.4(KCNQ3):c.899T>C (p.Phe300Ser)  | Benign familial neonatal seizures 2                                                  | Likely pathogenic(Last reviewed: Jan 1, 2018)                             | criteria provided, single submitter                  | VCV000495233 | 8                | 132175487      | 495233      | 486747      | rs1554627439 | LOF        | 0.91     | 0.03         | 0.06     |

| gene  | pos | aa1 | aa2 | Name                                       | Condition(s)                                                          | Clinical significance (Last reviewed)                    | Review status                                        | Accession    | GRCh38Chromosome | GRCh38Location | VariationID | AlleleID(s) | dbSNP ID     | prediction | prob.LOF | prob.Neutral | prob.GOF |
|-------|-----|-----|-----|--------------------------------------------|-----------------------------------------------------------------------|----------------------------------------------------------|------------------------------------------------------|--------------|------------------|----------------|-------------|-------------|--------------|------------|----------|--------------|----------|
| KCNQ3 | 305 | D   | G   | NM_004519.4(KCNQ3):c.914A>G (p.Asp305Gly)  | Benign familial neonatal seizures 2                                   | not provided                                             | no assertion provided                                | VCV000021414 | 8                | 132175472      | 21414       | 34266       | rs118192248  | LOF        | 0.884    | 0.017        | 0.098    |
| KCNQ3 | 305 | D   | V   | NM_004519.4(KCNQ3):c.914A>T (p.Asp305Val)  | Benign familial neonatal seizures                                     | Uncertain significance(Last reviewed: Sep 18, 2018)      | criteria provided, single submitter                  | VCV000571923 | 8                | 132175472      | 571923      | 561955      | rs118192248  | LOF        | 0.881    | 0.015        | 0.104    |
| KCNQ3 | 306 | A   | T   | NM_004519.4(KCNQ3):c.916G>A (p.Ala306Thr)  | Benign familial neonatal seizures                                     | Uncertain significance(Last reviewed: Oct 15, 2018)      | criteria provided, single submitter                  | VCV000659620 | 8                | 132175470      | 659620      | 636597      | rs1586801127 | LOF        | 0.908    | 0.013        | 0.079    |
| KCNQ3 | 306 | A   | V   | NM_004519.4(KCNQ3):c.917C>T (p.Ala306Val)  | not provided                                                          | Likely pathogenic(Last reviewed: Aug 1, 2016)            | criteria provided, single submitter                  | VCV000205966 | 8                | 132175469      | 205966      | 202178      | rs796052678  | LOF        | 0.901    | 0.016        | 0.083    |
| KCNQ3 | 307 | L   | S   | NM_004519.4(KCNQ3):c.1280T>C (p.Leu427Ser) | not provided Benign familial neonatal seizures                        | Uncertain significance(Last reviewed: Aug 27, 2020)      | criteria provided, multiple submitters, no conflicts | VCV001015608 | 8                | 132141314      | 1015608     | 1007764     | rs1825289329 | LOF        | 0.917    | 0.02         | 0.063    |
| KCNQ3 | 309 | W   | R   | NM_004519.4(KCNQ3):c.925T>C (p.Trp309Arg)  | Benign familial neonatal seizures 2                                   | Pathogenic(Last reviewed: Jun 1, 2000)                   | no assertion criteria provided                       | VCV000021415 | 8                | 132175461      | 21415       | 34267       | rs118192249  | LOF        | 0.901    | 0.023        | 0.076    |
| KCNQ3 | 310 | G   | V   | NM_004519.4(KCNQ3):c.929G>T (p.Gly310Val)  | Benign familial neonatal seizures 2                                   | Pathogenic(Last reviewed: Jan 1, 1998)                   | no assertion criteria provided                       | VCV000007392 | 8                | 132175457      | 7392        | 22431       | rs118192250  | LOF        | 0.897    | 0.016        | 0.087    |
| KCNQ3 | 311 | R   | H   | NM_004519.4(KCNQ3):c.1292G>A (p.Arg431His) | not provided                                                          | Uncertain significance(Last reviewed: May 24, 2021)      | criteria provided, single submitter                  | VCV001326421 | 8                | 132141302      | 1326421     | 1316781     | NA           | LOF        | 0.878    | 0.022        | 0.1      |
| KCNQ3 | 317 | I   | T   | NM_004519.4(KCNQ3):c.950T>C (p.Ile317Thr)  | Benign familial neonatal seizures Benign familial neonatal seizures 2 | Pathogenic(Last reviewed: Jul 14, 2020)                  | criteria provided, multiple submitters, no conflicts | VCV000661030 | 8                | 132174333      | 661030      | 636596      | rs1586800133 | LOF        | 0.899    | 0.034        | 0.067    |
| KCNQ3 | 319 | Y   | C   | NM_004519.4(KCNQ3):c.956A>G (p.Tyr319Cys)  | not provided                                                          | Uncertain significance(Last reviewed: Oct 1, 2017)       | criteria provided, single submitter                  | VCV000444762 | 8                | 132174327      | 444762      | 438402      | rs1554627218 | LOF        | 0.872    | 0.055        | 0.073    |
| KCNQ3 | 320 | G   | E   | NM_004519.4(KCNQ3):c.959G>A (p.Gly320Glu)  | Benign familial neonatal seizures Seizures                            | Uncertain significance(Last reviewed: Mar 6, 2018)       | criteria provided, multiple submitters, no conflicts | VCV000577120 | 8                | 132174324      | 577120      | 561951      | rs1563787894 | LOF        | 0.894    | 0.039        | 0.067    |
| KCNQ3 | 324 | P   | A   | NM_004519.4(KCNQ3):c.970C>G (p.Pro324Ala)  | Benign familial neonatal seizures                                     | Uncertain significance(Last reviewed: Oct 8, 2019)       | criteria provided, single submitter                  | VCV000941355 | 8                | 132174313      | 941355      | 934094      | rs1826476981 | LOF        | 0.905    | 0.025        | 0.07     |
| KCNQ3 | 327 | P   | T   | NM_004519.4(KCNQ3):c.1339C>A (p.Pro447Thr) | not provided                                                          | Uncertain significance(Last reviewed: Aug 29, 2019)      | criteria provided, single submitter                  | VCV001305660 | 8                | 132141255      | 1305660     | 1298253     | NA           | LOF        | 0.901    | 0.027        | 0.071    |
| KCNQ3 | 329 | N   | I   | NM_004519.4(KCNQ3):c.1346A>T (p.Asn449Ile) | Malignant tumor of prostate                                           | Uncertain significance                                   | no assertion criteria provided                       | VCV000161570 | 8                | 132141248      | 161570      | 171446      | rs193920887  | LOF        | 0.892    | 0.016        | 0.093    |
| KCNQ3 | 330 | R   | C   | NM_004519.4(KCNQ3):c.988C>T (p.Arg330Cys)  | Benign familial neonatal seizures 2 Benign familial neonatal seizures | Pathogenic/Likely pathogenic(Last reviewed: Oct 2, 2021) | criteria provided, multiple submitters, no conflicts | VCV000021417 | 8                | 132174295      | 21417       | 34269       | rs118192251  | LOF        | 0.841    | 0.03         | 0.128    |
| KCNQ3 | 332 | I   | F   | NM_004519.4(KCNQ3):c.994A>T (p.Ile332Phe)  | not provided                                                          | Likely benign(Last reviewed: Jan 18, 2018)               | criteria provided, single submitter                  | VCV000633509 | 8                | 132174289      | 633509      | 621959      | rs1563787859 | LOF        | 0.88     | 0.038        | 0.082    |

| gene  | pos | aa1 | aa2 | Name                                       | Condition(s)                                                                 | Clinical significance (Last reviewed)               | Review status                                        | Accession    | GRCh38Chromosome | GRCh38Location | VariationID | AlleleID(s) | dbSNP ID     | prediction | prob.LOF | prob.Neutral | prob.GOF |
|-------|-----|-----|-----|--------------------------------------------|------------------------------------------------------------------------------|-----------------------------------------------------|------------------------------------------------------|--------------|------------------|----------------|-------------|-------------|--------------|------------|----------|--------------|----------|
| KCNQ3 | 333 | A   | P   | NM_004519.4(KCNQ3):c.997G>C (p.Ala333Pro)  | not provided                                                                 | Uncertain significance(Last reviewed: Jan 1, 2017)  | criteria provided, single submitter                  | VCV000425449 | 8                | 132174286      | 425449      | 413783      | rs1064797349 | LOF        | 0.906    | 0.019        | 0.074    |
| KCNQ3 | 334 | A   | T   | NM_004519.4(KCNQ3):c.1000G>A (p.Ala334Thr) | Rolandic epilepsy Inborn genetic diseases  Benign familial neonatal seizures | Uncertain significance(Last reviewed: Apr 9, 2019)  | criteria provided, multiple submitters, no conflicts | VCV000433111 | 8                | 132174283      | 433111      | 426672      | rs1381851622 | LOF        | 0.881    | 0.036        | 0.083    |
| KCNQ3 | 347 | N   | D   | NM_004519.4(KCNQ3):c.1399A>G (p.Asn467Asp) | not provided                                                                 | Uncertain significance(Last reviewed: Feb 3, 2021)  | criteria provided, single submitter                  | VCV001181815 | 8                | 132141195      | 1181815     | 1171813     | NA           | LOF        | 0.874    | 0.024        | 0.102    |
| KCNQ3 | 348 | A   | V   | NM_004519.4(KCNQ3):c.1043C>T (p.Ala348Val) | not provided Benign familial neonatal seizures                               | Uncertain significance(Last reviewed: Oct 8, 2020)  | criteria provided, multiple submitters, no conflicts | VCV000205967 | 8                | 132174240      | 205967      | 202177      | rs796052679  | LOF        | 0.877    | 0.031        | 0.092    |
| KCNQ3 | 348 | N   | K   | NM_004519.4(KCNQ3):c.1404T>G (p.Asn468Lys) | Benign familial neonatal seizures                                            | Uncertain significance(Last reviewed: Jun 16, 2019) | criteria provided, single submitter                  | VCV000946362 | 8                | 132141190      | 946362      | 925017      | rs754462752  | LOF        | 0.87     | 0.019        | 0.11     |
| KCNQ3 | 348 | N   | K   | NM_004519.4(KCNQ3):c.1404T>G (p.Asn468Lys) | Benign familial neonatal seizures                                            | Uncertain significance(Last reviewed: Jun 16, 2019) | criteria provided, single submitter                  | VCV000946362 | 8                | 132141190      | 946362      | 925017      | rs754462752  | LOF        | 0.87     | 0.019        | 0.11     |
| KCNQ3 | 348 | N   | K   | NM_004519.4(KCNQ3):c.1404T>A (p.Asn468Lys) | Benign familial neonatal seizures                                            | Uncertain significance(Last reviewed: Dec 11, 2019) | criteria provided, single submitter                  | VCV000860868 | 8                | 132141190      | 860868      | 834128      | rs754462752  | LOF        | 0.87     | 0.019        | 0.11     |
| KCNQ3 | 348 | N   | K   | NM_004519.4(KCNQ3):c.1404T>A (p.Asn468Lys) | Benign familial neonatal seizures                                            | Uncertain significance(Last reviewed: Dec 11, 2019) | criteria provided, single submitter                  | VCV000860868 | 8                | 132141190      | 860868      | 834128      | rs754462752  | LOF        | 0.87     | 0.019        | 0.11     |
| KCNQ3 | 351 | R   | C   | NM_004519.4(KCNQ3):c.1411C>T (p.Arg471Cys) | not provided                                                                 | Uncertain significance(Last reviewed: Feb 1, 2020)  | criteria provided, single submitter                  | VCV001315176 | 8                | 132141183      | 1315176     | 1305437     | NA           | LOF        | 0.834    | 0.061        | 0.104    |
| KCNQ3 | 354 | G   | R   | NM_004519.4(KCNQ3):c.1060G>A (p.Gly354Arg) | not provided                                                                 | Pathogenic(Last reviewed: Oct 13, 2021)             | criteria provided, single submitter                  | VCV000449733 | 8                | 132172678      | 449733      | 444214      | rs796052680  | LOF        | 0.861    | 0.021        | 0.118    |
| KCNQ3 | 354 | G   | W   | NM_004519.4(KCNQ3):c.1060G>T (p.Gly354Trp) | not provided                                                                 | Uncertain significance(Last reviewed: Jul 28, 2014) | criteria provided, single submitter                  | VCV000205968 | 8                | 132172678      | 205968      | 202176      | rs796052680  | LOF        | 0.865    | 0.031        | 0.104    |
| KCNQ3 | 356 | A   | V   | NM_004519.4(KCNQ3):c.1067C>T (p.Ala356Val) | not provided                                                                 | Likely pathogenic(Last reviewed: Jun 15, 2017)      | criteria provided, single submitter                  | VCV000432744 | 8                | 132172671      | 432744      | 425777      | rs1554627025 | LOF        | 0.842    | 0.066        | 0.091    |
| KCNQ3 | 371 | G   | E   | NM_004519.4(KCNQ3):c.1472G>A (p.Gly491Glu) | Benign familial neonatal seizures                                            | Uncertain significance(Last reviewed: Dec 21, 2018) | criteria provided, single submitter                  | VCV000658569 | 8                | 132140172      | 658569      | 636594      | rs753920912  | Neutral    | 0.732    | 0.181        | 0.086    |
| KCNQ3 | 377 | A   | E   | NM_004519.4(KCNQ3):c.1490C>A (p.Ala497Glu) | not provided                                                                 | Uncertain significance(Last reviewed: Dec 9, 2019)  | criteria provided, single submitter                  | VCV001211402 | 8                | 132140154      | 1211402     | 1201399     | NA           | LOF        | 0.774    | 0.137        | 0.089    |
| KCNQ3 | 381 | A   | V   | NM_004519.4(KCNQ3):c.1142C>T (p.Ala381Val) | Benign familial neonatal seizures 2 Rolandic epilepsy                        | Pathogenic(Last reviewed: Jan 1, 2017)              | no assertion criteria provided                       | VCV000433110 | 8                | 132170427      | 433110      | 426671      | rs1554626549 | LOF        | 0.812    | 0.097        | 0.091    |
| KCNQ3 | 387 | P   | R   | NM_004519.4(KCNQ3):c.1520C>G               | Benign familial neonatal seizures                                            | Uncertain                                           | criteria                                             | VCV001002077 | 8                | 132140124      | 1002077     | 992553      | rs370333805  | LOF        | 0.773    | 0.137        | 0.09     |

| gene  | pos | aa1 | aa2 | Name                                                 | Condition(s)                                                                                                          | Clinical significance (Last reviewed)                                    | Review status                                        | Accession    | GRCh38Chromosome | GRCh38Location        | VariationID | AlleleID(s) | dbSNP ID     | prediction | prob.LOF | prob.Neutral | prob.GOF |
|-------|-----|-----|-----|------------------------------------------------------|-----------------------------------------------------------------------------------------------------------------------|--------------------------------------------------------------------------|------------------------------------------------------|--------------|------------------|-----------------------|-------------|-------------|--------------|------------|----------|--------------|----------|
|       |     |     |     | (p.Pro507Arg)                                        |                                                                                                                       | significance(Last reviewed: Oct 6, 2020)                                 | provided, single submitter                           |              |                  |                       |             |             |              |            |          |              |          |
| KCNQ3 | 393 | I   | T   | NM_004519.4(KCNQ3):c.1178T>C (p.Ile393Thr)           | Benign familial neonatal seizures Benign familial neonatal seizures 2                                                 | Uncertain significance(Last reviewed: Oct 31, 2018)                      | criteria provided, multiple submitters, no conflicts | VCV000570705 | 8                | 132170391             | 570705      | 564638      | rs201814804  | LOF        | 0.756    | 0.15         | 0.093    |
| KCNQ3 | 400 | R   | K   | NM_004519.4(KCNQ3):c.1199G>A (p.Arg400Lys)           | Benign familial neonatal seizures Benign familial neonatal seizures 2                                                 | Uncertain significance(Last reviewed: Jan 8, 2020)                       | criteria provided, multiple submitters, no conflicts | VCV000471214 | 8                | 132170370             | 471214      | 457193      | rs943073757  | Neutral    | 0.726    | 0.174        | 0.1      |
| KCNQ3 | 403 | E   | K   | NM_004519.4(KCNQ3):c.1207G>A (p.Glu403Lys)           | Benign familial neonatal seizures                                                                                     | Uncertain significance(Last reviewed: Oct 16, 2019)                      | criteria provided, single submitter                  | VCV000070789 | 8                | 132170362             | 70789       | 81680       | rs142445773  | Neutral    | 0.741    | 0.164        | 0.095    |
| KCNQ3 | 403 | R   | G   | NM_004519.4(KCNQ3):c.1567A>G (p.Arg523Gly)           | not provided                                                                                                          | Uncertain significance(Last reviewed: Oct 15, 2019)                      | criteria provided, single submitter                  | VCV001309235 | 8                | 132140077             | 1309235     | 1299934     | NA           | Neutral    | 0.733    | 0.17         | 0.097    |
| KCNQ3 | 406 | V   | I   | NM_004519.4(KCNQ3):c.1216G>A (p.Val406Ile)           | not provided Benign familial neonatal seizures  Benign familial neonatal seizures 2 Seizures                          | Conflicting interpretations of pathogenicity(Last reviewed: Nov 8, 2018) | criteria provided, conflicting interpretations       | VCV000205969 | 8                | 132170353             | 205969      | 202174      | rs144474368  | LOF        | 0.84     | 0.067        | 0.093    |
| KCNQ3 | 408 | R   | C   | NM_004519.4(KCNQ3):c.1582C>T (p.Arg528Cys)           | Benign familial neonatal seizures 2 Benign familial neonatal seizures                                                 | Uncertain significance(Last reviewed: Oct 13, 2020)                      | criteria provided, multiple submitters, no conflicts | VCV001034514 | 8                | 132138003             | 1034514     | 1028288     | rs1393085163 | Neutral    | 0.694    | 0.208        | 0.099    |
| KCNQ3 | 409 | P   | R   | NM_004519.4(KCNQ3):c.1226C>G (p.Pro409Arg)           | not provided Benign familial neonatal seizures  Benign familial neonatal seizures 2                                   | Conflicting interpretations of pathogenicity(Last reviewed: Oct 9, 2020) | criteria provided, conflicting interpretations       | VCV000205970 | 8                | 132170343             | 205970      | 202173      | rs149272208  | Neutral    | 0.666    | 0.24         | 0.095    |
| KCNQ3 | 410 | Y   | H   | NM_004519.4(KCNQ3):c.1588T>C (p.Tyr530His)           | Benign familial neonatal seizures                                                                                     | Uncertain significance(Last reviewed: Aug 30, 2018)                      | criteria provided, single submitter                  | VCV000644020 | 8                | 132137997             | 644020      | 636592      | rs781350596  | Neutral    | 0.699    | 0.21         | 0.091    |
| KCNQ3 | 414 | E   | G   | NM_004519.4(KCNQ3):c.1241A>G (p.Glu414Gly)           | Benign familial neonatal seizures 2 Benign familial neonatal seizures Benign Neonatal Epilepsy Seizures not specified | Benign(Last reviewed: Dec 5, 2020)                                       | criteria provided, multiple submitters, no conflicts | VCV000021409 | 8                | 132163489             | 21409       | 34261       | rs2303995    | Neutral    | 0.678    | 0.233        | 0.089    |
| KCNQ3 | 417 | E   | M   | NM_004519.4(KCNQ3):c.1249_1250delinsAT (p.Glu417Met) | Benign familial neonatal seizures 2 not specified                                                                     | Uncertain significance(Last reviewed: Oct 31, 2018)                      | criteria provided, multiple submitters, no conflicts | VCV000450849 | 8                | 132163480 - 132163481 | 450849      | 444213      | rs1554625699 | Neutral    | 0.61     | 0.292        | 0.098    |
| KCNQ3 | 422 | D   | G   | NM_004519.4(KCNQ3):c.1625A>G (p.Asp542Gly)           | not provided                                                                                                          | Uncertain significance(Last reviewed: May 6, 2019)                       | criteria provided, single submitter                  | VCV001305364 | 8                | 132137960             | 1305364     | 1295639     | NA           | Neutral    | 0.531    | 0.367        | 0.101    |
| KCNQ3 | 422 | D   | N   | NM_004519.4(KCNQ3):c.1624G>A (p.Asp542Asn)           | Benign familial neonatal seizures                                                                                     | Uncertain significance(Last reviewed: Jul 14, 2019)                      | criteria provided, single submitter                  | VCV000940181 | 8                | 132137961             | 940181      | 934091      | rs1005759975 | Neutral    | 0.511    | 0.383        | 0.107    |
| KCNQ3 | 428 | E   | D   | NM_004519.4(KCNQ3):c.1644G>T (p.Glu548Asp)           | not provided                                                                                                          | Uncertain significance(Last reviewed: Apr 9, 2020)                       | criteria provided, single submitter                  | VCV001191192 | 8                | 132137941             | 1191192     | 1180410     | NA           | Neutral    | 0.56     | 0.34         | 0.101    |

| gene  | pos | aa1 | aa2 | Name                                       | Condition(s)                                                                         | Clinical significance (Last reviewed)                                    | Review status                                        | Accession    | GRCh38Chromosome | GRCh38Location | VariationID | AlleleID(s) | dbSNP ID     | prediction | prob.LOF | prob.Neutral | prob.GOF |
|-------|-----|-----|-----|--------------------------------------------|--------------------------------------------------------------------------------------|--------------------------------------------------------------------------|------------------------------------------------------|--------------|------------------|----------------|-------------|-------------|--------------|------------|----------|--------------|----------|
| KCNQ3 | 433 | G   | R   | NM_004519.4(KCNQ3):c.1657G>A (p.Gly553Arg) | Benign familial neonatal seizures 2 Intellectual disability                          | Uncertain significance(Last reviewed: Apr 20, 2020)                      | criteria provided, single submitter                  | VCV000978935 | 8                | 132137928      | 978935      | 966956      | rs1825159081 | Neutral    | 0.615    | 0.288        | 0.097    |
| KCNQ3 | 443 | Y   | F   | NM_004519.4(KCNQ3):c.1688A>T (p.Tyr563Phe) | Benign familial neonatal seizures                                                    | Uncertain significance(Last reviewed: Jun 6, 2020)                       | criteria provided, single submitter                  | VCV001054424 | 8                | 132137897      | 1054424     | 1045247     | NA           | Neutral    | 0.651    | 0.259        | 0.09     |
| KCNQ3 | 446 | T   | M   | NM_004519.4(KCNQ3):c.1697C>T (p.Thr566Met) | not provided Benign familial neonatal seizures                                       | Uncertain significance(Last reviewed: Jan 23, 2020)                      | criteria provided, multiple submitters, no conflicts | VCV000853636 | 8                | 132137888      | 853636      | 834124      | rs746403693  | Neutral    | 0.631    | 0.267        | 0.102    |
| KCNQ3 | 449 | D   | G   | NM_004519.4(KCNQ3):c.1706A>G (p.Asp569Gly) | not provided                                                                         | Uncertain significance(Last reviewed: Jul 8, 2021)                       | criteria provided, single submitter                  | VCV001313762 | 8                | 132134383      | 1313762     | 1304023     | NA           | Neutral    | 0.543    | 0.361        | 0.096    |
| KCNQ3 | 450 | M   | I   | NM_004519.4(KCNQ3):c.1710G>A (p.Met570Ile) | Benign familial neonatal seizures                                                    | Uncertain significance(Last reviewed: Jun 12, 2020)                      | criteria provided, single submitter                  | VCV001016296 | 8                | 132134379      | 1016296     | 1007763     | rs375264509  | Neutral    | 0.666    | 0.236        | 0.098    |
| KCNQ3 | 454 | P   | R   | NM_004519.4(KCNQ3):c.1721C>G (p.Pro574Arg) | not provided                                                                         | Uncertain significance(Last reviewed: Oct 10, 2019)                      | criteria provided, single submitter                  | VCV001311782 | 8                | 132134368      | 1311782     | 1302313     | NA           | Neutral    | 0.575    | 0.329        | 0.096    |
| KCNQ3 | 455 | E   | Q   | NM_004519.4(KCNQ3):c.1363G>C (p.Glu455Gln) | Benign familial neonatal seizures                                                    | Uncertain significance(Last reviewed: Jan 27, 2020)                      | criteria provided, single submitter                  | VCV000852958 | 8                | 132141231      | 852958      | 834129      | rs1338855011 | Neutral    | 0.524    | 0.376        | 0.1      |
| KCNQ3 | 455 | G   | R   | NM_004519.4(KCNQ3):c.1723G>A (p.Gly575Arg) | Benign familial neonatal seizures                                                    | Uncertain significance(Last reviewed: Oct 30, 2019)                      | criteria provided, single submitter                  | VCV000951413 | 8                | 132134366      | 951413      | 925016      | rs755560218  | Neutral    | 0.589    | 0.315        | 0.096    |
| KCNQ3 | 456 | P   | R   | NM_004519.4(KCNQ3):c.1727C>G (p.Pro576Arg) | not provided                                                                         | Uncertain significance(Last reviewed: Jan 24, 2020)                      | criteria provided, single submitter                  | VCV001312683 | 8                | 132134362      | 1312683     | 1302944     | NA           | Neutral    | 0.625    | 0.282        | 0.093    |
| KCNQ3 | 459 | T   | M   | NM_004519.4(KCNQ3):c.1736C>T (p.Thr579Met) | Benign familial neonatal seizures                                                    | Uncertain significance(Last reviewed: Oct 19, 2018)                      | criteria provided, single submitter                  | VCV000660000 | 8                | 132134353      | 660000      | 636591      | rs761487326  | Neutral    | 0.624    | 0.28         | 0.096    |
| KCNQ3 | 464 | V   | A   | NM_004519.4(KCNQ3):c.1391T>C (p.Val464Ala) | Intellectual disability(not provided) Benign familial neonatal seizures              | Likely benign(Last reviewed: Jan 12, 2021)                               | criteria provided, multiple submitters, no conflicts | VCV000205952 | 8                | 132141203      | 205952      | 202172      | rs143664009  | Neutral    | 0.655    | 0.253        | 0.092    |
| KCNQ3 | 468 | G   | A   | NM_004519.4(KCNQ3):c.1763G>C (p.Gly588Ala) | Benign familial neonatal seizures                                                    | Uncertain significance(Last reviewed: Mar 30, 2020)                      | criteria provided, single submitter                  | VCV001056432 | 8                | 132134326      | 1056432     | 1045246     | NA           | Neutral    | 0.543    | 0.351        | 0.106    |
| KCNQ3 | 468 | N   | S   | NM_004519.4(KCNQ3):c.1403A>G (p.Asn468Ser) | Benign familial neonatal seizures(not provided)  Benign familial neonatal seizures 2 | Conflicting interpretations of pathogenicity(Last reviewed: Oct 1, 2020) | criteria provided, conflicting interpretations       | VCV000021410 | 8                | 132141191      | 21410       | 34262       | rs118192252  | Neutral    | 0.477    | 0.404        | 0.119    |
| KCNQ3 | 469 | S   | L   | NM_004519.4(KCNQ3):c.1766C>T (p.Ser589Leu) | Benign familial neonatal seizures                                                    | Uncertain significance(Last reviewed: May 6, 2020)                       | criteria provided, single submitter                  | VCV001024659 | 8                | 132134323      | 1024659     | 1007762     | rs1824994797 | Neutral    | 0.612    | 0.289        | 0.099    |
| KCNQ3 | 470 | A   | V   | NM_004519.4(KCNQ3):c.1769C>T (p.Ala590Val) | Benign familial neonatal seizures                                                    | Uncertain significance(Last reviewed: Nov 1, 2019)                       | criteria provided, single submitter                  | VCV000960588 | 8                | 132134320      | 960588      | 945850      | rs1824994259 | Neutral    | 0.711    | 0.195        | 0.094    |

| gene  | pos | aa1 | aa2 | Name                                       | Condition(s)                                                                        | Clinical significance (Last reviewed)                                     | Review status                                        | Accession    | GRCh38Chromosome | GRCh38Location | VariationID | AlleleID(s) | dbSNP ID     | prediction | prob.LOF | prob.Neutral | prob.GOF |
|-------|-----|-----|-----|--------------------------------------------|-------------------------------------------------------------------------------------|---------------------------------------------------------------------------|------------------------------------------------------|--------------|------------------|----------------|-------------|-------------|--------------|------------|----------|--------------|----------|
| KCNQ3 | 471 | R   | P   | NM_004519.4(KCNQ3):c.1412G>C (p.Arg471Pro) | Benign familial neonatal seizures                                                   | Uncertain significance(Last reviewed: Feb 24, 2020)                       | criteria provided, single submitter                  | VCV000853692 | 8                | 132141182      | 853692      | 834127      | rs1198584017 | Neutral    | 0.675    | 0.233        | 0.092    |
| KCNQ3 | 473 | R   | H   | NM_004519.4(KCNQ3):c.1418G>A (p.Arg473His) | Benign familial neonatal seizures                                                   | Uncertain significance(Last reviewed: May 20, 2020)                       | criteria provided, single submitter                  | VCV001042515 | 8                | 132141176      | 1042515     | 1028289     | rs138181943  | Neutral    | 0.726    | 0.184        | 0.09     |
| KCNQ3 | 474 | T   | M   | NM_004519.4(KCNQ3):c.1421C>T (p.Thr474Met) | not provided Benign familial neonatal seizures  Benign familial neonatal seizures 2 | Conflicting interpretations of pathogenicity(Last reviewed: Oct 24, 2020) | criteria provided, conflicting interpretations       | VCV000205971 | 8                | 132141173      | 205971      | 202171      | rs757583944  | LOF        | 0.785    | 0.122        | 0.093    |
| KCNQ3 | 477 | R   | H   | NM_004519.4(KCNQ3):c.1430G>A (p.Arg477His) | Benign familial neonatal seizures                                                   | Uncertain significance(Last reviewed: Nov 2, 2018)                        | criteria provided, single submitter                  | VCV000538550 | 8                | 132141164      | 538550      | 523492      | rs141821338  | LOF        | 0.746    | 0.156        | 0.098    |
| KCNQ3 | 481 | N   | K   | NM_004519.4(KCNQ3):c.1803T>G (p.Asn601Lys) | Benign familial neonatal seizures                                                   | Uncertain significance(Last reviewed: Sep 9, 2020)                        | criteria provided, single submitter                  | VCV001014603 | 8                | 132132261      | 1014603     | 1007761     | rs1469007568 | Neutral    | 0.587    | 0.314        | 0.099    |
| KCNQ3 | 486 | S   | R   | NM_004519.4(KCNQ3):c.1458T>A (p.Ser486Arg) | not provided                                                                        | Uncertain significance(Last reviewed: Jan 26, 2016)                       | criteria provided, single submitter                  | VCV000285490 | 8                | 132141136      | 285490      | 269727      | rs886043116  | Neutral    | 0.625    | 0.282        | 0.093    |
| KCNQ3 | 491 | G   | R   | NM_004519.4(KCNQ3):c.1471G>A (p.Gly491Arg) | Benign familial neonatal seizures not provided                                      | Uncertain significance(Last reviewed: Nov 11, 2019)                       | criteria provided, multiple submitters, no conflicts | VCV000279818 | 8                | 132140173      | 279818      | 264363      | rs201552546  | Neutral    | 0.609    | 0.296        | 0.095    |
| KCNQ3 | 493 | I   | T   | NM_004519.4(KCNQ3):c.1838T>C (p.Ile613Thr) | Benign familial neonatal seizures                                                   | Uncertain significance(Last reviewed: Mar 24, 2020)                       | criteria provided, single submitter                  | VCV001001990 | 8                | 132132226      | 1001990     | 992552      | rs1488846886 | Neutral    | 0.645    | 0.262        | 0.093    |
| KCNQ3 | 497 | A   | T   | NM_004519.4(KCNQ3):c.1489G>A (p.Ala497Thr) | Benign familial neonatal seizures not provided                                      | Conflicting interpretations of pathogenicity(Last reviewed: Jan 19, 2021) | criteria provided, conflicting interpretations       | VCV000661154 | 8                | 132140155      | 661154      | 636593      | rs368279666  | Neutral    | 0.602    | 0.304        | 0.094    |
| KCNQ3 | 497 | A   | V   | NM_004519.4(KCNQ3):c.1490C>T (p.Ala497Val) | Benign familial neonatal seizures                                                   | Uncertain significance(Last reviewed: Dec 13, 2019)                       | criteria provided, single submitter                  | VCV000863207 | 8                | 132140154      | 863207      | 834126      | rs1048969639 | Neutral    | 0.647    | 0.26         | 0.094    |
| KCNQ3 | 503 | G   | R   | NM_004519.4(KCNQ3):c.1507G>A (p.Gly503Arg) | not provided Benign familial neonatal seizures  Benign familial neonatal seizures 2 | Conflicting interpretations of pathogenicity(Last reviewed: Aug 4, 2020)  | criteria provided, conflicting interpretations       | VCV000205972 | 8                | 132140137      | 205972      | 202170      | rs773584143  | Neutral    | 0.6      | 0.299        | 0.1      |
| KCNQ3 | 507 | P   | A   | NM_004519.4(KCNQ3):c.1519C>G (p.Pro507Ala) | Benign familial neonatal seizures                                                   | Uncertain significance(Last reviewed: May 29, 2019)                       | criteria provided, single submitter                  | VCV000839066 | 8                | 132140125      | 839066      | 834125      | rs1480684032 | Neutral    | 0.724    | 0.192        | 0.084    |
| KCNQ3 | 509 | E   | K   | NM_004519.4(KCNQ3):c.1525G>A (p.Glu509Lys) | Benign familial neonatal seizures                                                   | Uncertain significance(Last reviewed: Aug 1, 2018)                        | criteria provided, single submitter                  | VCV000570800 | 8                | 132140119      | 570800      | 564636      | rs774311301  | Neutral    | 0.741    | 0.174        | 0.085    |
| KCNQ3 | 510 | D   | A   | NM_004519.4(KCNQ3):c.1529A>C (p.Asp510Ala) | not provided                                                                        | Uncertain significance(Last reviewed: Apr 7, 2017)                        | criteria provided, single submitter                  | VCV000501097 | 8                | 132140115      | 501097      | 492521      | rs1554622841 | Neutral    | 0.735    | 0.18         | 0.084    |
| KCNQ3 | 510 | Q   | K   | NM_004519.4(KCNQ3):c.1888C>A (p.Gln630Lys) | Benign familial neonatal seizures                                                   | Uncertain significance(Last reviewed: Apr 7, 2017)                        | criteria provided, single submitter                  | VCV000838296 | 8                | 132129993      | 838296      | 834122      | rs1466449283 | Neutral    | 0.74     | 0.176        | 0.084    |



| gene  | pos | aa1 | aa2 | Name                                       | Condition(s)                                                                        | Clinical significance (Last reviewed)                                    | Review status                                        | Accession    | GRCh38Chromosome | GRCh38Location | VariationID | AlleleID(s) | dbSNP ID     | prediction | prob.LOF | prob.Neutral | prob.GOF |
|-------|-----|-----|-----|--------------------------------------------|-------------------------------------------------------------------------------------|--------------------------------------------------------------------------|------------------------------------------------------|--------------|------------------|----------------|-------------|-------------|--------------|------------|----------|--------------|----------|
|       |     |     |     |                                            |                                                                                     | reviewed: Dec 19, 2019)                                                  | submitter                                            |              |                  |                |             |             |              |            |          |              |          |
| KCNQ3 | 511 | M   | V   | NM_004519.4(KCNQ3):c.1531A>G (p.Met511Val) | not specified                                                                       | Uncertain significance(Last reviewed: May 20, 2016)                      | criteria provided, single submitter                  | VCV000279819 | 8                | 132140113      | 279819      | 264260      | rs200219106  | LOF        | 0.766    | 0.147        | 0.088    |
| KCNQ3 | 513 | P   | L   | NM_004519.4(KCNQ3):c.1538C>T (p.Pro513Leu) | not provided                                                                        | Uncertain significance(Last reviewed: Feb 5, 2013)                       | criteria provided, single submitter                  | VCV000205973 | 8                | 132140106      | 205973      | 202169      | rs768520561  | LOF        | 0.757    | 0.156        | 0.087    |
| KCNQ3 | 515 | L   | V   | NM_004519.4(KCNQ3):c.1543C>G (p.Leu515Val) | Benign familial neonatal seizures not provided                                      | Uncertain significance(Last reviewed: Aug 27, 2019)                      | criteria provided, multiple submitters, no conflicts | VCV000288032 | 8                | 132140101      | 288032      | 272269      | rs368013249  | LOF        | 0.842    | 0.077        | 0.082    |
| KCNQ3 | 517 | A   | T   | NM_004519.4(KCNQ3):c.1549G>A (p.Ala517Thr) | Benign familial neonatal seizures                                                   | Likely benign(Last reviewed: Dec 21, 2017)                               | criteria provided, single submitter                  | VCV000538558 | 8                | 132140095      | 538558      | 523257      | rs1554622834 | LOF        | 0.817    | 0.1          | 0.084    |
| KCNQ3 | 518 | A   | T   | NM_004519.4(KCNQ3):c.1552G>A (p.Ala518Thr) | Benign familial neonatal seizures not specified                                     | Uncertain significance(Last reviewed: Aug 2, 2020)                       | criteria provided, multiple submitters, no conflicts | VCV000447643 | 8                | 132140092      | 447643      | 441170      | rs745463637  | LOF        | 0.82     | 0.102        | 0.079    |
| KCNQ3 | 521 | A   | G   | NM_004519.4(KCNQ3):c.1562C>G (p.Ala521Gly) | not specified                                                                       | Uncertain significance(Last reviewed: Dec 7, 2016)                       | criteria provided, single submitter                  | VCV000373612 | 8                | 132140082      | 373612      | 359694      | rs1057518505 | LOF        | 0.837    | 0.09         | 0.072    |
| KCNQ3 | 522 | V   | I   | NM_004519.4(KCNQ3):c.1564G>A (p.Val522Ile) | not provided Benign familial neonatal seizures  Benign familial neonatal seizures 2 | Conflicting interpretations of pathogenicity(Last reviewed: Nov 2, 2020) | criteria provided, conflicting interpretations       | VCV000193878 | 8                | 132140080      | 193878      | 191041      | rs143683496  | LOF        | 0.848    | 0.064        | 0.088    |
| KCNQ3 | 531 | K   | E   | NM_004519.4(KCNQ3):c.1591A>G (p.Lys531Glu) | not provided Benign familial neonatal seizures 2                                    | Uncertain significance(Last reviewed: Sep 30, 2019)                      | criteria provided, multiple submitters, no conflicts | VCV000205974 | 8                | 132137994      | 205974      | 202167      | rs796052681  | LOF        | 0.779    | 0.133        | 0.088    |
| KCNQ3 | 538 | Y   | C   | NM_004519.4(KCNQ3):c.1973A>G (p.Tyr658Cys) | Intellectual disability                                                             | Likely benign(Last reviewed: Jan 1, 2019)                                | no assertion criteria provided                       | VCV000975565 | 8                | 132129908      | 975565      | 963645      | rs1423597114 | LOF        | 0.804    | 0.108        | 0.088    |
| KCNQ3 | 538 | Y   | N   | NM_004519.4(KCNQ3):c.1972T>A (p.Tyr658Asn) | Benign familial neonatal seizures                                                   | Uncertain significance(Last reviewed: Mar 30, 2020)                      | criteria provided, single submitter                  | VCV001040197 | 8                | 132129909      | 1040197     | 1028285     | rs1824811259 | LOF        | 0.842    | 0.08         | 0.078    |
| KCNQ3 | 539 | R   | S   | NM_004519.4(KCNQ3):c.1617G>C (p.Arg539Ser) | not specified                                                                       | Uncertain significance(Last reviewed: Sep 19, 2016)                      | criteria provided, single submitter                  | VCV000447644 | 8                | 132137968      | 447644      | 441169      | rs140607300  | LOF        | 0.744    | 0.159        | 0.097    |
| KCNQ3 | 552 | K   | E   | NM_004519.4(KCNQ3):c.2014A>G (p.Lys672Glu) | Benign familial neonatal seizures 2                                                 | Uncertain significance(Last reviewed: Jan 12, 2018)                      | criteria provided, single submitter                  | VCV000909669 | 8                | 132129867      | 909669      | 898886      | rs554613662  | LOF        | 0.824    | 0.029        | 0.147    |
| KCNQ3 | 555 | N   | S   | NM_004519.4(KCNQ3):c.2024A>G (p.Asn675Ser) | Benign familial neonatal seizures                                                   | Uncertain significance(Last reviewed: Jun 15, 2019)                      | criteria provided, single submitter                  | VCV000654846 | 8                | 132129857      | 654846      | 636588      | rs1586750924 | LOF        | 0.863    | 0.027        | 0.11     |
| KCNQ3 | 556 | R   | G   | NM_004519.4(KCNQ3):c.2026A>G (p.Arg676Gly) | Benign familial neonatal seizures                                                   | Uncertain significance(Last reviewed: Jan 2, 2020)                       | criteria provided, single submitter                  | VCV001006098 | 8                | 132129855      | 1006098     | 992551      | rs1307554348 | LOF        | 0.805    | 0.045        | 0.15     |
| KCNQ3 | 562 | T   | A   | NM_004519.4(KCNQ3):c.2044A>G               | Benign familial neonatal seizures                                                   | Uncertain                                                                | criteria                                             | VCV000660237 | 8                | 132129837      | 660237      | 636587      | rs768163501  | LOF        | 0.842    | 0.026        | 0.132    |

| gene  | pos | aa1 | aa2 | Name                                       | Condition(s)                                                                                                                                                   | Clinical significance (Last reviewed)               | Review status                                        | Accession    | GRCh38Chromosome | GRCh38Location | VariationID | AlleleID(s) | dbSNP ID     | prediction | prob.LOF | prob.Neutral | prob.GOF |
|-------|-----|-----|-----|--------------------------------------------|----------------------------------------------------------------------------------------------------------------------------------------------------------------|-----------------------------------------------------|------------------------------------------------------|--------------|------------------|----------------|-------------|-------------|--------------|------------|----------|--------------|----------|
|       |     |     |     | (p.Thr682Ala)                              |                                                                                                                                                                | significance(Last reviewed: Oct 9, 2018)            | provided, single submitter                           |              |                  |                |             |             |              |            |          |              |          |
| KCNQ3 | 565 | Q   | R   | NM_004519.4(KCNQ3):c.1694A>G (p.Gln565Arg) | not provided                                                                                                                                                   | Uncertain significance(Last reviewed: Jul 17, 2017) | criteria provided, single submitter                  | VCV000450476 | 8                | 132137891      | 450476      | 444212      | rs1003860988 | LOF        | 0.837    | 0.023        | 0.139    |
| KCNQ3 | 570 | M   | T   | NM_004519.4(KCNQ3):c.1709T>C (p.Met570Thr) | not provided Benign familial neonatal seizures 2                                                                                                               | Uncertain significance(Last reviewed: Jun 1, 2021)  | criteria provided, multiple submitters, no conflicts | VCV000205975 | 8                | 132134380      | 205975      | 202165      | rs199999939  | LOF        | 0.847    | 0.069        | 0.084    |
| KCNQ3 | 573 | P   | L   | NM_004519.4(KCNQ3):c.2078C>T (p.Pro693Leu) | Benign familial neonatal seizures                                                                                                                              | Uncertain significance(Last reviewed: Sep 24, 2020) | criteria provided, single submitter                  | VCV000937870 | 8                | 132129803      | 937870      | 934090      | rs755177673  | LOF        | 0.762    | 0.141        | 0.097    |
| KCNQ3 | 574 | P   | S   | NM_004519.4(KCNQ3):c.1720C>T (p.Pro574Ser) | Benign familial neonatal seizures 2 Seizures  Benign Neonatal Epilepsy Intellectual disability  Benign familial neonatal seizures(not provided)  not specified | Benign/Likely benign(Last reviewed: Dec 5, 2020)    | criteria provided, multiple submitters, no conflicts | VCV000021411 | 8                | 132134369      | 21411       | 34263       | rs74582884   | Neutral    | 0.726    | 0.141        | 0.133    |
| KCNQ3 | 574 | P   | T   | NM_004519.4(KCNQ3):c.1720C>A (p.Pro574Thr) | not provided Inborn genetic diseases Benign familial neonatal seizures                                                                                         | Uncertain significance(Last reviewed: Jun 28, 2021) | criteria provided, multiple submitters, no conflicts | VCV000205976 | 8                | 132134369      | 205976      | 202163      | rs74582884   | Neutral    | 0.724    | 0.143        | 0.133    |
| KCNQ3 | 578 | S   | N   | NM_004519.4(KCNQ3):c.2093G>A (p.Ser698Asn) | not provided                                                                                                                                                   | Uncertain significance(Last reviewed: Apr 2, 2019)  | criteria provided, single submitter                  | VCV001308484 | 8                | 132129788      | 1308484     | 1297105     | NA           | Neutral    | 0.626    | 0.234        | 0.14     |
| KCNQ3 | 592 | T   | S   | NM_004519.4(KCNQ3):c.1775C>G (p.Thr592Ser) | Benign familial neonatal seizures                                                                                                                              | Uncertain significance(Last reviewed: Mar 28, 2019) | criteria provided, single submitter                  | VCV000471218 | 8                | 132134314      | 471218      | 457798      | rs556421495  | Neutral    | 0.574    | 0.29         | 0.136    |
| KCNQ3 | 594 | P   | S   | NM_004519.4(KCNQ3):c.1780C>T (p.Pro594Ser) | Benign familial neonatal seizures not provided                                                                                                                 | Uncertain significance(Last reviewed: Aug 30, 2019) | criteria provided, multiple submitters, no conflicts | VCV000646535 | 8                | 132134309      | 646535      | 636590      | rs868191966  | Neutral    | 0.615    | 0.257        | 0.129    |
| KCNQ3 | 595 | S   | P   | NM_004519.4(KCNQ3):c.1783T>C (p.Ser595Pro) | not provided                                                                                                                                                   | Uncertain significance(Last reviewed: Jun 3, 2019)  | criteria provided, single submitter                  | VCV000424010 | 8                | 132134306      | 424010      | 407311      | rs1064796743 | Neutral    | 0.576    | 0.269        | 0.154    |
| KCNQ3 | 600 | R   | K   | NM_004519.4(KCNQ3):c.1799G>A (p.Arg600Lys) | Benign familial neonatal seizures                                                                                                                              | Uncertain significance(Last reviewed: Sep 20, 2018) | criteria provided, single submitter                  | VCV000471219 | 8                | 132134290      | 471219      | 457187      | rs1554622023 | Neutral    | 0.61     | 0.261        | 0.129    |
| KCNQ3 | 604 | Y   | N   | NM_004519.4(KCNQ3):c.1810T>A (p.Tyr604Asn) | Benign familial neonatal seizures                                                                                                                              | Uncertain significance(Last reviewed: May 16, 2018) | criteria provided, single submitter                  | VCV000405219 | 8                | 132132254      | 405219      | 395900      | rs1060500606 | Neutral    | 0.577    | 0.317        | 0.105    |
| KCNQ3 | 608 | G   | A   | NM_004519.4(KCNQ3):c.2183G>C (p.Gly728Ala) | Benign familial neonatal seizures                                                                                                                              | Uncertain significance(Last reviewed: Nov 26, 2019) | criteria provided, single submitter                  | VCV000860624 | 8                | 132129698      | 860624      | 834120      | rs1824797413 | Neutral    | 0.56     | 0.279        | 0.161    |
| KCNQ3 | 615 | D   | G   | NM_004519.4(KCNQ3):c.1844A>G (p.Asp615Gly) | Benign familial neonatal seizures                                                                                                                              | Uncertain significance(Last reviewed: Sep 20, 2020) | criteria provided, single submitter                  | VCV000205977 | 8                | 132132220      | 205977      | 202162      | rs777180732  | Neutral    | 0.686    | 0.21         | 0.104    |
| KCNQ3 | 617 | S   | T   | NM_004519.4(KCNQ3):c.1850G>C (p.Ser617Thr) | not provided                                                                                                                                                   | Uncertain significance(Last reviewed: Jan 9,        | criteria provided, single submitter                  | VCV000205979 | 8                | 132132214      | 205979      | 202161      | rs758002609  | LOF        | 0.776    | 0.094        | 0.13     |

| gene  | pos | aa1 | aa2 | Name                                       | Condition(s)                                                                                                          | Clinical significance (Last reviewed)                                     | Review status                                        | Accession    | GRCh38Chromosome | GRCh38Location | VariationID | AlleleID(s) | dbSNP ID     | prediction | prob.LOF | prob.Neutral | prob.GOF |
|-------|-----|-----|-----|--------------------------------------------|-----------------------------------------------------------------------------------------------------------------------|---------------------------------------------------------------------------|------------------------------------------------------|--------------|------------------|----------------|-------------|-------------|--------------|------------|----------|--------------|----------|
|       |     |     |     |                                            |                                                                                                                       | 2013)                                                                     |                                                      |              |                  |                |             |             |              |            |          |              |          |
| KCNQ3 | 629 | V   | F   | NM_004519.4(KCNQ3):c.1885G>T (p.Val629Phe) | not provided                                                                                                          | Uncertain significance(Last reviewed: Nov 1, 2013)                        | criteria provided, single submitter                  | VCV000205980 | 8                | 132129996      | 205980      | 202159      | rs185511111  | LOF        | 0.857    | 0.068        | 0.074    |
| KCNQ3 | 629 | V   | I   | NM_004519.4(KCNQ3):c.1885G>A (p.Val629Ile) | Benign familial neonatal seizures not provided                                                                        | Conflicting interpretations of pathogenicity(Last reviewed: Jun 22, 2021) | criteria provided, conflicting interpretations       | VCV000449145 | 8                | 132129996      | 449145      | 444211      | rs185511111  | LOF        | 0.849    | 0.073        | 0.078    |
| KCNQ3 | 629 | V   | L   | NM_004519.4(KCNQ3):c.1885G>C (p.Val629Leu) | Benign familial neonatal seizures not provided  Benign familial neonatal seizures 2 not specified Rolandic epilepsy   | Uncertain significance(Last reviewed: Sep 18, 2020)                       | criteria provided, multiple submitters, no conflicts | VCV000206003 | 8                | 132129996      | 206003      | 202160      | rs185511111  | LOF        | 0.852    | 0.07         | 0.078    |
| KCNQ3 | 630 | I   | V   | NM_004519.4(KCNQ3):c.2248A>G (p.Ile750Val) | Benign familial neonatal seizures                                                                                     | Uncertain significance(Last reviewed: Apr 16, 2019)                       | criteria provided, single submitter                  | VCV000852113 | 8                | 132129633      | 852113      | 834119      | rs776413259  | LOF        | 0.808    | 0.1          | 0.092    |
| KCNQ3 | 640 | V   | M   | NM_004519.4(KCNQ3):c.1918G>A (p.Val640Met) | not provided Benign familial neonatal seizures                                                                        | Uncertain significance(Last reviewed: Mar 22, 2017)                       | criteria provided, multiple submitters, no conflicts | VCV000405217 | 8                | 132129963      | 405217      | 396288      | rs767903815  | LOF        | 0.866    | 0.055        | 0.079    |
| KCNQ3 | 647 | M   | I   | NM_004519.4(KCNQ3):c.1941G>A (p.Met647Ile) | Benign familial neonatal seizures 2 Benign familial neonatal seizures                                                 | Uncertain significance(Last reviewed: Mar 28, 2019)                       | criteria provided, multiple submitters, no conflicts | VCV000571968 | 8                | 132129940      | 571968      | 562352      | rs1227129126 | LOF        | 0.815    | 0.098        | 0.087    |
| KCNQ3 | 647 | M   | L   | NM_004519.4(KCNQ3):c.1939A>T (p.Met647Leu) | Benign familial neonatal seizures                                                                                     | Uncertain significance(Last reviewed: Oct 3, 2019)                        | criteria provided, single submitter                  | VCV000952842 | 8                | 132129942      | 952842      | 925015      | rs1274926731 | LOF        | 0.812    | 0.101        | 0.087    |
| KCNQ3 | 649 | R   | W   | NM_004519.4(KCNQ3):c.1945C>T (p.Arg649Trp) | not provided                                                                                                          | Uncertain significance(Last reviewed: Jan 1, 2018)                        | criteria provided, single submitter                  | VCV000547040 | 8                | 132129936      | 547040      | 537529      | rs770863845  | LOF        | 0.733    | 0.149        | 0.118    |
| KCNQ3 | 653 | Q   | R   | NM_004519.4(KCNQ3):c.1958A>G (p.Gln653Arg) | Benign familial neonatal seizures Benign familial neonatal seizures 2 Benign Neonatal Epilepsy not specified Seizures | Benign/Likely benign(Last reviewed: Nov 16, 2020)                         | criteria provided, multiple submitters, no conflicts | VCV000205981 | 8                | 132129923      | 205981      | 202158      | rs554833870  | LOF        | 0.787    | 0.099        | 0.114    |
| KCNQ3 | 654 | I   | V   | NM_004519.4(KCNQ3):c.2320A>G (p.Ile774Val) | Benign familial neonatal seizures                                                                                     | Uncertain significance(Last reviewed: Sep 14, 2018)                       | criteria provided, single submitter                  | VCV000663775 | 8                | 132129561      | 663775      | 636586      | rs1284135753 | LOF        | 0.821    | 0.096        | 0.084    |
| KCNQ3 | 655 | T   | M   | NM_004519.4(KCNQ3):c.1964C>T (p.Thr655Met) | Benign familial neonatal seizures not provided                                                                        | Likely benign(Last reviewed: Nov 10, 2020)                                | criteria provided, multiple submitters, no conflicts | VCV000378036 | 8                | 132129917      | 378036      | 371511      | rs199942237  | Neutral    | 0.704    | 0.189        | 0.107    |
| KCNQ3 | 659 | R   | K   | NM_004519.4(KCNQ3):c.2336G>A (p.Arg779Lys) | Benign familial neonatal seizures                                                                                     | Uncertain significance(Last reviewed: Jul 7, 2020)                        | criteria provided, single submitter                  | VCV001017095 | 8                | 132129545      | 1017095     | 1007760     | rs746006725  | Neutral    | 0.619    | 0.233        | 0.148    |
| KCNQ3 | 662 | I   | V   | NM_004519.4(KCNQ3):c.2344A>G (p.Ile782Val) | Benign familial neonatal seizures                                                                                     | Uncertain significance(Last reviewed: Mar 6, 2020)                        | criteria provided, single submitter                  | VCV000863332 | 8                | 132129537      | 863332      | 834117      | rs1391097567 | Neutral    | 0.625    | 0.258        | 0.118    |
| KCNQ3 | 665 | S   | L   | NM_004519.4(KCNQ3):c.1994C>T (p.Ser665Leu) | Seizures Benign familial neonatal seizures not provided Benign familial neonatal seizures 2                           | Conflicting interpretations of pathogenicity(Last reviewed: Nov 13,       | criteria provided, conflicting interpretations       | VCV000194513 | 8                | 132129887      | 194513      | 191676      | rs147173555  | Neutral    | 0.56     | 0.307        | 0.133    |

| gene  | pos | aa1 | aa2 | Name                                       | Condition(s)                                                                         | Clinical significance (Last reviewed)                                    | Review status                                        | Accession    | GRCh38Chromosome | GRCh38Location | VariationID | AlleleID(s) | dbSNP ID     | prediction | prob.LOF | prob.Neutral | prob.GOF |
|-------|-----|-----|-----|--------------------------------------------|--------------------------------------------------------------------------------------|--------------------------------------------------------------------------|------------------------------------------------------|--------------|------------------|----------------|-------------|-------------|--------------|------------|----------|--------------|----------|
|       |     |     |     |                                            |                                                                                      | 2020)                                                                    |                                                      |              |                  |                |             |             |              |            |          |              |          |
| KCNQ3 | 666 | S   | T   | NM_004519.4(KCNQ3):c.2357G>C (p.Ser786Thr) | not provided                                                                         | Uncertain significance(Last reviewed: Jan 23, 2020)                      | criteria provided, single submitter                  | VCV001311477 | 8                | 132129524      | 1311477     | 1299534     | NA           | Neutral    | 0.554    | 0.284        | 0.162    |
| KCNQ3 | 669 | A   | T   | NM_004519.4(KCNQ3):c.2005G>A (p.Ala669Thr) | Benign familial neonatal seizures                                                    | Uncertain significance(Last reviewed: Oct 22, 2018)                      | criteria provided, single submitter                  | VCV000205982 | 8                | 132129876      | 205982      | 202157      | rs201812160  | Neutral    | 0.586    | 0.292        | 0.121    |
| KCNQ3 | 679 | D   | N   | NM_004519.4(KCNQ3):c.2035G>A (p.Asp679Asn) | not provided                                                                         | Uncertain significance(Last reviewed: Jan 24, 2017)                      | criteria provided, single submitter                  | VCV000393167 | 8                | 132129846      | 393167      | 371509      | rs773672399  | Neutral    | 0.618    | 0.238        | 0.144    |
| KCNQ3 | 680 | L   | V   | NM_004519.4(KCNQ3):c.2038T>G (p.Leu680Val) | Benign familial neonatal seizures                                                    | Uncertain significance(Last reviewed: Oct 1, 2018)                       | criteria provided, single submitter                  | VCV000478607 | 8                | 132129843      | 478607      | 458186      | rs1223253841 | Neutral    | 0.715    | 0.187        | 0.098    |
| KCNQ3 | 686 | N   | S   | NM_004519.4(KCNQ3):c.2057A>G (p.Asn686Ser) | Benign familial neonatal seizures                                                    | Uncertain significance(Last reviewed: Apr 3, 2019)                       | criteria provided, single submitter                  | VCV000837953 | 8                | 132129824      | 837953      | 834121      | rs779744869  | LOF        | 0.744    | 0.133        | 0.123    |
| KCNQ3 | 687 | Y   | F   | NM_004519.4(KCNQ3):c.2060A>T (p.Tyr687Phe) | Benign familial neonatal seizures                                                    | Uncertain significance(Last reviewed: Jun 6, 2019)                       | criteria provided, single submitter                  | VCV000948423 | 8                | 132129821      | 948423      | 925014      | rs757584140  | Neutral    | 0.672    | 0.229        | 0.099    |
| KCNQ3 | 691 | G   | D   | NM_004519.4(KCNQ3):c.2072G>A (p.Gly691Asp) | Benign familial neonatal seizures(not provided)                                      | Uncertain significance(Last reviewed: Nov 14, 2019)                      | criteria provided, multiple submitters, no conflicts | VCV000570094 | 8                | 132129809      | 570094      | 561949      | rs758790946  | Neutral    | 0.653    | 0.209        | 0.138    |
| KCNQ3 | 691 | G   | S   | NM_004519.4(KCNQ3):c.2071G>A (p.Gly691Ser) | Benign familial neonatal seizures(not provided)  Benign familial neonatal seizures 2 | Benign/Likely benign(Last reviewed: Mar 20, 2020)                        | criteria provided, multiple submitters, no conflicts | VCV000205983 | 8                | 132129810      | 205983      | 202156      | rs747379988  | Neutral    | 0.642    | 0.205        | 0.153    |
| KCNQ3 | 692 | D   | N   | NM_004519.4(KCNQ3):c.2434G>A (p.Asp812Asn) | not provided                                                                         | Uncertain significance(Last reviewed: Dec 16, 2020)                      | criteria provided, single submitter                  | VCV001205319 | 8                | 132129447      | 1205319     | 1194013     | NA           | Neutral    | 0.584    | 0.264        | 0.152    |
| KCNQ3 | 692 | P   | A   | NM_004519.4(KCNQ3):c.2074C>G (p.Pro692Ala) | Benign familial neonatal seizures 2(not provided)                                    | Uncertain significance(Last reviewed: Jul 2, 2018)                       | criteria provided, multiple submitters, no conflicts | VCV000429488 | 8                | 132129807      | 429488      | 421658      | rs1131691408 | Neutral    | 0.571    | 0.291        | 0.138    |
| KCNQ3 | 695 | P   | L   | NM_004519.4(KCNQ3):c.2084C>T (p.Pro695Leu) | Benign familial neonatal seizures                                                    | Uncertain significance(Last reviewed: Feb 24, 2020)                      | criteria provided, single submitter                  | VCV000572531 | 8                | 132129797      | 572531      | 561947      | rs760983146  | Neutral    | 0.57     | 0.307        | 0.123    |
| KCNQ3 | 696 | P   | T   | NM_004519.4(KCNQ3):c.2086C>A (p.Pro696Thr) | Benign familial neonatal seizures(not provided)                                      | Uncertain significance(Last reviewed: Apr 14, 2020)                      | criteria provided, multiple submitters, no conflicts | VCV000810313 | 8                | 132129795      | 810313      | 796120      | rs1055327554 | Neutral    | 0.621    | 0.233        | 0.146    |
| KCNQ3 | 708 | S   | I   | NM_004519.4(KCNQ3):c.2123G>T (p.Ser708Ile) | not provided Benign familial neonatal seizures                                       | Conflicting interpretations of pathogenicity(Last reviewed: Jun 6, 2020) | criteria provided, conflicting interpretations       | VCV000413257 | 8                | 132129758      | 413257      | 396570      | rs977989588  | Neutral    | 0.66     | 0.201        | 0.139    |
| KCNQ3 | 710 | Y   | C   | NM_004519.4(KCNQ3):c.2129A>G (p.Tyr710Cys) | Benign familial neonatal seizures 2 Benign familial neonatal seizures                | Conflicting interpretations of pathogenicity(Last reviewed: Sep 17,      | criteria provided, conflicting interpretations       | VCV000405216 | 8                | 132129752      | 405216      | 396563      | rs1060500605 | Neutral    | 0.605    | 0.288        | 0.107    |

| gene  | pos | aa1 | aa2 | Name                                       | Condition(s)                                                                                   | Clinical significance (Last reviewed)                                     | Review status                                        | Accession    | GRCh38Chromosome | GRCh38Location | VariationID | AlleleID(s) | dbSNP ID     | prediction | prob.LOF | prob.Neutral | prob.GOF |
|-------|-----|-----|-----|--------------------------------------------|------------------------------------------------------------------------------------------------|---------------------------------------------------------------------------|------------------------------------------------------|--------------|------------------|----------------|-------------|-------------|--------------|------------|----------|--------------|----------|
|       |     |     |     |                                            |                                                                                                | 2020)                                                                     |                                                      |              |                  |                |             |             |              |            |          |              |          |
| KCNQ3 | 710 | Y   | H   | NM_004519.4(KCNQ3):c.2128T>C (p.Tyr710His) | Benign familial neonatal seizures(not provided)                                                | Likely benign(Last reviewed: Dec 31, 2019)                                | criteria provided, multiple submitters, no conflicts | VCV000205984 | 8                | 132129753      | 205984      | 202155      | rs181746838  | Neutral    | 0.598    | 0.286        | 0.117    |
| KCNQ3 | 715 | H   | R   | NM_004519.4(KCNQ3):c.2144A>G (p.His715Arg) | not provided Benign familial neonatal seizures                                                 | Conflicting interpretations of pathogenicity(Last reviewed: Oct 21, 2020) | criteria provided, conflicting interpretations       | VCV000205985 | 8                | 132129737      | 205985      | 202154      | rs112314858  | Neutral    | 0.61     | 0.27         | 0.121    |
| KCNQ3 | 716 | D   | H   | NM_004519.4(KCNQ3):c.2146G>C (p.Asp716His) | not provided Benign familial neonatal seizures                                                 | Conflicting interpretations of pathogenicity(Last reviewed: Jul 16, 2020) | criteria provided, conflicting interpretations       | VCV000205986 | 8                | 132129735      | 205986      | 202153      | rs149324120  | Neutral    | 0.624    | 0.234        | 0.142    |
| KCNQ3 | 716 | G   | D   | NM_004519.4(KCNQ3):c.2507G>A (p.Gly836Asp) | Benign familial neonatal seizures                                                              | Uncertain significance(Last reviewed: Dec 16, 2019)                       | criteria provided, single submitter                  | VCV000835624 | 8                | 132129374      | 835624      | 834115      | rs894796810  | Neutral    | 0.647    | 0.22         | 0.133    |
| KCNQ3 | 722 | R   | Q   | NM_004519.4(KCNQ3):c.2165G>A (p.Arg722Gln) | Benign familial neonatal seizures Benign familial neonatal seizures 2 Benign Neonatal Epilepsy | Uncertain significance(Last reviewed: May 29, 2019)                       | criteria provided, multiple submitters, no conflicts | VCV000361874 | 8                | 132129716      | 361874      | 313013      | rs377725346  | Neutral    | 0.574    | 0.294        | 0.132    |
| KCNQ3 | 723 | G   | E   | NM_004519.4(KCNQ3):c.2168G>A (p.Gly723Glu) | Benign familial neonatal seizures Seizures(not specified) Benign familial neonatal seizures 2  | Benign(Last reviewed: Nov 23, 2020)                                       | criteria provided, multiple submitters, no conflicts | VCV000138050 | 8                | 132129713      | 138050      | 141753      | rs142149782  | Neutral    | 0.598    | 0.274        | 0.128    |
| KCNQ3 | 732 | A   | T   | NM_004519.4(KCNQ3):c.2194G>A (p.Ala732Thr) | not provided                                                                                   | Uncertain significance(Last reviewed: Jan 28, 2014)                       | criteria provided, single submitter                  | VCV000205987 | 8                | 132129687      | 205987      | 202152      | rs796052682  | Neutral    | 0.589    | 0.299        | 0.112    |
| KCNQ3 | 740 | T   | M   | NM_004519.4(KCNQ3):c.2219C>T (p.Thr740Met) | Benign familial neonatal seizures 2 Benign familial neonatal seizures                          | Uncertain significance(Last reviewed: Feb 24, 2020)                       | criteria provided, multiple submitters, no conflicts | VCV000579852 | 8                | 132129662      | 579852      | 564635      | rs764065145  | Neutral    | 0.573    | 0.309        | 0.119    |
| KCNQ3 | 742 | V   | G   | NM_004519.4(KCNQ3):c.2225T>G (p.Val742Gly) | not specified                                                                                  | Uncertain significance(Last reviewed: Dec 1, 2016)                        | criteria provided, single submitter                  | VCV000372609 | 8                | 132129656      | 372609      | 359887      | rs1057517883 | Neutral    | 0.649    | 0.259        | 0.092    |
| KCNQ3 | 743 | S   | A   | NM_004519.4(KCNQ3):c.2587T>G (p.Ser863Ala) | not provided                                                                                   | Uncertain significance(Last reviewed: Jun 10, 2019)                       | criteria provided, single submitter                  | VCV001306085 | 8                | 132129294      | 1306085     | 1297356     | NA           | Neutral    | 0.613    | 0.242        | 0.144    |
| KCNQ3 | 744 | V   | I   | NM_004519.4(KCNQ3):c.2590G>A (p.Val864Ile) | Benign familial neonatal seizures                                                              | Uncertain significance(Last reviewed: Oct 8, 2020)                        | criteria provided, single submitter                  | VCV001058710 | 8                | 132129291      | 1058710     | 1045241     | NA           | Neutral    | 0.666    | 0.226        | 0.108    |
| KCNQ3 | 746 | T   | M   | NM_004519.4(KCNQ3):c.2237C>T (p.Thr746Met) | not provided Benign familial neonatal seizures                                                 | Conflicting interpretations of pathogenicity(Last reviewed: Apr 7, 2021)  | criteria provided, conflicting interpretations       | VCV000430518 | 8                | 132129644      | 430518      | 421657      | rs375833070  | Neutral    | 0.645    | 0.224        | 0.131    |
| KCNQ3 | 747 | V   | F   | NM_004519.4(KCNQ3):c.2239G>T (p.Val747Phe) | Benign familial neonatal seizures                                                              | Uncertain significance(Last reviewed: Oct 14, 2020)                       | criteria provided, single submitter                  | VCV000570729 | 8                | 132129642      | 570729      | 567365      | rs1563761711 | Neutral    | 0.693    | 0.205        | 0.101    |
| KCNQ3 | 755 | D   | N   | NM_004519.4(KCNQ3):c.2263G>A (p.Asp755Asn) | Benign familial neonatal seizures(not provided) Rolandic epilepsy Seizures Benign familial     | Benign/Likely benign(Last reviewed:                                       | criteria provided,                                   | VCV000205988 | 8                | 132129618      | 205988      | 202151      | rs150821246  | Neutral    | 0.591    | 0.281        | 0.128    |

| gene  | pos | aa1 | aa2 | Name                                       | Condition(s)                                                                                                                       | Clinical significance (Last reviewed)                                     | Review status                                        | Accession    | GRCh38Chromosome | GRCh38Location | VariationID | AlleleID(s) | dbSNP ID     | prediction | prob.LOF | prob.Neutral | prob.GOF |
|-------|-----|-----|-----|--------------------------------------------|------------------------------------------------------------------------------------------------------------------------------------|---------------------------------------------------------------------------|------------------------------------------------------|--------------|------------------|----------------|-------------|-------------|--------------|------------|----------|--------------|----------|
|       |     |     |     |                                            | neonatal seizures 2                                                                                                                | Jun 4, 2021)                                                              | multiple submitters, no conflicts                    |              |                  |                |             |             |              |            |          |              |          |
| KCNQ3 | 757 | R   | Q   | NM_004519.4(KCNQ3):c.2270G>A (p.Arg757Gln) | Benign familial neonatal seizures                                                                                                  | Uncertain significance(Last reviewed: Sep 2, 2020)                        | criteria provided, single submitter                  | VCV000852618 | 8                | 132129611      | 852618      | 834118      | rs769248820  | Neutral    | 0.601    | 0.282        | 0.117    |
| KCNQ3 | 765 | D   | E   | NM_004519.4(KCNQ3):c.2295C>A (p.Asp765Glu) | Benign familial neonatal seizures                                                                                                  | Uncertain significance(Last reviewed: Jun 5, 2020)                        | criteria provided, single submitter                  | VCV000935235 | 8                | 132129586      | 935235      | 934089      | rs201183533  | Neutral    | 0.554    | 0.311        | 0.134    |
| KCNQ3 | 769 | P   | H   | NM_004519.4(KCNQ3):c.2306C>A (p.Pro769His) | Benign Neonatal Epilepsy Benign familial neonatal seizures not specified Benign familial neonatal seizures 2 not provided Seizures | Benign/Likely benign(Last reviewed: Dec 2, 2020)                          | criteria provided, multiple submitters, no conflicts | VCV000138051 | 8                | 132129575      | 138051      | 141754      | rs114095081  | Neutral    | 0.564    | 0.304        | 0.132    |
| KCNQ3 | 773 | R   | Q   | NM_004519.4(KCNQ3):c.2318G>A (p.Arg773Gln) | not provided Benign familial neonatal seizures                                                                                     | Conflicting interpretations of pathogenicity(Last reviewed: Jun 7, 2021)  | criteria provided, conflicting interpretations       | VCV000205989 | 8                | 132129563      | 205989      | 202150      | rs769160647  | Neutral    | 0.554    | 0.312        | 0.134    |
| KCNQ3 | 777 | R   | Q   | NM_004519.4(KCNQ3):c.2330G>A (p.Arg777Gln) | Benign familial neonatal seizures Seizures not provided Benign familial neonatal seizures 2                                        | Conflicting interpretations of pathogenicity(Last reviewed: Nov 22, 2020) | criteria provided, conflicting interpretations       | VCV000205990 | 8                | 132129551      | 205990      | 202149      | rs201328910  | Neutral    | 0.553    | 0.31         | 0.137    |
| KCNQ3 | 777 | R   | W   | NM_004519.4(KCNQ3):c.2329C>T (p.Arg777Trp) | Benign familial neonatal seizures                                                                                                  | Uncertain significance(Last reviewed: Sep 12, 2018)                       | criteria provided, single submitter                  | VCV000647590 | 8                | 132129552      | 647590      | 636585      | rs776128068  | Neutral    | 0.582    | 0.317        | 0.101    |
| KCNQ3 | 780 | R   | C   | NM_004519.4(KCNQ3):c.2338C>T (p.Arg780Cys) | not provided Benign familial neonatal seizures 2 Benign familial neonatal seizures                                                 | Conflicting interpretations of pathogenicity(Last reviewed: Jul 12, 2020) | criteria provided, conflicting interpretations       | VCV000405218 | 8                | 132129543      | 405218      | 395898      | rs138852641  | Neutral    | 0.584    | 0.317        | 0.099    |
| KCNQ3 | 780 | R   | H   | NM_004519.4(KCNQ3):c.2339G>A (p.Arg780His) | Benign familial neonatal seizures                                                                                                  | Uncertain significance(Last reviewed: Sep 25, 2020)                       | criteria provided, single submitter                  | VCV000205991 | 8                | 132129542      | 205991      | 202148      | rs747235713  | Neutral    | 0.548    | 0.341        | 0.11     |
| KCNQ3 | 784 | R   | Q   | NM_004519.4(KCNQ3):c.2351G>A (p.Arg784Gln) | not provided                                                                                                                       | Likely benign(Last reviewed: Feb 28, 2019)                                | criteria provided, single submitter                  | VCV000205992 | 8                | 132129530      | 205992      | 202147      | rs754896169  | Neutral    | 0.567    | 0.293        | 0.14     |
| KCNQ3 | 794 | S   | L   | NM_004519.4(KCNQ3):c.2381C>T (p.Ser794Leu) | Seizures Benign familial neonatal seizures                                                                                         | Uncertain significance(Last reviewed: May 30, 2020)                       | criteria provided, multiple submitters, no conflicts | VCV000077175 | 8                | 132129500      | 77175       | 88066       | rs267601778  | Neutral    | 0.638    | 0.247        | 0.115    |
| KCNQ3 | 795 | V   | I   | NM_004519.4(KCNQ3):c.2383G>A (p.Val795Ile) | not provided Benign familial neonatal seizures                                                                                     | Uncertain significance(Last reviewed: Nov 10, 2017)                       | criteria provided, multiple submitters, no conflicts | VCV000205993 | 8                | 132129498      | 205993      | 202146      | rs764544537  | Neutral    | 0.676    | 0.231        | 0.093    |
| KCNQ3 | 796 | N   | D   | NM_004519.4(KCNQ3):c.2386A>G (p.Asn796Asp) | Benign familial neonatal seizures                                                                                                  | Uncertain significance(Last reviewed: Jun 4, 2020)                        | criteria provided, single submitter                  | VCV000644399 | 8                | 132129495      | 644399      | 636584      | rs1289523204 | Neutral    | 0.629    | 0.245        | 0.126    |
| KCNQ3 | 798 | E   | A   | NM_004519.4(KCNQ3):c.2393A>C (p.Glu798Ala) | Benign familial neonatal seizures                                                                                                  | Uncertain significance(Last reviewed: Jul 2, 2018)                        | criteria provided, single submitter                  | VCV000568547 | 8                | 132129488      | 568547      | 564632      | rs1563761409 | Neutral    | 0.595    | 0.281        | 0.124    |
| KCNQ3 | 808 | S   | N   | NM_004519.4(KCNQ3):c.2423G>A (p.Ser808Asn) | Benign familial neonatal seizures                                                                                                  | Uncertain significance(Last reviewed: Jan 4,                              | criteria provided, single submitter                  | VCV000538553 | 8                | 132129458      | 538553      | 523623      | rs1554621319 | Neutral    | 0.652    | 0.22         | 0.128    |

| gene  | pos | aa1 | aa2 | Name                                       | Condition(s)                                                                                                         | Clinical significance (Last reviewed)                                     | Review status                                        | Accession    | GRCh38Chromosome | GRCh38Location | VariationID | AlleleID(s) | dbSNP ID     | prediction | prob.LOF | prob.Neutral | prob.GOF |
|-------|-----|-----|-----|--------------------------------------------|----------------------------------------------------------------------------------------------------------------------|---------------------------------------------------------------------------|------------------------------------------------------|--------------|------------------|----------------|-------------|-------------|--------------|------------|----------|--------------|----------|
|       |     |     |     |                                            |                                                                                                                      | 2018)                                                                     |                                                      |              |                  |                |             |             |              |            |          |              |          |
| KCNQ3 | 815 | D   | Y   | NM_004519.4(KCNQ3):c.2443G>T (p.Asp815Tyr) | Benign familial neonatal seizures not provided                                                                       | Uncertain significance(Last reviewed: Nov 29, 2018)                       | criteria provided, multiple submitters, no conflicts | VCV000205994 | 8                | 132129438      | 205994      | 202145      | rs530506549  | Neutral    | 0.567    | 0.314        | 0.118    |
| KCNQ3 | 819 | G   | S   | NM_004519.4(KCNQ3):c.2455G>A (p.Gly819Ser) | Benign familial neonatal seizures                                                                                    | Uncertain significance(Last reviewed: Oct 25, 2018)                       | criteria provided, single submitter                  | VCV000471224 | 8                | 132129426      | 471224      | 457816      | rs540574784  | Neutral    | 0.6      | 0.281        | 0.119    |
| KCNQ3 | 821 | N   | S   | NM_004519.4(KCNQ3):c.2462A>G (p.Asn821Ser) | not provided Benign familial neonatal seizures 2 Benign Neonatal Epilepsy Seizures Benign familial neonatal seizures | Conflicting interpretations of pathogenicity(Last reviewed: Mar 24, 2021) | criteria provided, conflicting interpretations       | VCV000021412 | 8                | 132129419      | 21412       | 34264       | rs118192254  | Neutral    | 0.555    | 0.312        | 0.132    |
| KCNQ3 | 823 | G   | R   | NM_004519.4(KCNQ3):c.2467G>A (p.Gly823Arg) | Seizures                                                                                                             | Uncertain significance(Last reviewed: Sep 5, 2017)                        | no assertion criteria provided                       | VCV000633484 | 8                | 132129414      | 633484      | 621909      | rs1563761293 | Neutral    | 0.645    | 0.221        | 0.134    |
| KCNQ3 | 831 | R   | Q   | NM_004519.4(KCNQ3):c.2492G>A (p.Arg831Gln) | Benign familial neonatal seizures 2 not specified Benign familial neonatal seizures                                  | Conflicting interpretations of pathogenicity(Last reviewed: Jan 12, 2018) | criteria provided, conflicting interpretations       | VCV000211238 | 8                | 132129389      | 211238      | 207503      | rs149004528  | Neutral    | 0.587    | 0.299        | 0.114    |
| KCNQ3 | 831 | R   | W   | NM_004519.4(KCNQ3):c.2491C>T (p.Arg831Trp) | Benign familial neonatal seizures not specified Seizures                                                             | Conflicting interpretations of pathogenicity(Last reviewed: Oct 20, 2020) | criteria provided, conflicting interpretations       | VCV000205954 | 8                | 132129390      | 205954      | 202144      | rs185628977  | Neutral    | 0.595    | 0.319        | 0.087    |
| KCNQ3 | 835 | E   | D   | NM_004519.4(KCNQ3):c.2505G>C (p.Glu835Asp) | Benign familial neonatal seizures                                                                                    | Uncertain significance(Last reviewed: Sep 2, 2020)                        | criteria provided, single submitter                  | VCV000538554 | 8                | 132129376      | 538554      | 523620      | rs748320350  | Neutral    | 0.643    | 0.24         | 0.117    |
| KCNQ3 | 845 | F   | S   | NM_004519.4(KCNQ3):c.2534T>C (p.Phe845Ser) | Benign familial neonatal seizures not provided                                                                       | Uncertain significance(Last reviewed: Oct 25, 2021)                       | criteria provided, multiple submitters, no conflicts | VCV000850290 | 8                | 132129347      | 850290      | 834114      | rs751186425  | Neutral    | 0.632    | 0.277        | 0.091    |
| KCNQ3 | 846 | T   | M   | NM_004519.4(KCNQ3):c.2537C>T (p.Thr846Met) | not provided                                                                                                         | Uncertain significance(Last reviewed: Jun 2, 2017)                        | criteria provided, single submitter                  | VCV000432492 | 8                | 132129344      | 432492      | 425776      | rs765623435  | Neutral    | 0.584    | 0.31         | 0.107    |
| KCNQ3 | 849 | G   | S   | NM_004519.4(KCNQ3):c.2545G>A (p.Gly849Ser) | not provided                                                                                                         | Uncertain significance(Last reviewed: Sep 6, 2017)                        | criteria provided, single submitter                  | VCV000449652 | 8                | 132129336      | 449652      | 444210      | rs761201259  | Neutral    | 0.593    | 0.267        | 0.14     |
| KCNQ3 | 856 | T   | I   | NM_004519.4(KCNQ3):c.2567C>T (p.Thr856Ile) | not specified                                                                                                        | Uncertain significance(Last reviewed: Dec 12, 2016)                       | criteria provided, single submitter                  | VCV000373751 | 8                | 132129314      | 373751      | 359827      | rs762078830  | Neutral    | 0.612    | 0.278        | 0.111    |
| KCNQ3 | 871 | P   | A   | NM_004519.4(KCNQ3):c.2611C>G (p.Pro871Ala) | Benign familial neonatal seizures 2 Benign familial neonatal seizures not specified                                  | Uncertain significance(Last reviewed: Apr 23, 2020)                       | criteria provided, multiple submitters, no conflicts | VCV000372395 | 8                | 132129270      | 372395      | 359883      | rs200647826  | Neutral    | 0.582    | 0.297        | 0.121    |
| KCNQ3 | 872 | I   | V   | NM_004519.4(KCNQ3):c.2614A>G (p.Ile872Val) | not provided Benign familial neonatal seizures  Benign familial neonatal seizures 2                                  | Conflicting interpretations of pathogenicity(Last reviewed: Jul 21, 2020) | criteria provided, conflicting interpretations       | VCV000205995 | 8                | 132129267      | 205995      | 202143      | rs199682667  | Neutral    | 0.642    | 0.258        | 0.1      |
| KCNQ4 | 47  | L   | P   | NM_004700.4(KCNQ4):c.140T>C (p.Leu47Pro)   | Autosomal dominant nonsyndromic hearing loss 2A                                                                      | Pathogenic(Last reviewed: Oct 20,                                         | no assertion criteria provided                       | VCV000585006 | 1                | 40784233       | 585006      | 576062      | rs1271250198 | LOF        | 0.766    | 0.15         | 0.084    |

| gene  | pos | aa1 | aa2 | Name                                      | Condition(s)                                                   | Clinical significance (Last reviewed)               | Review status                                        | Accession    | GRCh38Chromosome | GRCh38Location | VariationID | AlleleID(s) | dbSNP ID     | prediction | prob.LOF | prob.Neutral | prob.GOF |
|-------|-----|-----|-----|-------------------------------------------|----------------------------------------------------------------|-----------------------------------------------------|------------------------------------------------------|--------------|------------------|----------------|-------------|-------------|--------------|------------|----------|--------------|----------|
|       |     |     |     |                                           |                                                                | 2017)                                               |                                                      |              |                  |                |             |             |              |            |          |              |          |
| KCNQ4 | 50  | S   | N   | NM_004700.4(KCNQ4):c.149G>A (p.Ser50Asn)  | not specified                                                  | Likely benign(Last reviewed: Dec 6, 2017)           | criteria provided, single submitter                  | VCV000513457 | 1                | 40784242       | 513457      | 498496      | rs1553165192 | Neutral    | 0.716    | 0.15         | 0.134    |
| KCNQ4 | 52  | L   | Q   | NM_004700.4(KCNQ4):c.155T>A (p.Leu52Gln)  | not provided                                                   | Uncertain significance(Last reviewed: Apr 2, 2020)  | criteria provided, single submitter                  | VCV001218070 | 1                | 40784248       | 1218070     | 1208052     | NA           | Neutral    | 0.731    | 0.174        | 0.095    |
| KCNQ4 | 59  | P   | L   | NM_004700.4(KCNQ4):c.176C>T (p.Pro59Leu)  | not provided                                                   | Benign/Likely benign(Last reviewed: Apr 20, 2021)   | criteria provided, multiple submitters, no conflicts | VCV000730845 | 1                | 40784269       | 730845      | 732448      | rs775420649  | Neutral    | 0.575    | 0.304        | 0.122    |
| KCNQ4 | 92  | E   | K   | NM_004700.4(KCNQ4):c.274G>A (p.Glu92Lys)  | not provided                                                   | Uncertain significance(Last reviewed: Dec 3, 2019)  | criteria provided, single submitter                  | VCV001310832 | 1                | 40784367       | 1310832     | 1301536     | NA           | LOF        | 0.84     | 0.032        | 0.128    |
| KCNQ4 | 129 | N   | S   | NM_004700.4(KCNQ4):c.386A>G (p.Asn129Ser) | not specified                                                  | Uncertain significance(Last reviewed: Jan 27, 2021) | criteria provided, single submitter                  | VCV000505394 | 1                | 40817336       | 505394      | 496204      | rs761034165  | LOF        | 0.9      | 0.017        | 0.082    |
| KCNQ4 | 140 | I   | T   | NM_004700.4(KCNQ4):c.419T>C (p.Ile140Thr) | Hearing impairment(not provided)                               | Uncertain significance(Last reviewed: Apr 12, 2021) | criteria provided, single submitter                  | VCV001049775 | 1                | 40818177       | 1049775     | 1037030     | NA           | LOF        | 0.795    | 0.146        | 0.059    |
| KCNQ4 | 182 | F   | L   | NM_004700.4(KCNQ4):c.546C>G (p.Phe182Leu) | Autosomal dominant nonsyndromic hearing loss 2A(not provided)  | Benign/Likely benign(Last reviewed: Sep 23, 2020)   | criteria provided, multiple submitters, no conflicts | VCV000021424 | 1                | 40818518       | 21424       | 34276       | rs80358273   | Neutral    | 0.494    | 0.408        | 0.098    |
| KCNQ4 | 222 | G   | D   | NM_004700.4(KCNQ4):c.665G>A (p.Gly222Asp) | not provided                                                   | Uncertain significance                              | no assertion criteria provided                       | VCV001297718 | 1                | 40818637       | 1297718     | 1287505     | NA           | LOF        | 0.877    | 0.037        | 0.086    |
| KCNQ4 | 227 | L   | P   | NM_004700.4(KCNQ4):c.680T>C (p.Leu227Pro) | not provided                                                   | Uncertain significance(Last reviewed: Oct 29, 2020) | criteria provided, single submitter                  | VCV001313583 | 1                | 40818652       | 1313583     | 1303844     | NA           | LOF        | 0.863    | 0.067        | 0.07     |
| KCNQ4 | 228 | G   | C   | NM_004700.4(KCNQ4):c.682G>T (p.Gly228Cys) | Autosomal dominant nonsyndromic hearing loss 2A(not specified) | Uncertain significance(Last reviewed: Oct 31, 2018) | criteria provided, multiple submitters, no conflicts | VCV000504603 | 1                | 40818654       | 504603      | 496165      | rs367890569  | LOF        | 0.835    | 0.08         | 0.084    |
| KCNQ4 | 229 | S   | L   | NM_004700.4(KCNQ4):c.686C>T (p.Ser229Leu) | not provided                                                   | Uncertain significance(Last reviewed: Sep 18, 2019) | criteria provided, single submitter                  | VCV001312296 | 1                | 40818658       | 1312296     | 1301678     | NA           | LOF        | 0.825    | 0.055        | 0.12     |
| KCNQ4 | 230 | V   | E   | NM_004700.4(KCNQ4):c.689T>A (p.Val230Glu) | Autosomal dominant nonsyndromic hearing loss 2A                | Pathogenic(Last reviewed: Aug 20, 2015)             | no assertion criteria provided                       | VCV000208365 | 1                | 40818661       | 208365      | 204594      | rs797044965  | LOF        | 0.855    | 0.054        | 0.091    |
| KCNQ4 | 234 | H   | L   | NM_004700.4(KCNQ4):c.701A>T (p.His234Leu) | Bilateral sensorineural hearing impairment                     | Pathogenic                                          | criteria provided, single submitter                  | VCV001185583 | 1                | 40818673       | 1185583     | 1175544     | NA           | LOF        | 0.771    | 0.104        | 0.125    |
| KCNQ4 | 234 | H   | R   | NM_004700.4(KCNQ4):c.701A>G (p.His234Arg) | not provided                                                   | Likely pathogenic(Last reviewed: Feb 16, 2017)      | criteria provided, single submitter                  | VCV000423333 | 1                | 40818673       | 423333      | 405169      | rs1064796365 | LOF        | 0.858    | 0.054        | 0.088    |
| KCNQ4 | 251 | F   | L   | NM_004700.4(KCNQ4):c.751T>C (p.Phe251Leu) | not specified                                                  | Uncertain significance(Last reviewed: Nov 14, 2018) | criteria provided, single submitter                  | VCV000666843 | 1                | 40819389       | 666843      | 654209      | rs1000705787 | Neutral    | 0.63     | 0.292        | 0.077    |
| KCNQ4 | 260 | E   | K   | NM_004700.4(KCNQ4):c.778G>A (p.Glu260Lys) | Autosomal dominant nonsyndromic hearing                        | Uncertain                                           | criteria                                             | VCV000021426 | 1                | 40819416       | 21426       | 34278       | rs80358274   | LOF        | 0.903    | 0.018        | 0.079    |



| gene  | pos | aa1 | aa2 | Name                                      | Condition(s)                                                                       | Clinical significance (Last reviewed)               | Review status                                        | Accession    | GRCh38Chromosome | GRCh38Location | VariationID | AlleleID(s) | dbSNP ID     | prediction | prob.LOF | prob.Neutral | prob.GOF |
|-------|-----|-----|-----|-------------------------------------------|------------------------------------------------------------------------------------|-----------------------------------------------------|------------------------------------------------------|--------------|------------------|----------------|-------------|-------------|--------------|------------|----------|--------------|----------|
|       |     |     |     |                                           | loss 2A not provided                                                               | significance(Last reviewed: Jun 7, 2021)            | provided, single submitter                           |              |                  |                |             |             |              |            |          |              |          |
| KCNQ4 | 262 | D   | G   | NM_004700.4(KCNQ4):c.785A>G (p.Asp262Gly) | not provided                                                                       | Uncertain significance(Last reviewed: Sep 30, 2019) | criteria provided, single submitter                  | VCV001308735 | 1                | 40819423       | 1308735     | 1300763     | NA           | LOF        | 0.846    | 0.041        | 0.113    |
| KCNQ4 | 262 | D   | V   | NM_004700.4(KCNQ4):c.785A>T (p.Asp262Val) | Autosomal dominant nonsyndromic hearing loss 2A                                    | Pathogenic(Last reviewed: Aug 20, 2015)             | no assertion criteria provided                       | VCV000021427 | 1                | 40819423       | 21427       | 34279       | rs80358275   | LOF        | 0.829    | 0.034        | 0.137    |
| KCNQ4 | 266 | D   | Y   | NM_004700.4(KCNQ4):c.796G>T (p.Asp266Tyr) | Autosomal dominant nonsyndromic hearing loss 2A                                    | Pathogenic(Last reviewed: Dec 7, 2017)              | no assertion criteria provided                       | VCV000591002 | 1                | 40819434       | 591002      | 581958      | rs1558014576 | LOF        | 0.856    | 0.045        | 0.099    |
| KCNQ4 | 270 | Y   | H   | NM_004700.4(KCNQ4):c.808T>C (p.Tyr270His) | Autosomal dominant nonsyndromic hearing loss 2A                                    | Pathogenic(Last reviewed: Aug 20, 2015)             | no assertion criteria provided                       | VCV000208367 | 1                | 40819446       | 208367      | 204596      | rs797044967  | LOF        | 0.889    | 0.04         | 0.072    |
| KCNQ4 | 274 | L   | H   | NM_004700.4(KCNQ4):c.821T>A (p.Leu274His) | Autosomal dominant nonsyndromic hearing loss 2A                                    | Pathogenic(Last reviewed: Aug 20, 2015)             | no assertion criteria provided                       | VCV000006247 | 1                | 40819459       | 6247        | 21286       | rs80358276   | LOF        | 0.91     | 0.034        | 0.057    |
| KCNQ4 | 275 | W   | C   | NM_004700.4(KCNQ4):c.825G>C (p.Trp275Cys) | not specified Nonsyndromic hearing loss and deafness                               | Likely pathogenic(Last reviewed: Sep 10, 2018)      | reviewed by expert panel                             | VCV000505302 | 1                | 40819463       | 505302      | 496205      | rs956666801  | LOF        | 0.802    | 0.113        | 0.085    |
| KCNQ4 | 275 | W   | R   | NM_004700.4(KCNQ4):c.823T>C (p.Trp275Arg) | Autosomal dominant nonsyndromic hearing loss 2A                                    | Pathogenic(Last reviewed: Aug 20, 2015)             | no assertion criteria provided                       | VCV000208368 | 1                | 40819461       | 208368      | 204597      | rs797044968  | LOF        | 0.881    | 0.052        | 0.067    |
| KCNQ4 | 275 | W   | S   | NM_004700.4(KCNQ4):c.824G>C (p.Trp275Ser) | not provided                                                                       | Likely pathogenic(Last reviewed: Jun 10, 2016)      | criteria provided, single submitter                  | VCV000372951 | 1                | 40819462       | 372951      | 359318      | rs1057518095 | LOF        | 0.849    | 0.066        | 0.084    |
| KCNQ4 | 276 | W   | S   | NM_004700.4(KCNQ4):c.827G>C (p.Trp276Ser) | not provided Autosomal dominant nonsyndromic hearing loss 2A Rare genetic deafness | Pathogenic(Last reviewed: Jun 24, 2014)             | criteria provided, single submitter                  | VCV000006242 | 1                | 40819465       | 6242        | 21281       | rs80358277   | LOF        | 0.867    | 0.056        | 0.077    |
| KCNQ4 | 277 | G   | R   | NM_004700.4(KCNQ4):c.829G>A (p.Gly277Arg) | Autosomal dominant nonsyndromic hearing loss 2A not specified                      | Uncertain significance(Last reviewed: Oct 31, 2018) | criteria provided, multiple submitters, no conflicts | VCV000178690 | 1                | 40819467       | 178690      | 172446      | rs727504459  | LOF        | 0.925    | 0.021        | 0.054    |
| KCNQ4 | 278 | T   | A   | NM_004700.4(KCNQ4):c.832A>G (p.Thr278Ala) | not specified                                                                      | Uncertain significance(Last reviewed: Jul 11, 2017) | criteria provided, single submitter                  | VCV000517414 | 1                | 40819470       | 517414      | 496662      | rs763326539  | LOF        | 0.877    | 0.026        | 0.098    |
| KCNQ4 | 280 | T   | K   | NM_004700.4(KCNQ4):c.839C>A (p.Thr280Lys) | not provided                                                                       | Likely pathogenic(Last reviewed: Jan 20, 2022)      | criteria provided, single submitter                  | VCV001201725 | 1                | 40819879       | 1201725     | 1189636     | NA           | LOF        | 0.92     | 0.019        | 0.061    |
| KCNQ4 | 281 | L   | S   | NM_004700.4(KCNQ4):c.842T>C (p.Leu281Ser) | Autosomal dominant nonsyndromic hearing loss 2A not provided                       | Pathogenic(Last reviewed: Jan 17, 2020)             | criteria provided, multiple submitters, no conflicts | VCV000006246 | 1                | 40819882       | 6246        | 21285       | rs80358278   | LOF        | 0.9      | 0.035        | 0.065    |
| KCNQ4 | 284 | I   | N   | NM_004700.4(KCNQ4):c.851T>A (p.Ile284Asn) | not provided                                                                       | Uncertain significance(Last reviewed: Sep 19, 2017) | criteria provided, single submitter                  | VCV000593866 | 1                | 40819891       | 593866      | 584929      | rs1558015500 | LOF        | 0.882    | 0.06         | 0.058    |
| KCNQ4 | 285 | G   | C   | NM_004700.4(KCNQ4):c.853G>T (p.Gly285Cys) | Autosomal dominant nonsyndromic hearing loss 2A                                    | Pathogenic(Last reviewed: Feb 17, 2011)             | no assertion criteria provided                       | VCV000006244 | 1                | 40819893       | 6244        | 21283       | rs28937588   | LOF        | 0.867    | 0.05         | 0.083    |
| KCNQ4 | 285 | G   | S   | NM_004700.4(KCNQ4):c.853G>A (p.Gly285Ser) | Rare genetic deafness Nonsyndromic hearing loss and deafness Autosomal dominant    | Pathogenic(Last reviewed: Sep 11,                   | reviewed by expert panel                             | VCV000006241 | 1                | 40819893       | 6241        | 21280       | rs28937588   | LOF        | 0.885    | 0.038        | 0.077    |

| gene  | pos | aa1 | aa2 | Name                                       | Condition(s)                                                          | Clinical significance (Last reviewed)               | Review status                       | Accession    | GRCh38Chromosome | GRCh38Location | VariationID | AlleleID(s) | dbSNP ID     | prediction | prob.LOF | prob.Neutral | prob.GOF |
|-------|-----|-----|-----|--------------------------------------------|-----------------------------------------------------------------------|-----------------------------------------------------|-------------------------------------|--------------|------------------|----------------|-------------|-------------|--------------|------------|----------|--------------|----------|
|       |     |     |     |                                            | nonsyndromic hearing loss 2A                                          | 2018)                                               |                                     |              |                  |                |             |             |              |            |          |              |          |
| KCNQ4 | 286 | Y   | C   | NM_004700.4(KCNQ4):c.857A>G (p.Tyr286Cys)  | not specified                                                         | Uncertain significance(Last reviewed: Mar 3, 2016)  | criteria provided, single submitter | VCV000228776 | 1                | 40819897       | 228776      | 228471      | rs876657841  | LOF        | 0.84     | 0.089        | 0.071    |
| KCNQ4 | 286 | Y   | S   | NM_004700.4(KCNQ4):c.857A>C (p.Tyr286Ser)  | Autosomal dominant nonsyndromic hearing loss 2A                       | Likely pathogenic                                   | no assertion criteria provided      | VCV001184480 | 1                | 40819897       | 1184480     | 1174252     | NA           | LOF        | 0.864    | 0.071        | 0.065    |
| KCNQ4 | 287 | G   | R   | NM_004700.4(KCNQ4):c.859G>C (p.Gly287Arg)  | Autosomal dominant nonsyndromic hearing loss 2A(not provided)         | Pathogenic(Last reviewed: Jun 20, 2013)             | no assertion criteria provided      | VCV000156337 | 1                | 40819899       | 156337      | 166117      | rs137853969  | LOF        | 0.883    | 0.041        | 0.076    |
| KCNQ4 | 287 | G   | S   | NM_004700.4(KCNQ4):c.859G>A (p.Gly287Ser)  | Autosomal dominant nonsyndromic hearing loss 2A                       | Likely pathogenic(Last reviewed: Aug 3, 2020)       | criteria provided, single submitter | VCV000979187 | 1                | 40819899       | 979187      | 967260      | rs137853969  | LOF        | 0.891    | 0.036        | 0.073    |
| KCNQ4 | 287 | G   | V   | NM_004700.4(KCNQ4):c.860G>T (p.Gly287Val)  | not provided                                                          | Uncertain significance(Last reviewed: Jun 29, 2020) | criteria provided, single submitter | VCV001304285 | 1                | 40819900       | 1304285     | 1294560     | NA           | LOF        | 0.887    | 0.041        | 0.073    |
| KCNQ4 | 288 | D   | N   | NM_004700.4(KCNQ4):c.862G>A (p.Asp288Asn)  | not provided                                                          | Uncertain significance(Last reviewed: Sep 19, 2019) | criteria provided, single submitter | VCV001304257 | 1                | 40819902       | 1304257     | 1294532     | NA           | LOF        | 0.876    | 0.052        | 0.072    |
| KCNQ4 | 291 | P   | L   | NM_004700.4(KCNQ4):c.872C>T (p.Pro291Leu)  | Autosomal dominant nonsyndromic hearing loss 2A                       | Pathogenic(Last reviewed: Aug 20, 2015)             | no assertion criteria provided      | VCV000208370 | 1                | 40819912       | 208370      | 204599      | rs797044970  | LOF        | 0.869    | 0.033        | 0.099    |
| KCNQ4 | 291 | P   | S   | NM_004700.4(KCNQ4):c.871C>T (p.Pro291Ser)  | Autosomal dominant nonsyndromic hearing loss 2A                       | Pathogenic(Last reviewed: Aug 20, 2015)             | no assertion criteria provided      | VCV000208369 | 1                | 40819911       | 208369      | 204598      | rs797044969  | LOF        | 0.891    | 0.019        | 0.09     |
| KCNQ4 | 296 | G   | S   | NM_004700.4(KCNQ4):c.886G>A (p.Gly296Ser)  | Autosomal dominant nonsyndromic hearing loss 2A                       | Pathogenic(Last reviewed: Aug 20, 2015)             | no assertion criteria provided      | VCV000006249 | 1                | 40819926       | 6249        | 21288       | rs80358279   | LOF        | 0.923    | 0.02         | 0.057    |
| KCNQ4 | 297 | R   | S   | NM_004700.4(KCNQ4):c.891G>T (p.Arg297Ser)  | not provided Autosomal dominant nonsyndromic hearing loss 2A          | Uncertain significance(Last reviewed: Oct 16, 2020) | criteria provided, single submitter | VCV000208371 | 1                | 40819931       | 208371      | 204600      | rs797044971  | LOF        | 0.814    | 0.032        | 0.153    |
| KCNQ4 | 321 | G   | S   | NM_004700.4(KCNQ4):c.961G>A (p.Gly321Ser)  | Autosomal dominant nonsyndromic hearing loss 2A Rare genetic deafness | Likely pathogenic(Last reviewed: Feb 19, 2020)      | criteria provided, single submitter | VCV000006243 | 1                | 40820180       | 6243        | 21282       | rs28939710   | LOF        | 0.914    | 0.021        | 0.065    |
| KCNQ4 | 338 | R   | W   | NM_004700.4(KCNQ4):c.1012C>T (p.Arg338Trp) | not provided                                                          | Uncertain significance(Last reviewed: Apr 23, 2019) | criteria provided, single submitter | VCV001202991 | 1                | 40820231       | 1202991     | 1192869     | NA           | LOF        | 0.802    | 0.098        | 0.1      |
| KCNQ4 | 339 | R   | S   | NM_004700.4(KCNQ4):c.1017G>T (p.Arg339Ser) | not specified                                                         | Uncertain significance(Last reviewed: Jun 12, 2017) | criteria provided, single submitter | VCV000505853 | 1                | 40820236       | 505853      | 496663      | rs769086004  | LOF        | 0.805    | 0.048        | 0.147    |
| KCNQ4 | 351 | R   | C   | NM_004700.4(KCNQ4):c.1051C>T (p.Arg351Cys) | not specified                                                         | Uncertain significance(Last reviewed: Feb 11, 2020) | criteria provided, single submitter | VCV000930077 | 1                | 40822323       | 930077      | 918202      | rs1167593525 | LOF        | 0.774    | 0.086        | 0.139    |
| KCNQ4 | 386 | V   | M   | NM_004700.4(KCNQ4):c.1156G>A (p.Val386Met) | not provided                                                          | Uncertain significance(Last reviewed: Jun 30, 2021) | criteria provided, single submitter | VCV001331134 | 1                | 40824122       | 1331134     | 1321809     | NA           | Neutral    | 0.733    | 0.197        | 0.071    |
| KCNQ4 | 388 | R   | W   | NM_004700.4(KCNQ4):c.1162C>T (p.Arg388Trp) | not specified                                                         | Uncertain significance(Last reviewed: Aug 19, 2014) | criteria provided, single submitter | VCV000163751 | 1                | 40824128       | 163751      | 172447      | rs371079509  | Neutral    | 0.703    | 0.203        | 0.093    |

| gene  | pos | aa1 | aa2 | Name                                       | Condition(s)                                                  | Clinical significance (Last reviewed)               | Review status                                        | Accession    | GRCh38Chromosome | GRCh38Location | VariationID | AlleleID(s) | dbSNP ID     | prediction | prob.LOF | prob.Neutral | prob.GOF |
|-------|-----|-----|-----|--------------------------------------------|---------------------------------------------------------------|-----------------------------------------------------|------------------------------------------------------|--------------|------------------|----------------|-------------|-------------|--------------|------------|----------|--------------|----------|
| KCNQ4 | 398 | E   | G   | NM_004700.4(KCNQ4):c.1193A>G (p.Glu398Gly) | not specified                                                 | Uncertain significance(Last reviewed: Apr 5, 2016)  | criteria provided, single submitter                  | VCV000228769 | 1                | 40824159       | 228769      | 228475      | rs773975779  | Neutral    | 0.584    | 0.309        | 0.107    |
| KCNQ4 | 400 | R   | W   | NM_004700.4(KCNQ4):c.1198C>T (p.Arg400Trp) | not provided                                                  | Uncertain significance(Last reviewed: Jul 23, 2018) | criteria provided, single submitter                  | VCV000651900 | 1                | 40824164       | 651900      | 627832      | rs1239252987 | Neutral    | 0.53     | 0.378        | 0.092    |
| KCNQ4 | 401 | R   | W   | NM_004700.4(KCNQ4):c.1201C>T (p.Arg401Trp) | not specified                                                 | Uncertain significance(Last reviewed: Mar 5, 2015)  | criteria provided, single submitter                  | VCV000228767 | 1                | 40824167       | 228767      | 228476      | rs754165873  | Neutral    | 0.522    | 0.389        | 0.089    |
| KCNQ4 | 403 | P   | L   | NM_004700.4(KCNQ4):c.1208C>T (p.Pro403Leu) | not provided                                                  | Uncertain significance(Last reviewed: Jan 21, 2020) | criteria provided, single submitter                  | VCV001187613 | 1                | 40824174       | 1187613     | 1175905     | NA           | Neutral    | 0.58     | 0.306        | 0.114    |
| KCNQ4 | 406 | D   | N   | NM_004700.4(KCNQ4):c.1216G>A (p.Asp406Asn) | not specified                                                 | Uncertain significance(Last reviewed: Aug 10, 2017) | criteria provided, single submitter                  | VCV000517519 | 1                | 40824182       | 517519      | 496626      | rs1264123218 | Neutral    | 0.66     | 0.249        | 0.091    |
| KCNQ4 | 411 | R   | C   | NM_004700.4(KCNQ4):c.1231C>T (p.Arg411Cys) | not specified not provided                                    | Benign/Likely benign(Last reviewed: Jun 14, 2021)   | criteria provided, multiple submitters, no conflicts | VCV000666707 | 1                | 40824197       | 666707      | 654211      | rs199809248  | Neutral    | 0.524    | 0.382        | 0.094    |
| KCNQ4 | 420 | R   | Q   | NM_004700.4(KCNQ4):c.1259G>A (p.Arg420Gln) | not provided                                                  | Uncertain significance(Last reviewed: Sep 19, 2019) | criteria provided, multiple submitters, no conflicts | VCV000593390 | 1                | 40824225       | 593390      | 584454      | rs374078257  | Neutral    | 0.554    | 0.312        | 0.134    |
| KCNQ4 | 423 | S   | G   | NM_004700.4(KCNQ4):c.1267A>G (p.Ser423Gly) | not provided                                                  | Uncertain significance(Last reviewed: May 24, 2021) | criteria provided, single submitter                  | VCV001199646 | 1                | 40824233       | 1199646     | 1189637     | NA           | Neutral    | 0.509    | 0.395        | 0.096    |
| KCNQ4 | 423 | S   | R   | NM_004700.4(KCNQ4):c.1267A>C (p.Ser423Arg) | not specified                                                 | Uncertain significance(Last reviewed: Apr 12, 2014) | criteria provided, single submitter                  | VCV000163753 | 1                | 40824233       | 163753      | 172448      | rs368294870  | Neutral    | 0.529    | 0.371        | 0.1      |
| KCNQ4 | 428 | P   | L   | NM_004700.4(KCNQ4):c.1283C>T (p.Pro428Leu) | not specified                                                 | Uncertain significance(Last reviewed: Mar 11, 2020) | criteria provided, single submitter                  | VCV000930078 | 1                | 40824249       | 930078      | 918203      | rs932108929  | Neutral    | 0.481    | 0.435        | 0.084    |
| KCNQ4 | 433 | R   | W   | NM_004700.4(KCNQ4):c.1297C>T (p.Arg433Trp) | not provided                                                  | Uncertain significance(Last reviewed: Jul 13, 2017) | criteria provided, single submitter                  | VCV000450535 | 1                | 40831088       | 450535      | 442839      | rs760023398  | Neutral    | 0.608    | 0.306        | 0.087    |
| KCNQ4 | 434 | R   | H   | NM_004700.4(KCNQ4):c.1463G>A (p.Arg488His) | not provided                                                  | Uncertain significance(Last reviewed: Sep 29, 2020) | criteria provided, single submitter                  | VCV001201537 | 1                | 40831254       | 1201537     | 1189638     | NA           | Neutral    | 0.507    | 0.397        | 0.096    |
| KCNQ4 | 442 | M   | T   | NM_004700.4(KCNQ4):c.1325T>C (p.Met442Thr) | not specified                                                 | Benign(Last reviewed: Oct 8, 2019)                  | criteria provided, single submitter                  | VCV000163754 | 1                | 40831116       | 163754      | 172587      | rs142453905  | Neutral    | 0.452    | 0.45         | 0.098    |
| KCNQ4 | 446 | R   | H   | NM_004700.4(KCNQ4):c.1499G>A (p.Arg500His) | not provided                                                  | Uncertain significance(Last reviewed: Jan 23, 2019) | criteria provided, single submitter                  | VCV001304466 | 1                | 40831290       | 1304466     | 1294741     | NA           | Neutral    | 0.542    | 0.347        | 0.11     |
| KCNQ4 | 447 | T   | I   | NM_004700.4(KCNQ4):c.1502C>T (p.Thr501Ile) | Autosomal dominant nonsyndromic hearing loss 2A               | not provided                                        | no assertion provided                                | VCV001339804 | 1                | 40831293       | 1339804     | 1331014     | NA           | Neutral    | 0.476    | 0.425        | 0.099    |
| KCNQ4 | 455 | H   | Q   | NM_004700.4(KCNQ4):c.1365T>G (p.His455Gln) | not specified Autosomal dominant nonsyndromic hearing loss 2A | Benign(Last reviewed: Nov 30,                       | criteria provided,                                   | VCV000045101 | 1                | 40831156       | 45101       | 54268       | rs34287852   | Neutral    | 0.484    | 0.403        | 0.113    |

| gene  | pos | aa1 | aa2 | Name                                       | Condition(s)                                    | Clinical significance (Last reviewed)               | Review status                                        | Accession    | GRCh38Chromosome | GRCh38Location | VariationID | AlleleID(s) | dbSNP ID     | prediction | prob.LOF | prob.Neutral | prob.GOF |
|-------|-----|-----|-----|--------------------------------------------|-------------------------------------------------|-----------------------------------------------------|------------------------------------------------------|--------------|------------------|----------------|-------------|-------------|--------------|------------|----------|--------------|----------|
|       |     |     |     |                                            |                                                 | 2021)                                               | multiple submitters, no conflicts                    |              |                  |                |             |             |              |            |          |              |          |
| KCNQ4 | 458 | P   | T   | NM_004700.4(KCNQ4):c.1372C>A (p.Pro458Thr) | not provided                                    | Uncertain significance(Last reviewed: May 2, 2017)  | criteria provided, single submitter                  | VCV000429247 | 1                | 40831163       | 429247      | 421242      | rs1010168019 | Neutral    | 0.466    | 0.419        | 0.116    |
| KCNQ4 | 469 | Q   | R   | NM_004700.4(KCNQ4):c.1406A>G (p.Gln469Arg) | not specified                                   | Uncertain significance(Last reviewed: Sep 14, 2017) | criteria provided, single submitter                  | VCV000506132 | 1                | 40831197       | 506132      | 496166      | rs1553168273 | Neutral    | 0.522    | 0.363        | 0.116    |
| KCNQ4 | 473 | M   | L   | NM_004700.4(KCNQ4):c.1579A>T (p.Met527Leu) | Inborn genetic diseases not provided            | Uncertain significance(Last reviewed: Jan 2, 2018)  | criteria provided, single submitter                  | VCV000985992 | 1                | 40833079       | 985992      | 973209      | rs759364617  | Neutral    | 0.475    | 0.432        | 0.093    |
| KCNQ4 | 492 | R   | Q   | NM_004700.4(KCNQ4):c.1475G>A (p.Arg492Gln) | not provided                                    | Uncertain significance(Last reviewed: Jul 24, 2015) | criteria provided, single submitter                  | VCV000282147 | 1                | 40831266       | 282147      | 266384      | rs775830606  | Neutral    | 0.552    | 0.328        | 0.119    |
| KCNQ4 | 501 | P   | L   | NM_004700.4(KCNQ4):c.1664C>T (p.Pro555Leu) | not provided                                    | Uncertain significance                              | no assertion criteria provided                       | VCV001050307 | 1                | 40835017       | 1050307     | 1037031     | NA           | Neutral    | 0.501    | 0.4          | 0.099    |
| KCNQ4 | 506 | A   | V   | NM_004700.4(KCNQ4):c.1517C>T (p.Ala506Val) | not specified                                   | Uncertain significance(Last reviewed: Aug 10, 2017) | criteria provided, single submitter                  | VCV000504605 | 1                | 40833017       | 504605      | 496167      | rs145732892  | Neutral    | 0.465    | 0.44         | 0.095    |
| KCNQ4 | 511 | V   | I   | NM_004700.4(KCNQ4):c.1531G>A (p.Val511Ile) | not specified                                   | Uncertain significance(Last reviewed: Jan 15, 2016) | criteria provided, single submitter                  | VCV000228770 | 1                | 40833031       | 228770      | 228479      | rs778538229  | Neutral    | 0.492    | 0.429        | 0.079    |
| KCNQ4 | 522 | T   | M   | NM_004700.4(KCNQ4):c.1565C>T (p.Thr522Met) | Autosomal dominant nonsyndromic hearing loss 2A | Uncertain significance(Last reviewed: May 25, 2018) | criteria provided, single submitter                  | VCV001032259 | 1                | 40833065       | 1032259     | 1019377     | rs748693577  | Neutral    | 0.658    | 0.199        | 0.142    |
| KCNQ4 | 537 | I   | M   | NM_004700.4(KCNQ4):c.1611C>G (p.Ile537Met) | not specified                                   | Uncertain significance(Last reviewed: Aug 21, 2015) | criteria provided, single submitter                  | VCV000228771 | 1                | 40833111       | 228771      | 228480      | rs876657837  | LOF        | 0.816    | 0.122        | 0.062    |
| KCNQ4 | 569 | E   | Q   | NM_004700.4(KCNQ4):c.1867G>C (p.Glu623Gln) | Inborn genetic diseases                         | Uncertain significance(Last reviewed: Mar 15, 2017) | criteria provided, single submitter                  | VCV000985100 | 1                | 40837786       | 985100      | 973210      | rs1648848951 | LOF        | 0.888    | 0.045        | 0.067    |
| KCNQ4 | 601 | D   | Y   | NM_004700.4(KCNQ4):c.1801G>T (p.Asp601Tyr) | not specified                                   | Uncertain significance(Last reviewed: Jul 5, 2015)  | criteria provided, single submitter                  | VCV000228772 | 1                | 40837720       | 228772      | 228482      | rs876657838  | Neutral    | 0.542    | 0.364        | 0.094    |
| KCNQ4 | 606 | D   | E   | NM_004700.4(KCNQ4):c.1818C>G (p.Asp606Glu) | not provided not specified                      | Benign(Last reviewed: Dec 31, 2019)                 | criteria provided, multiple submitters, no conflicts | VCV000163756 | 1                | 40837737       | 163756      | 172588      | rs139835231  | Neutral    | 0.515    | 0.373        | 0.112    |
| KCNQ4 | 652 | L   | V   | NM_004700.4(KCNQ4):c.1954C>G (p.Leu652Val) | not specified                                   | Uncertain significance(Last reviewed: Jun 19, 2014) | criteria provided, single submitter                  | VCV000179794 | 1                | 40838389       | 179794      | 172450      | rs727505133  | Neutral    | 0.499    | 0.411        | 0.09     |
| KCNQ4 | 653 | G   | S   | NM_004700.4(KCNQ4):c.1957G>A (p.Gly653Ser) | not specified                                   | Uncertain significance(Last reviewed: Jan 27, 2016) | criteria provided, single submitter                  | VCV000228773 | 1                | 40838392       | 228773      | 228483      | rs876657839  | Neutral    | 0.644    | 0.242        | 0.114    |
| KCNQ4 | 669 | H   | R   | NM_004700.4(KCNQ4):c.2006A>G (p.His669Arg) | not specified                                   | Uncertain significance(Last reviewed: Sep 8, 2015)  | criteria provided, single submitter                  | VCV000228775 | 1                | 40838441       | 228775      | 228485      | rs749565877  | Neutral    | 0.522    | 0.376        | 0.102    |

| gene  | pos | aa1 | aa2 | Name                                       | Condition(s)                                                                        | Clinical significance (Last reviewed)                                    | Review status                                  | Accession    | GRCh38Chromosome | GRCh38Location | VariationID | AlleleID(s) | dbSNP ID     | prediction | prob.LOF | prob.Neutral | prob.GOF |
|-------|-----|-----|-----|--------------------------------------------|-------------------------------------------------------------------------------------|--------------------------------------------------------------------------|------------------------------------------------|--------------|------------------|----------------|-------------|-------------|--------------|------------|----------|--------------|----------|
| KCNQ4 | 680 | S   | F   | NM_004700.4(KCNQ4):c.2039C>T (p.Ser680Phe) | Autosomal dominant nonsyndromic hearing loss 2A                                     | Pathogenic(Last reviewed: Aug 20, 2015)                                  | no assertion criteria provided                 | VCV000208373 | 1                | 40838474       | 208373      | 204602      | rs772135867  | Neutral    | 0.486    | 0.404        | 0.11     |
| KCNQ5 | 3   | R   | S   | NM_019842.4(KCNQ5):c.7C>A (p.Arg3Ser)      | not provided Intellectual disability Intellectual disability, autosomal dominant 46 | Conflicting interpretations of pathogenicity(Last reviewed: Dec 1, 2021) | criteria provided, conflicting interpretations | VCV000932587 | 6                | 72622196       | 932587      | 920763      | rs549110435  | LOF        | 0.678    | 0.123        | 0.199    |
| KCNQ5 | 5   | H   | Q   | NM_019842.4(KCNQ5):c.15C>G (p.His5Gln)     | Intellectual disability, autosomal dominant 46                                      | Uncertain significance(Last reviewed: Nov 3, 2021)                       | criteria provided, single submitter            | VCV001319294 | 6                | 72622204       | 1319294     | 1309547     | NA           | GOF        | 0.665    | 0.114        | 0.221    |
| KCNQ5 | 8   | G   | R   | NM_019842.4(KCNQ5):c.22G>A (p.Gly8Arg)     | Intellectual disability                                                             | Likely benign(Last reviewed: Jan 1, 2019)                                | no assertion criteria provided                 | VCV000975566 | 6                | 72622211       | 975566      | 963615      | rs191331629  | GOF        | 0.645    | 0.094        | 0.261    |
| KCNQ5 | 17  | W   | R   | NM_019842.4(KCNQ5):c.49T>C (p.Trp17Arg)    | Intellectual disability, autosomal dominant 46                                      | Uncertain significance(Last reviewed: Jun 21, 2019)                      | criteria provided, single submitter            | VCV000932094 | 6                | 72622238       | 932094      | 919051      | rs971617867  | LOF        | 0.779    | 0.104        | 0.116    |
| KCNQ5 | 29  | G   | W   | NM_019842.4(KCNQ5):c.85G>T (p.Gly29Trp)    | not provided                                                                        | Uncertain significance(Last reviewed: Nov 1, 2021)                       | criteria provided, single submitter            | VCV001335629 | 6                | 72622274       | 1335629     | 1326600     | NA           | LOF        | 0.7      | 0.123        | 0.177    |
| KCNQ5 | 39  | V   | A   | NM_019842.4(KCNQ5):c.116T>C (p.Val39Ala)   | not provided                                                                        | Uncertain significance(Last reviewed: Nov 20, 2019)                      | criteria provided, single submitter            | VCV001310055 | 6                | 72622305       | 1310055     | 1301906     | NA           | LOF        | 0.754    | 0.099        | 0.147    |
| KCNQ5 | 80  | R   | W   | NM_019842.4(KCNQ5):c.238C>T (p.Arg80Trp)   | not provided                                                                        | Likely benign(Last reviewed: Nov 1, 2020)                                | criteria provided, single submitter            | VCV001013510 | 6                | 72622427       | 1013510     | 1000544     | rs750955277  | LOF        | 0.675    | 0.128        | 0.197    |
| KCNQ5 | 98  | S   | G   | NM_019842.4(KCNQ5):c.292A>G (p.Ser98Gly)   | Intellectual disability, autosomal dominant 46                                      | Uncertain significance(Last reviewed: Feb 24, 2021)                      | criteria provided, single submitter            | VCV001342329 | 6                | 72622481       | 1342329     | 1333905     | NA           | LOF        | 0.721    | 0.085        | 0.194    |
| KCNQ5 | 109 | R   | L   | NM_019842.4(KCNQ5):c.326G>T (p.Arg109Leu)  | Intellectual disability, autosomal dominant 46                                      | Uncertain significance(Last reviewed: Oct 25, 2021)                      | criteria provided, single submitter            | VCV001321257 | 6                | 72622515       | 1321257     | 1311512     | NA           | LOF        | 0.756    | 0.052        | 0.192    |
| KCNQ5 | 145 | V   | G   | NM_019842.4(KCNQ5):c.434T>G (p.Val145Gly)  | Intellectual disability, autosomal dominant 46                                      | Pathogenic(Last reviewed: Aug 3, 2017)                                   | no assertion criteria provided                 | VCV000431385 | 6                | 73003943       | 431385      | 424908      | rs1135401955 | LOF        | 0.871    | 0.032        | 0.097    |
| KCNQ5 | 161 | L   | S   | NM_019842.4(KCNQ5):c.482T>C (p.Leu161Ser)  | not provided                                                                        | Uncertain significance(Last reviewed: May 1, 2020)                       | criteria provided, single submitter            | VCV000932588 | 6                | 73003991       | 932588      | 920764      | rs1342144805 | LOF        | 0.877    | 0.031        | 0.091    |
| KCNQ5 | 170 | V   | I   | NM_019842.4(KCNQ5):c.508G>A (p.Val170Ile)  | Intellectual disability                                                             | Uncertain significance(Last reviewed: Apr 20, 2020)                      | criteria provided, single submitter            | VCV000978947 | 6                | 73041954       | 978947      | 966954      | rs771263285  | LOF        | 0.859    | 0.045        | 0.095    |
| KCNQ5 | 174 | E   | D   | NM_019842.4(KCNQ5):c.522G>C (p.Glu174Asp)  | Intellectual disability, autosomal dominant 46                                      | Uncertain significance(Last reviewed: Apr 17, 2019)                      | criteria provided, single submitter            | VCV000931402 | 6                | 73041968       | 931402      | 919052      | rs1771727703 | LOF        | 0.838    | 0.035        | 0.127    |
| KCNQ5 | 187 | R   | Q   | NM_019842.4(KCNQ5):c.560G>A (p.Arg187Gln)  | not provided                                                                        | Pathogenic(Last reviewed: Jan 12, 2022)                                  | criteria provided, single submitter            | VCV001334356 | 6                | 73042006       | 1334356     | 1325228     | NA           | GOF        | 0.703    | 0.045        | 0.252    |
| KCNQ5 | 256 | G   | A   | NM_019842.4(KCNQ5):c.767G>C (p.Gly256Ala)  | not provided                                                                        | Uncertain significance(Last reviewed: Sep 9, 2021)                       | criteria provided, single submitter            | VCV001253854 | 6                | 73077472       | 1253854     | 1243791     | NA           | LOF        | 0.832    | 0.03         | 0.137    |

| gene  | pos | aa1 | aa2 | Name                                       | Condition(s)                                                | Clinical significance (Last reviewed)               | Review status                                        | Accession    | GRCh38Chromosome | GRCh38Location | VariationID | AlleleID(s) | dbSNP ID     | prediction | prob.LOF | prob.Neutral | prob.GOF |
|-------|-----|-----|-----|--------------------------------------------|-------------------------------------------------------------|-----------------------------------------------------|------------------------------------------------------|--------------|------------------|----------------|-------------|-------------|--------------|------------|----------|--------------|----------|
| KCNQ5 | 292 | N   | S   | NM_019842.4(KCNQ5):c.875A>G (p.Asn292Ser)  | Intellectual disability, autosomal dominant 46              | Likely pathogenic(Last reviewed: Mar 18, 2020)      | no assertion criteria provided                       | VCV000988749 | 6                | 73077844       | 988749      | 976653      | NA           | GOF        | 0.696    | 0.055        | 0.249    |
| KCNQ5 | 341 | L   | I   | NM_019842.4(KCNQ5):c.1021C>A (p.Leu341Ile) | Intellectual disability, autosomal dominant 46              | Pathogenic(Last reviewed: Aug 3, 2017)              | no assertion criteria provided                       | VCV000431386 | 6                | 73105359       | 431386      | 424909      | rs1135401956 | LOF        | 0.857    | 0.046        | 0.097    |
| KCNQ5 | 347 | G   | A   | NM_019842.4(KCNQ5):c.1040G>C (p.Gly347Ala) | Intellectual disability, autosomal dominant 46              | Likely pathogenic(Last reviewed: Jan 1, 2019)       | no assertion criteria provided                       | VCV000975567 | 6                | 73111318       | 975567      | 963616      | rs1775232605 | LOF        | 0.817    | 0.023        | 0.16     |
| KCNQ5 | 347 | G   | S   | NM_019842.4(KCNQ5):c.1039G>A (p.Gly347Ser) | Global developmental delay Inborn genetic diseases          | Likely pathogenic(Last reviewed: Nov 1, 2019)       | criteria provided, multiple submitters, no conflicts | VCV000521883 | 6                | 73111317       | 521883      | 511686      | rs1554210415 | LOF        | 0.797    | 0.022        | 0.181    |
| KCNQ5 | 369 | P   | L   | NM_019842.4(KCNQ5):c.1106C>T (p.Pro369Leu) | Intellectual disability, autosomal dominant 46              | Uncertain significance(Last reviewed: Nov 17, 2017) | criteria provided, single submitter                  | VCV000976198 | 6                | 73111384       | 976198      | 964281      | rs1135401958 | GOF        | 0.639    | 0.044        | 0.317    |
| KCNQ5 | 369 | P   | Q   | NM_019842.4(KCNQ5):c.1106C>A (p.Pro369Gln) | Intellectual disability, autosomal dominant 46              | Pathogenic(Last reviewed: May 28, 2019)             | criteria provided, single submitter                  | VCV000802242 | 6                | 73111384       | 802242      | 790657      | rs1135401958 | GOF        | 0.536    | 0.041        | 0.424    |
| KCNQ5 | 369 | P   | R   | NM_019842.4(KCNQ5):c.1106C>G (p.Pro369Arg) | Intellectual disability, autosomal dominant 46              | Pathogenic(Last reviewed: Aug 3, 2017)              | no assertion criteria provided                       | VCV000431388 | 6                | 73111384       | 431388      | 424911      | rs1135401958 | GOF        | 0.478    | 0.043        | 0.479    |
| KCNQ5 | 369 | P   | S   | NM_019842.4(KCNQ5):c.1105C>T (p.Pro369Ser) | not provided                                                | Pathogenic(Last reviewed: Dec 22, 2017)             | criteria provided, single submitter                  | VCV001072107 | 6                | 73111383       | 1072107     | 1060844     | NA           | GOF        | 0.603    | 0.04         | 0.356    |
| KCNQ5 | 369 | P   | T   | NM_019842.4(KCNQ5):c.1105C>A (p.Pro369Thr) | Inborn genetic diseases                                     | Likely pathogenic(Last reviewed: Dec 14, 2017)      | criteria provided, single submitter                  | VCV000521362 | 6                | 73111383       | 521362      | 511687      | rs1554210418 | GOF        | 0.599    | 0.041        | 0.36     |
| KCNQ5 | 408 | Q   | K   | NM_019842.4(KCNQ5):c.1249C>A (p.Gln417Lys) | not provided                                                | Uncertain significance(Last reviewed: Apr 19, 2021) | criteria provided, single submitter                  | VCV001314753 | 6                | 73133422       | 1314753     | 1305014     | NA           | GOF        | 0.616    | 0.064        | 0.32     |
| KCNQ5 | 422 | R   | W   | NM_019842.4(KCNQ5):c.1291A>T (p.Arg431Trp) | Intellectual disability, autosomal dominant 46              | Likely pathogenic(Last reviewed: Apr 3, 2020)       | no assertion criteria provided                       | VCV000984630 | 6                | 73133464       | 984630      | 972719      | rs1776322078 | GOF        | 0.653    | 0.099        | 0.248    |
| KCNQ5 | 429 | R   | G   | NM_019842.4(KCNQ5):c.1312C>G (p.Arg438Gly) | Intellectual disability, mild                               | Uncertain significance(Last reviewed: Nov 14, 2019) | no assertion criteria provided                       | VCV000977441 | 6                | 73133485       | 977441      | 965500      | rs750114221  | LOF        | 0.717    | 0.085        | 0.197    |
| KCNQ5 | 448 | S   | I   | NM_019842.4(KCNQ5):c.1286G>T (p.Ser429Ile) | not provided Intellectual disability, autosomal dominant 46 | Pathogenic(Last reviewed: Dec 13, 2017)             | criteria provided, single submitter                  | VCV000431387 | 6                | 73133459       | 431387      | 424910      | rs1135401957 | GOF        | 0.47     | 0.057        | 0.473    |
| KCNQ5 | 485 | E   | V   | NM_019842.4(KCNQ5):c.1784A>T (p.Glu595Val) | not provided                                                | Uncertain significance(Last reviewed: Nov 12, 2020) | criteria provided, single submitter                  | VCV001305324 | 6                | 73192639       | 1305324     | 1295599     | NA           | GOF        | 0.558    | 0.067        | 0.375    |
| KCNQ5 | 493 | L   | F   | NM_019842.4(KCNQ5):c.1807C>T (p.Leu603Phe) | not provided                                                | Uncertain significance(Last reviewed: Aug 5, 2019)  | criteria provided, single submitter                  | VCV001307615 | 6                | 73192662       | 1307615     | 1298885     | NA           | LOF        | 0.724    | 0.061        | 0.215    |
| KCNQ5 | 501 | D   | N   | NM_019842.4(KCNQ5):c.1501G>A (p.Asp501Asn) | Intellectual disability, autosomal dominant 46              | Uncertain significance(Last reviewed: Apr 27, 2019) | criteria provided, single submitter                  | VCV000638520 | 6                | 73169778       | 638520      | 626166      | rs1582480404 | GOF        | 0.612    | 0.057        | 0.331    |

| gene  | pos | aa1 | aa2 | Name                                       | Condition(s)                                                 | Clinical significance (Last reviewed)               | Review status                                        | Accession    | GRCh38Chromosome | GRCh38Location | VariationID | AlleleID(s) | dbSNP ID     | prediction | prob.LOF | prob.Neutral | prob.GOF |
|-------|-----|-----|-----|--------------------------------------------|--------------------------------------------------------------|-----------------------------------------------------|------------------------------------------------------|--------------|------------------|----------------|-------------|-------------|--------------|------------|----------|--------------|----------|
| KCNQ5 | 518 | Q   | H   | NM_019842.4(KCNQ5):c.1884A>T (p.Gln628His) | not provided                                                 | Uncertain significance(Last reviewed: Jul 20, 2019) | criteria provided, single submitter                  | VCV001306814 | 6                | 73194499       | 1306814     | 1295764     | NA           | LOF        | 0.731    | 0.038        | 0.231    |
| KCNQ5 | 526 | A   | P   | NM_019842.4(KCNQ5):c.1906G>C (p.Ala636Pro) | not provided                                                 | Uncertain significance(Last reviewed: Aug 1, 2020)  | criteria provided, single submitter                  | VCV001013513 | 6                | 73194521       | 1013513     | 1000547     | rs774223061  | LOF        | 0.79     | 0.033        | 0.176    |
| KCNQ5 | 675 | V   | A   | NM_019842.4(KCNQ5):c.2354T>C (p.Val785Ala) | Seizures                                                     | Uncertain significance(Last reviewed: Jan 6, 2020)  | no assertion criteria provided                       | VCV000977399 | 6                | 73194969       | 977399      | 965501      | rs747610703  | LOF        | 0.816    | 0.044        | 0.14     |
| KCNQ5 | 692 | R   | H   | NM_019842.4(KCNQ5):c.2405G>A (p.Arg802His) | not provided                                                 | Likely benign                                       | no assertion criteria provided                       | VCV001299845 | 6                | 73195020       | 1299845     | 1289897     | NA           | LOF        | 0.761    | 0.059        | 0.18     |
| KCNQ5 | 704 | A   | T   | NM_019842.4(KCNQ5):c.2110G>A (p.Ala704Thr) | Malignant tumor of prostate                                  | Uncertain significance                              | no assertion criteria provided                       | VCV000161727 | 6                | 73194725       | 161727      | 171425      | rs148543637  | LOF        | 0.725    | 0.044        | 0.231    |
| KCNQ5 | 726 | I   | N   | NM_019842.4(KCNQ5):c.2507T>A (p.Ile836Asn) | not provided                                                 | Uncertain significance(Last reviewed: Aug 1, 2021)  | criteria provided, single submitter                  | VCV001299035 | 6                | 73195122       | 1299035     | 1288897     | NA           | LOF        | 0.841    | 0.057        | 0.101    |
| KCNQ5 | 780 | E   | V   | NM_019842.4(KCNQ5):c.2366A>T (p.Glu789Val) | Intellectual disability, autosomal dominant 46  not provided | Uncertain significance(Last reviewed: May 14, 2021) | criteria provided, multiple submitters, no conflicts | VCV000809966 | 6                | 73194981       | 809966      | 795893      | rs771383058  | LOF        | 0.765    | 0.069        | 0.166    |
| KCNQ5 | 799 | R   | Q   | NM_019842.4(KCNQ5):c.2726G>A (p.Arg909Gln) | Intellectual disability, autosomal dominant 46               | Uncertain significance(Last reviewed: Jan 29, 2021) | criteria provided, single submitter                  | VCV001341834 | 6                | 73195341       | 1341834     | 1333081     | NA           | LOF        | 0.734    | 0.06         | 0.206    |
| KCNQ5 | 817 | L   | F   | NM_019842.4(KCNQ5):c.2478G>C (p.Leu826Phe) | Intellectual disability, autosomal dominant 46               | Uncertain significance(Last reviewed: Mar 17, 2020) | criteria provided, single submitter                  | VCV000931884 | 6                | 73195093       | 931884      | 919053      | rs1765738668 | LOF        | 0.842    | 0.049        | 0.109    |
| KCNQ5 | 820 | K   | Q   | NM_019842.4(KCNQ5):c.2788A>C (p.Lys930Gln) | Intellectual disability, autosomal dominant 46               | Uncertain significance(Last reviewed: Feb 17, 2020) | criteria provided, single submitter                  | VCV001027752 | 6                | 73195403       | 1027752     | 1016776     | rs1765753921 | GOF        | 0.694    | 0.048        | 0.258    |
| KCNQ5 | 928 | H   | Q   | NM_019842.4(KCNQ5):c.2784T>A (p.His928Gln) | not provided                                                 | Benign(Last reviewed: Jun 28, 2018)                 | criteria provided, single submitter                  | VCV000750703 | 6                | 73195399       | 750703      | 750213      | rs117938048  | LOF        | 0.737    | 0.058        | 0.205    |

**Supplementary Table 3.** Predicted functional effect of 3760 known voltage-gated potassium channels missense variants. Known variants were extracted from ClinVar (<https://www.ncbi.nlm.nih.gov/clinvar>) with the search query “KCNA1[gene] OR KCNA2[gene] OR (...) KCNQ5[gene]” for all channels in the training dataset and filtered for missense variants. This yielded 3769 records, last accessed 7/MAR/2022 1:59 pm. Of these, 9 records were excluded due to missing data. Protein changes listed in ClinVar were matched to their corresponding canonical sequences (UniProt). Functional effects were predicted with our pre-trained MTL-SVM model (column ‘prediction’) with class probabilities estimated by Platt scaling (columns ‘prob.LOF’, ‘prob.Neutral’, ‘prob.GOF’). Interestingly, variants with a predicted neutral effect were significantly more likely to be benign or likely benign (n = 127/1202) than variants with a predicted non-neutral effect (n = 87/2344, Welch’s two-sample t-test  $p < 0.001$ ) Abbreviations: aa1 – wild-type amino acid; aa2 – mutated amino acid; LOF – loss-of-function; GOF – gain-of-function; pos – missense variant position on the amino acid sequence.
